# Supplementary material for: Novel Low Abundance and Transient RNAs in Yeast Revealed by Tiling Microarrays and Ultra High–Throughput Sequencing Are Not Conserved Across Closely Related Yeast Species
Source: PubMed Central journal article supplement (PMC2601015; doi:10.1371/journal.pgen.1000299), 2008-12-19

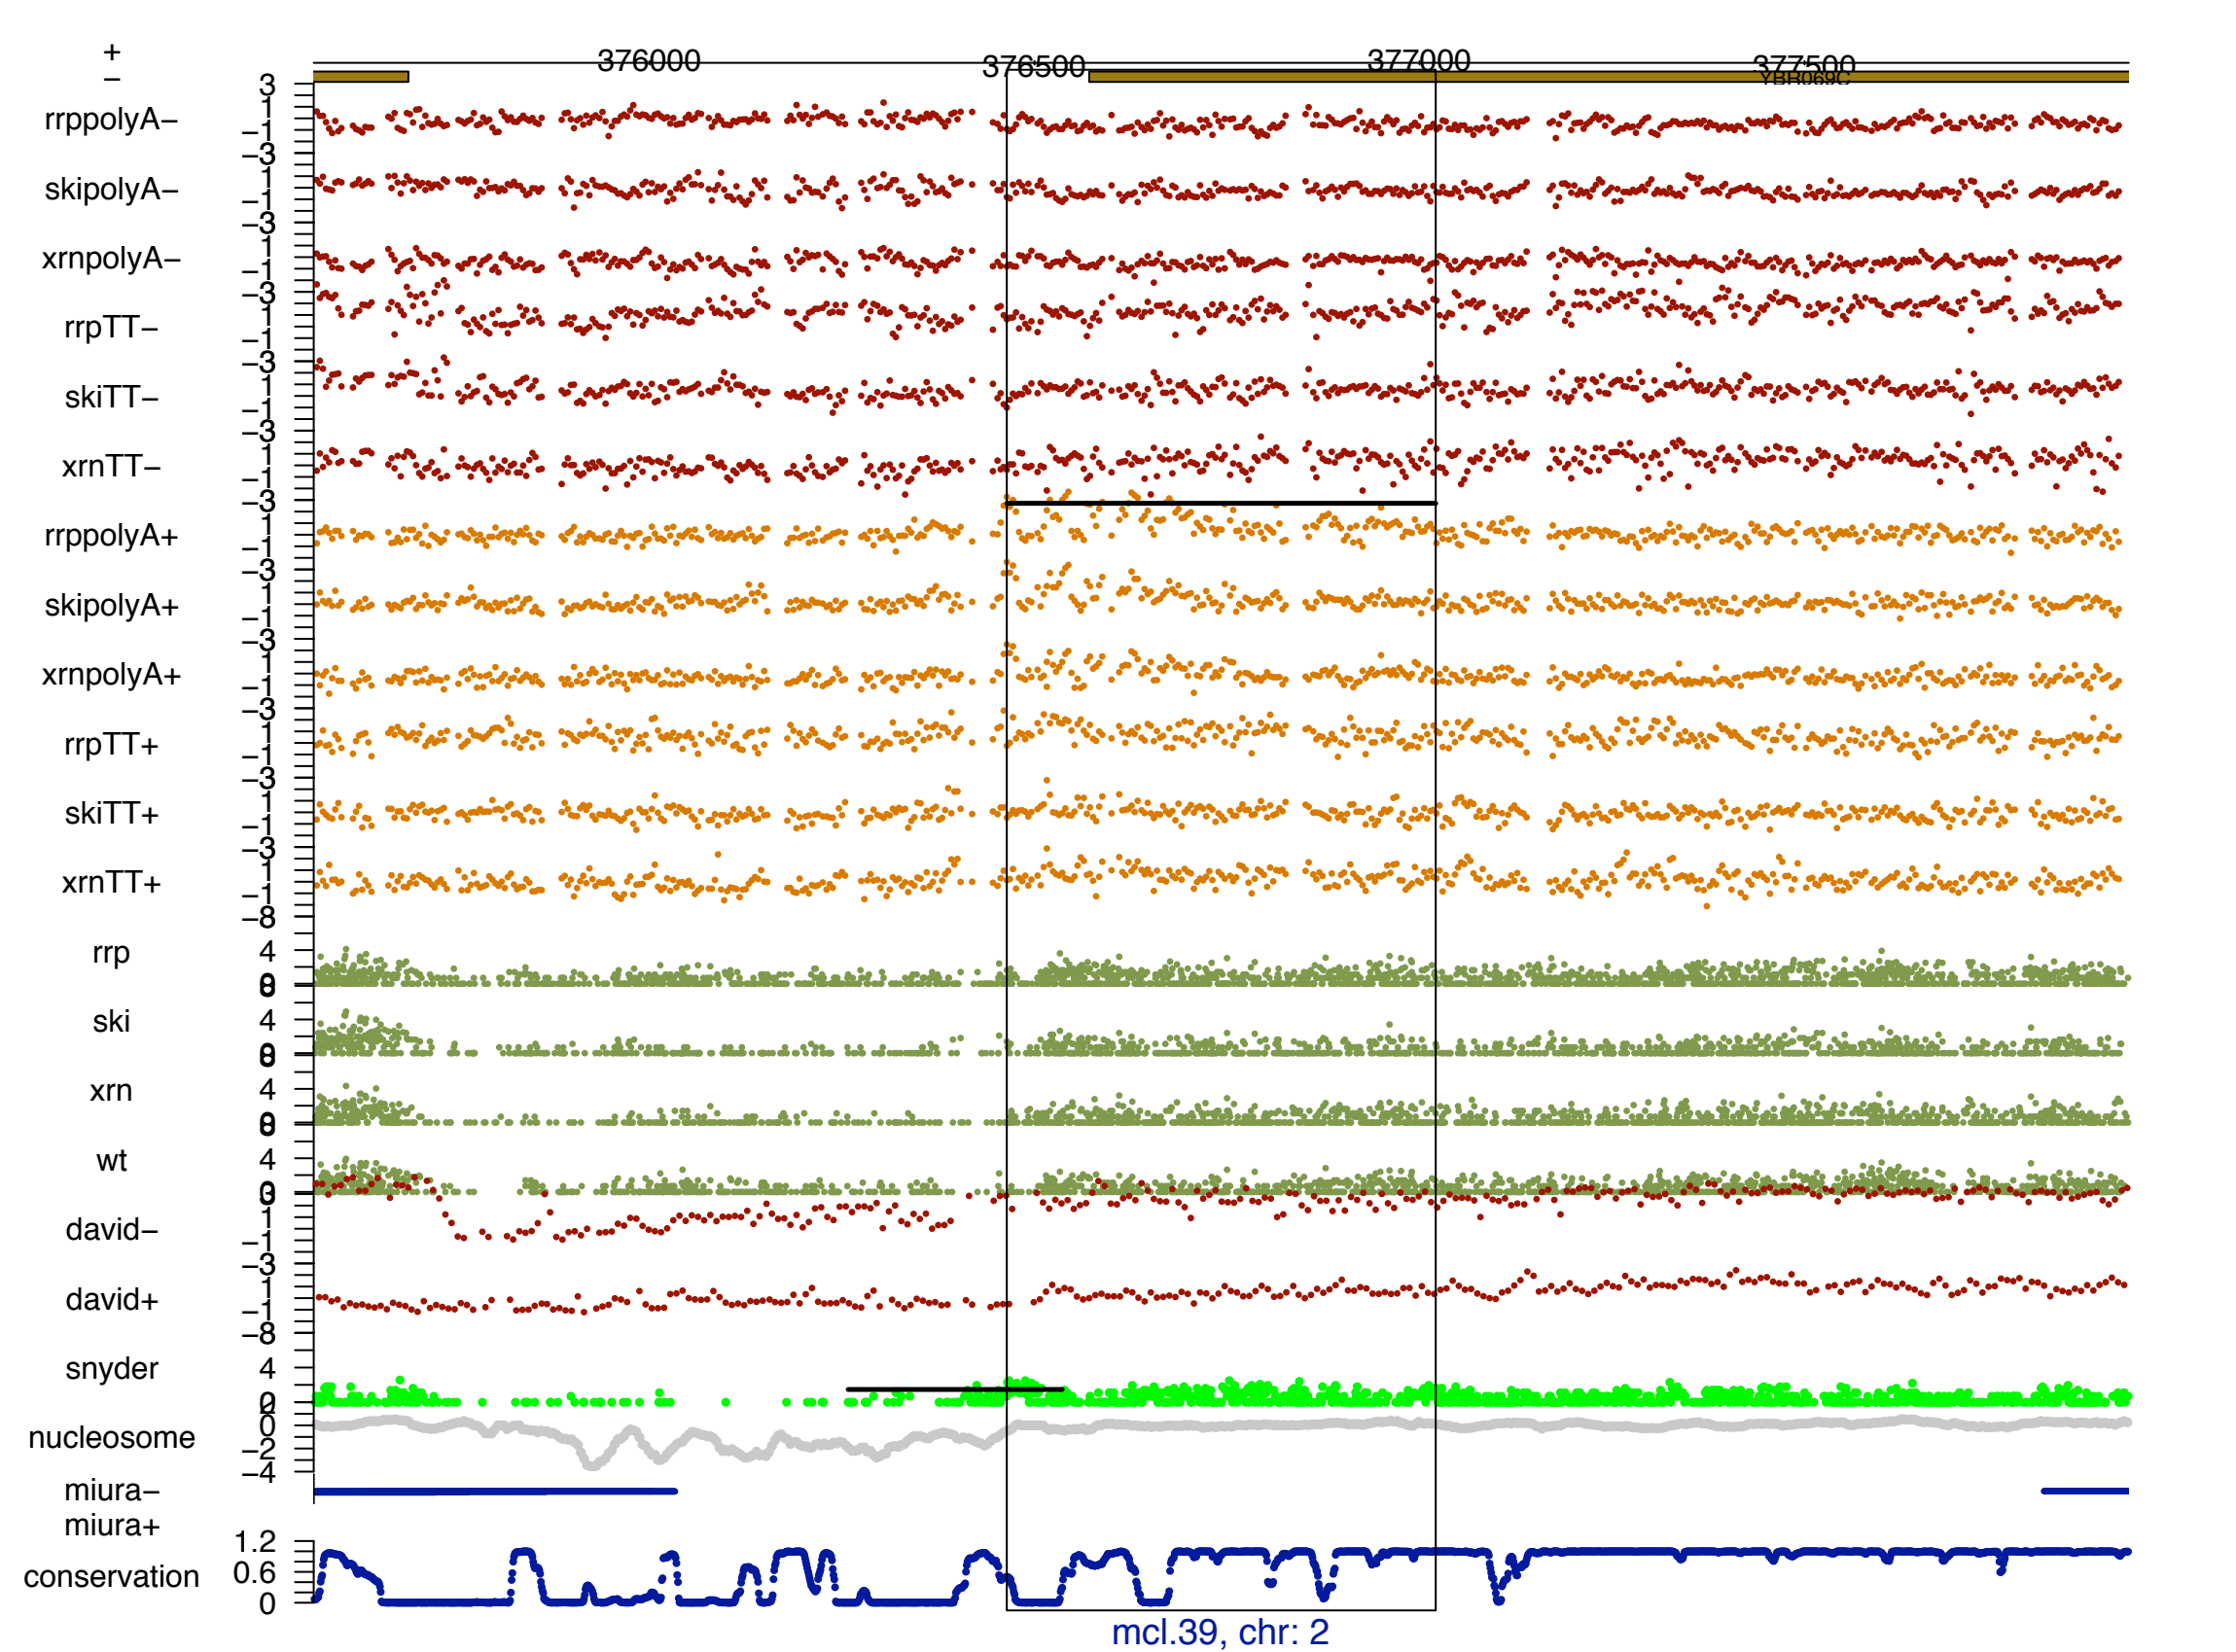

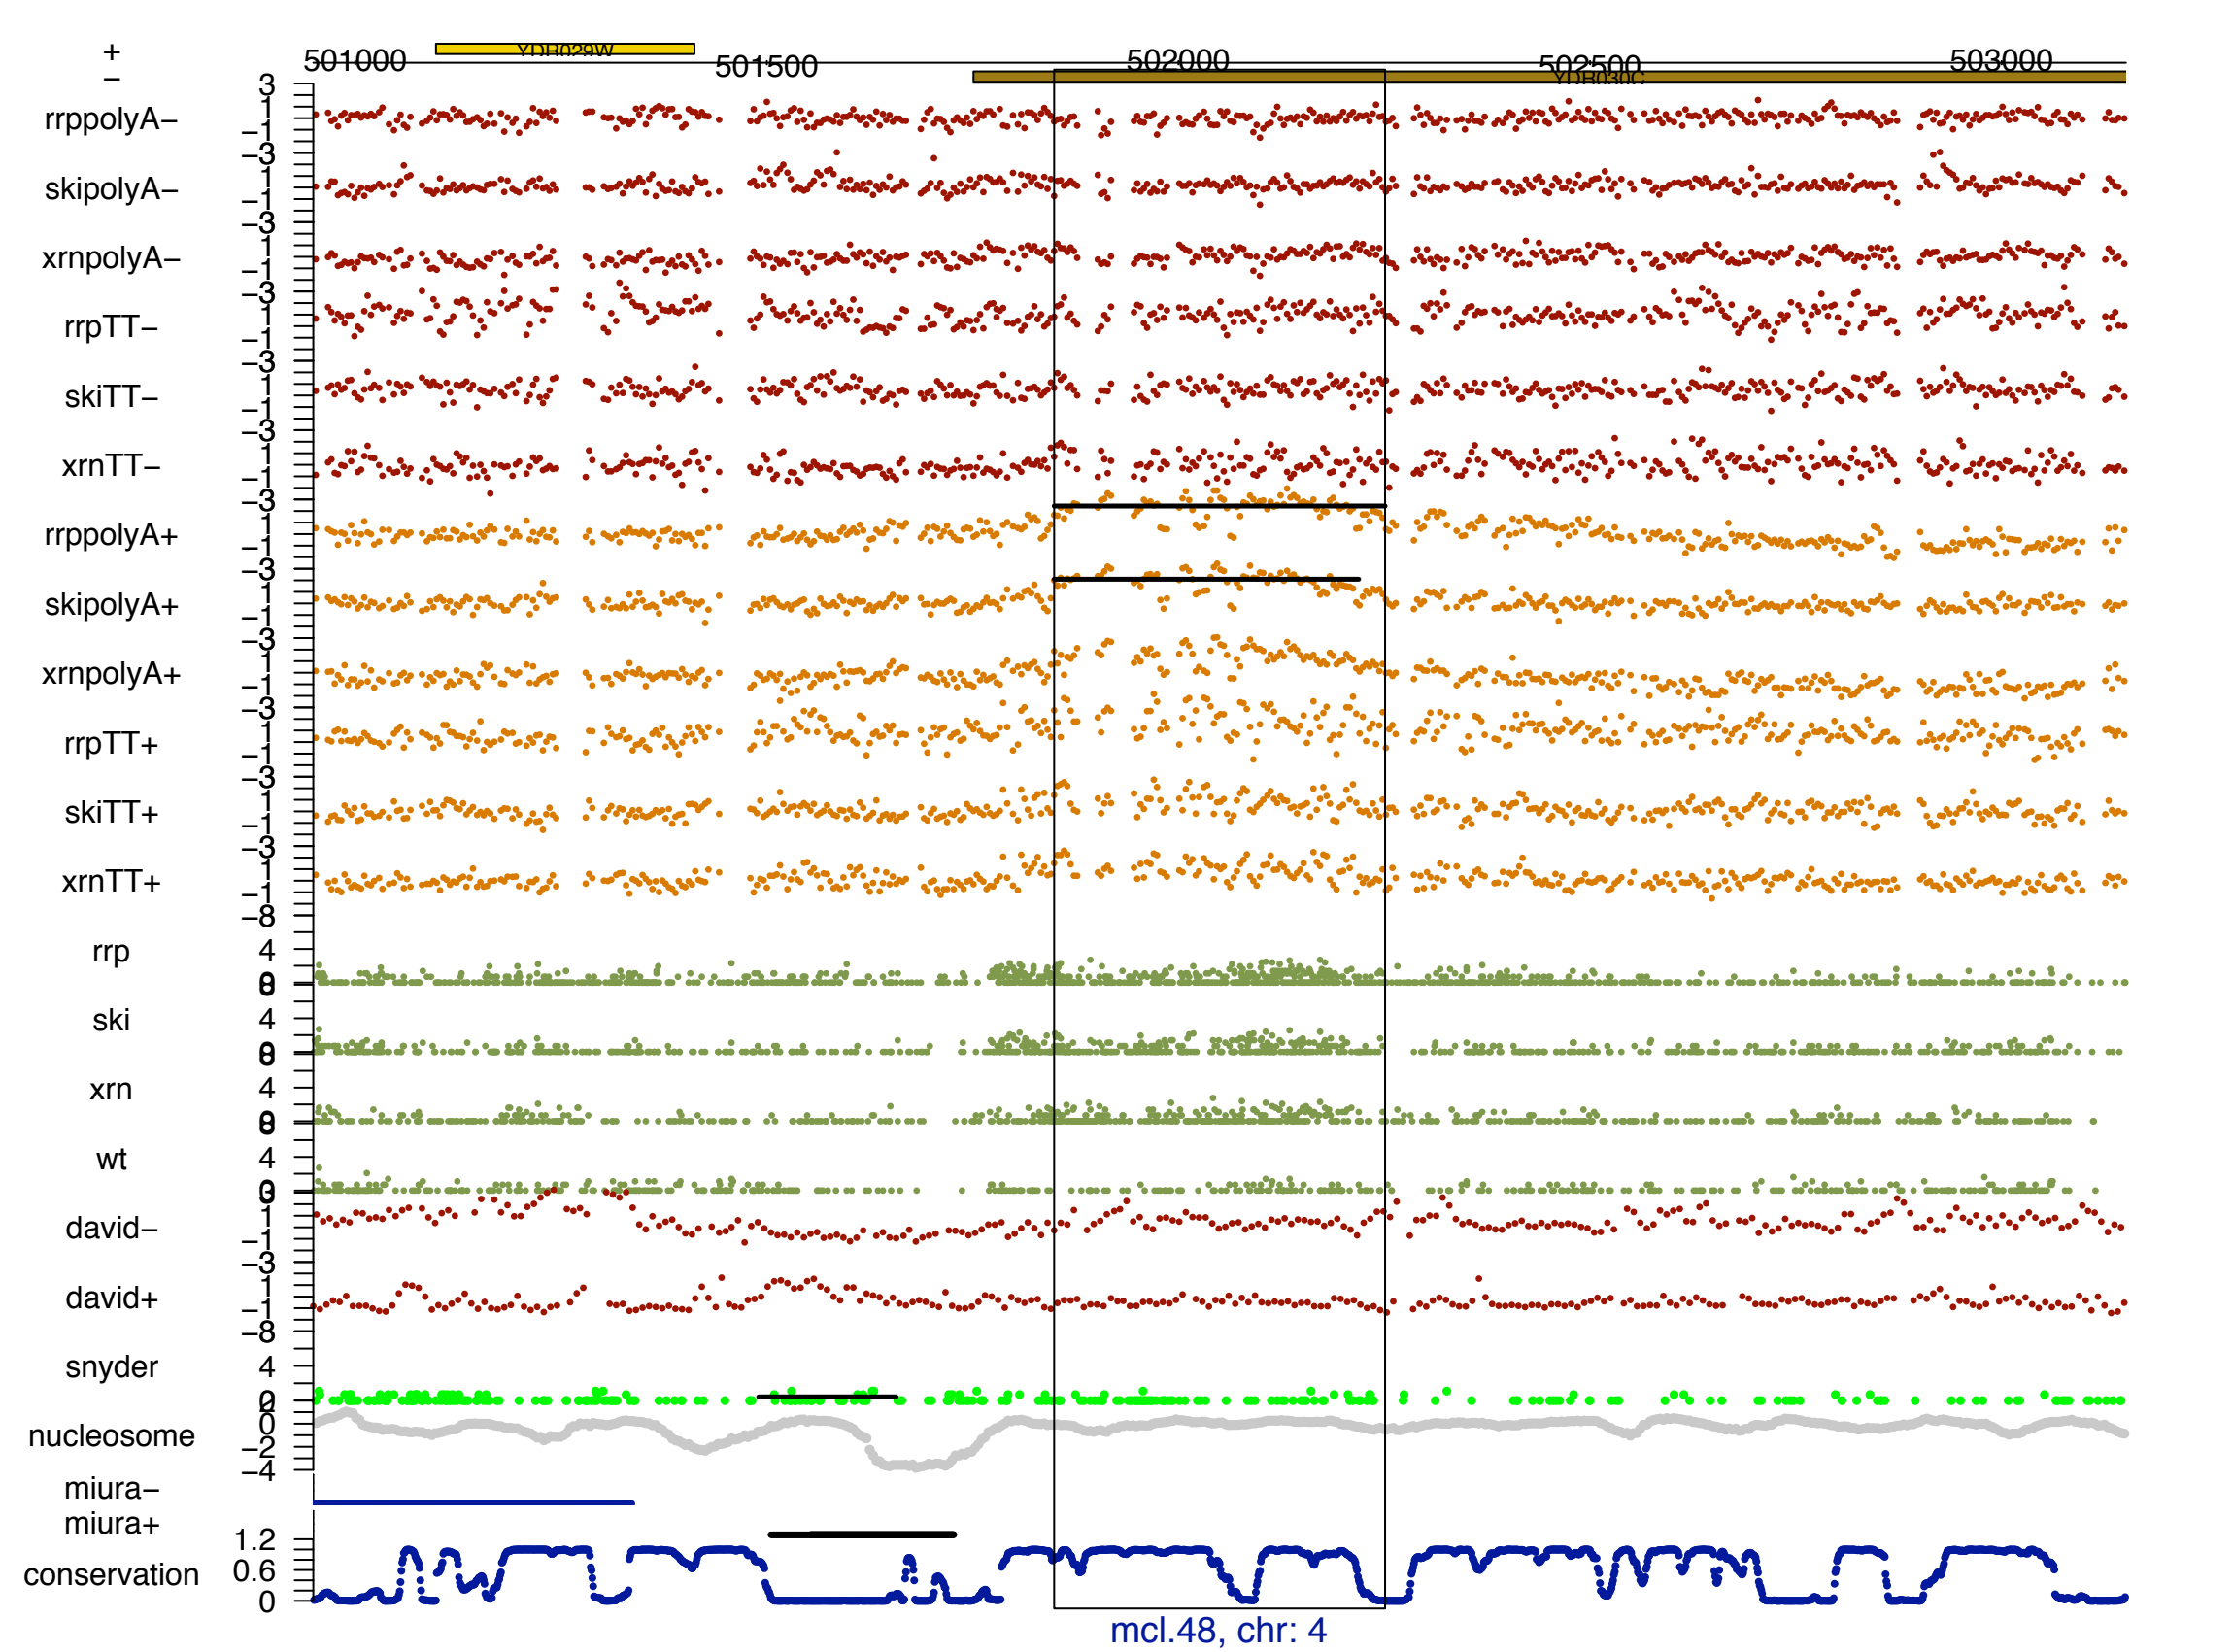

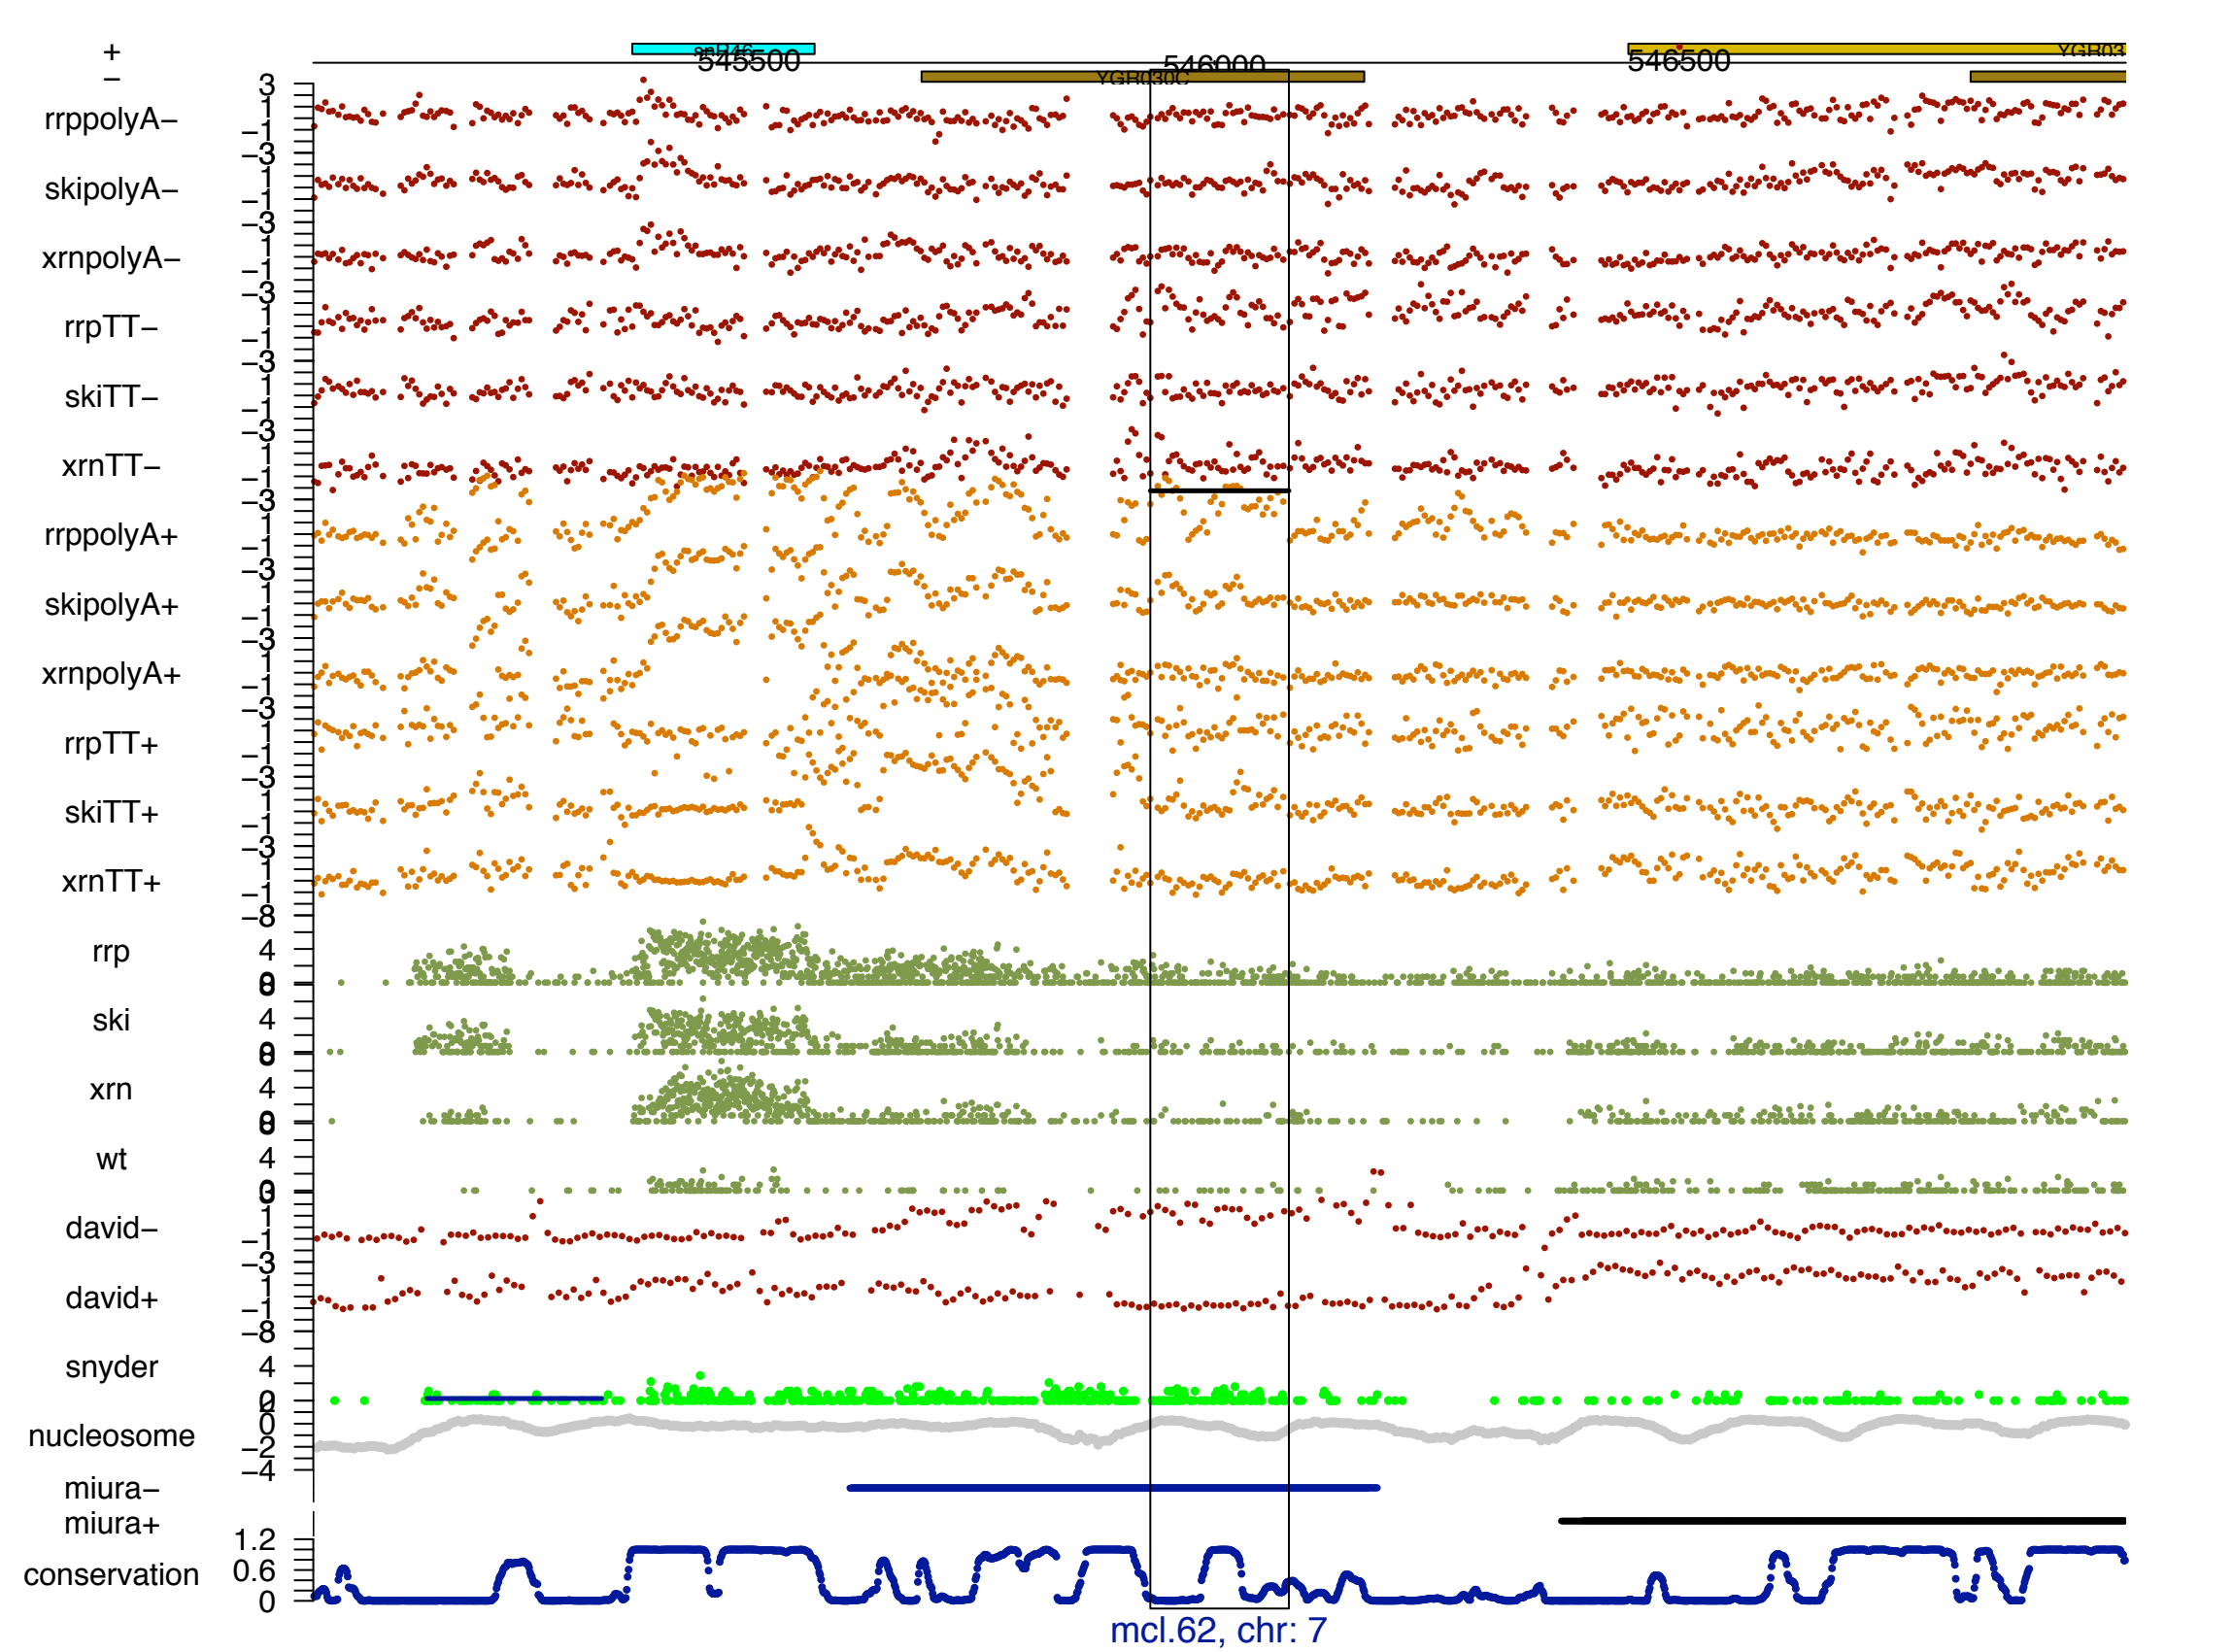



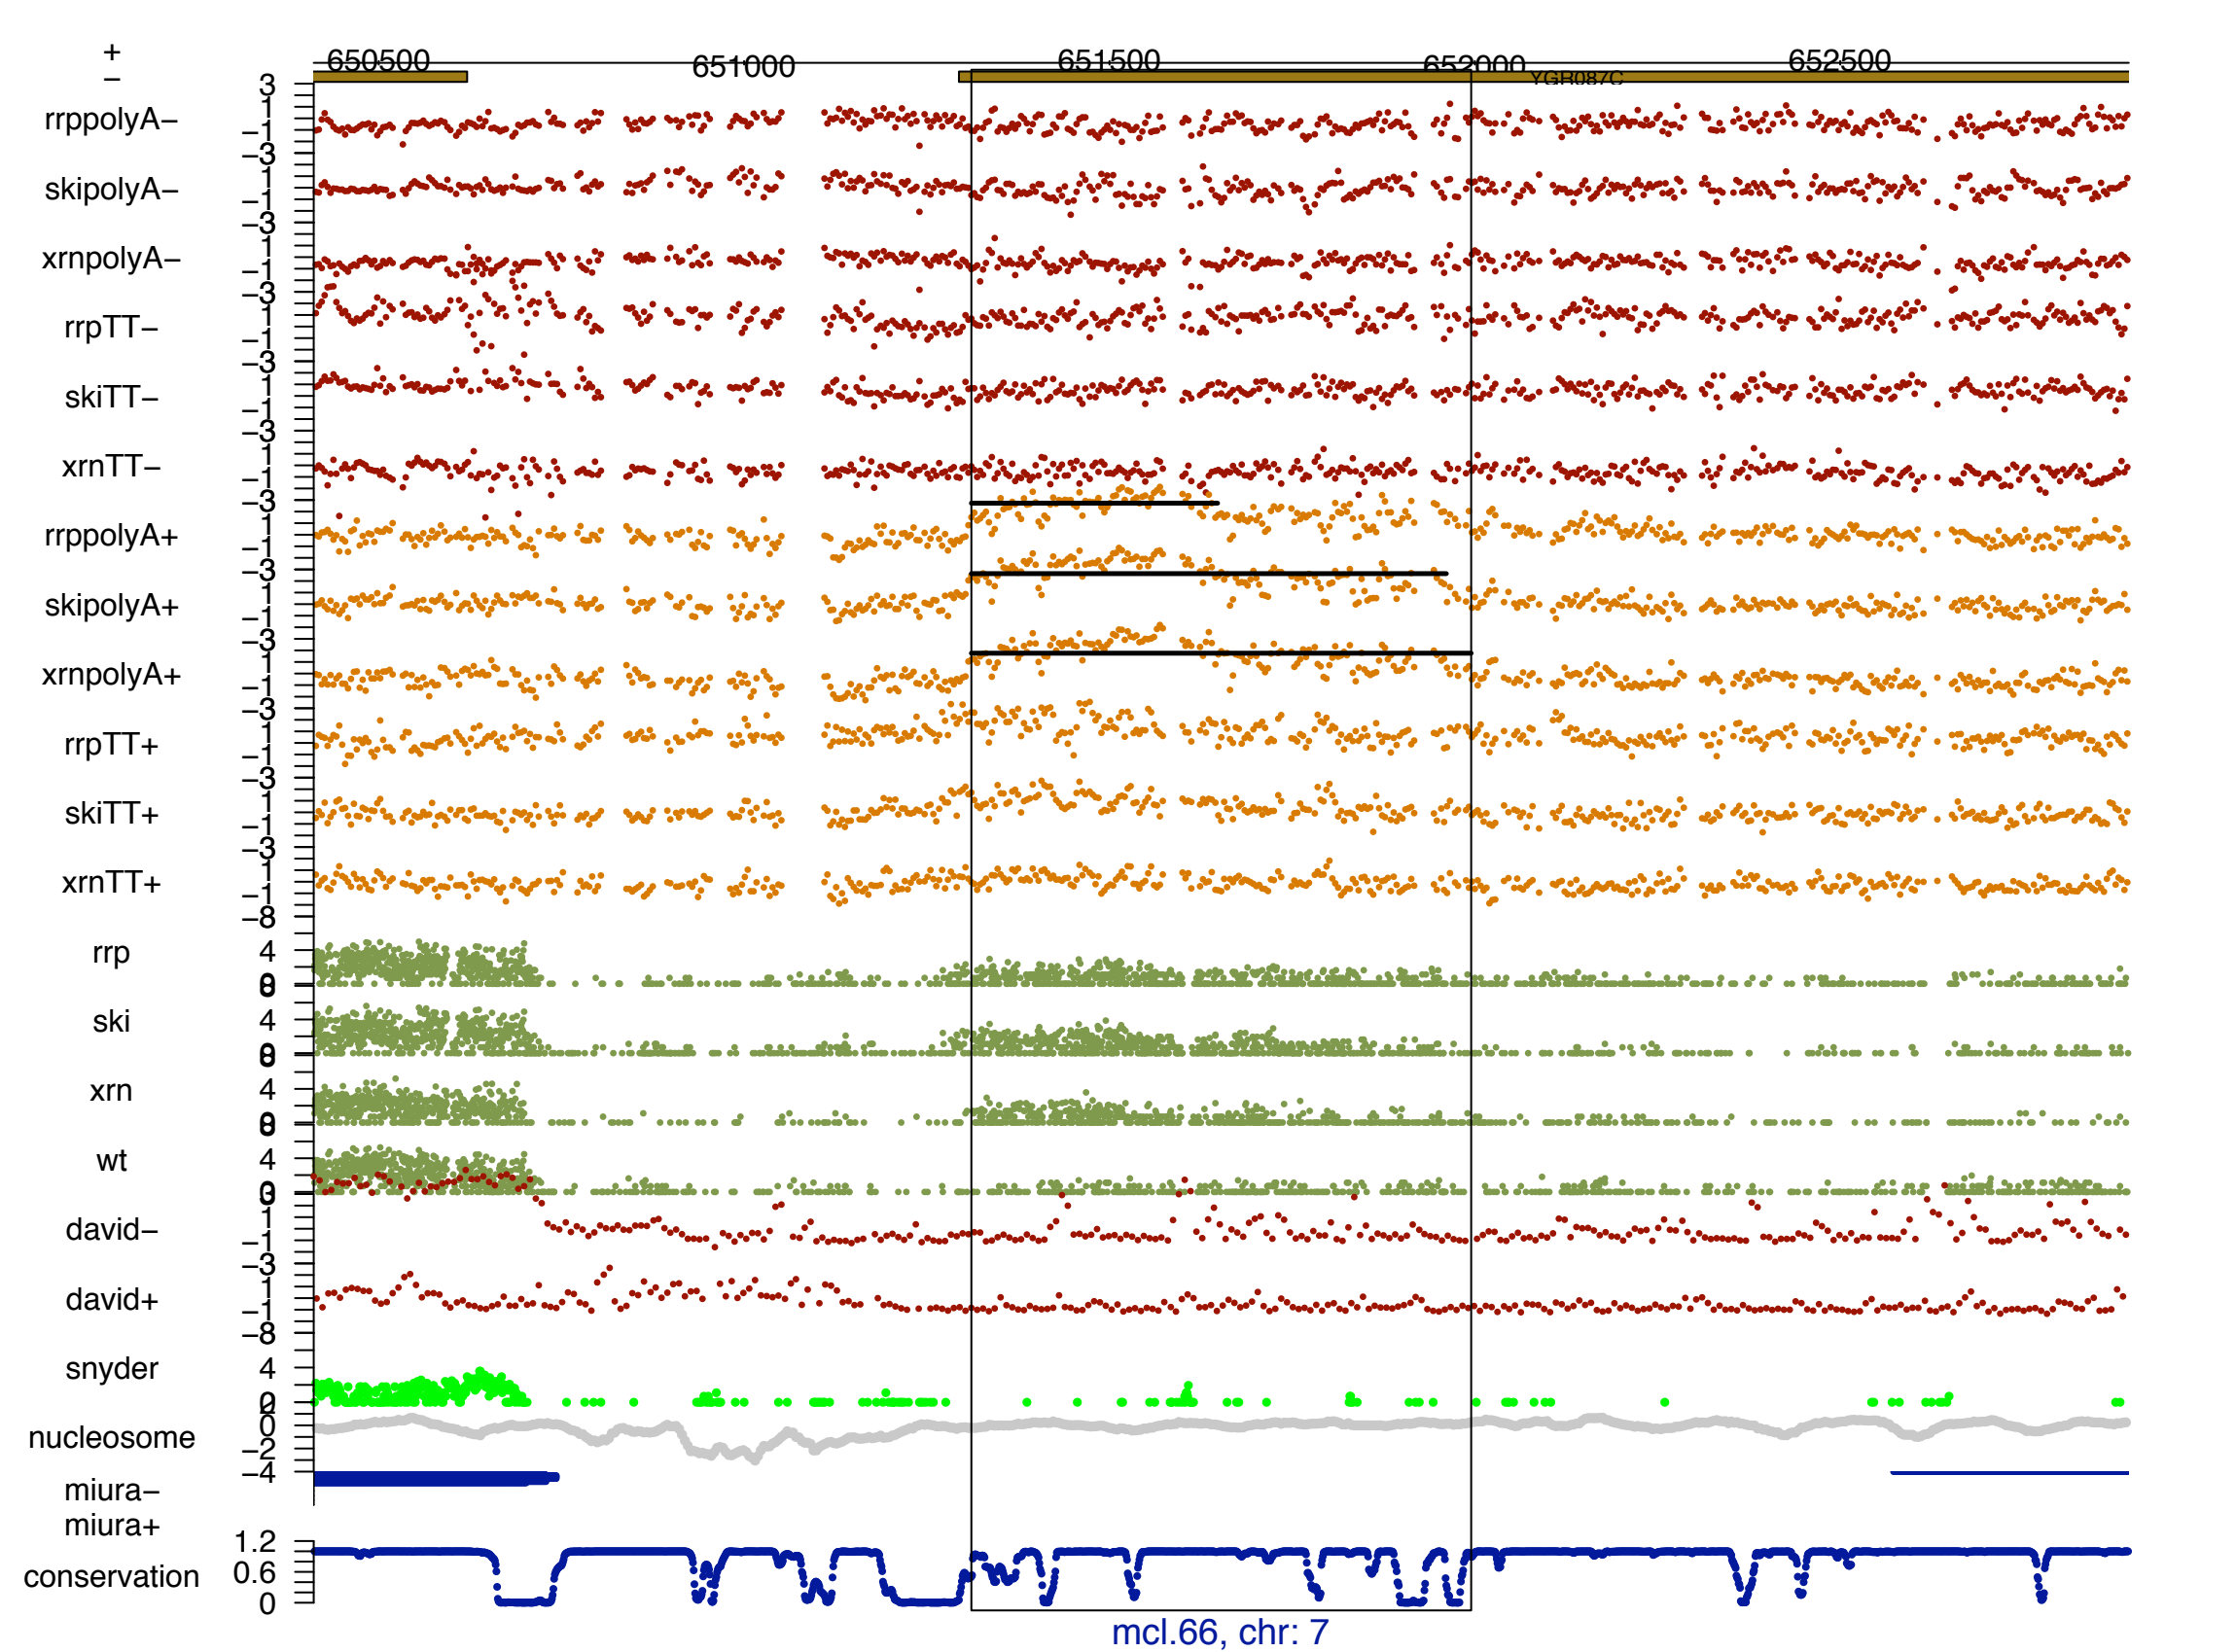









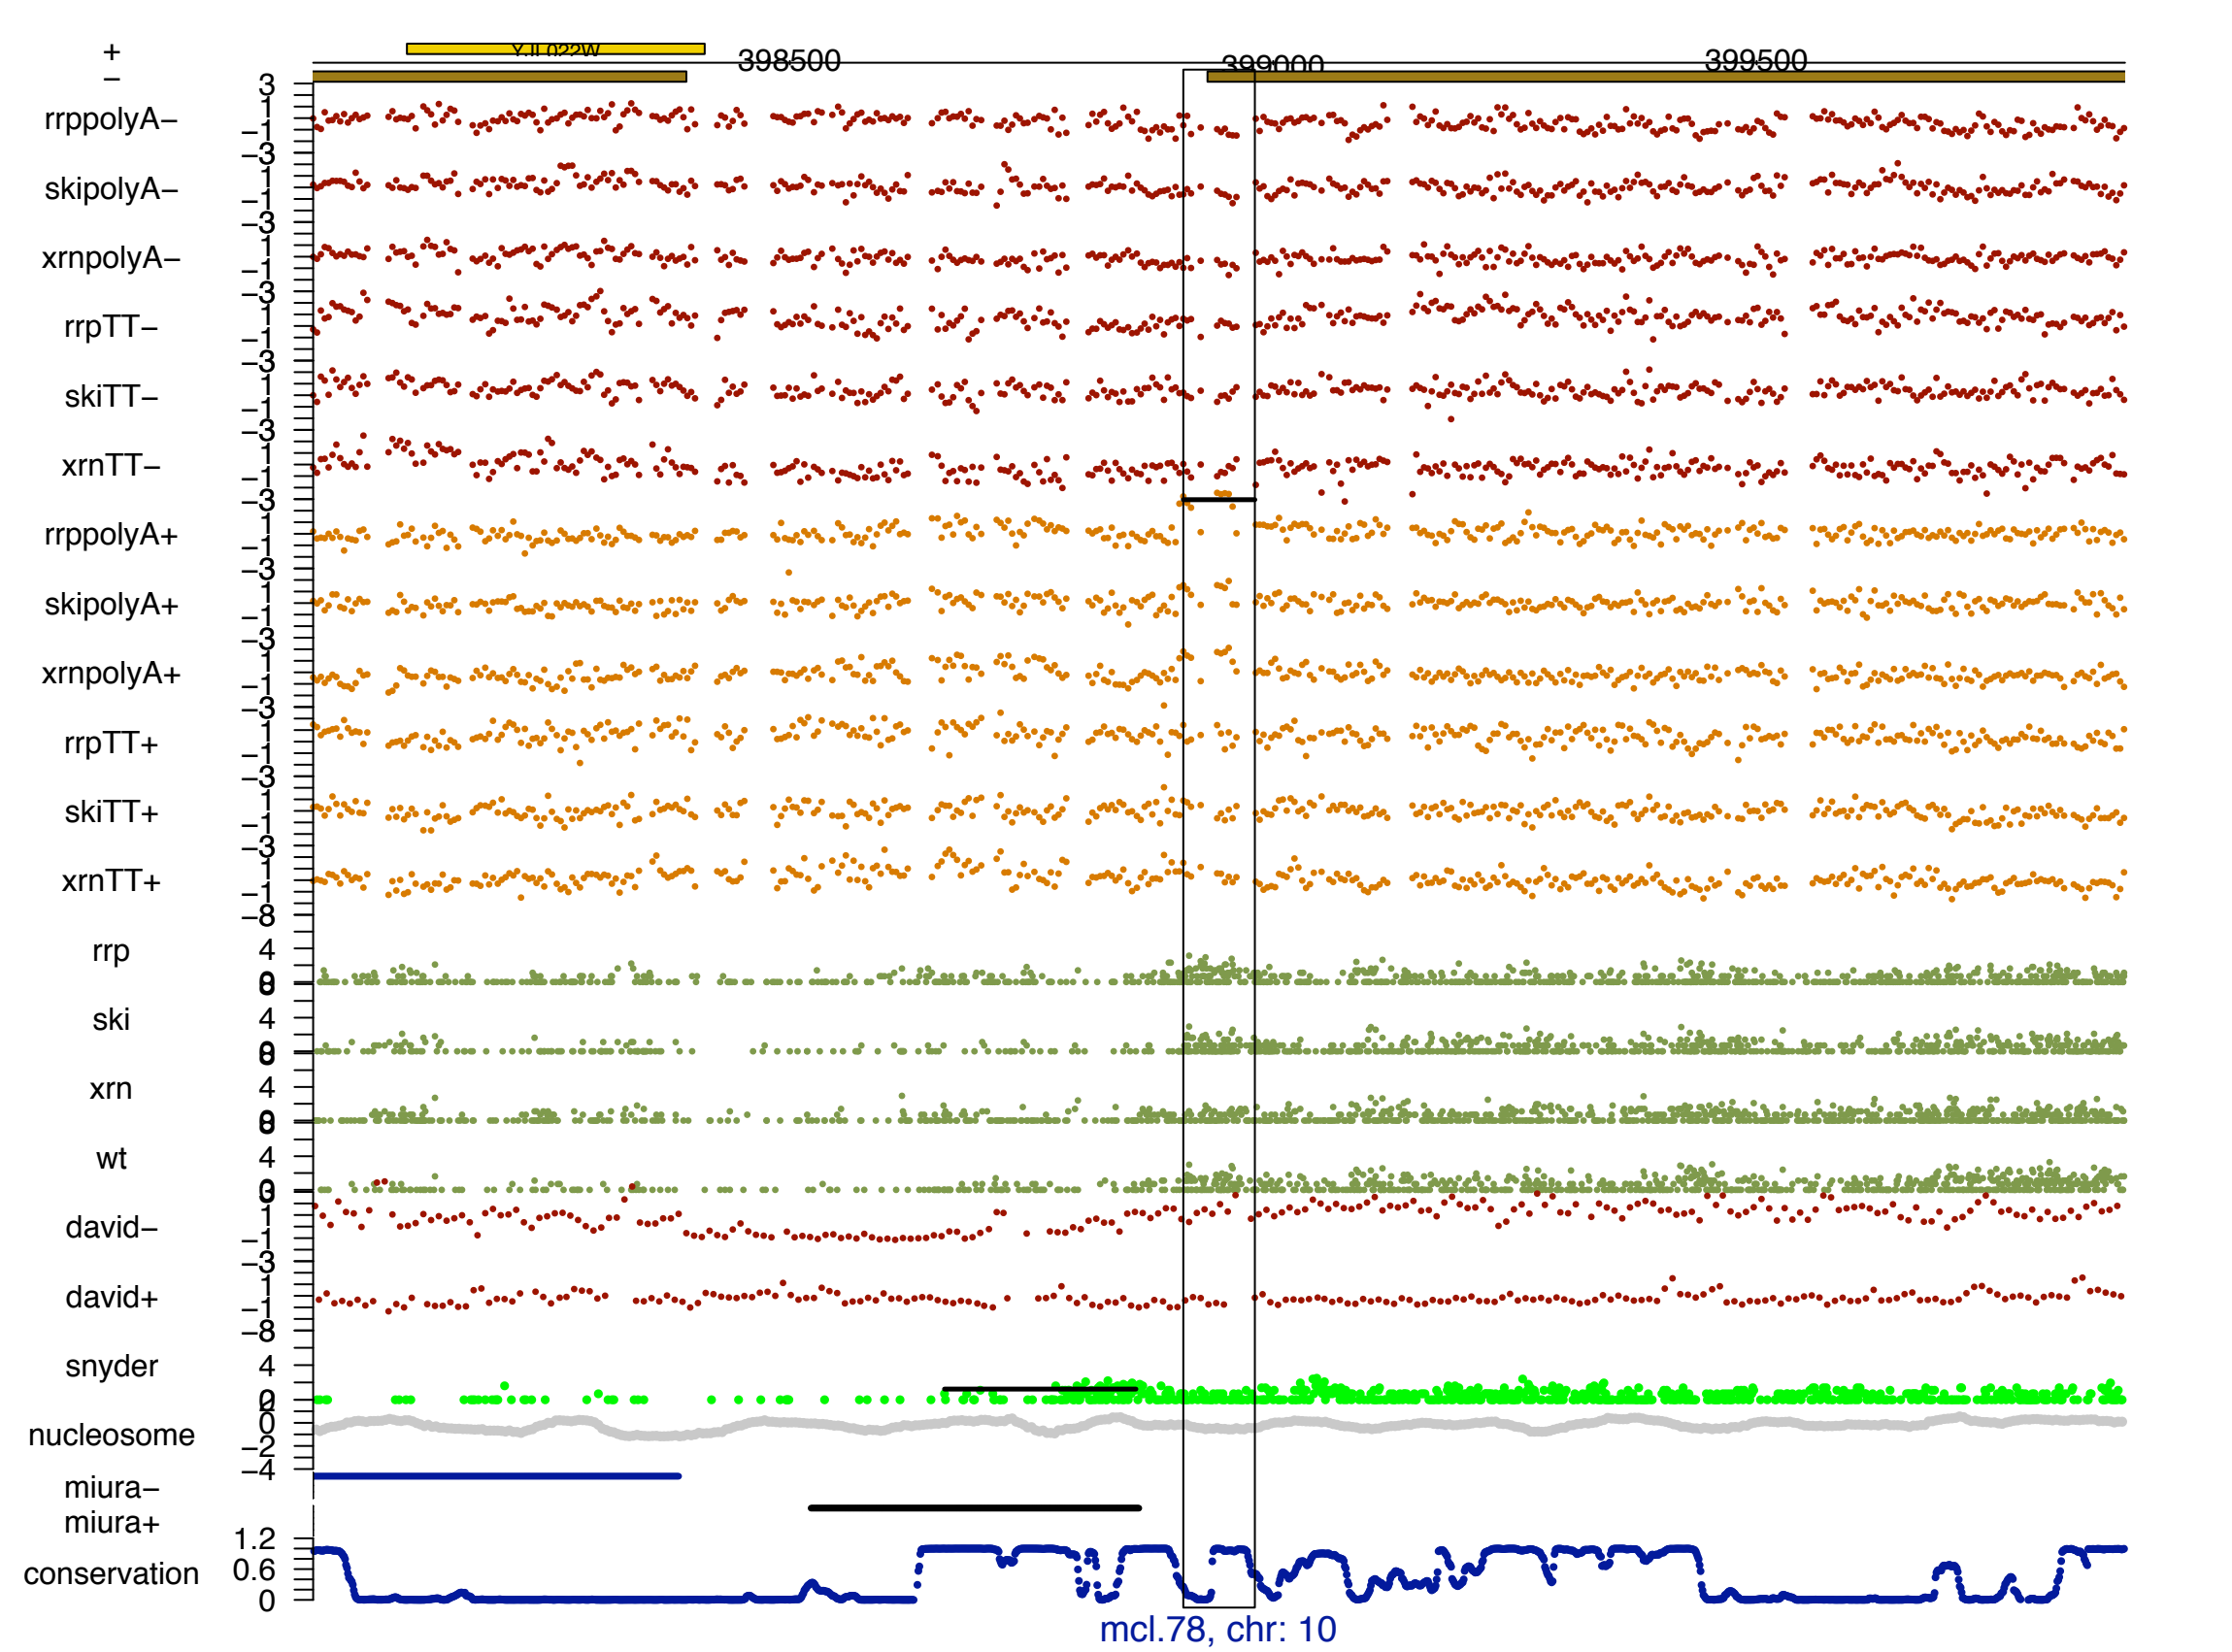



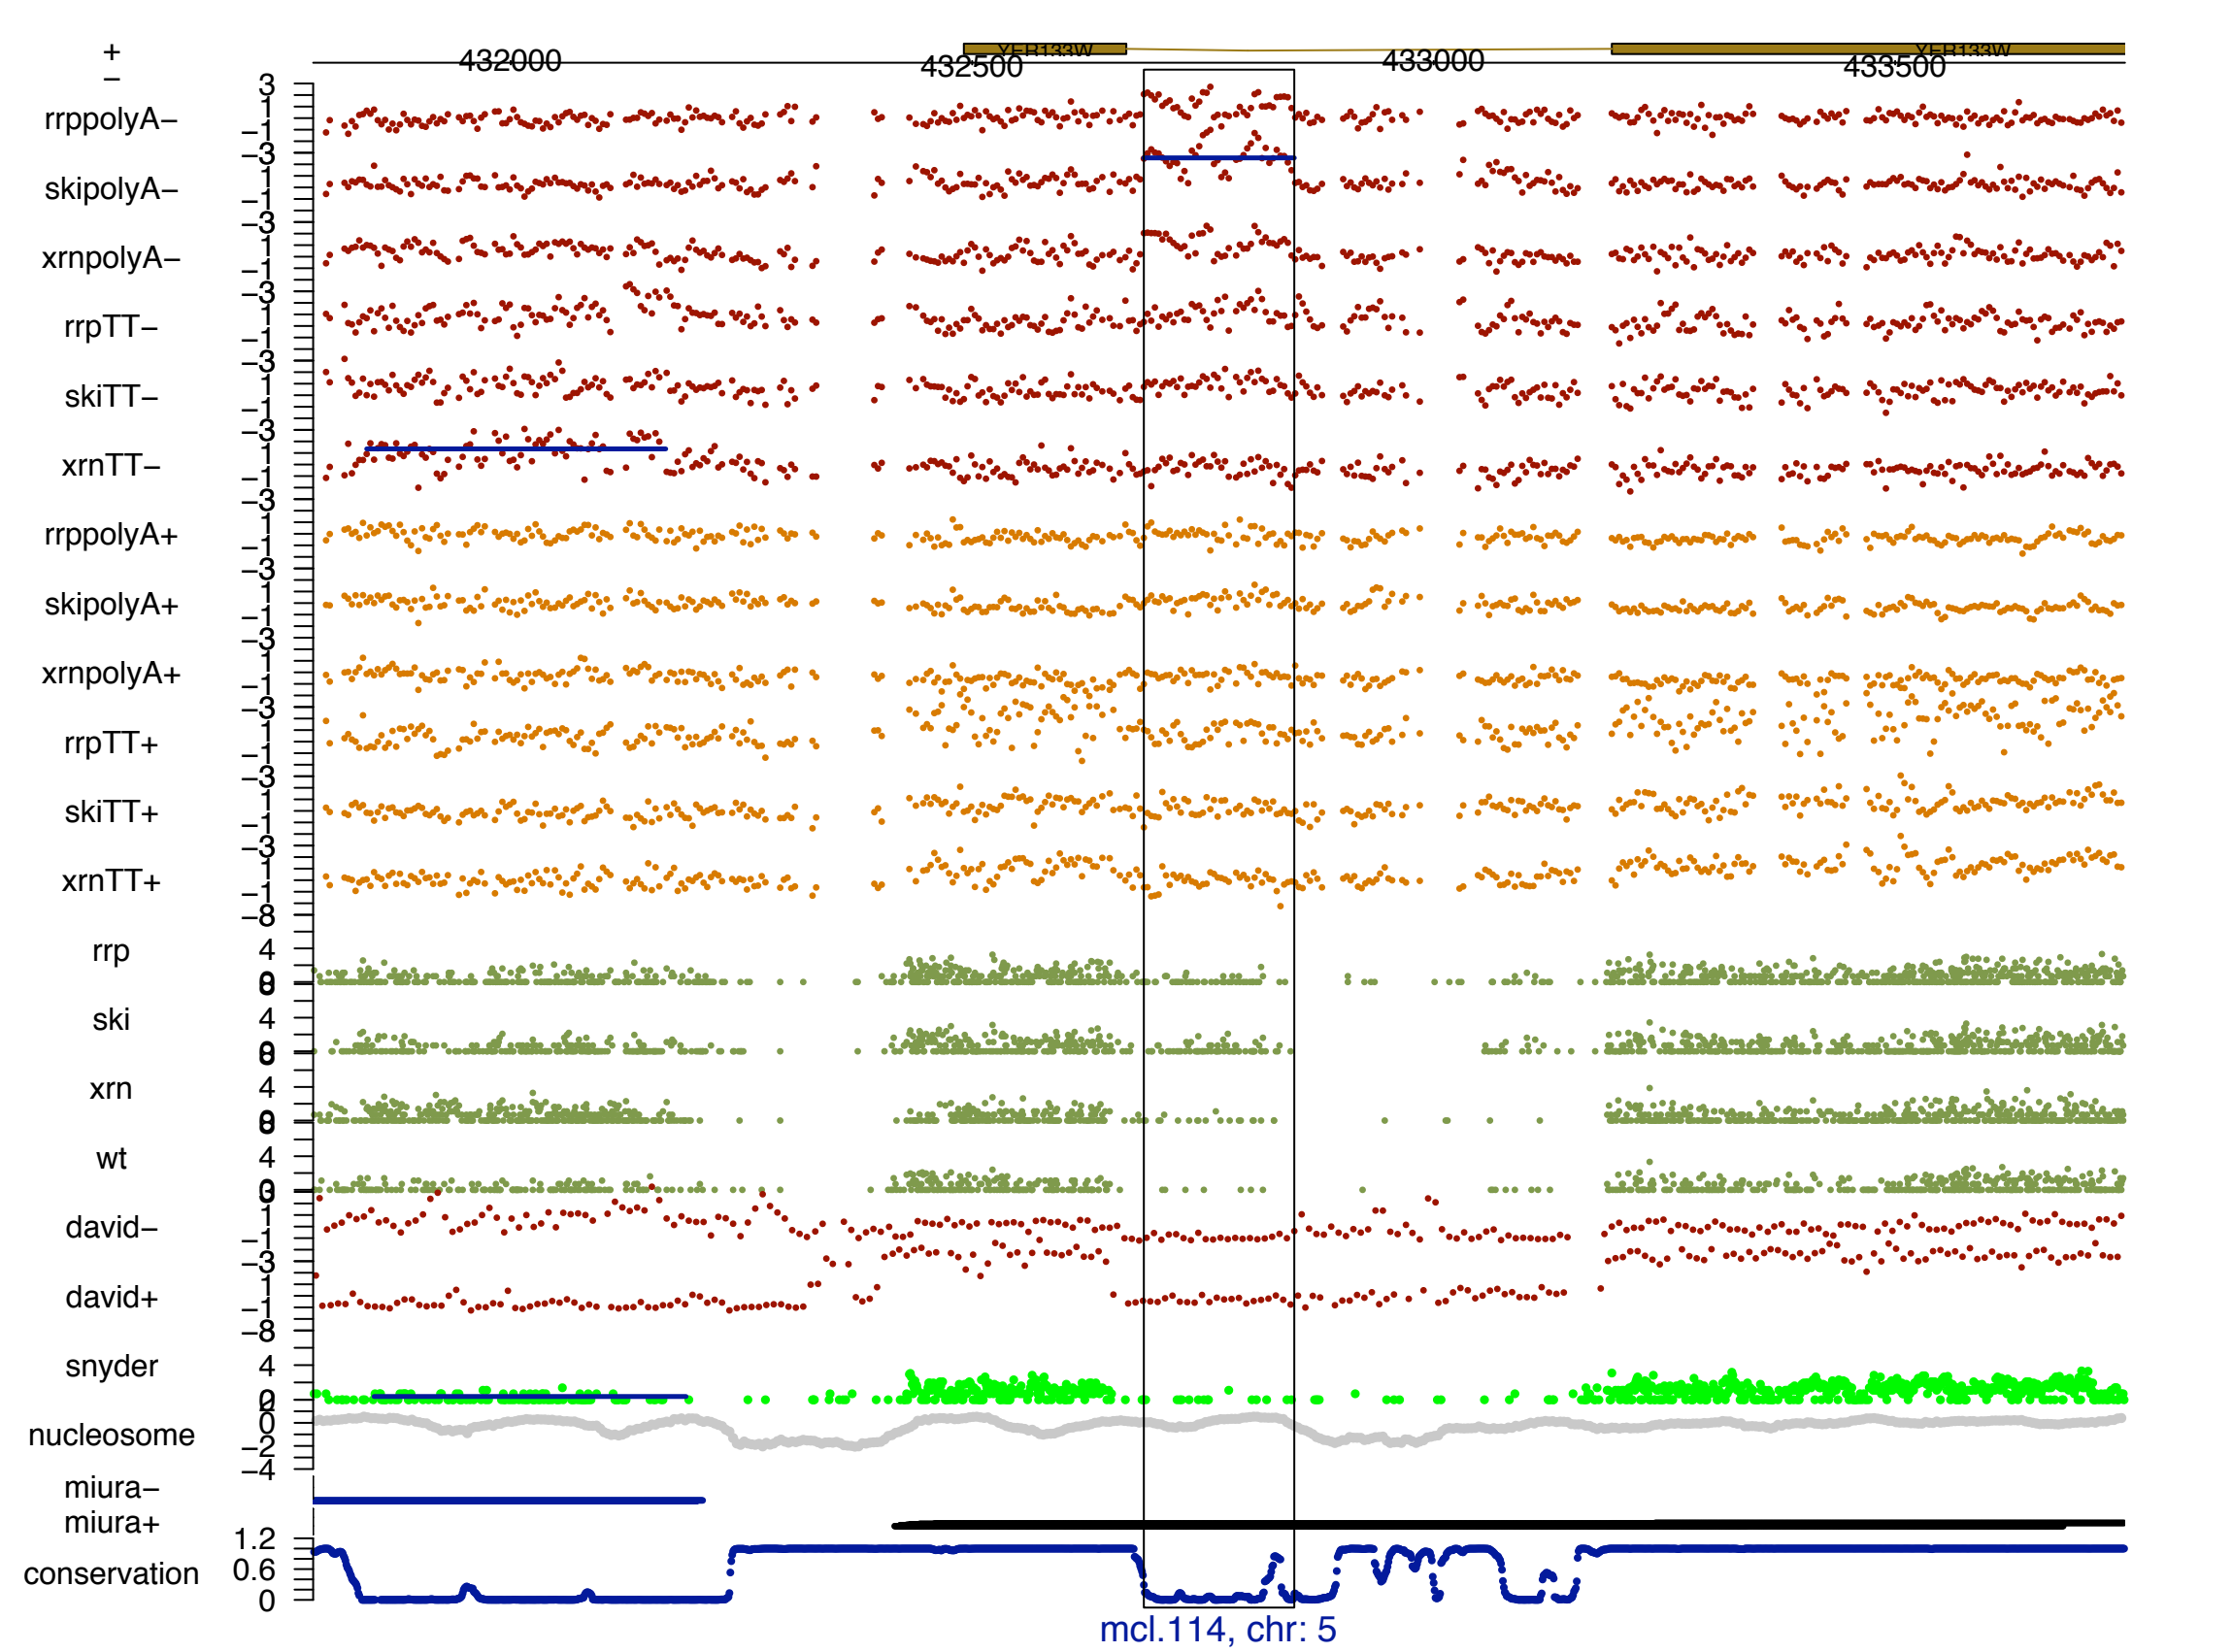





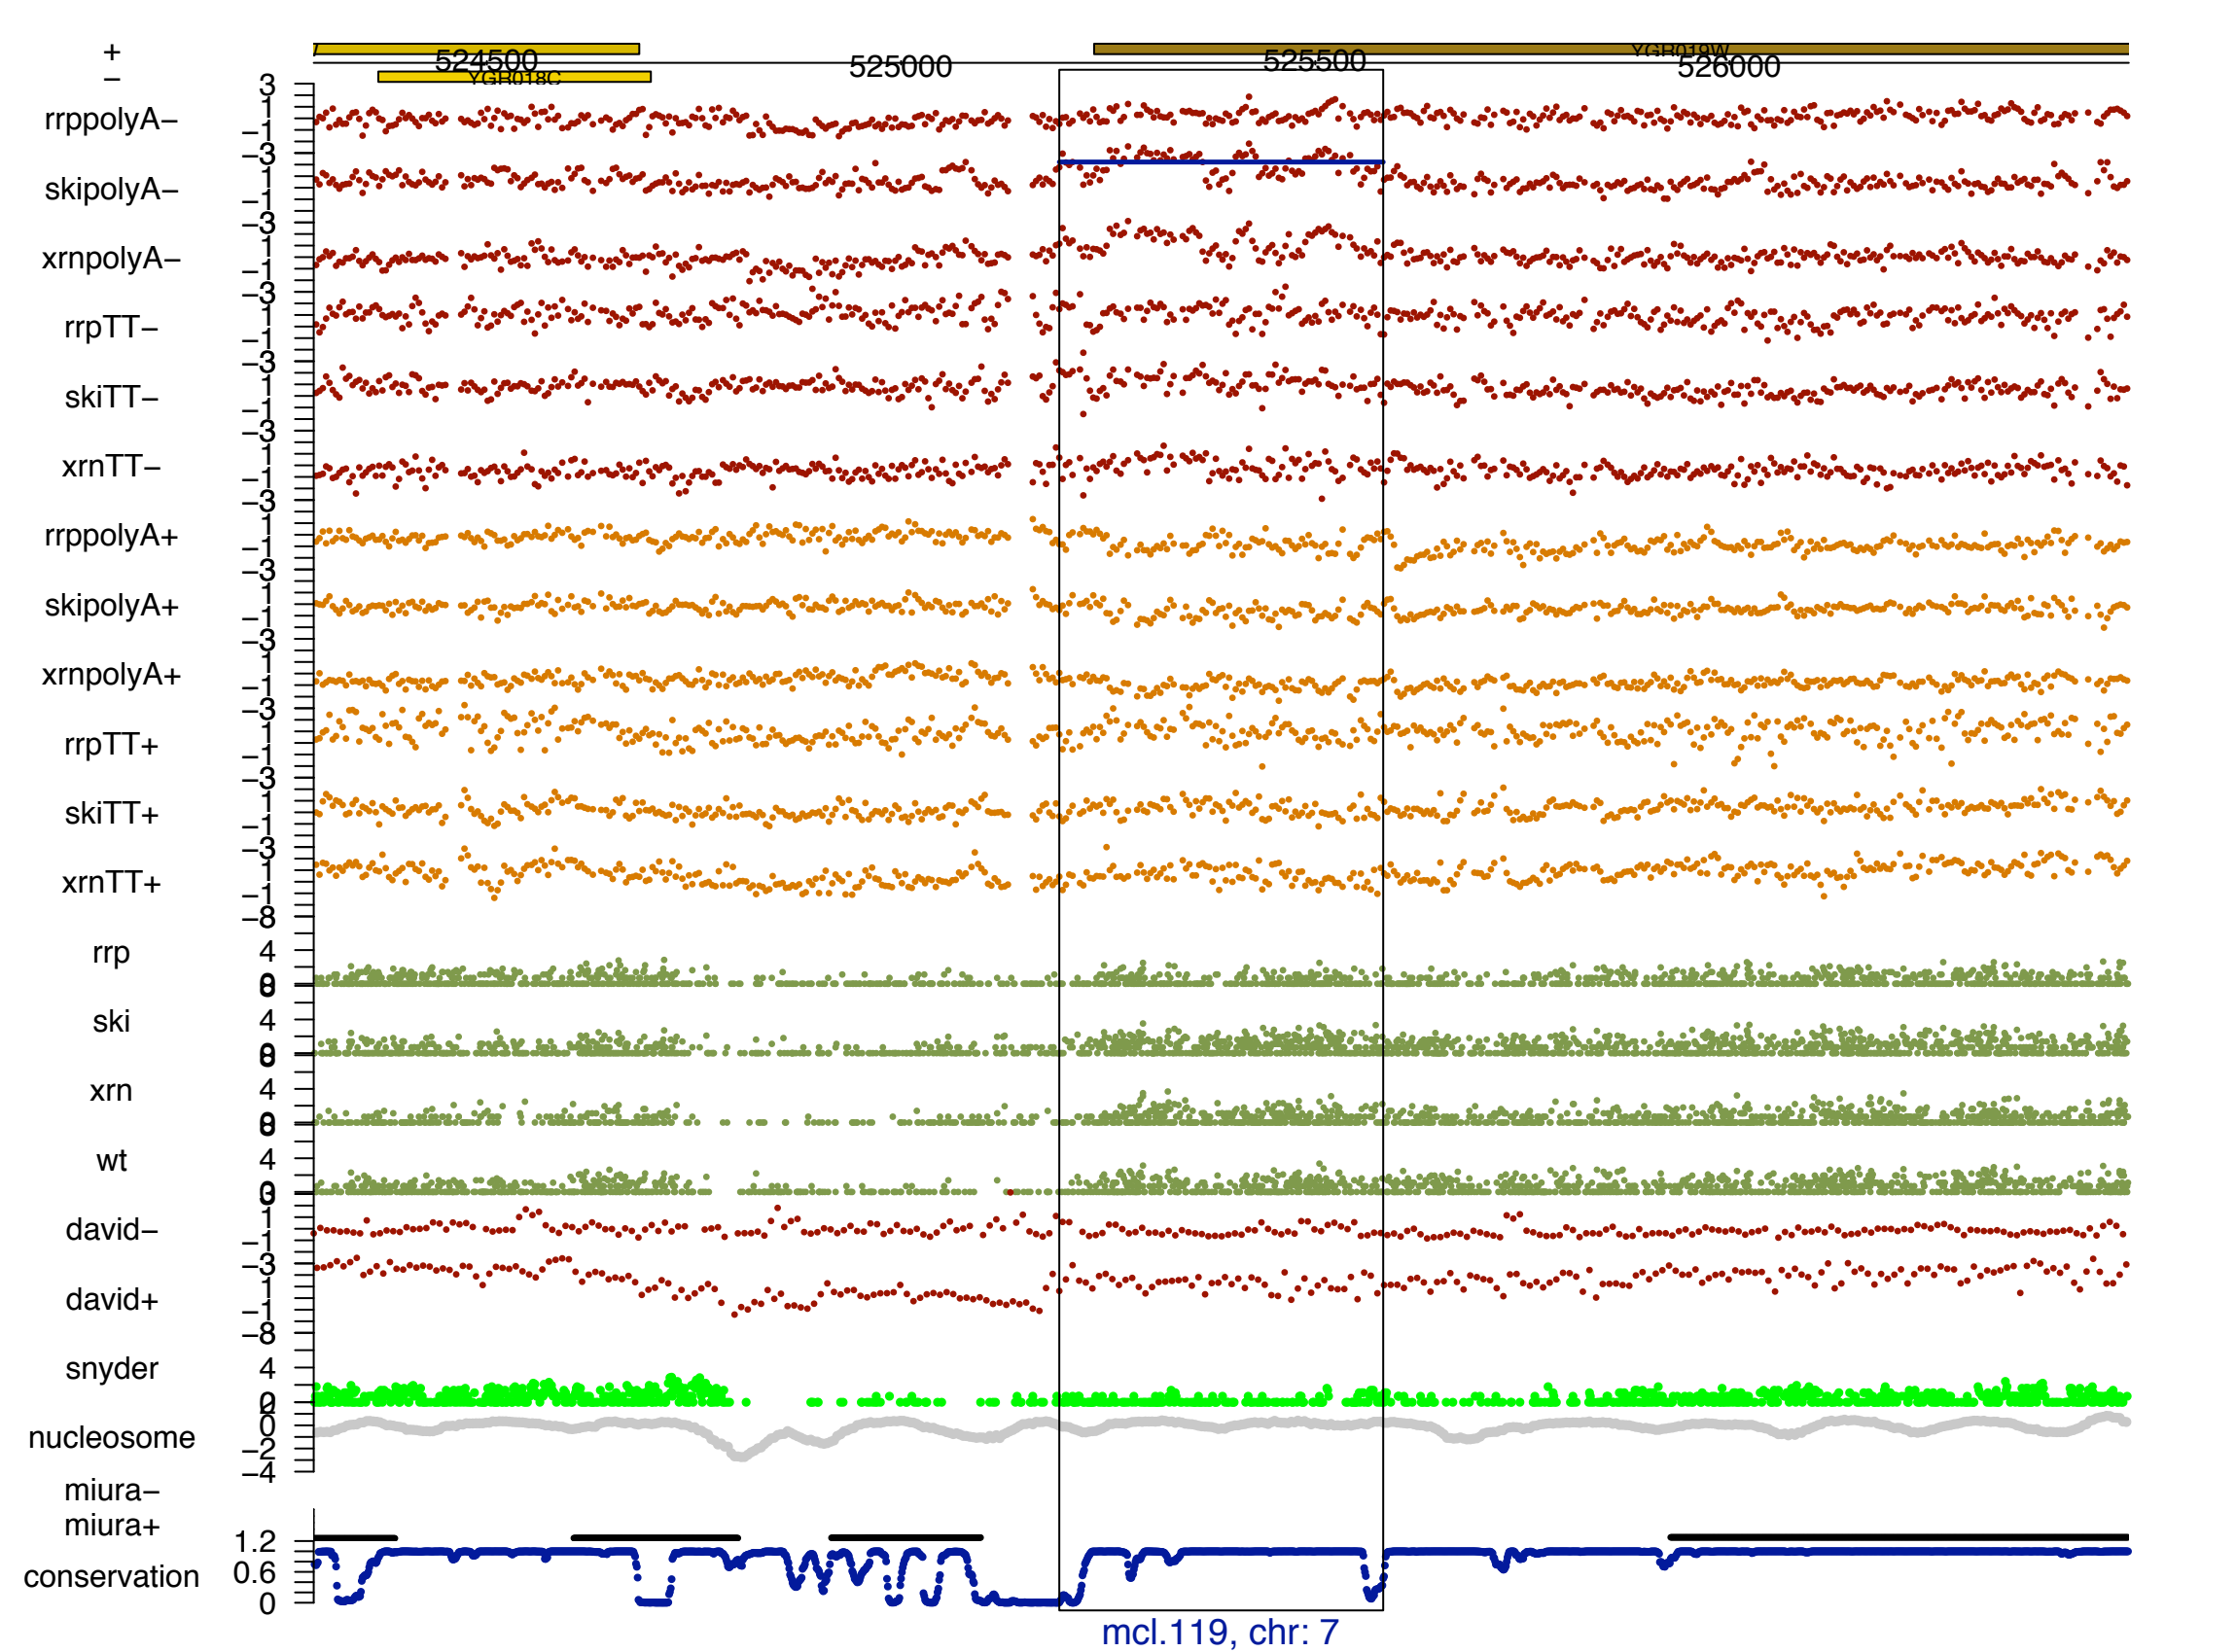



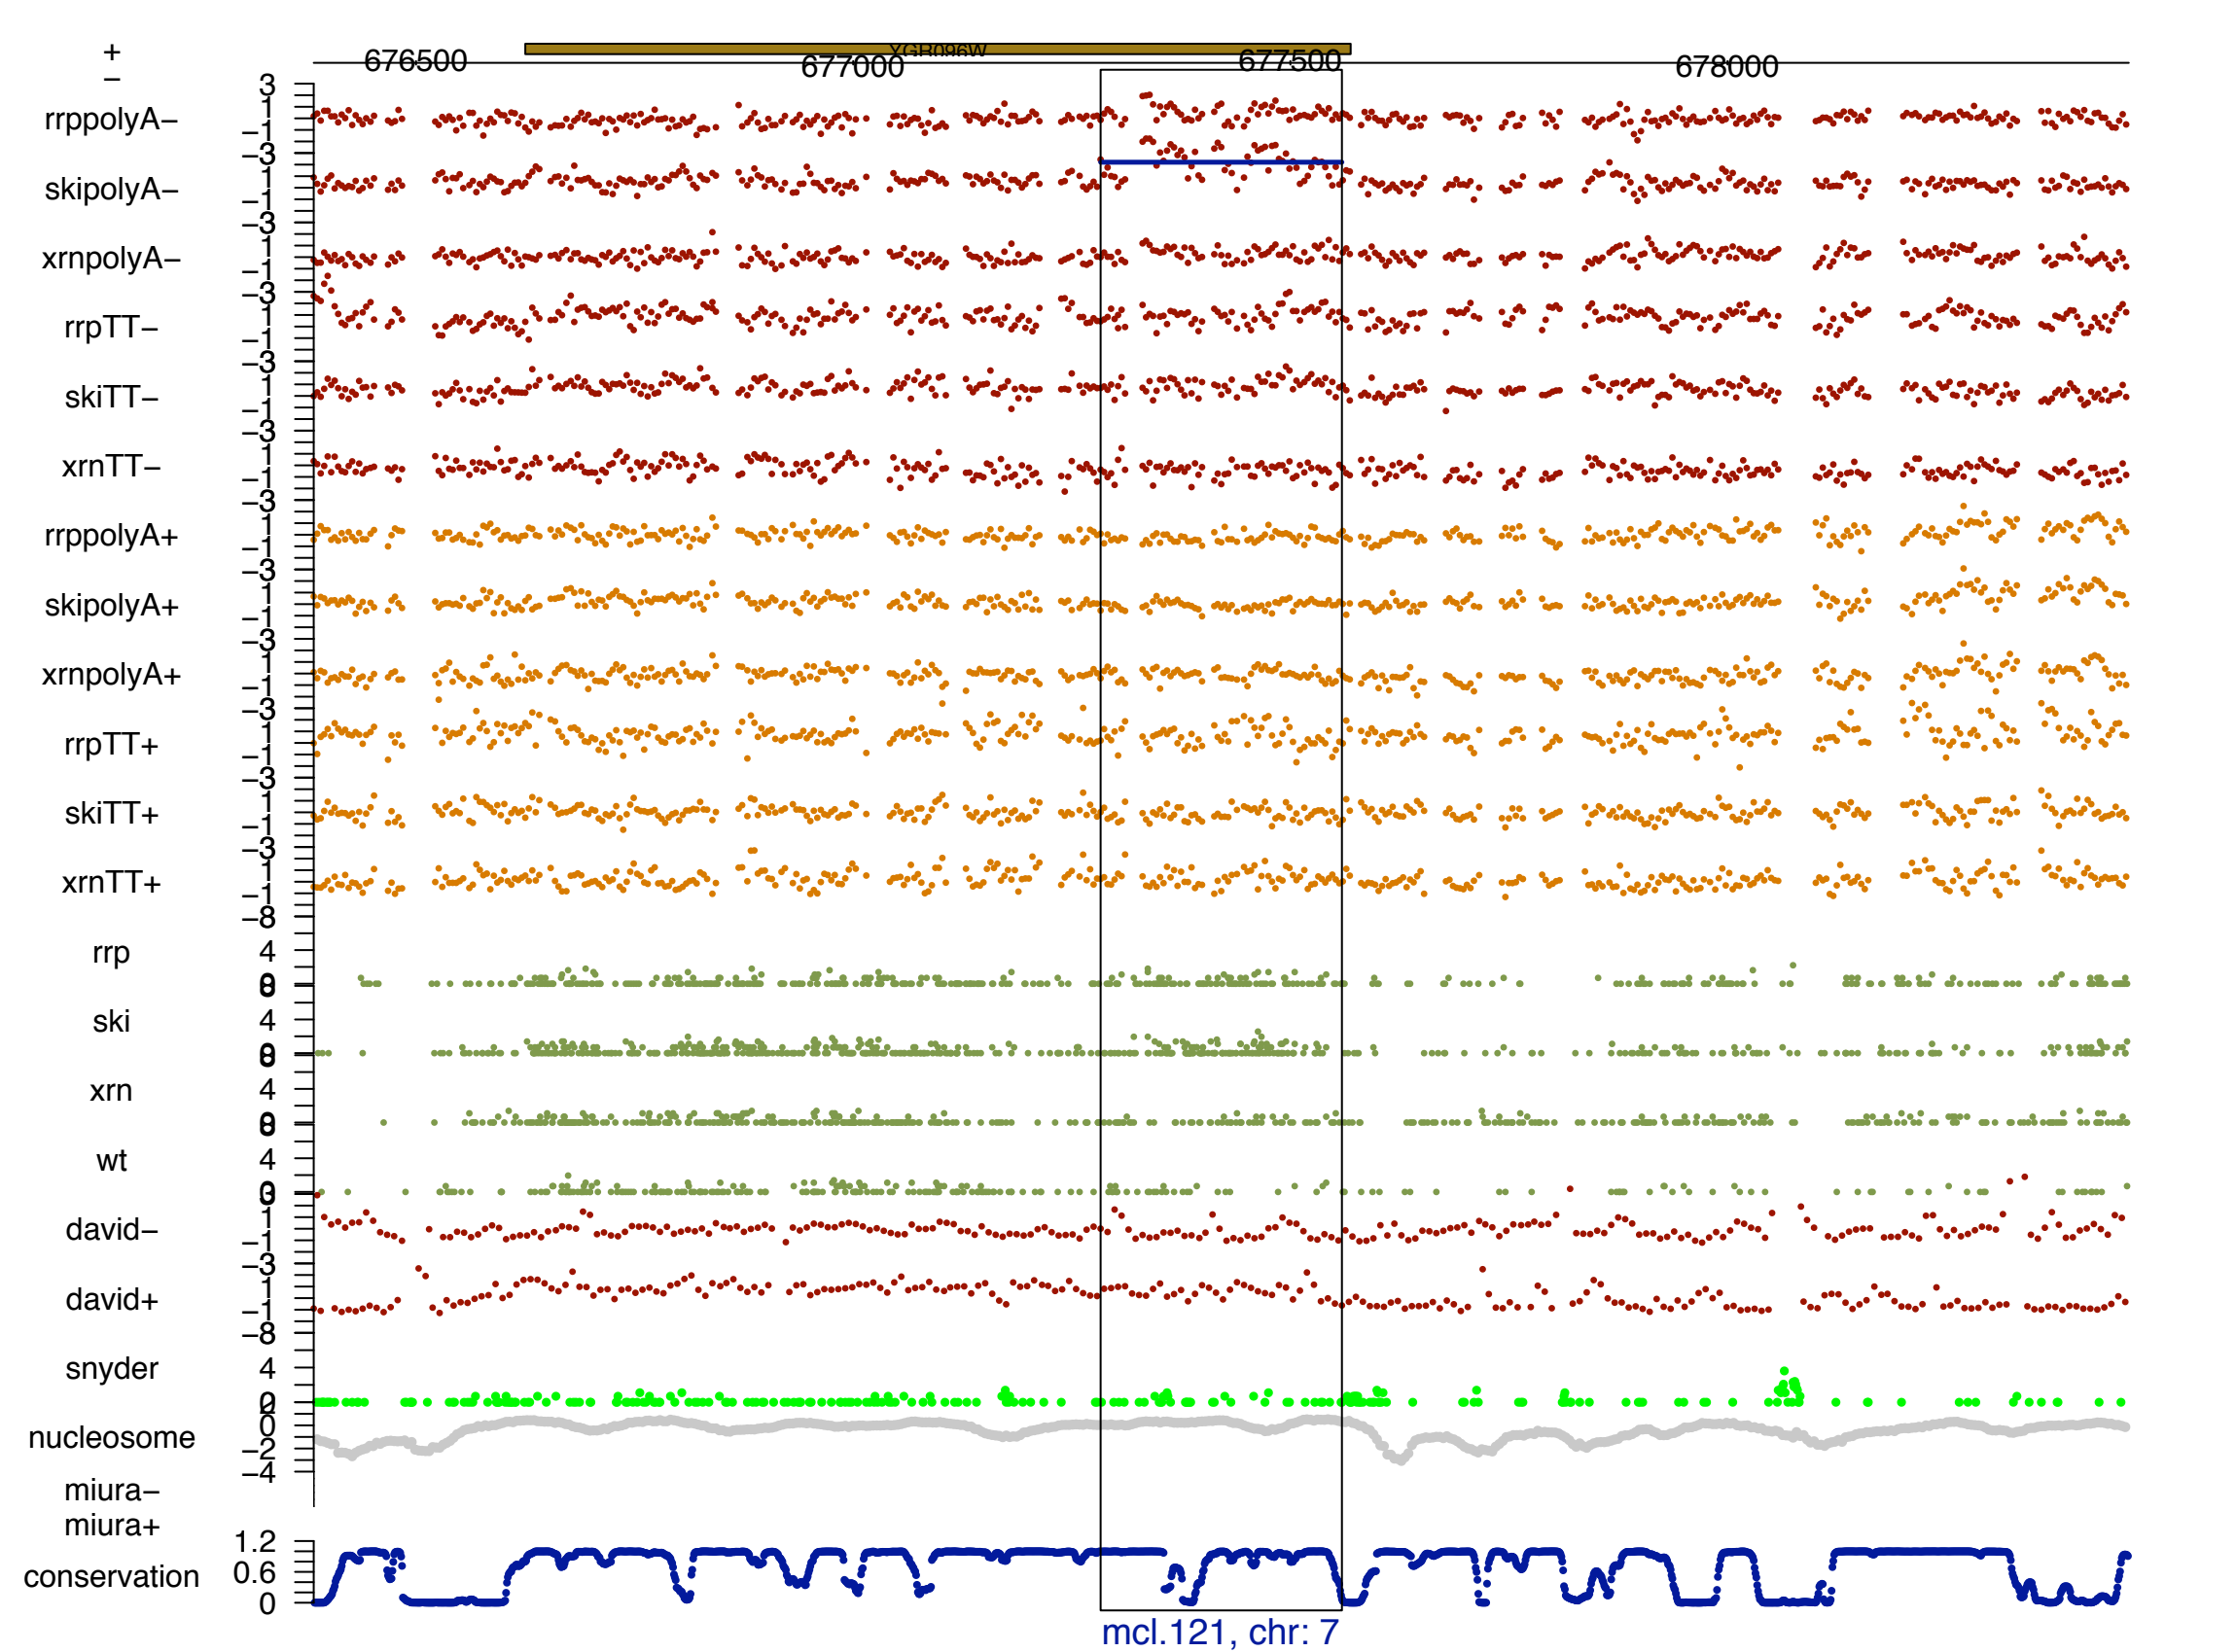





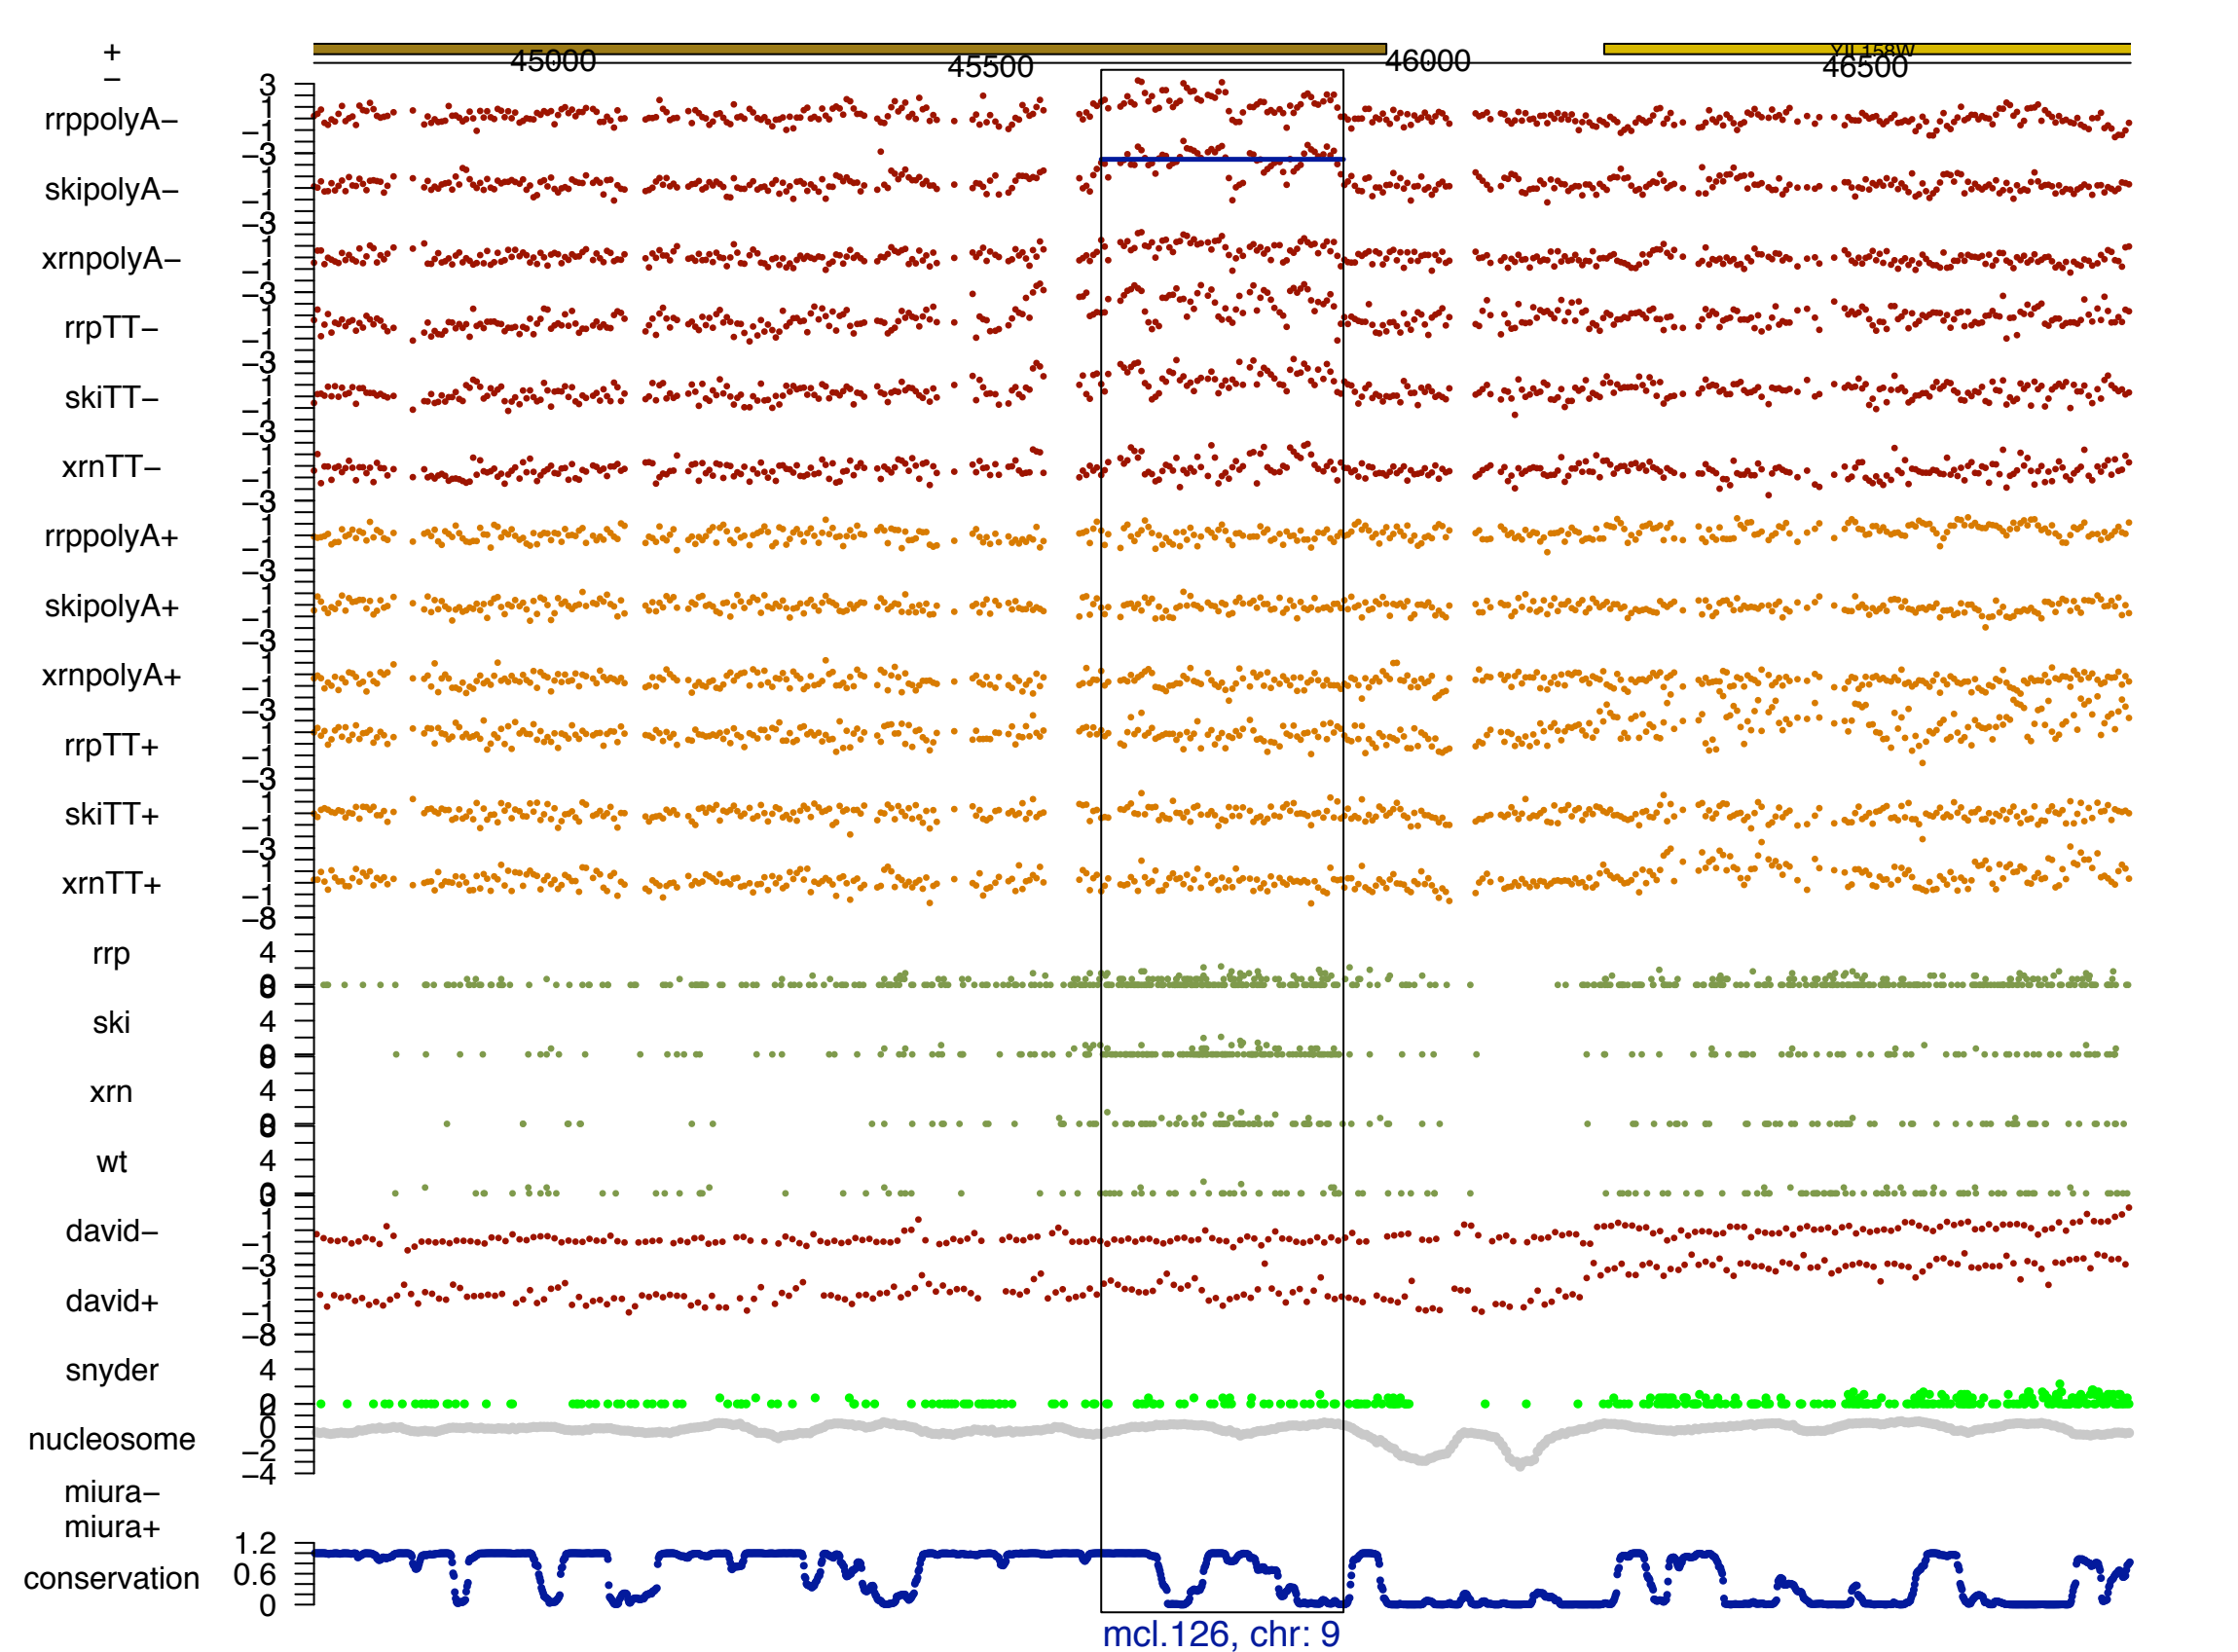

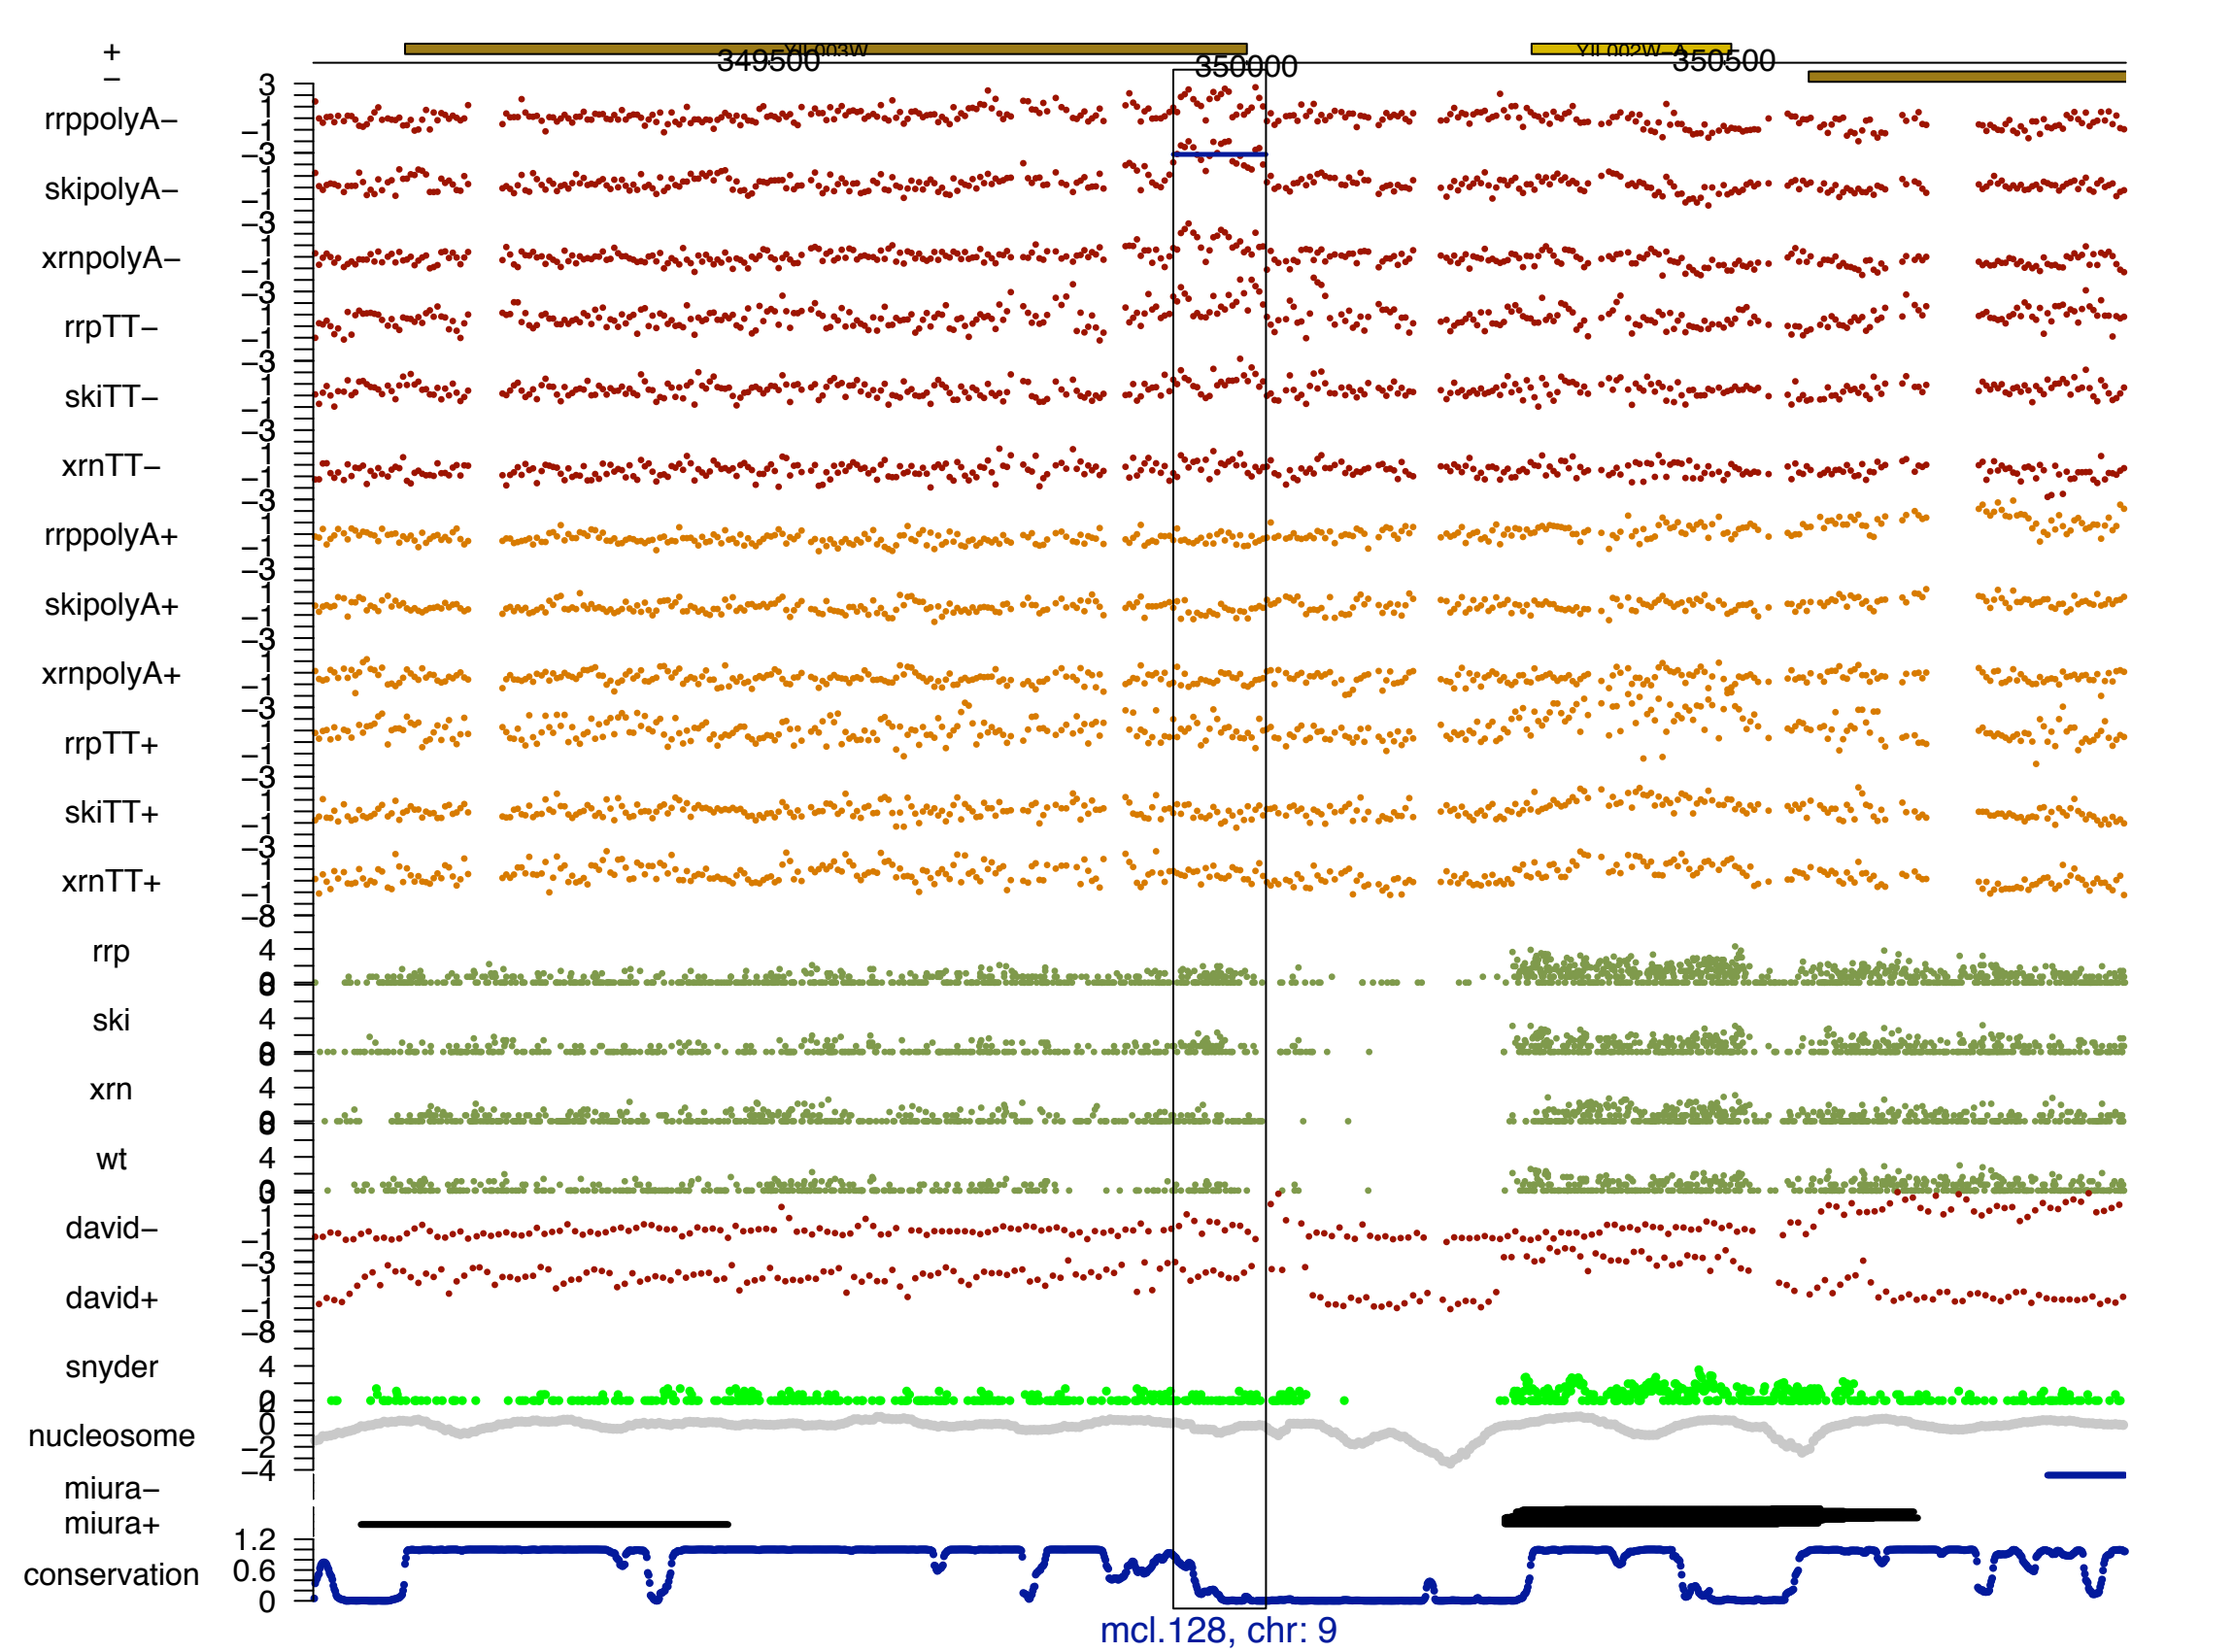

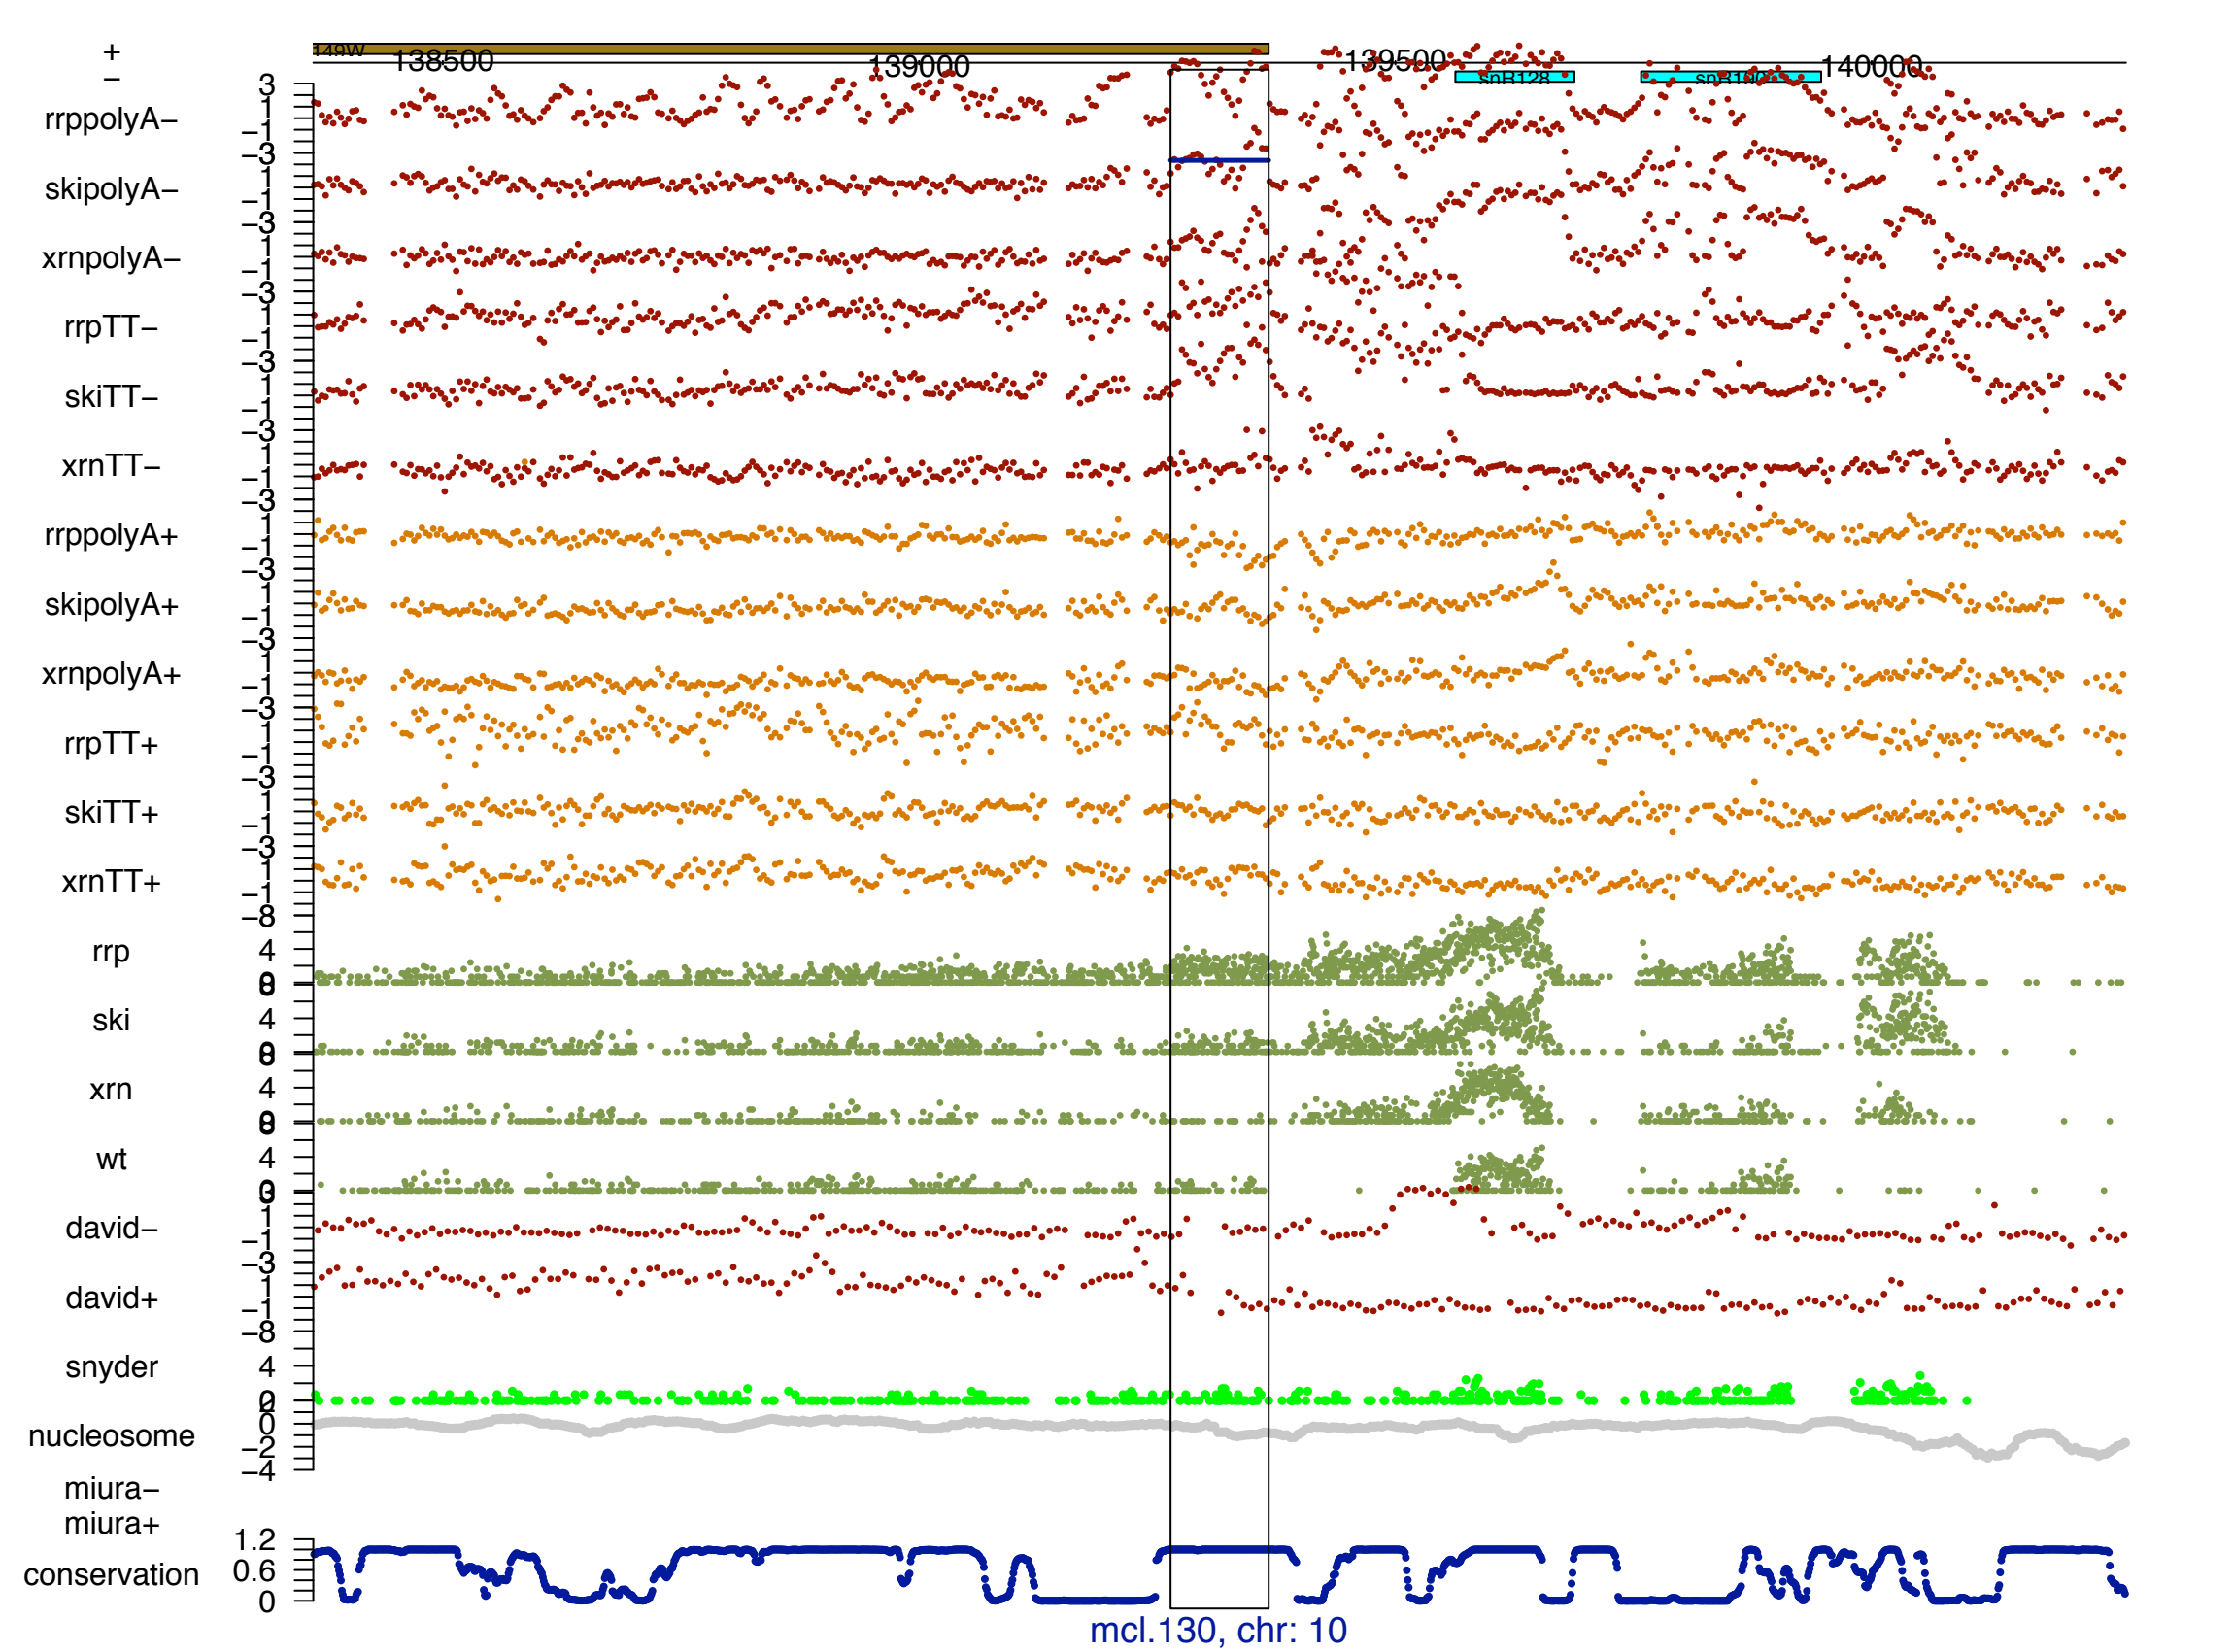





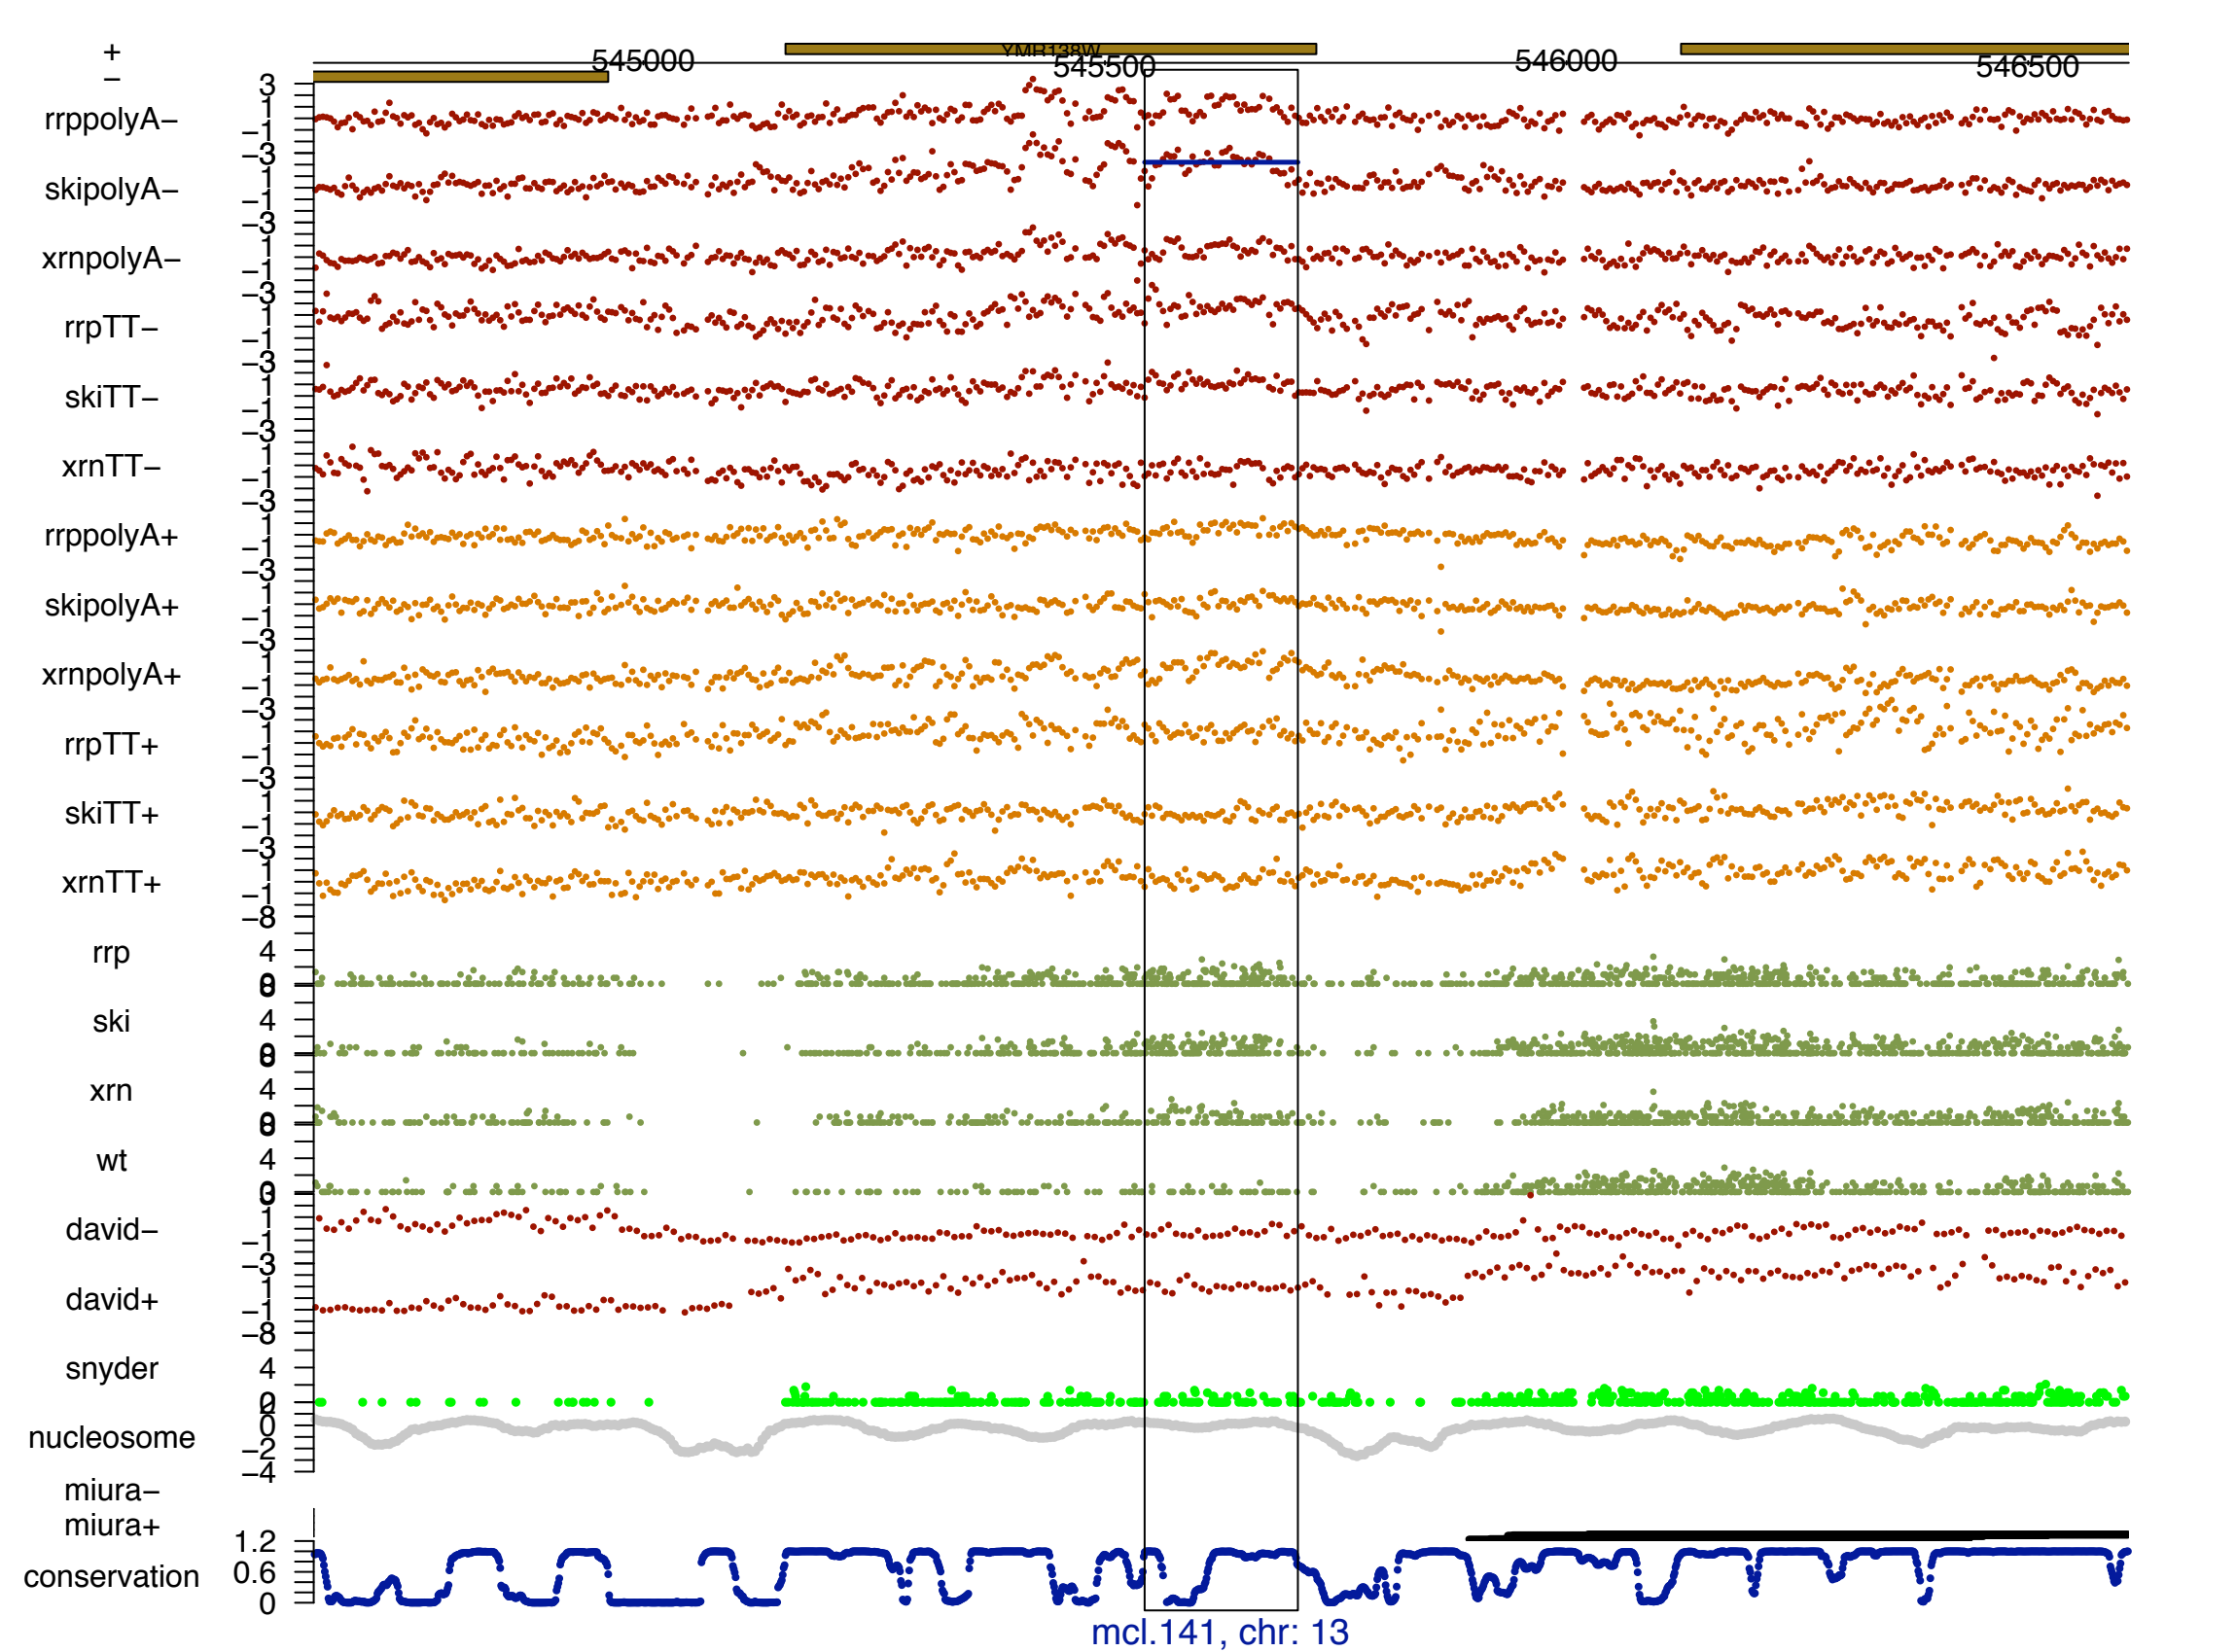

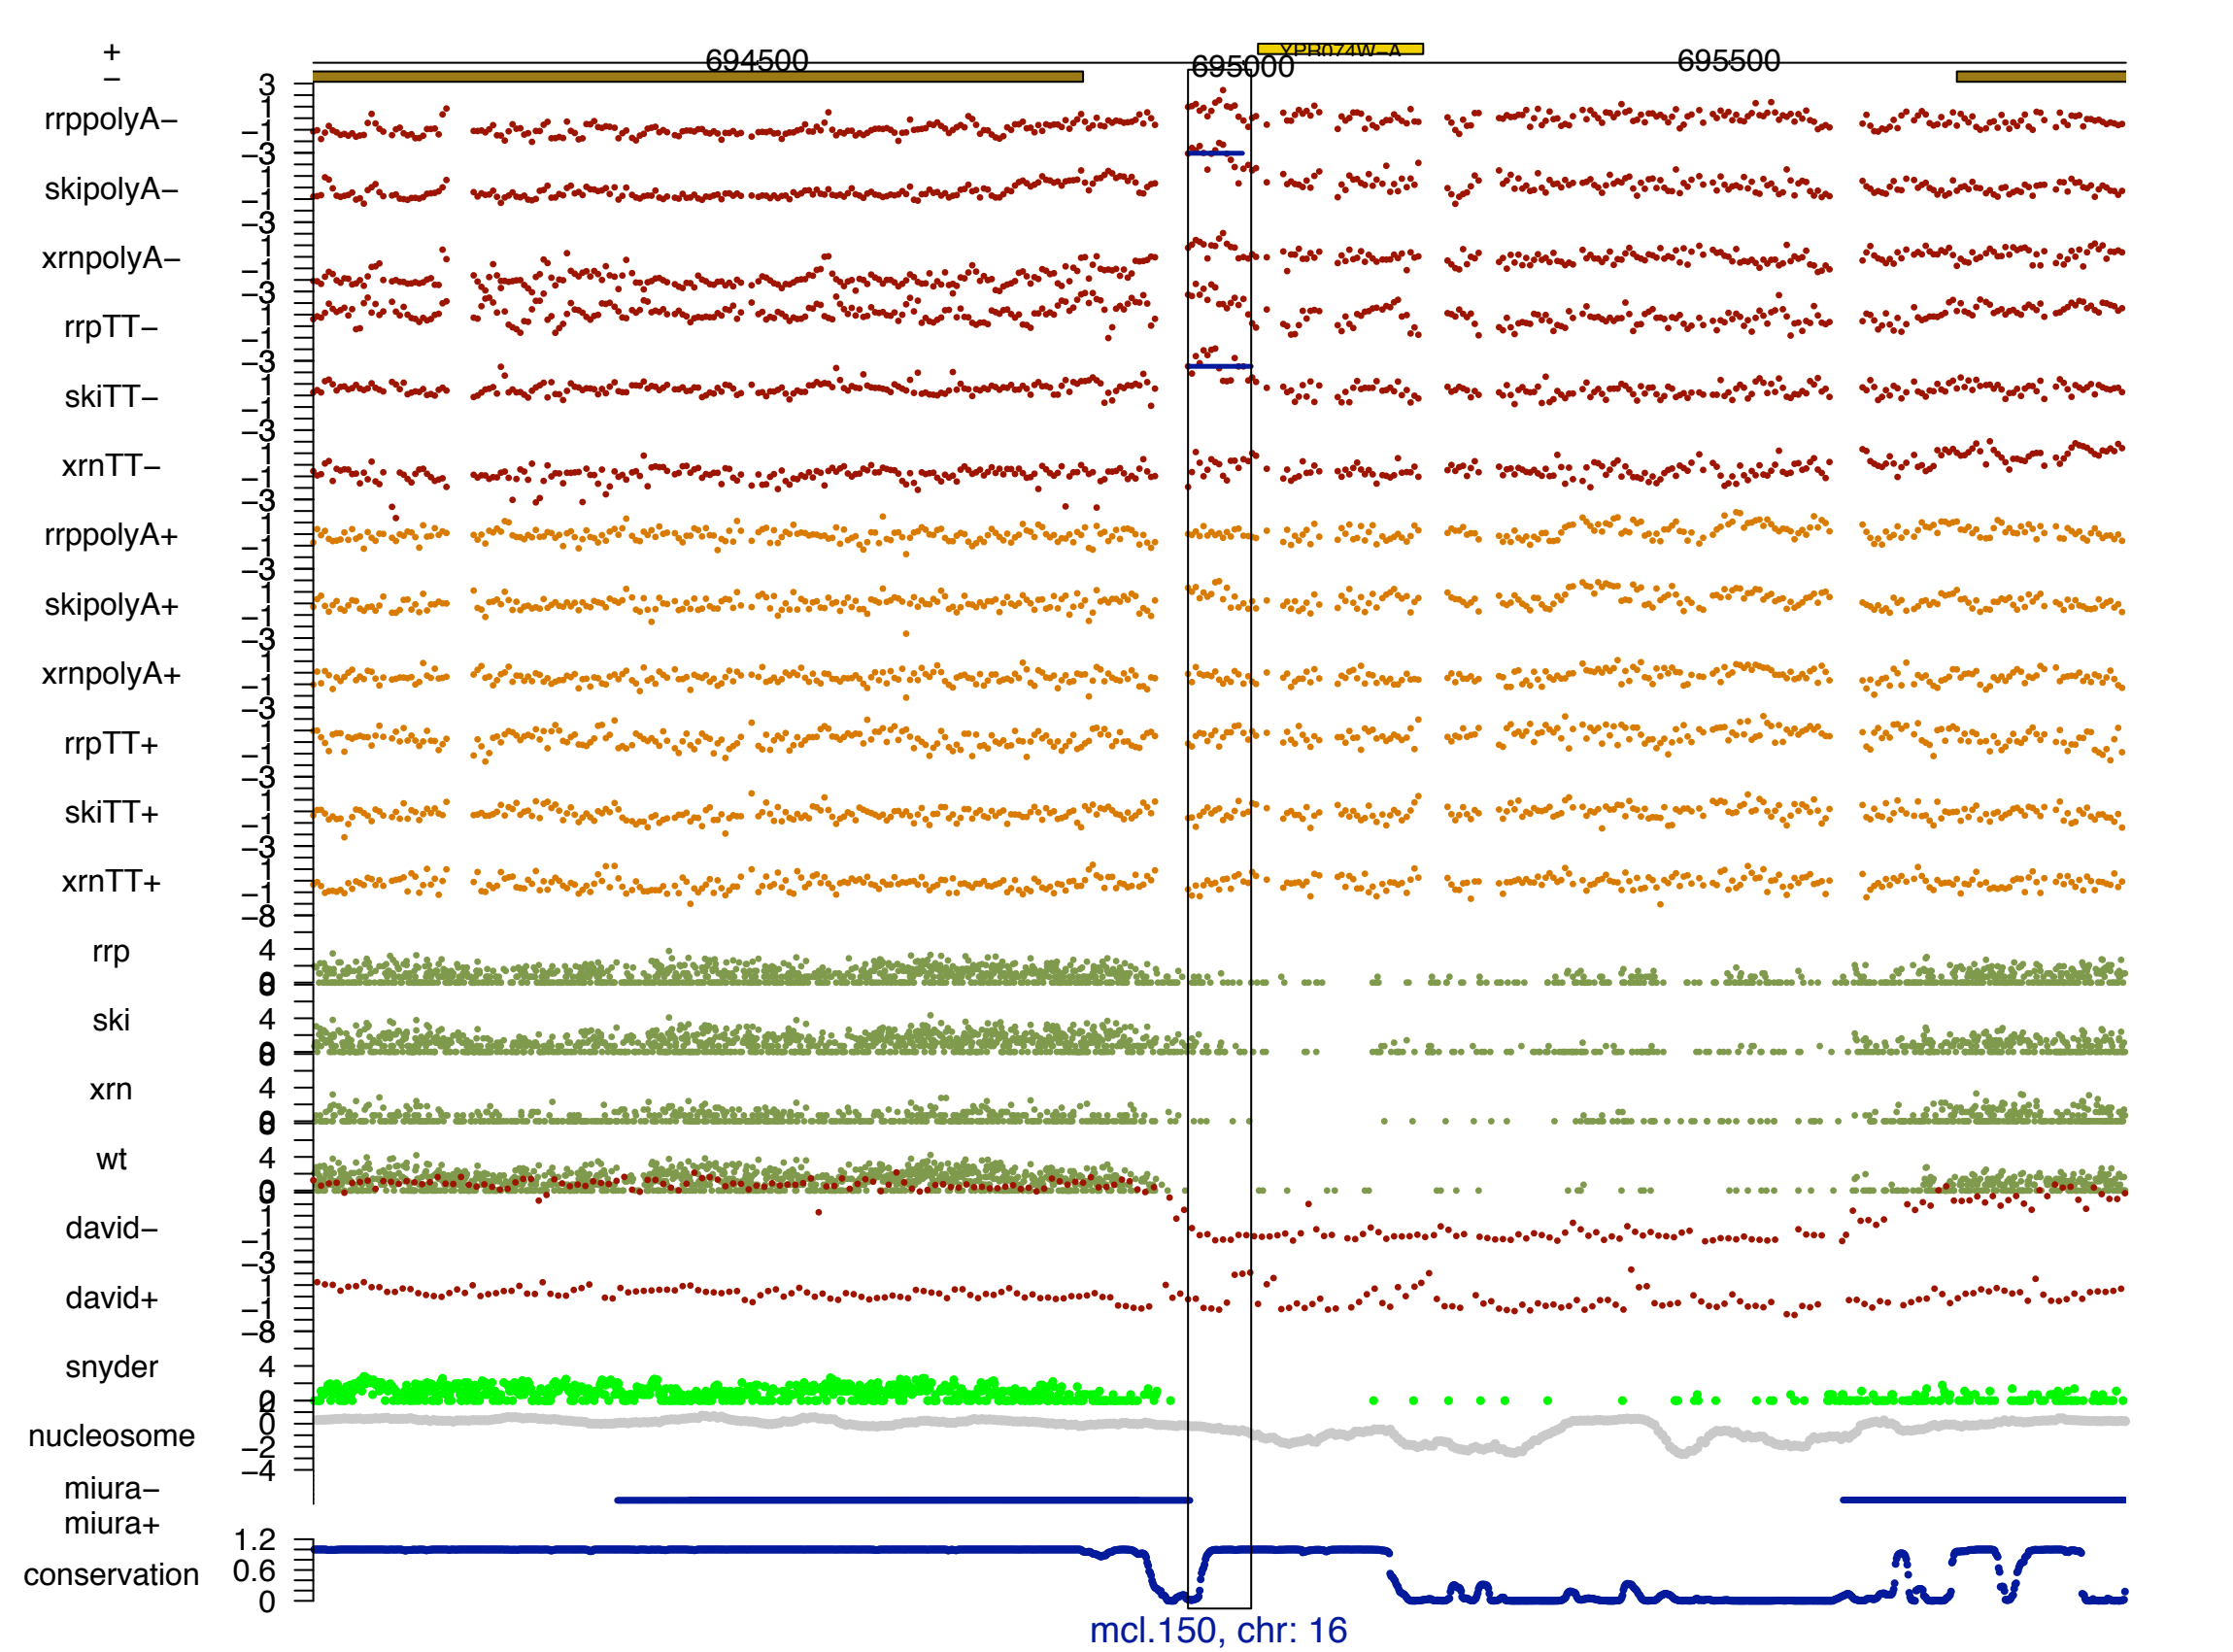



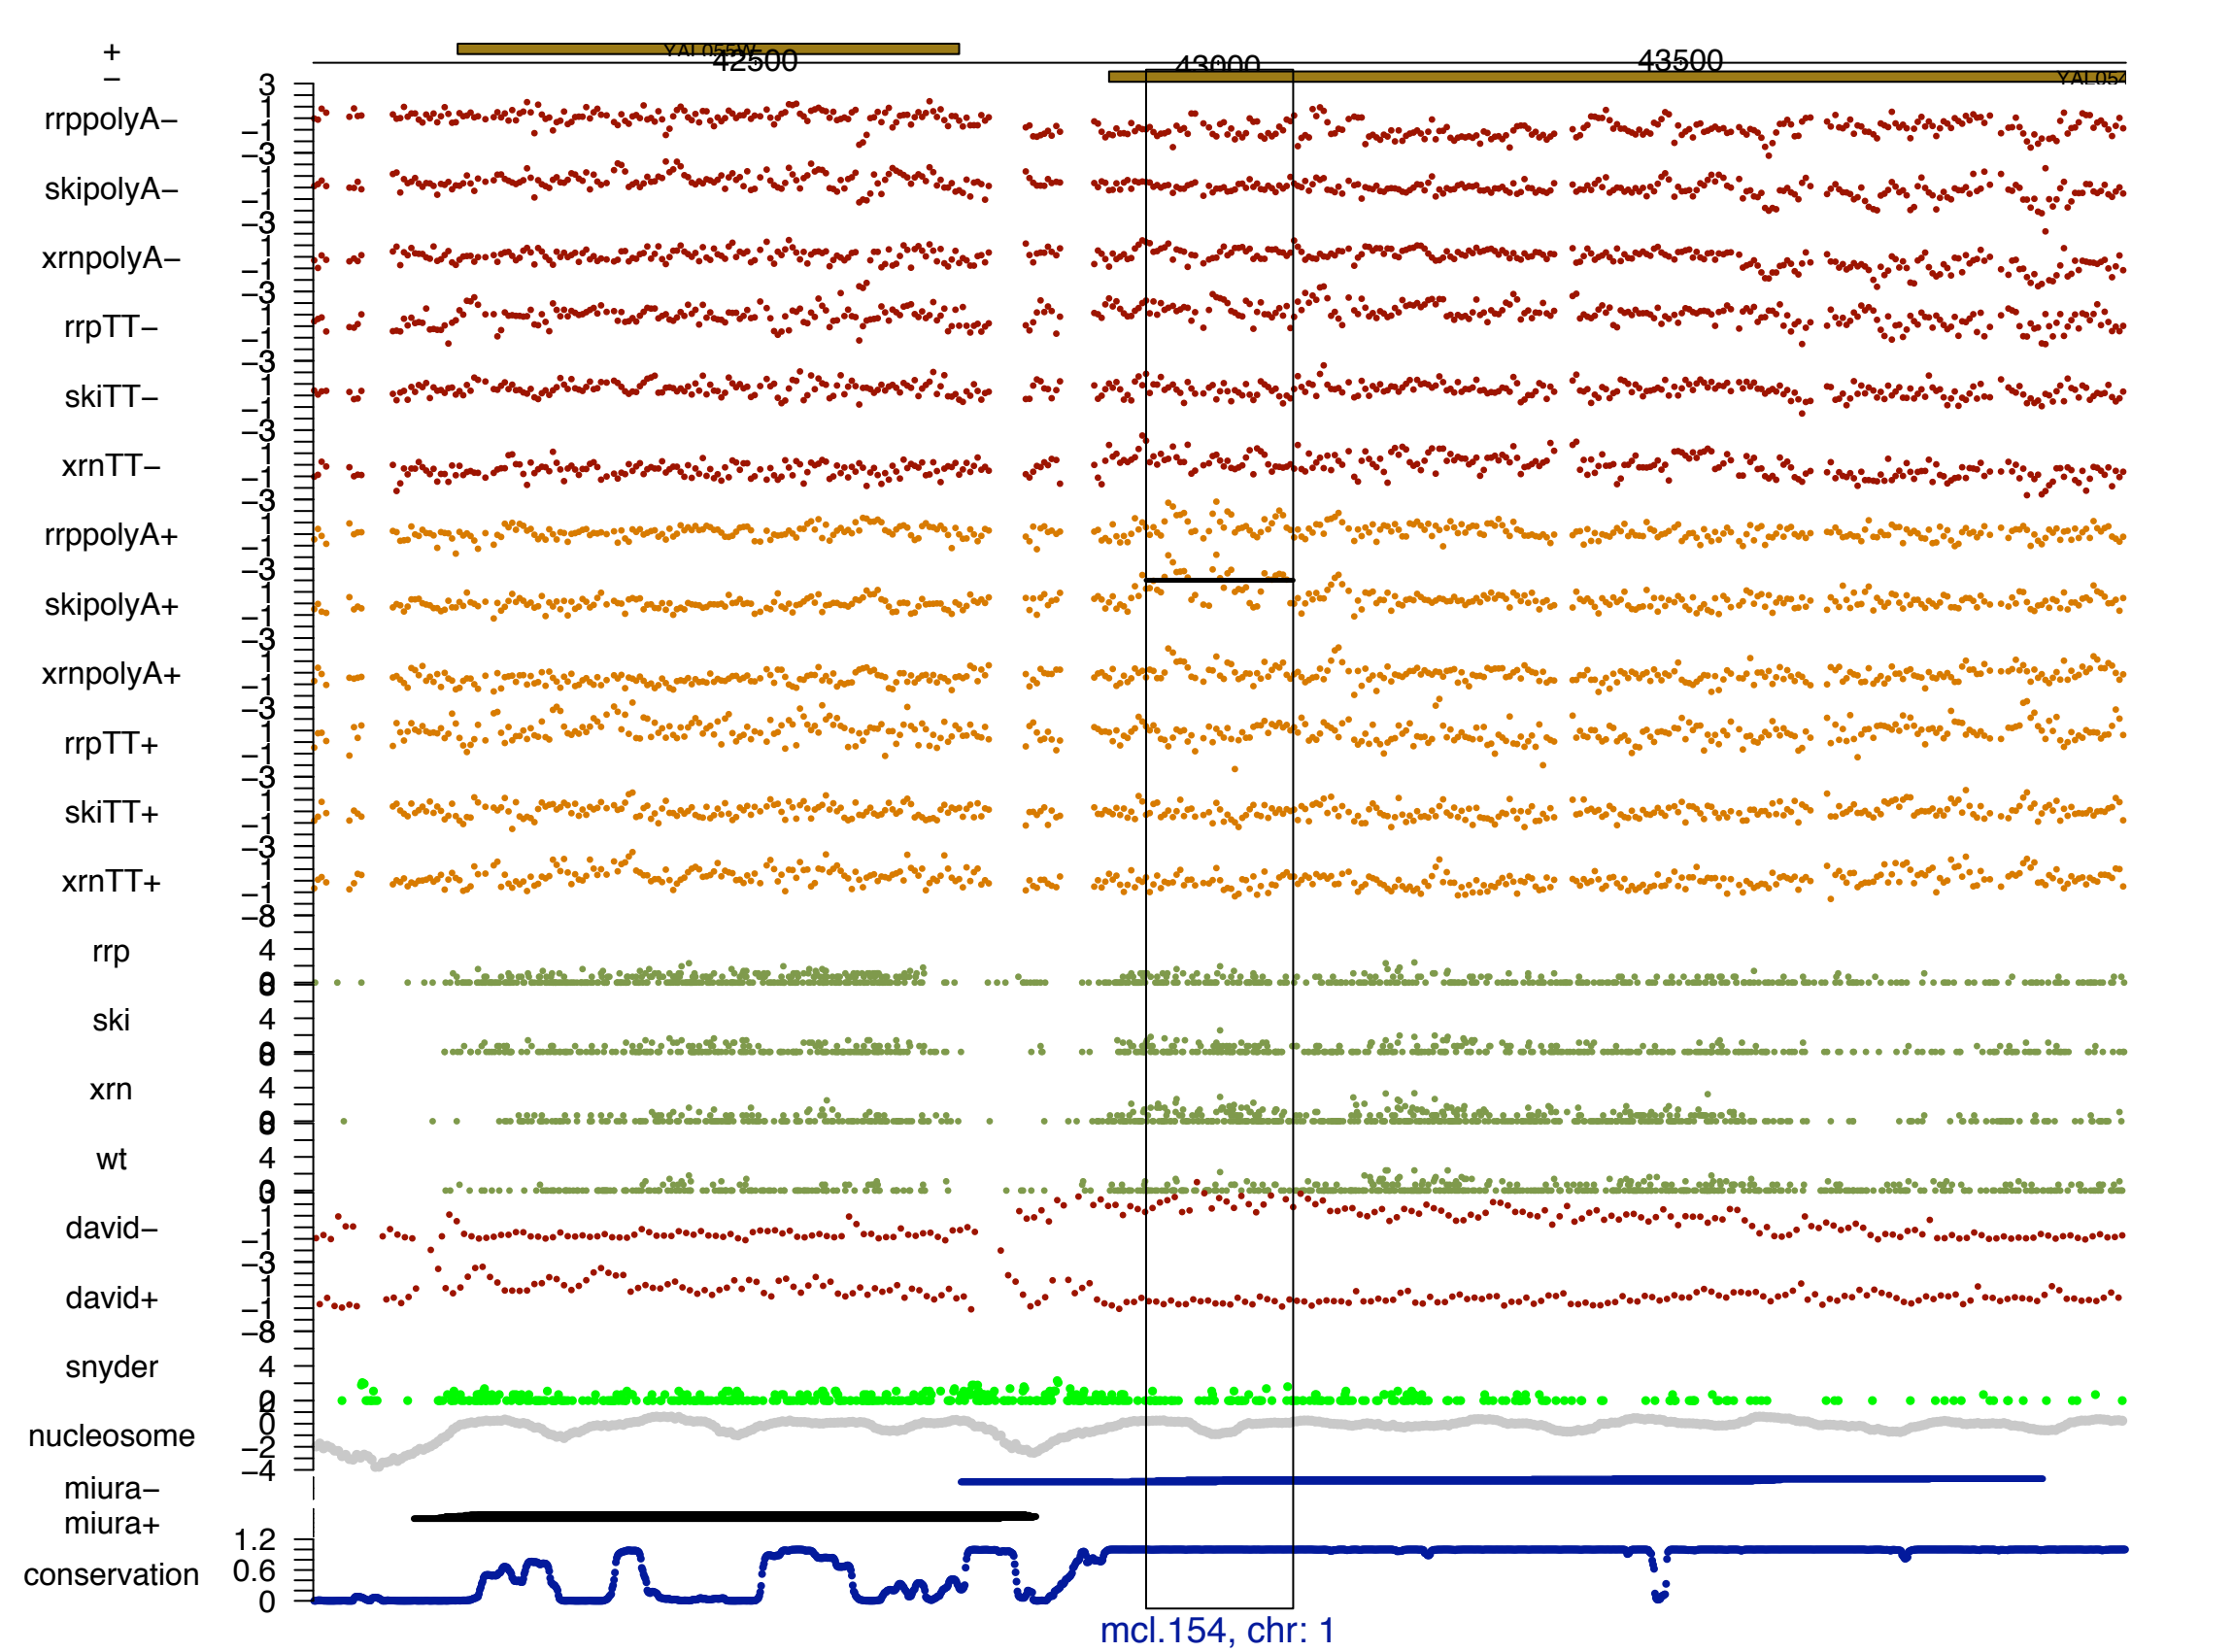



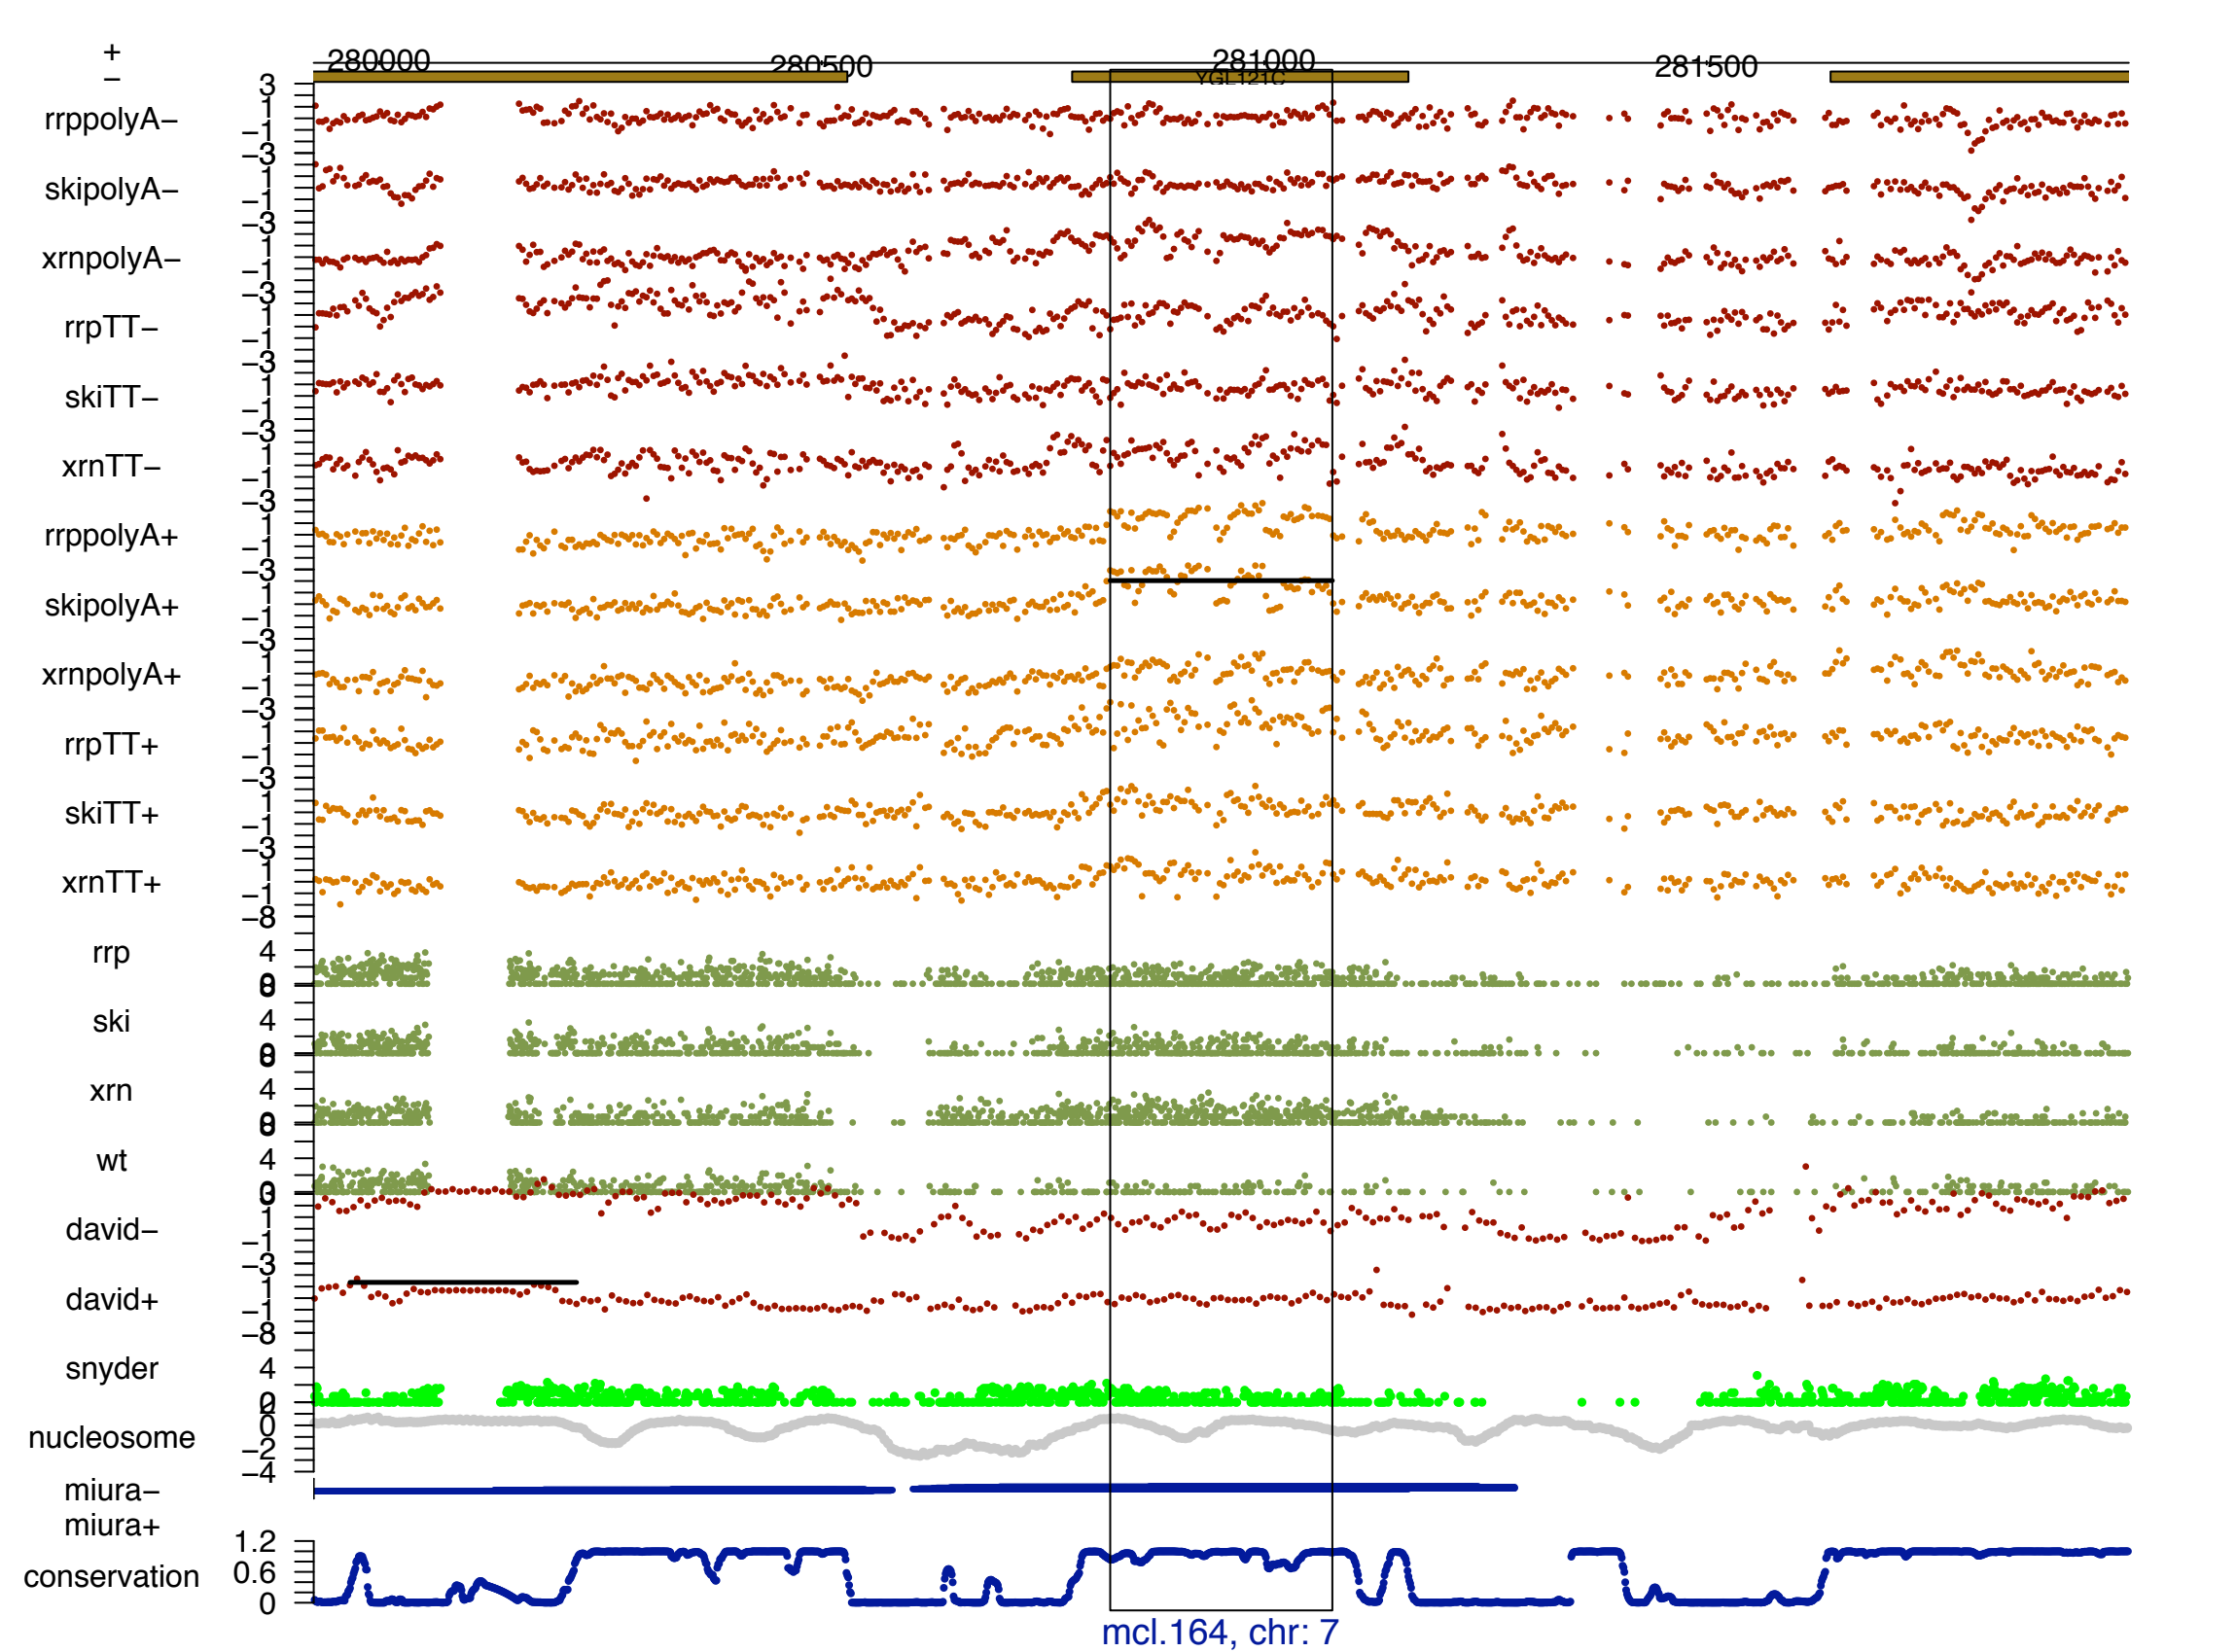

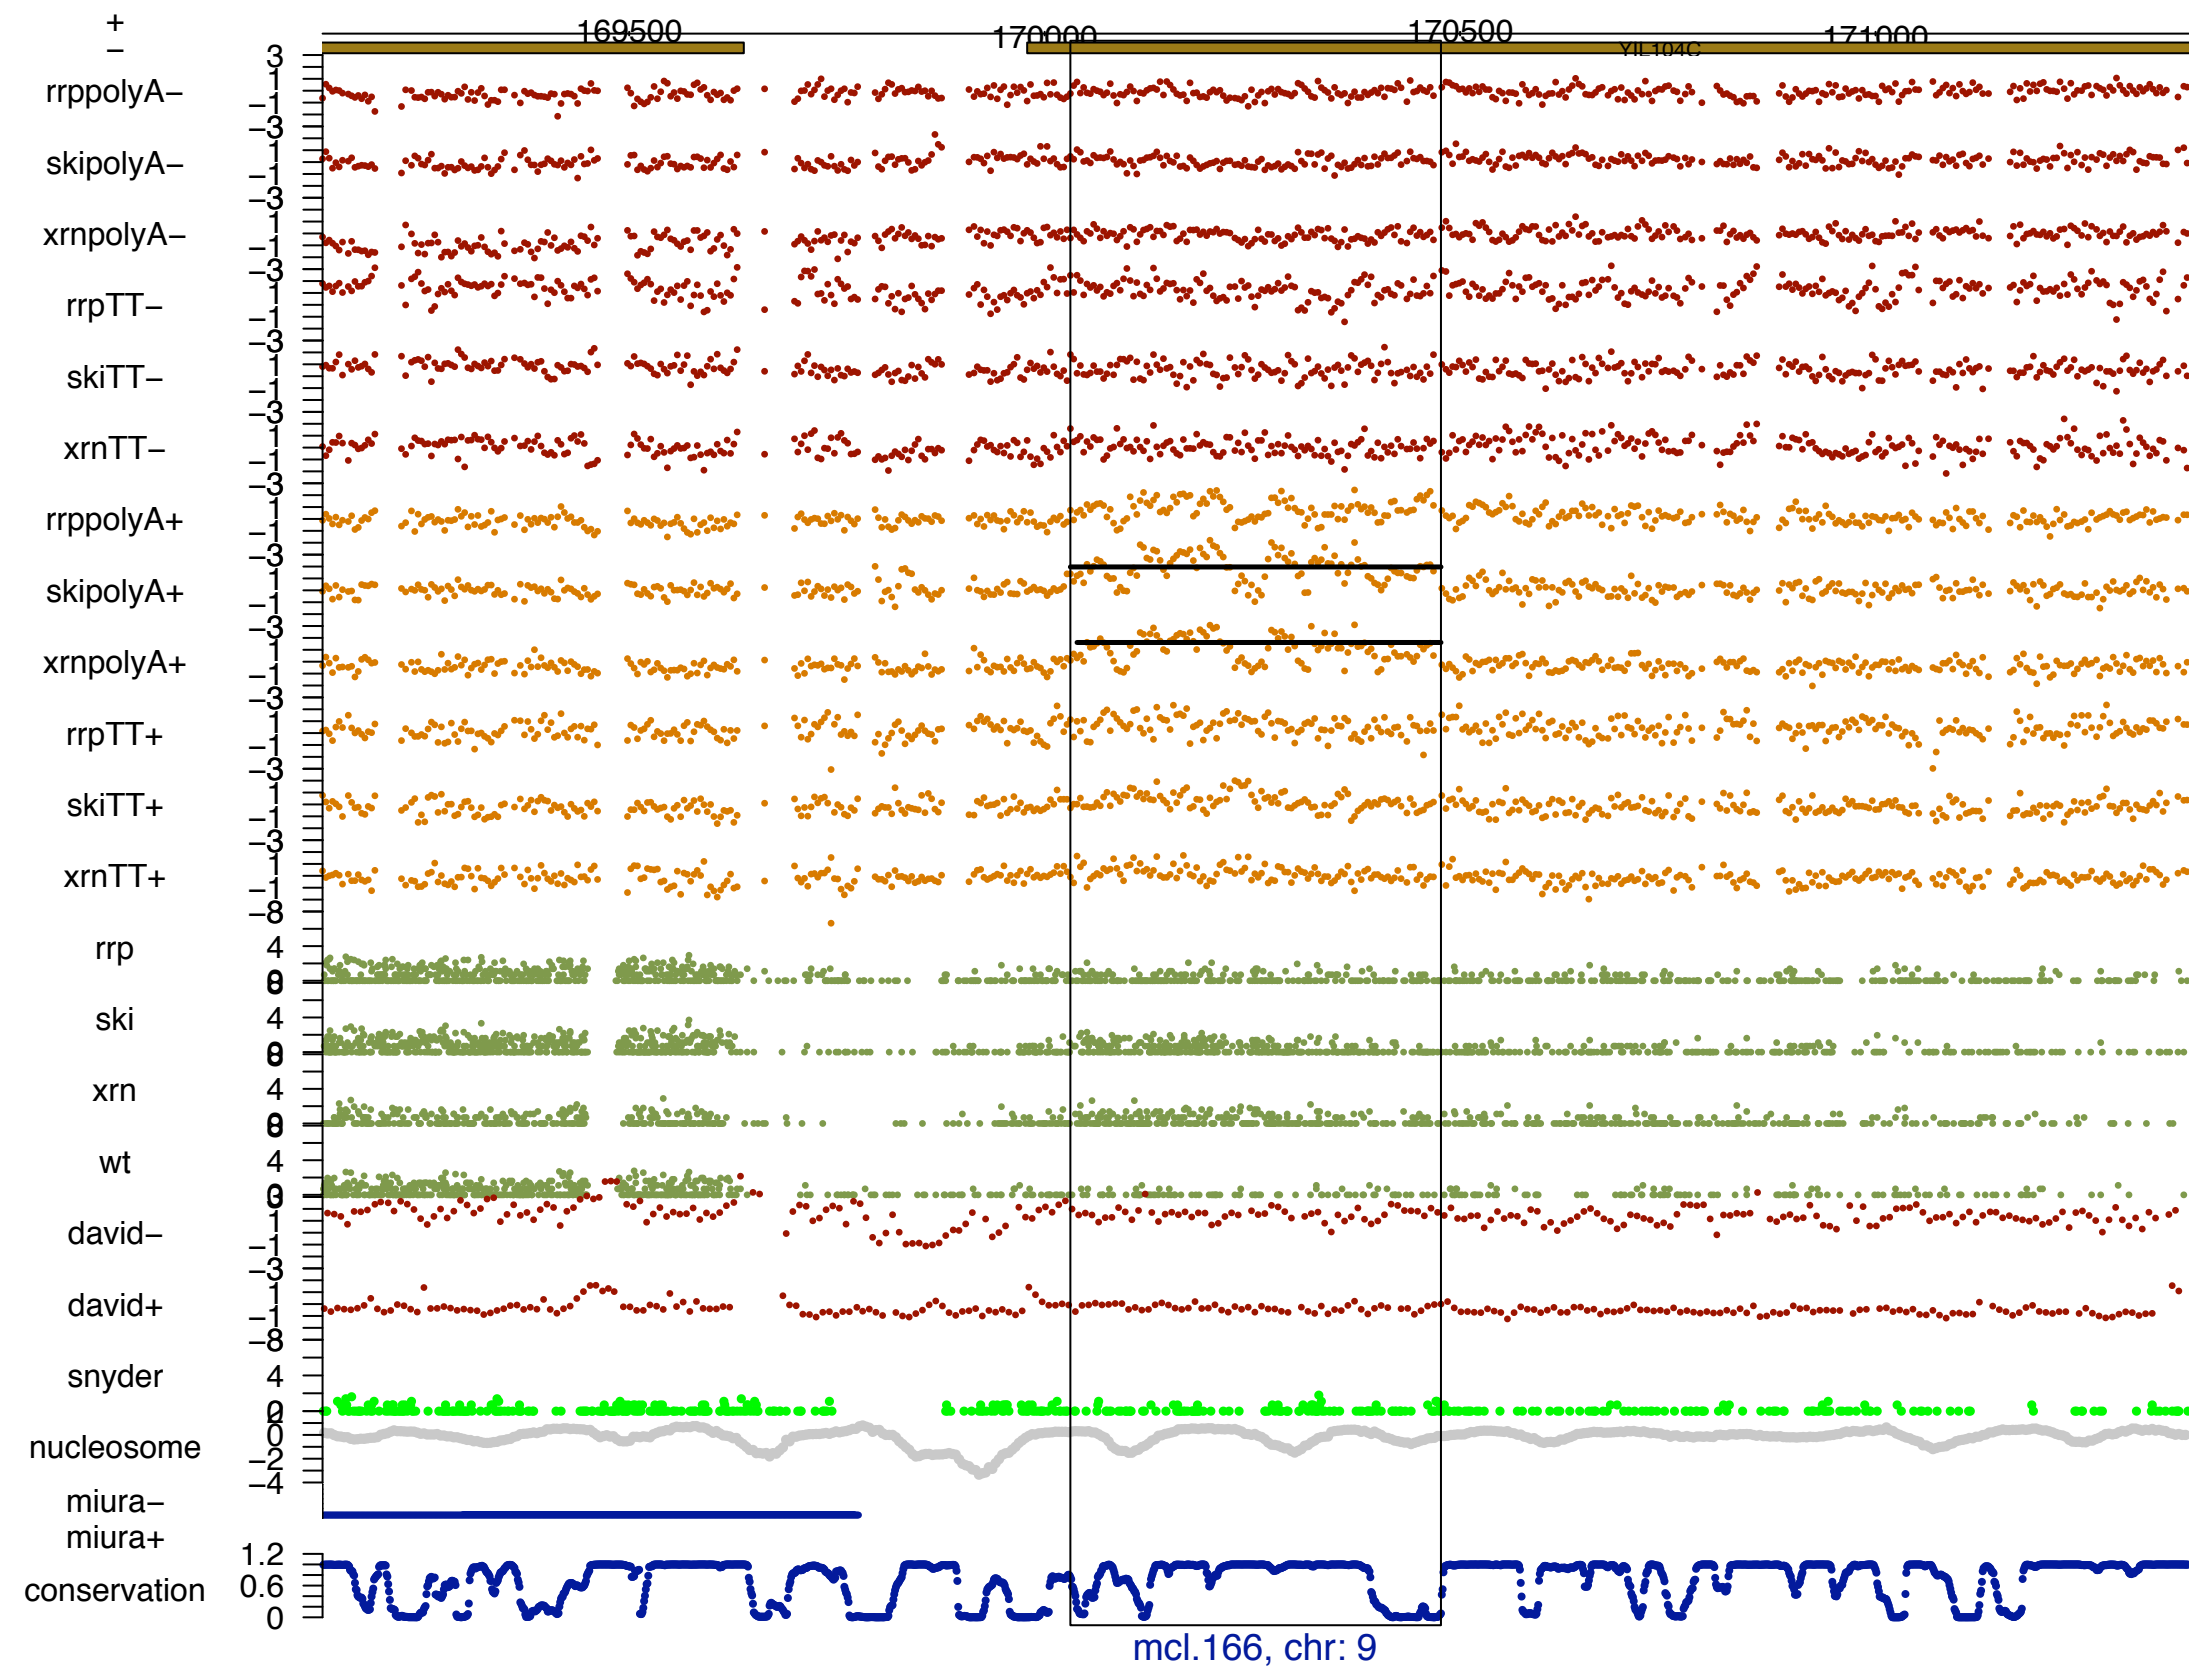

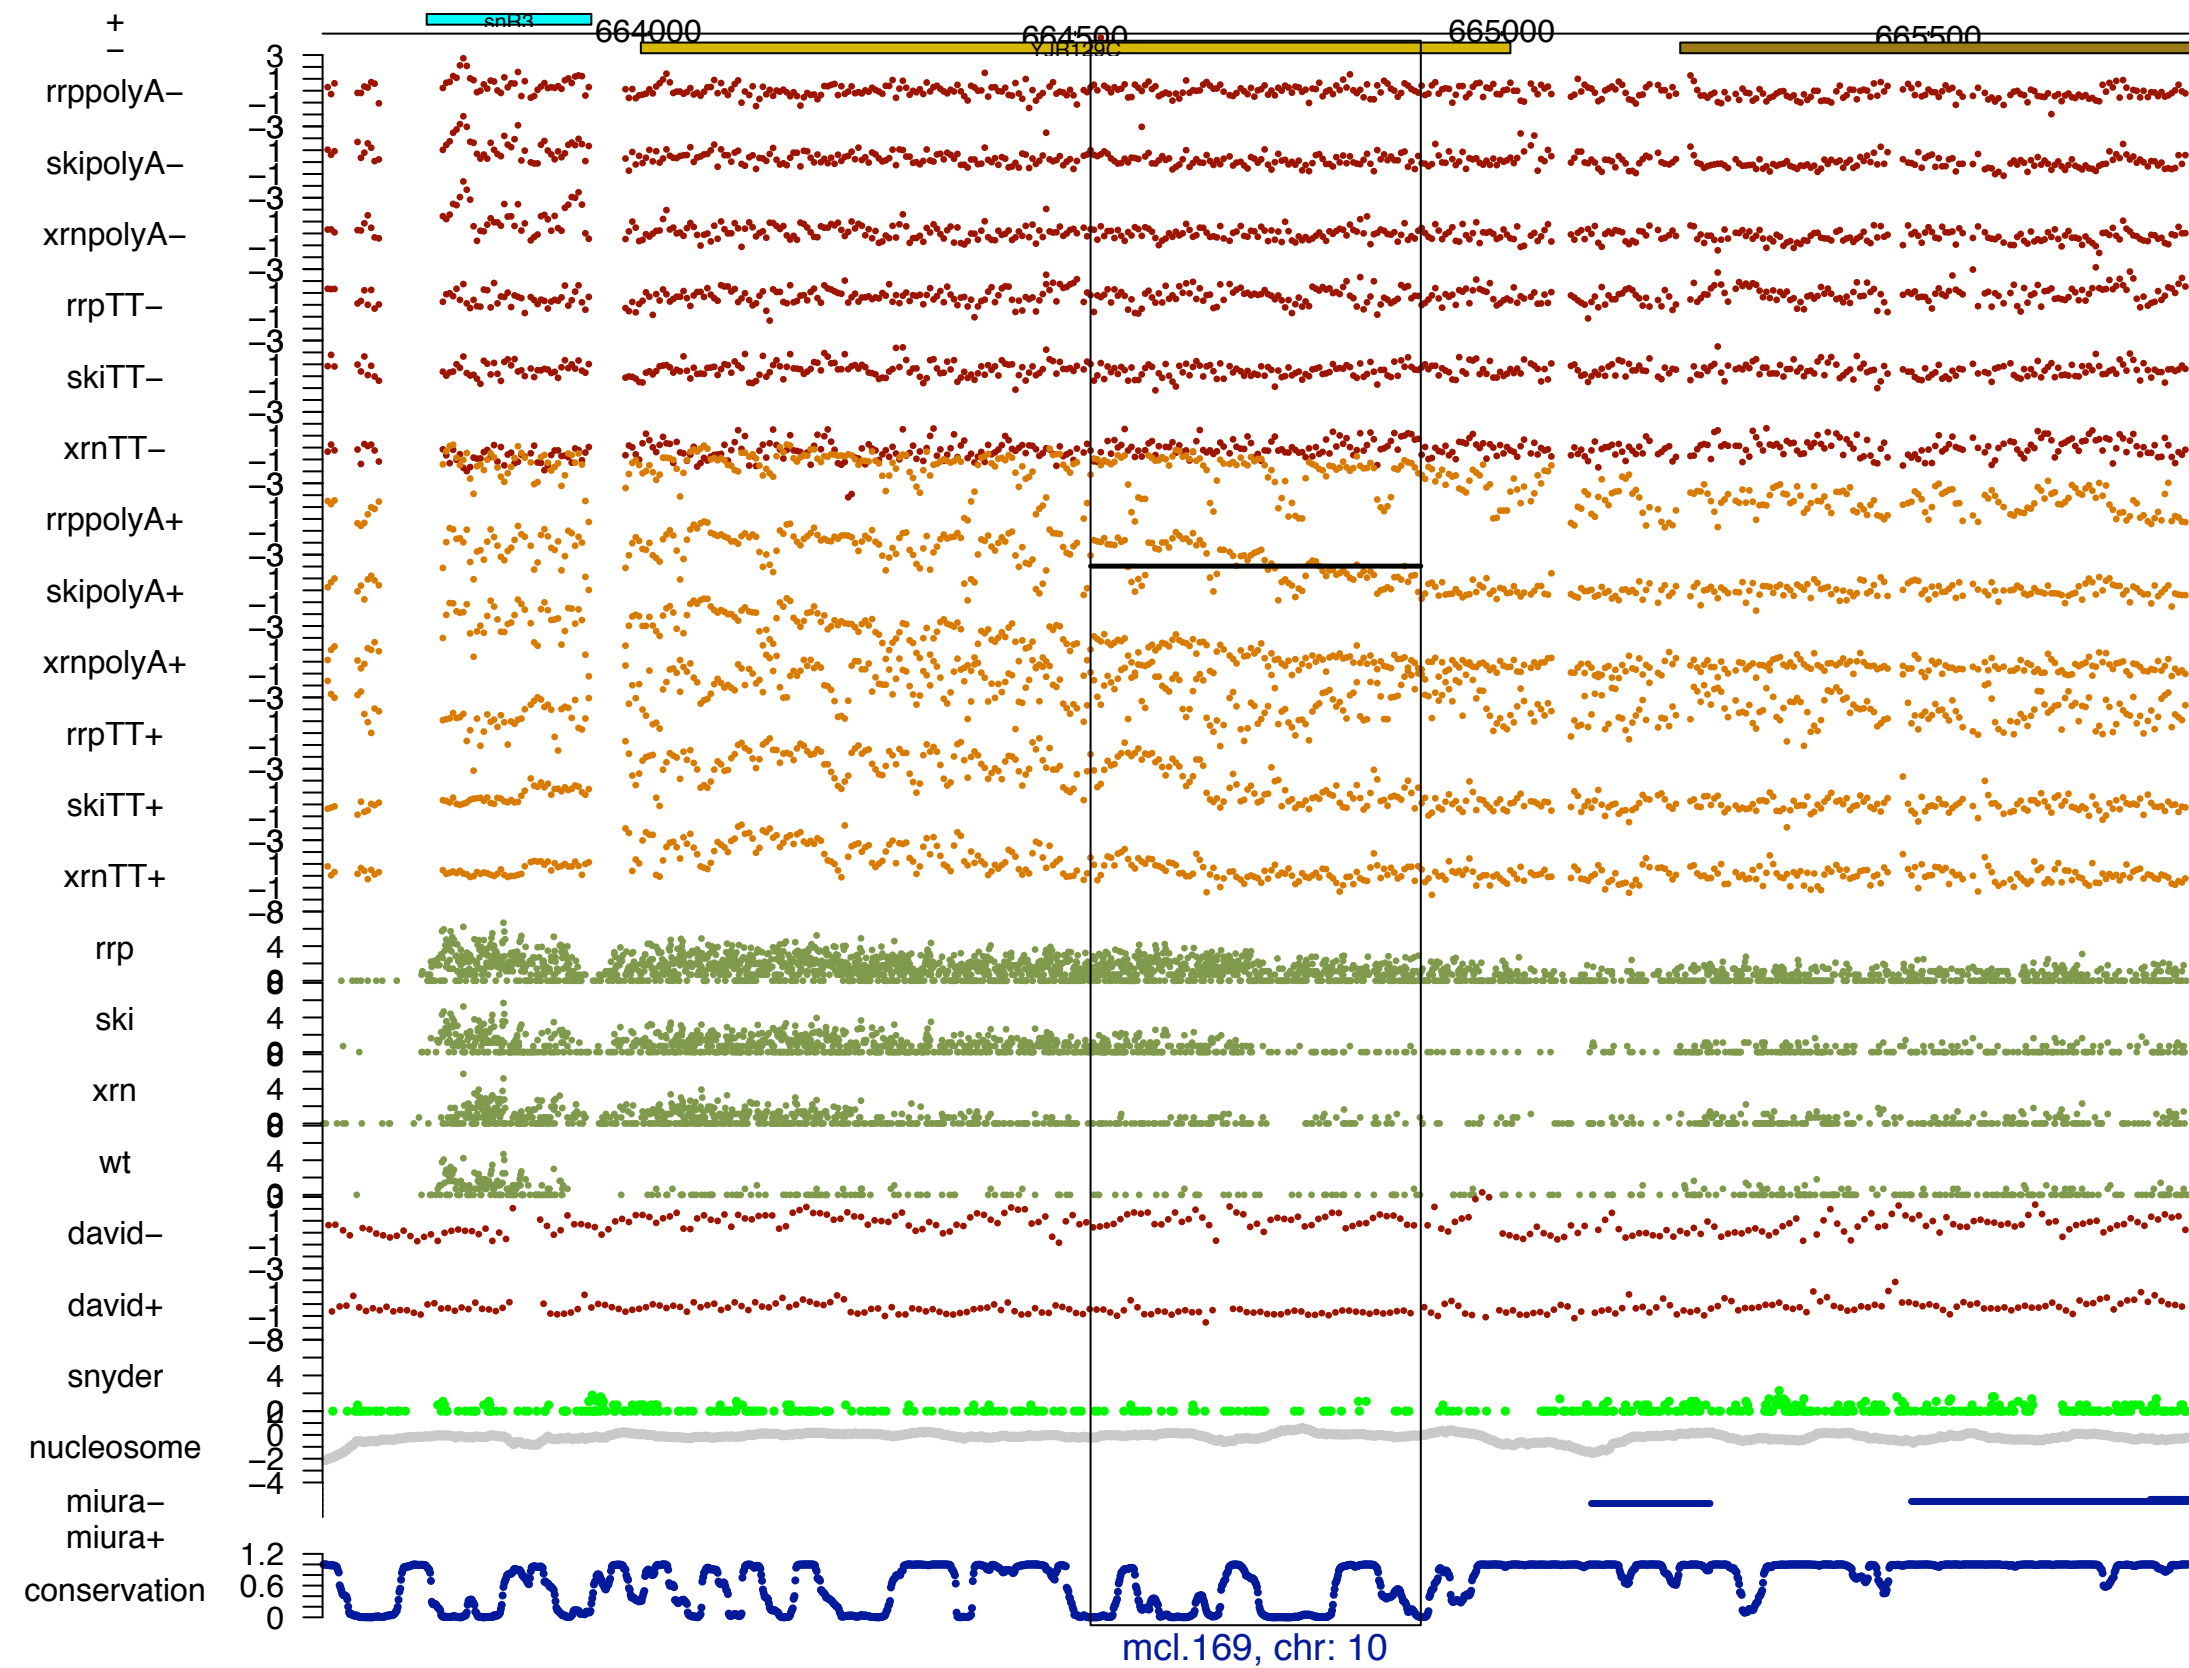

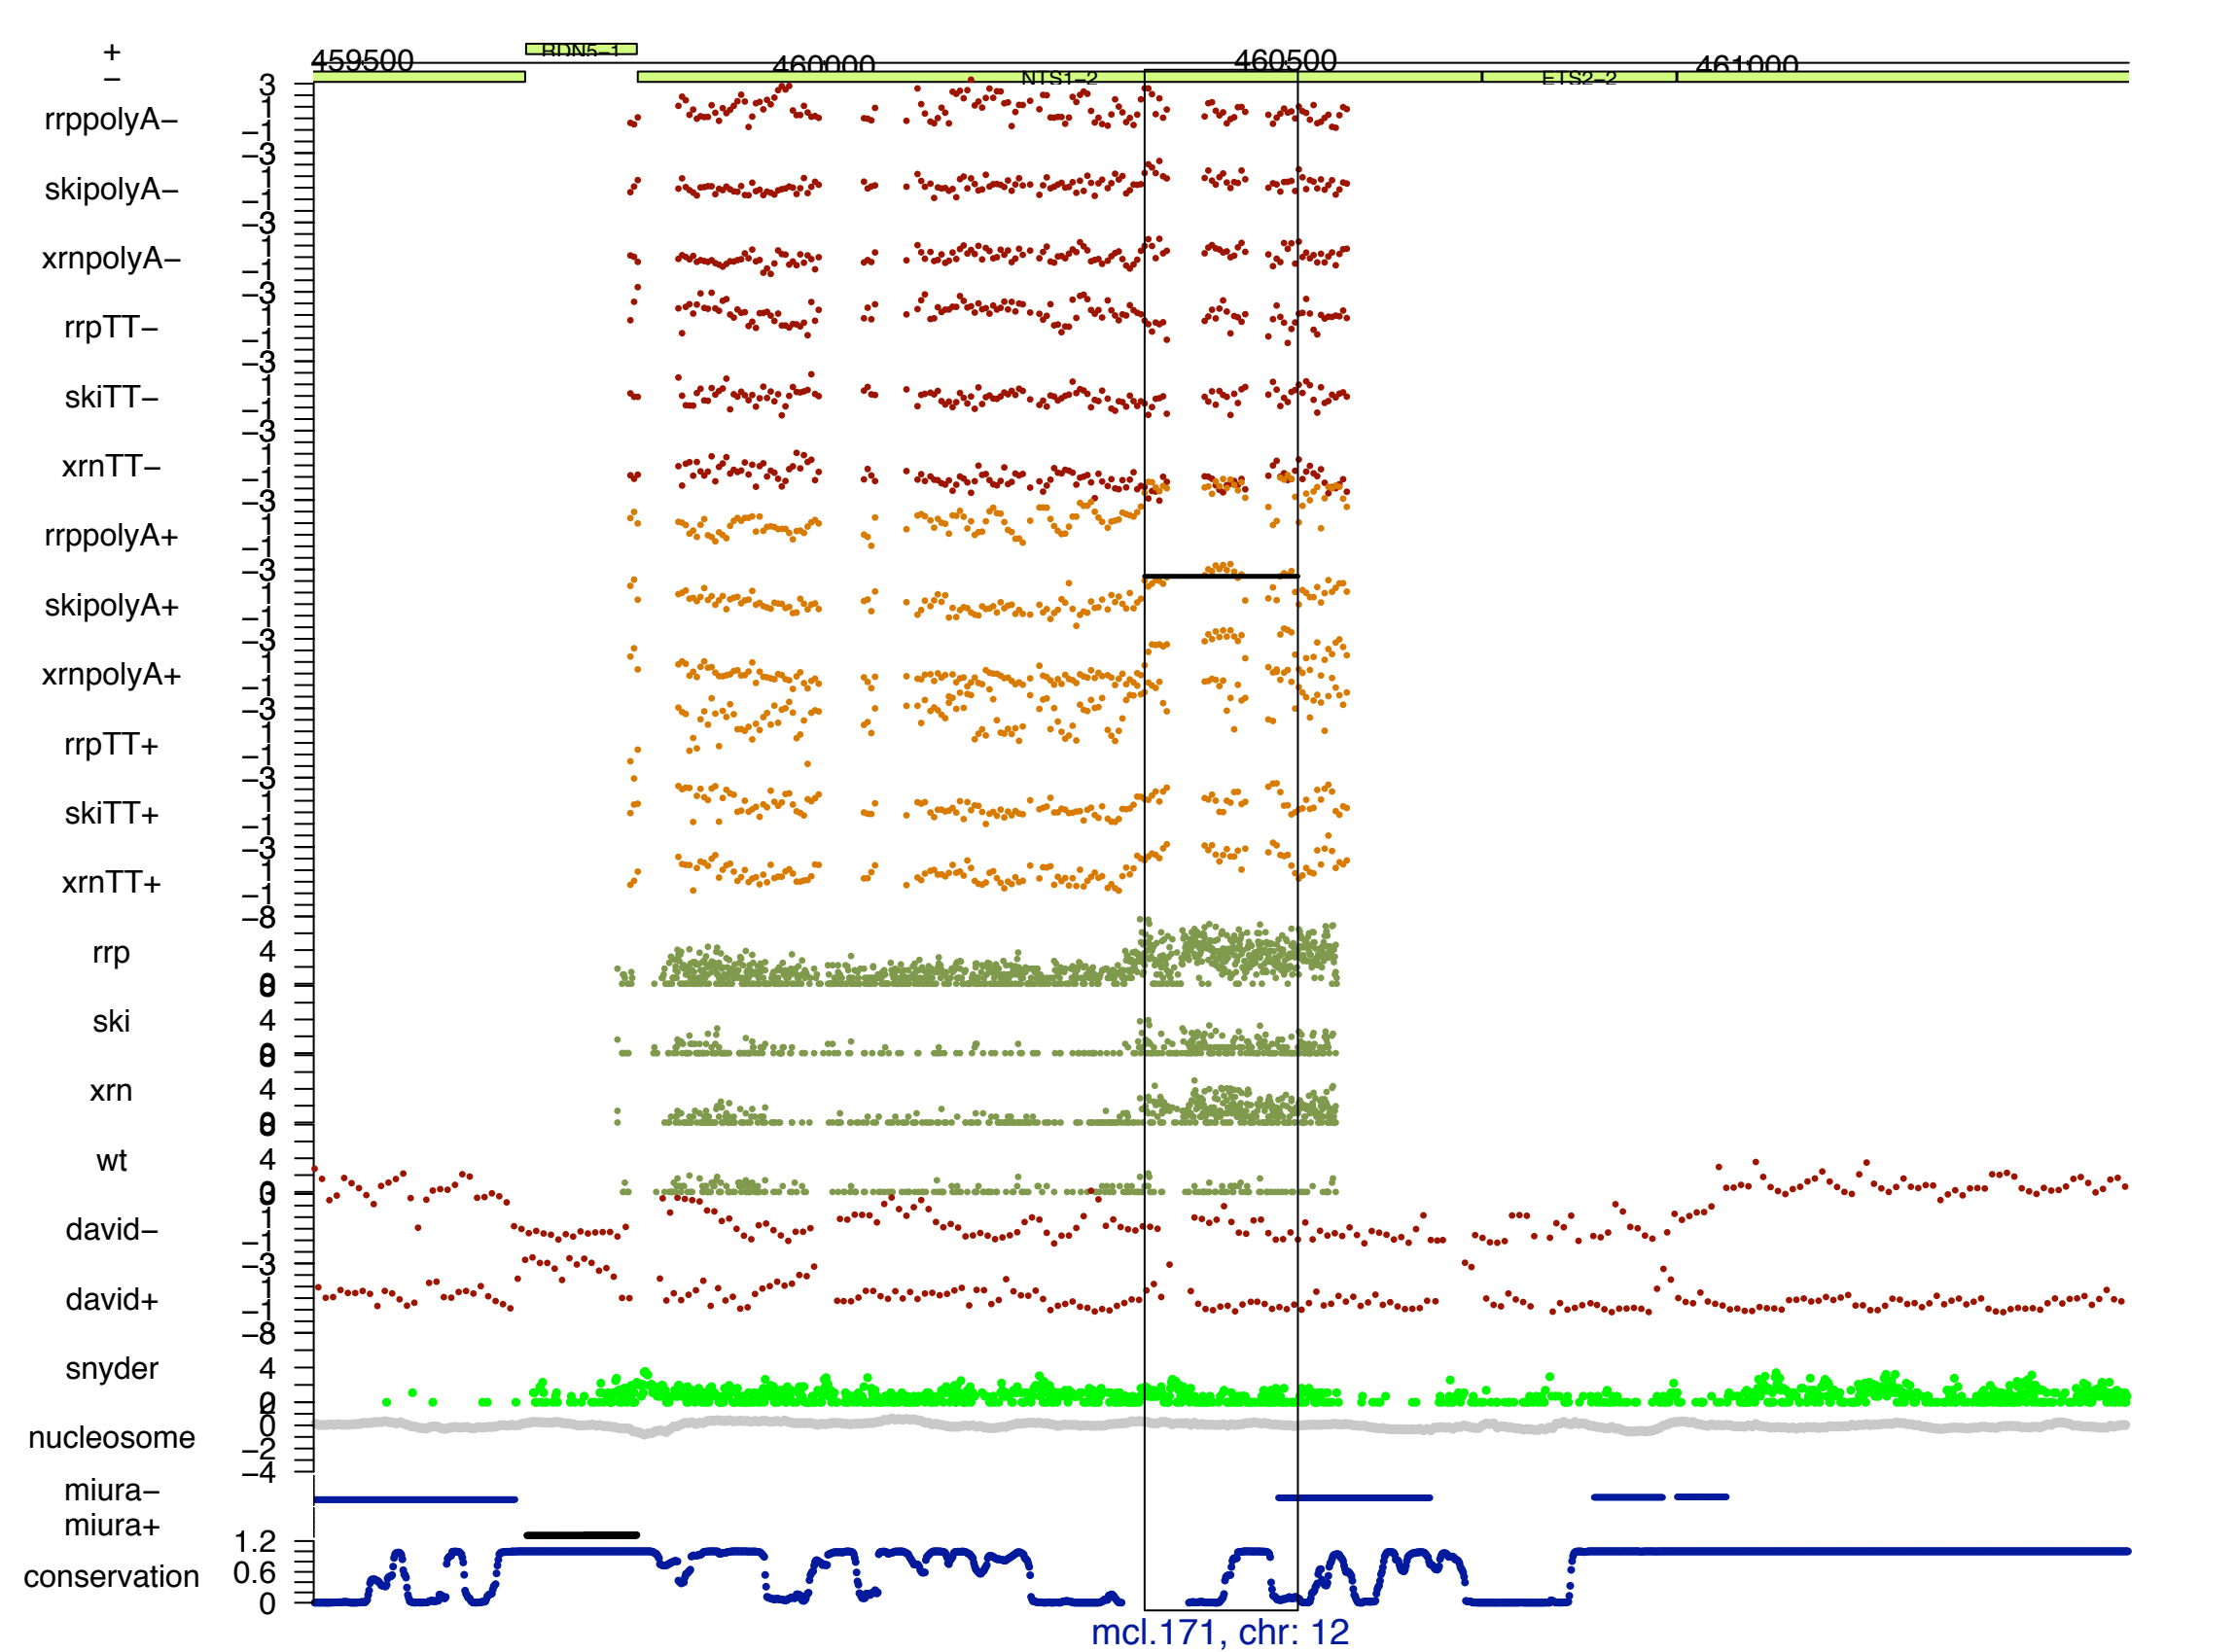



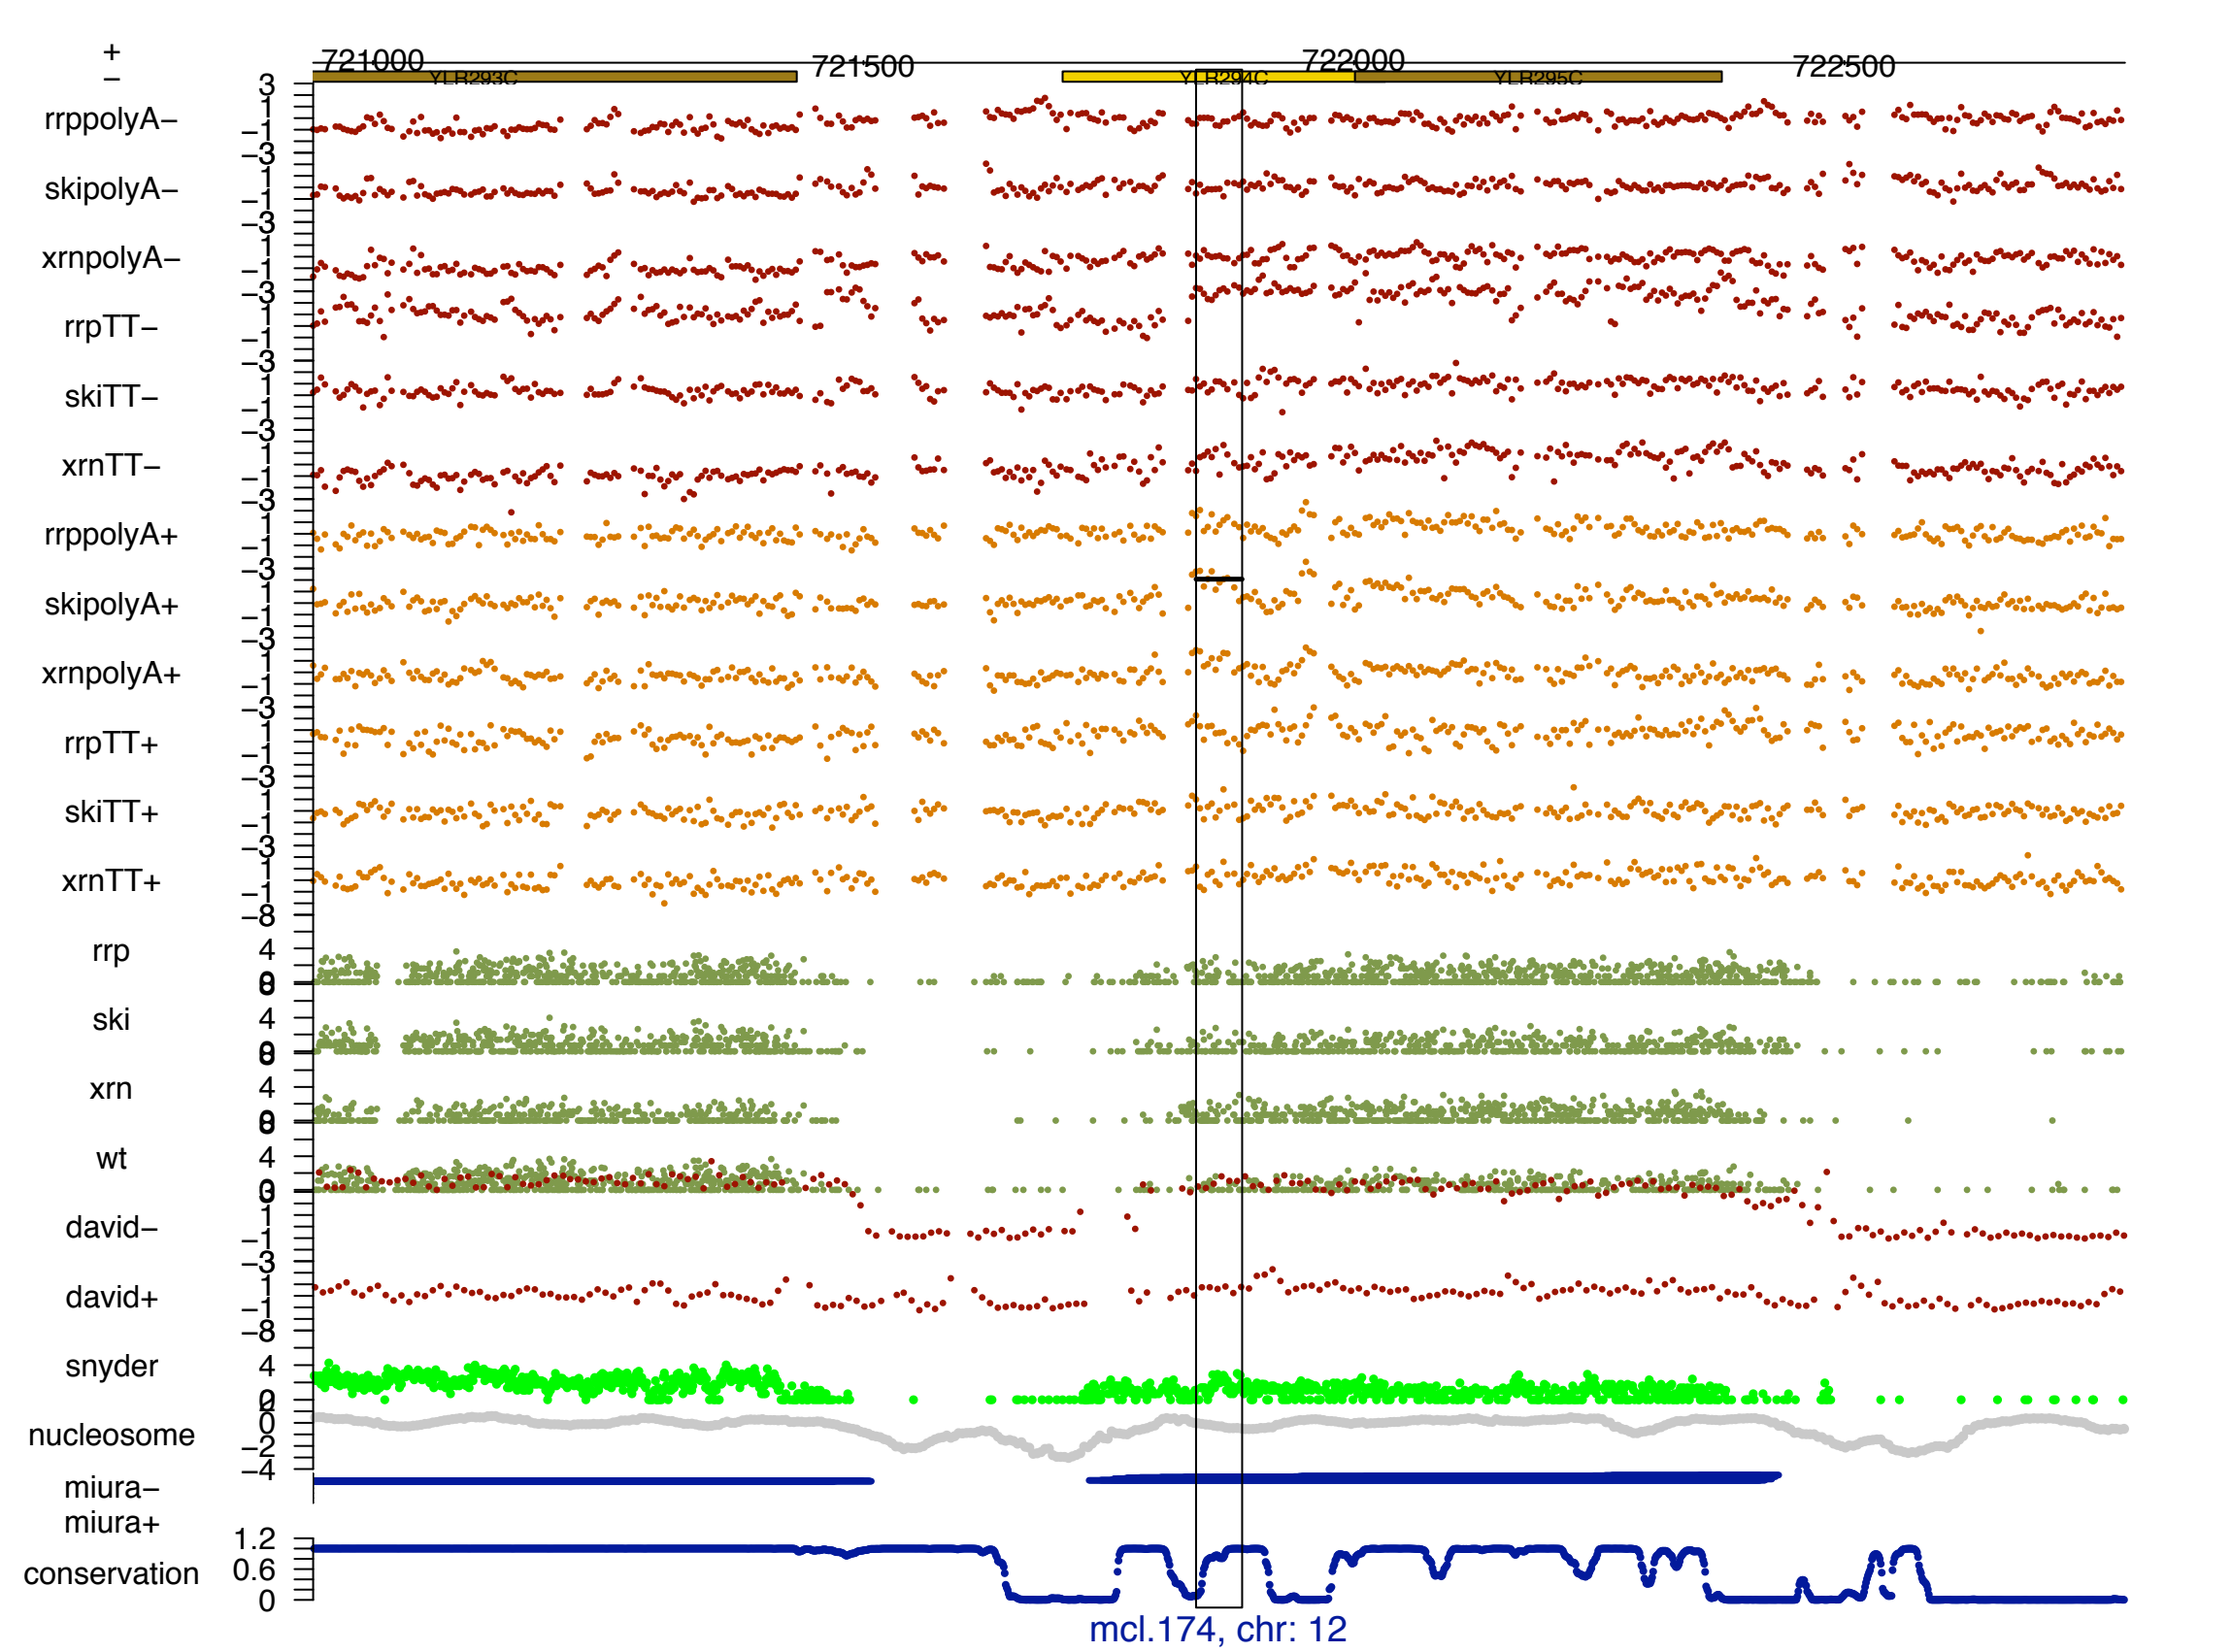

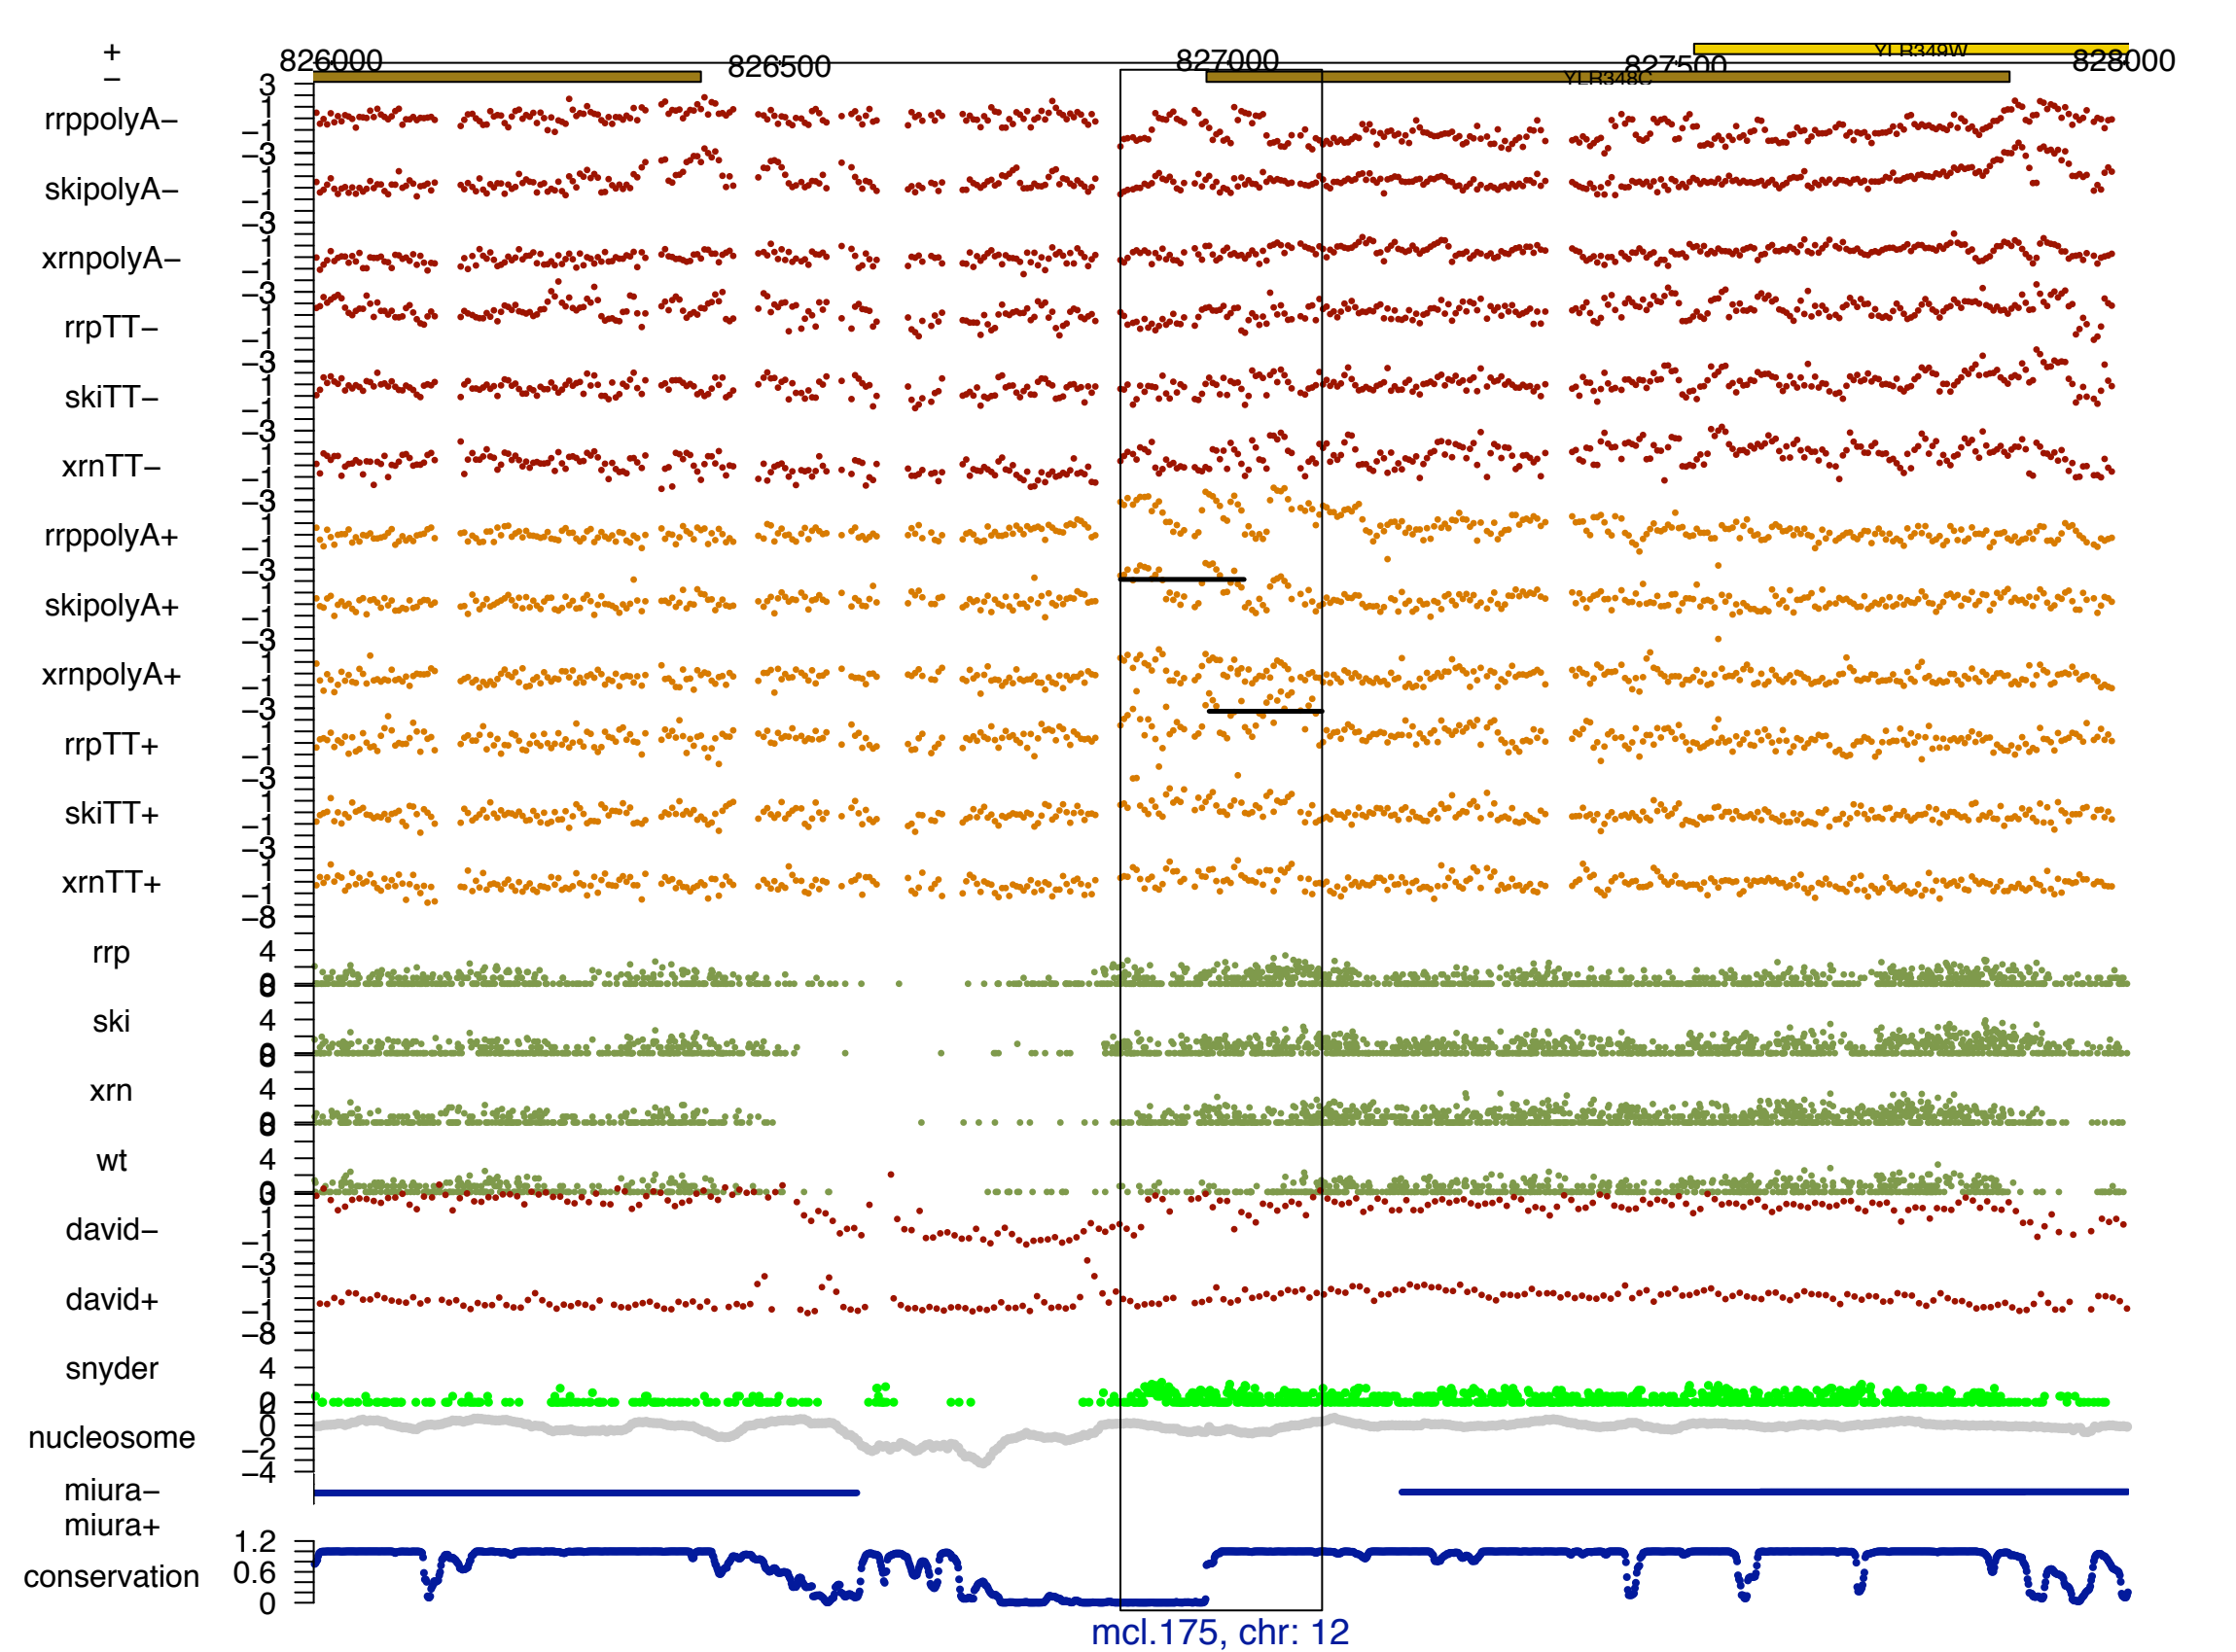



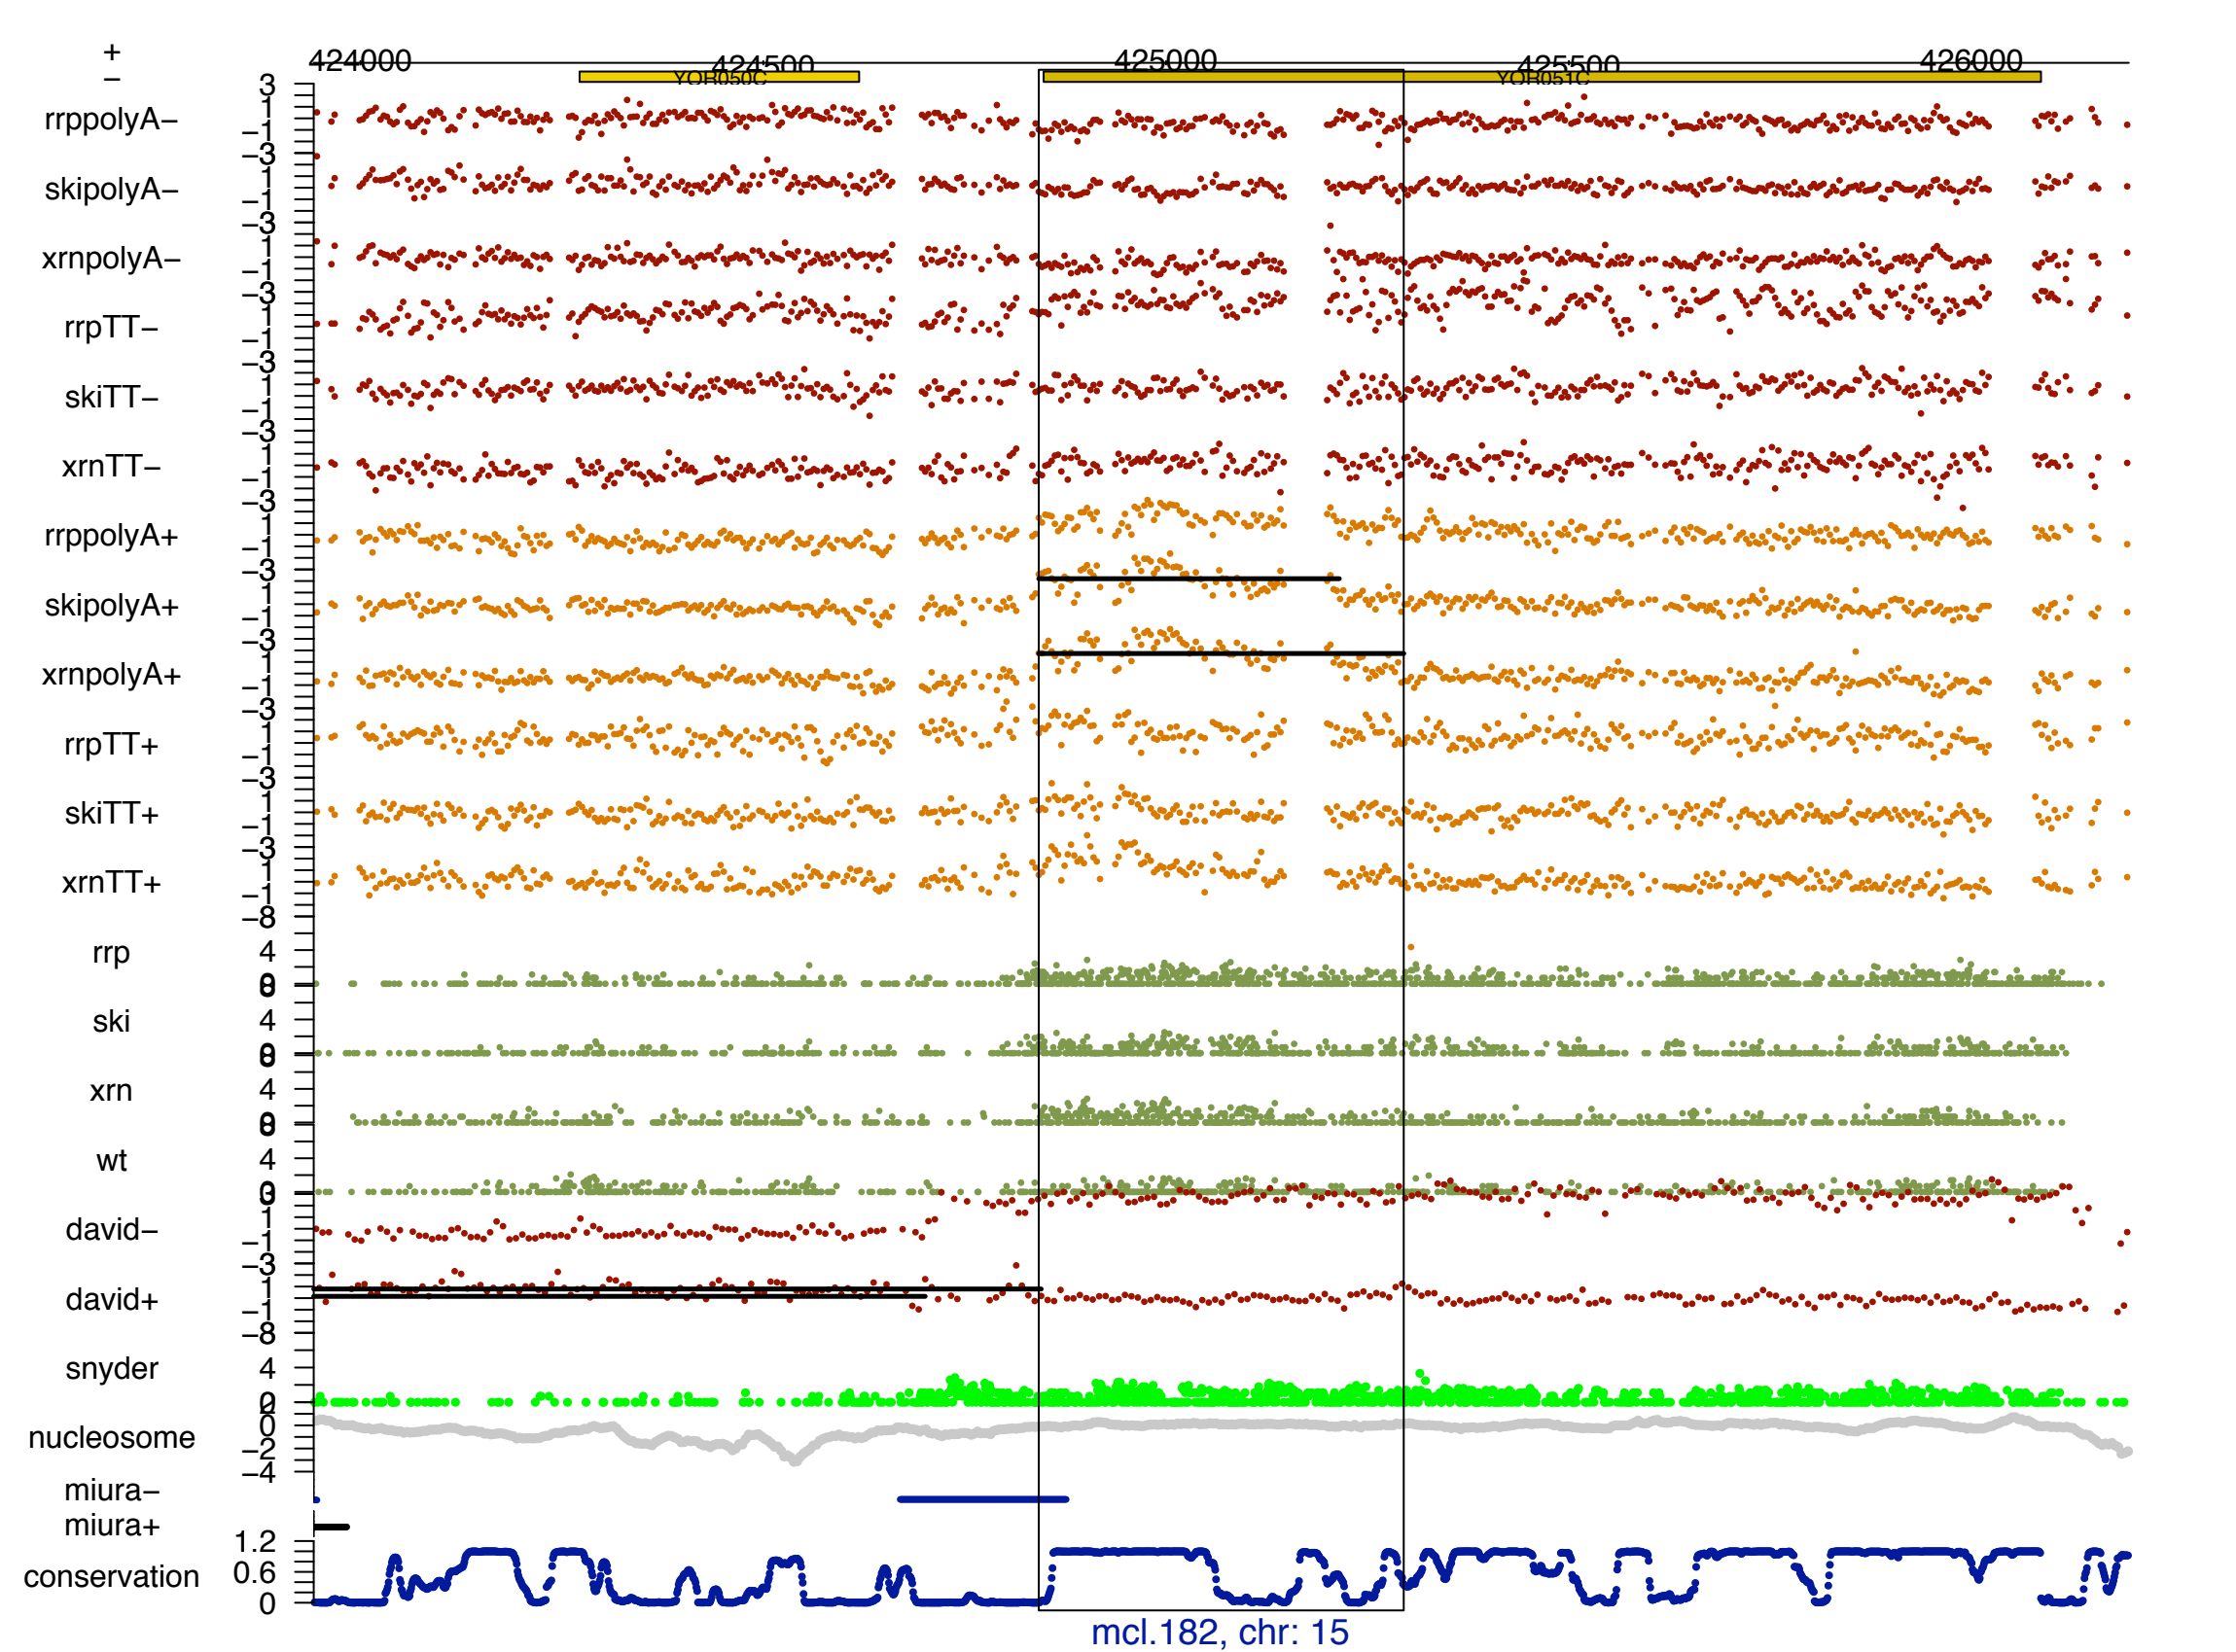



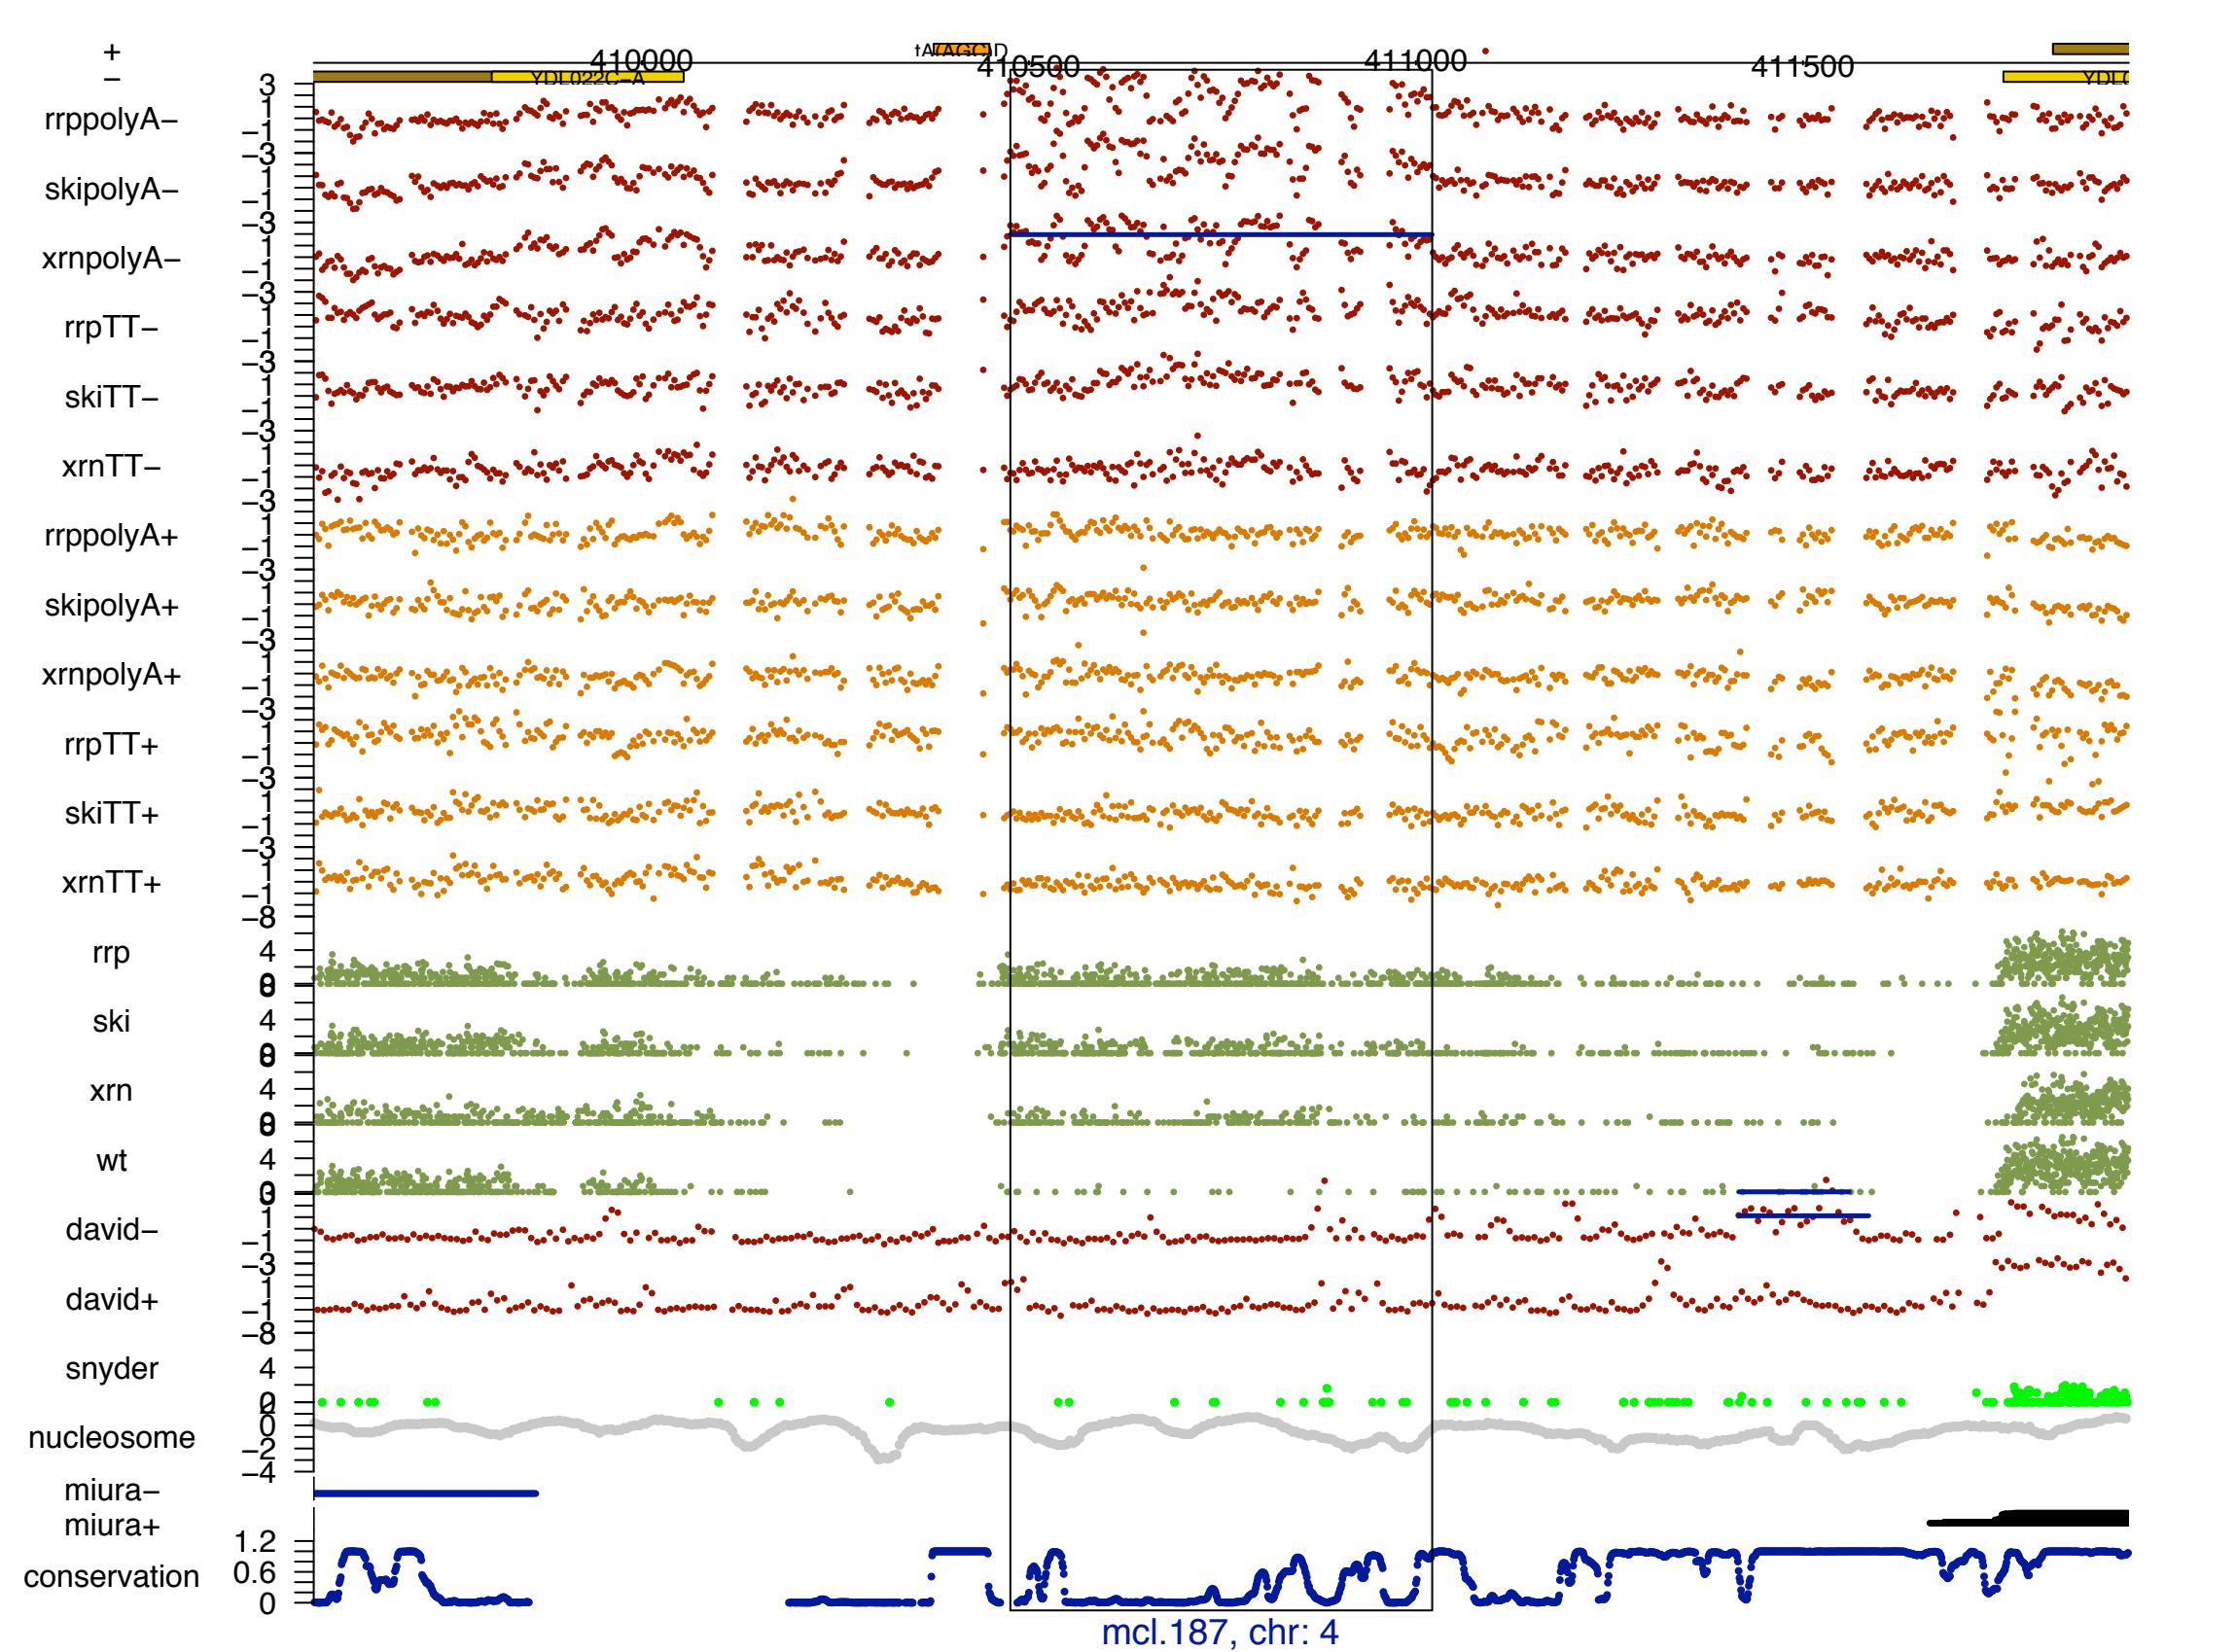

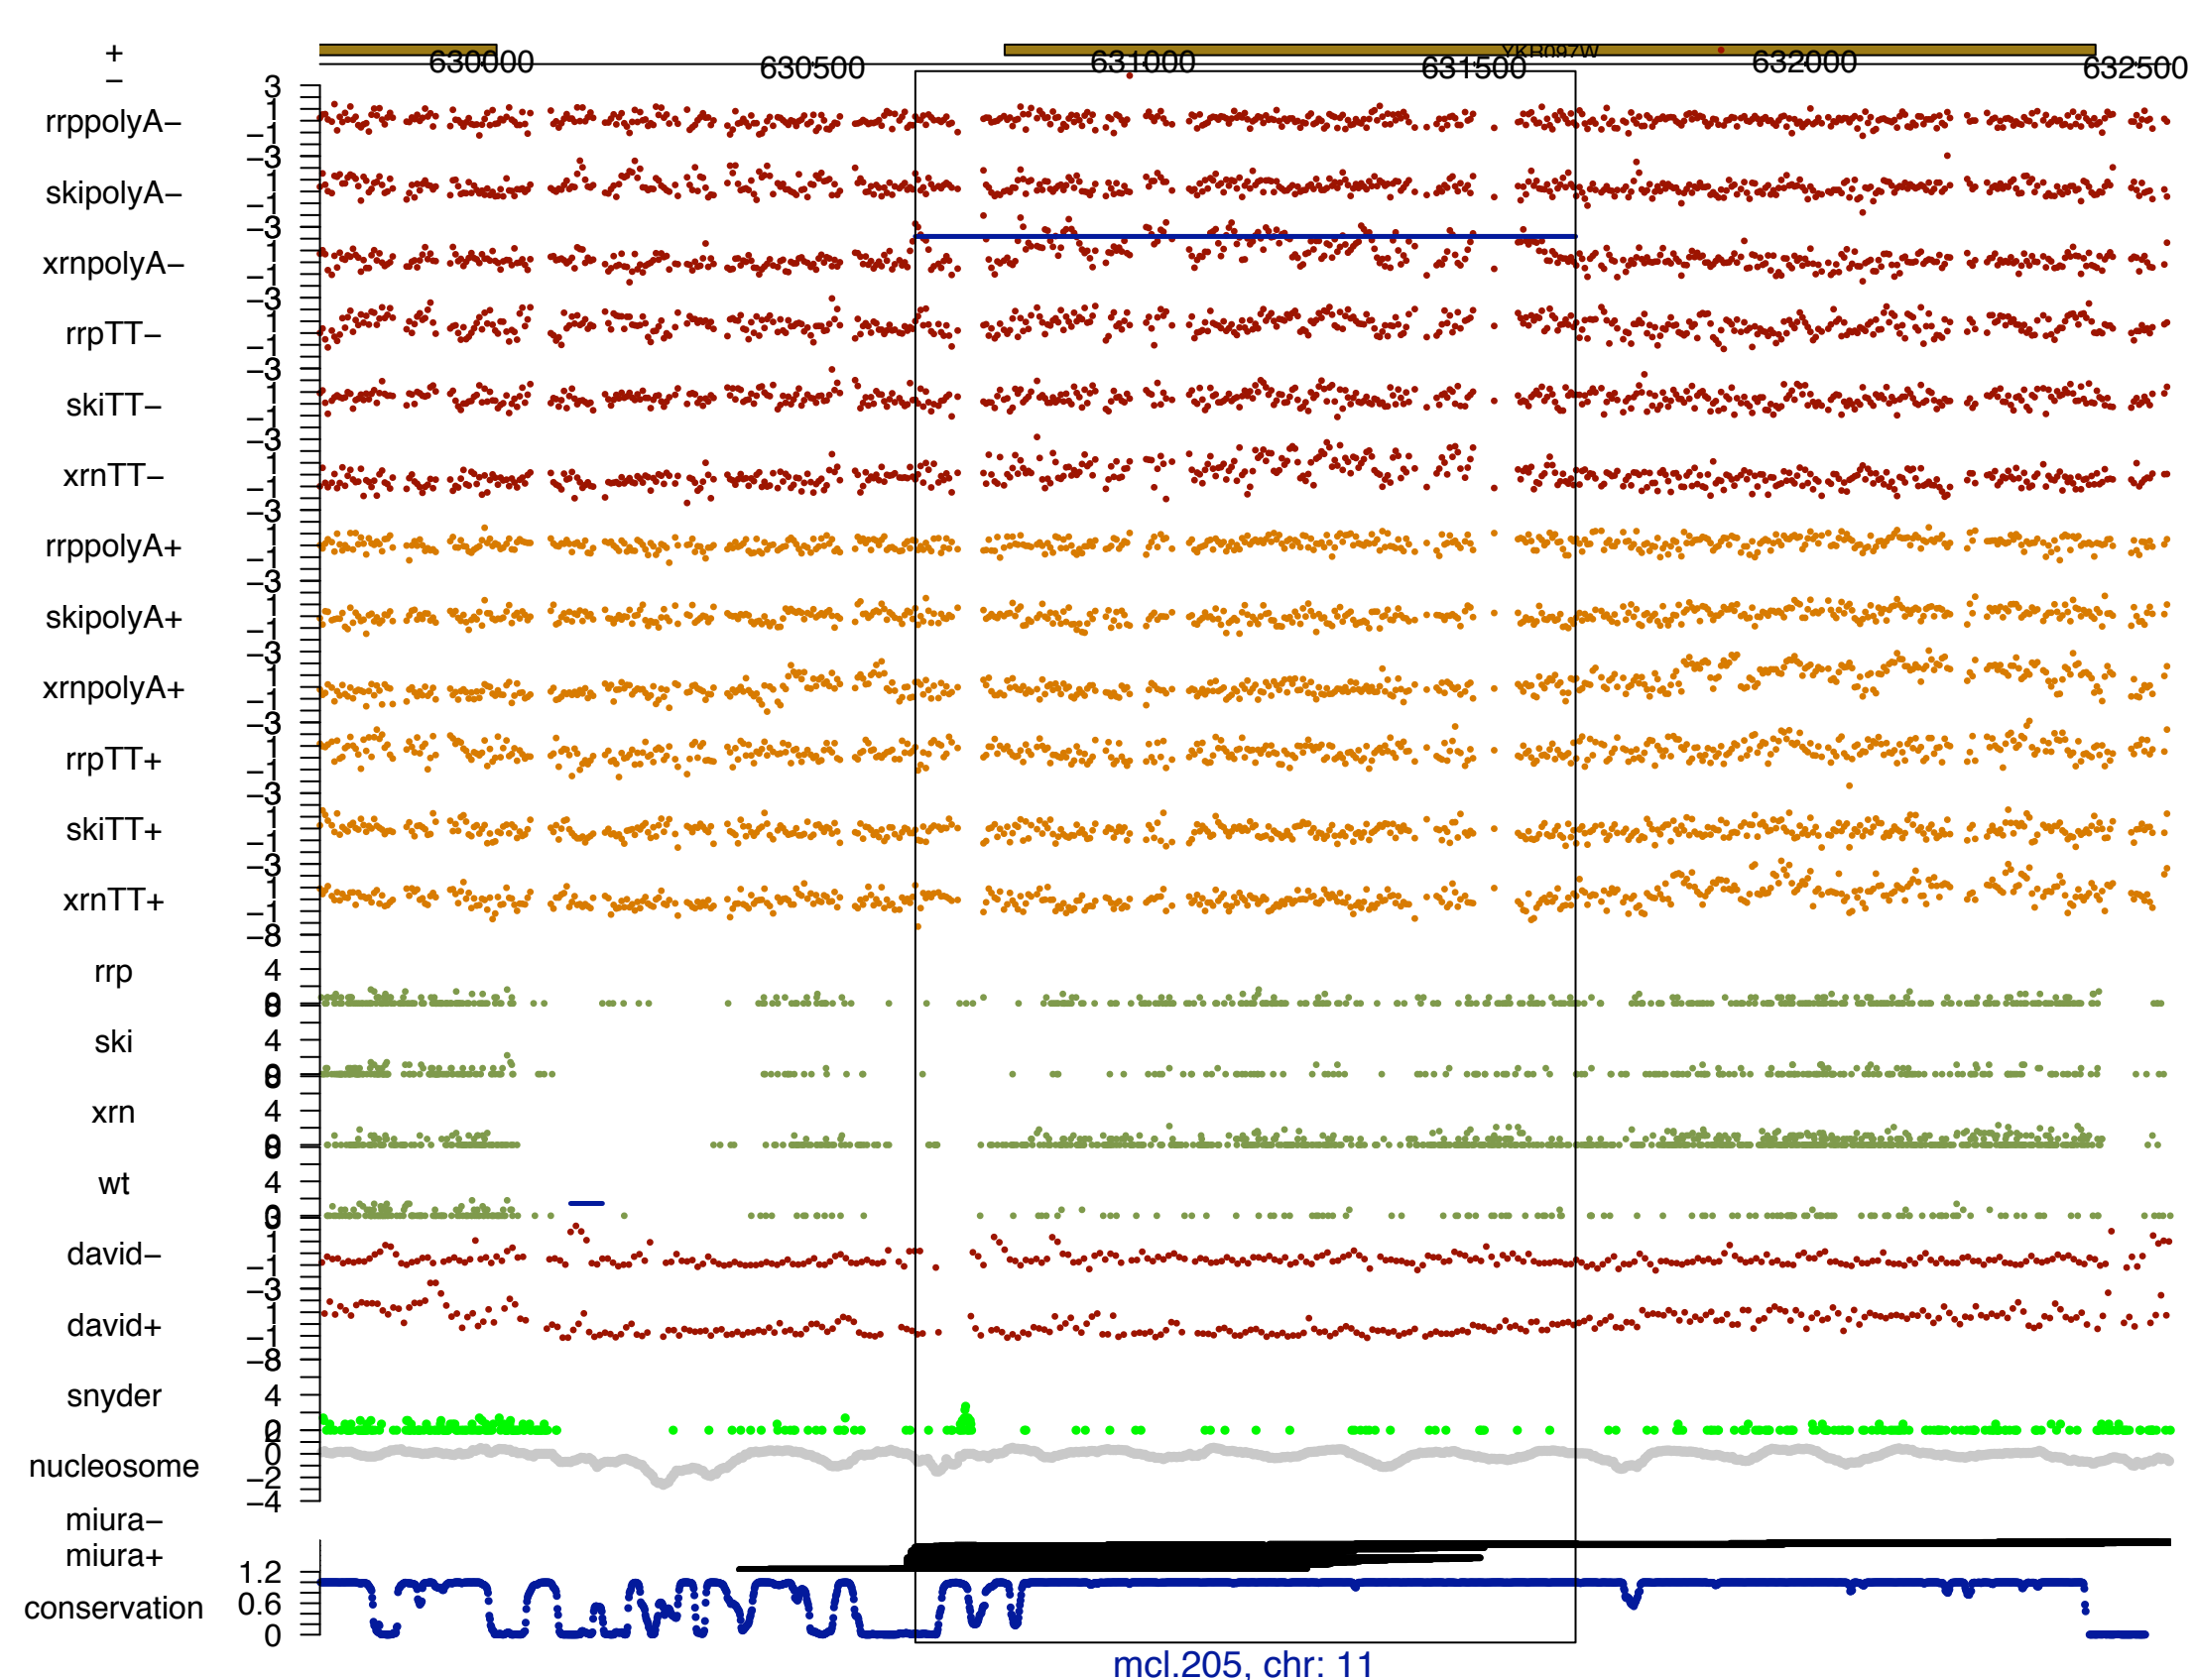

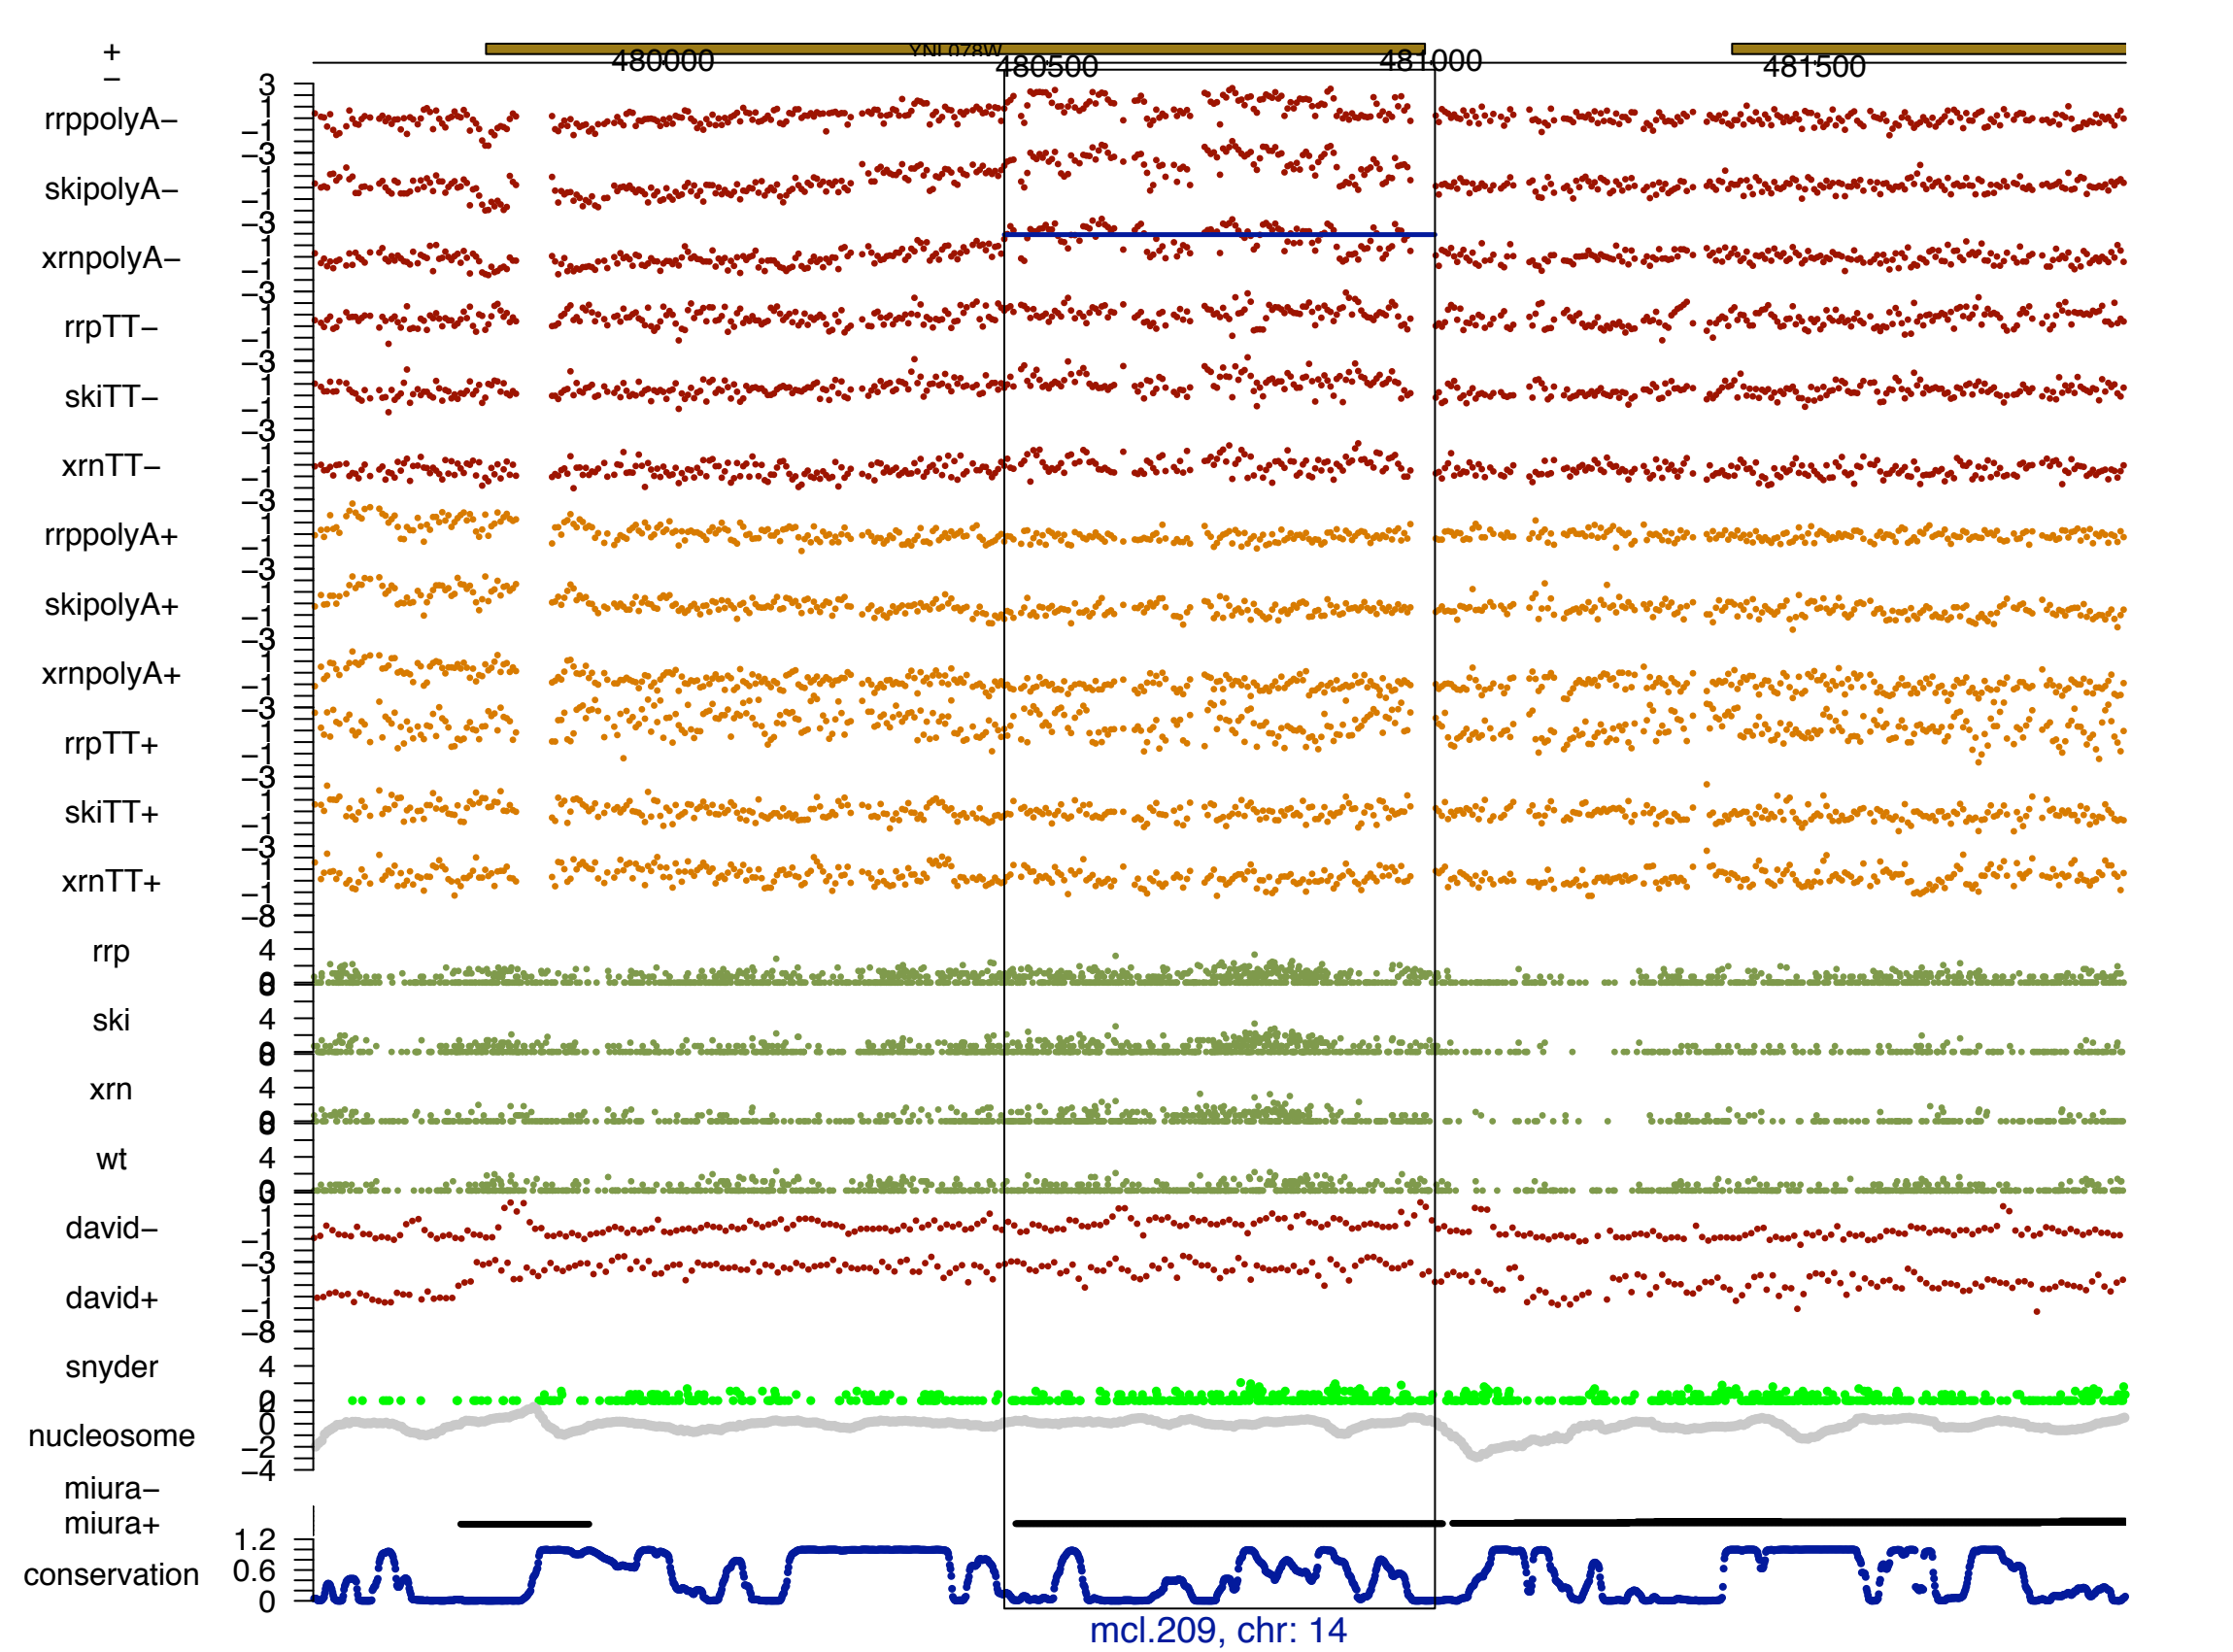

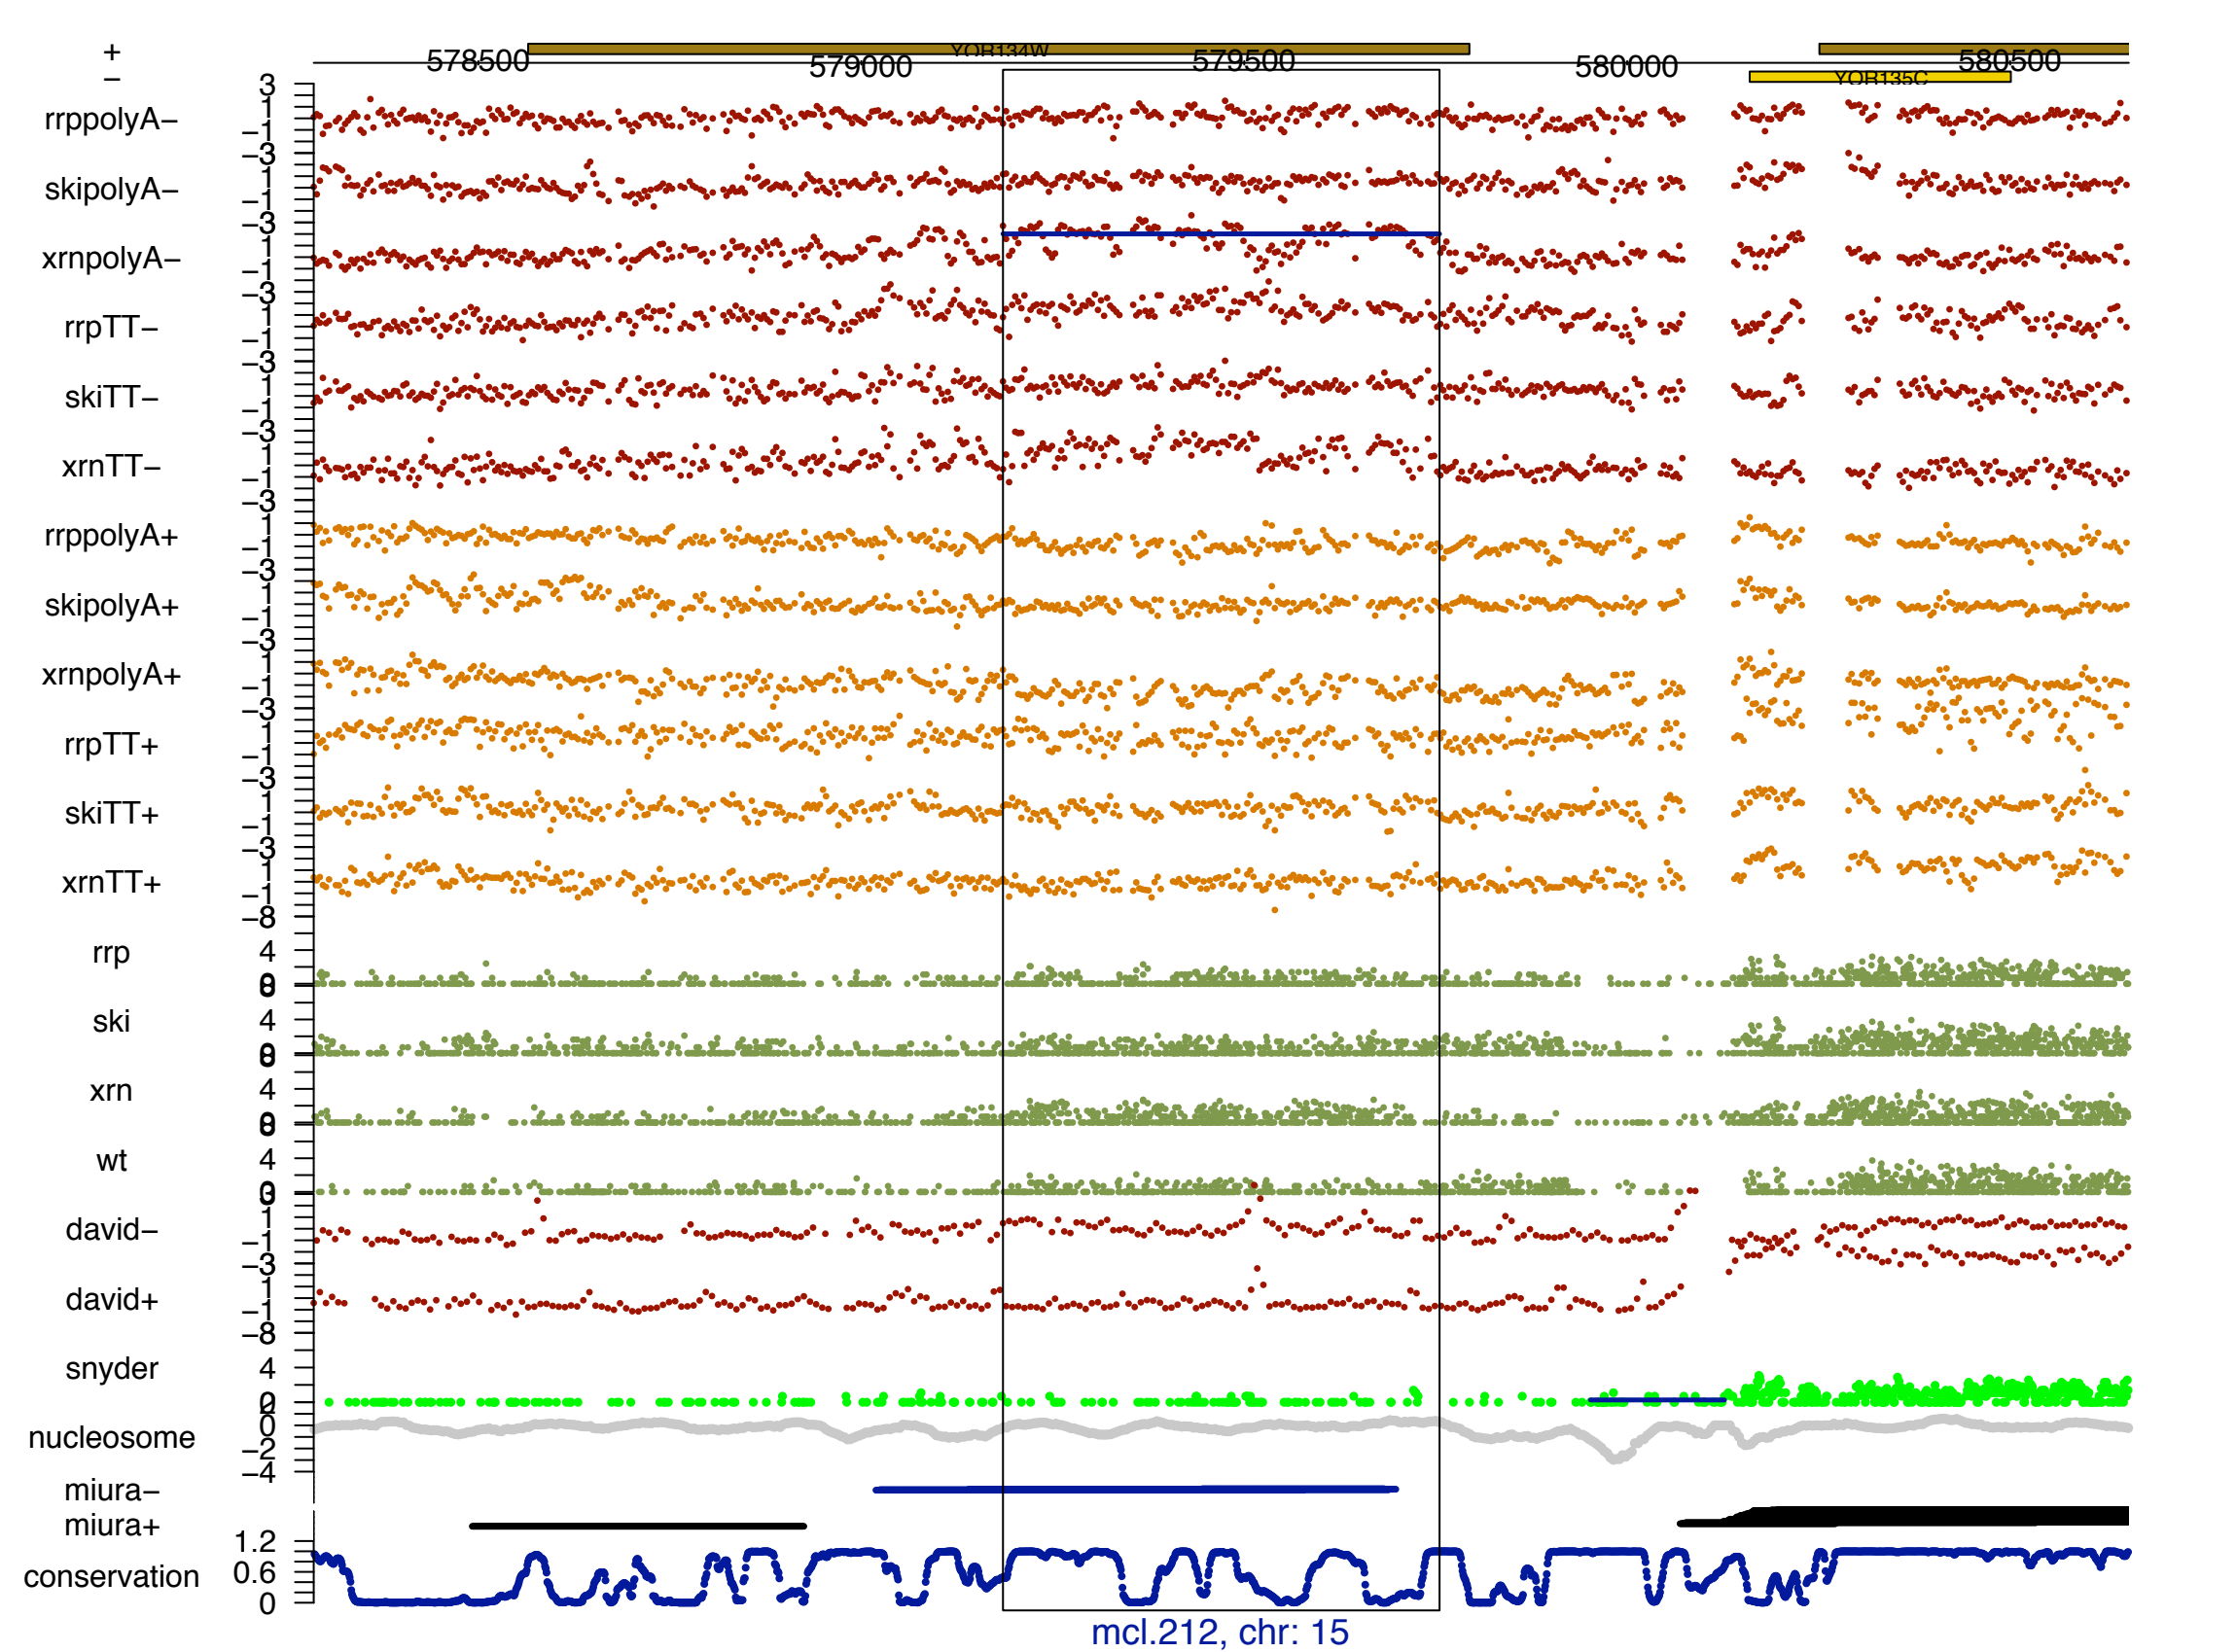



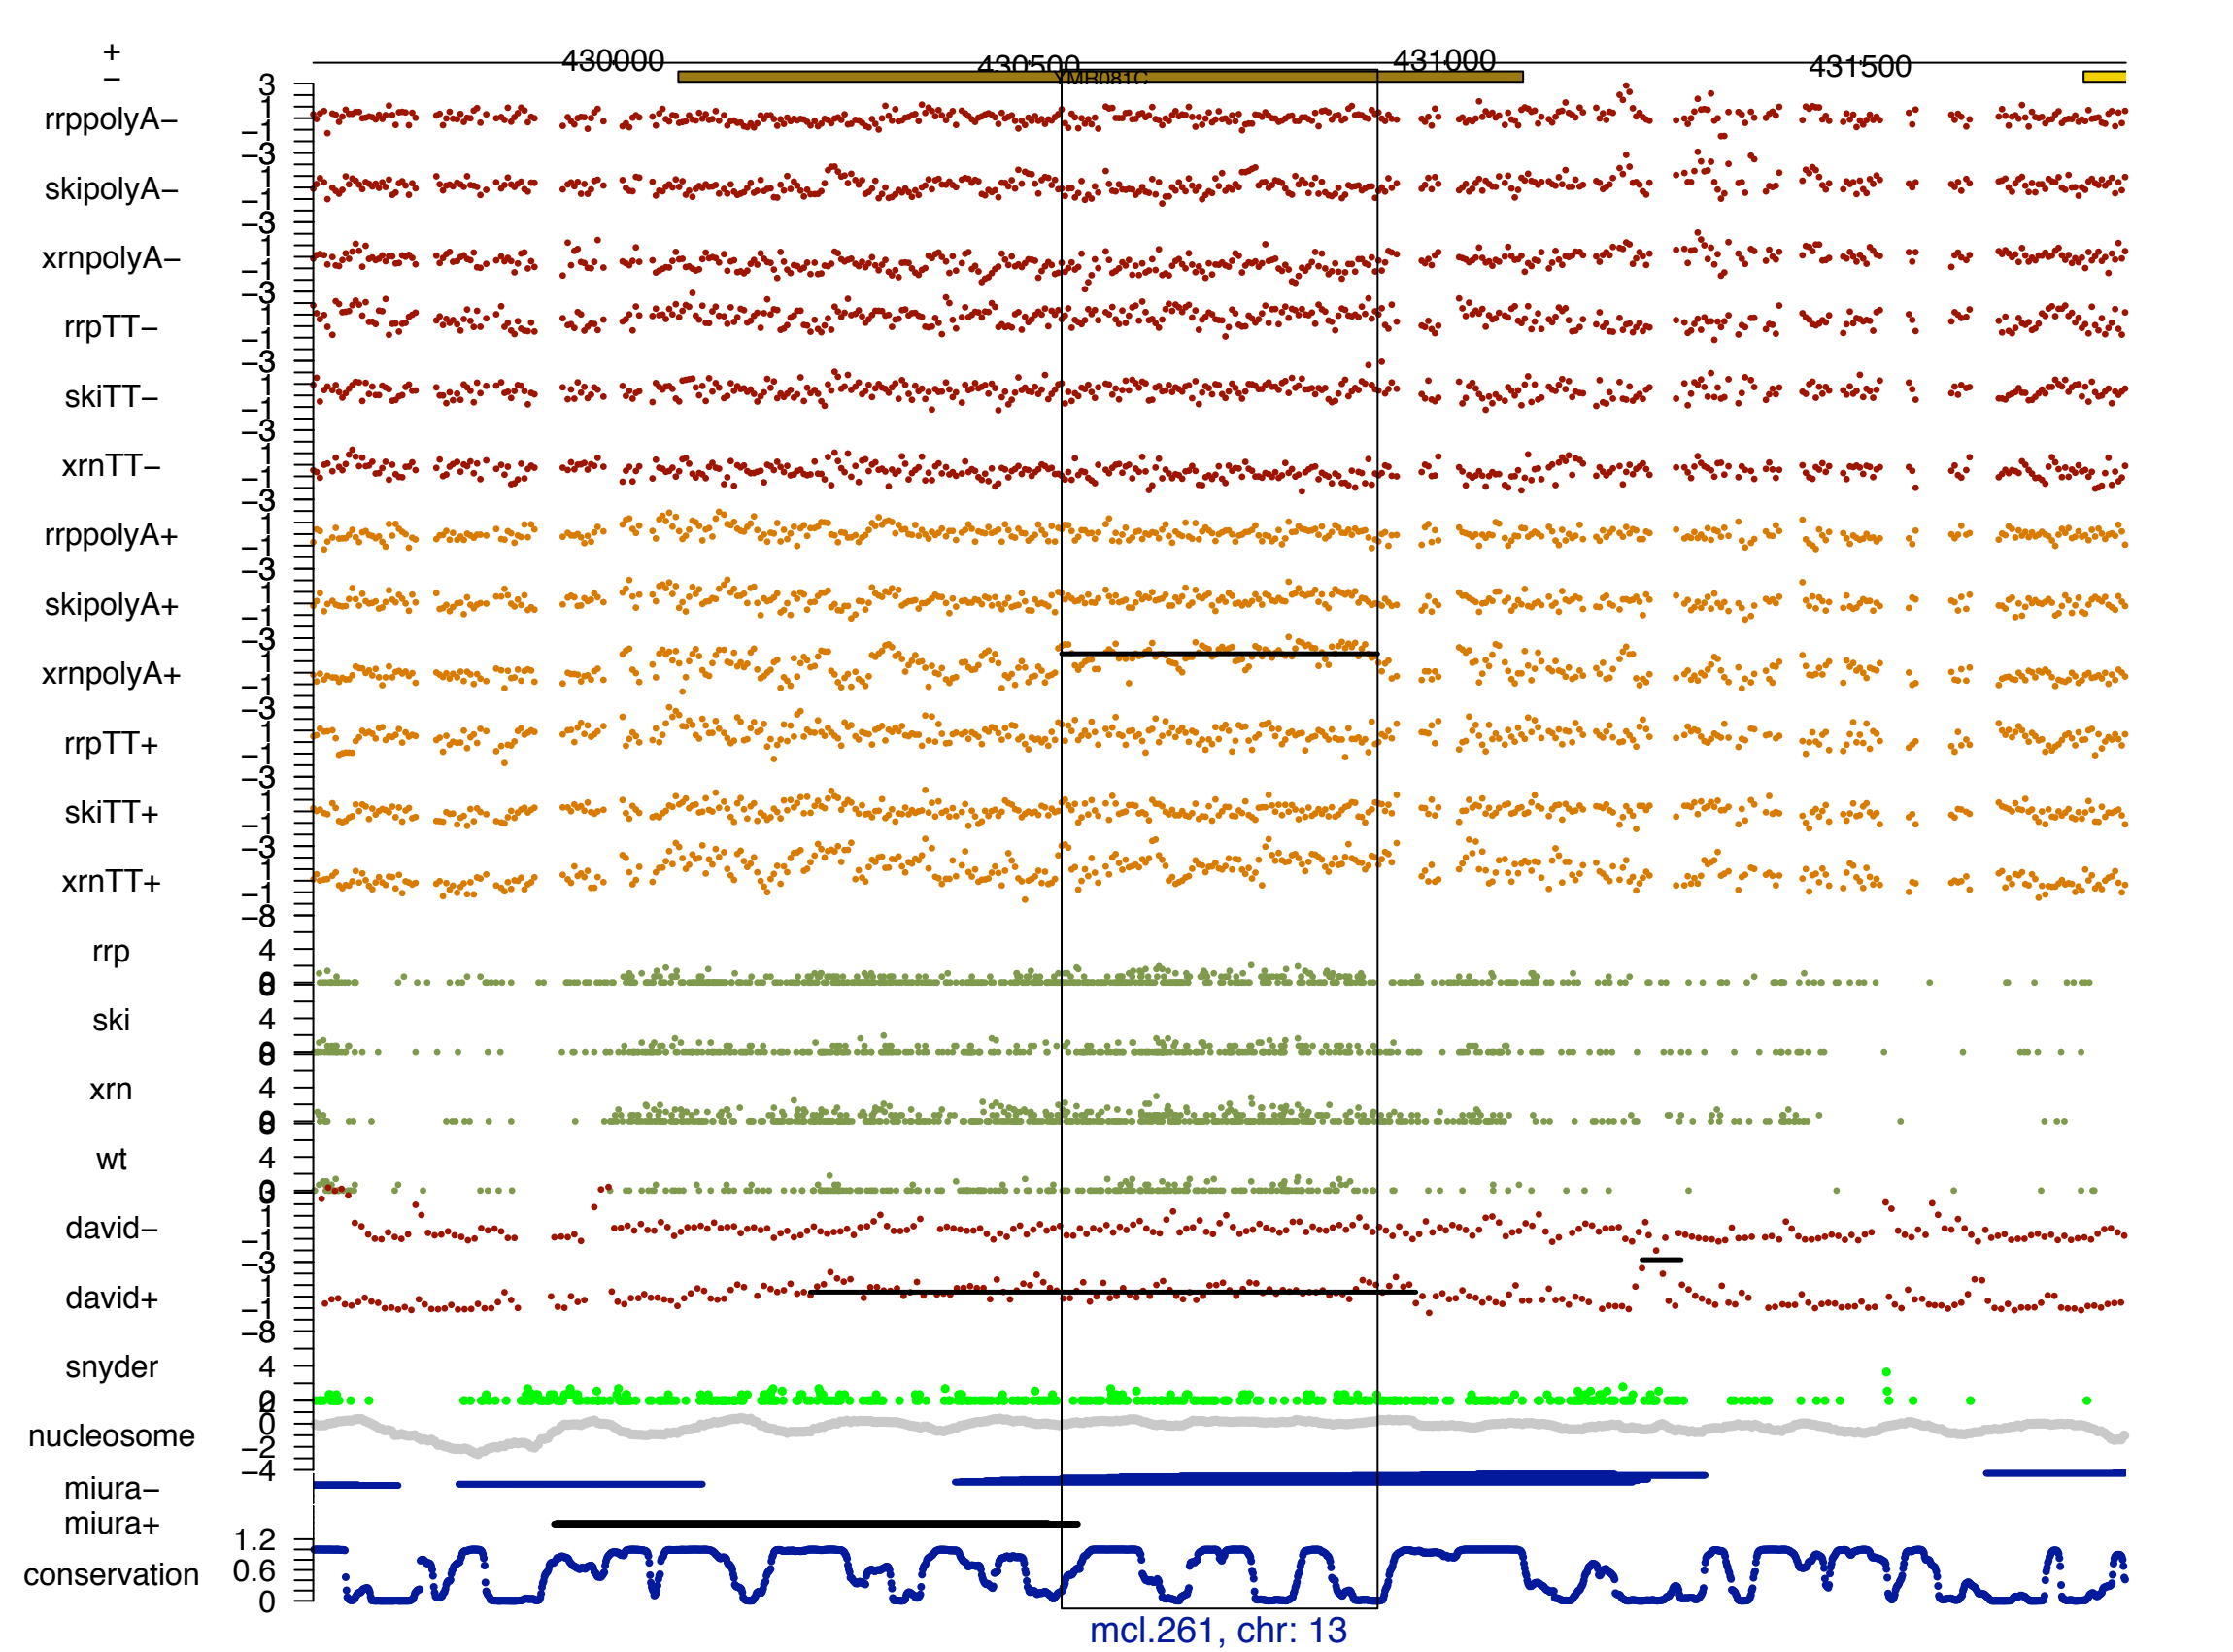

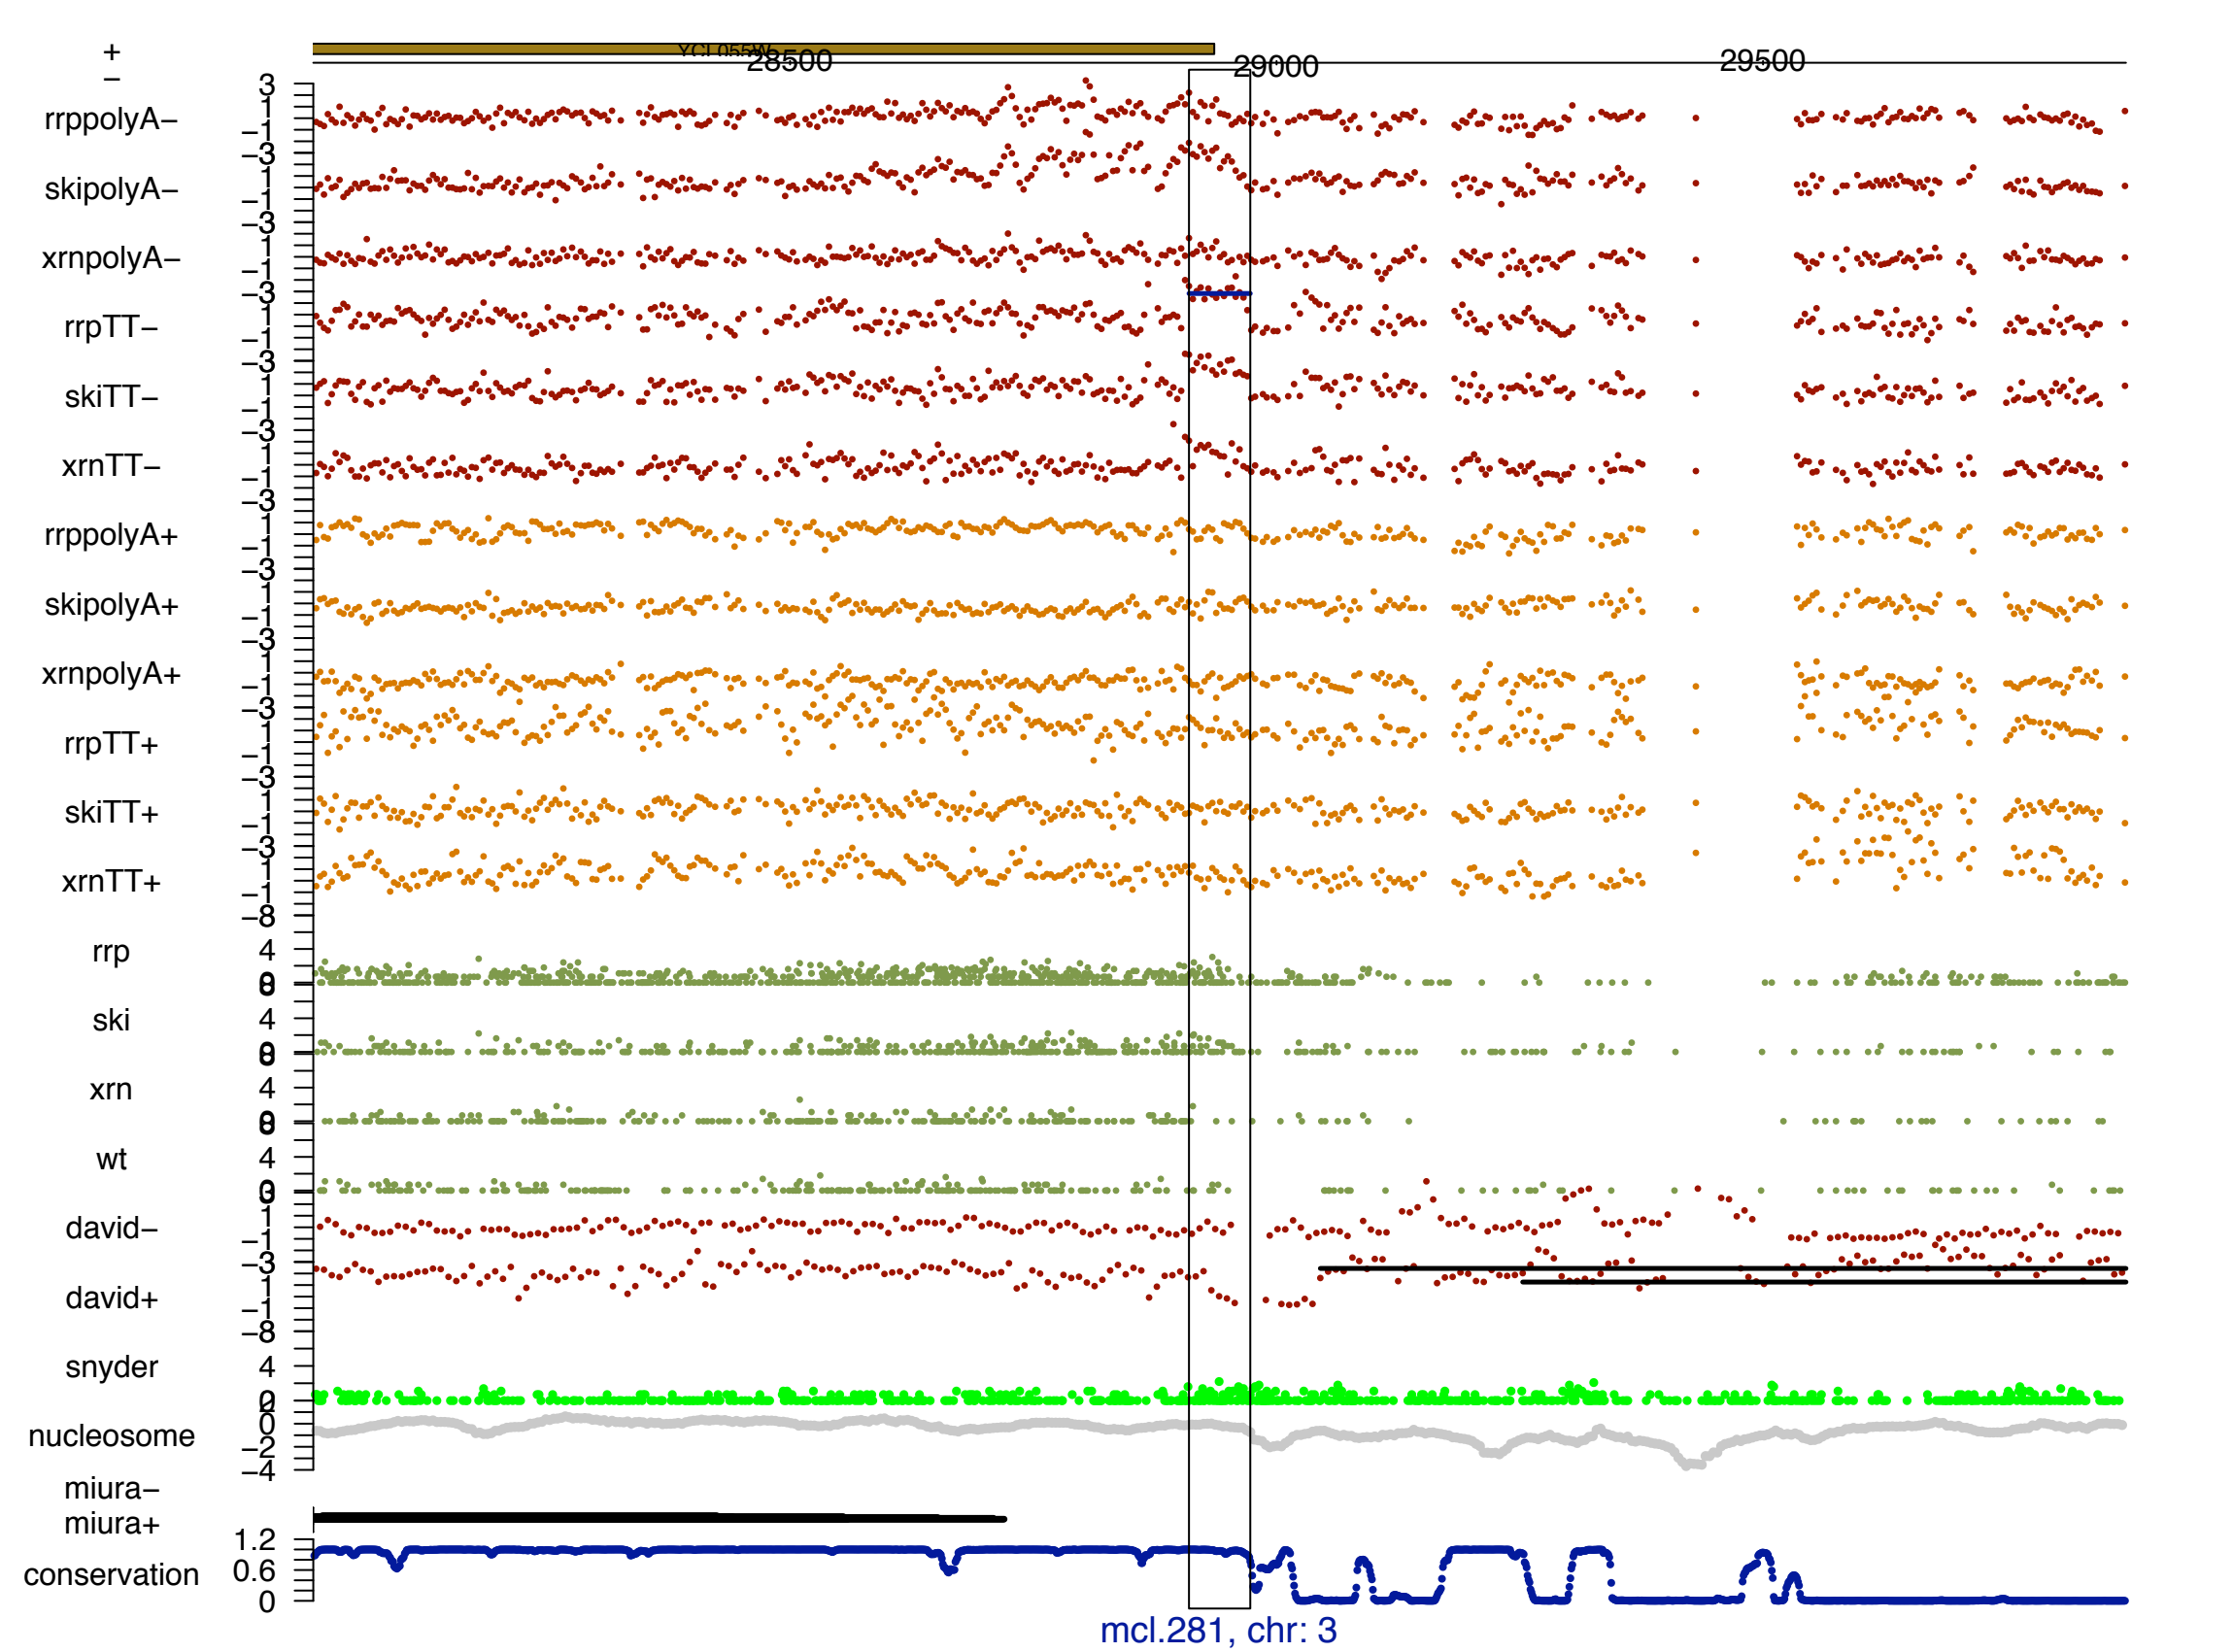

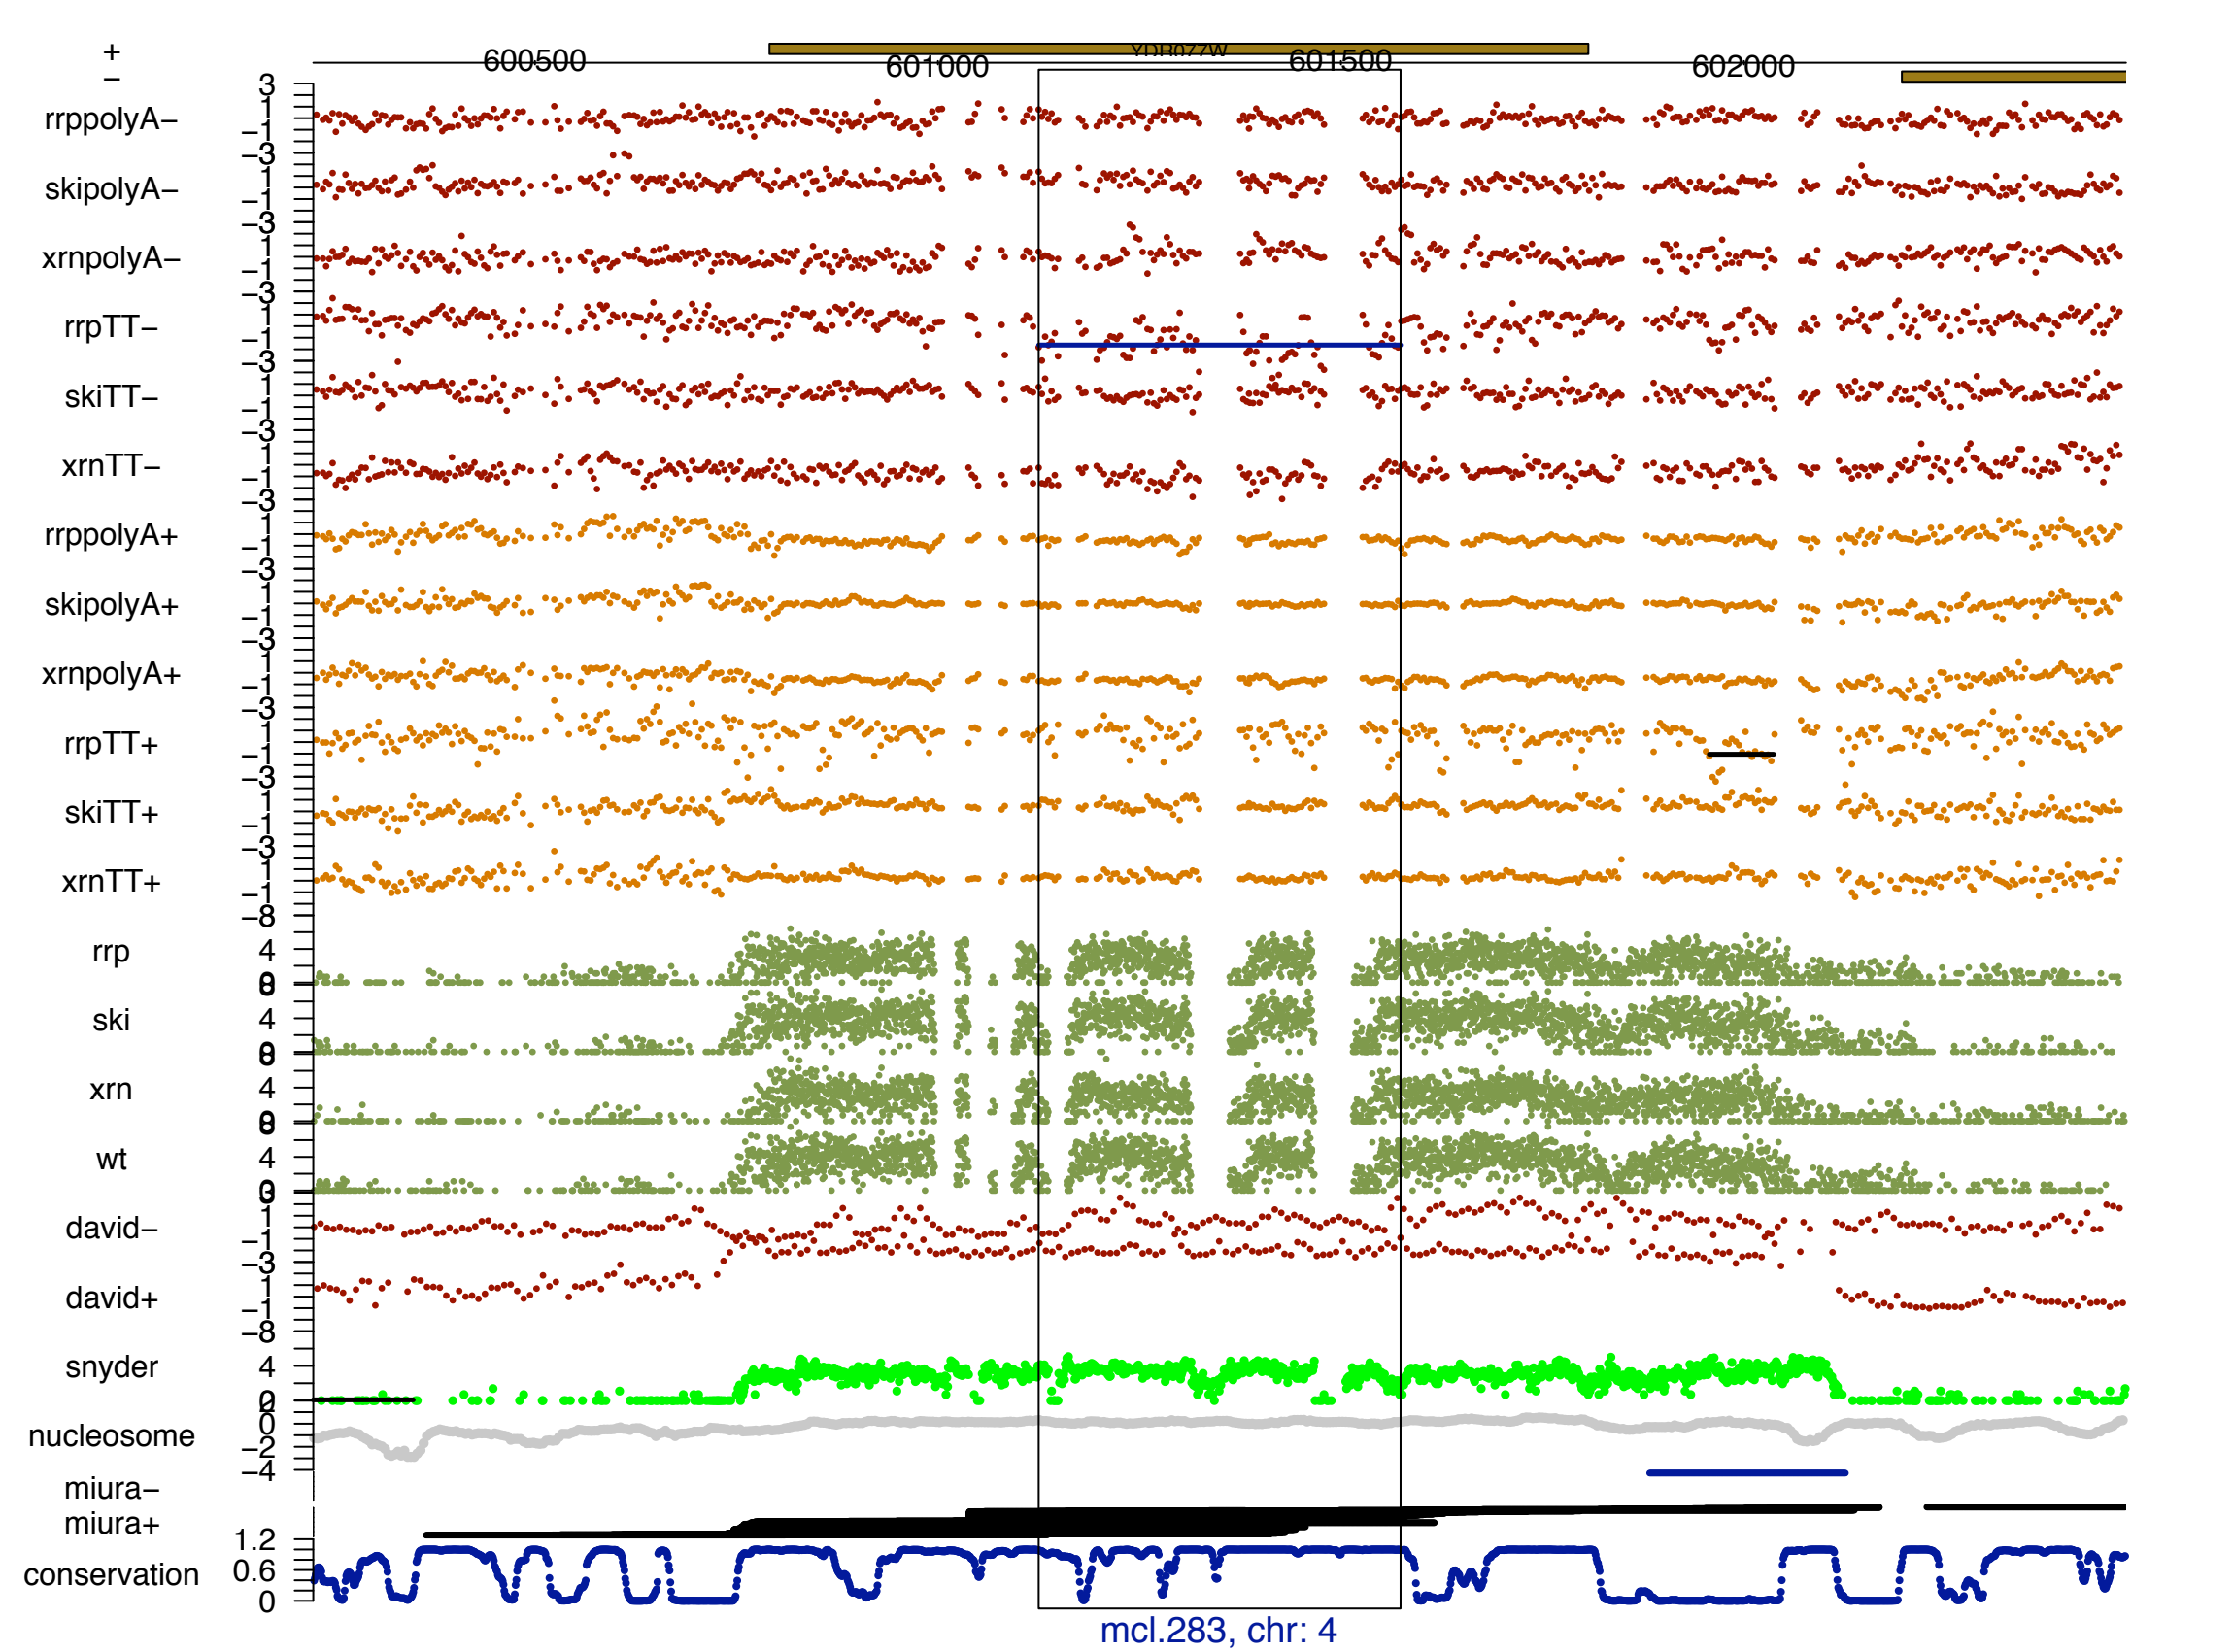

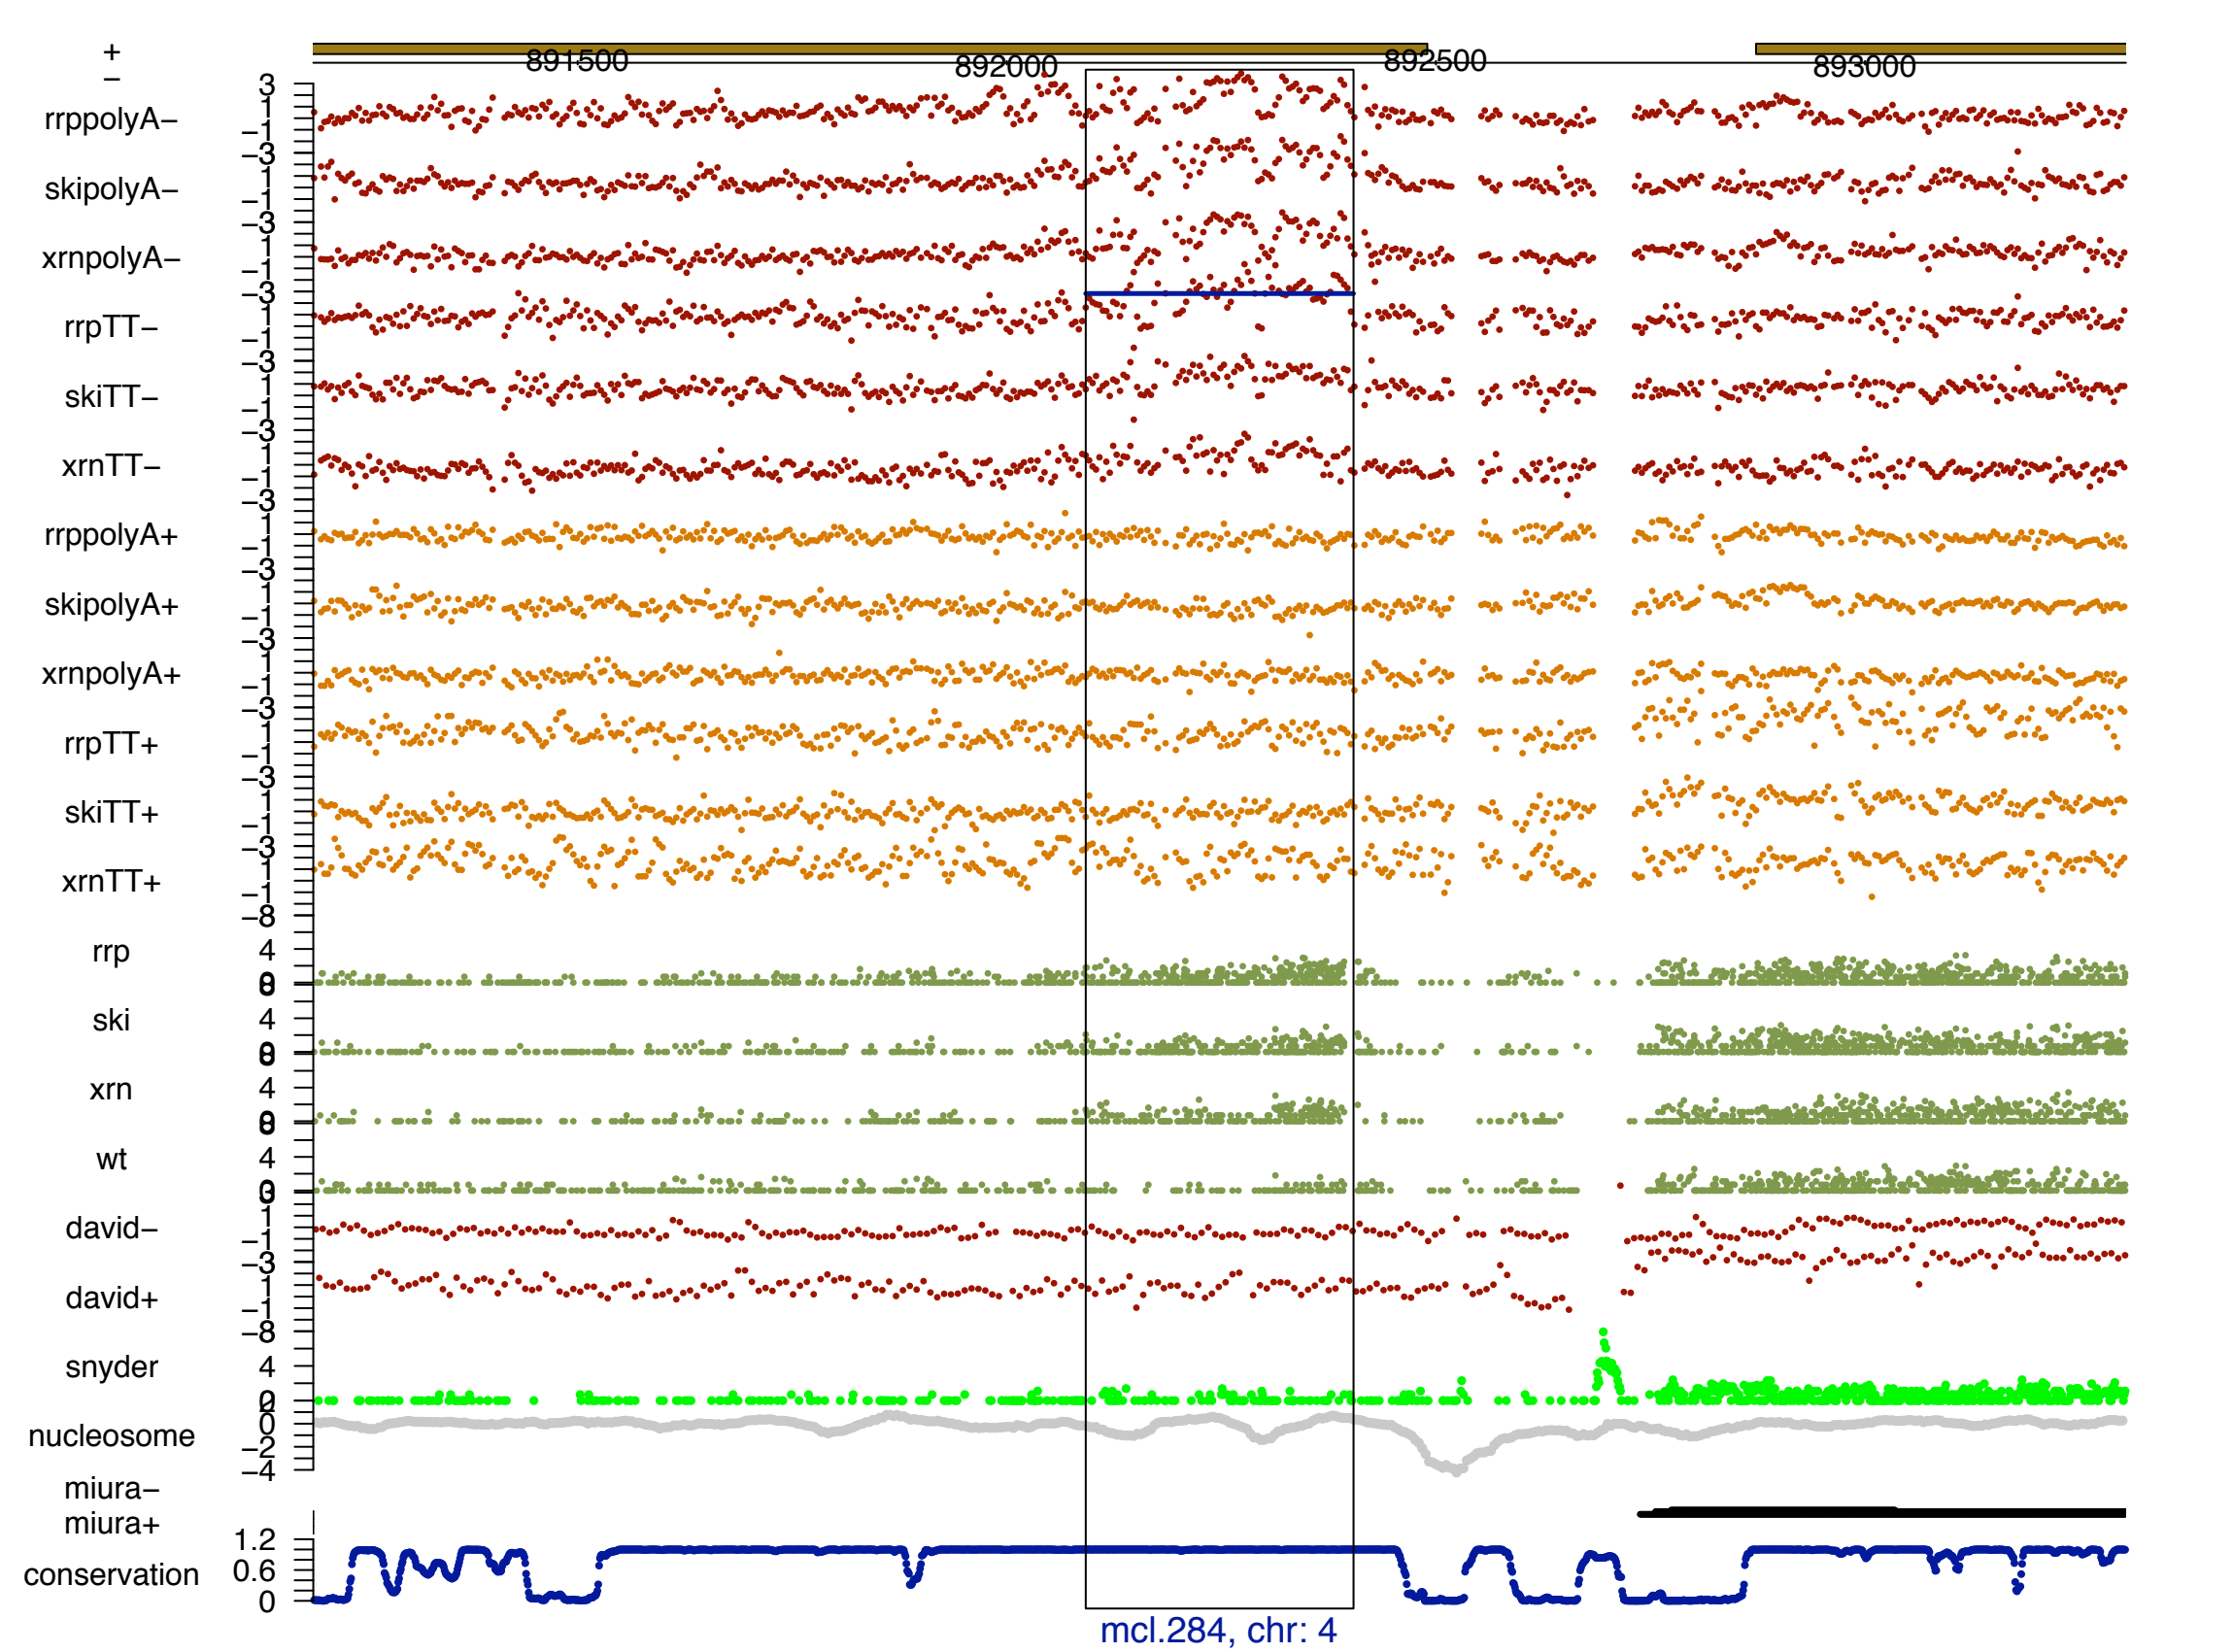



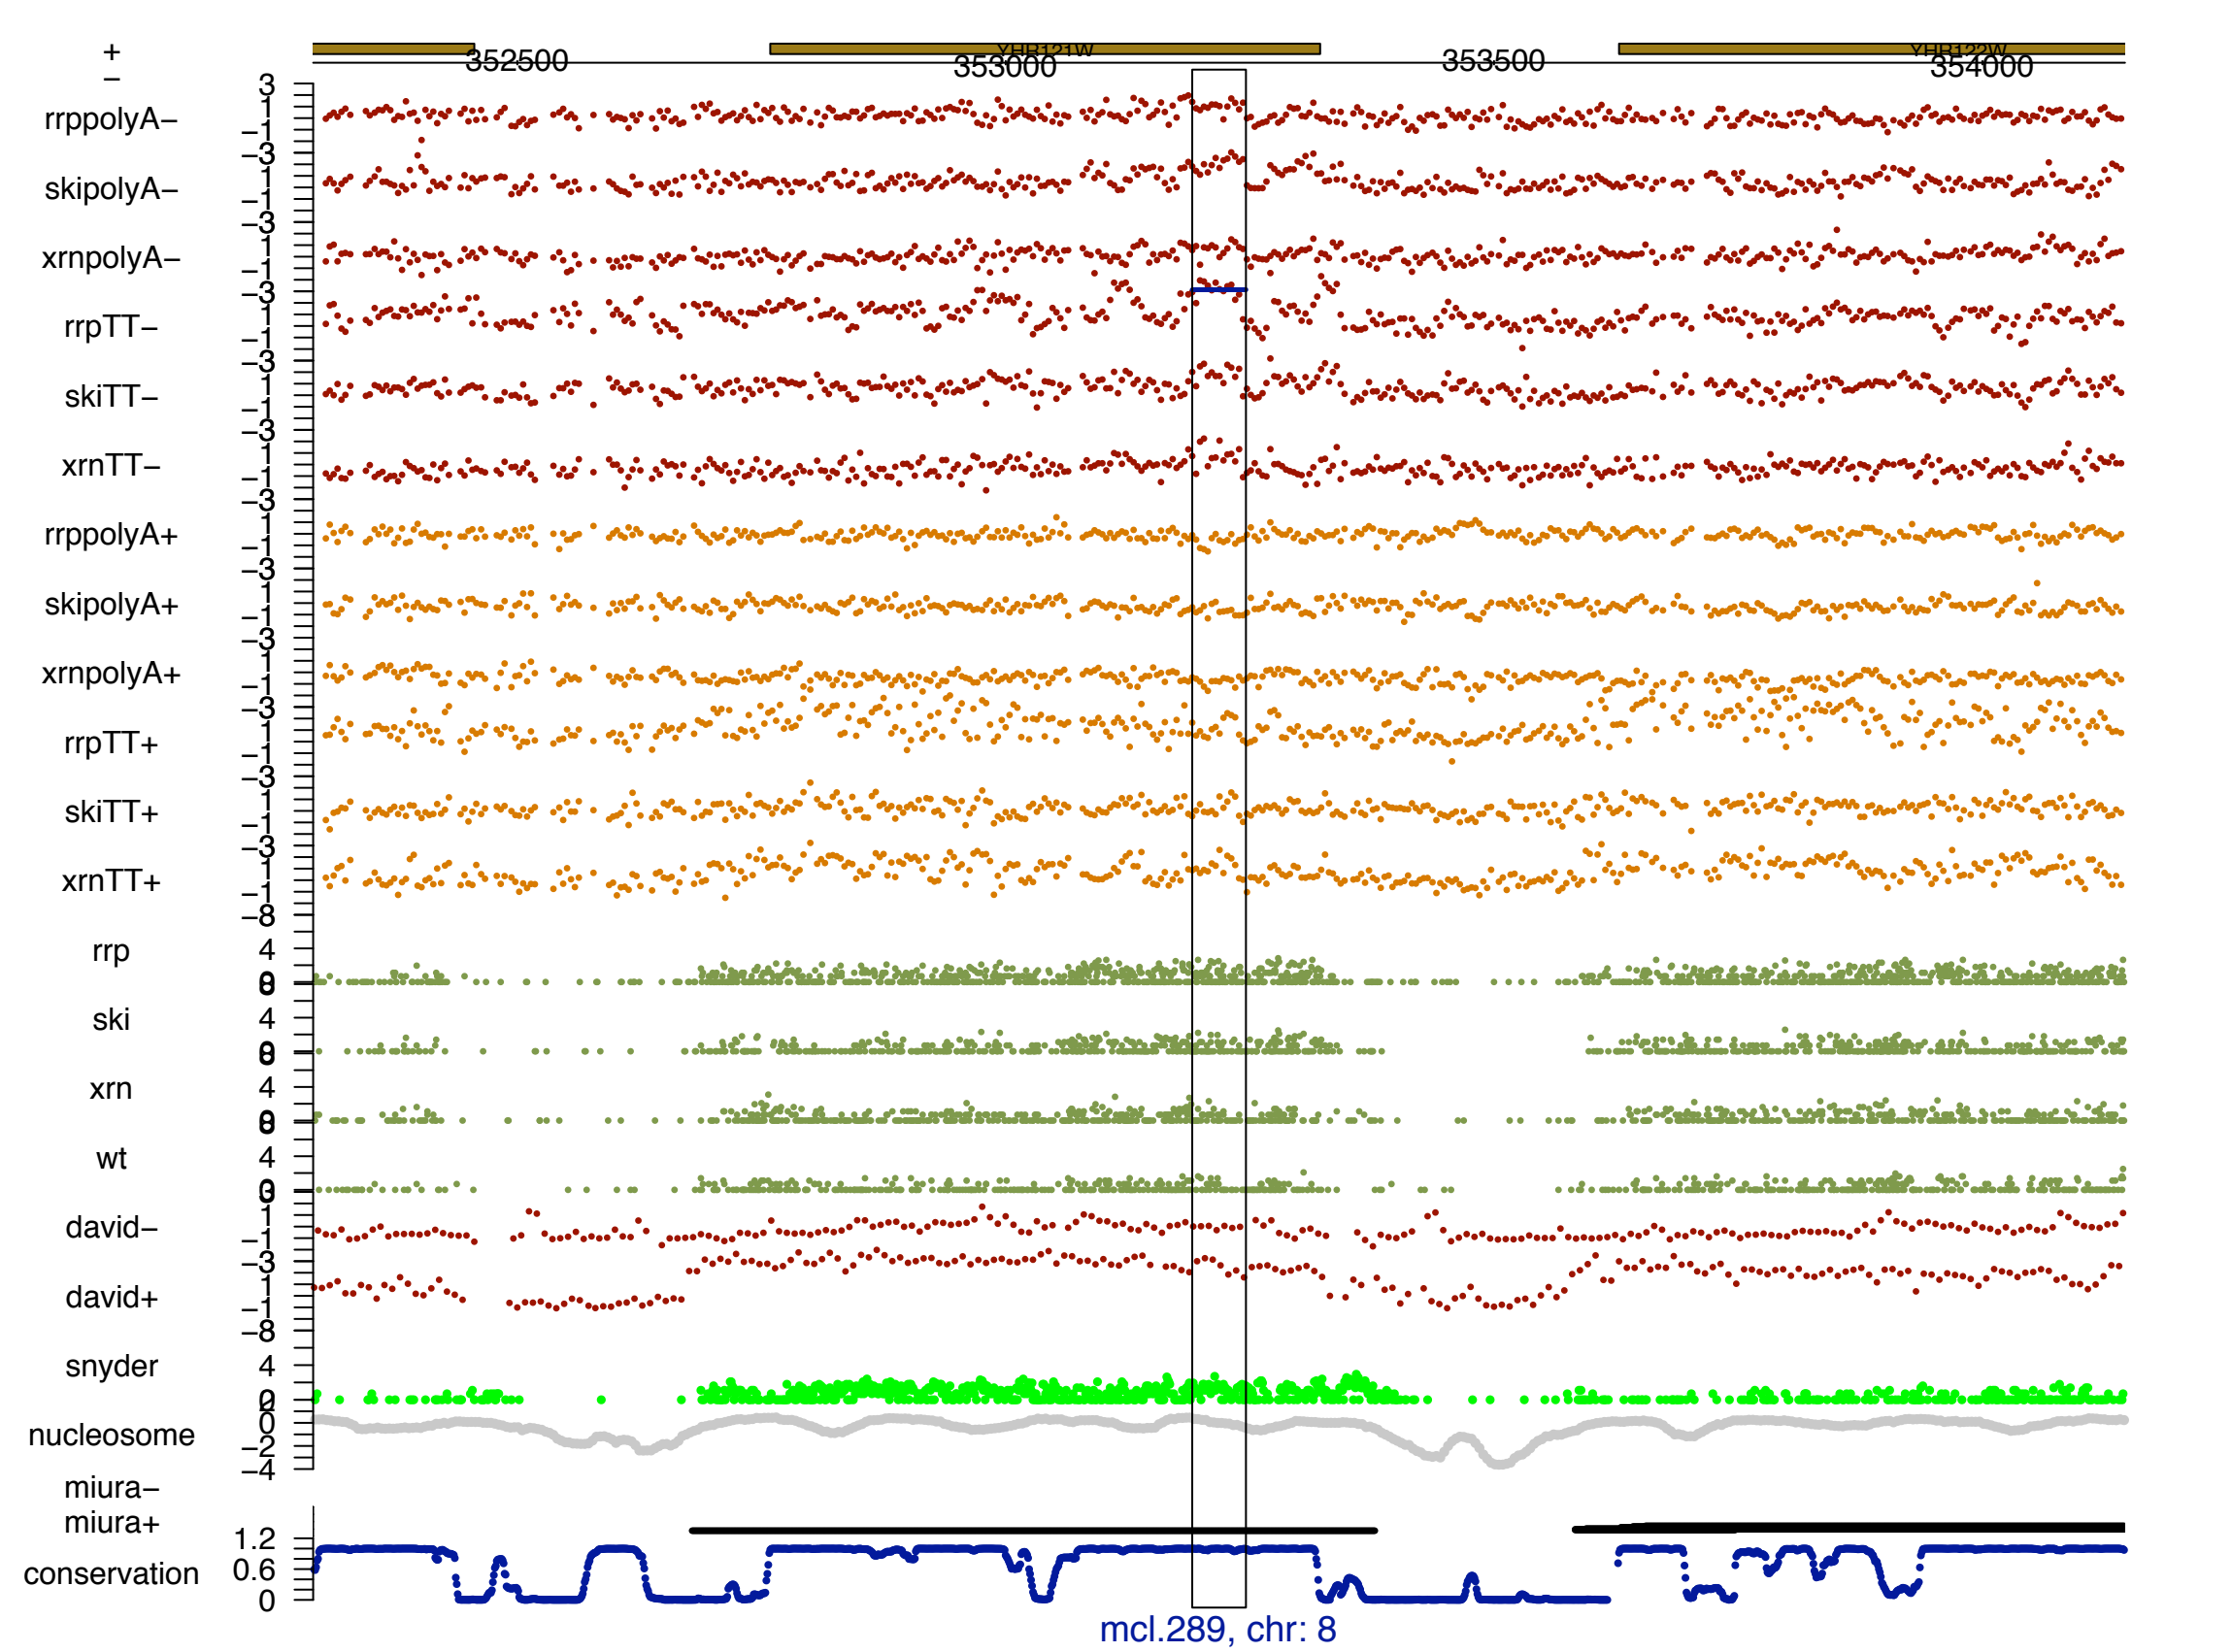

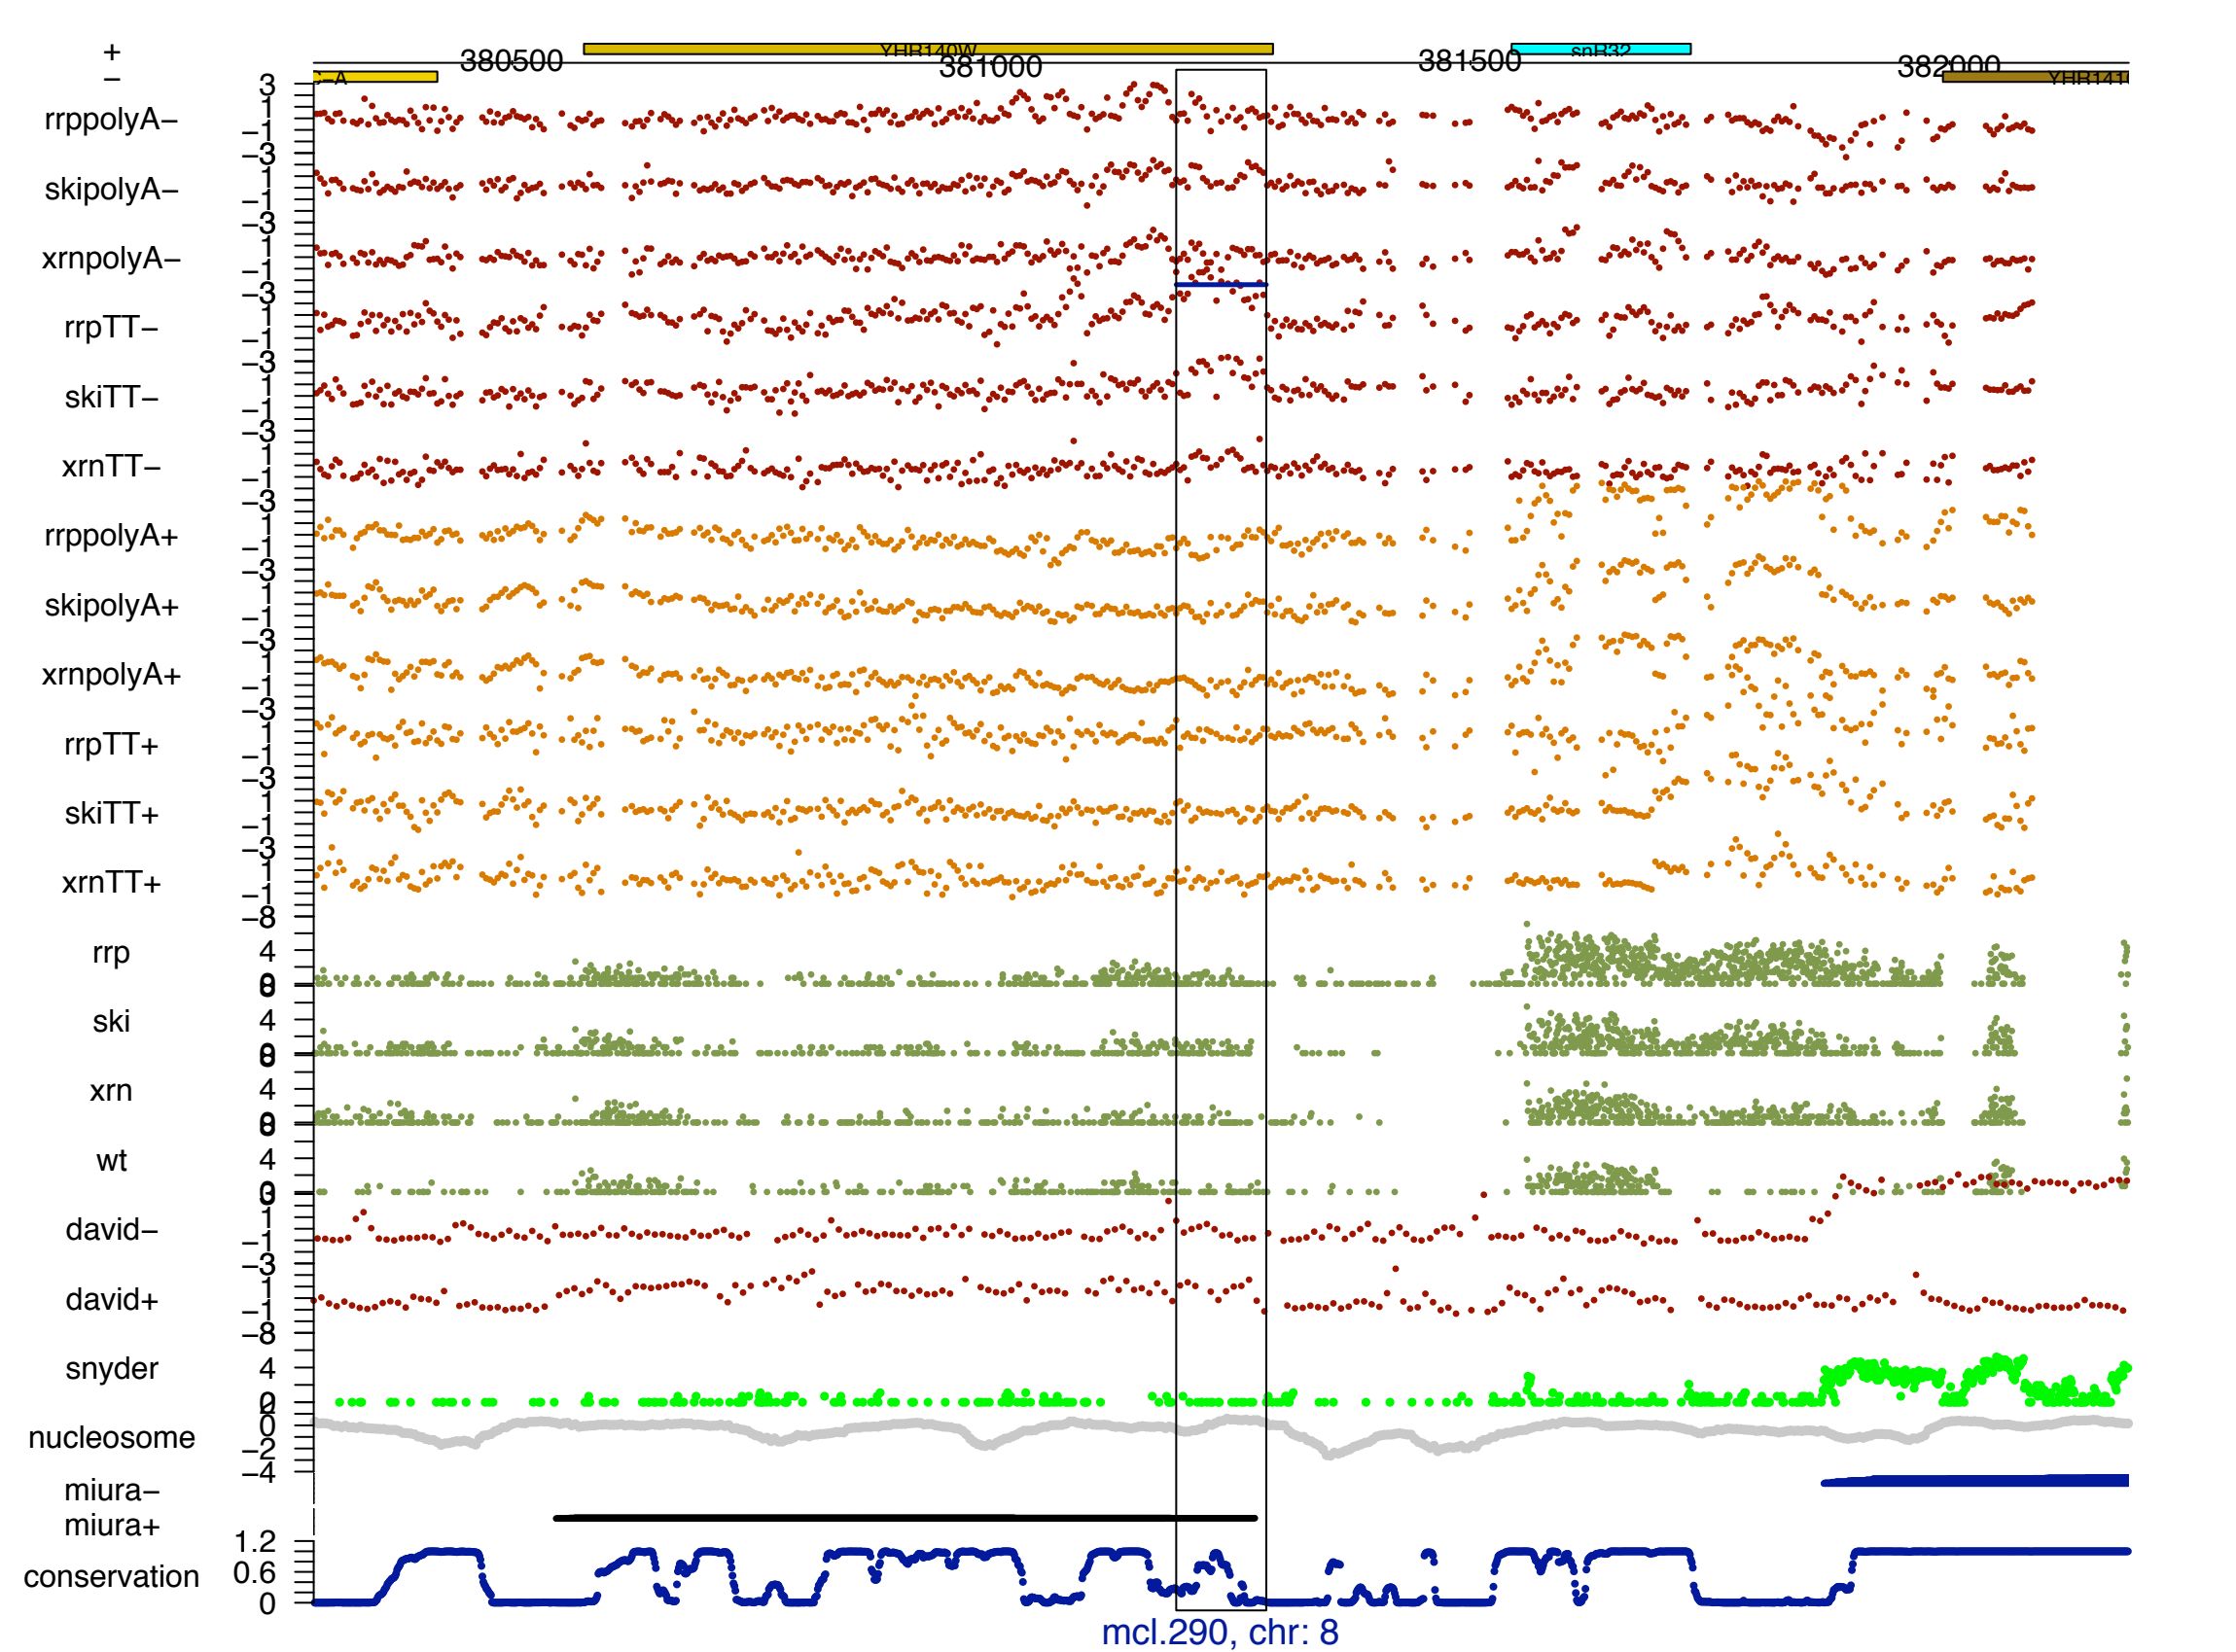

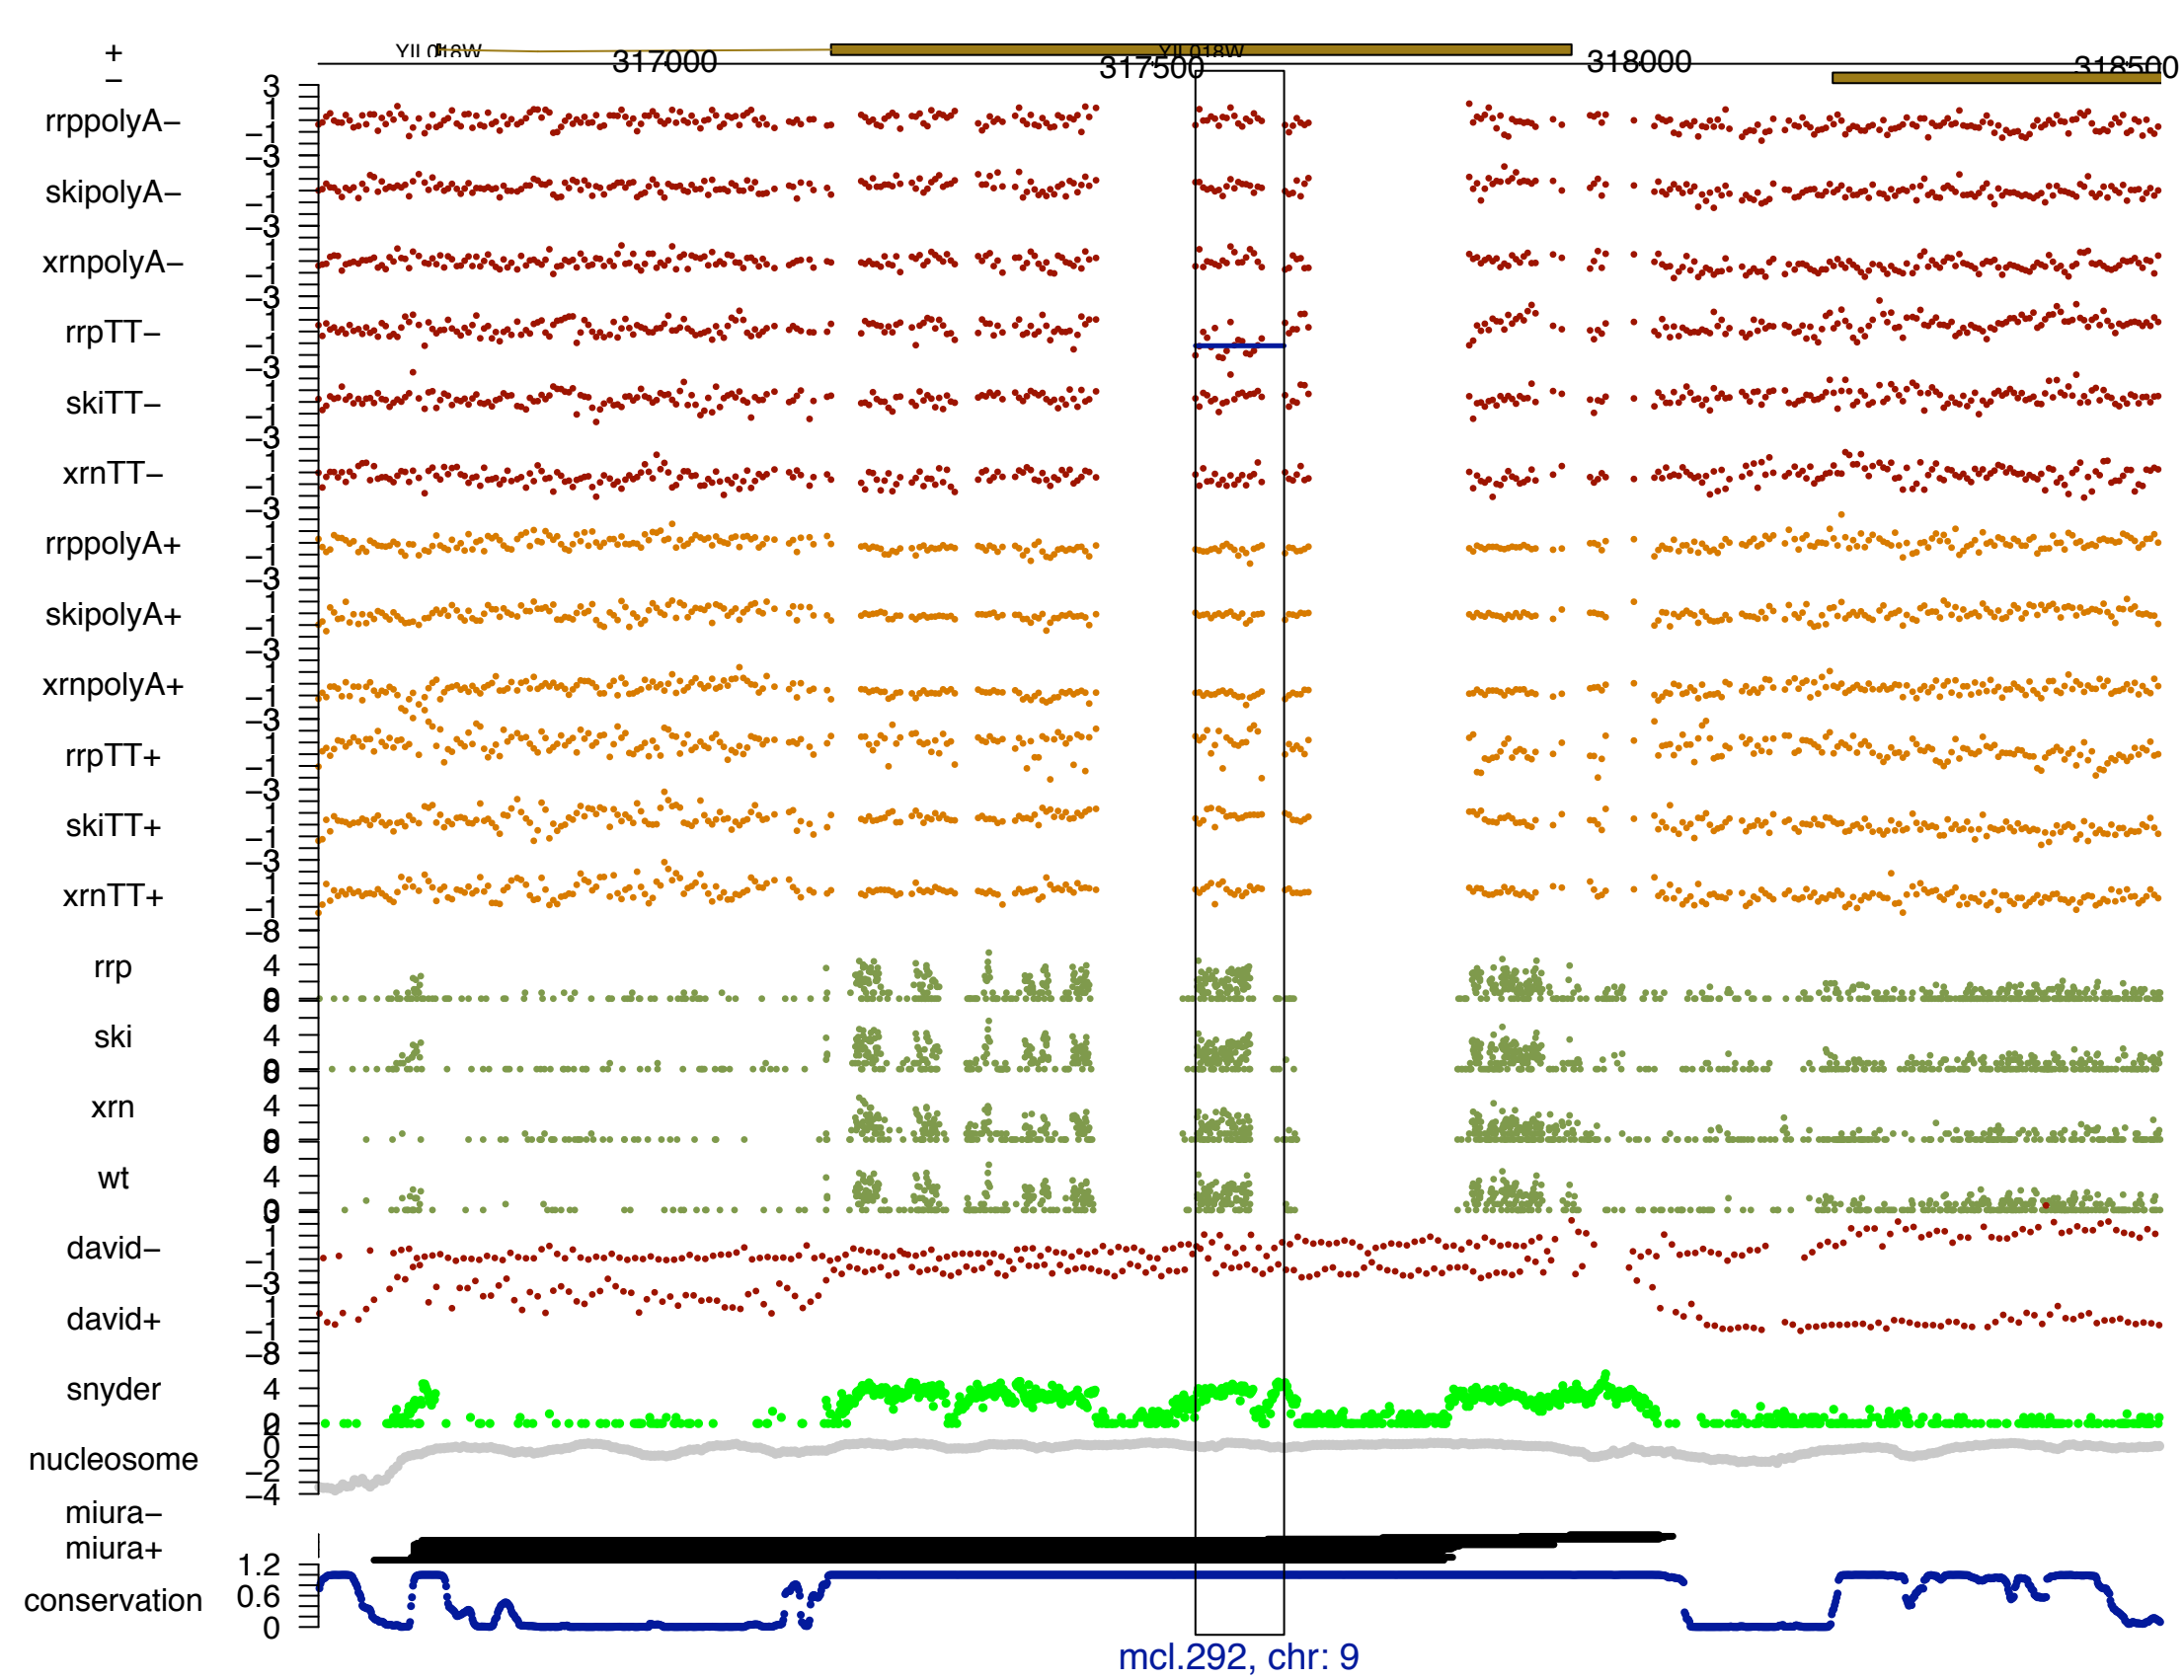

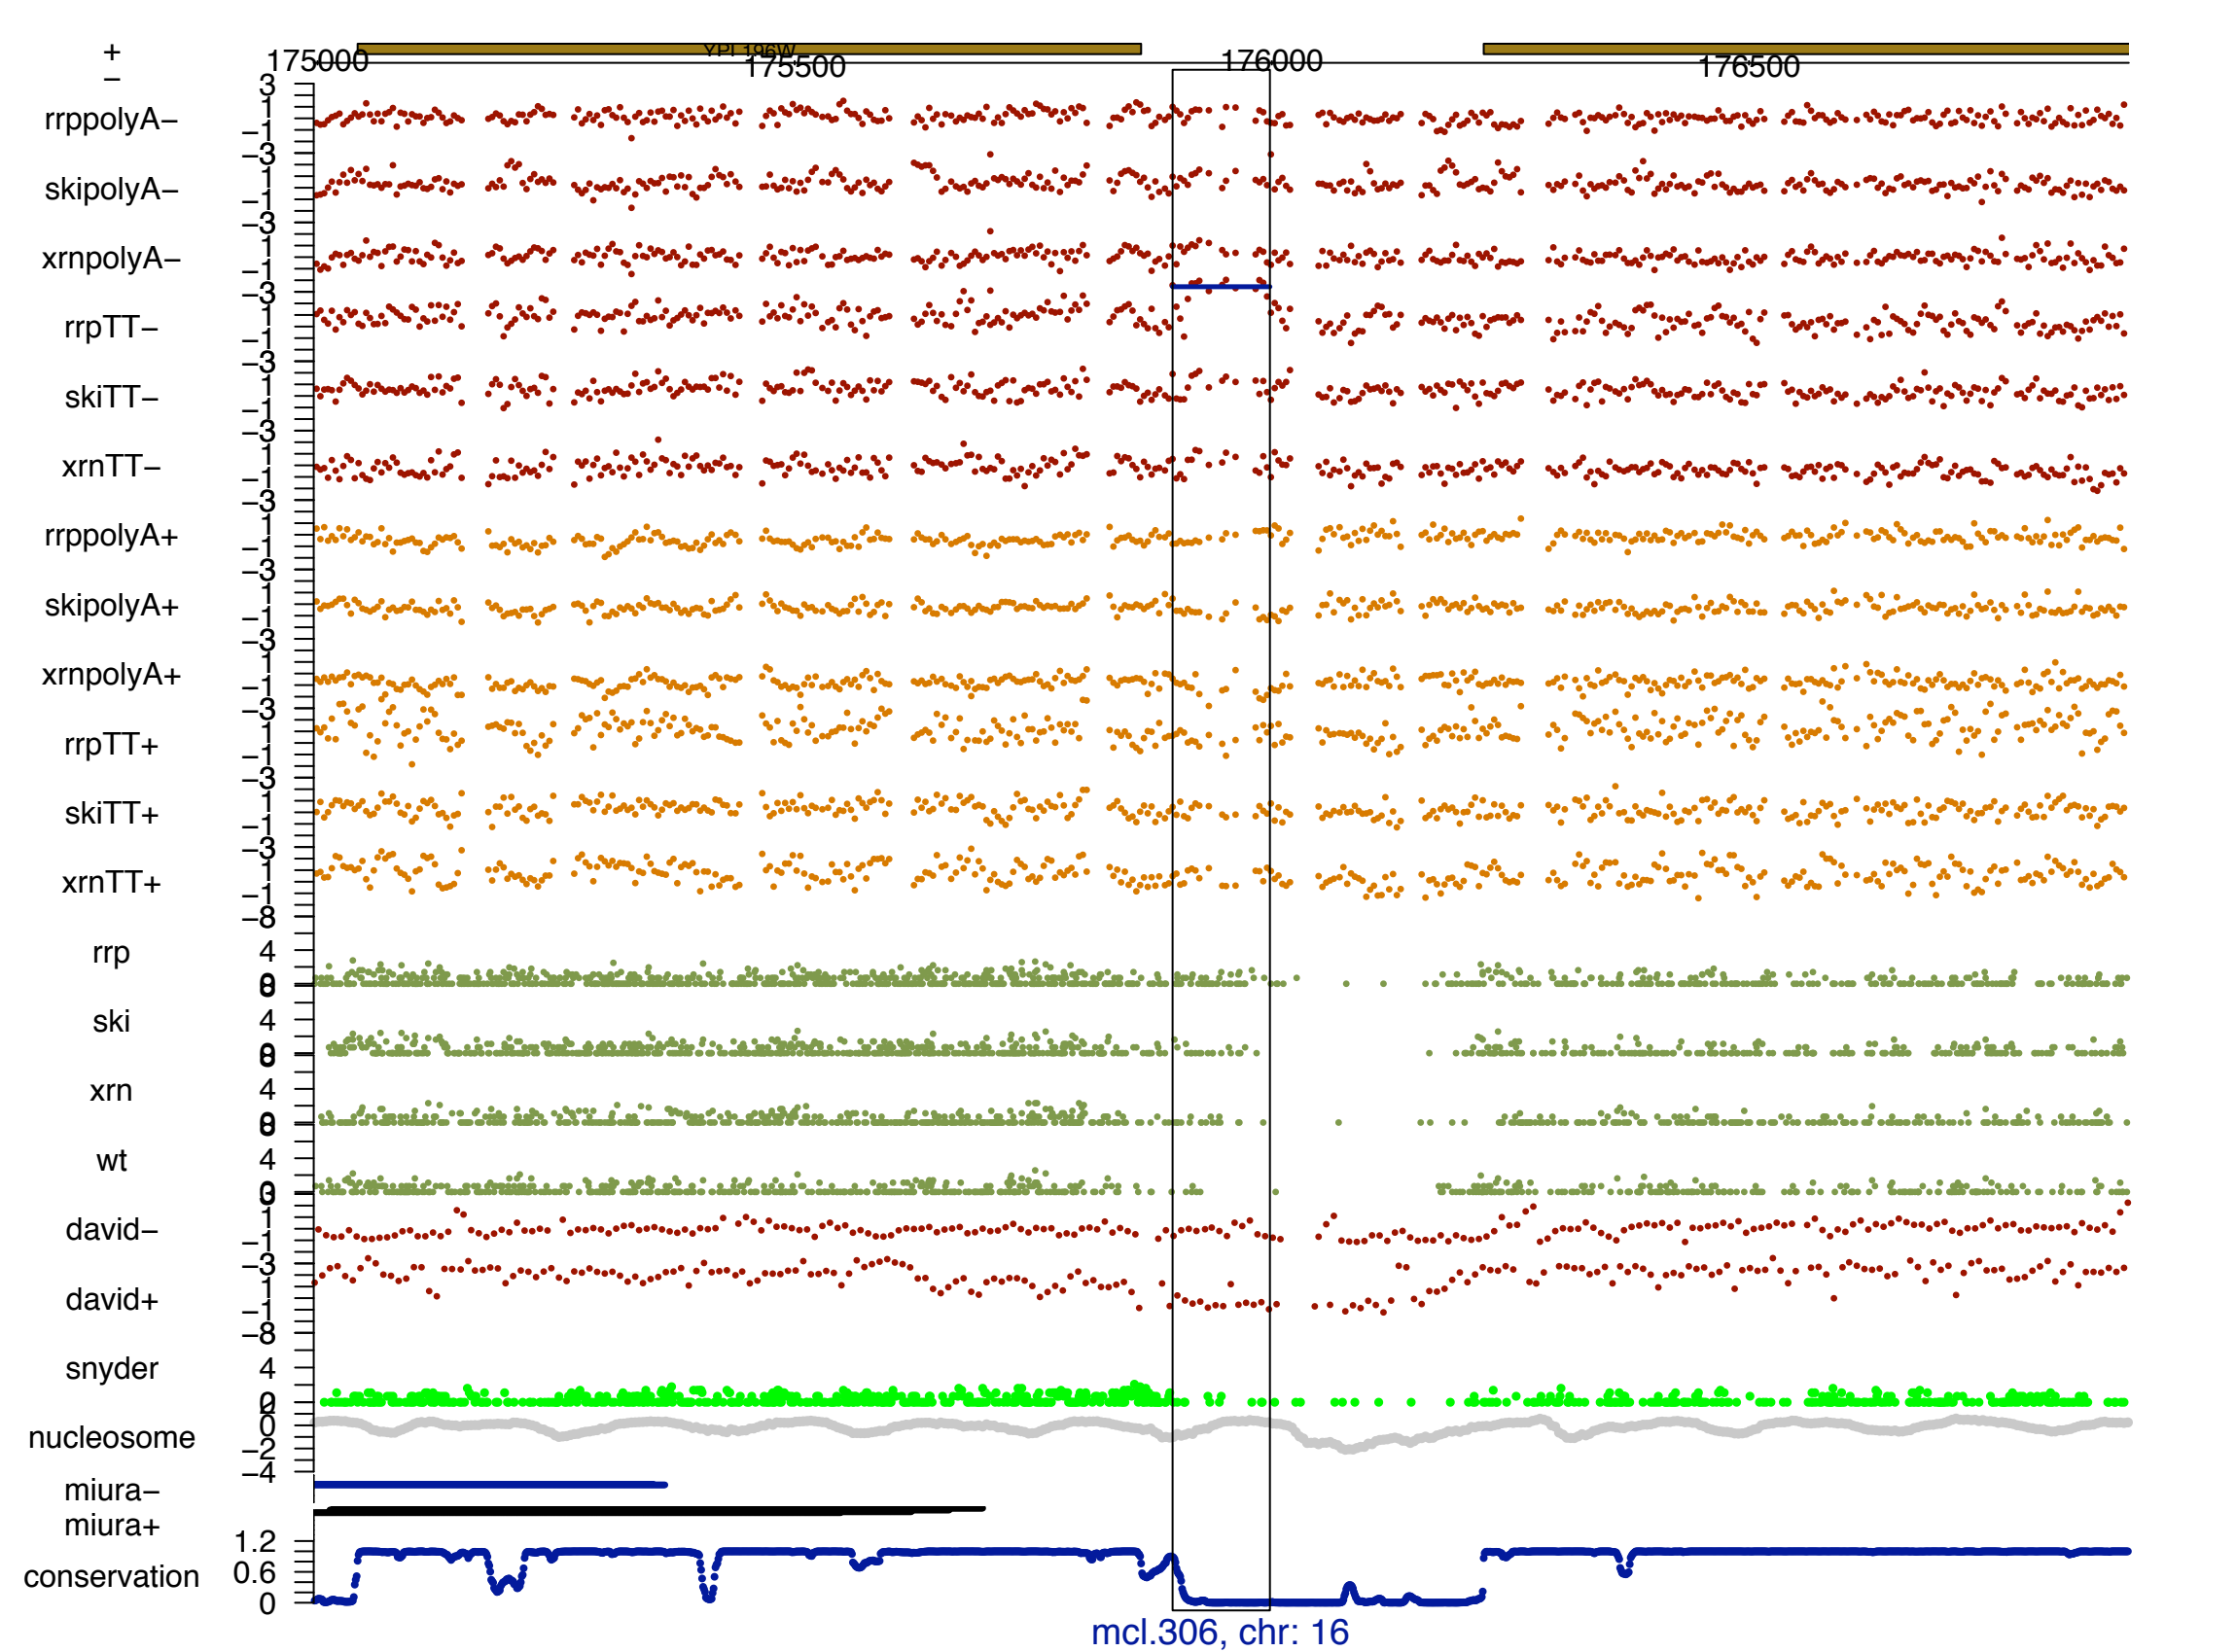

mcl.306, chr: 16





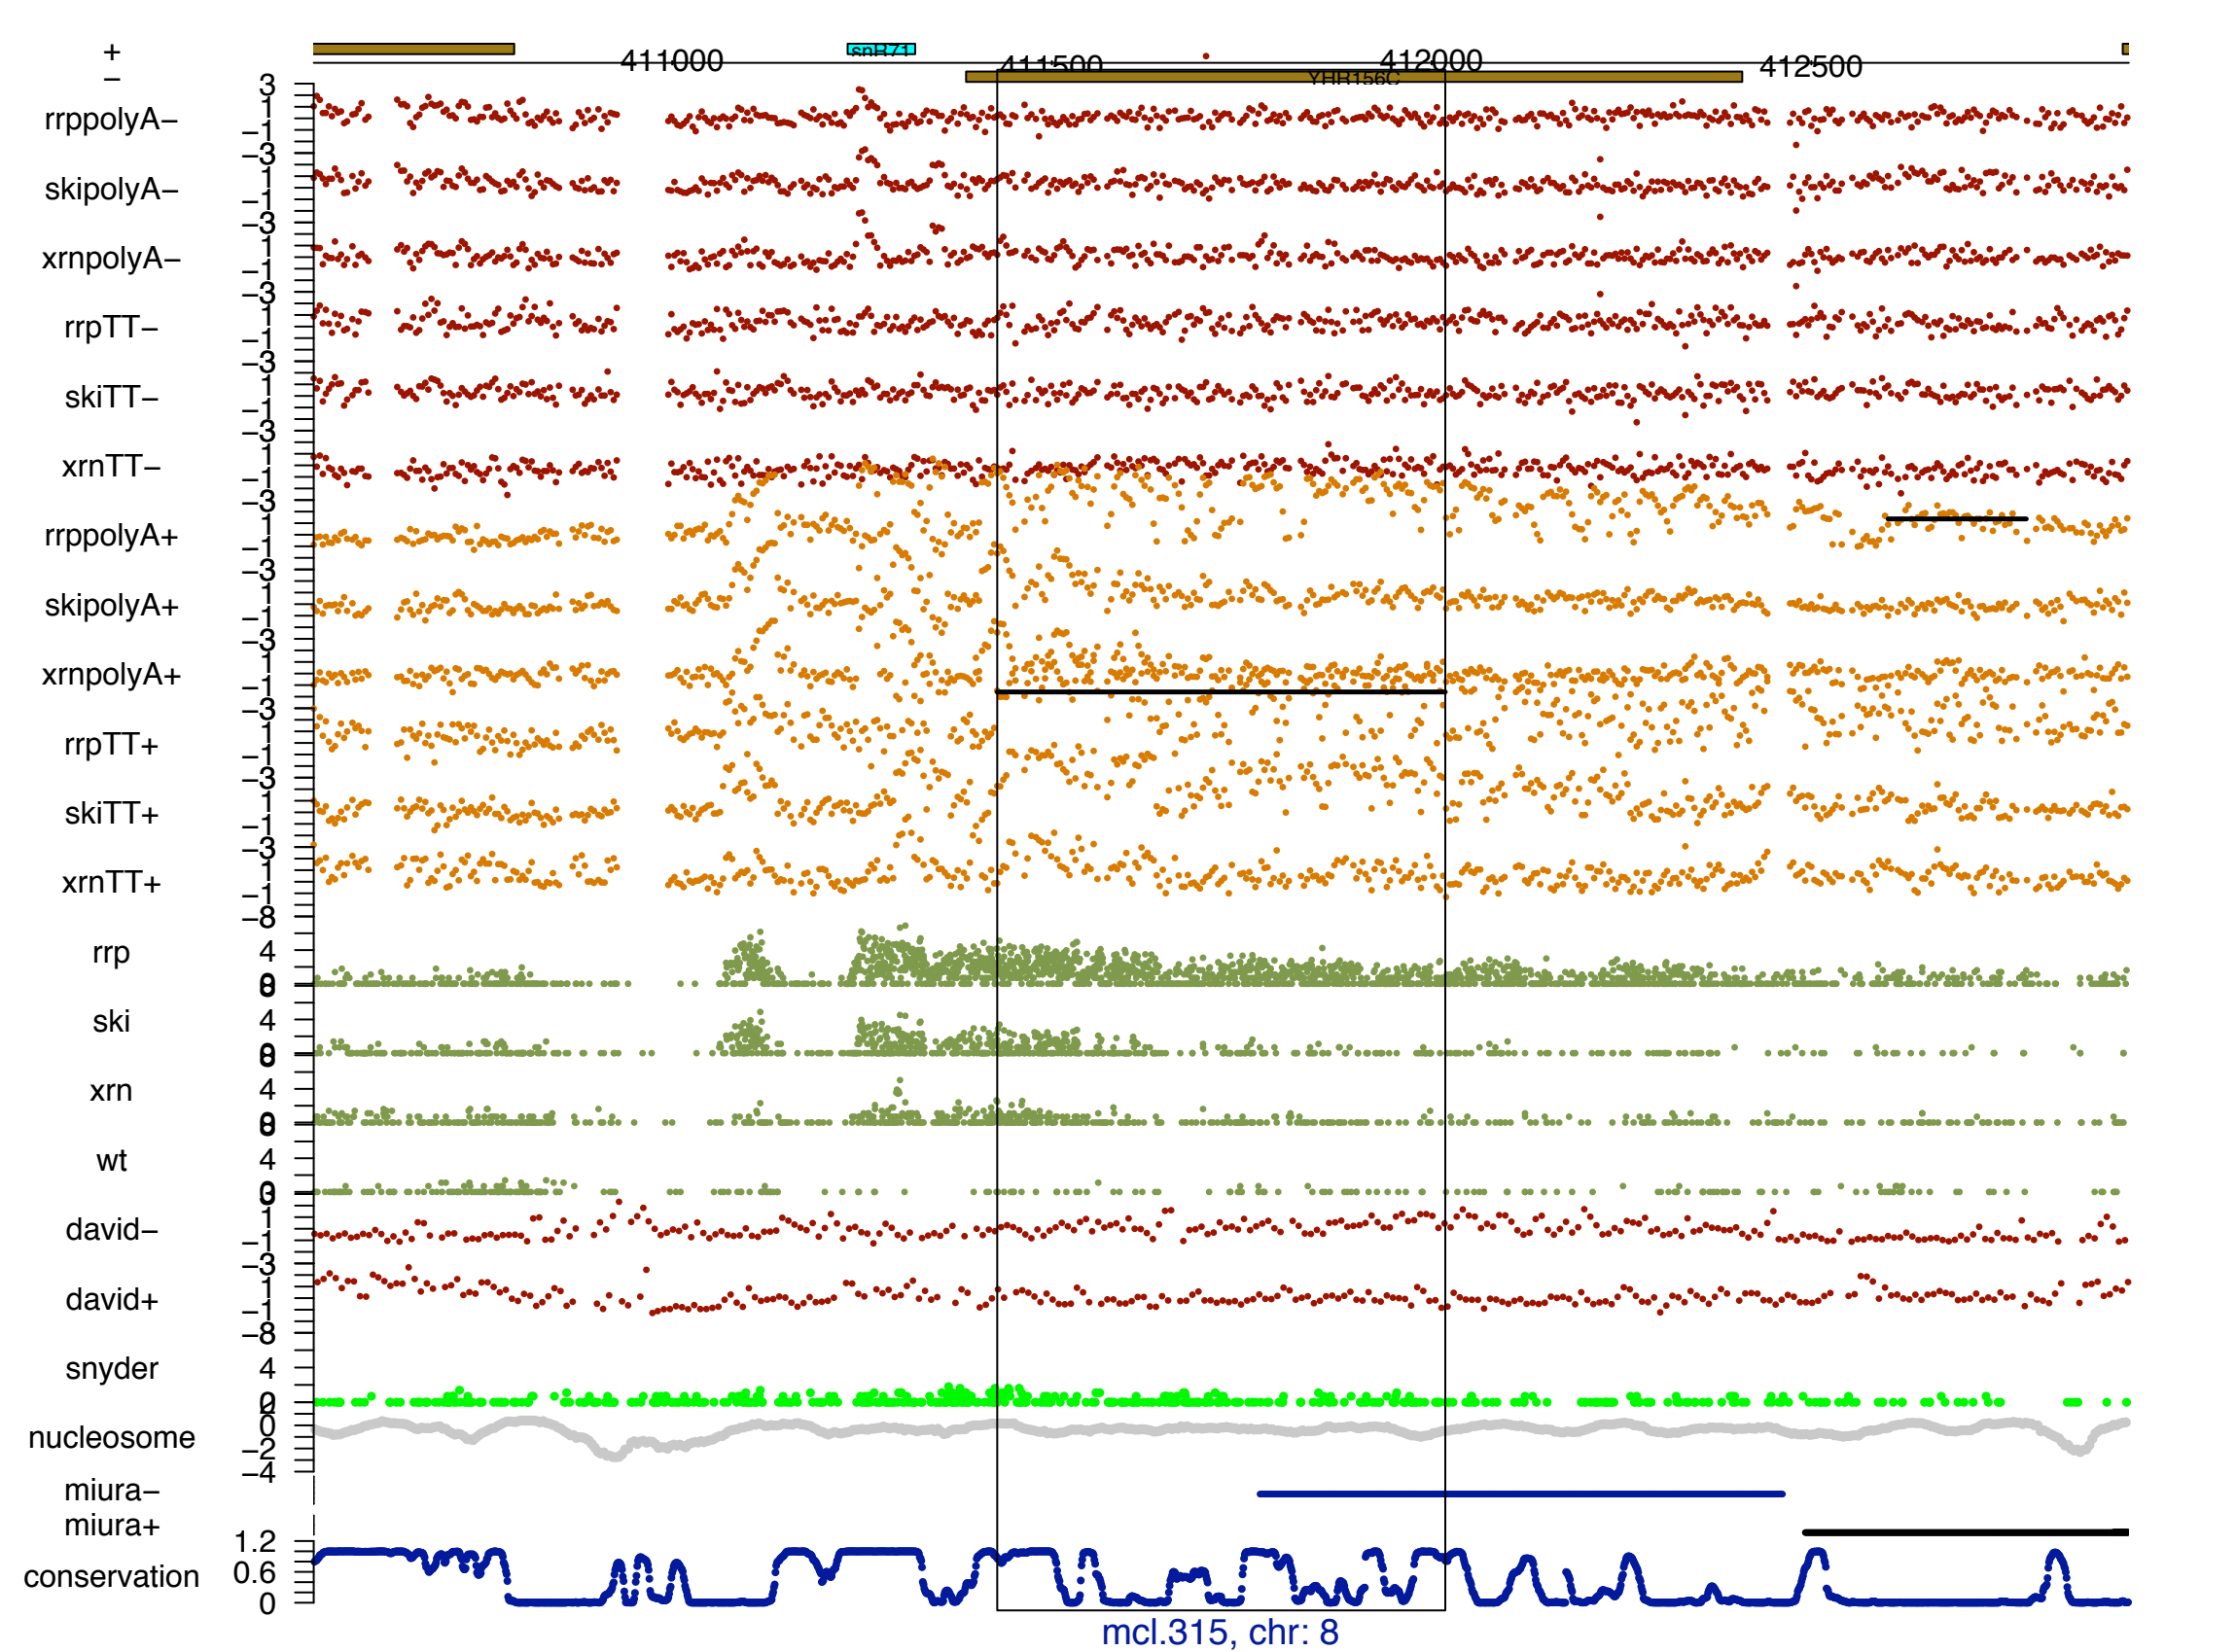

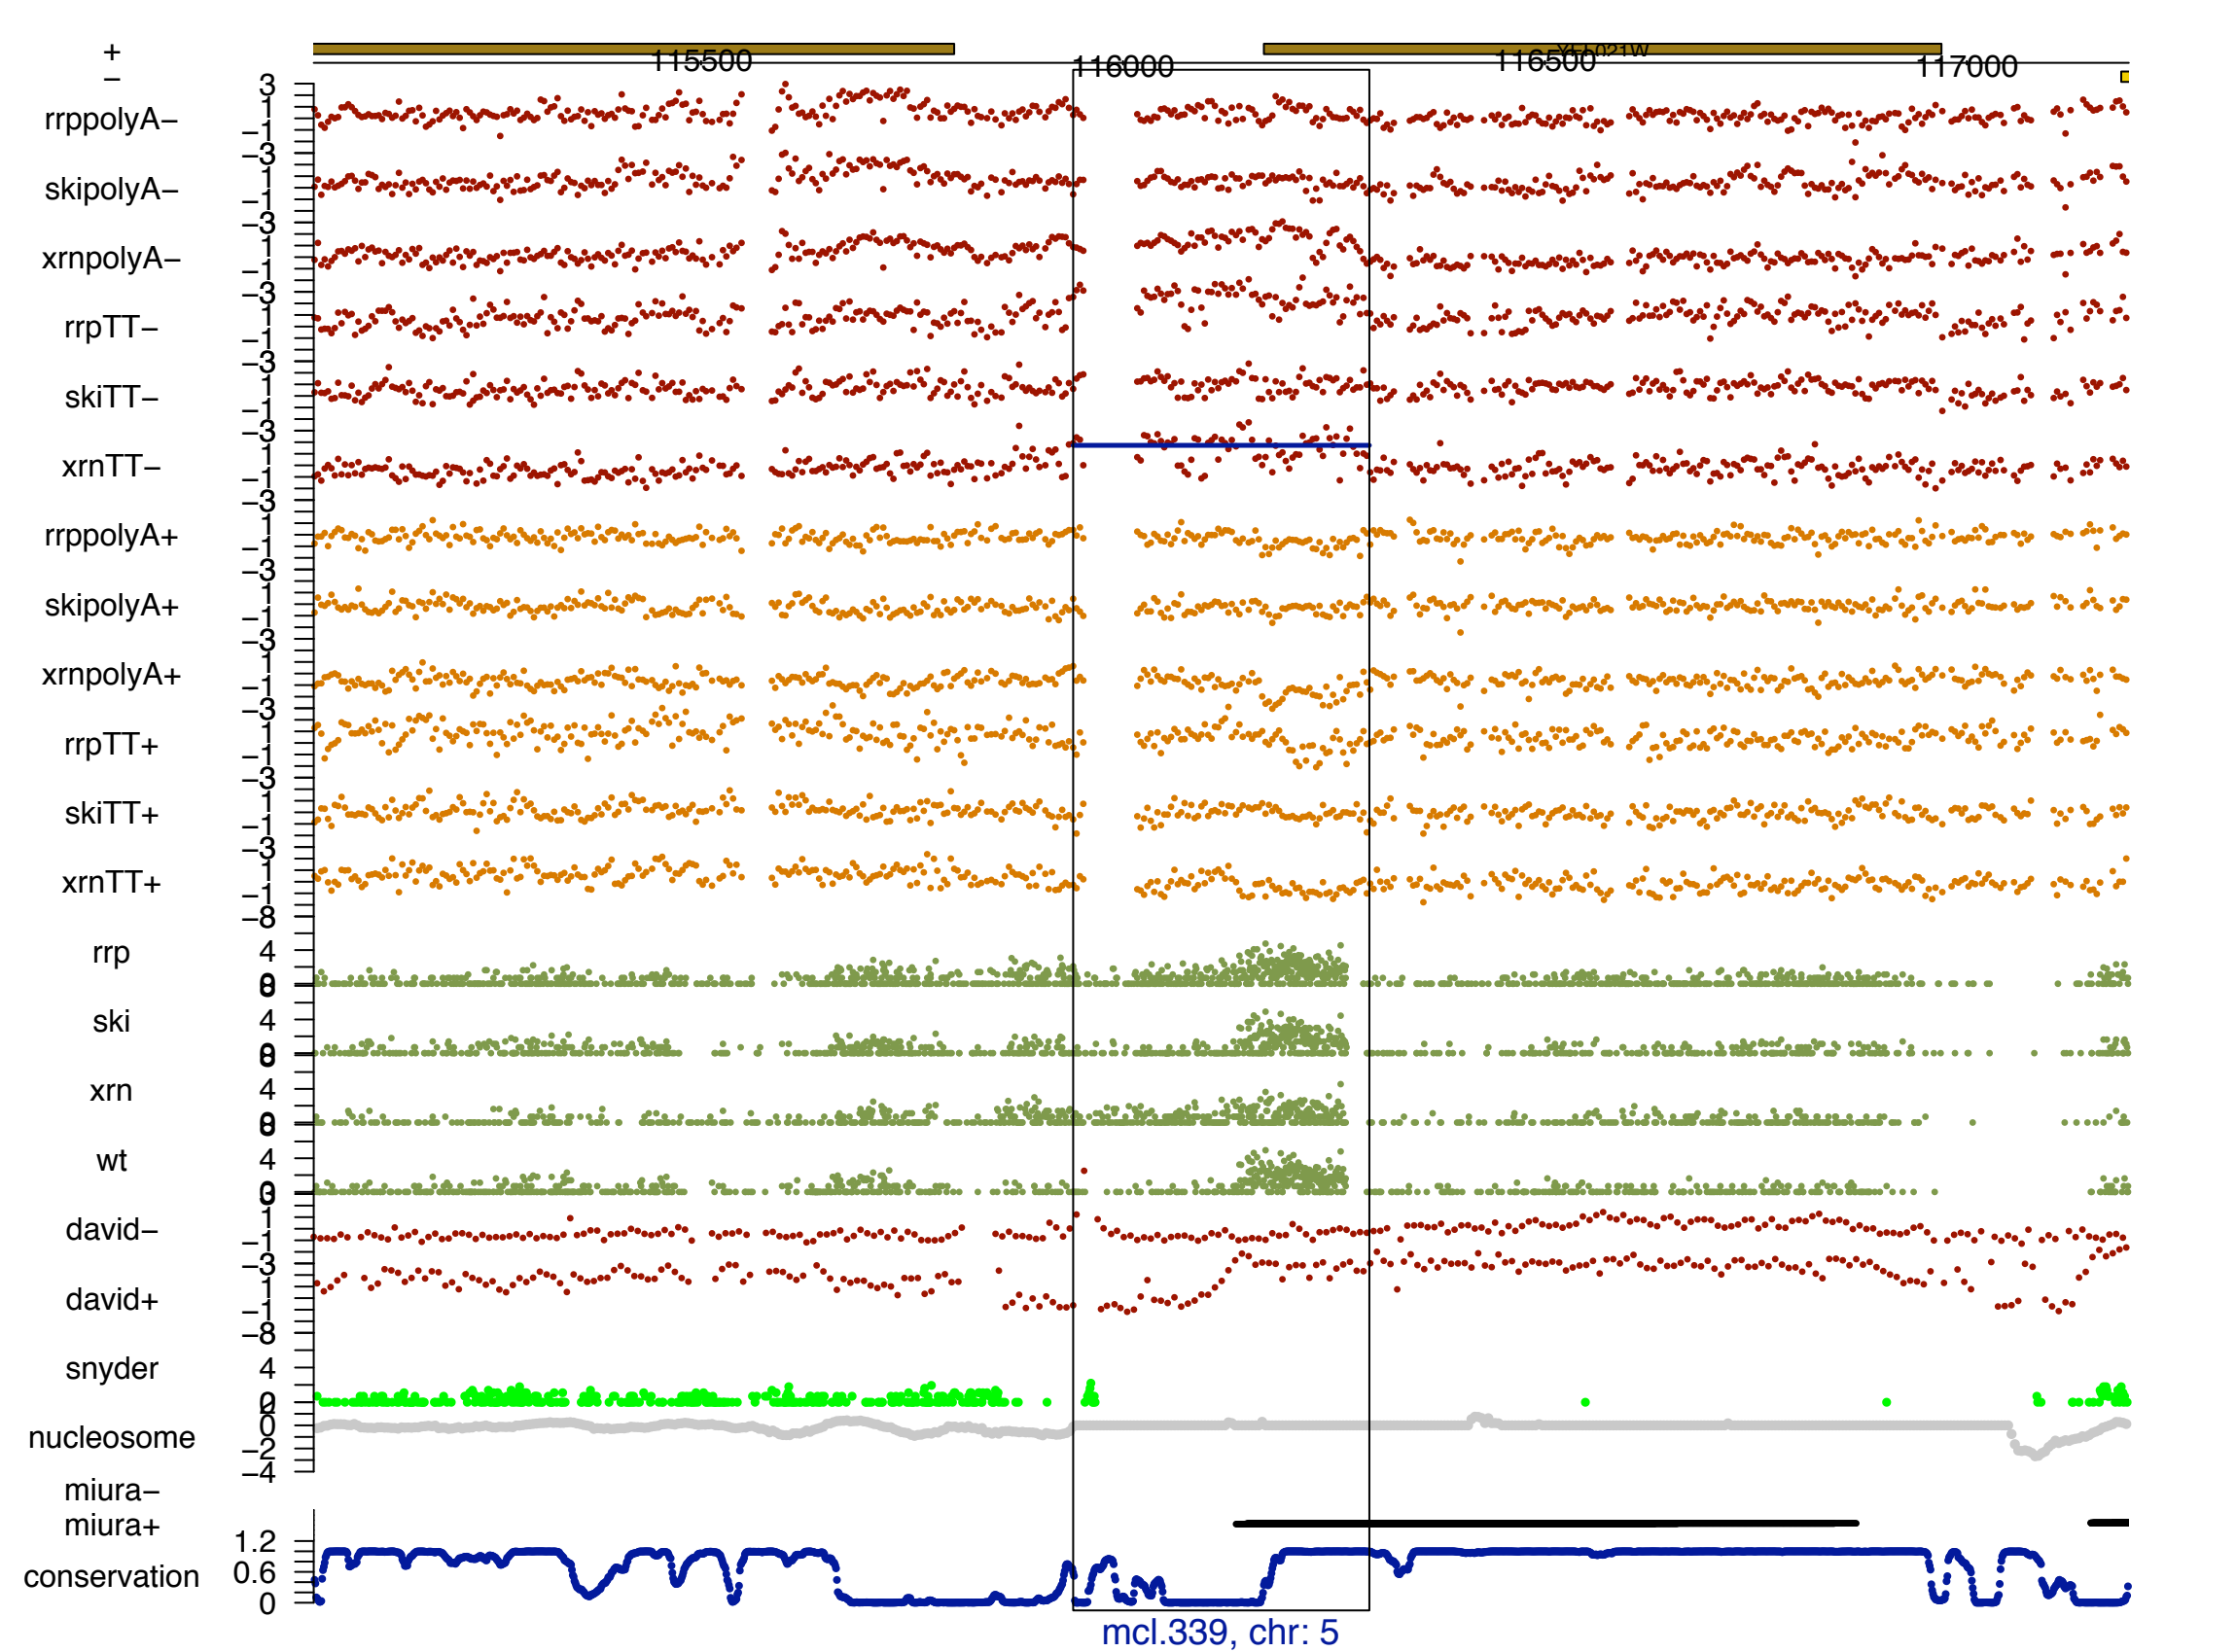

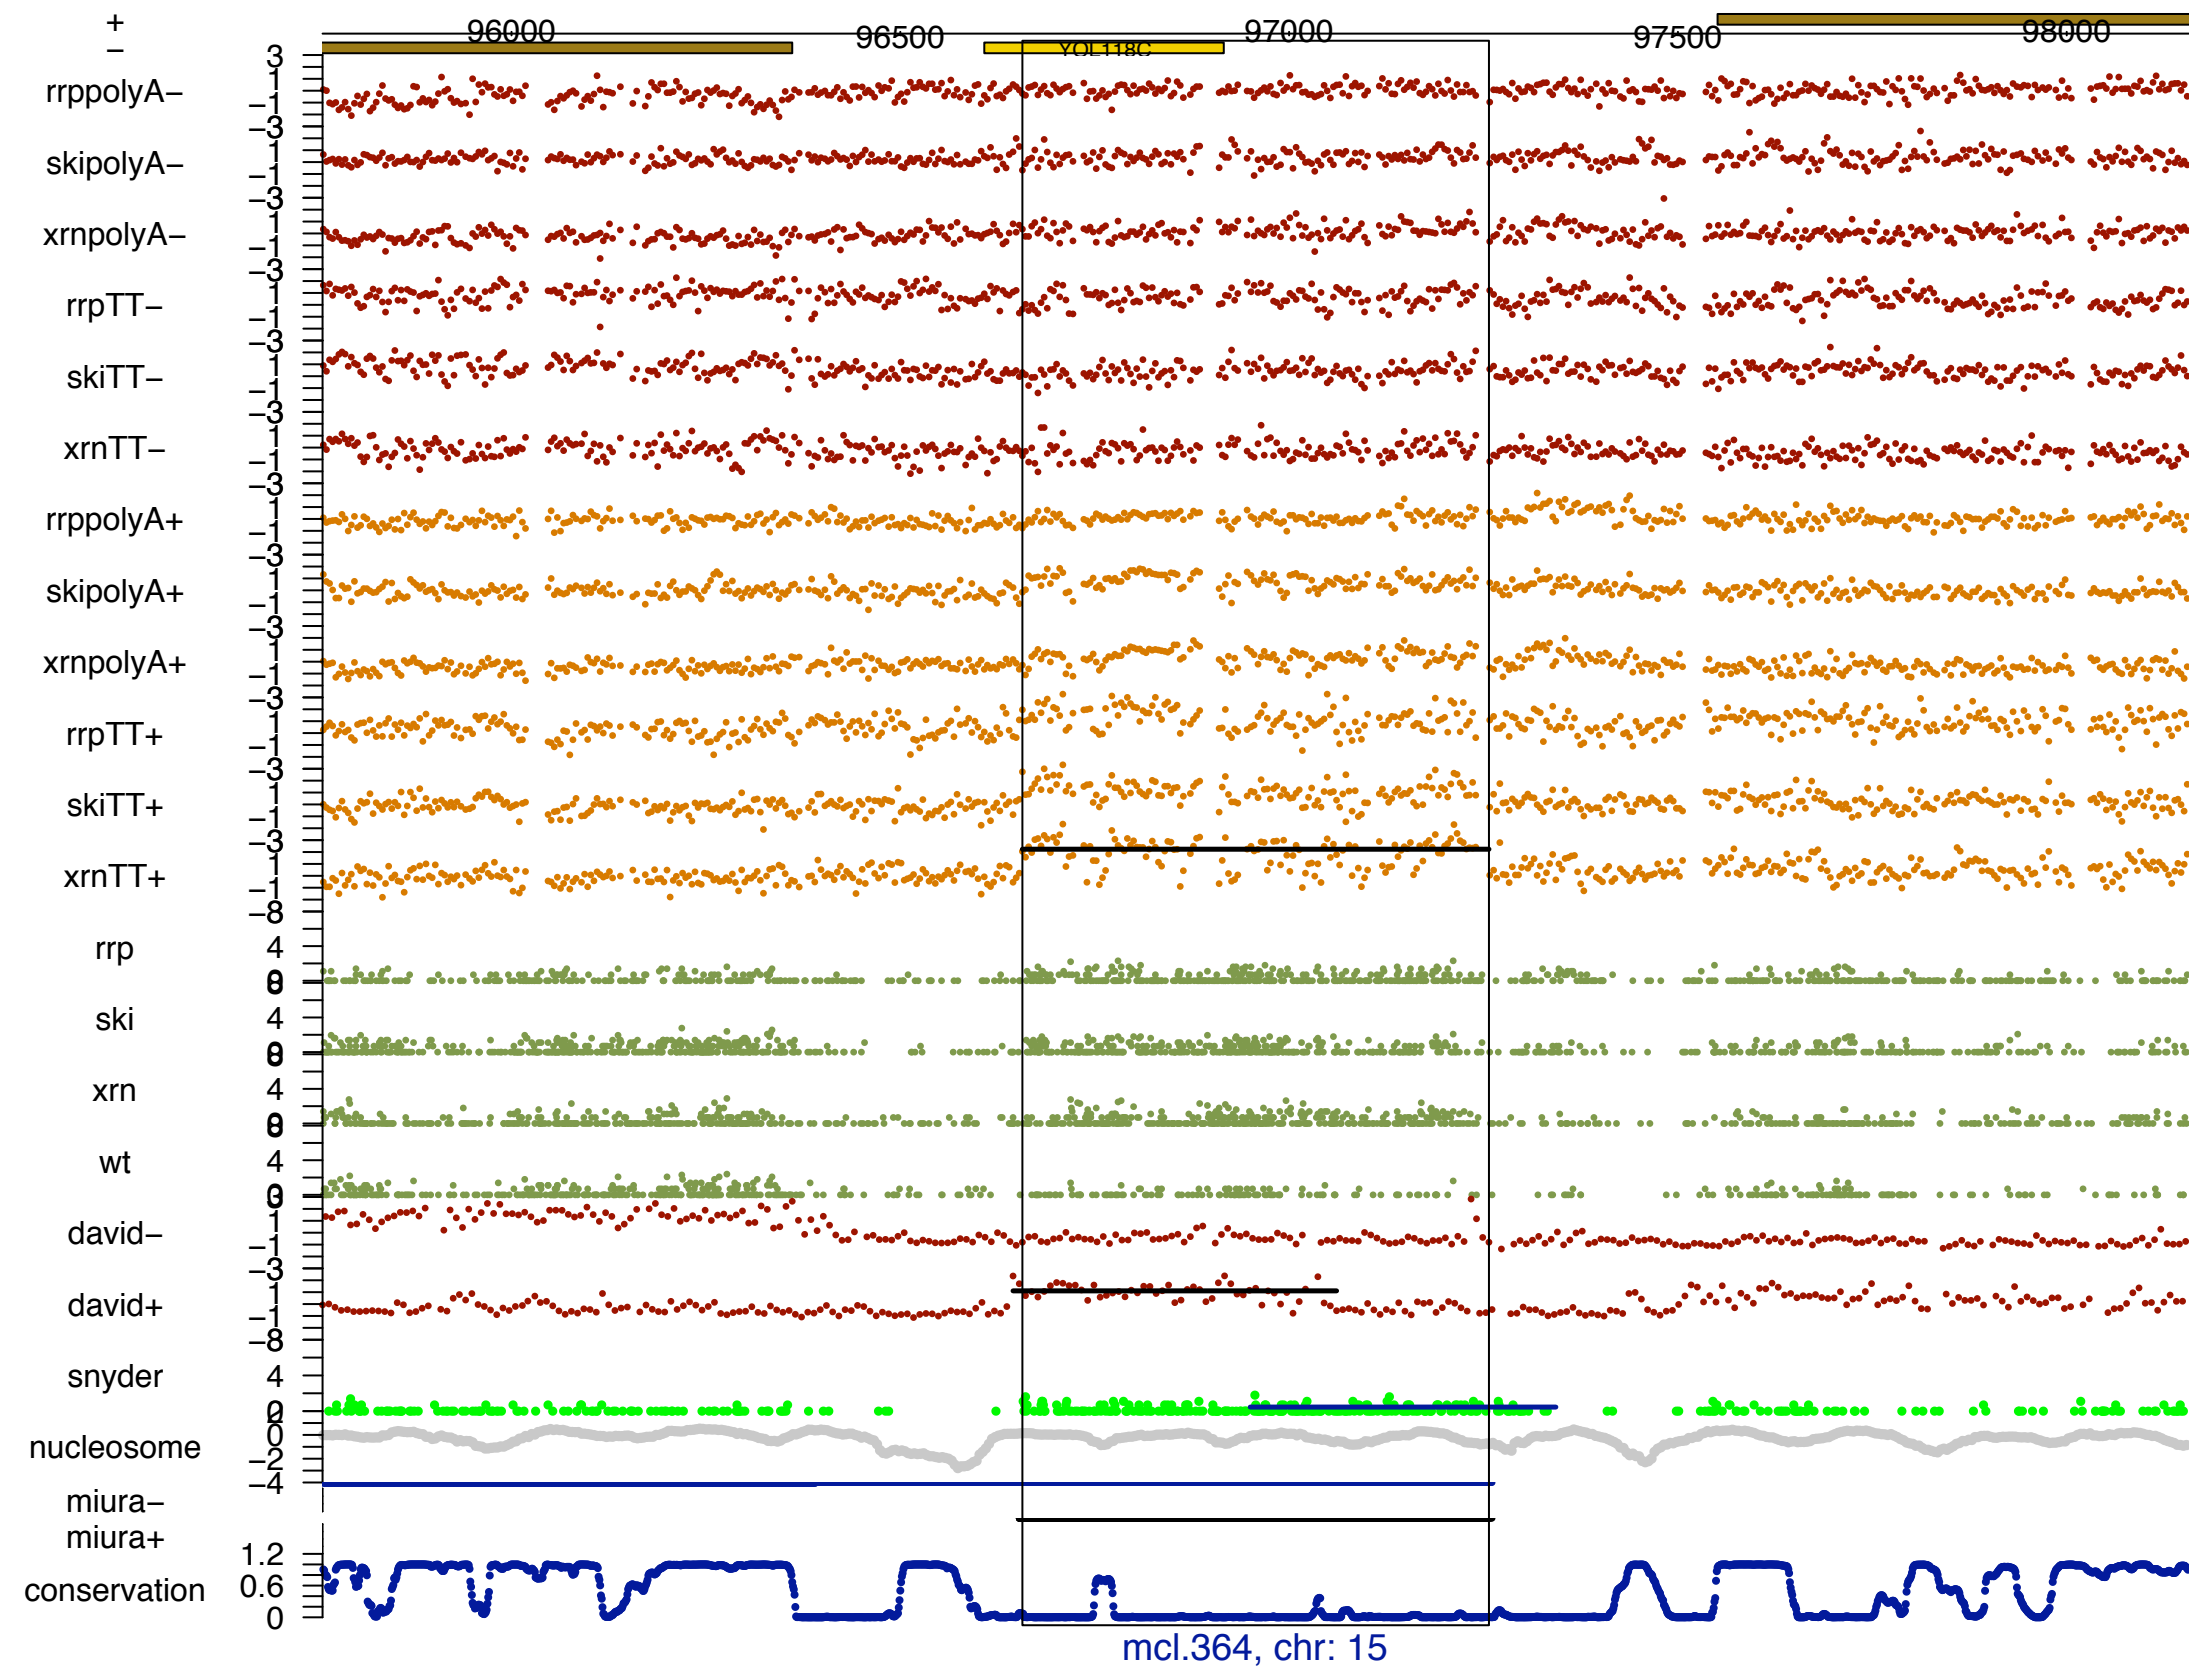

Supplement: pgen.1000299.s005.pdf [file pgen.1000299.s005.pdf]
