# Supplementary material for: Novel Low Abundance and Transient RNAs in Yeast Revealed by Tiling Microarrays and Ultra High–Throughput Sequencing Are Not Conserved Across Closely Related Yeast Species
Source: PubMed Central journal article supplement (PMC2601015; doi:10.1371/journal.pgen.1000299), 2008-12-19

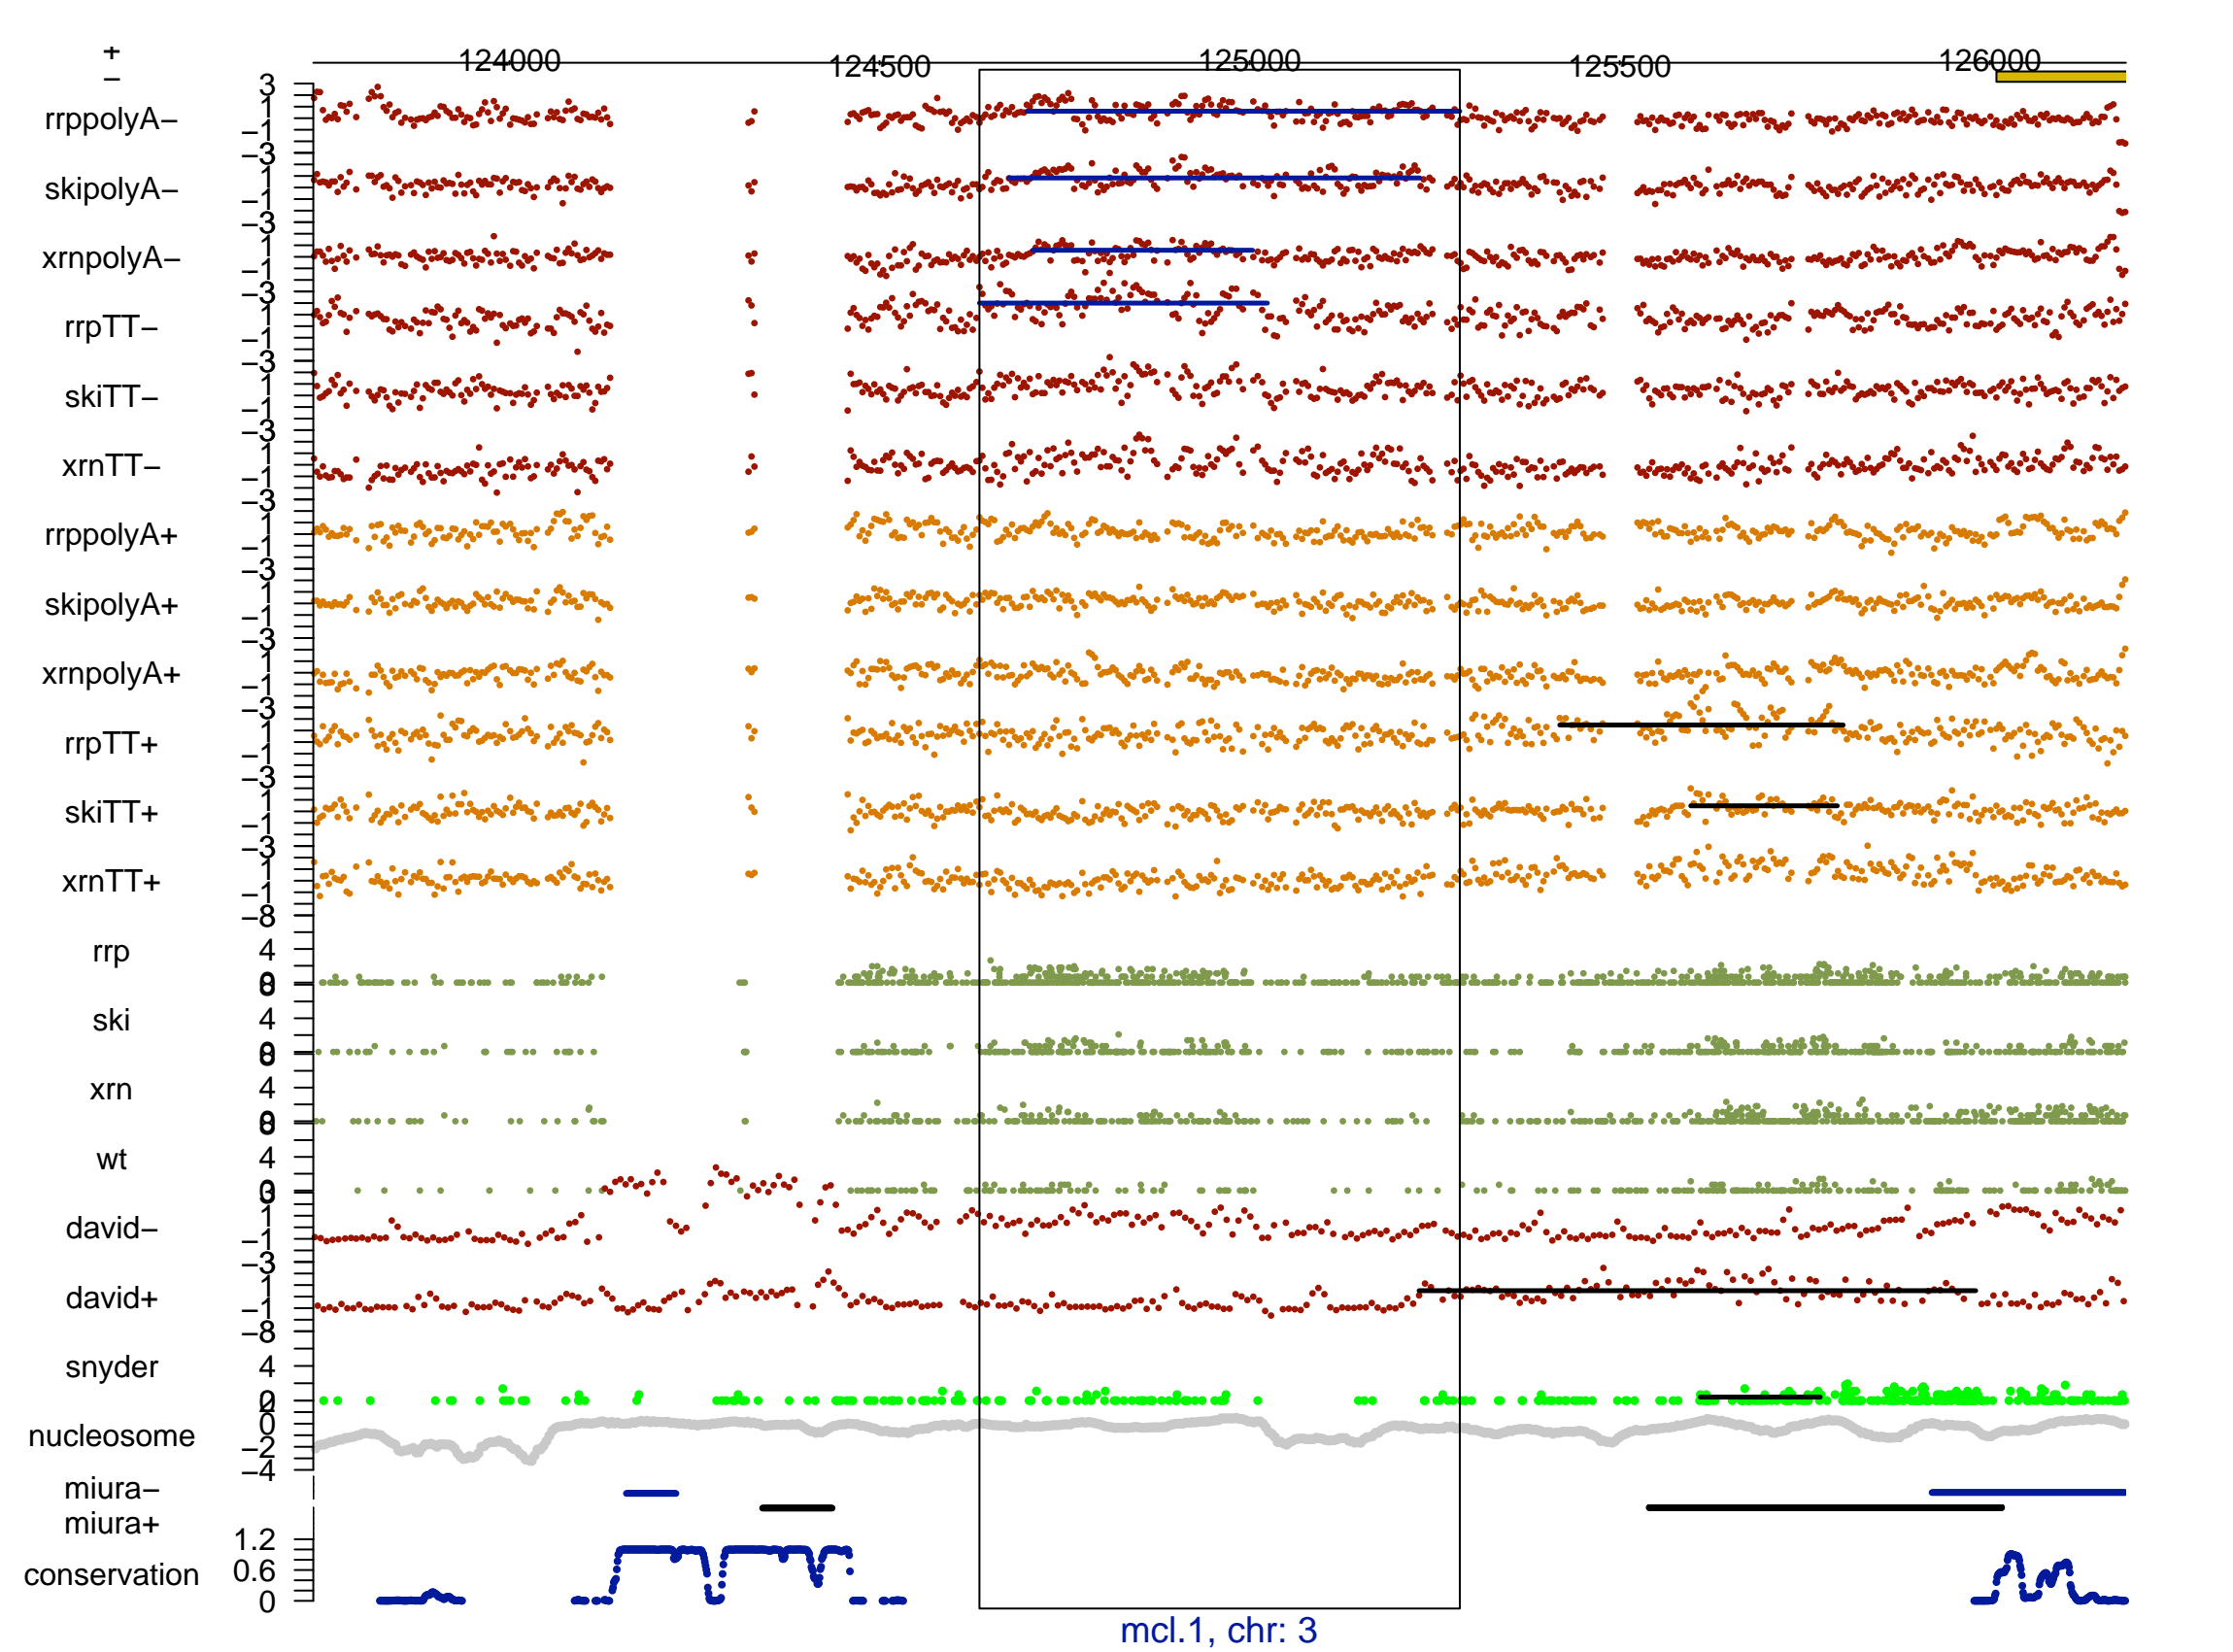

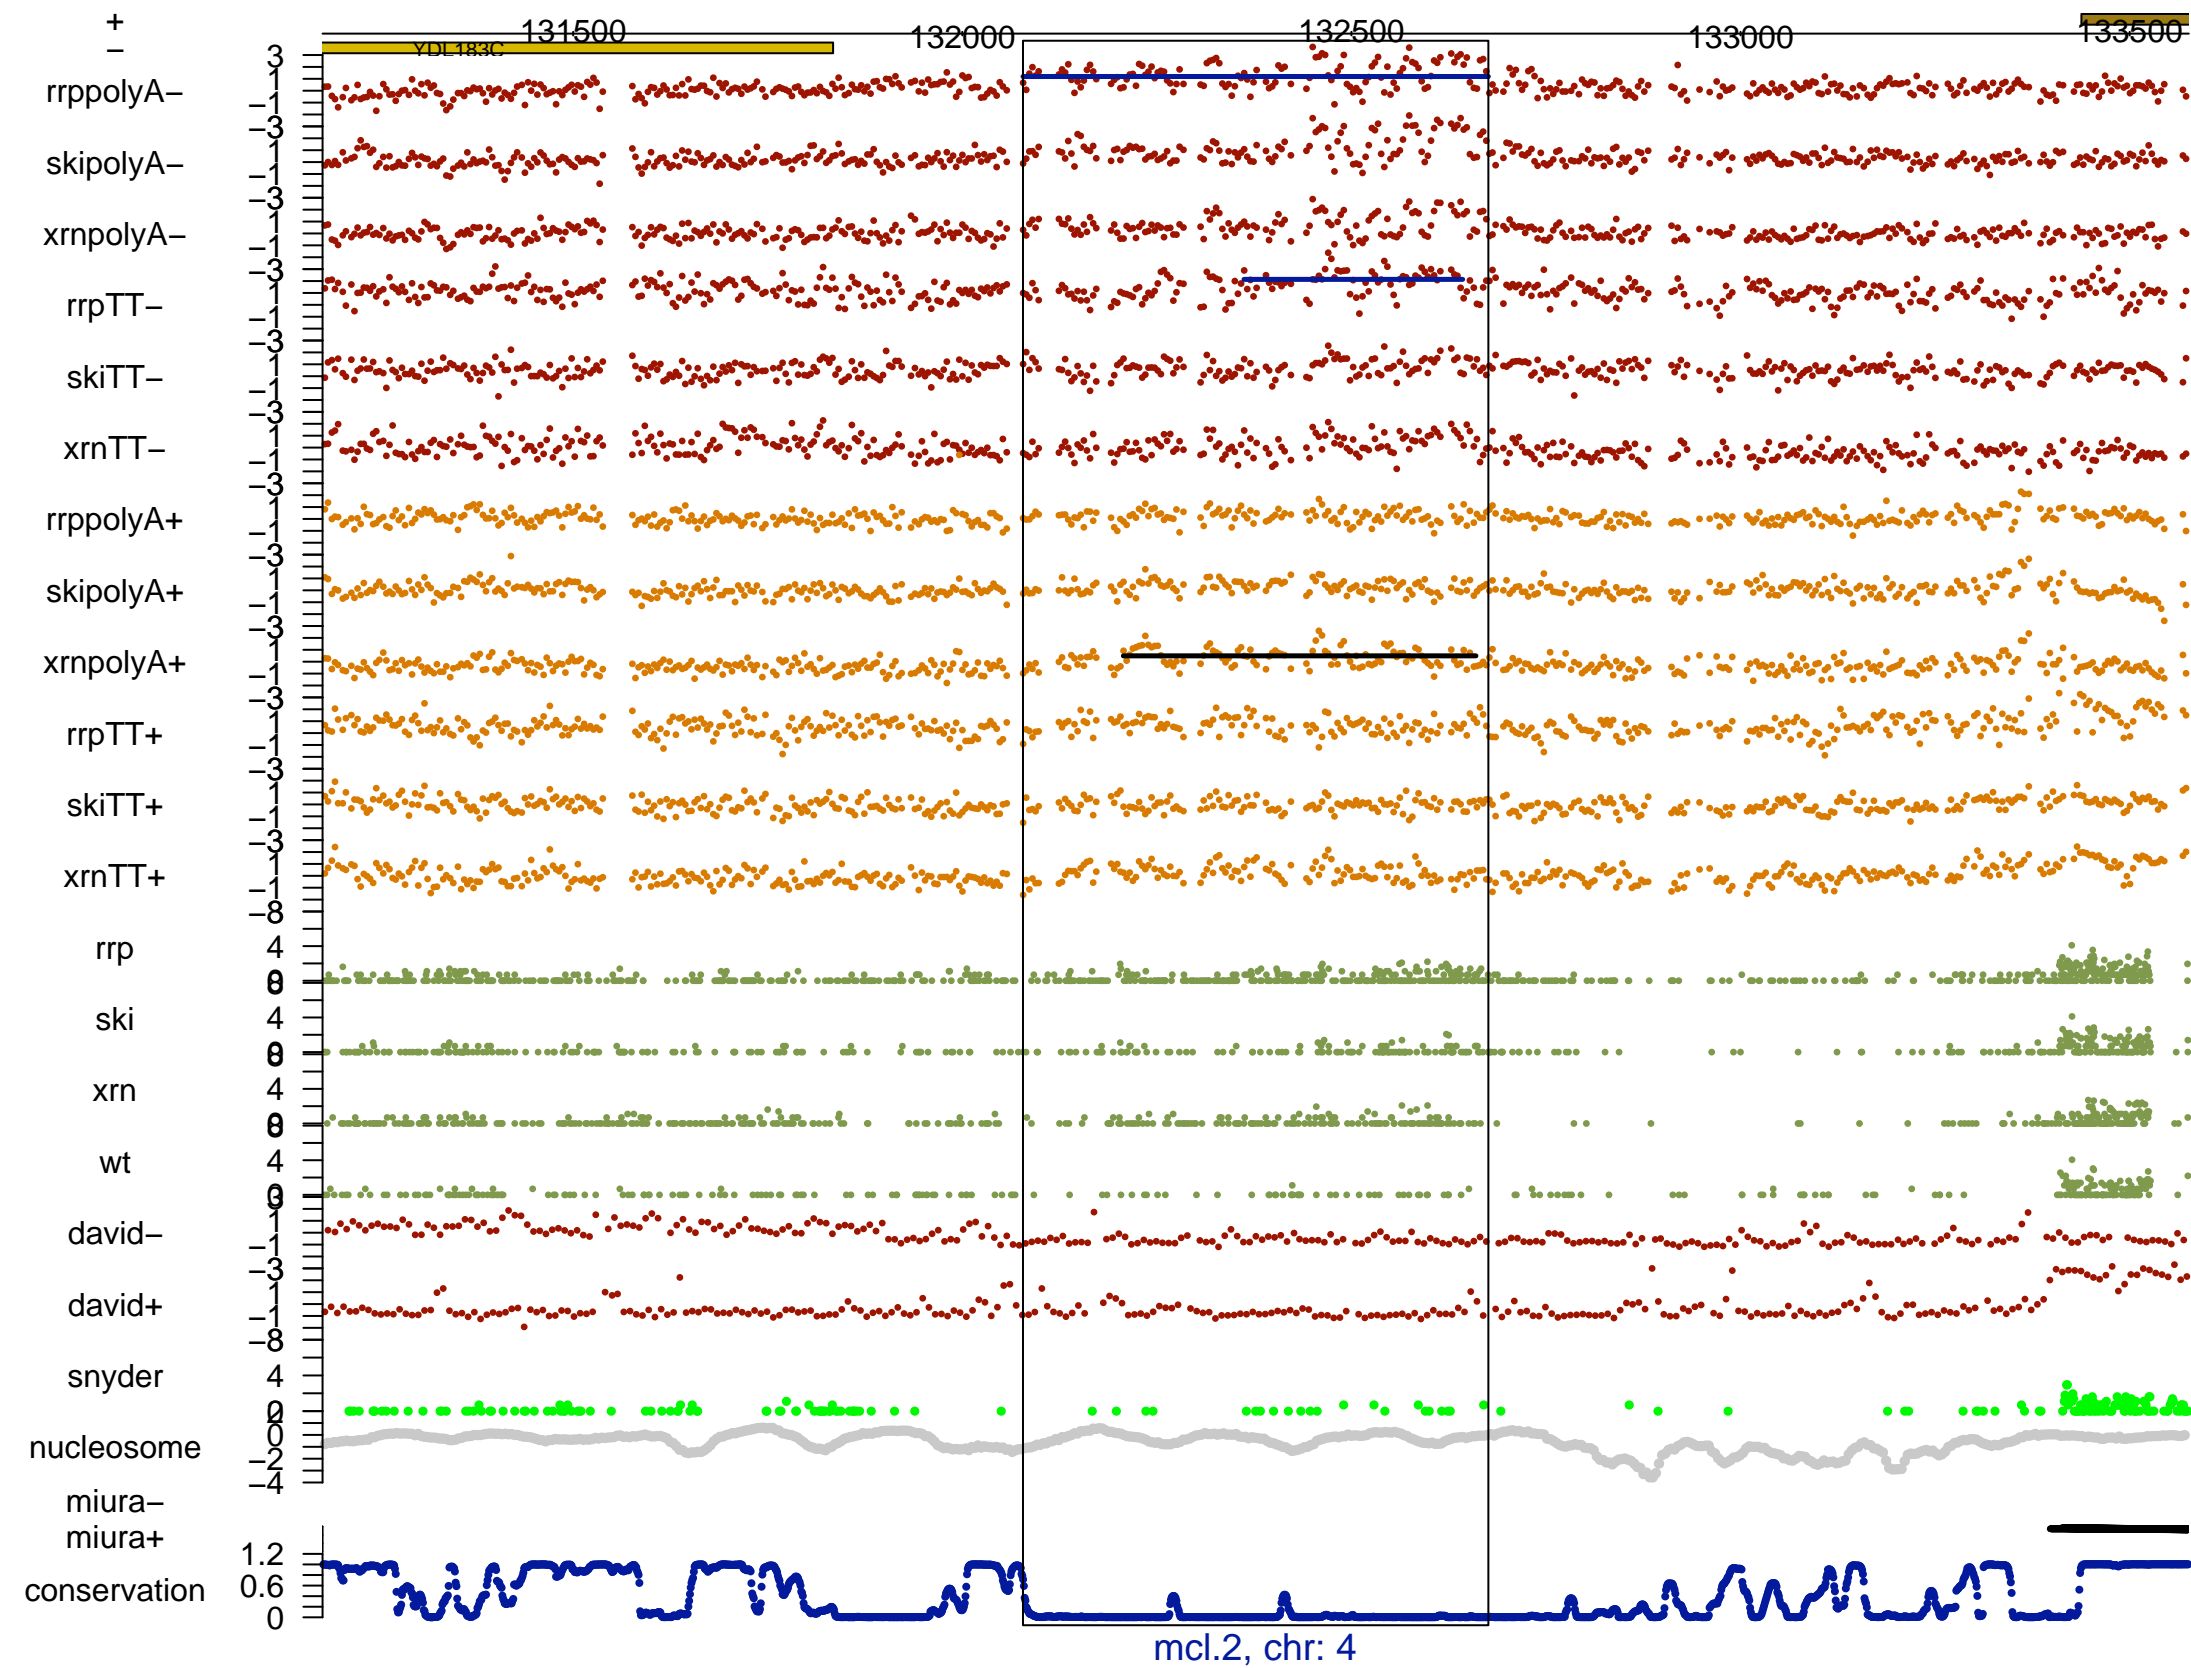







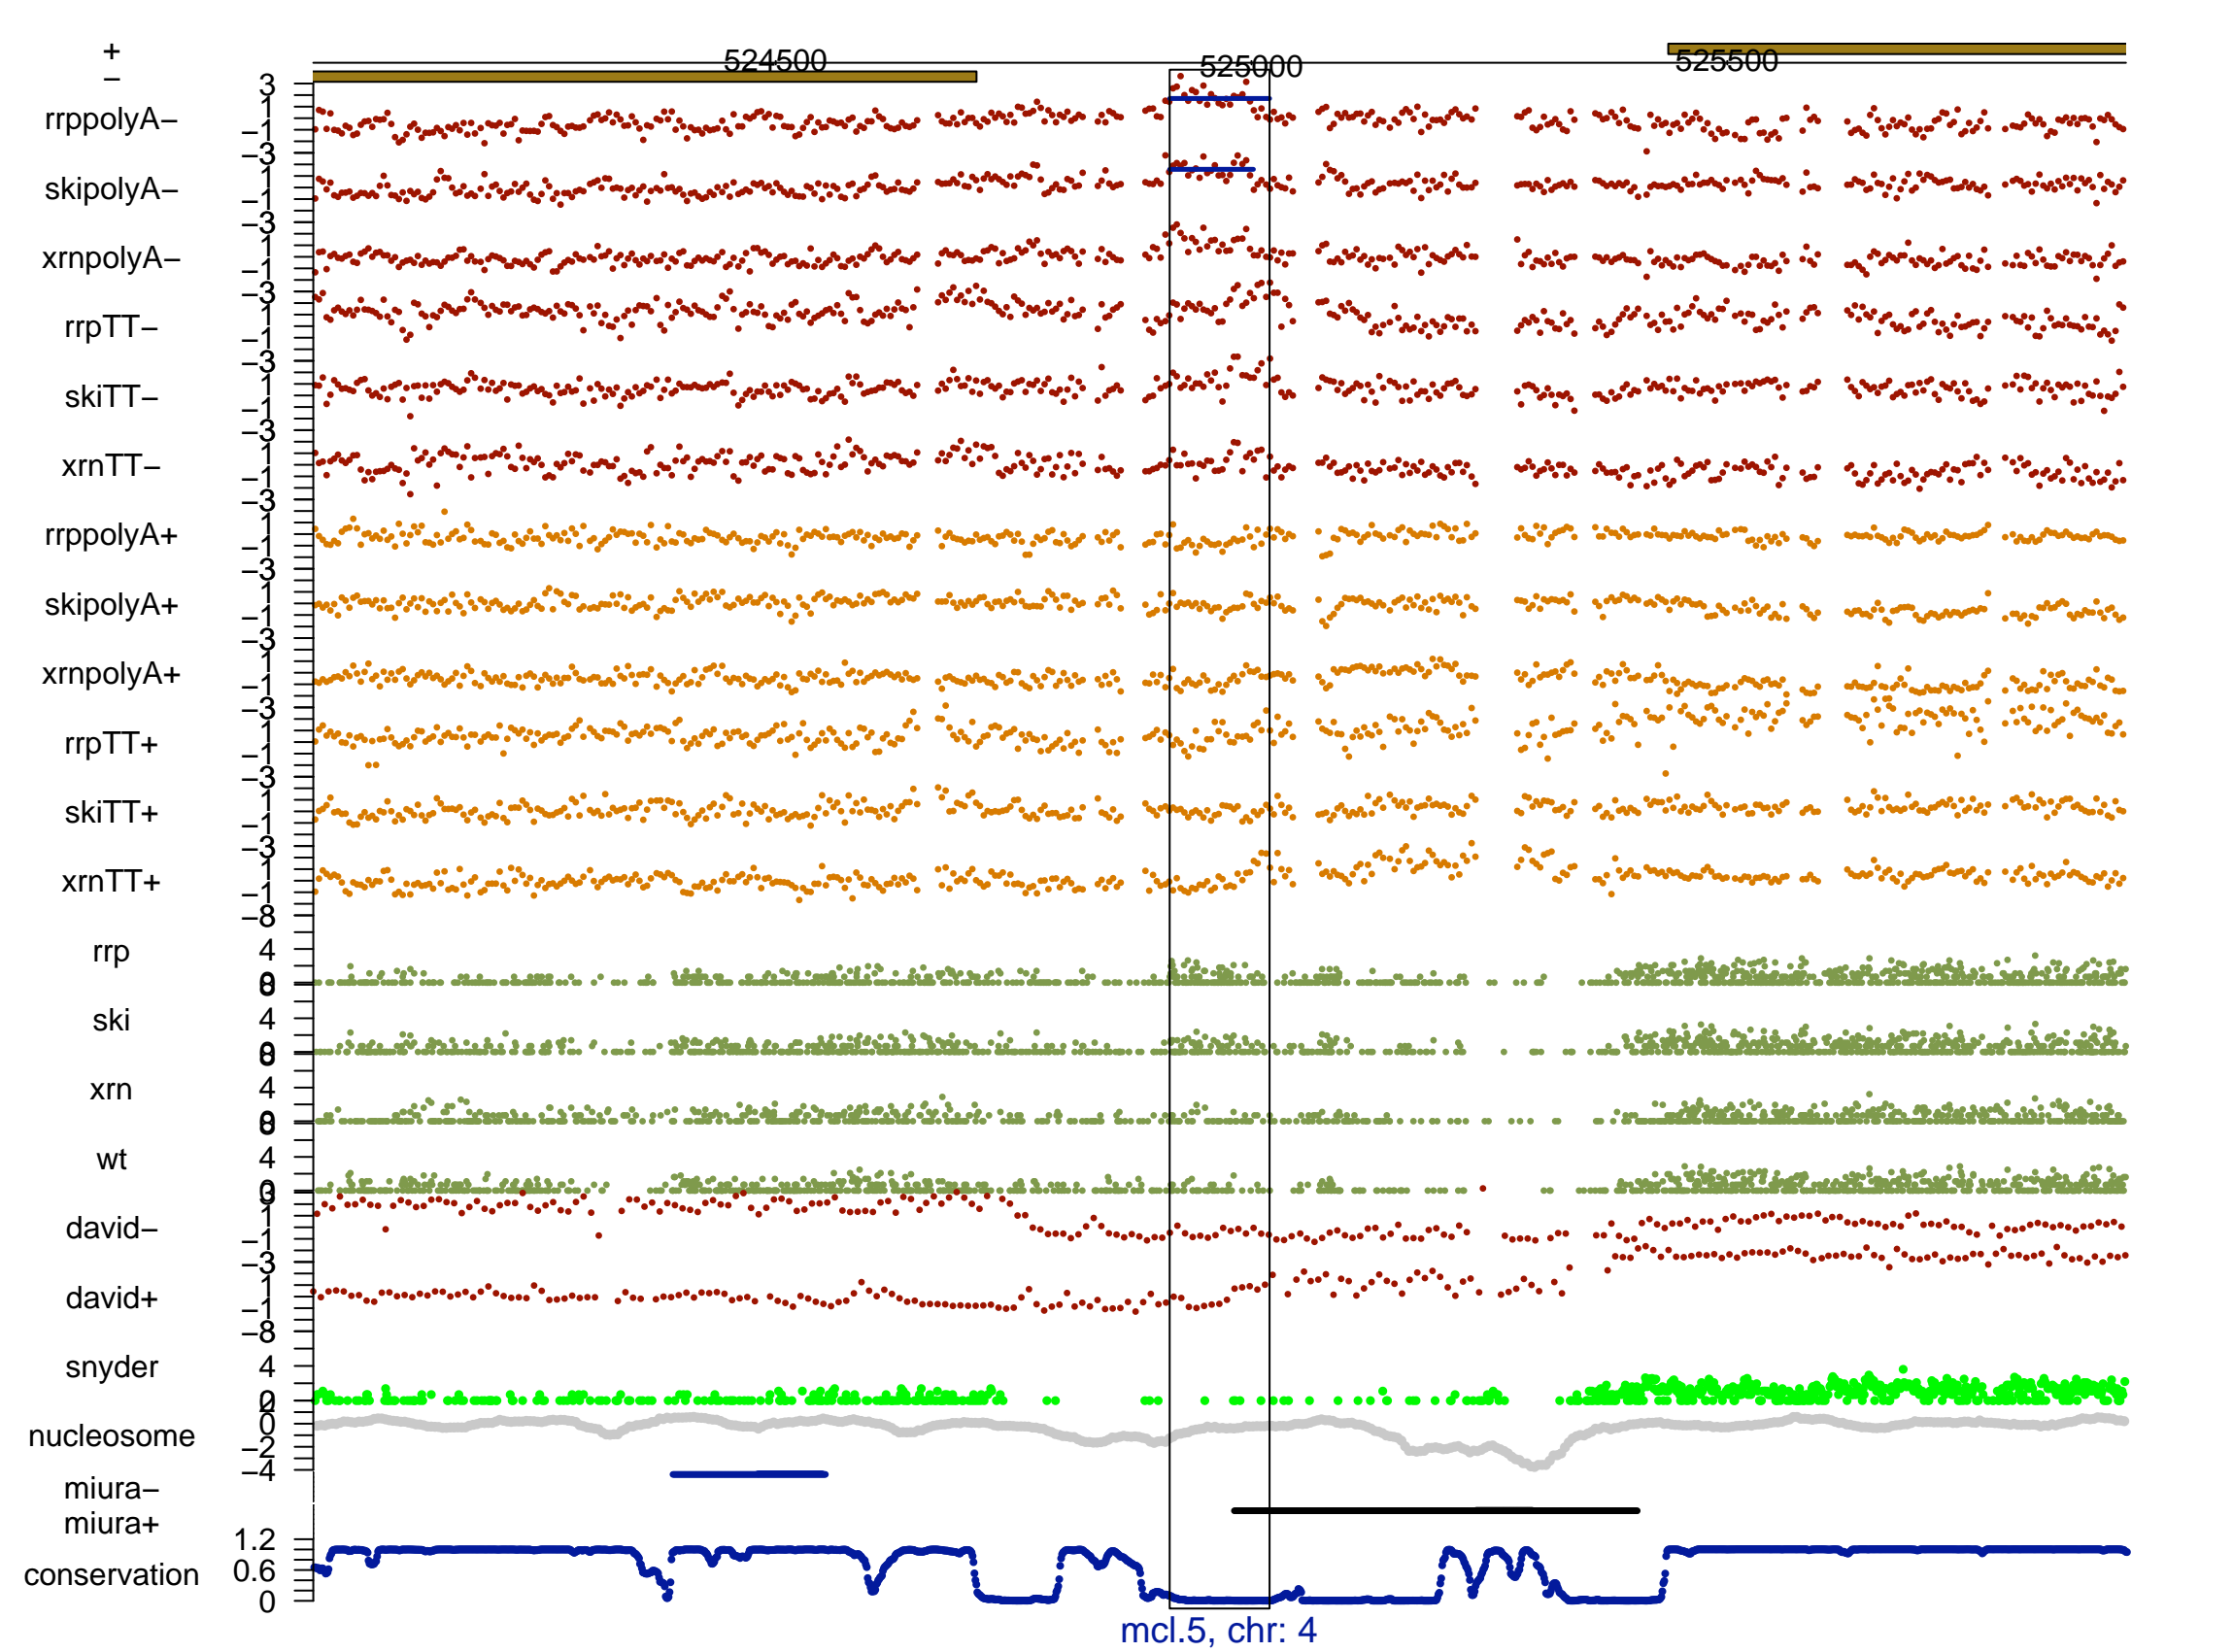

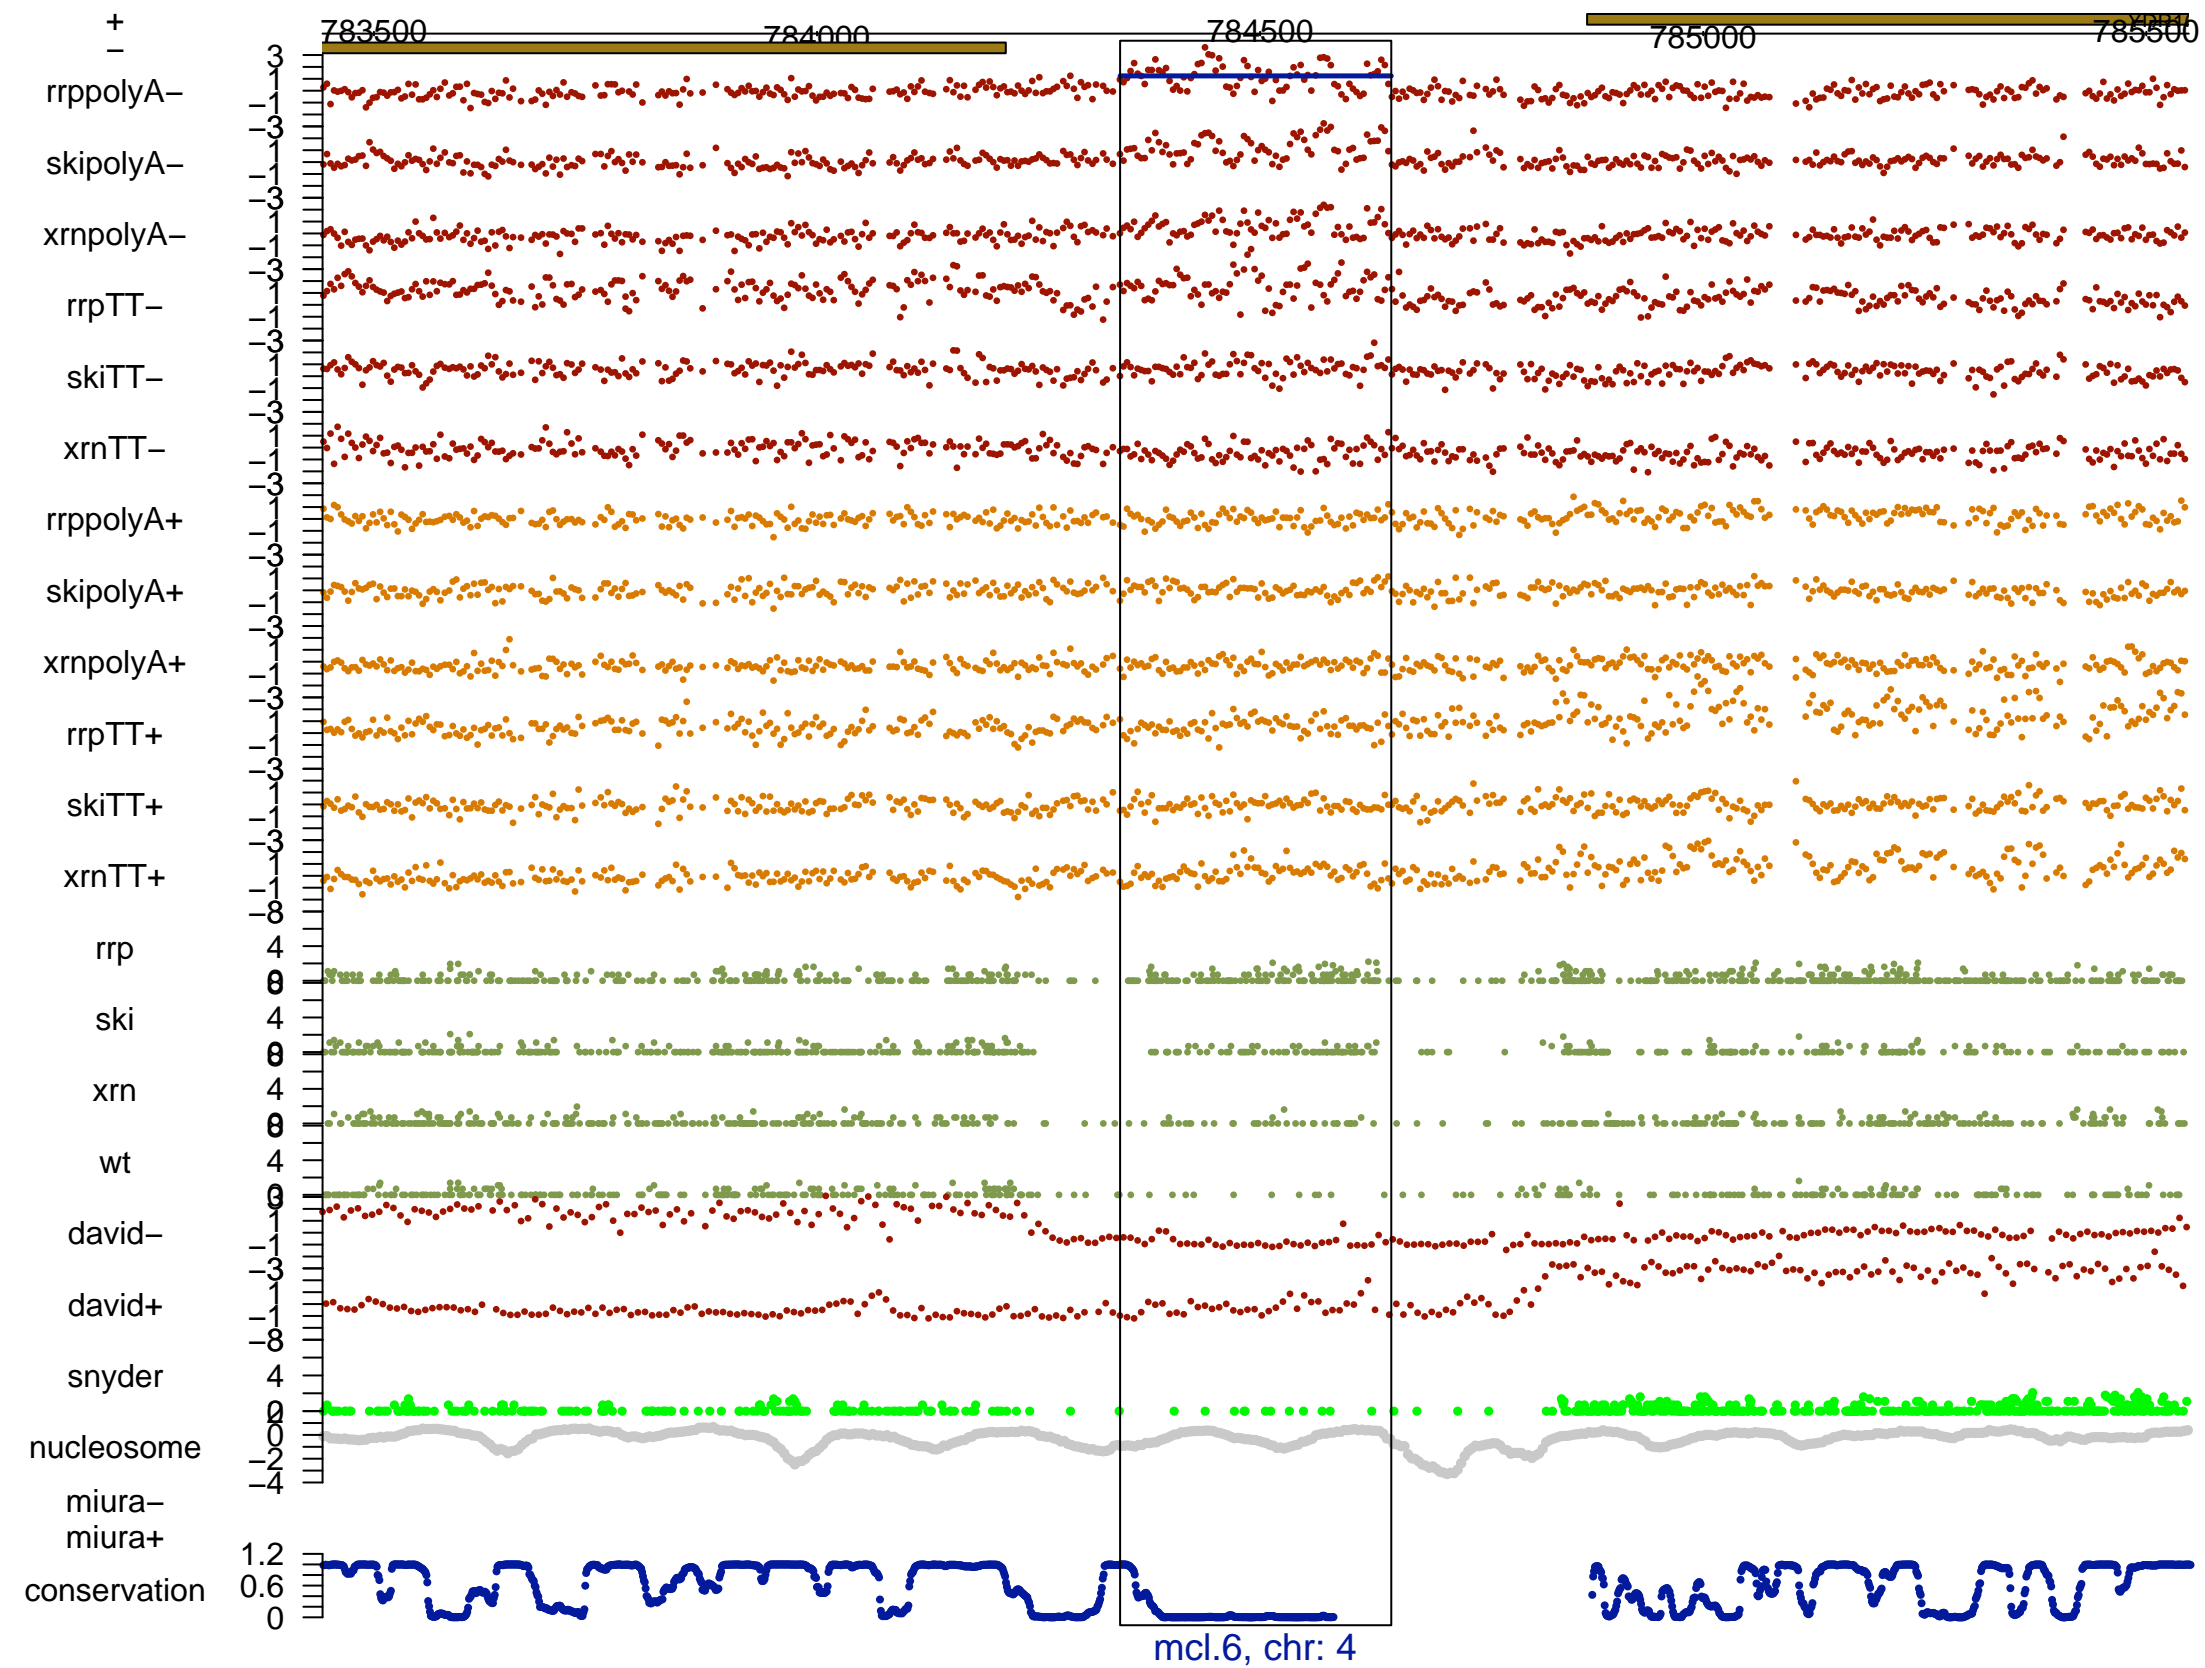

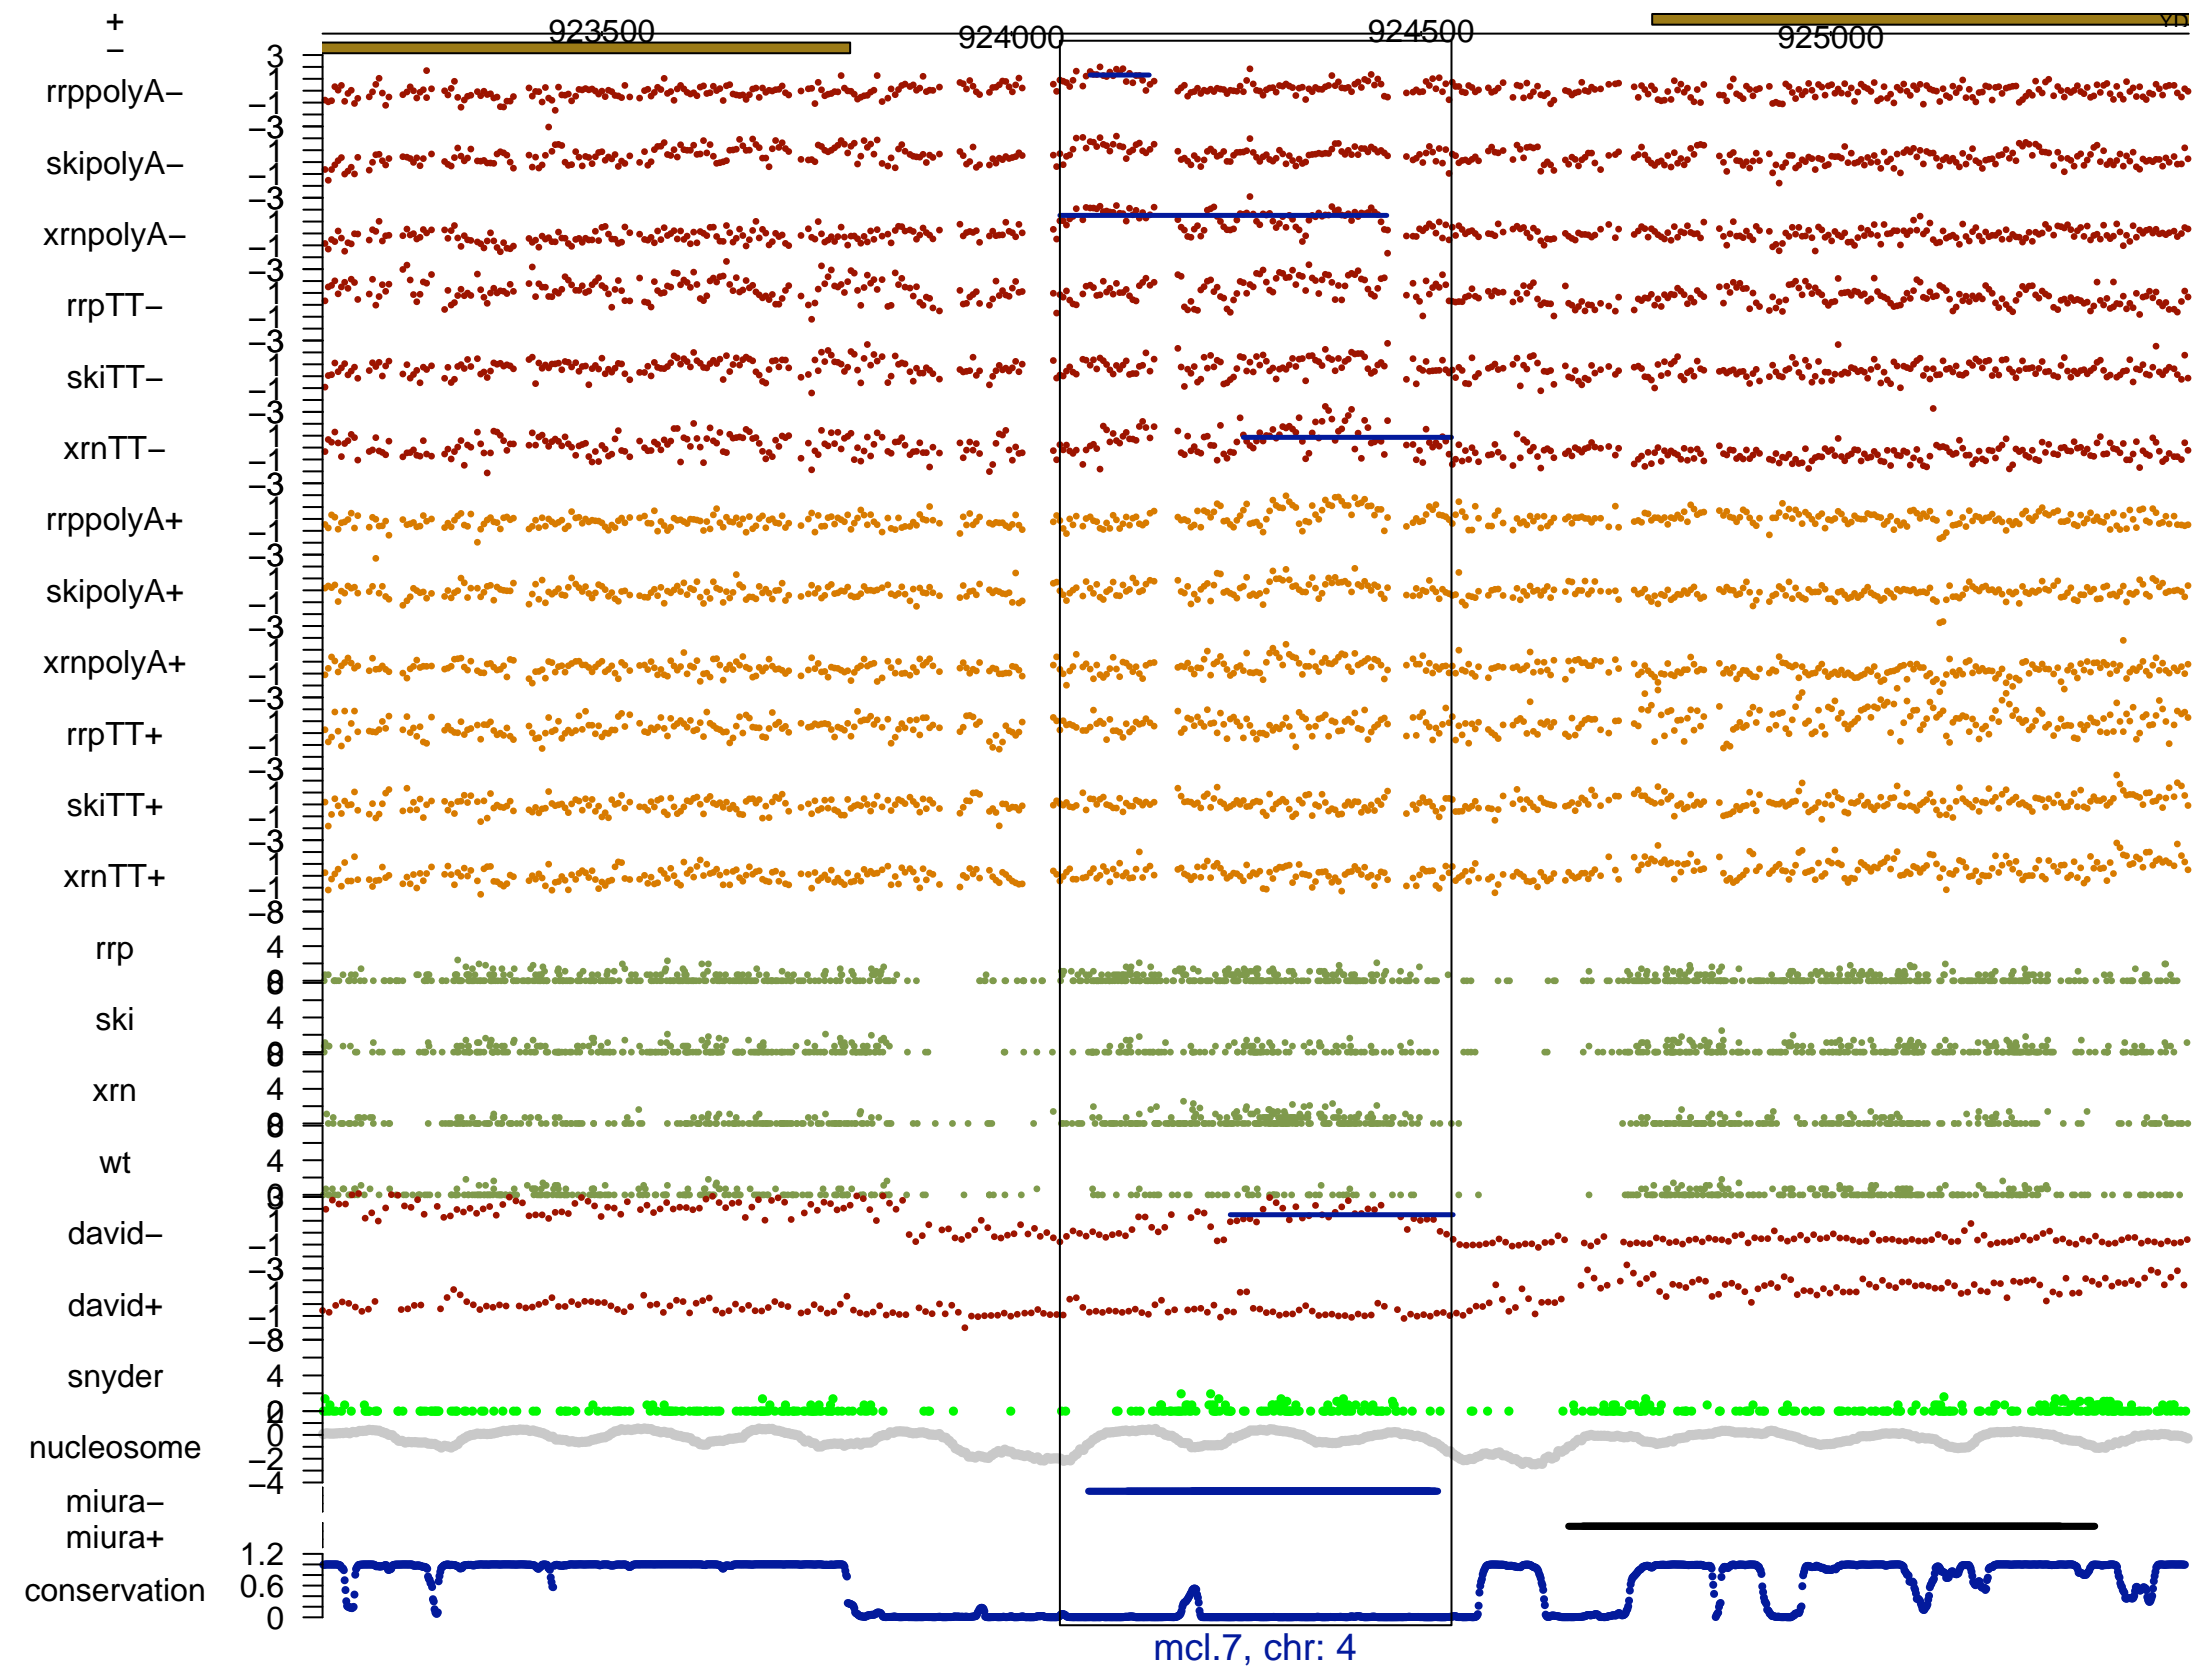

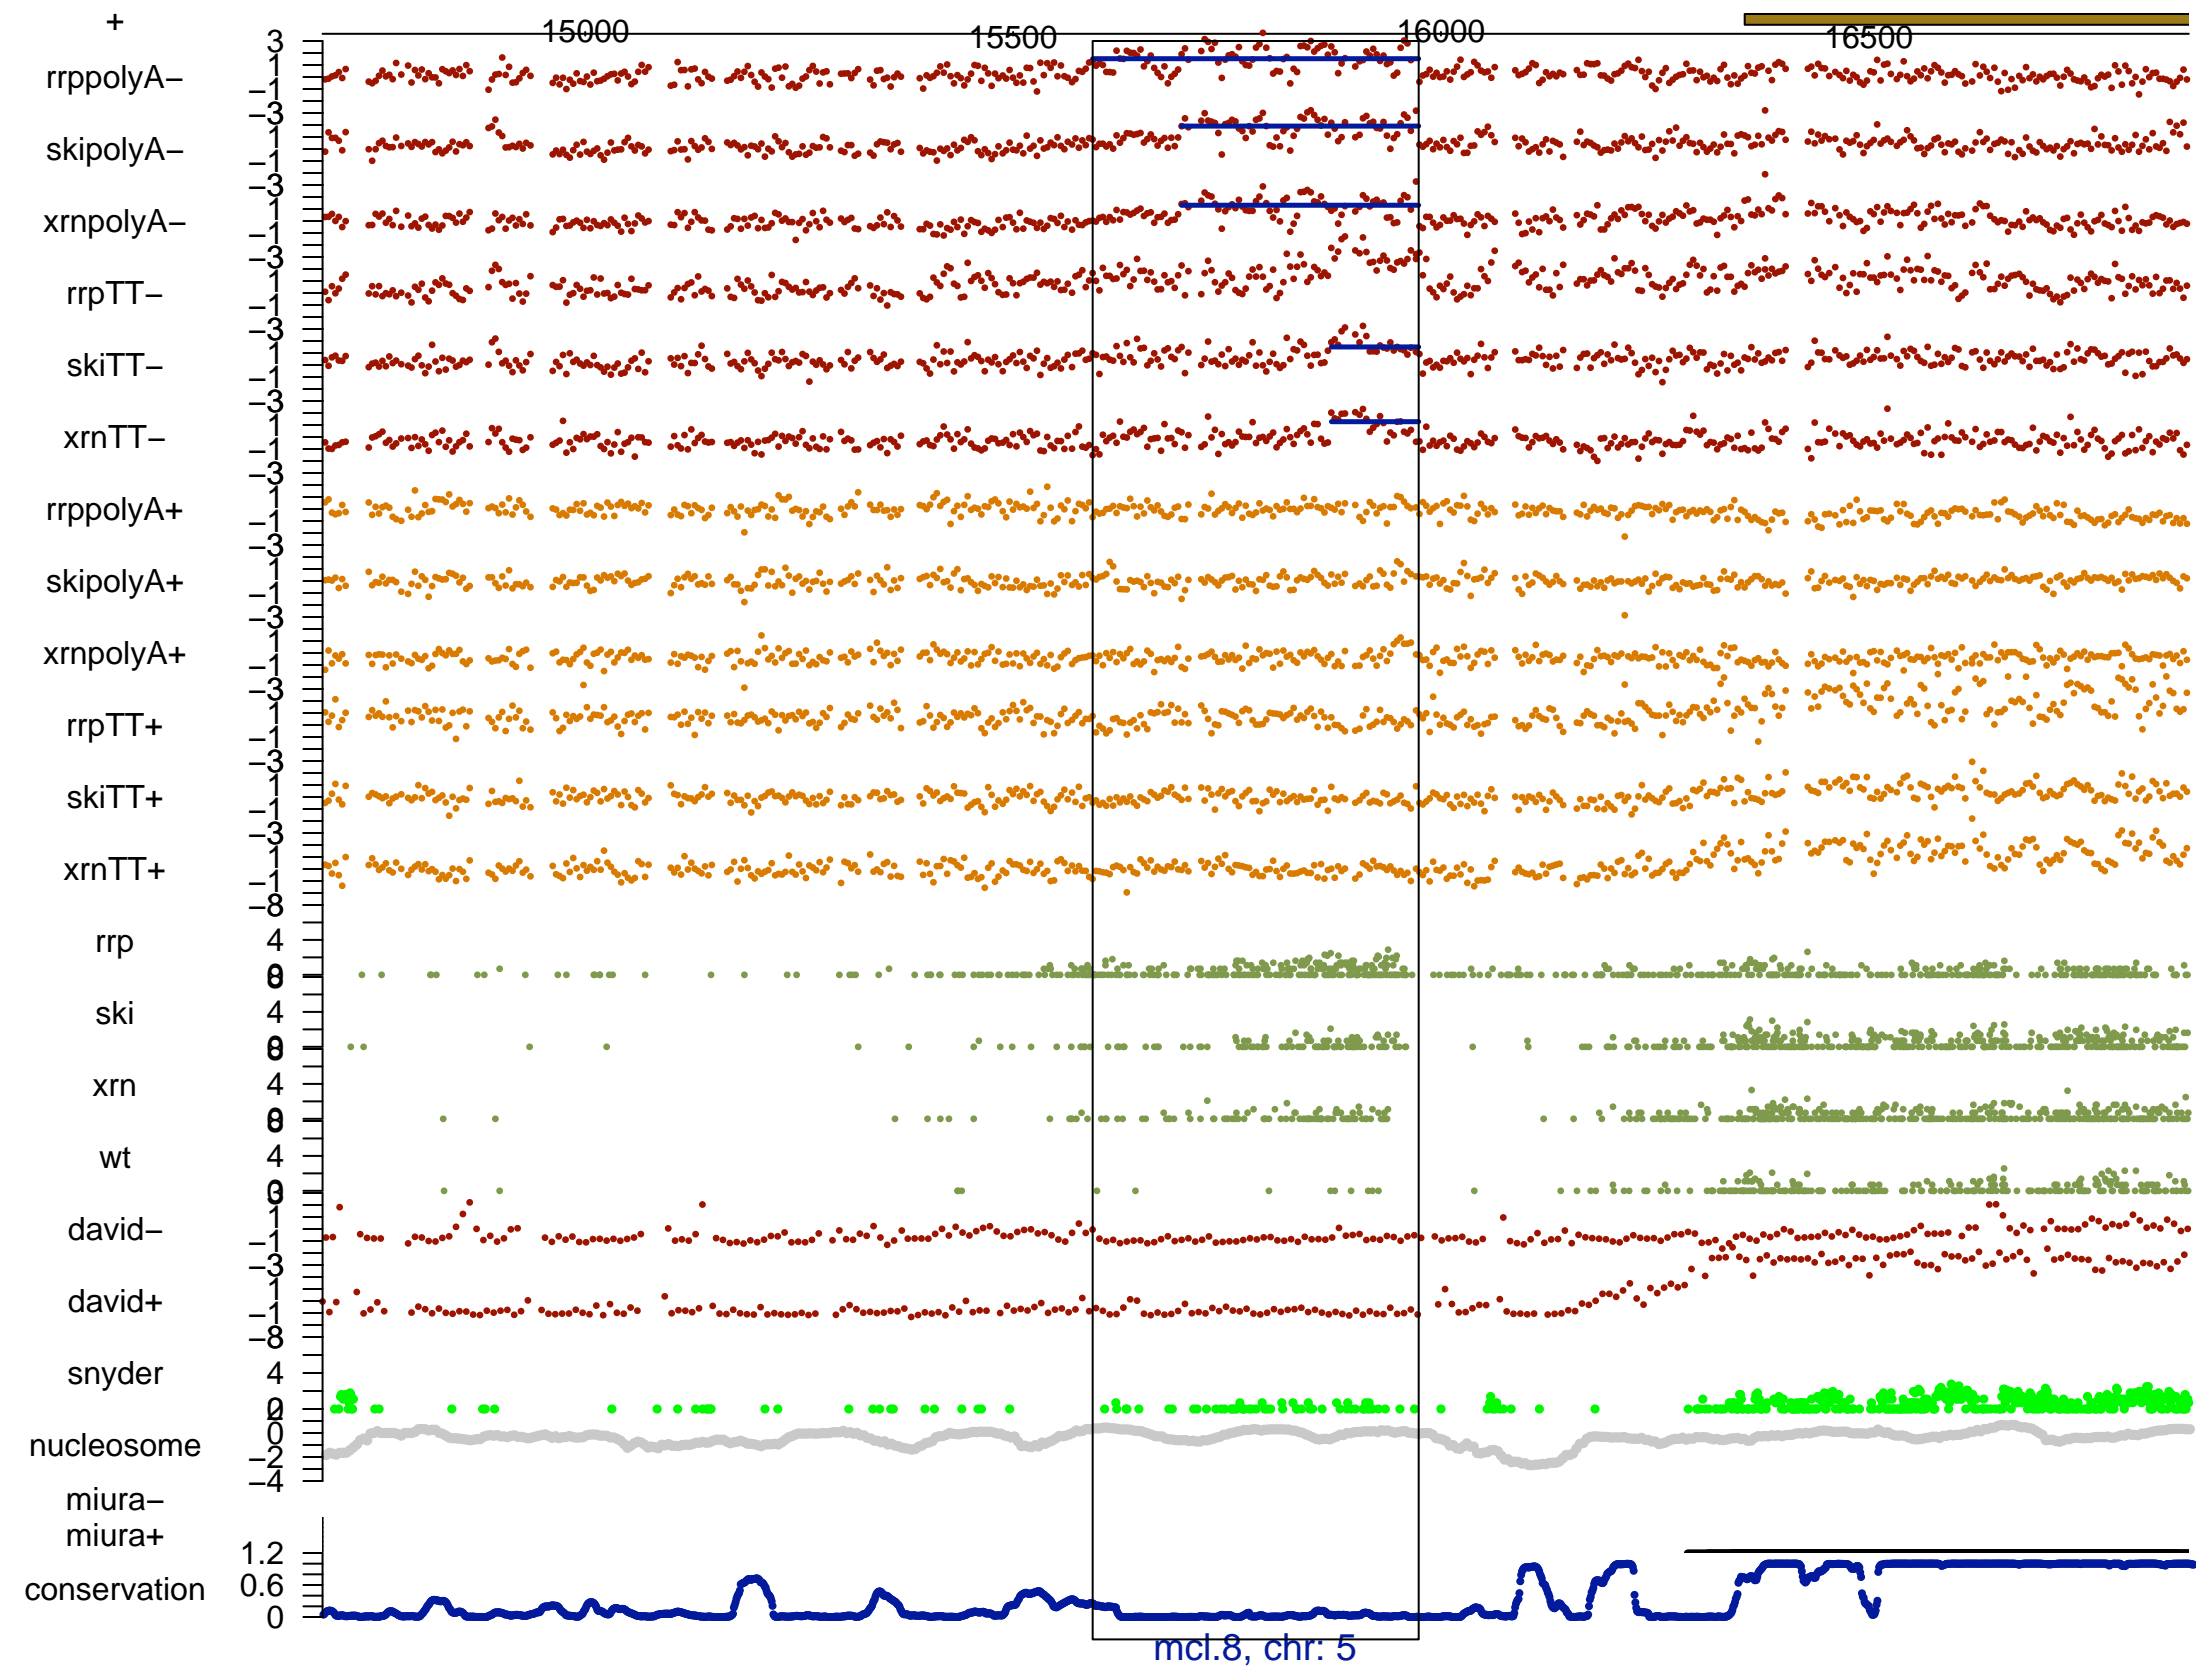



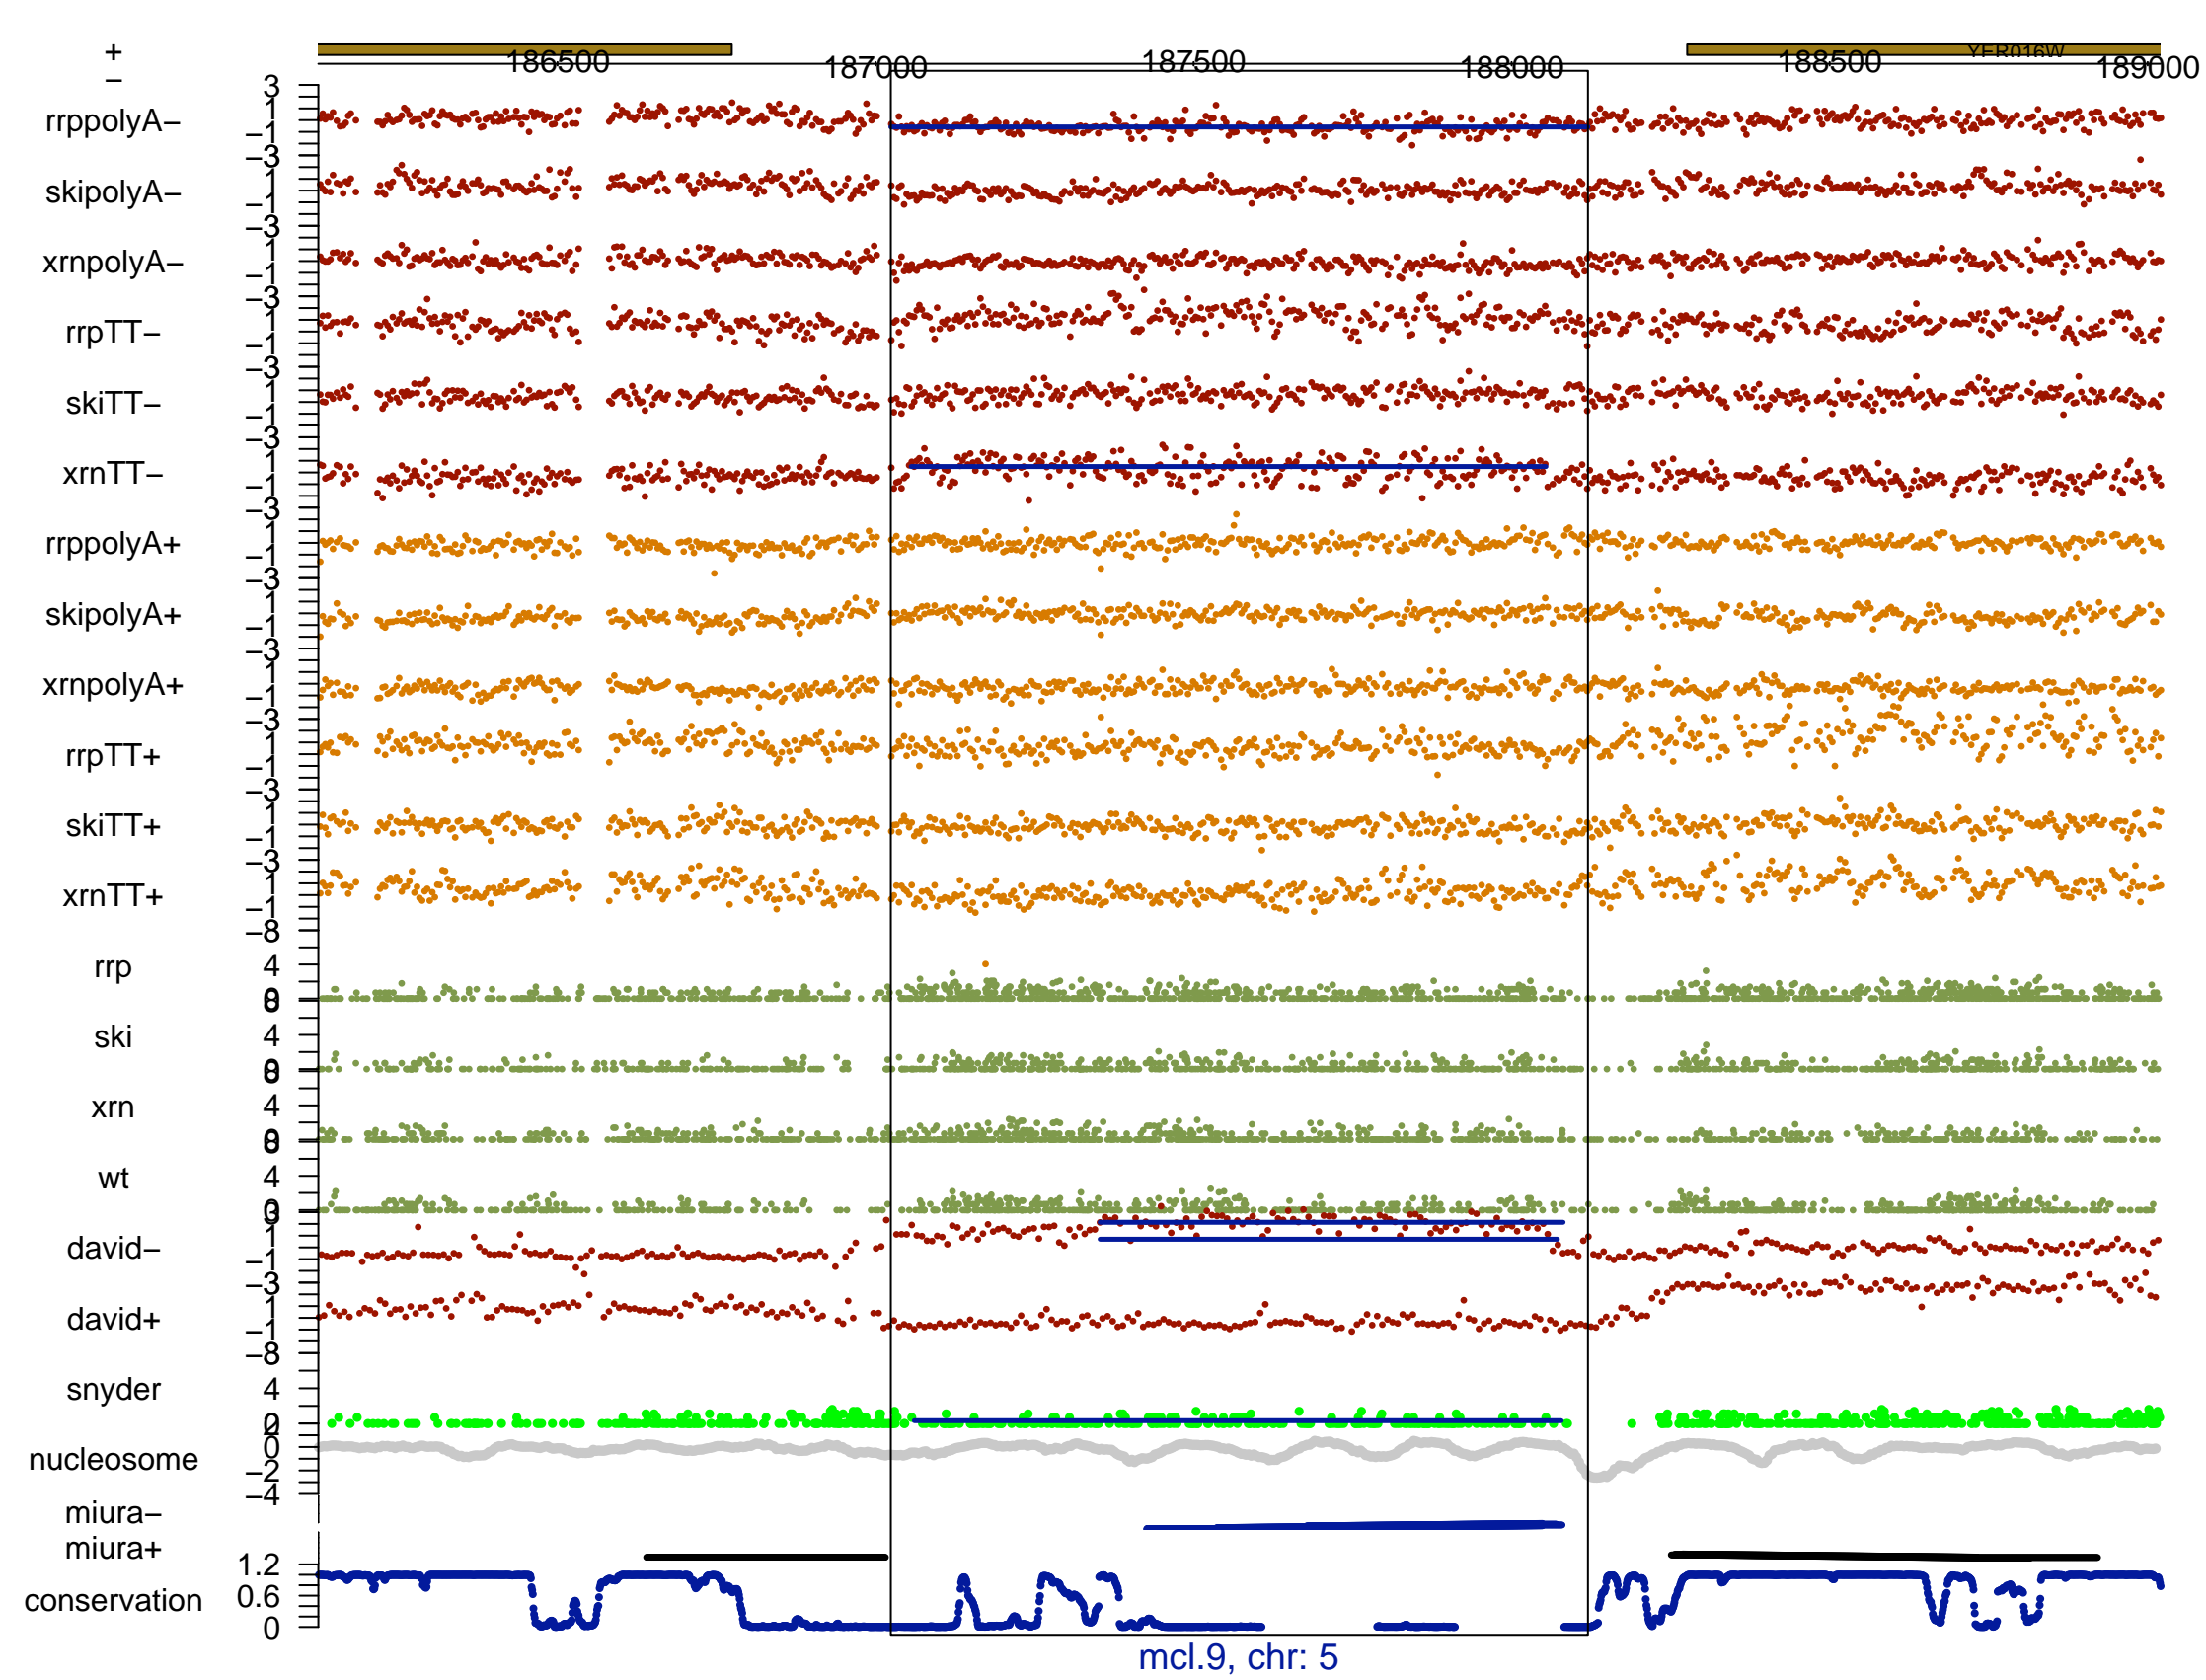

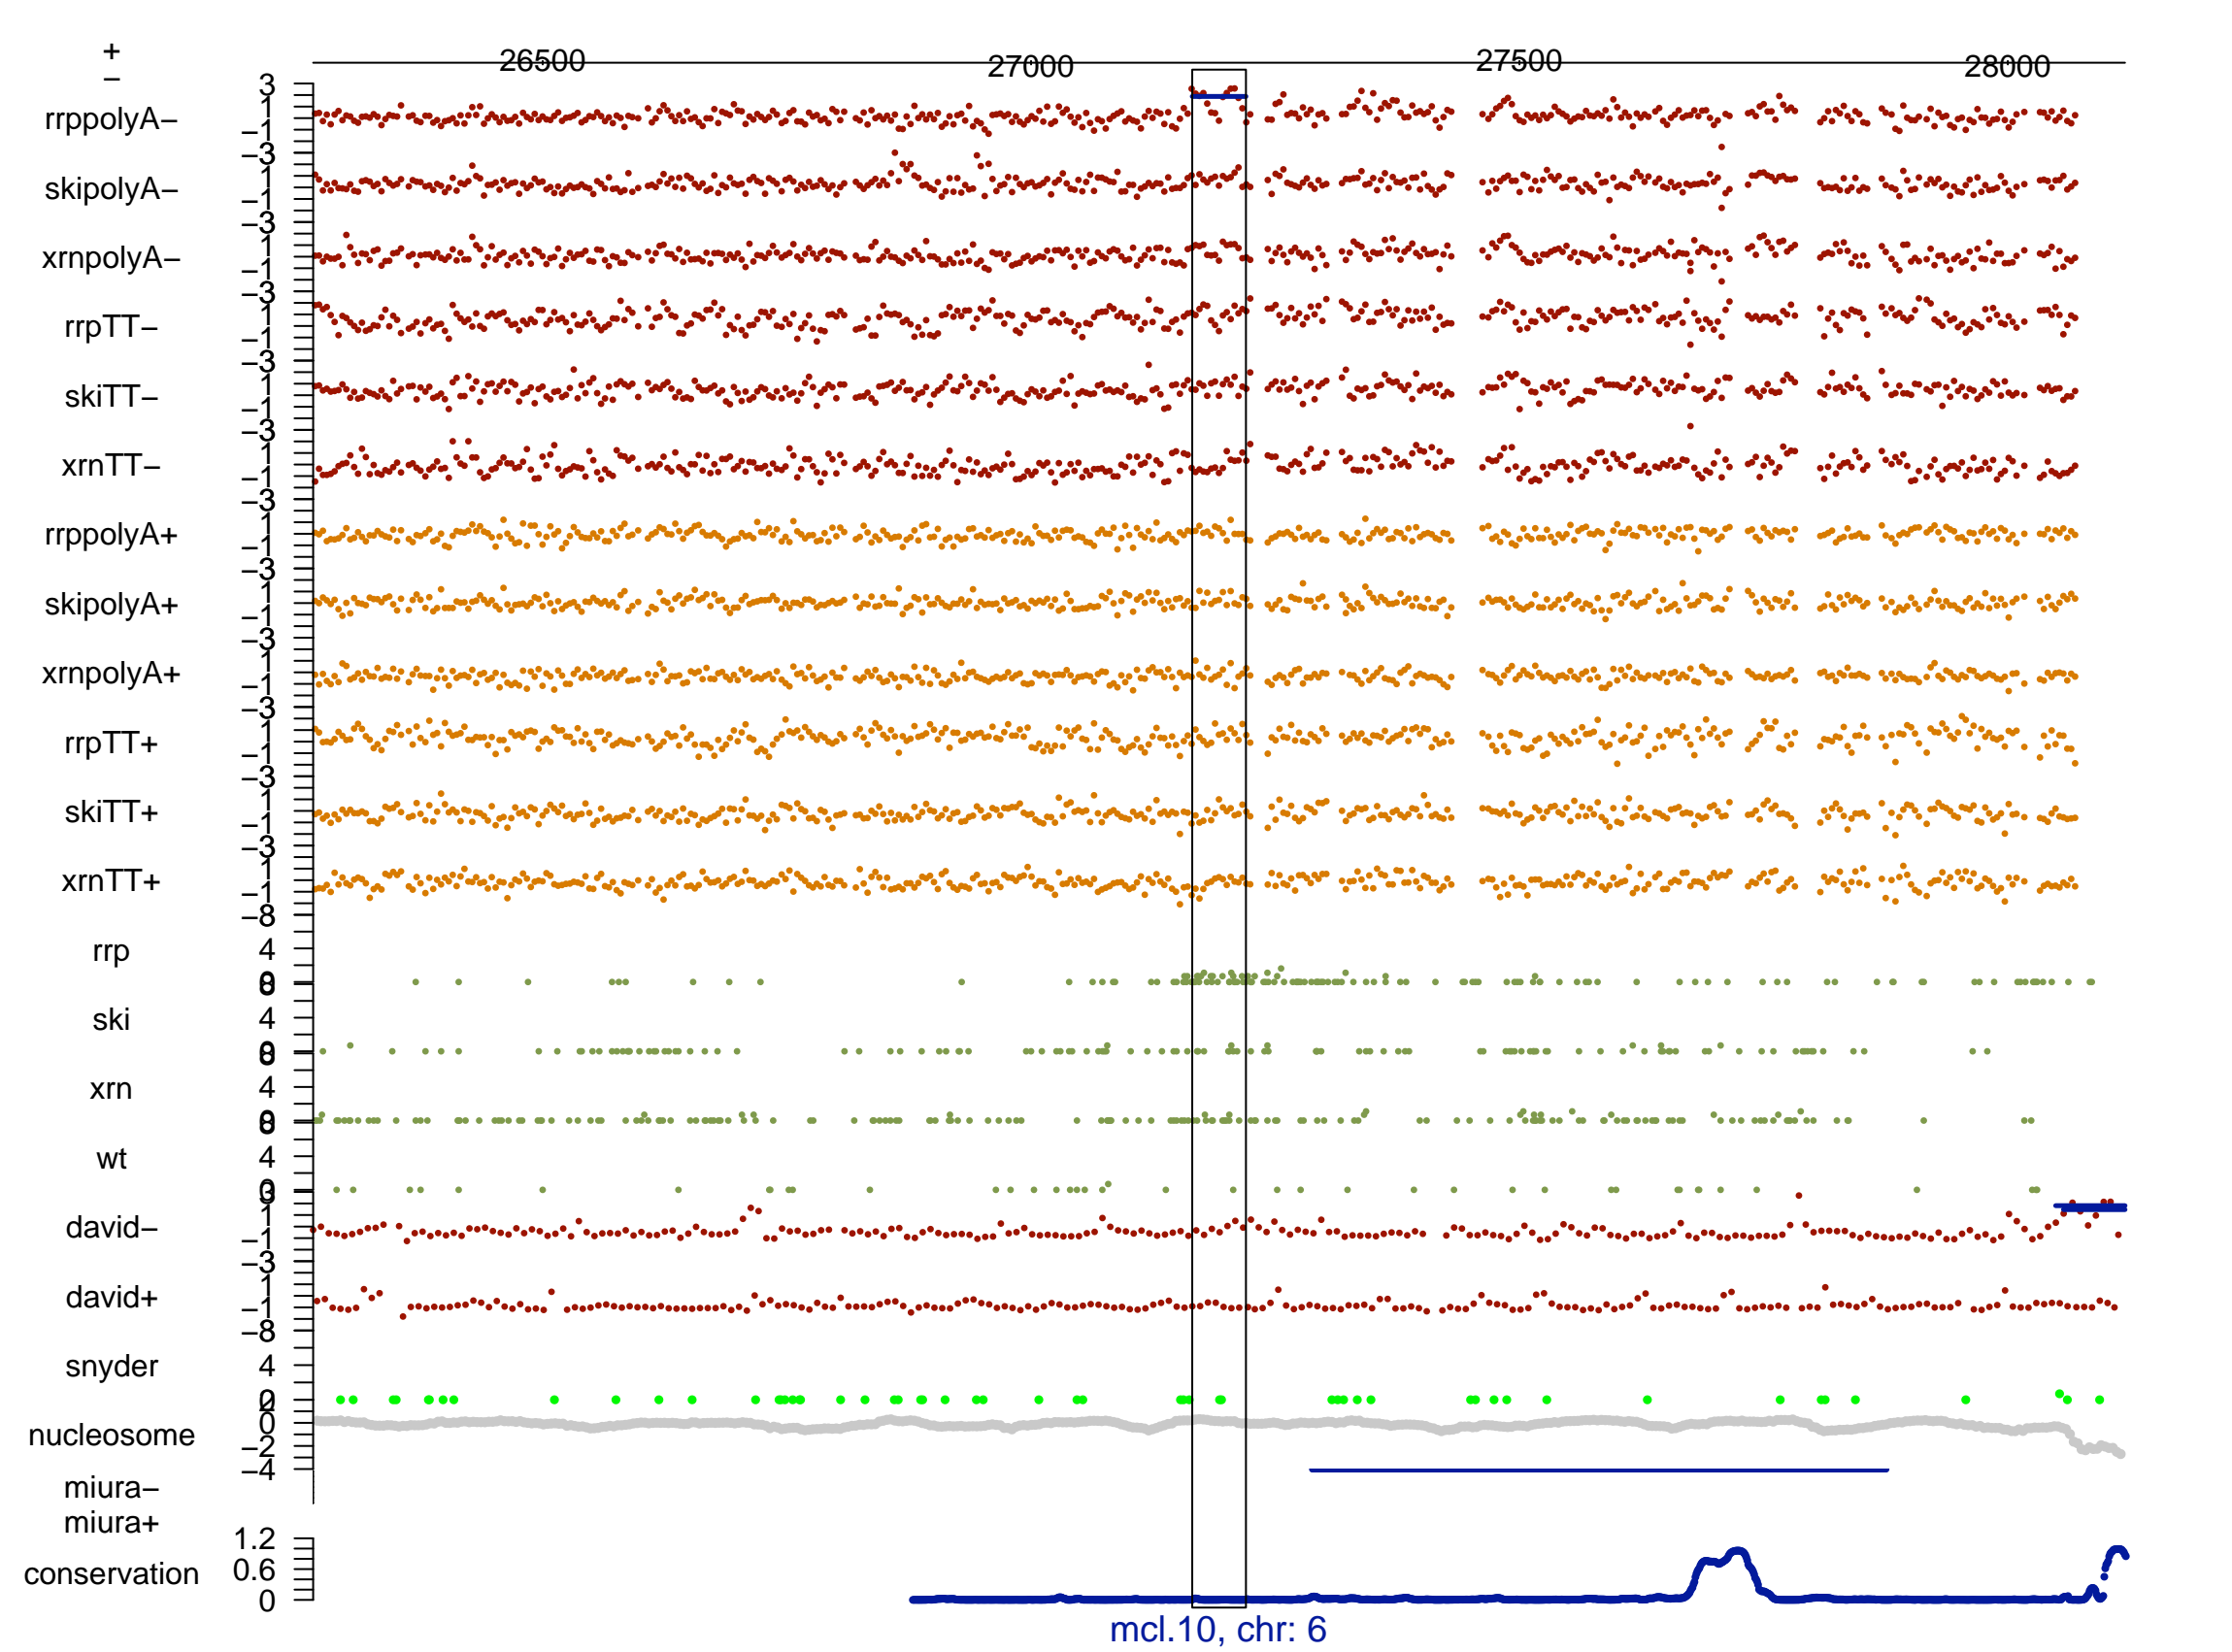

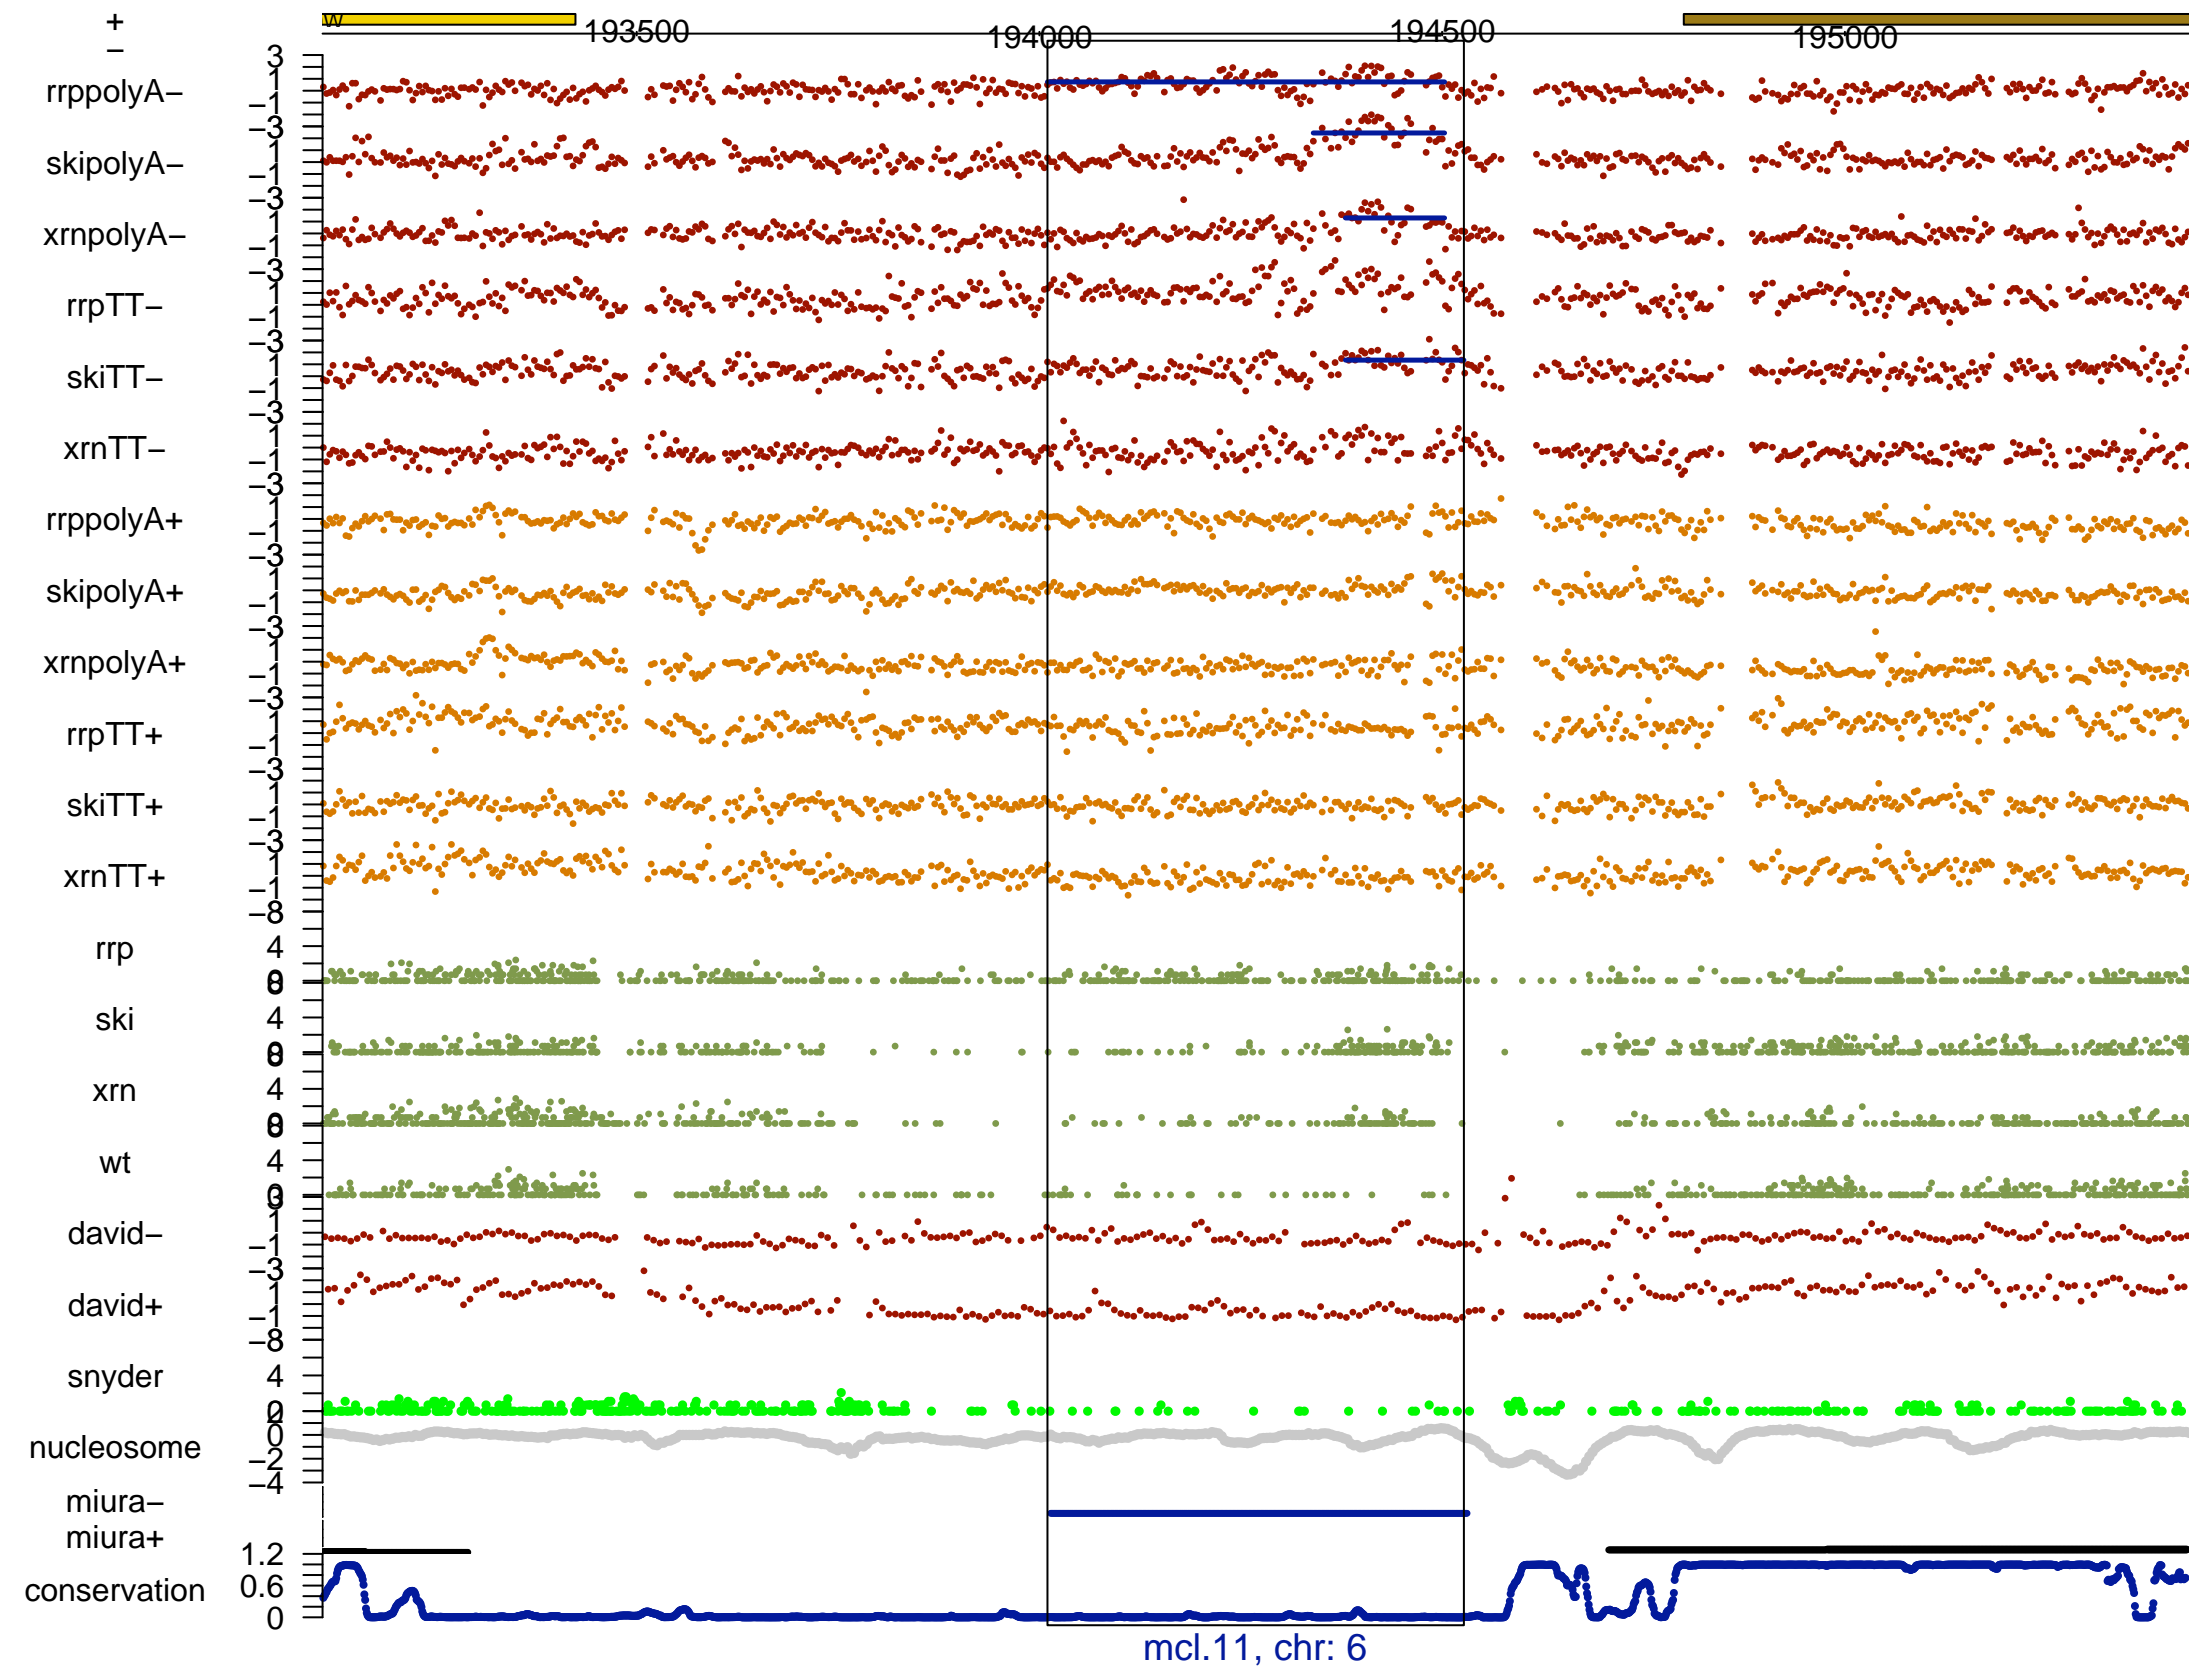

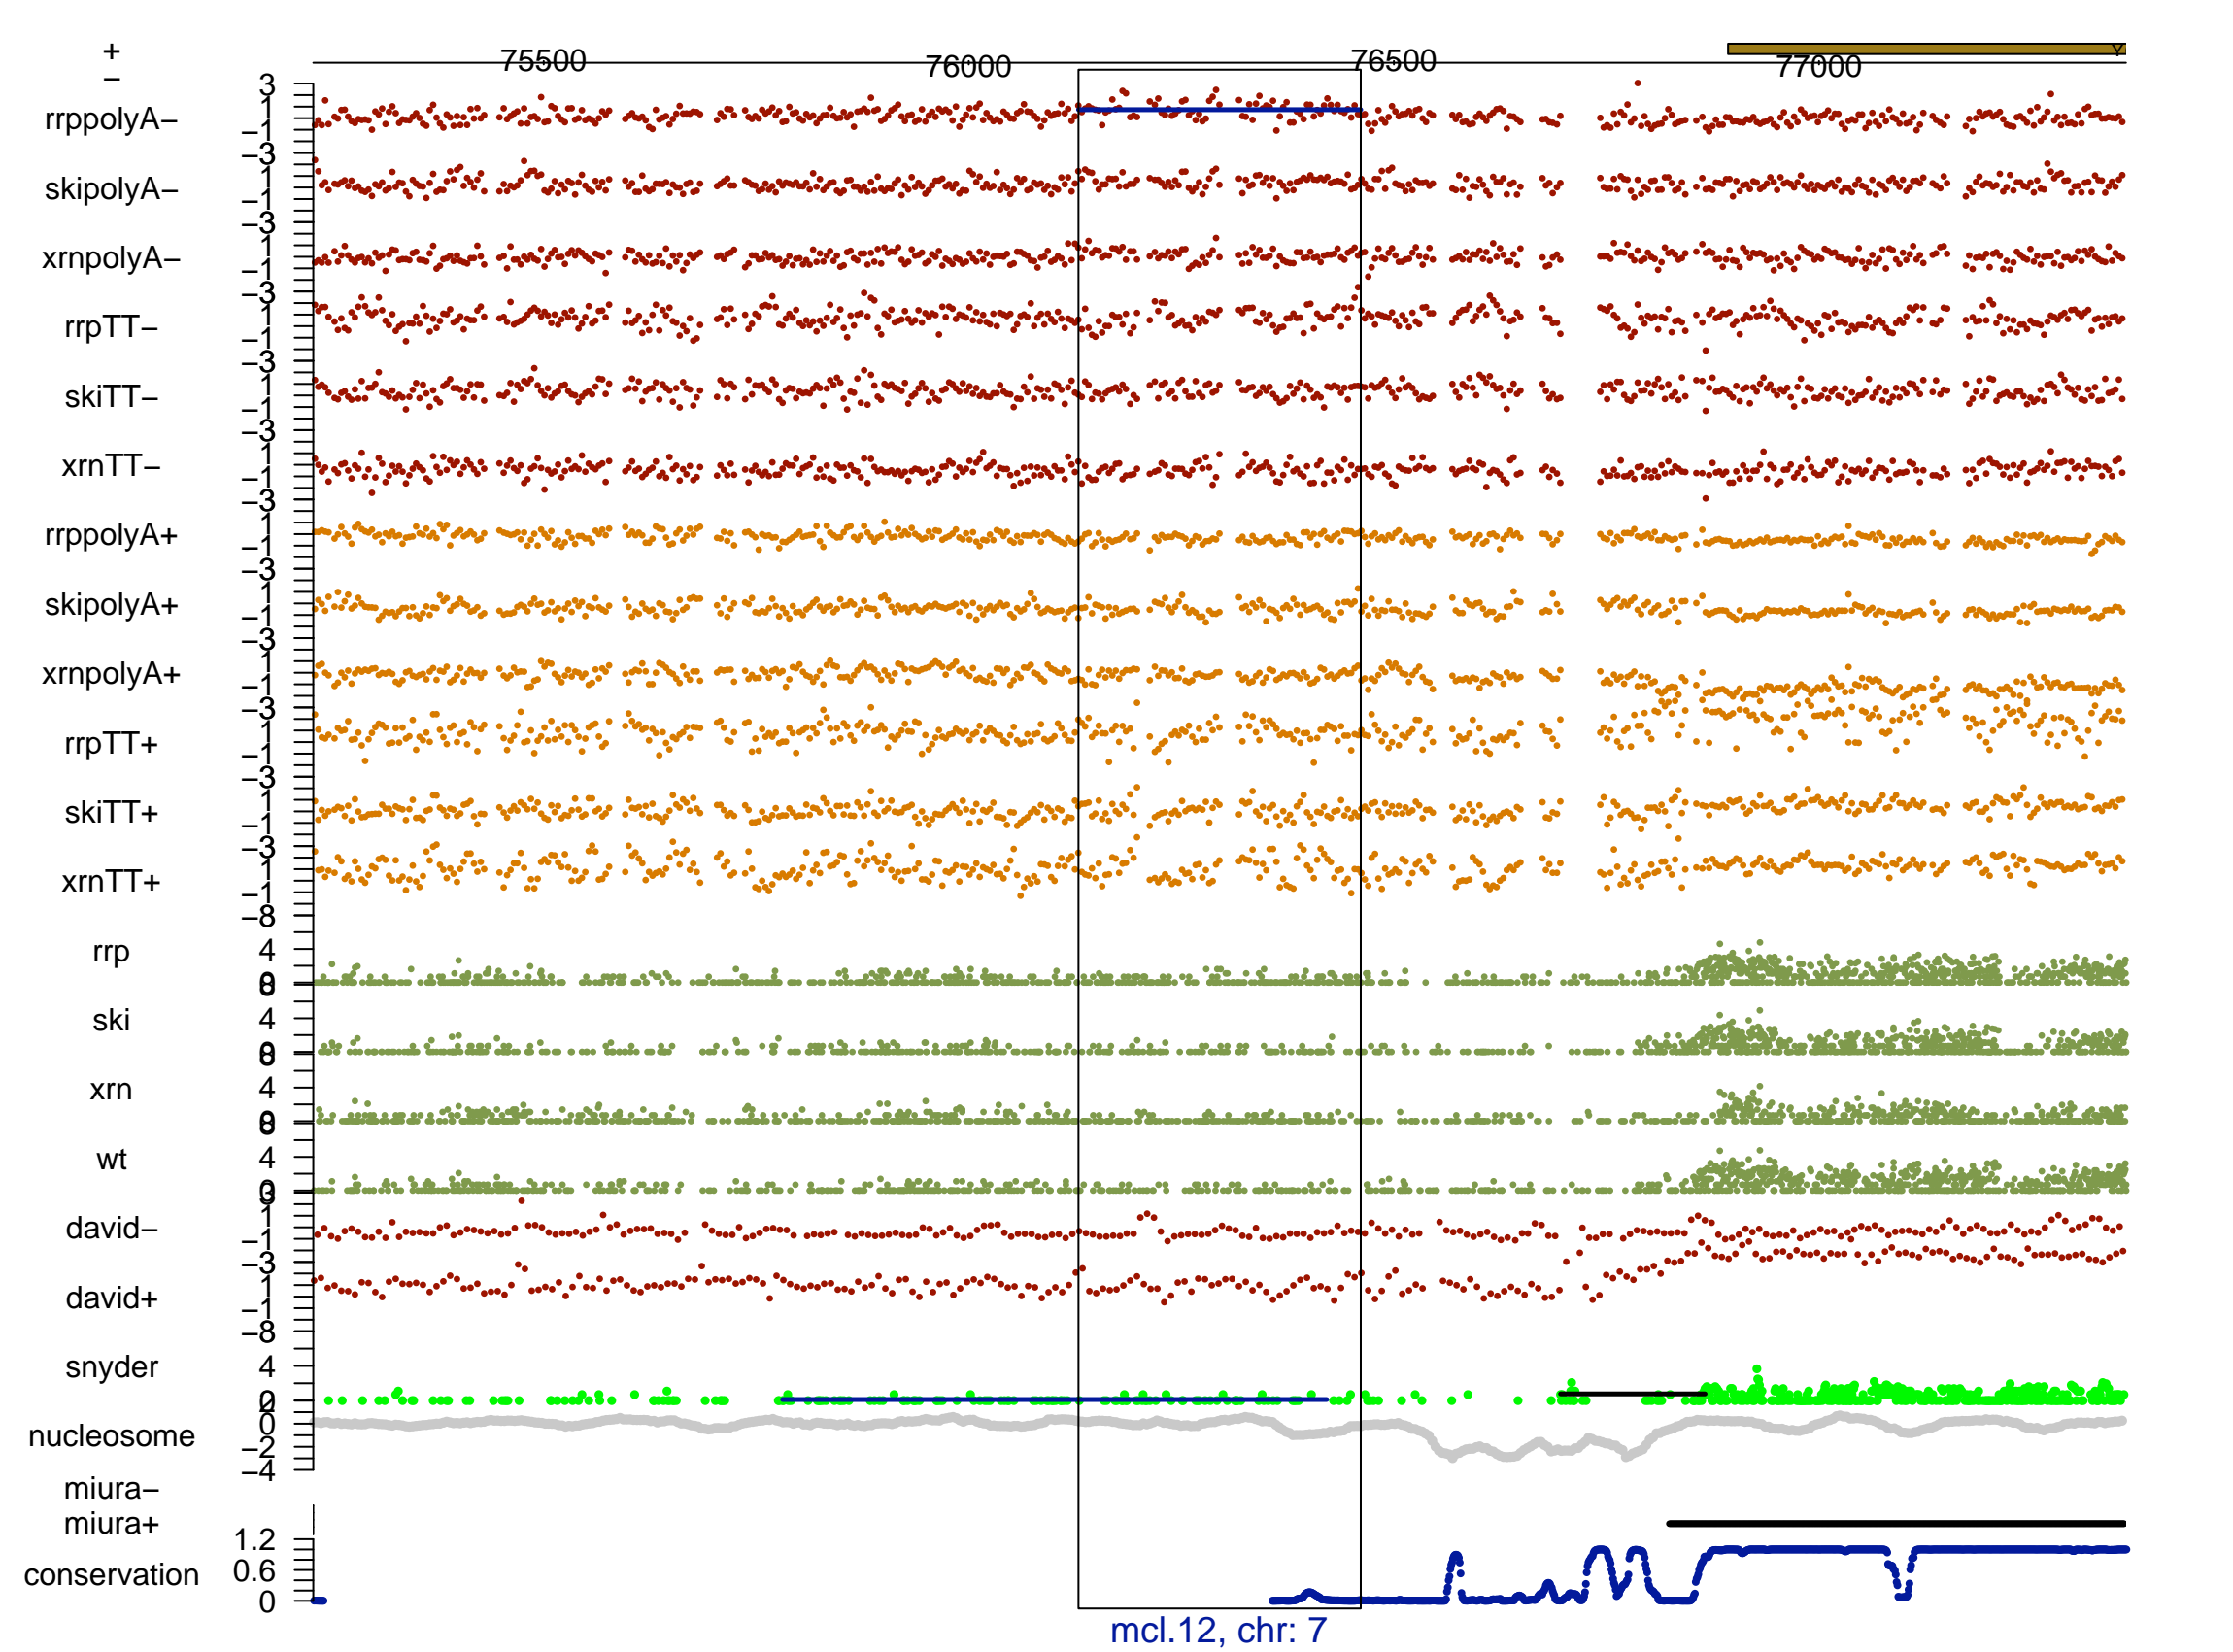



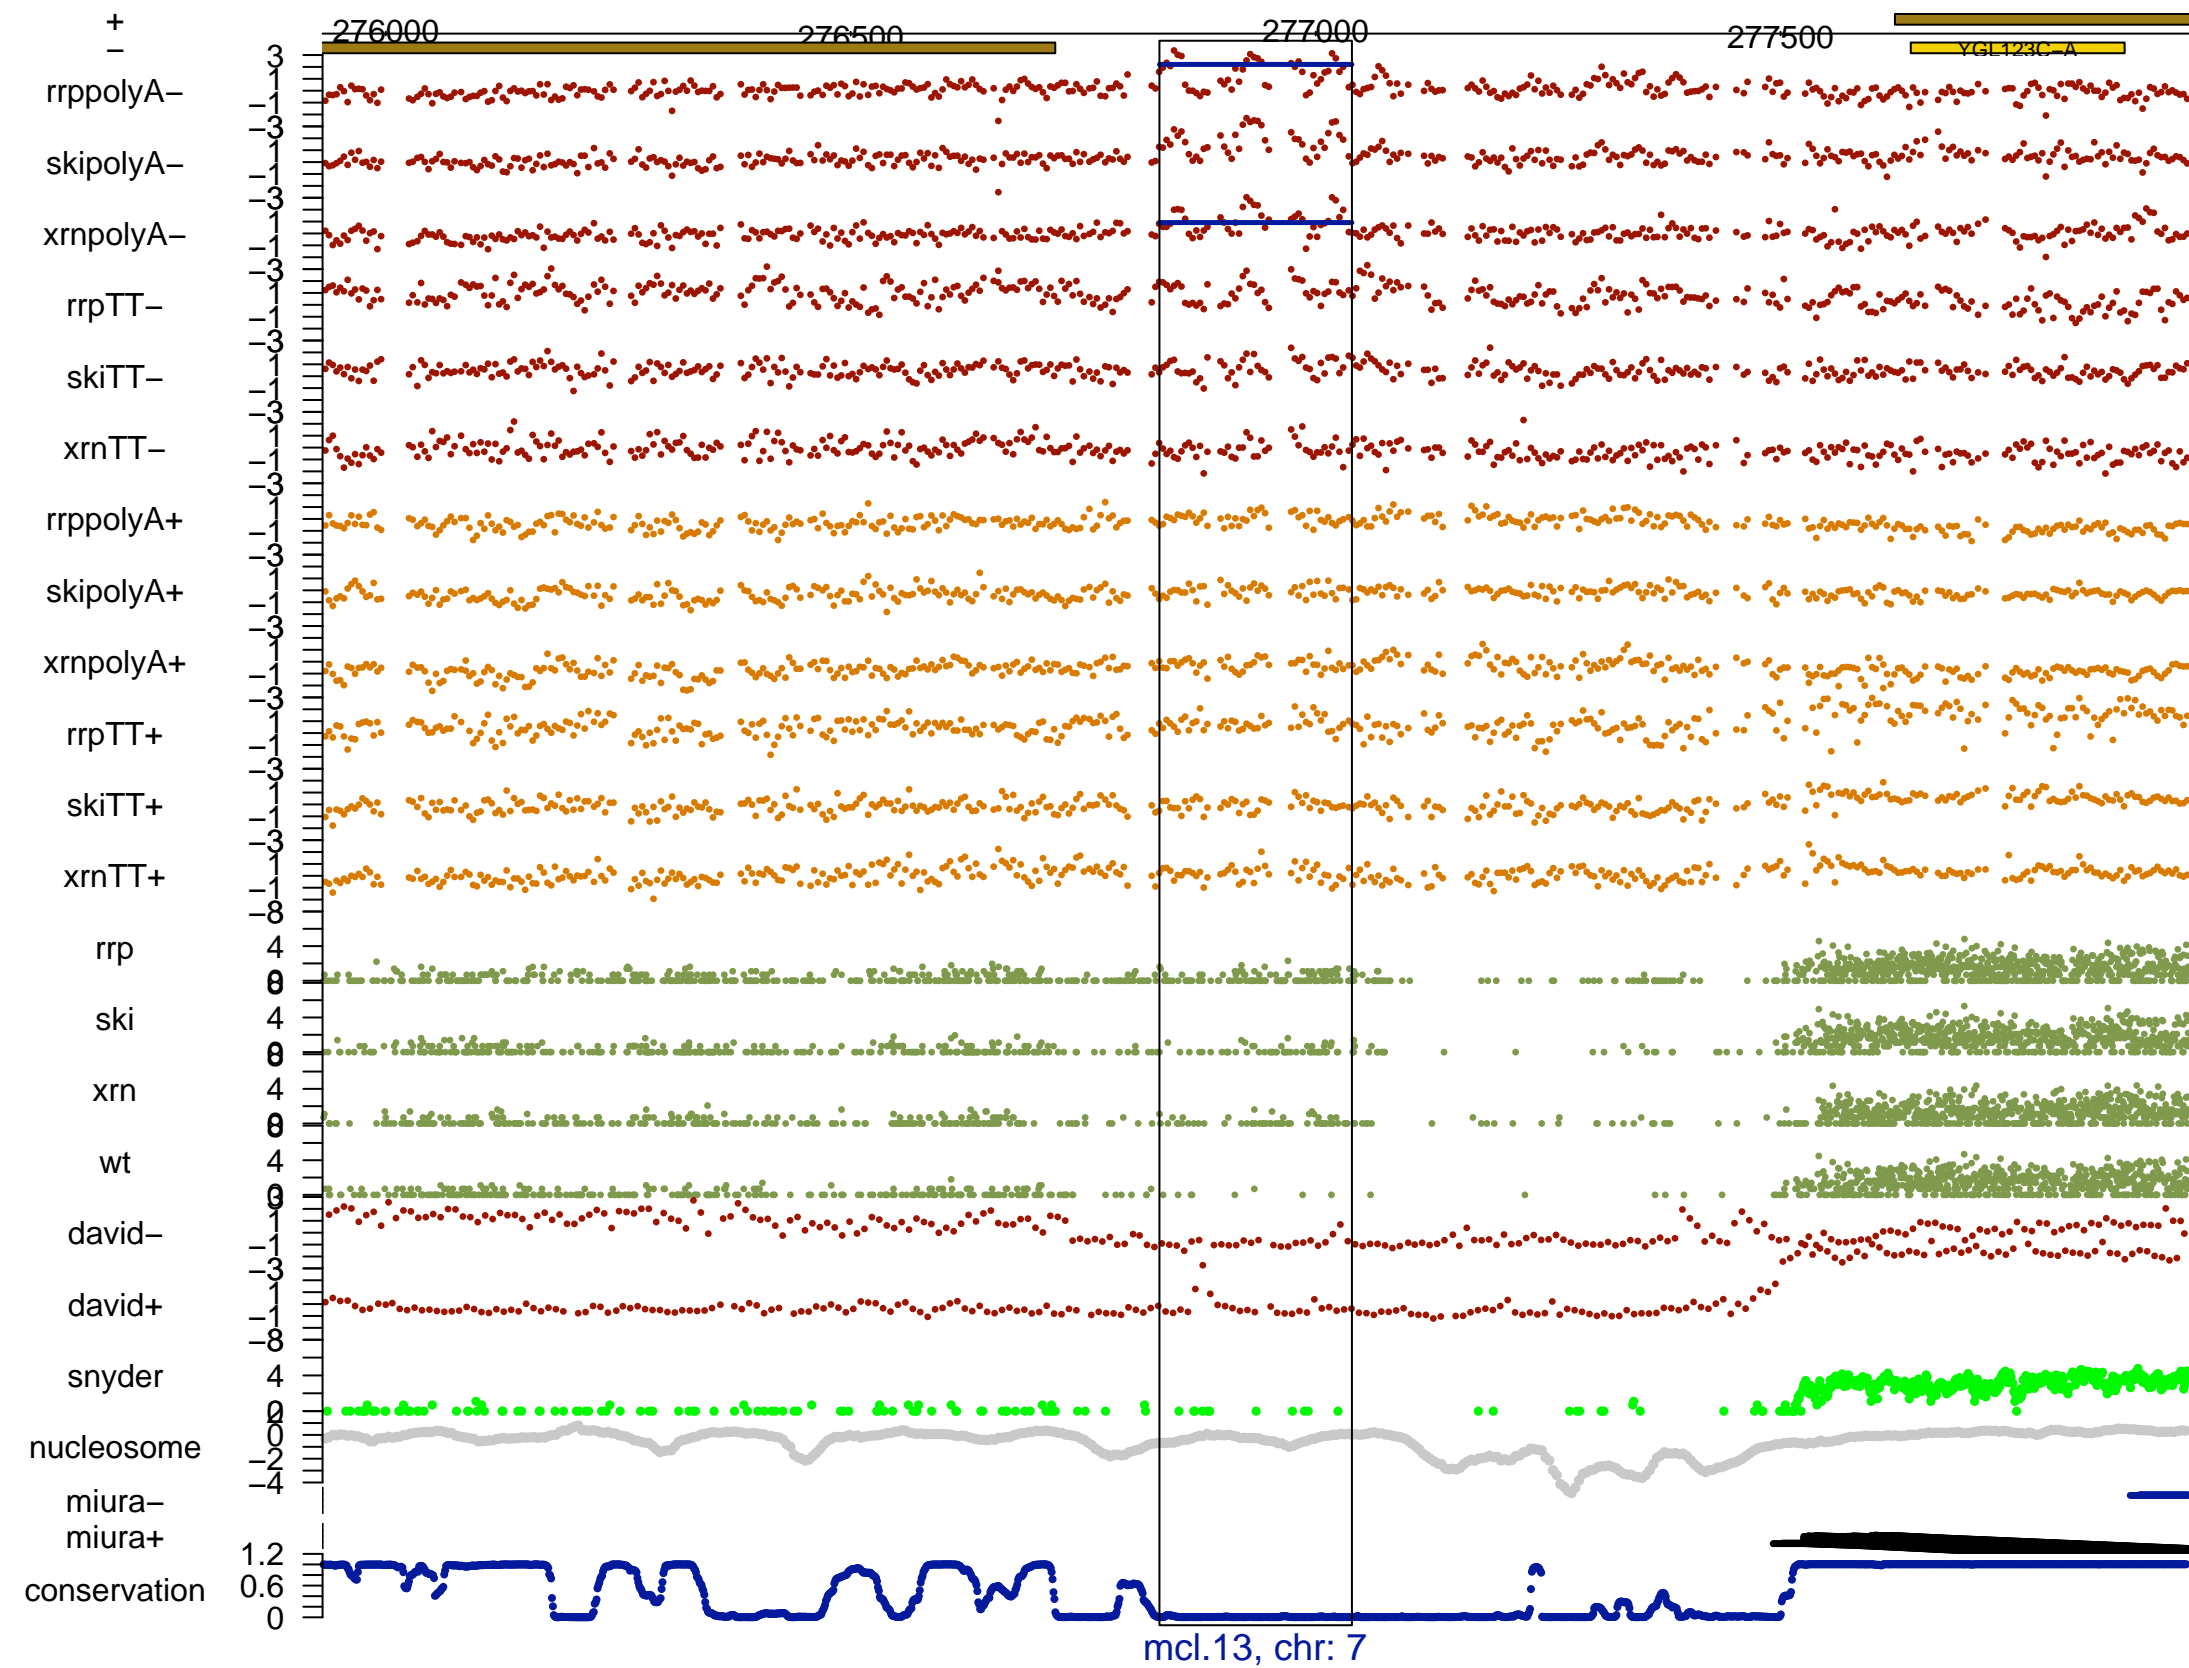

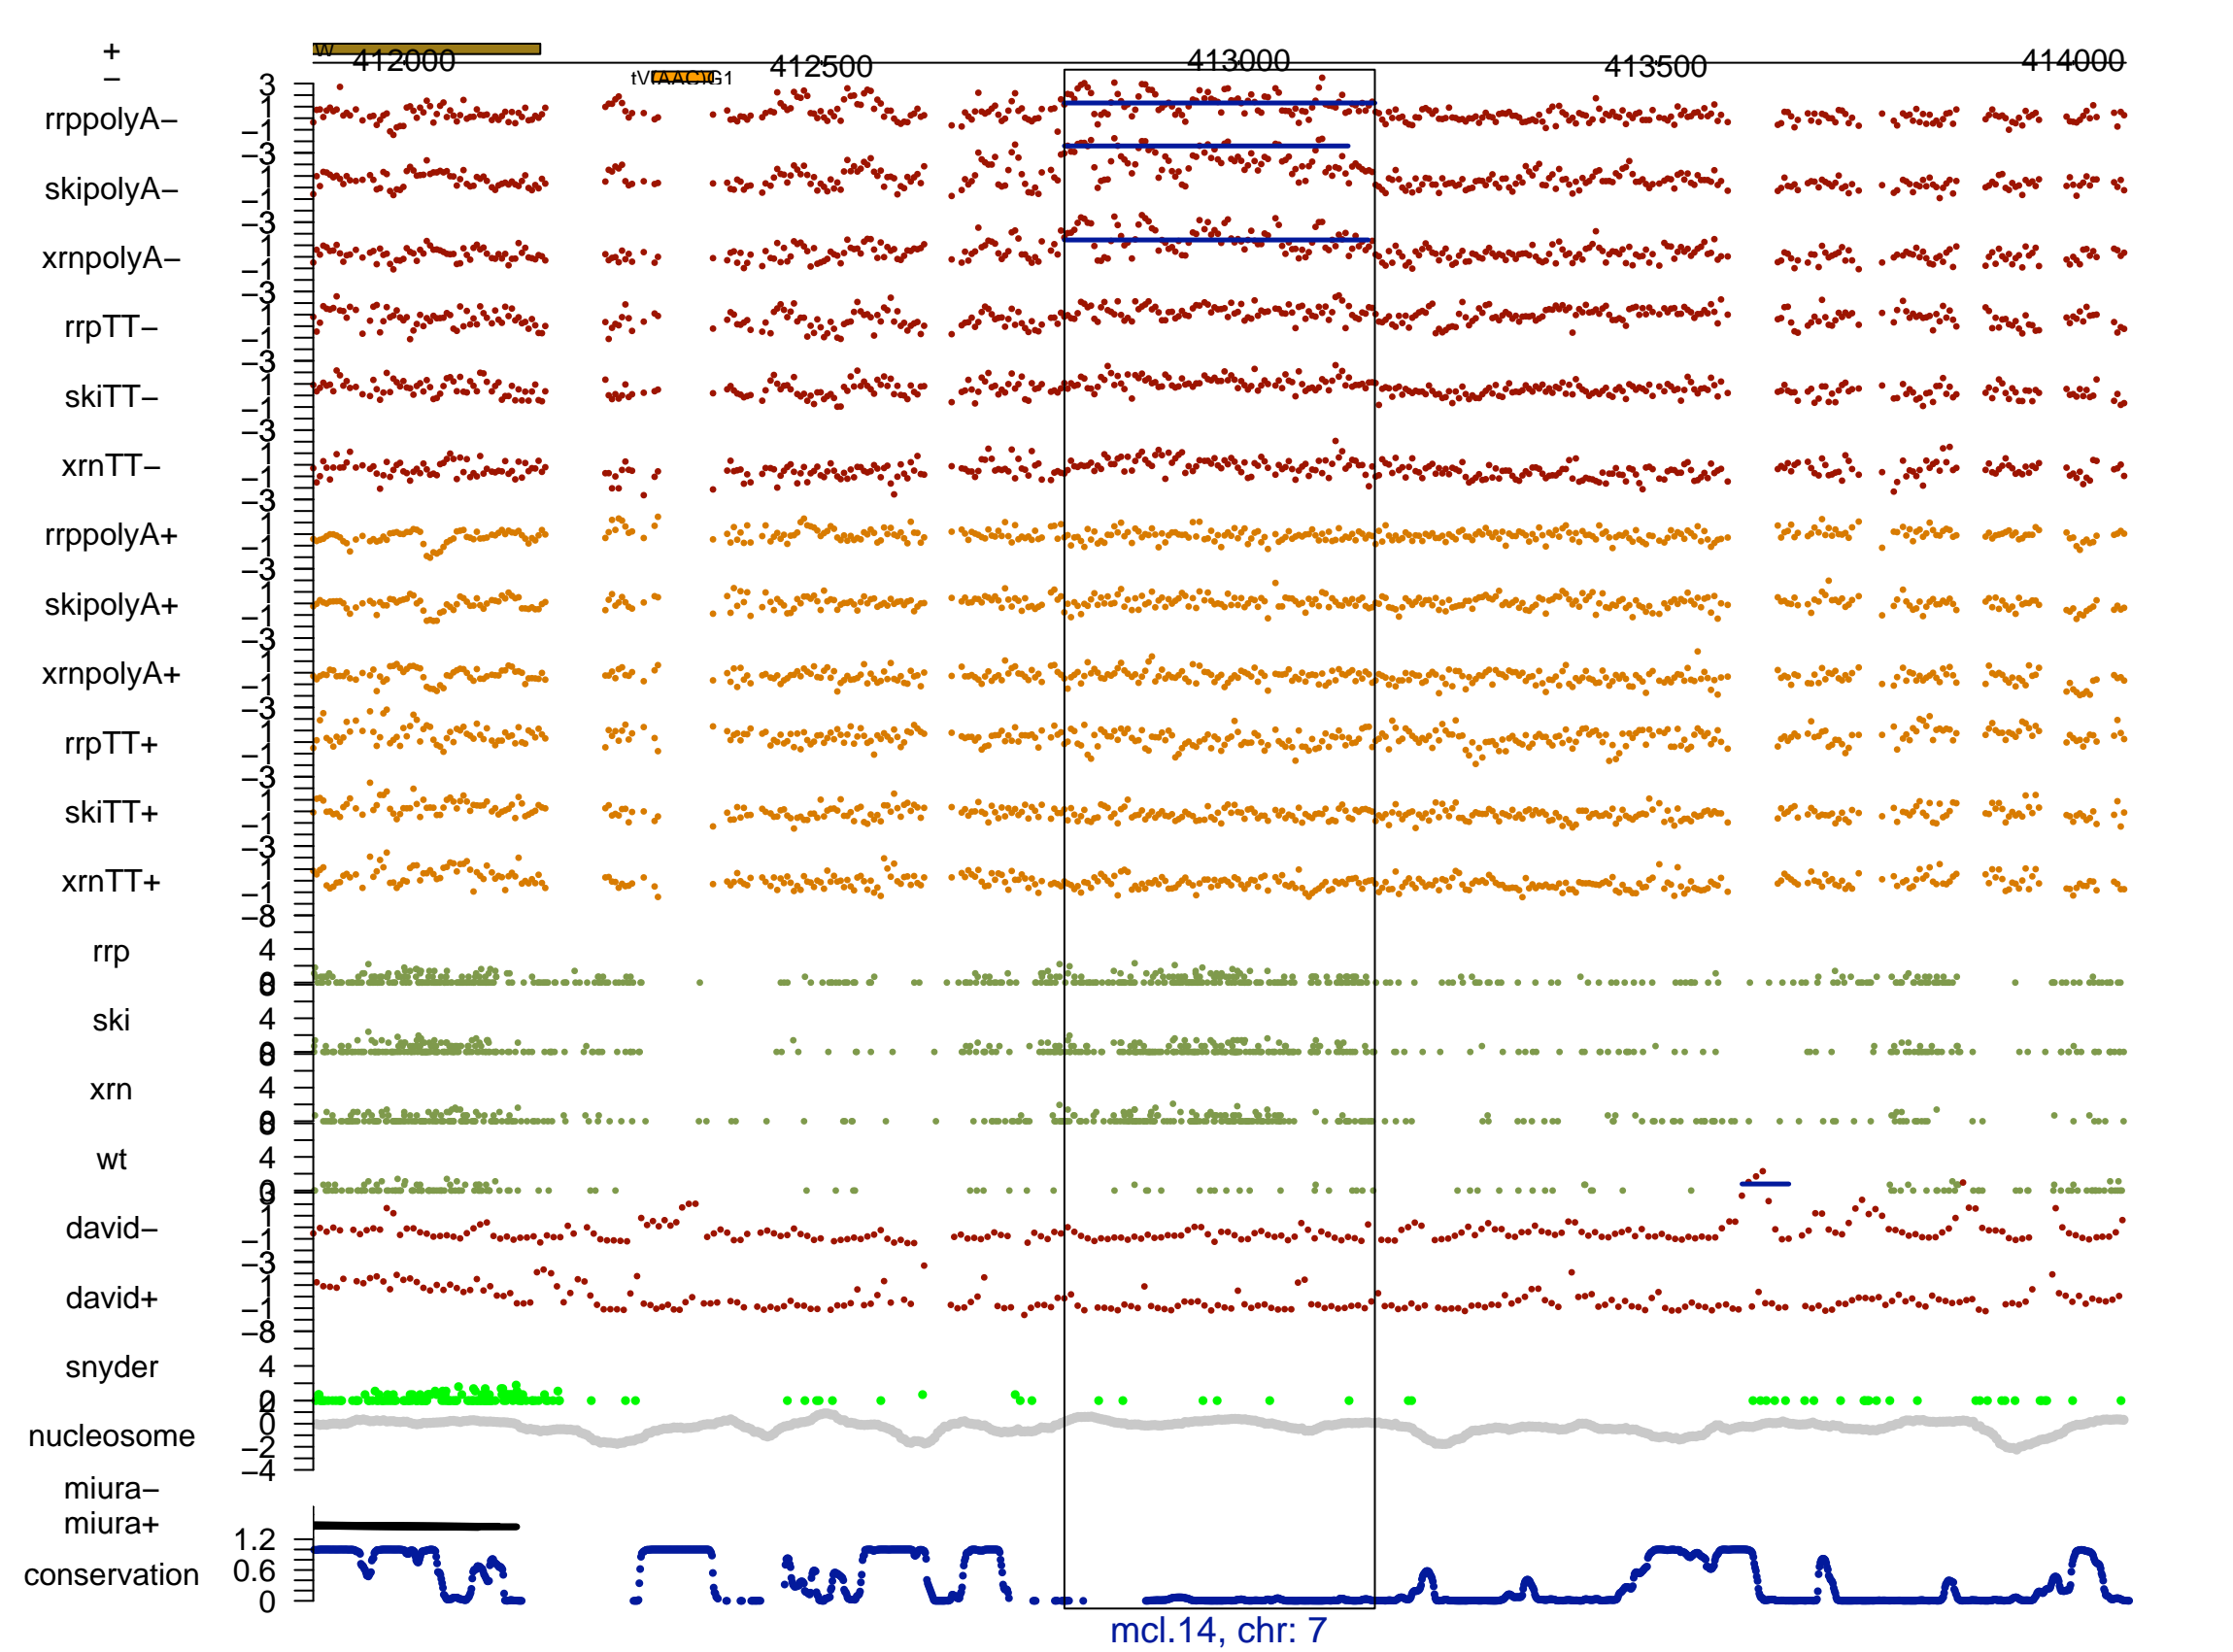

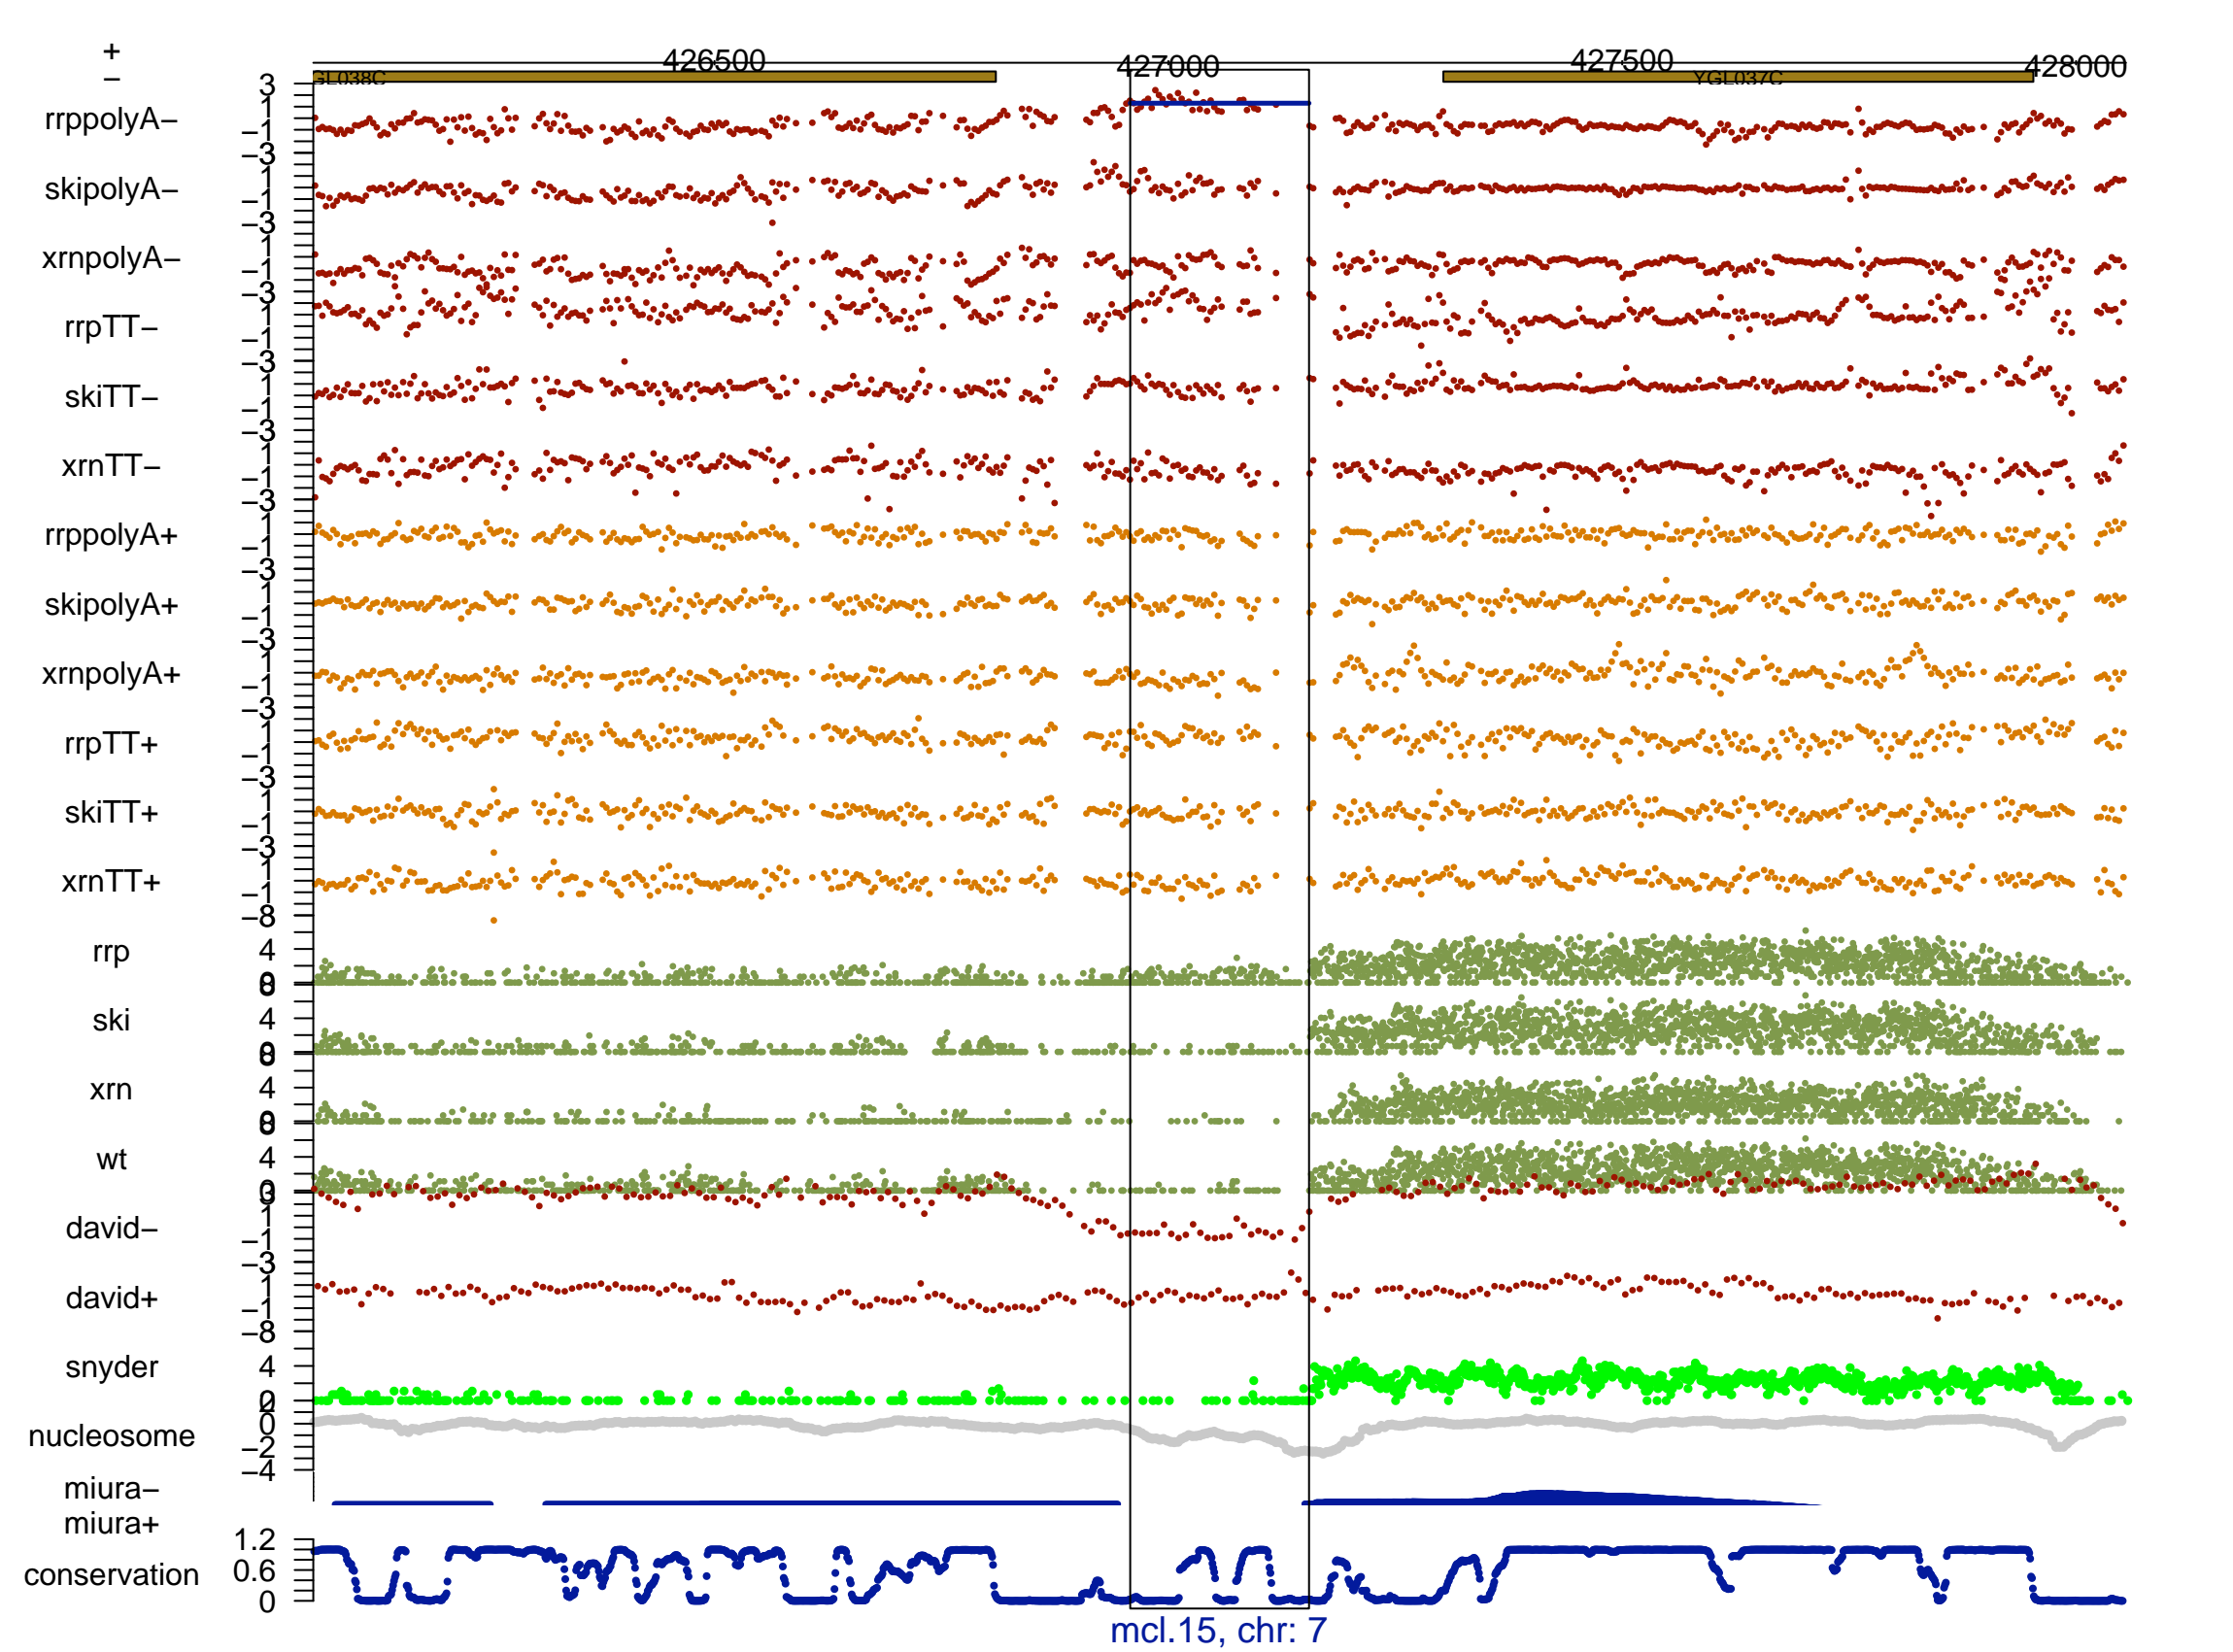





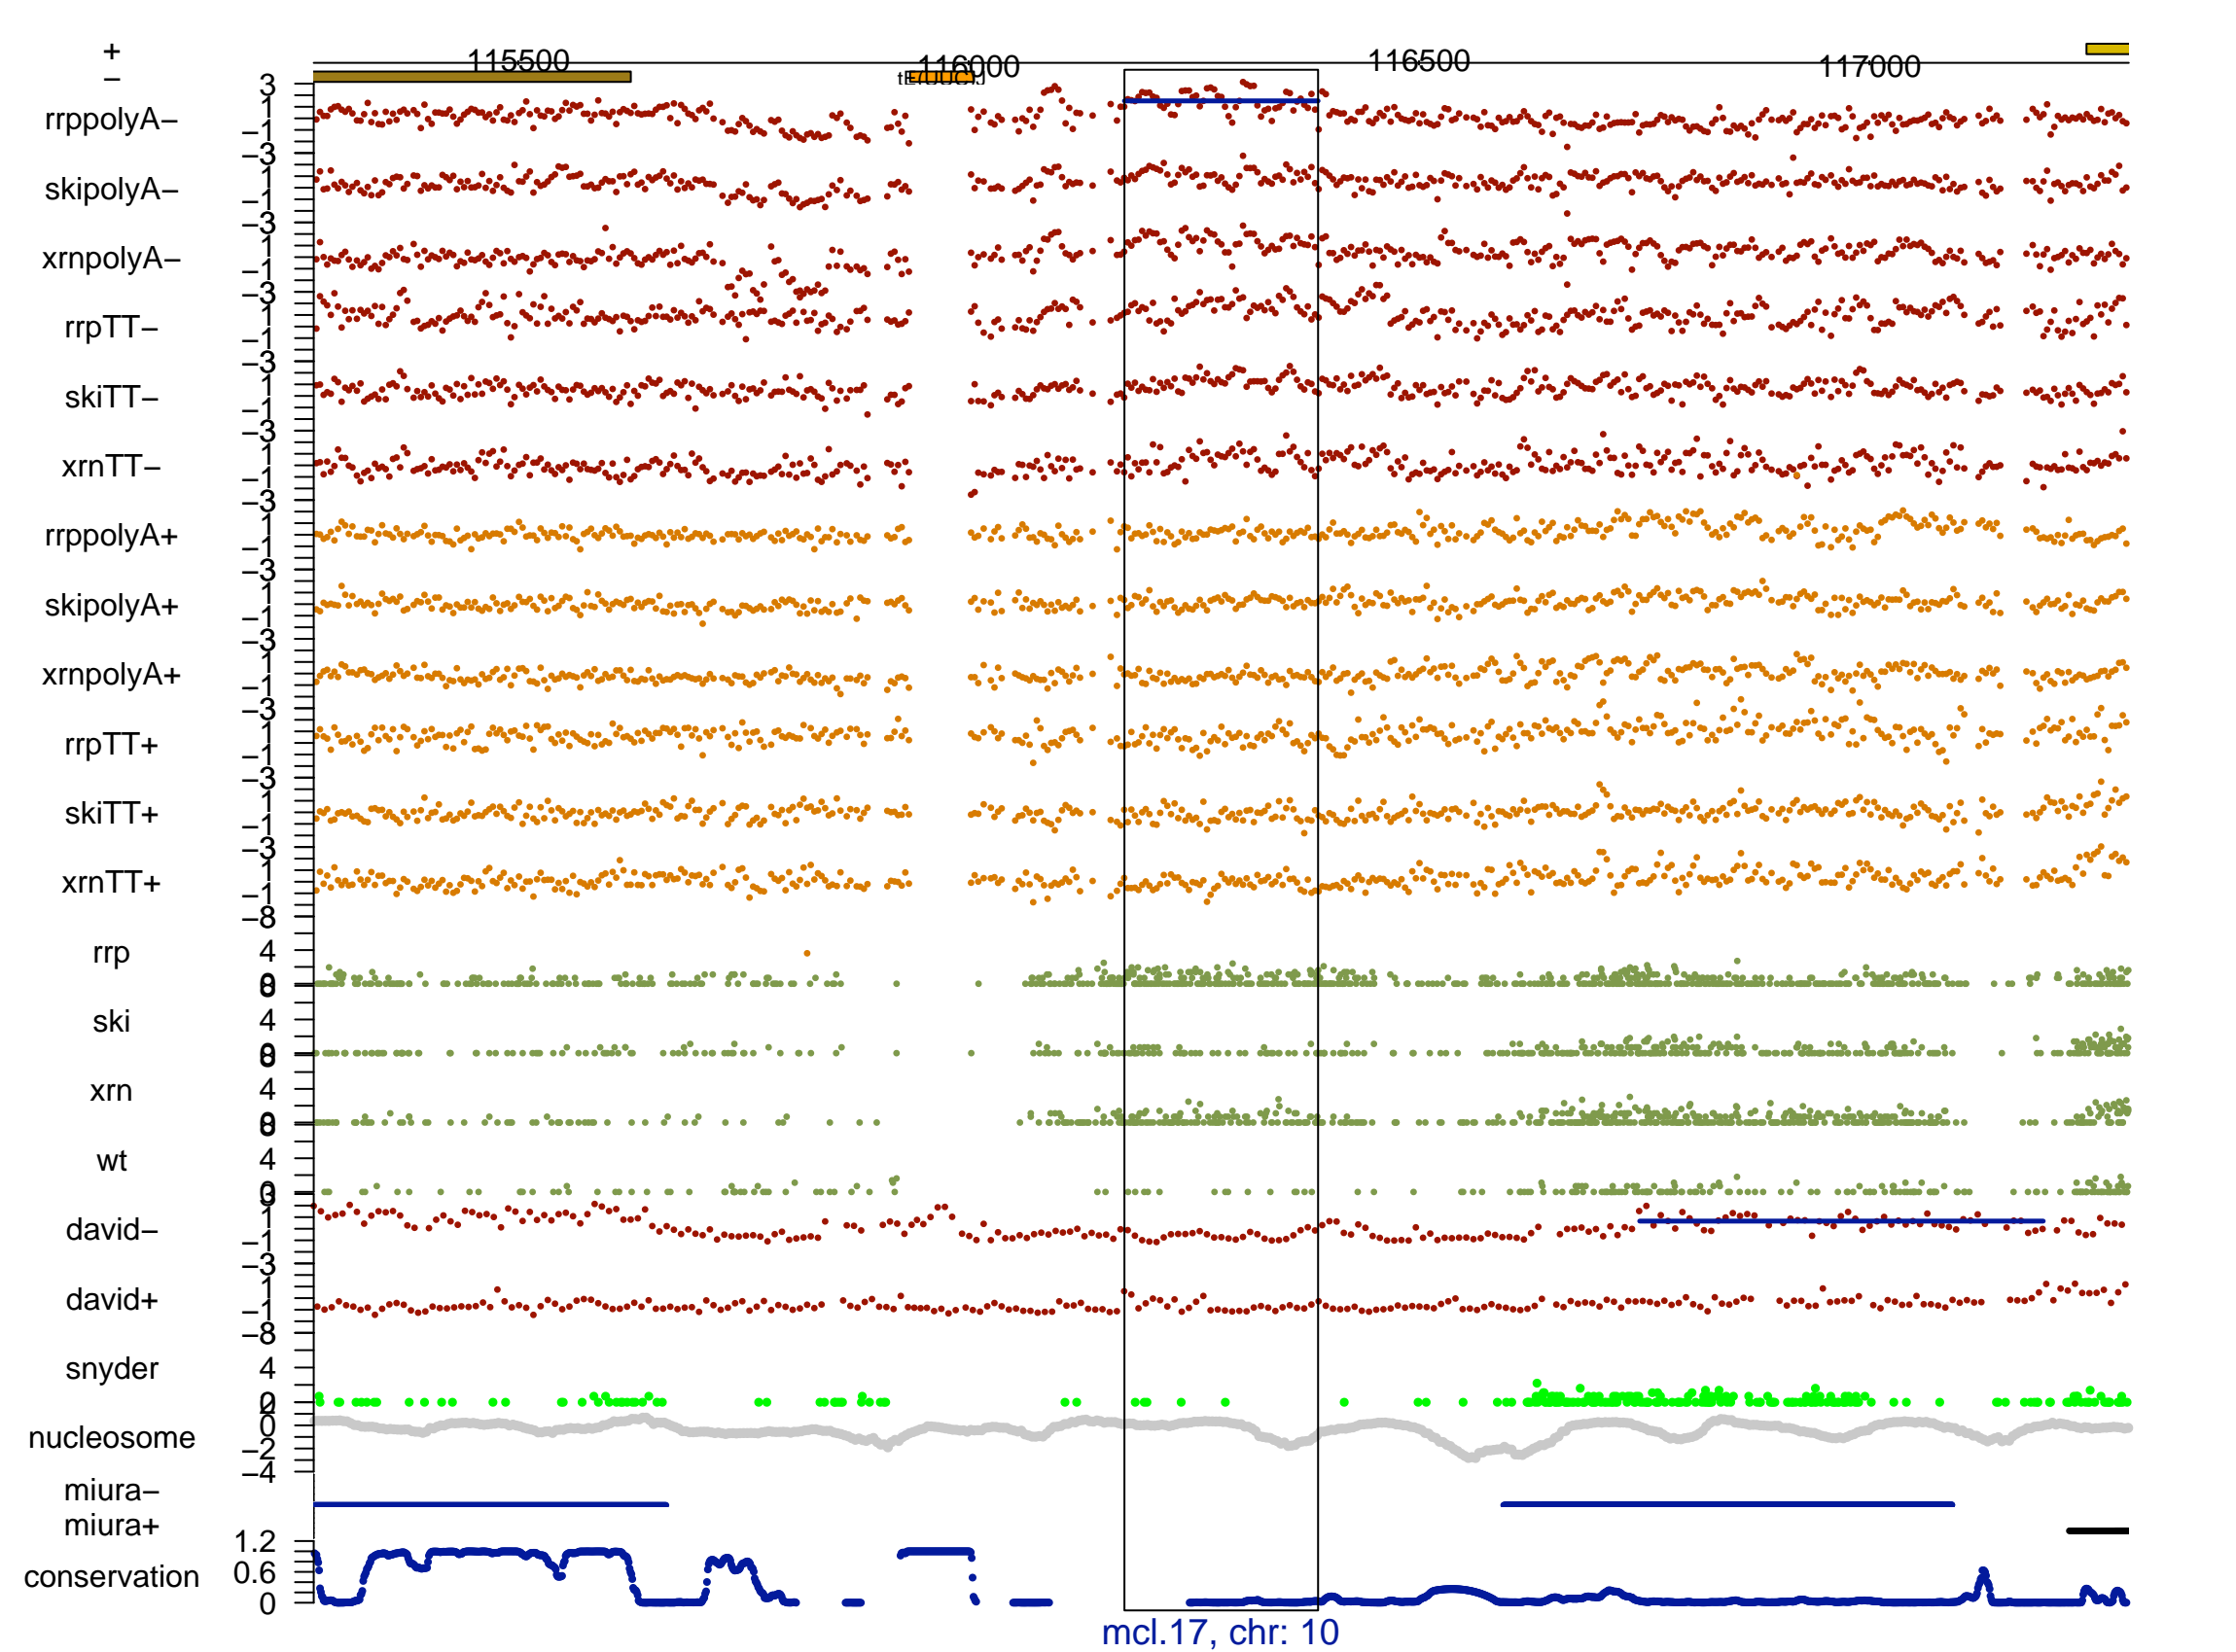

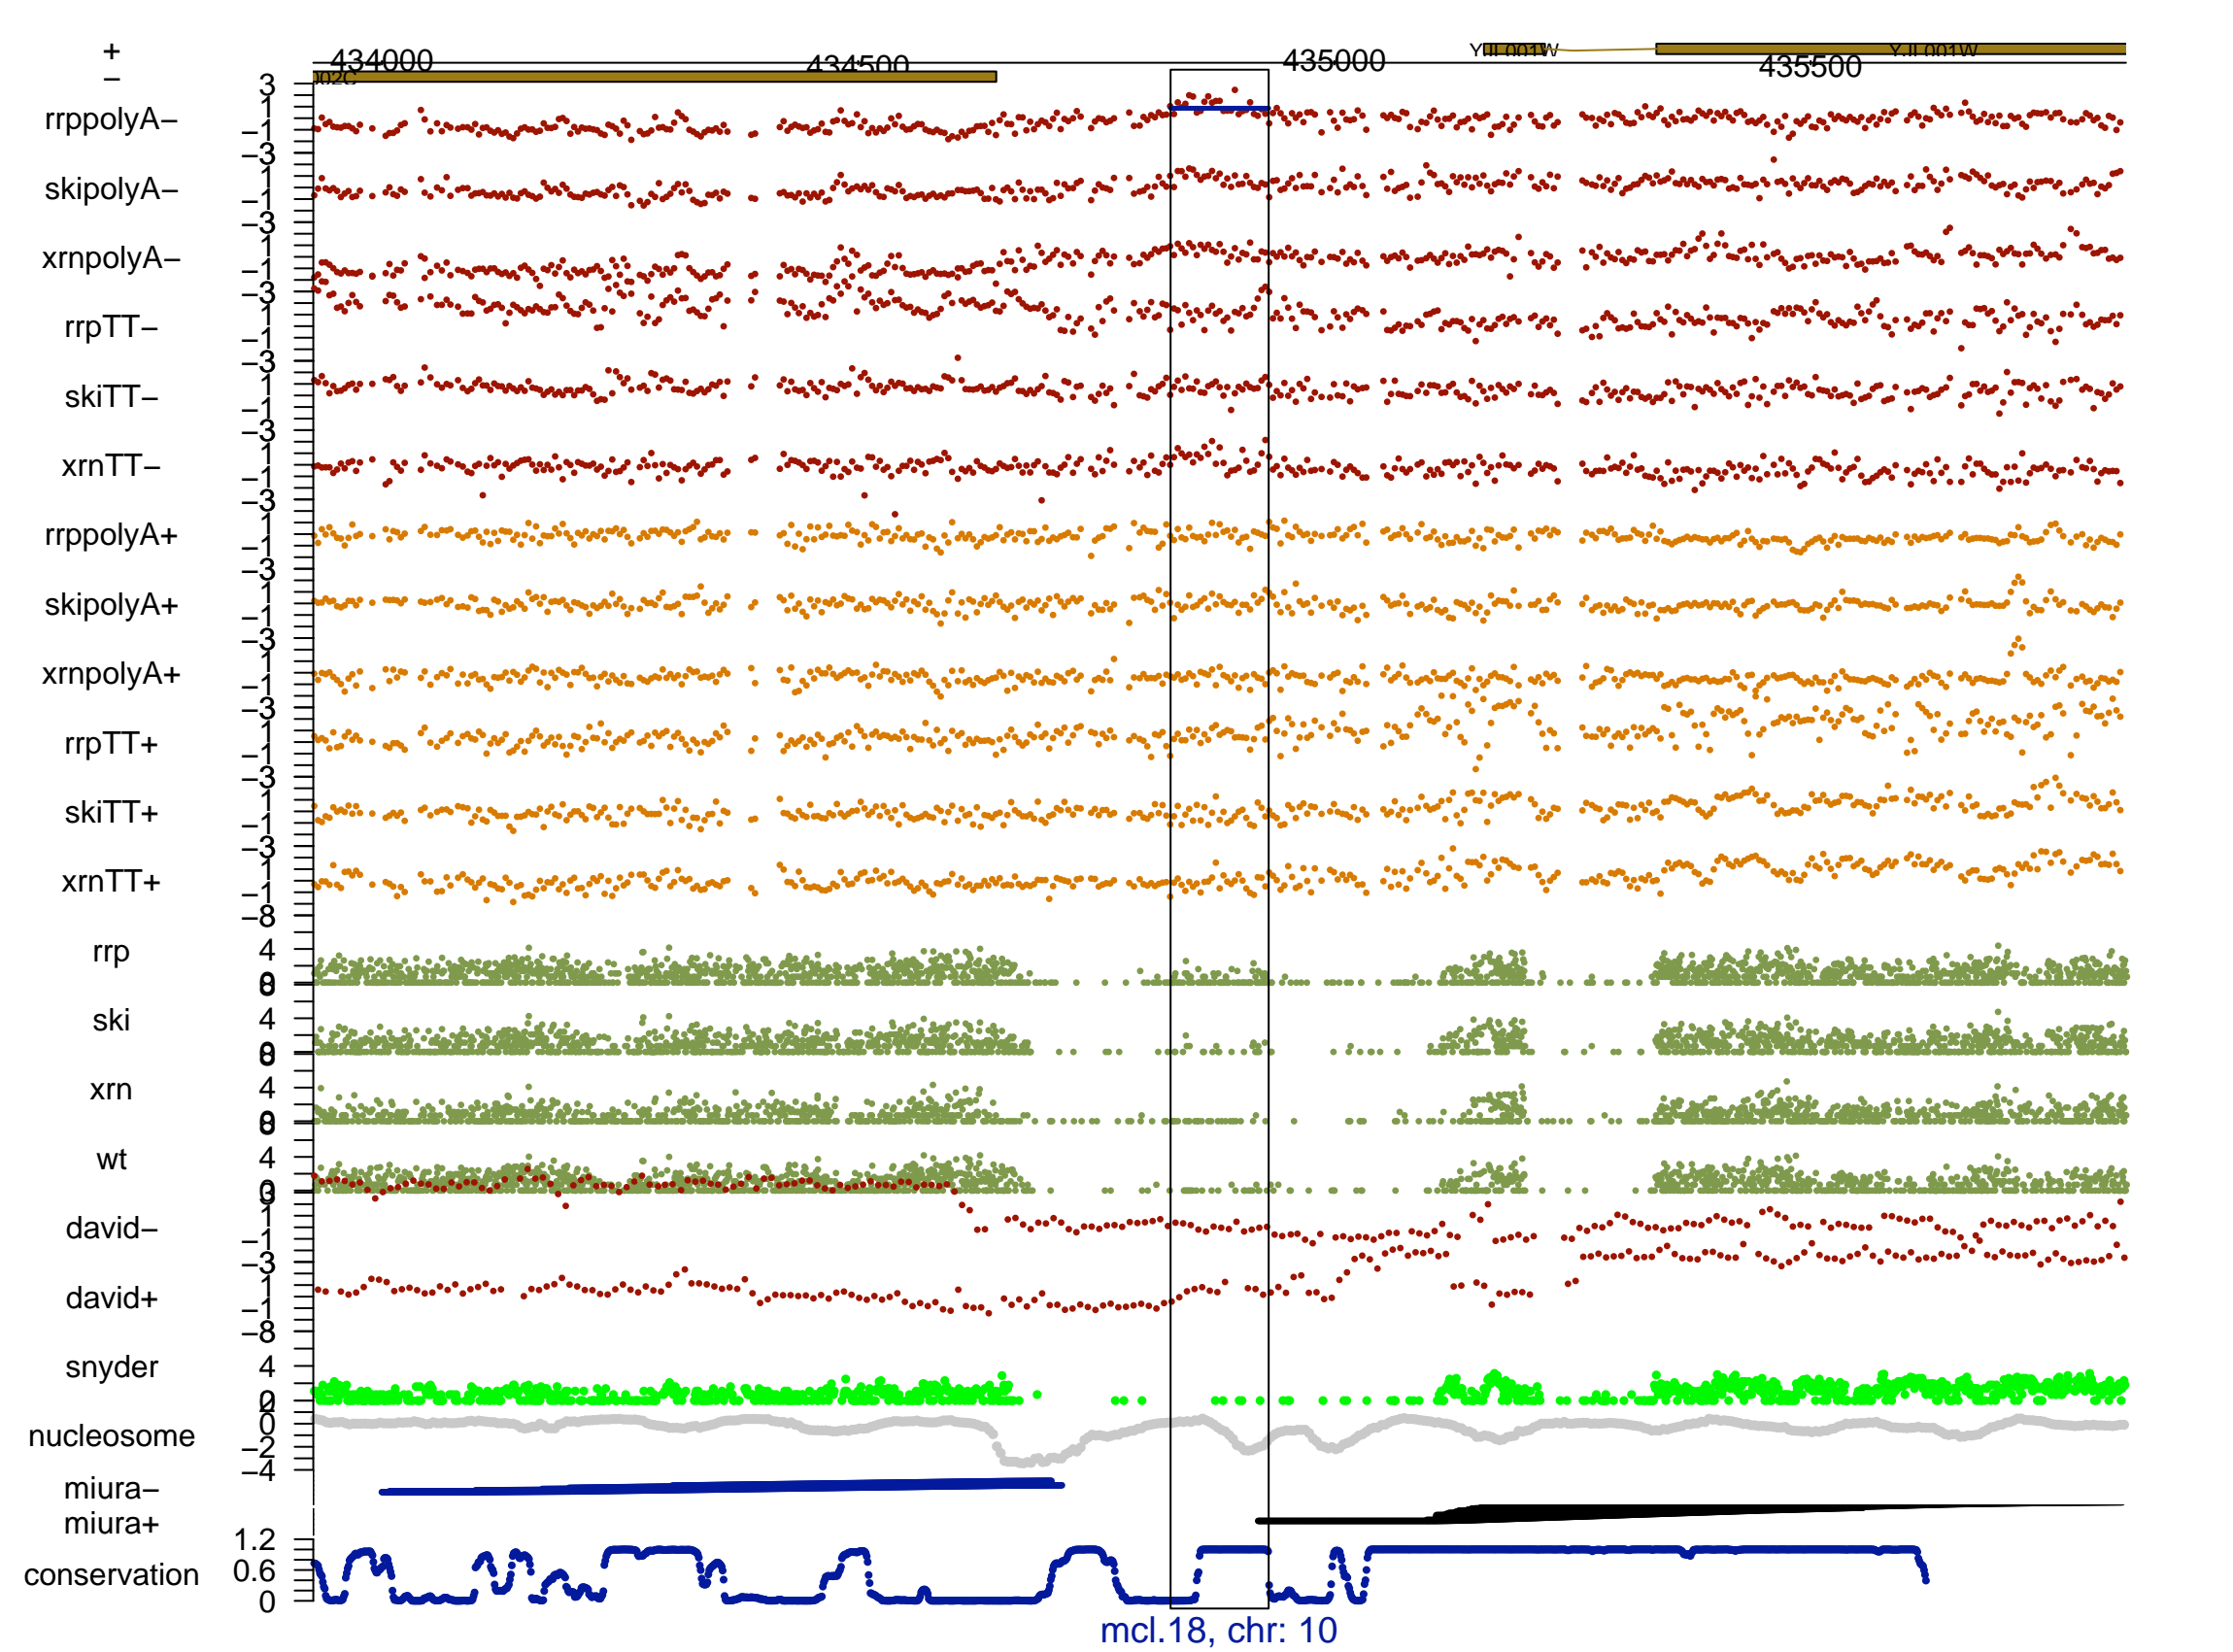







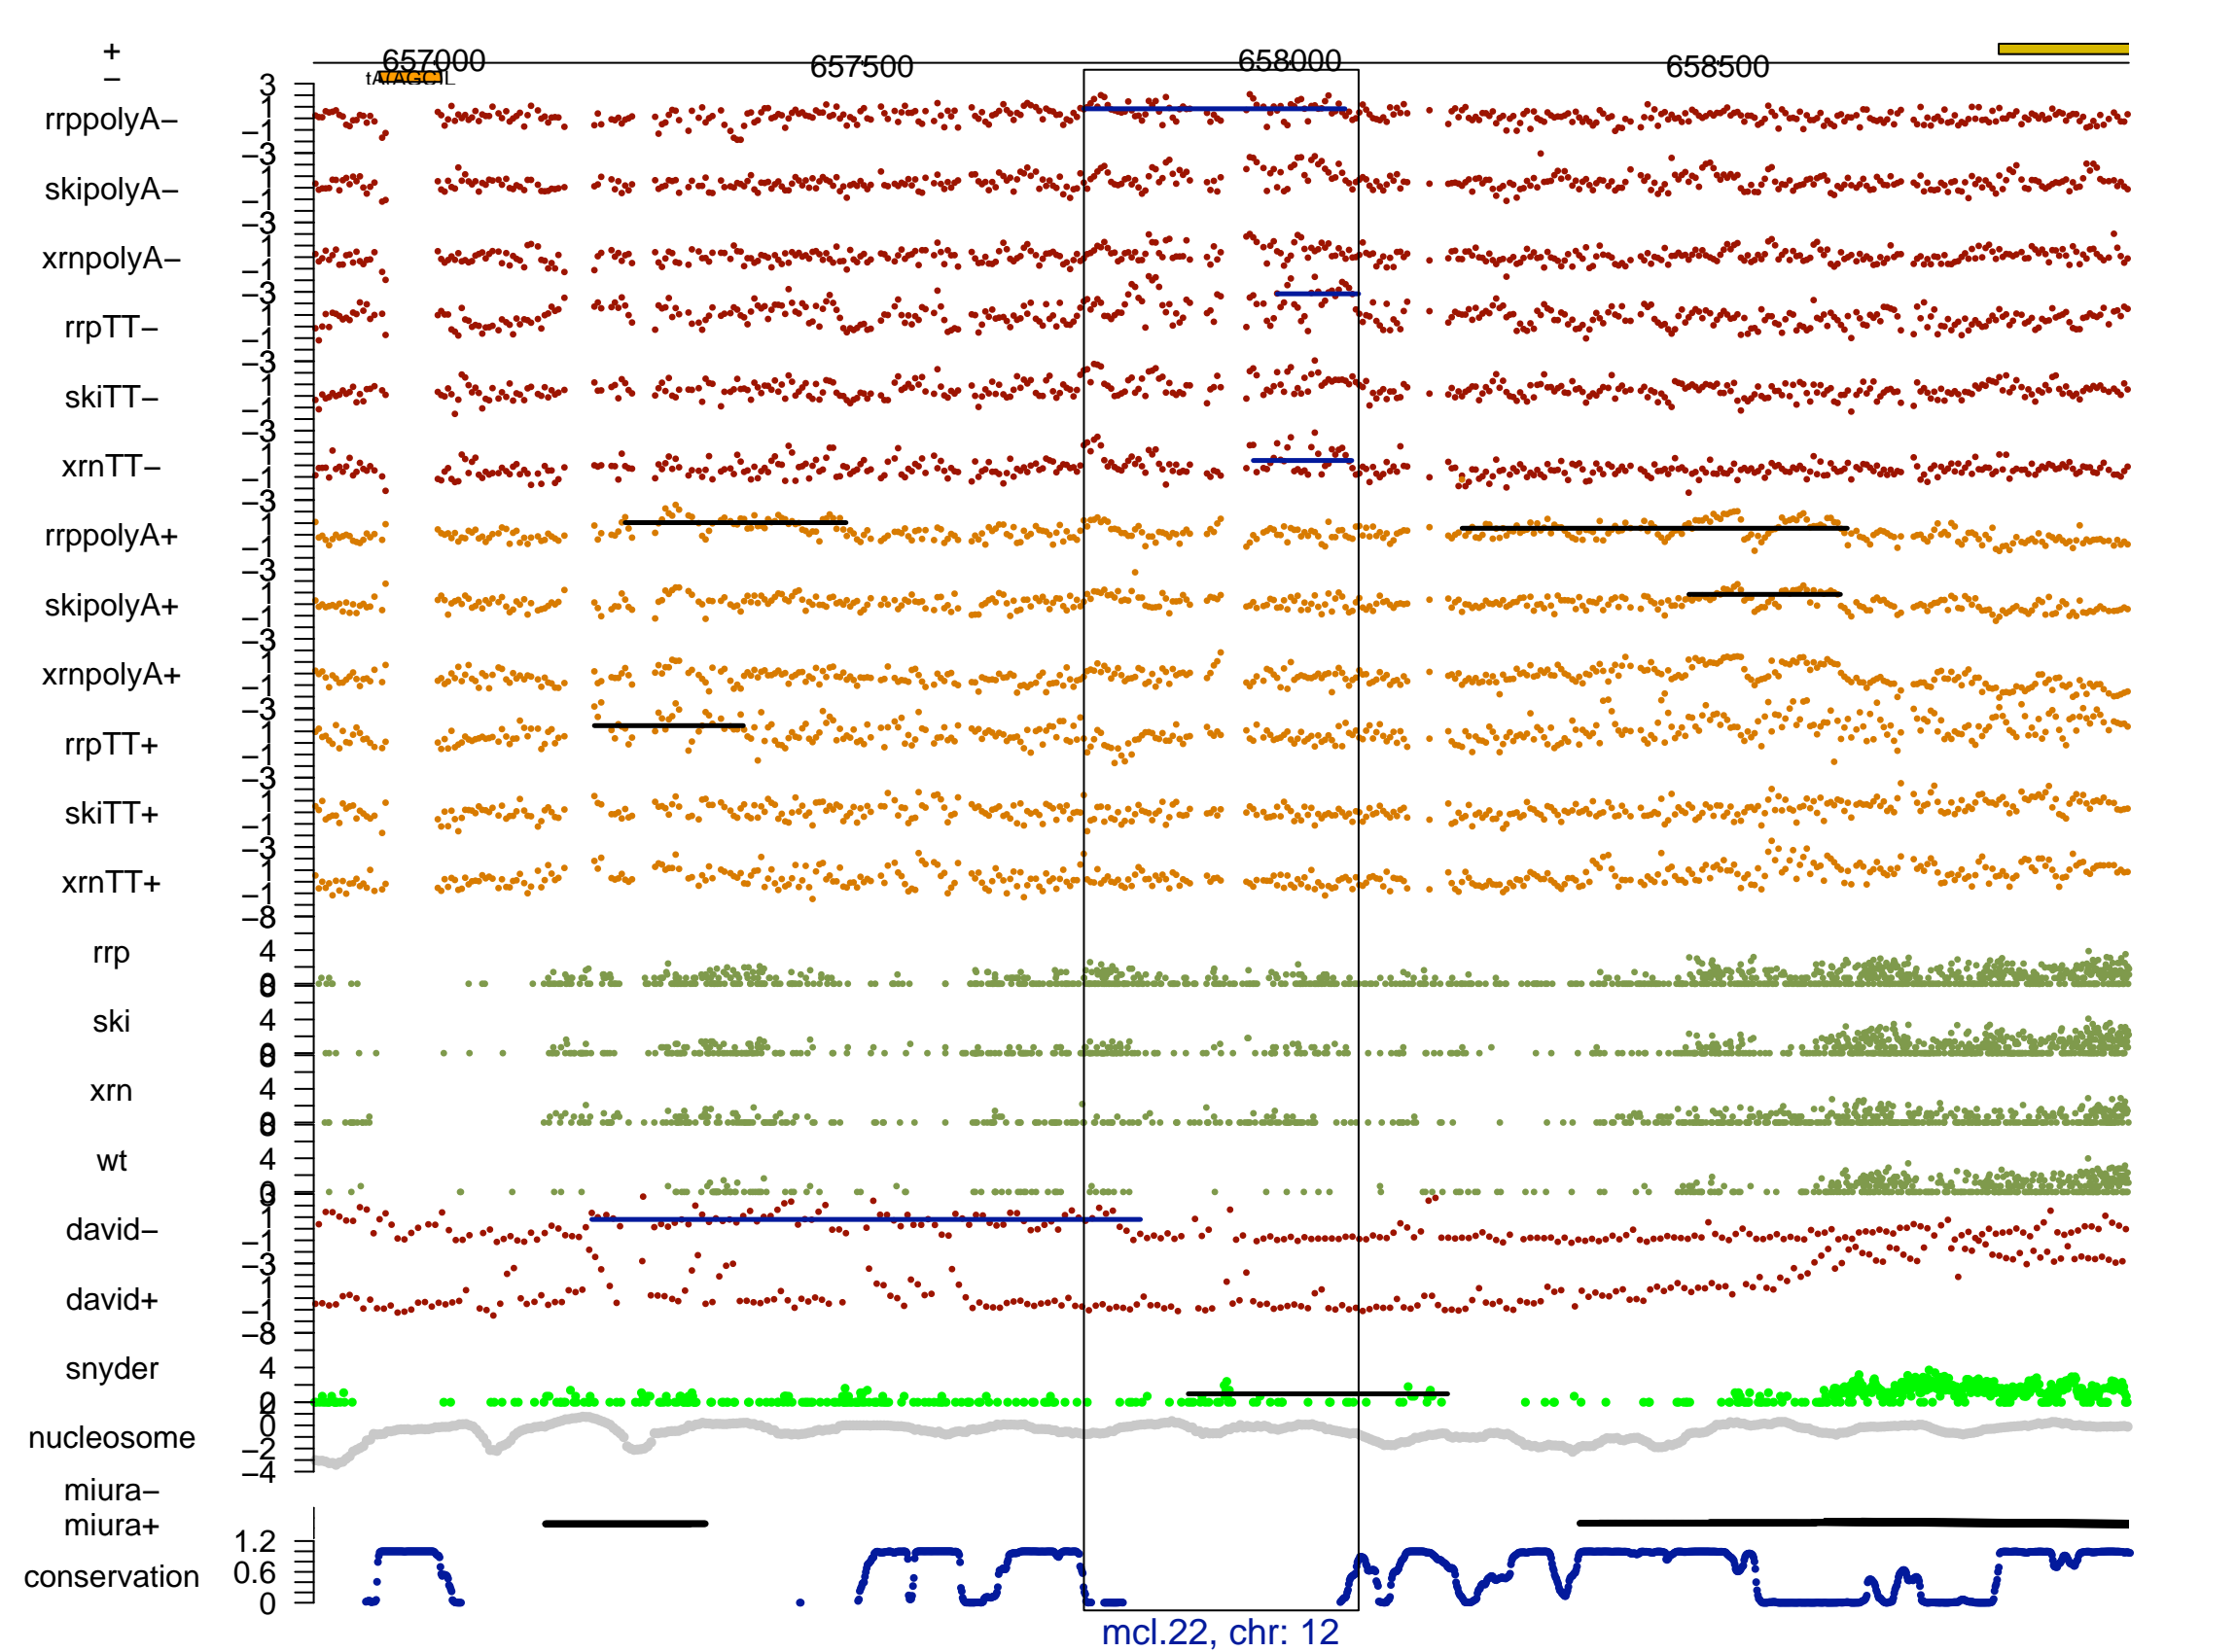

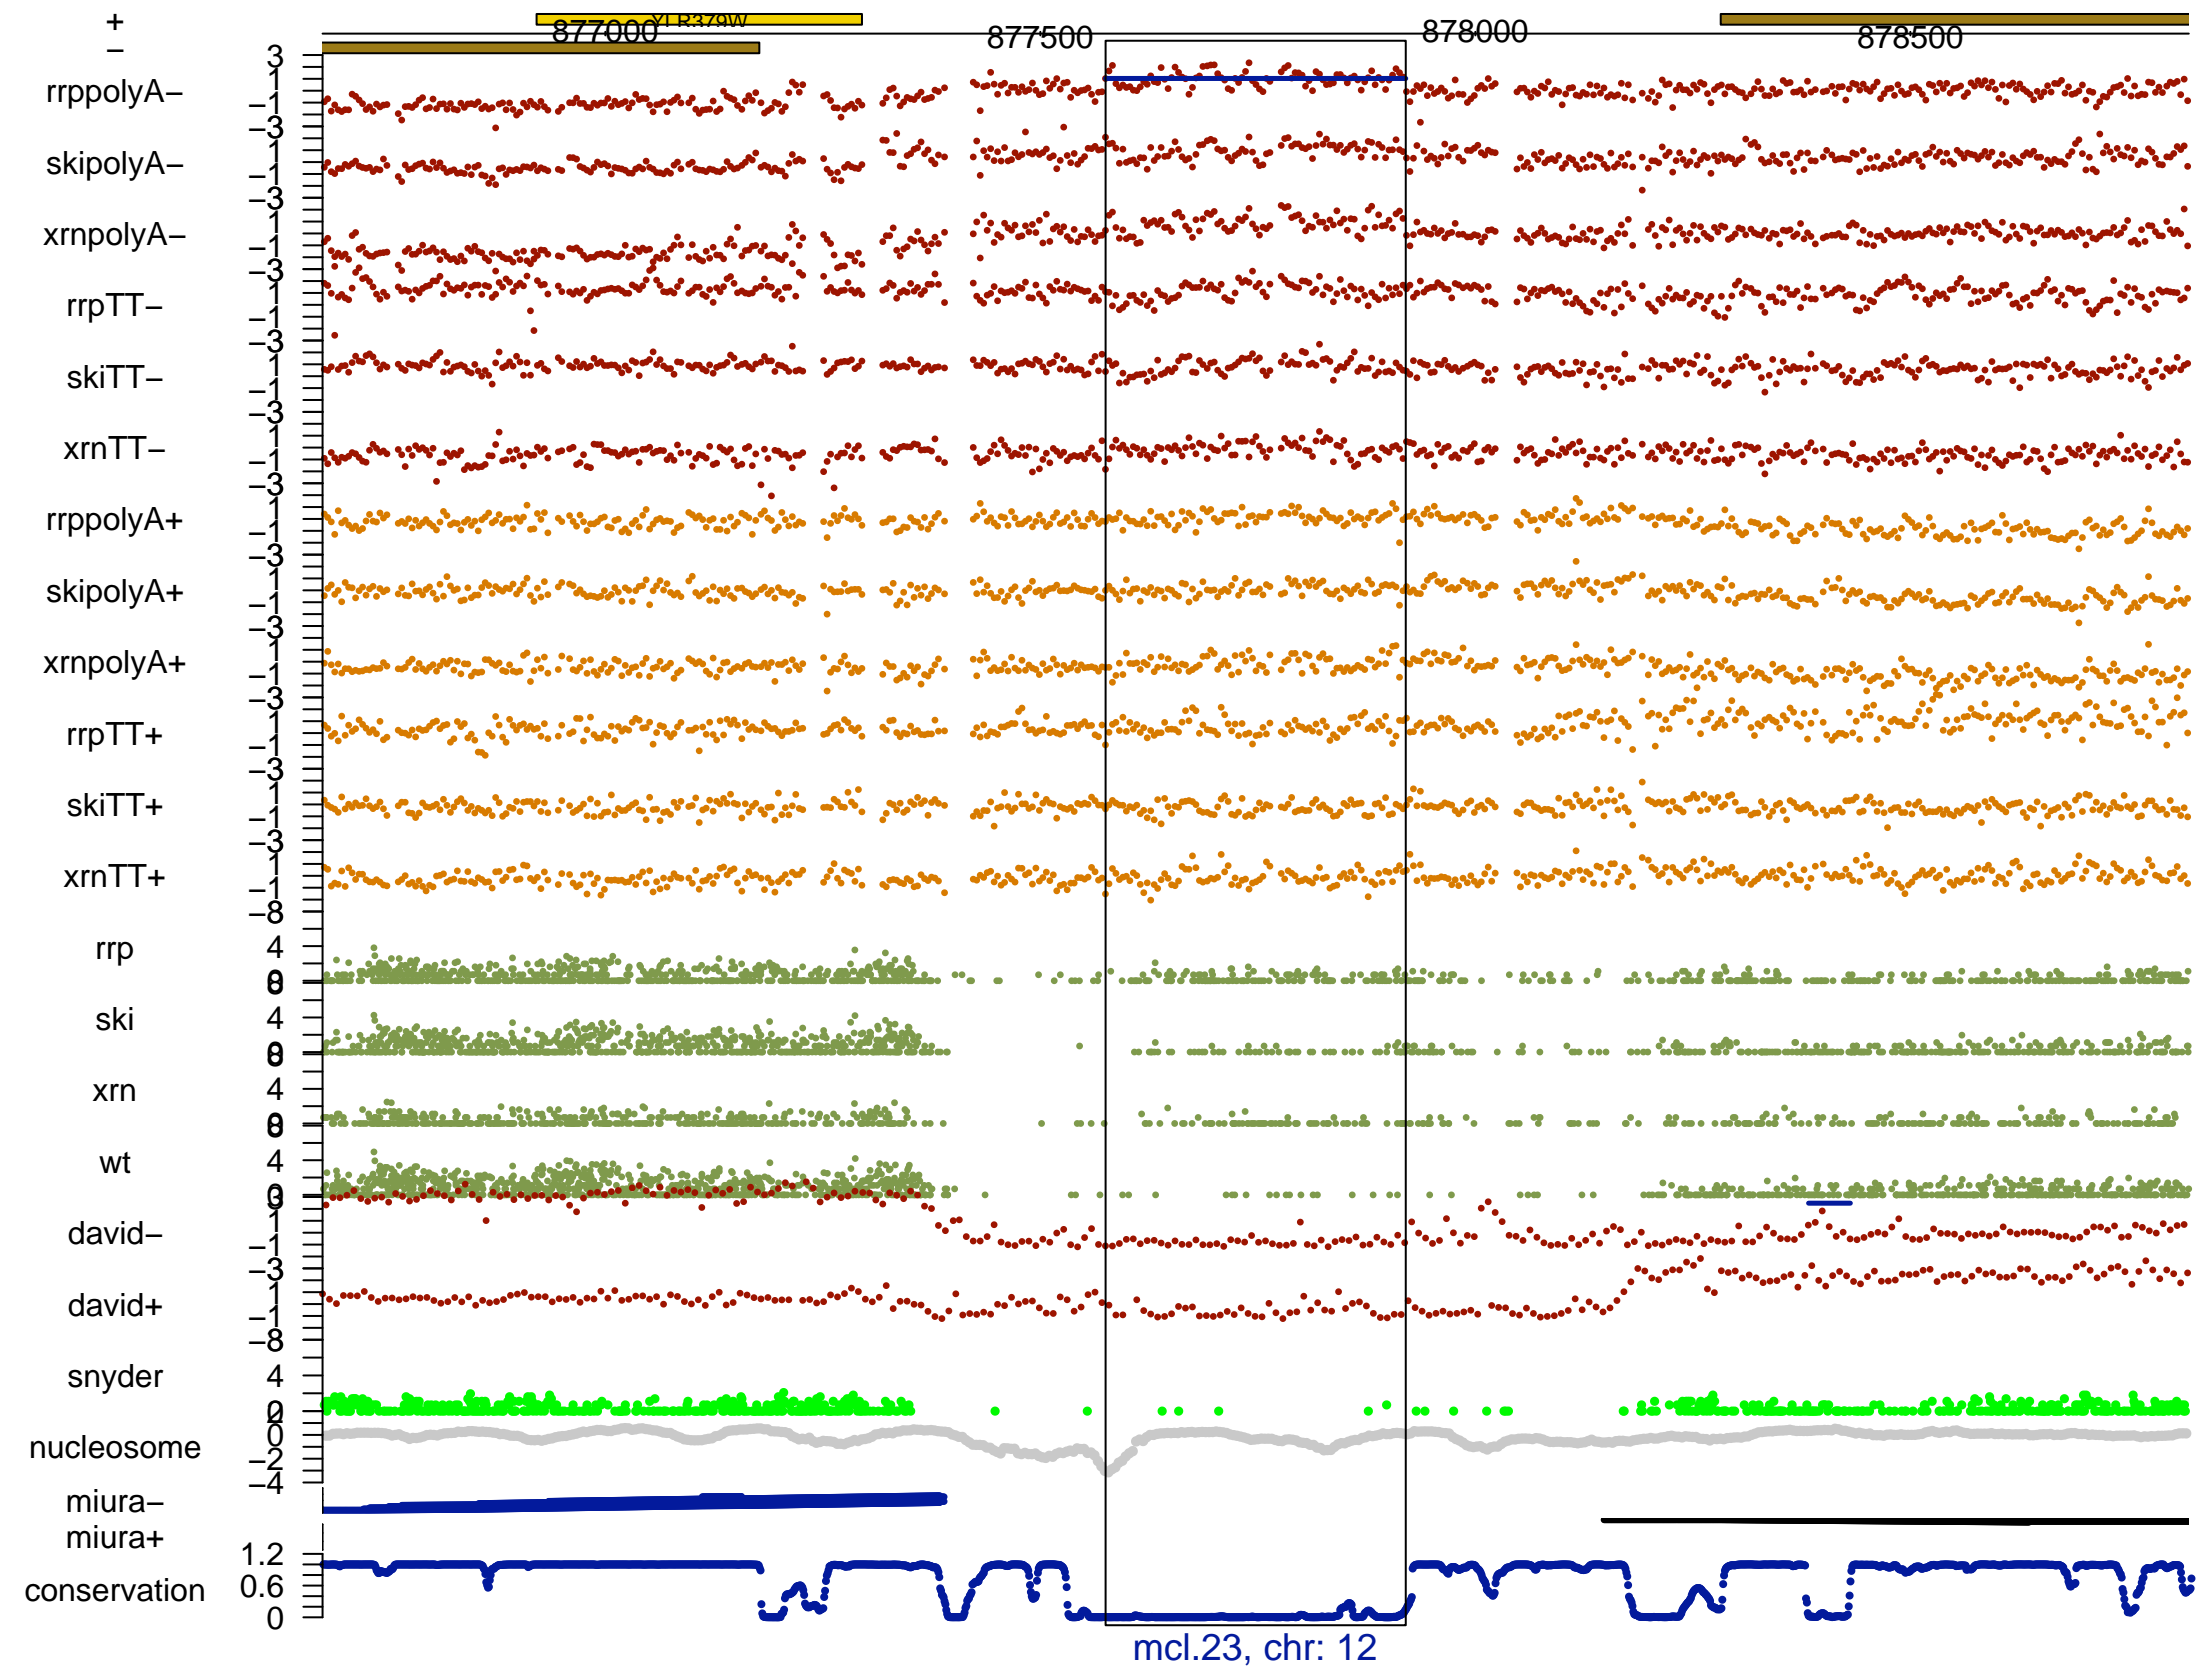



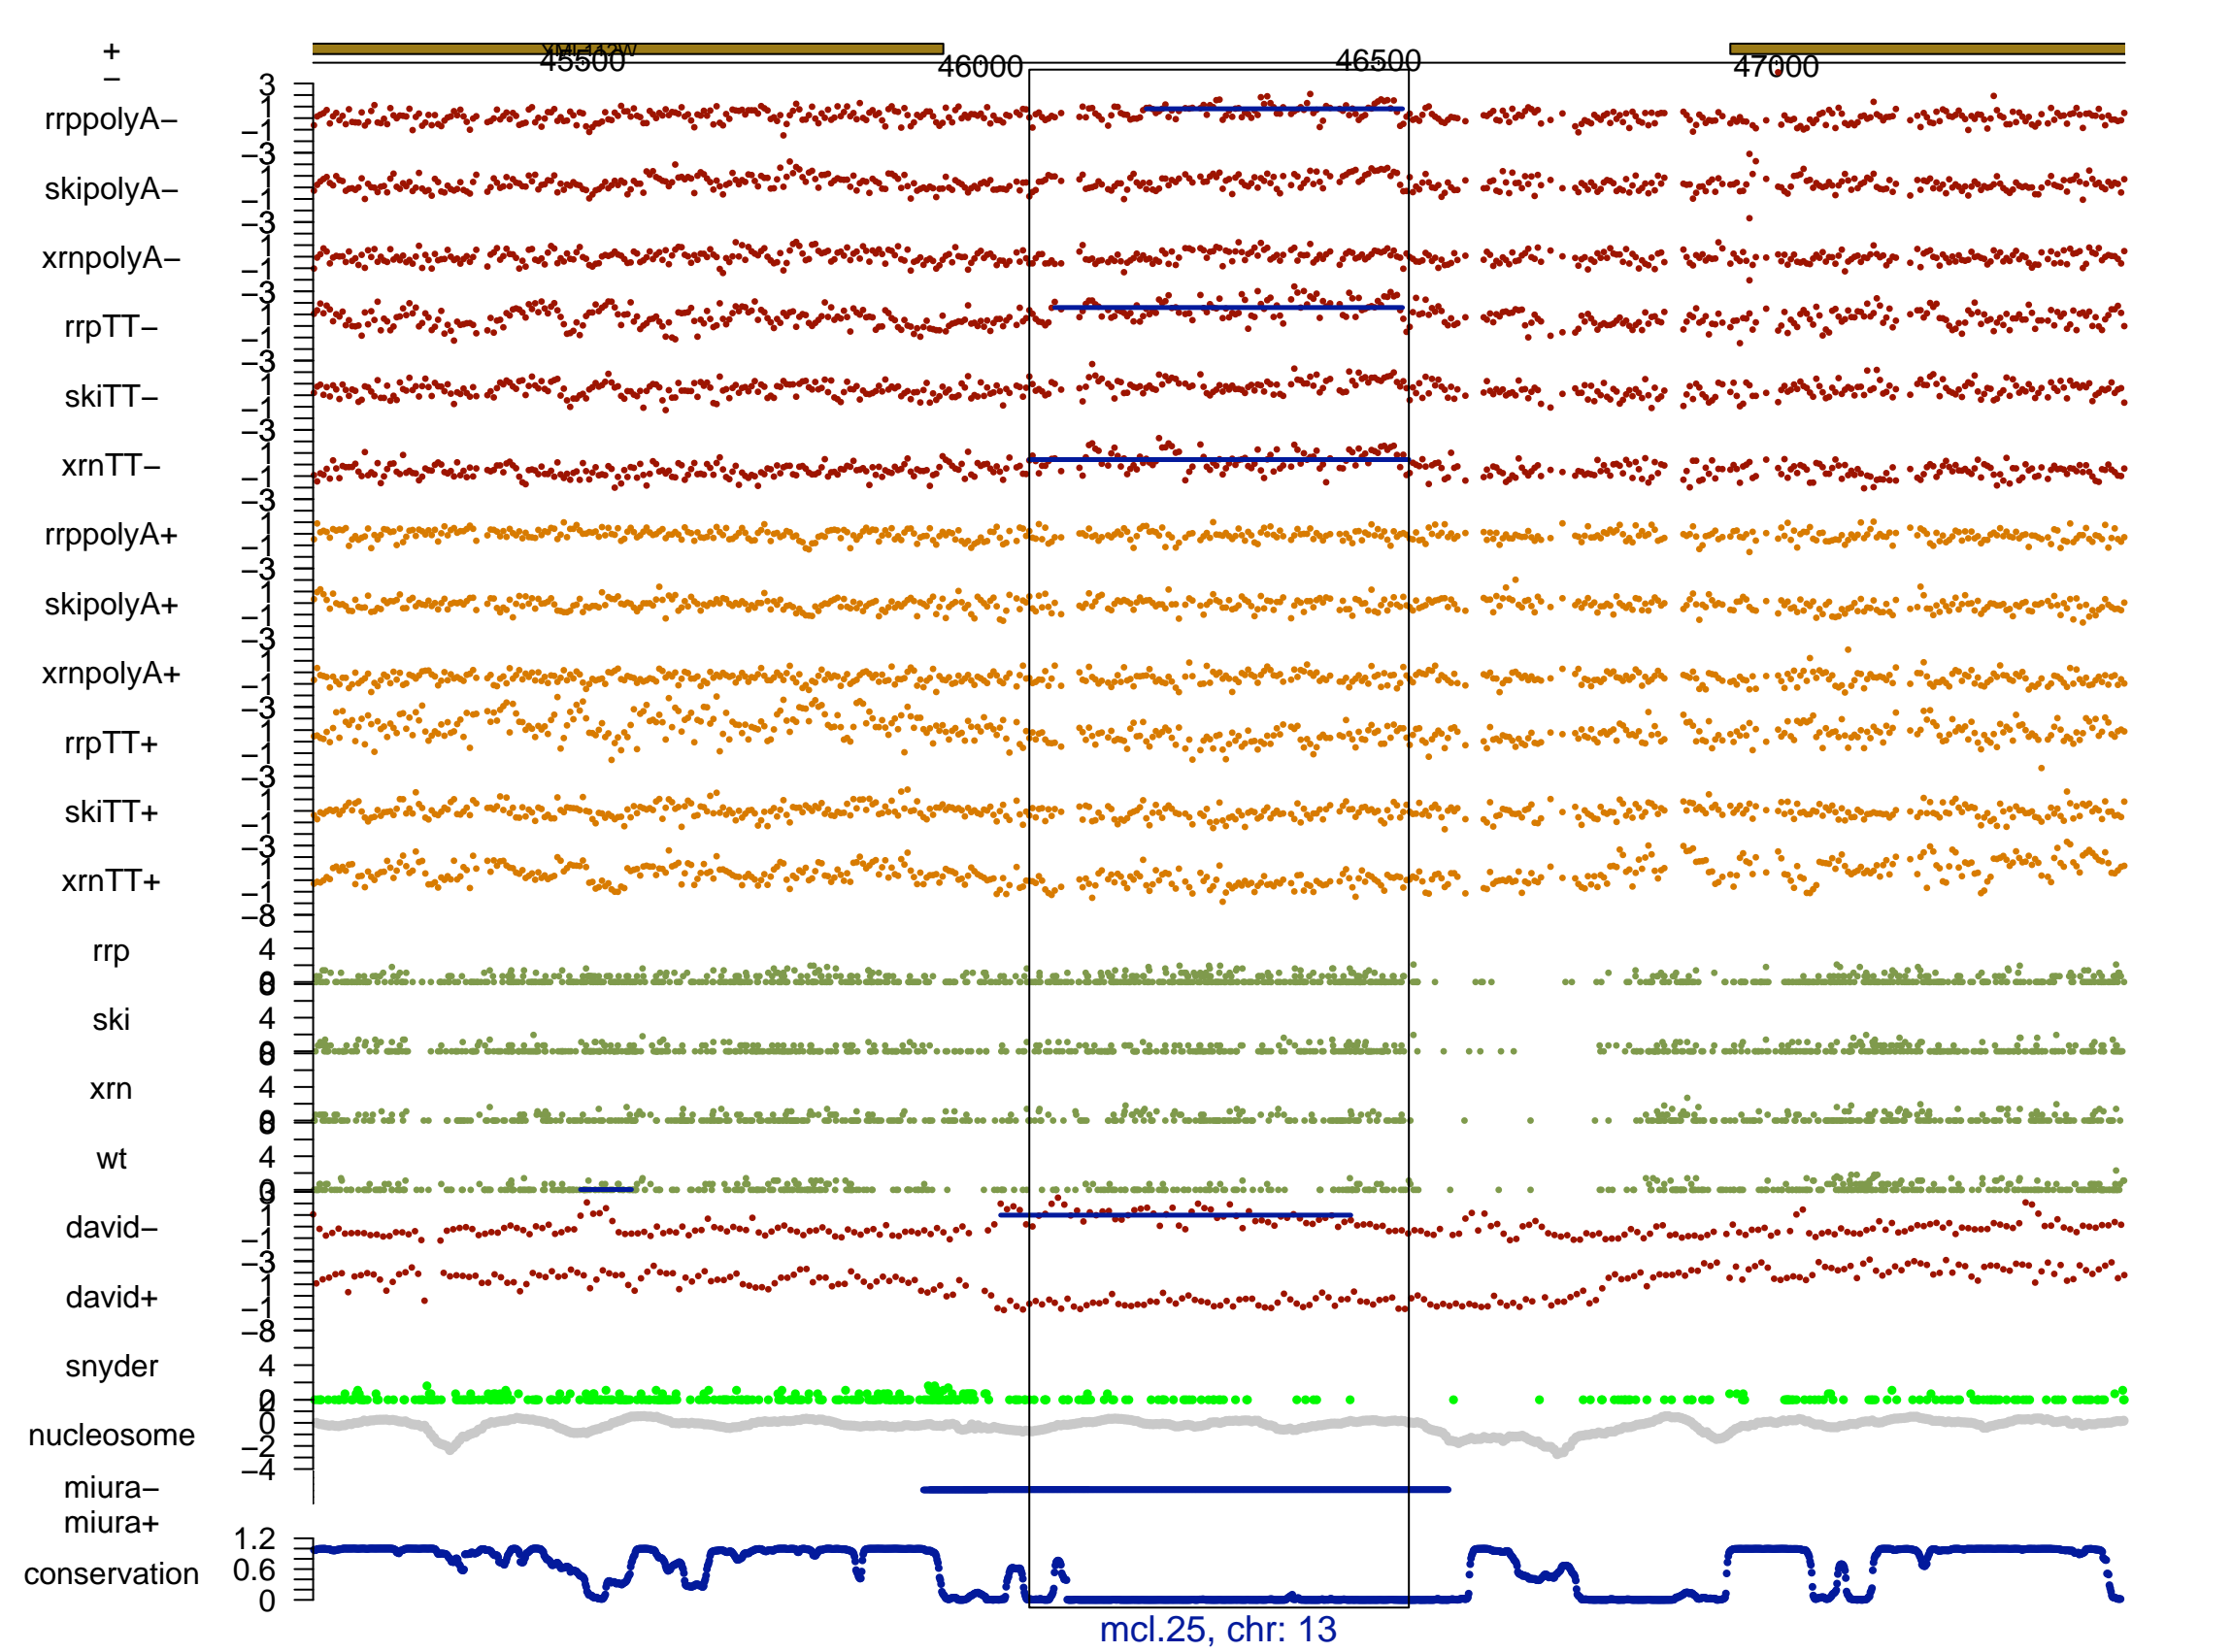



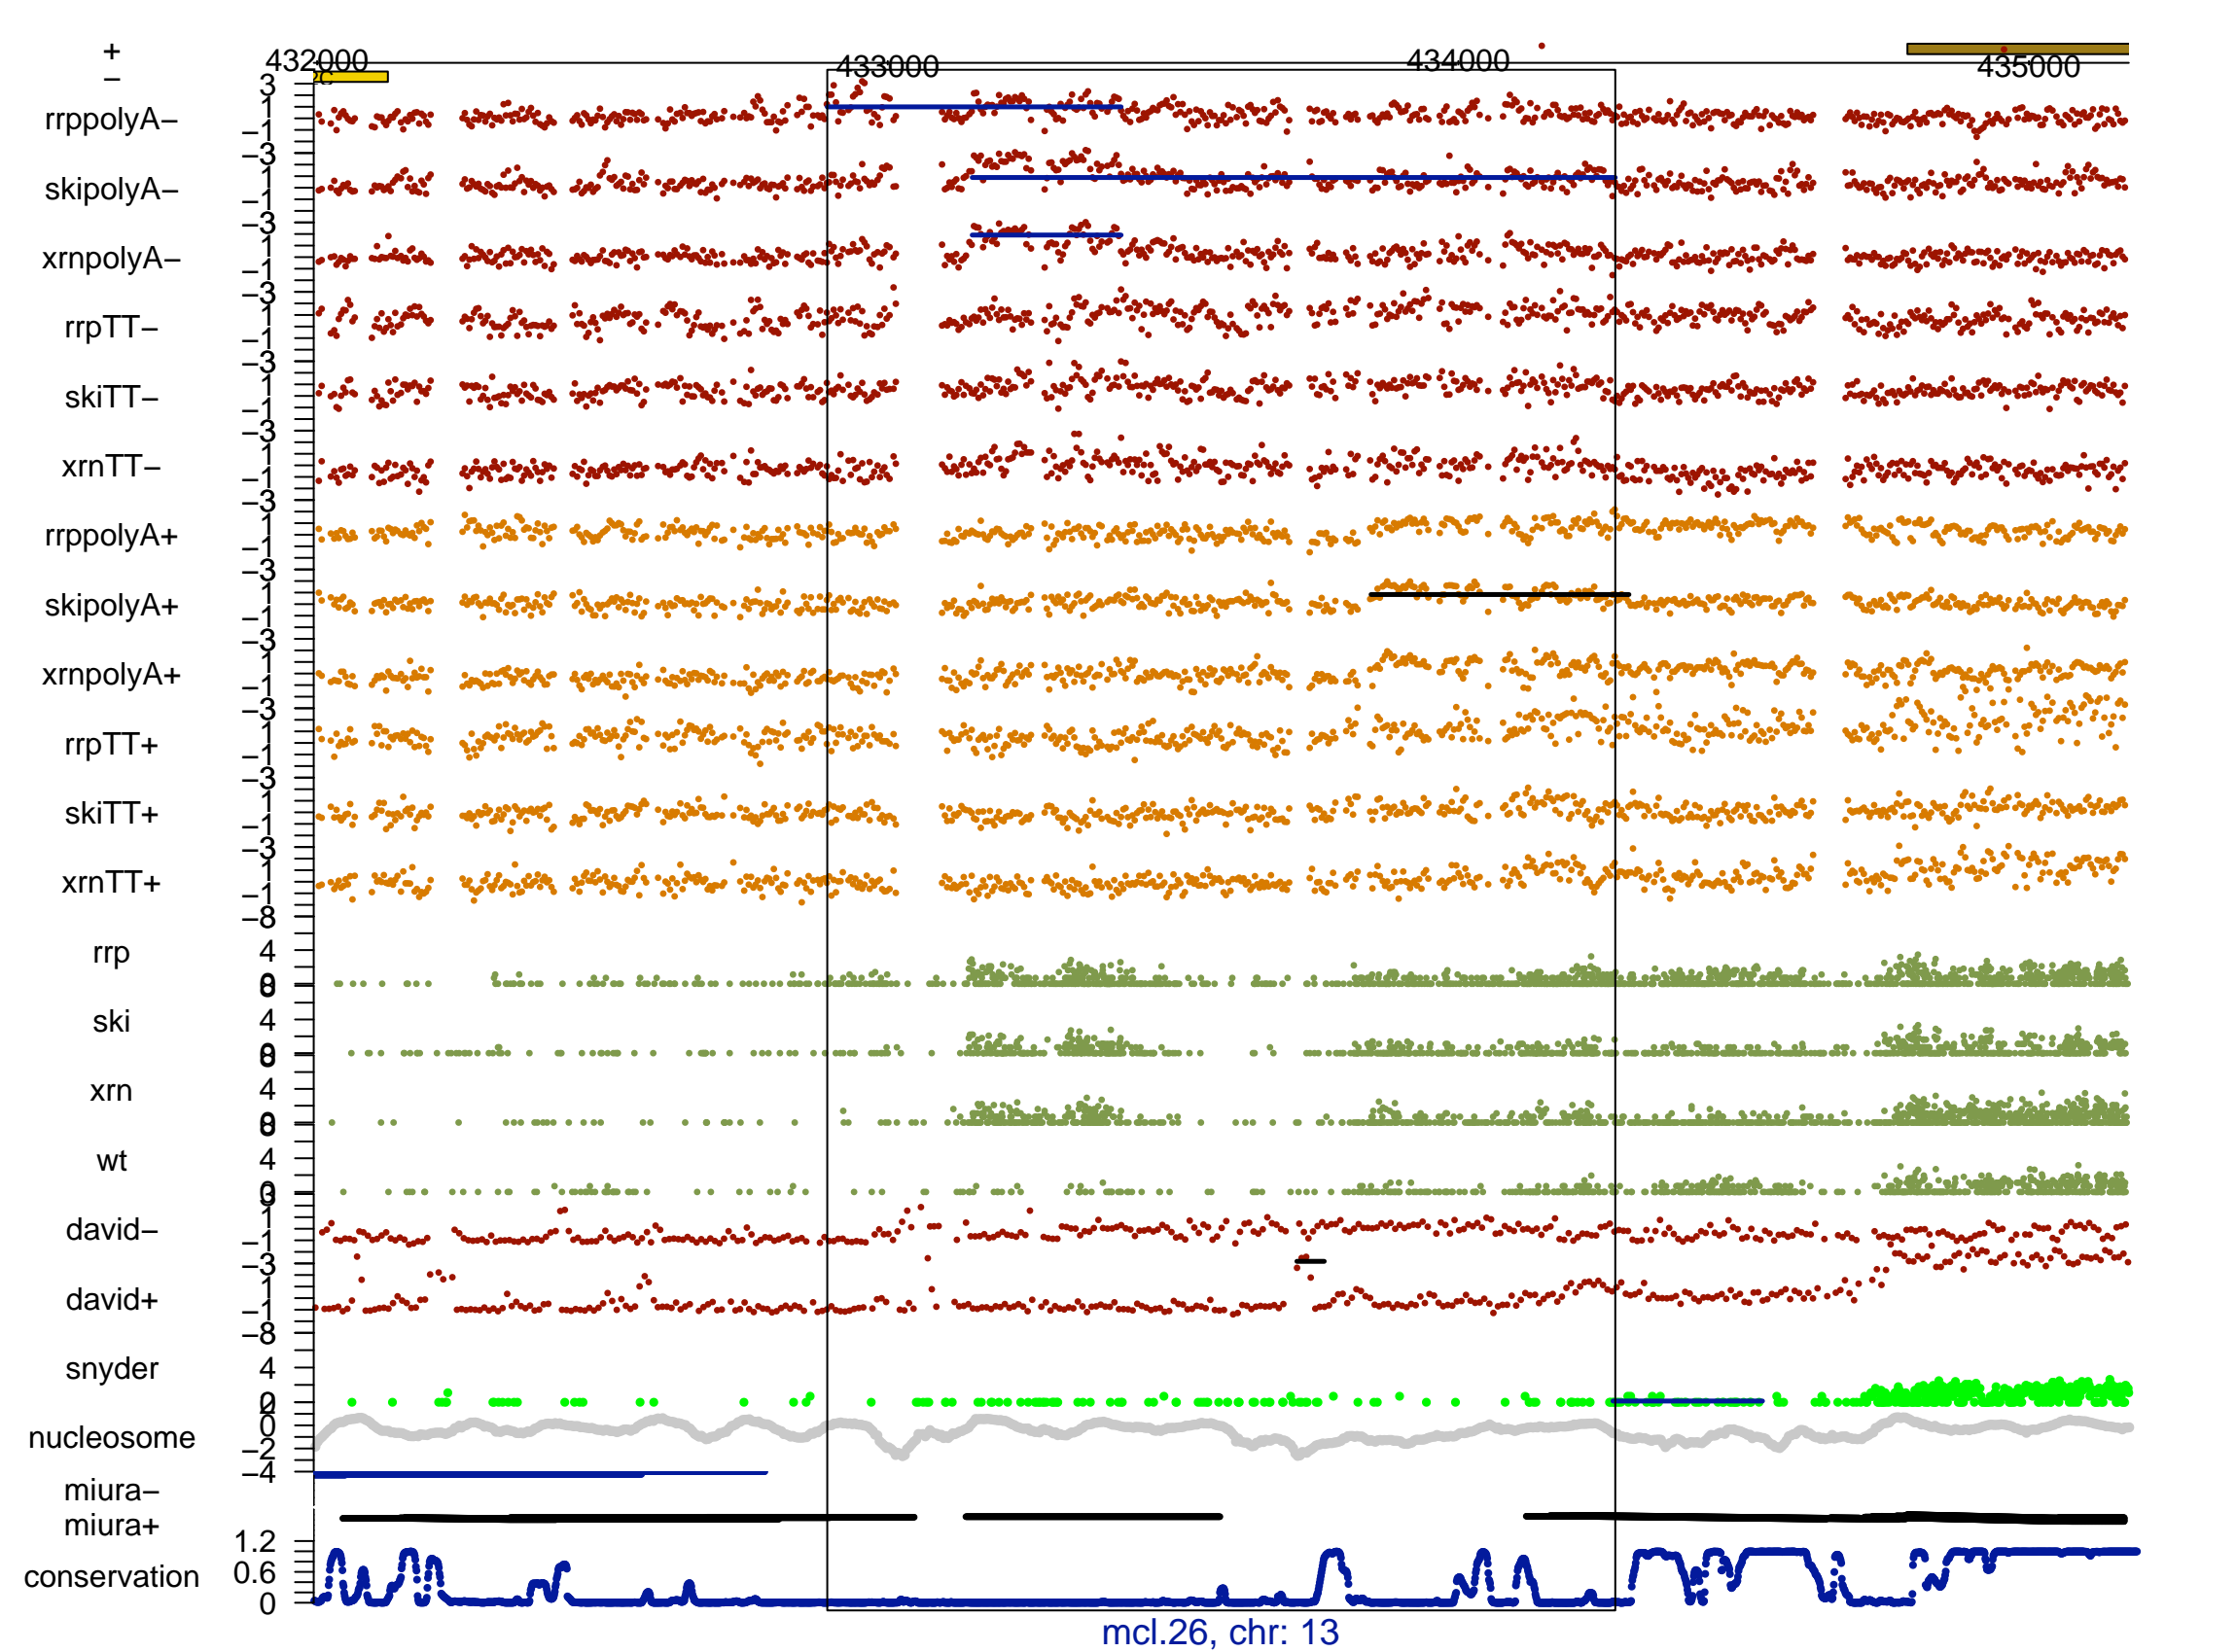

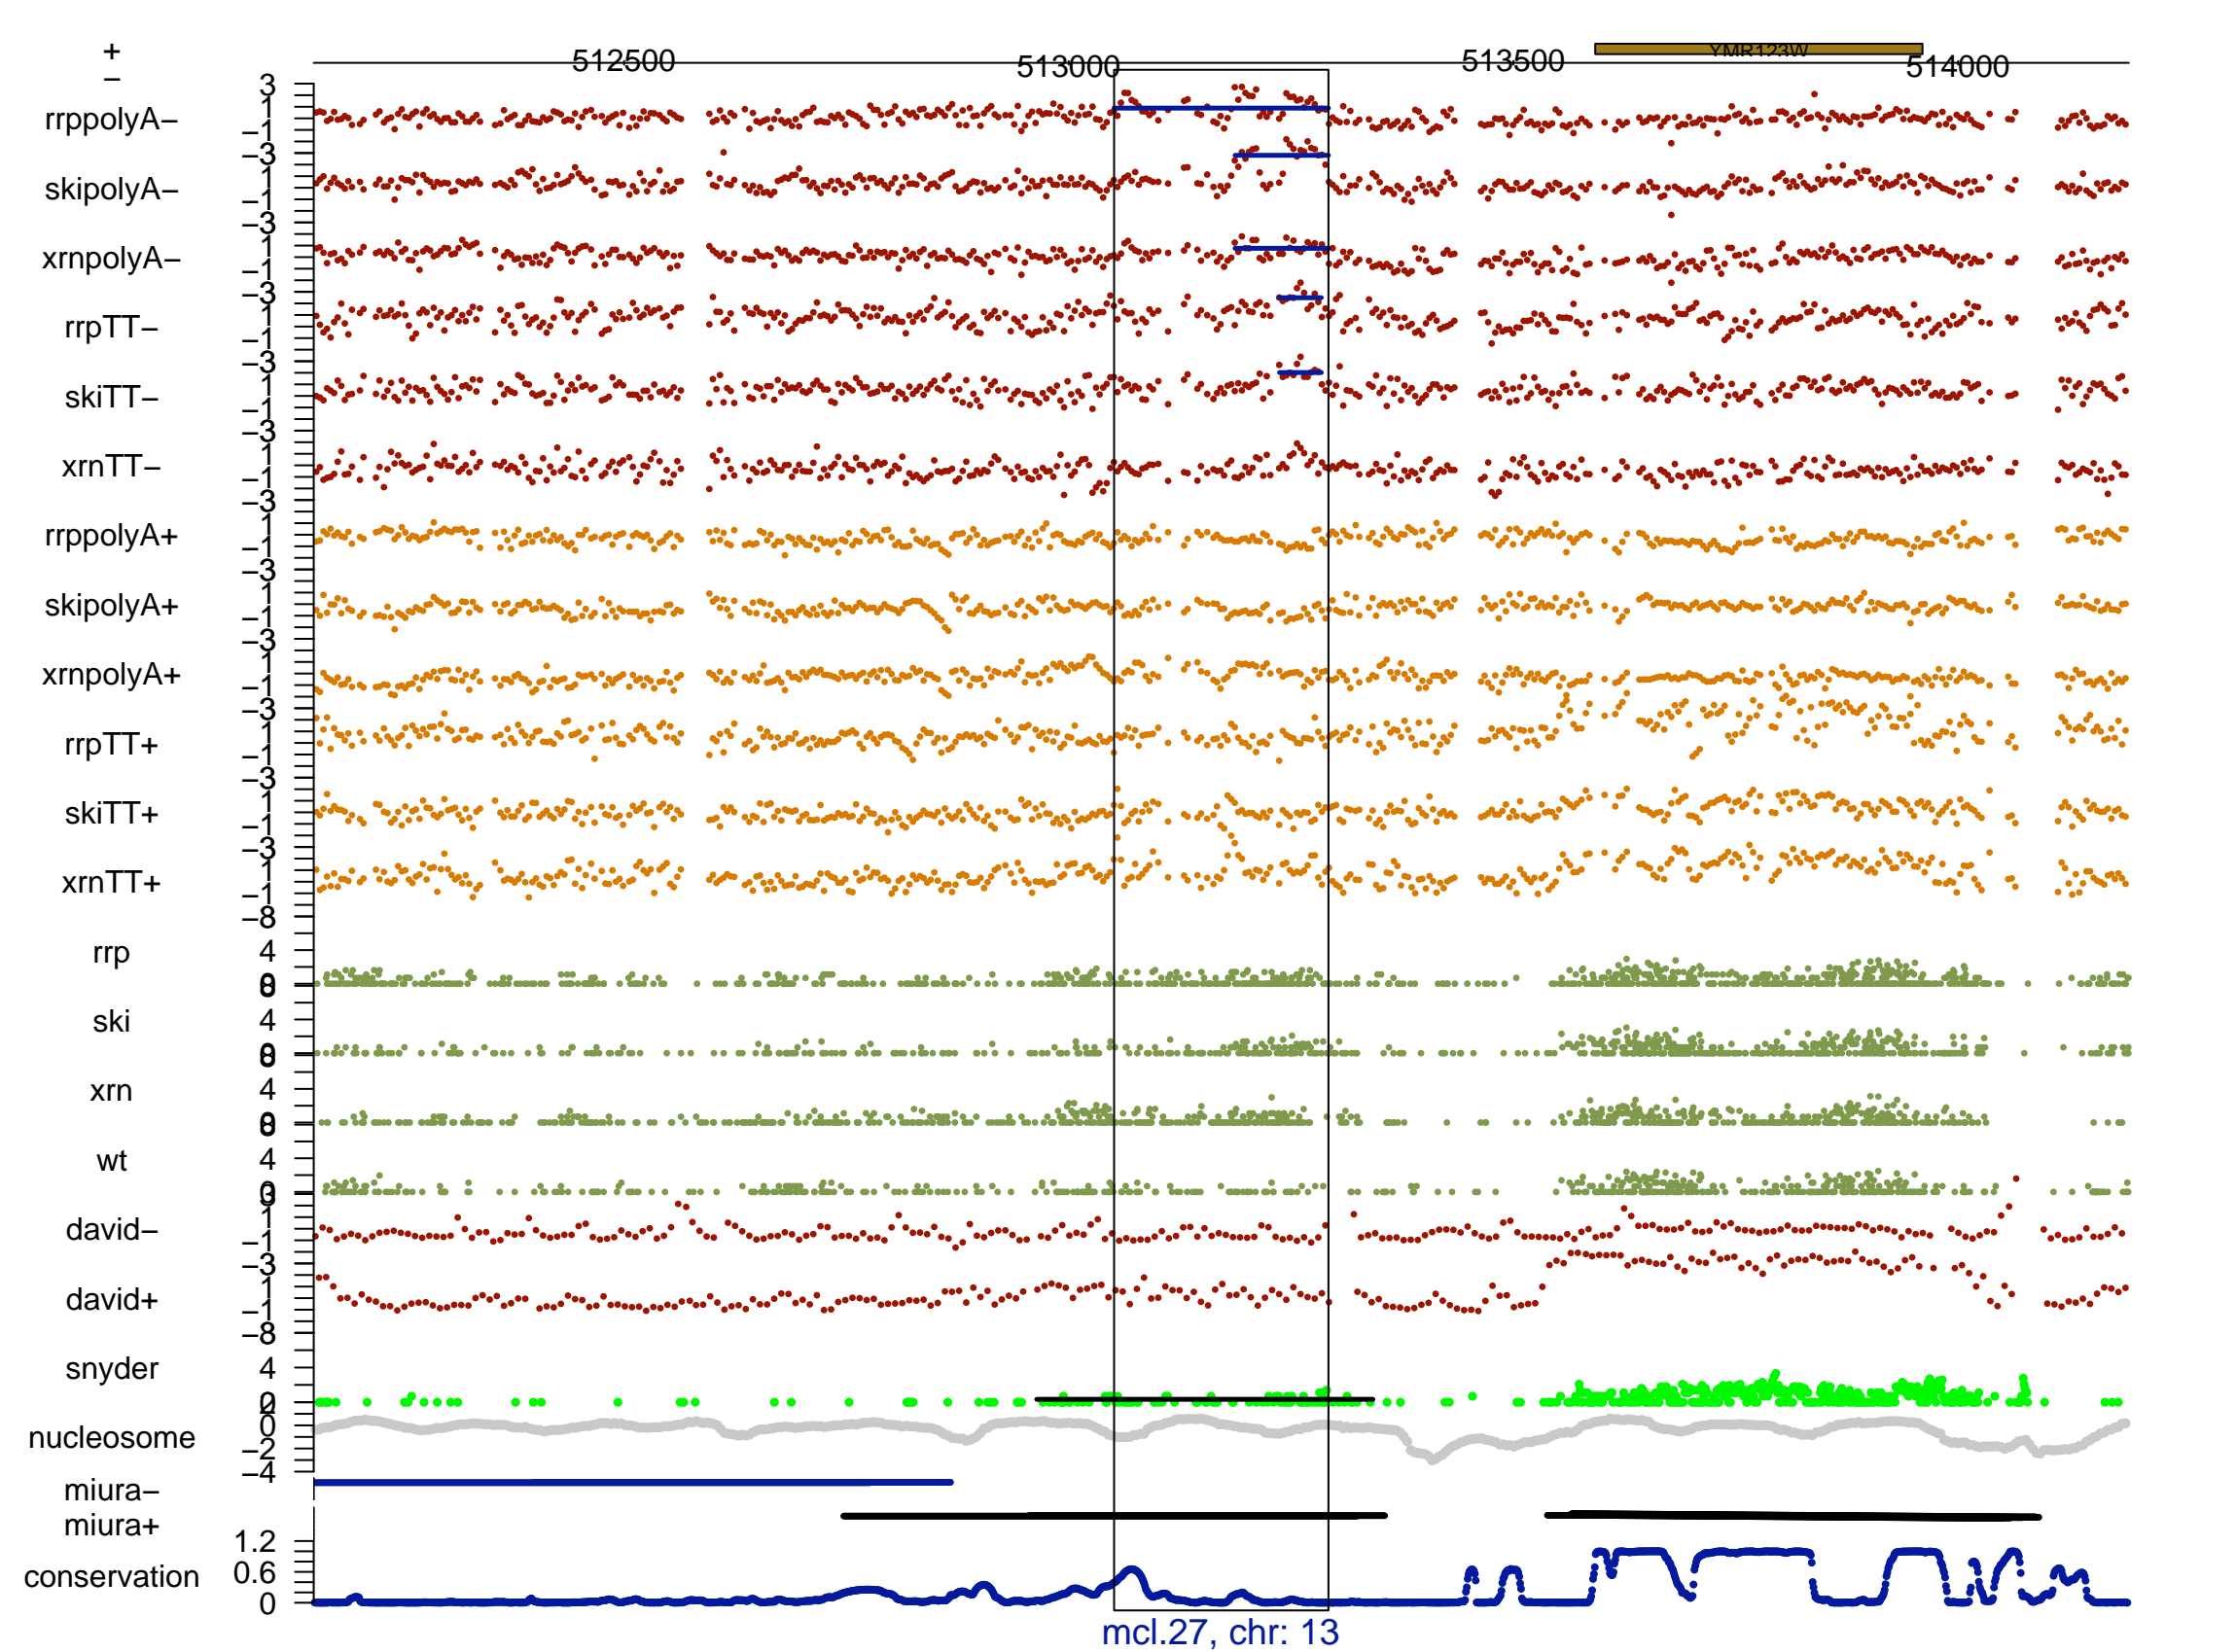

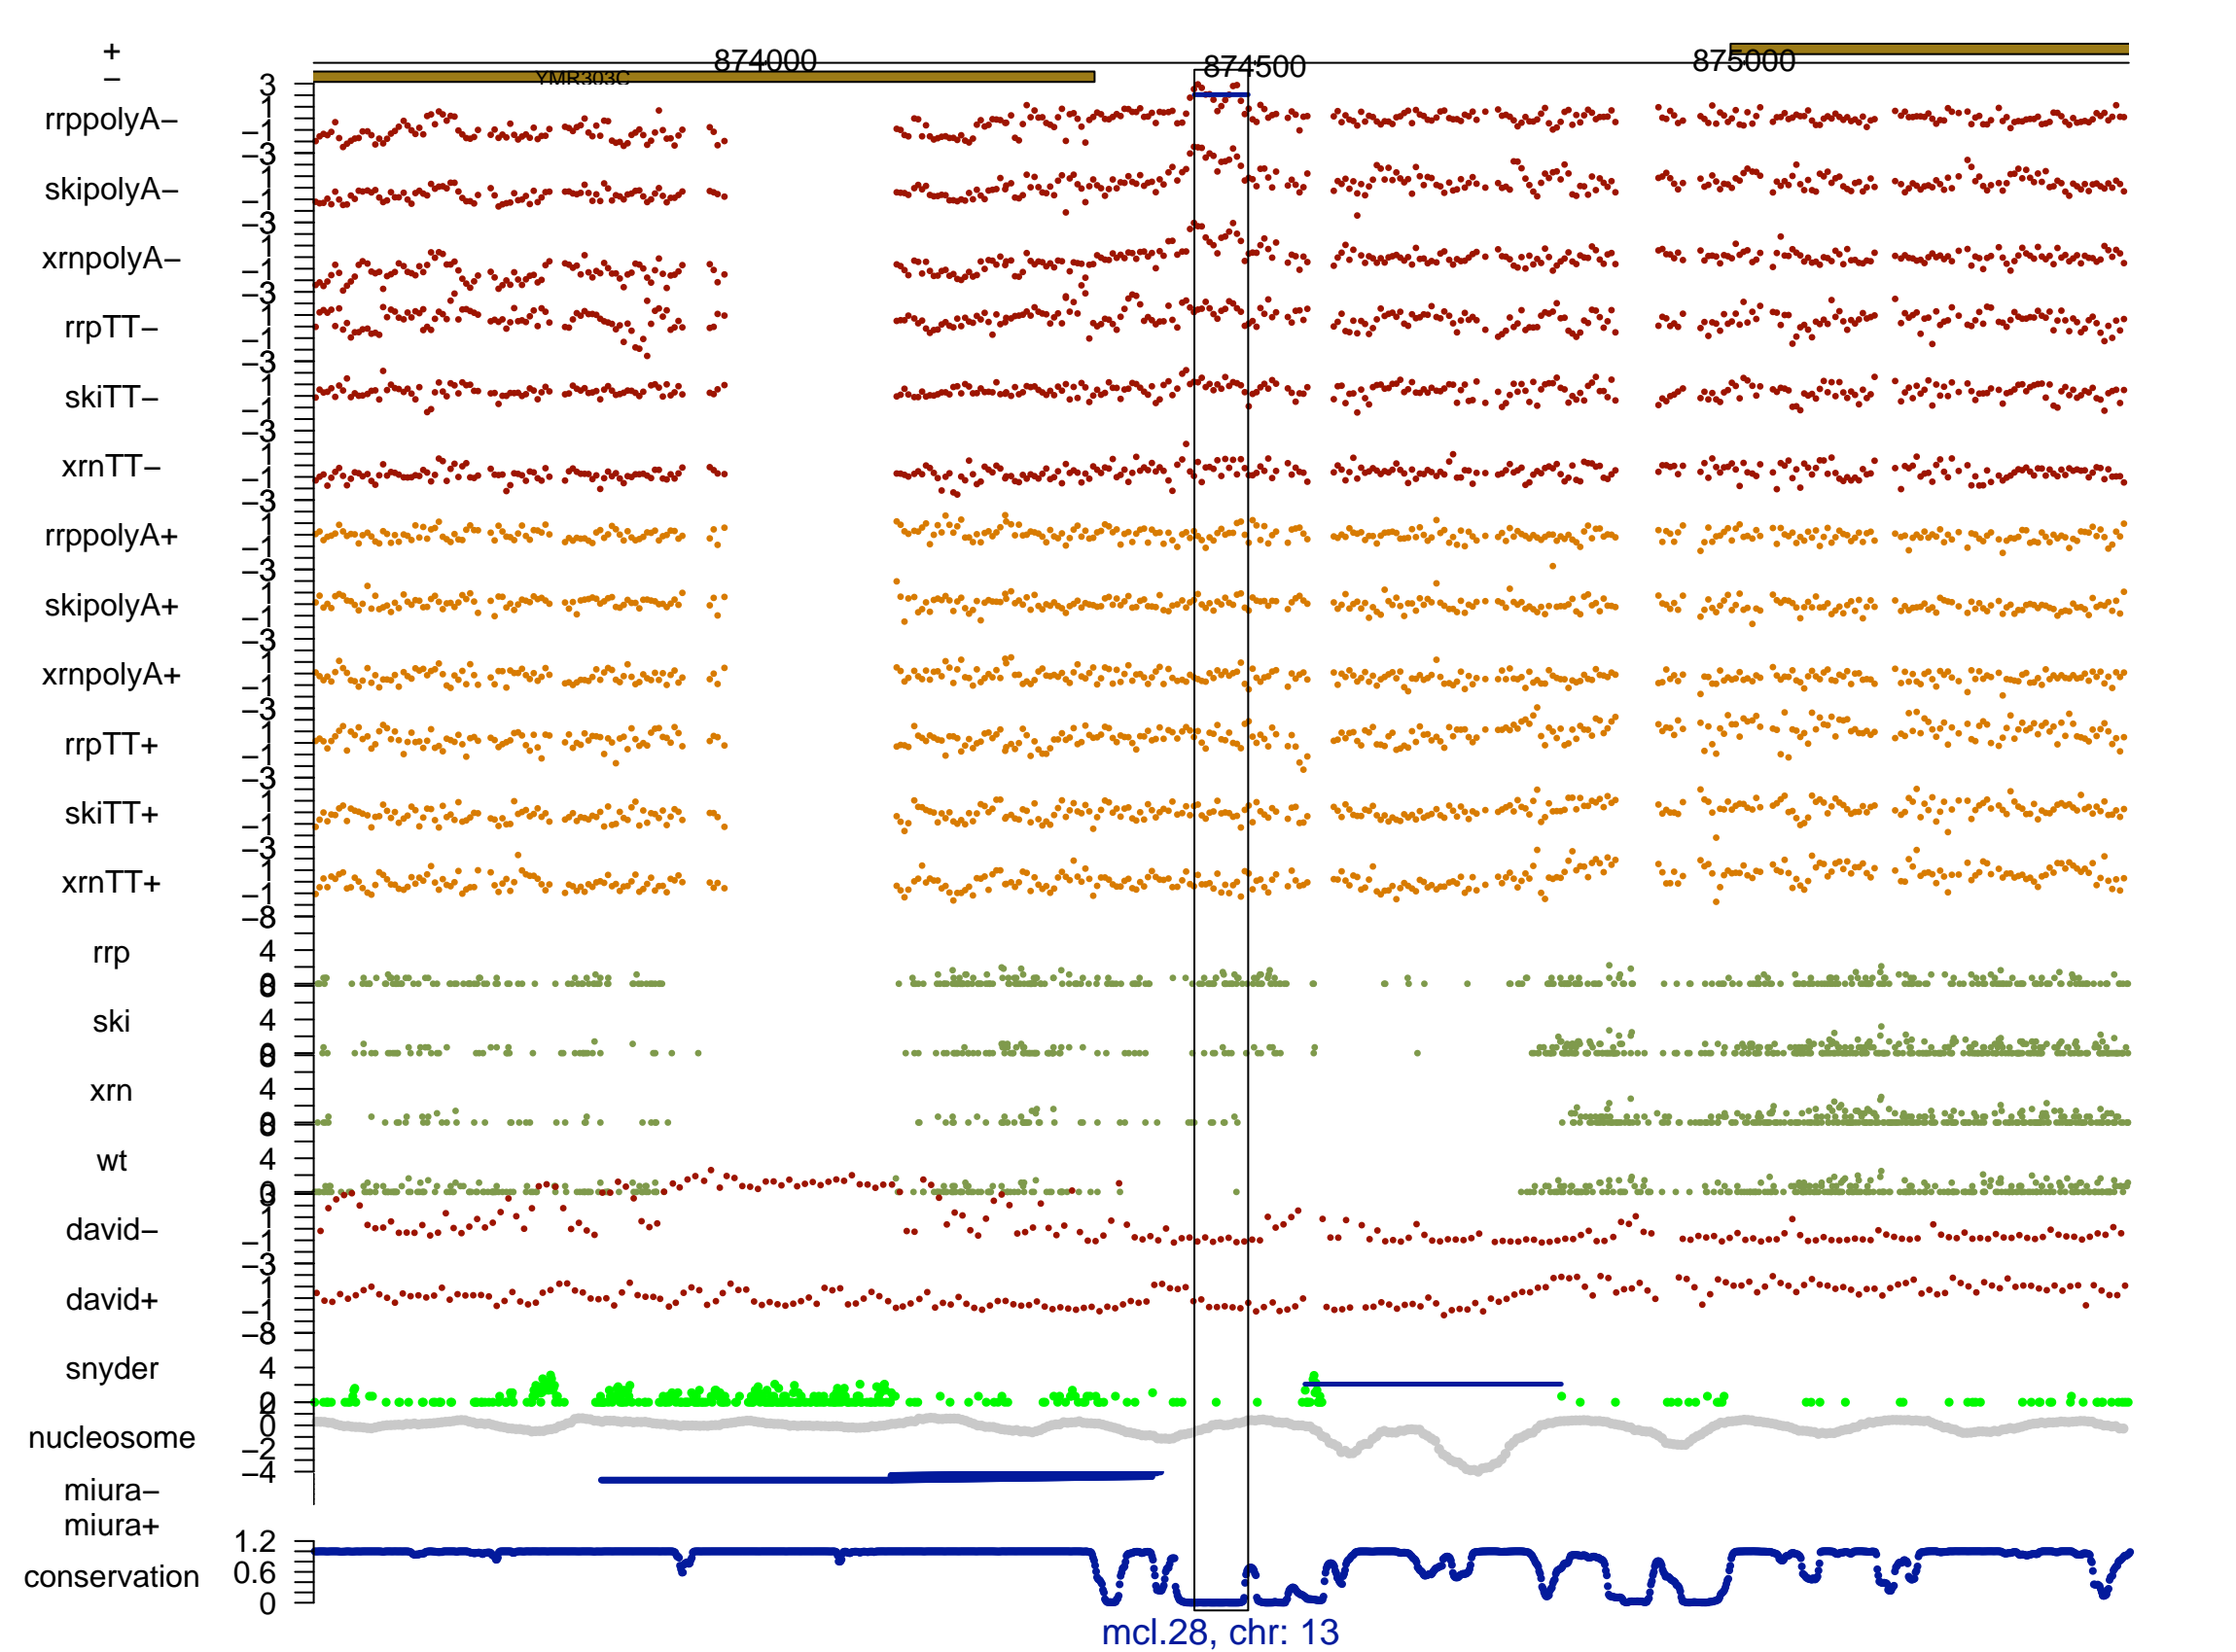

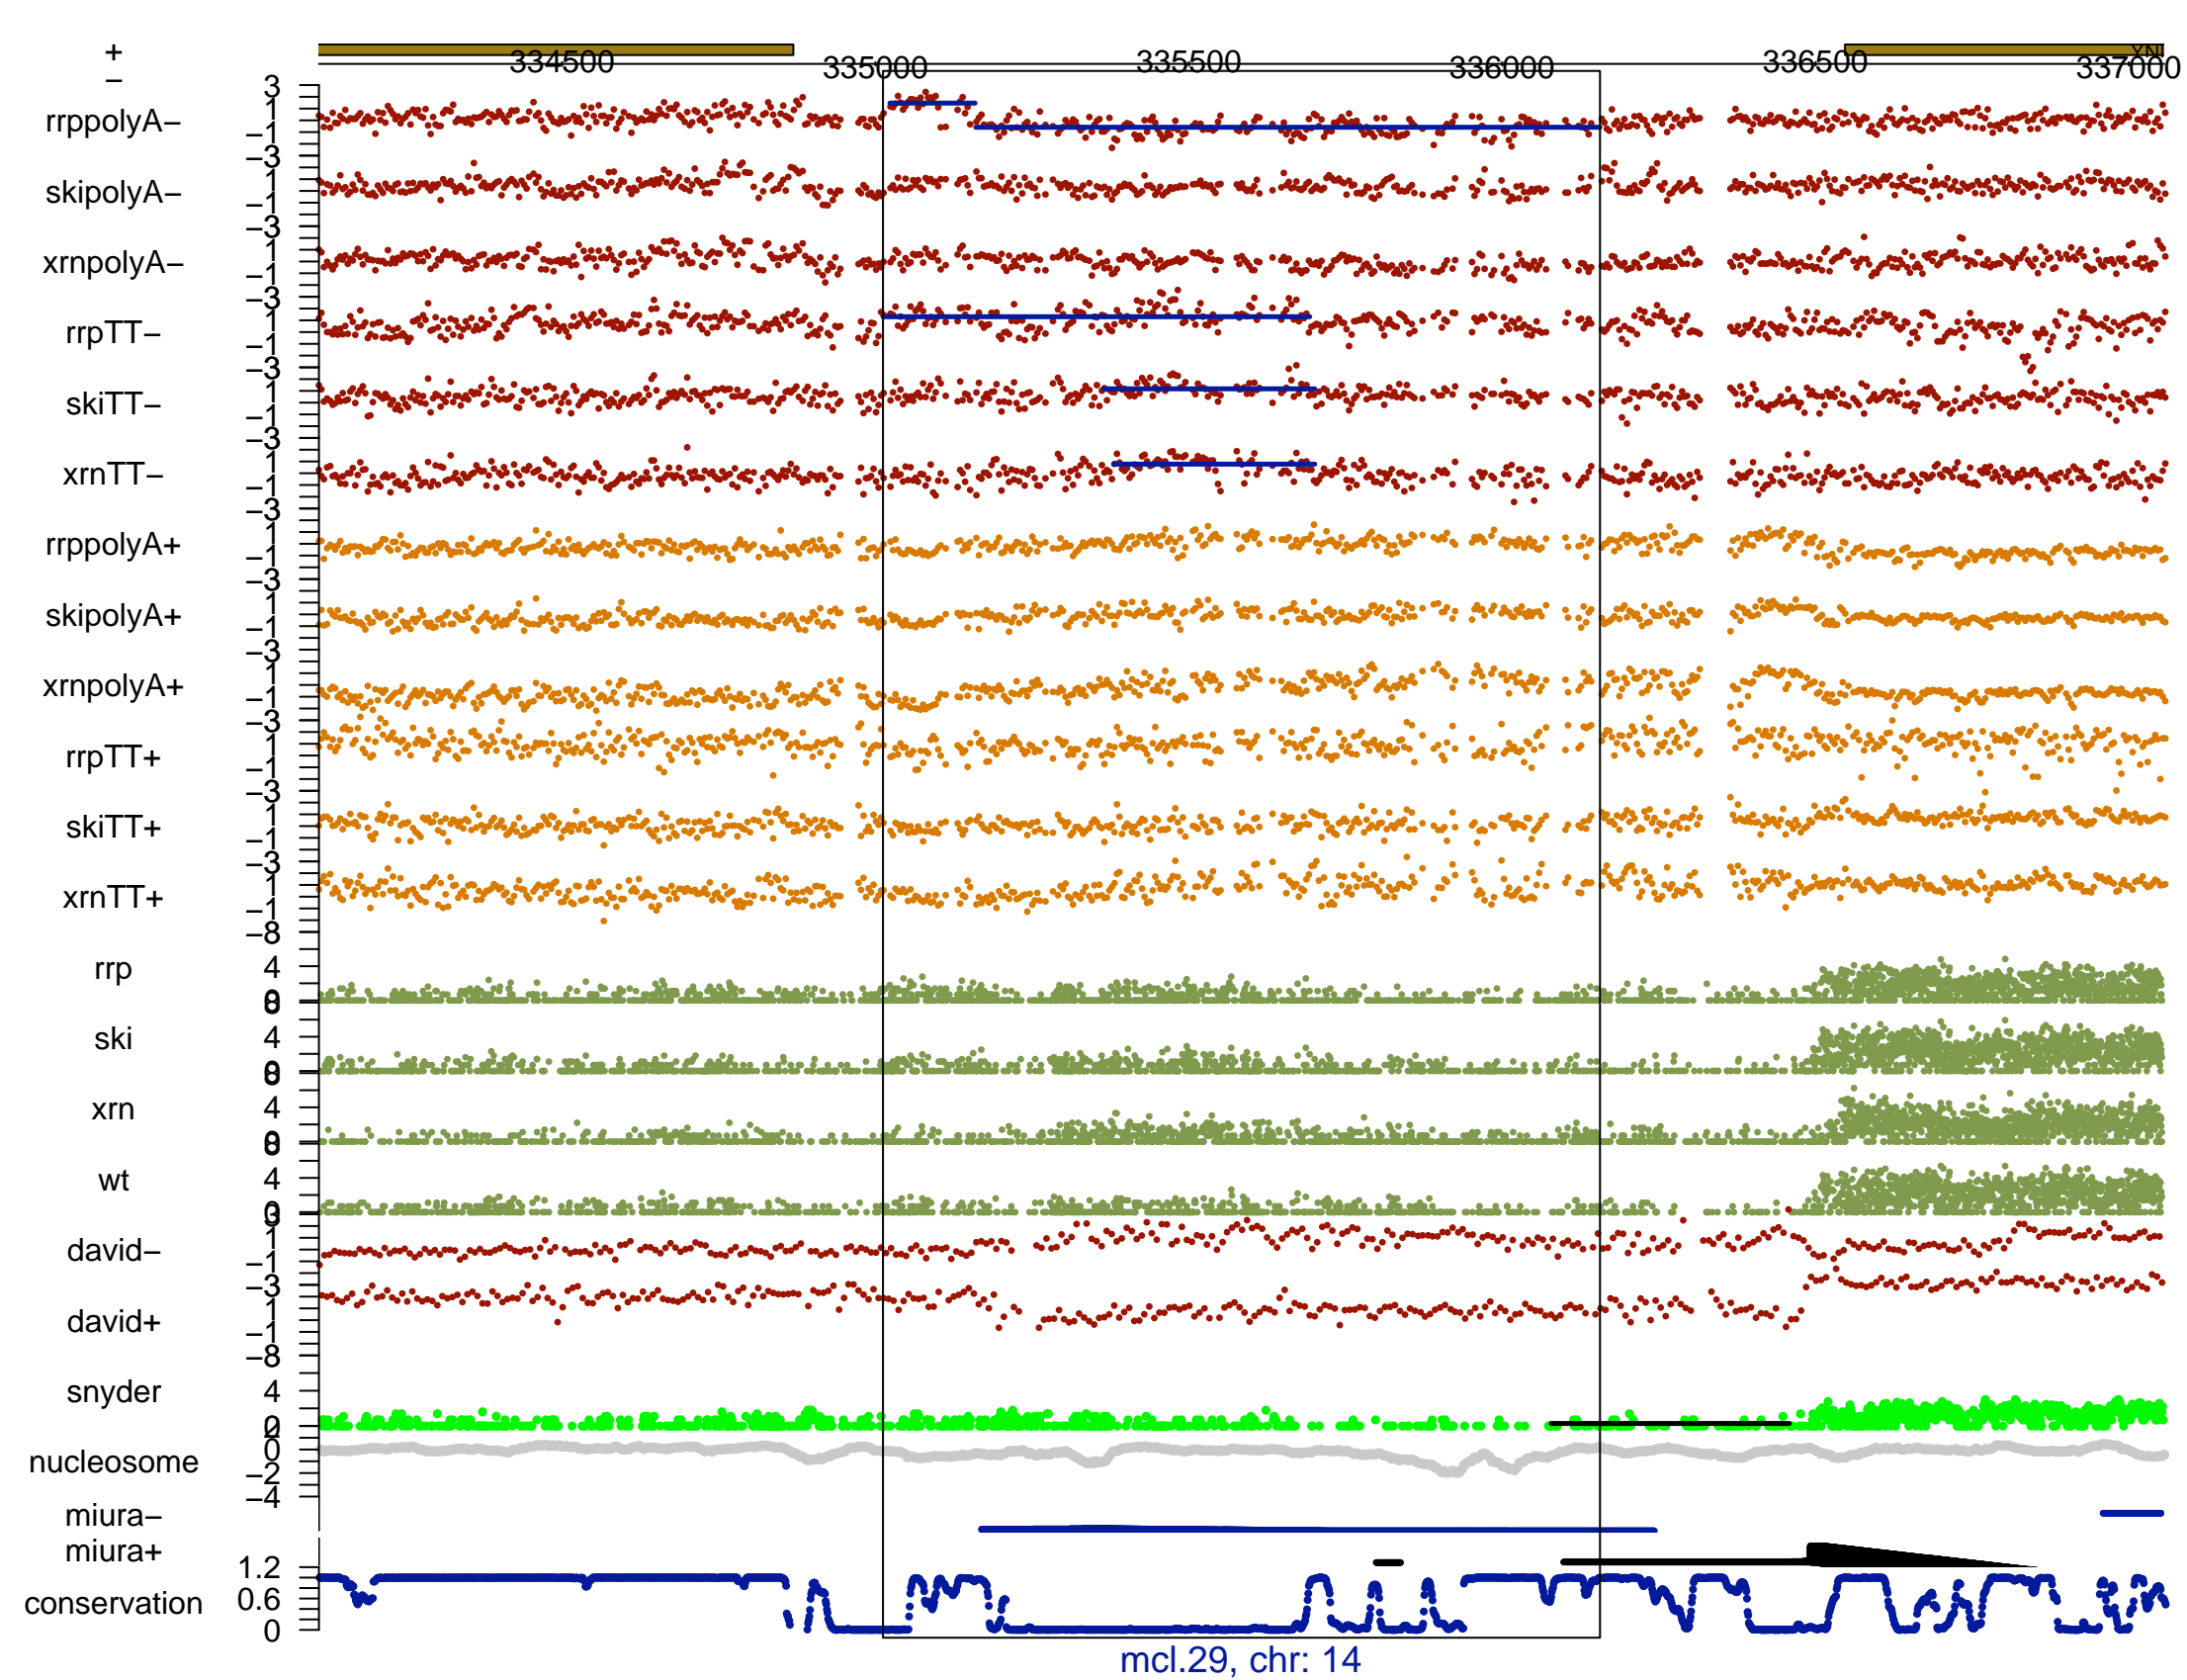









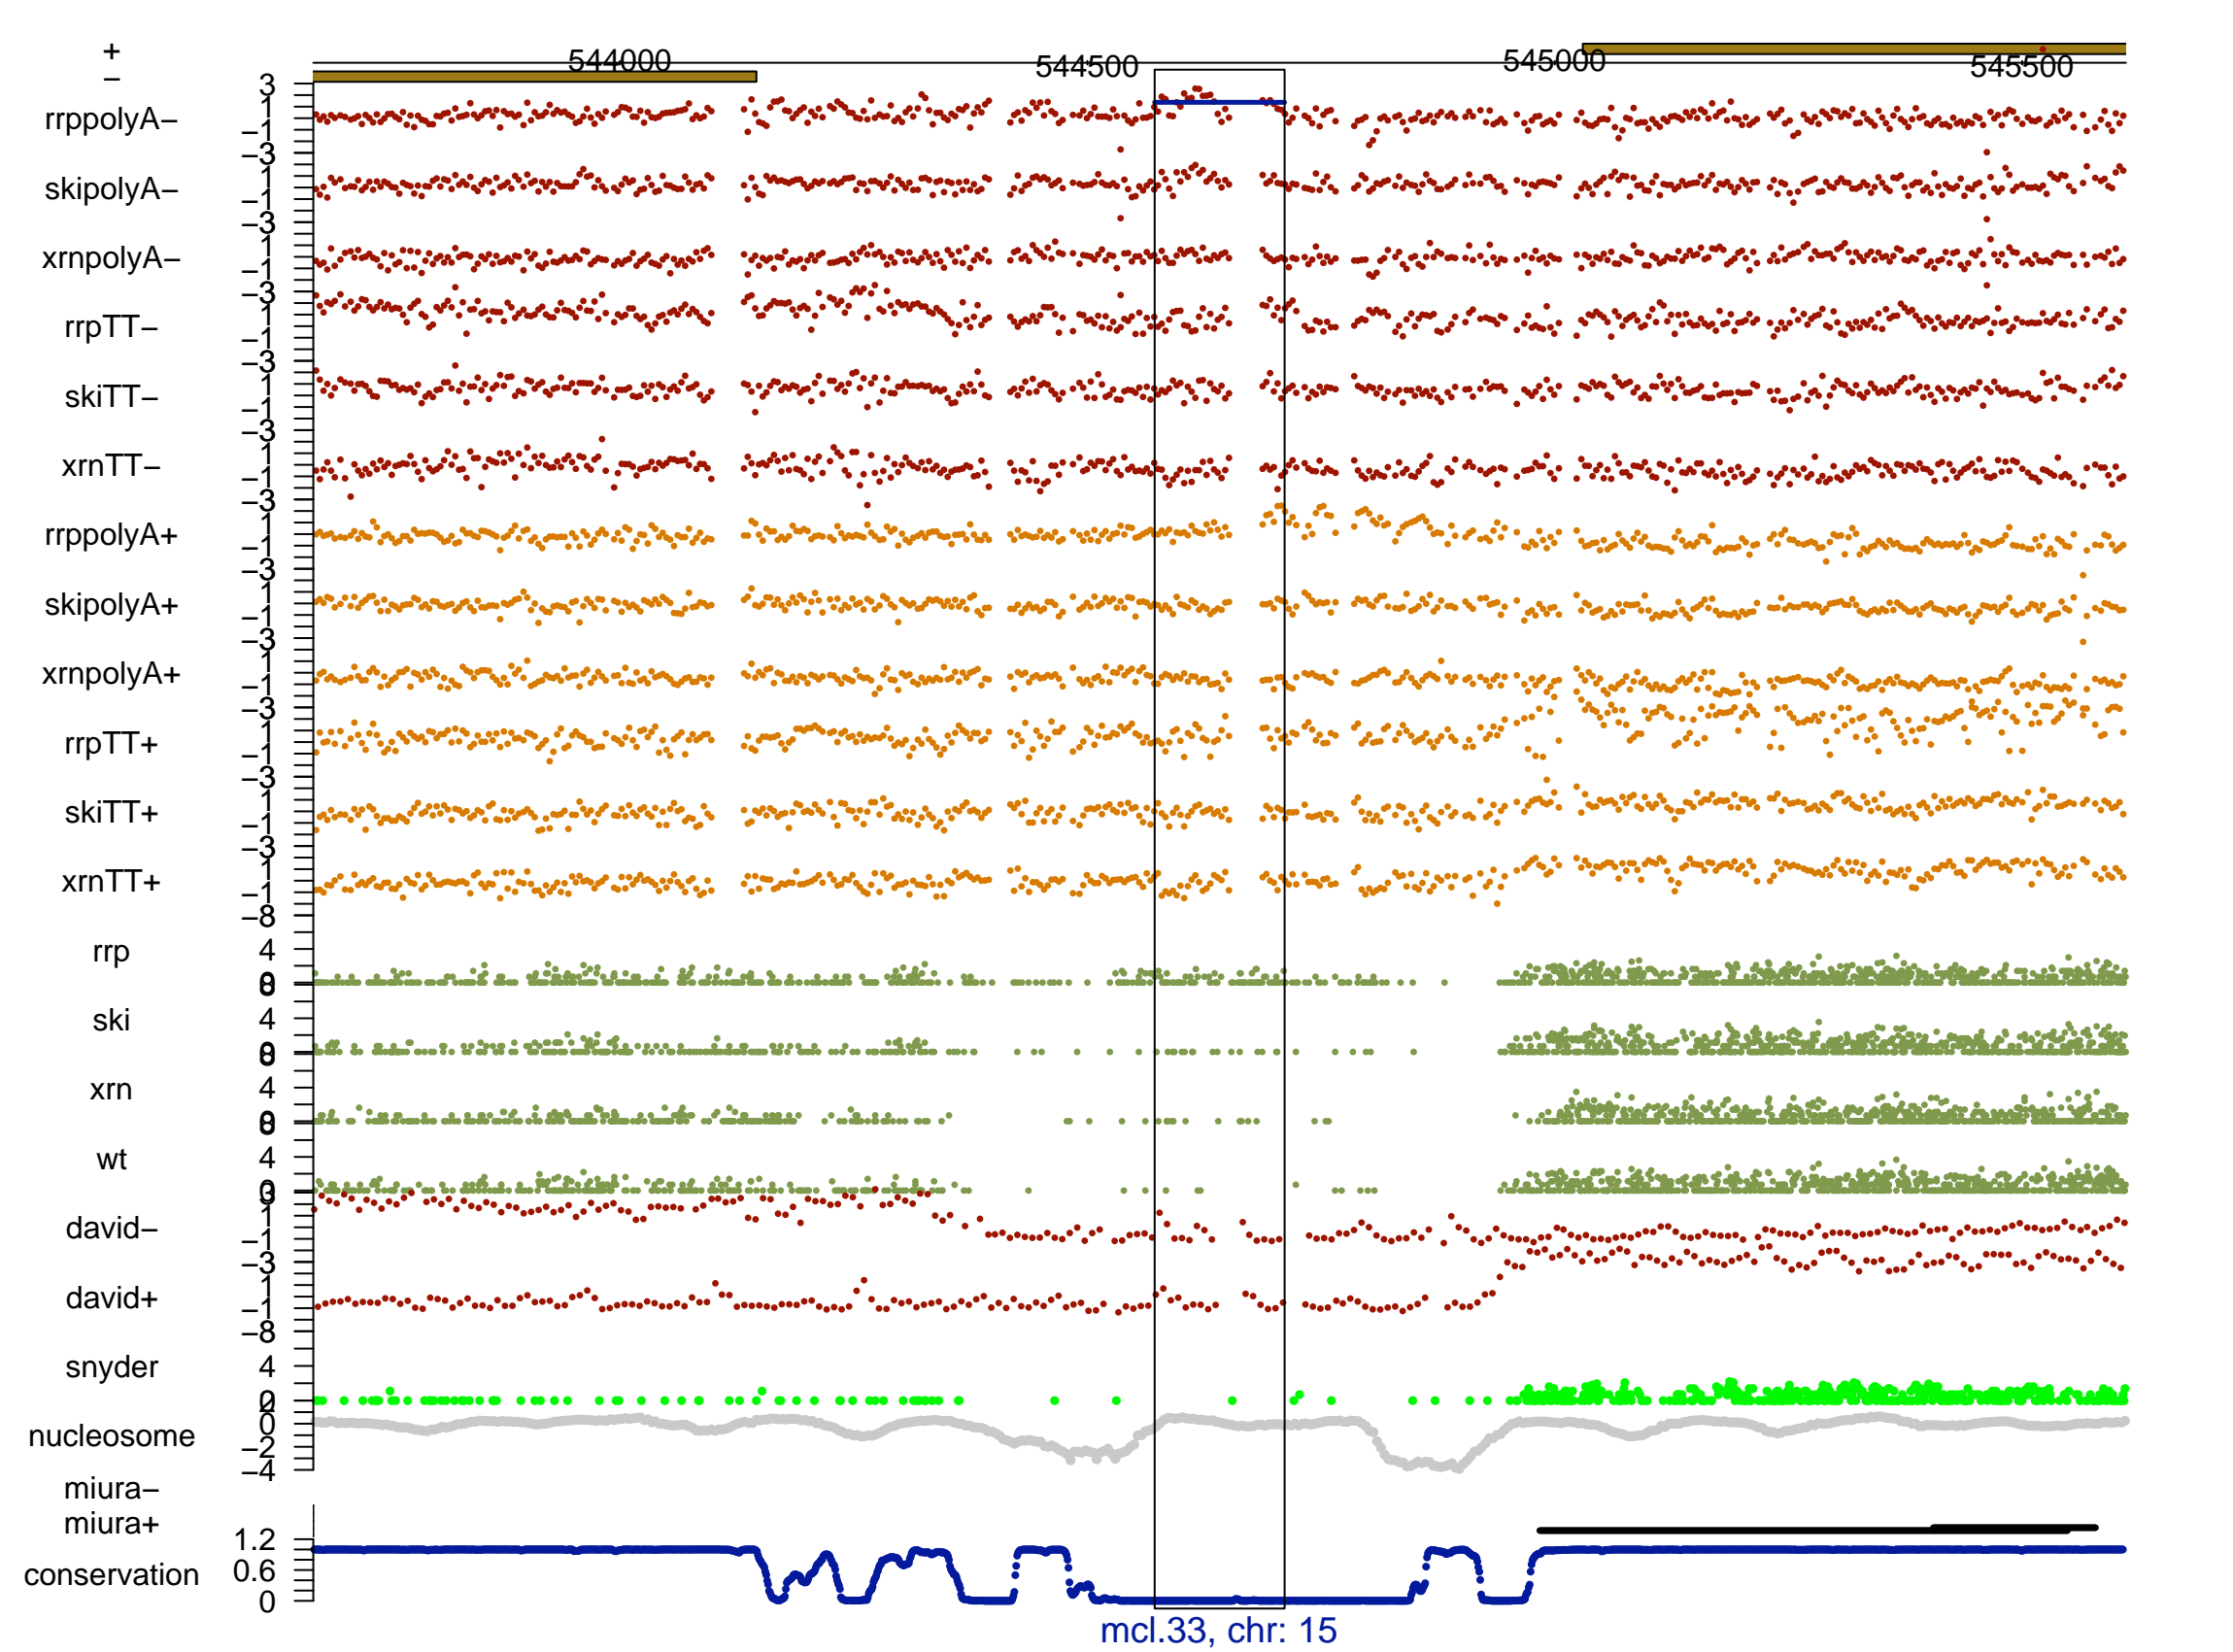



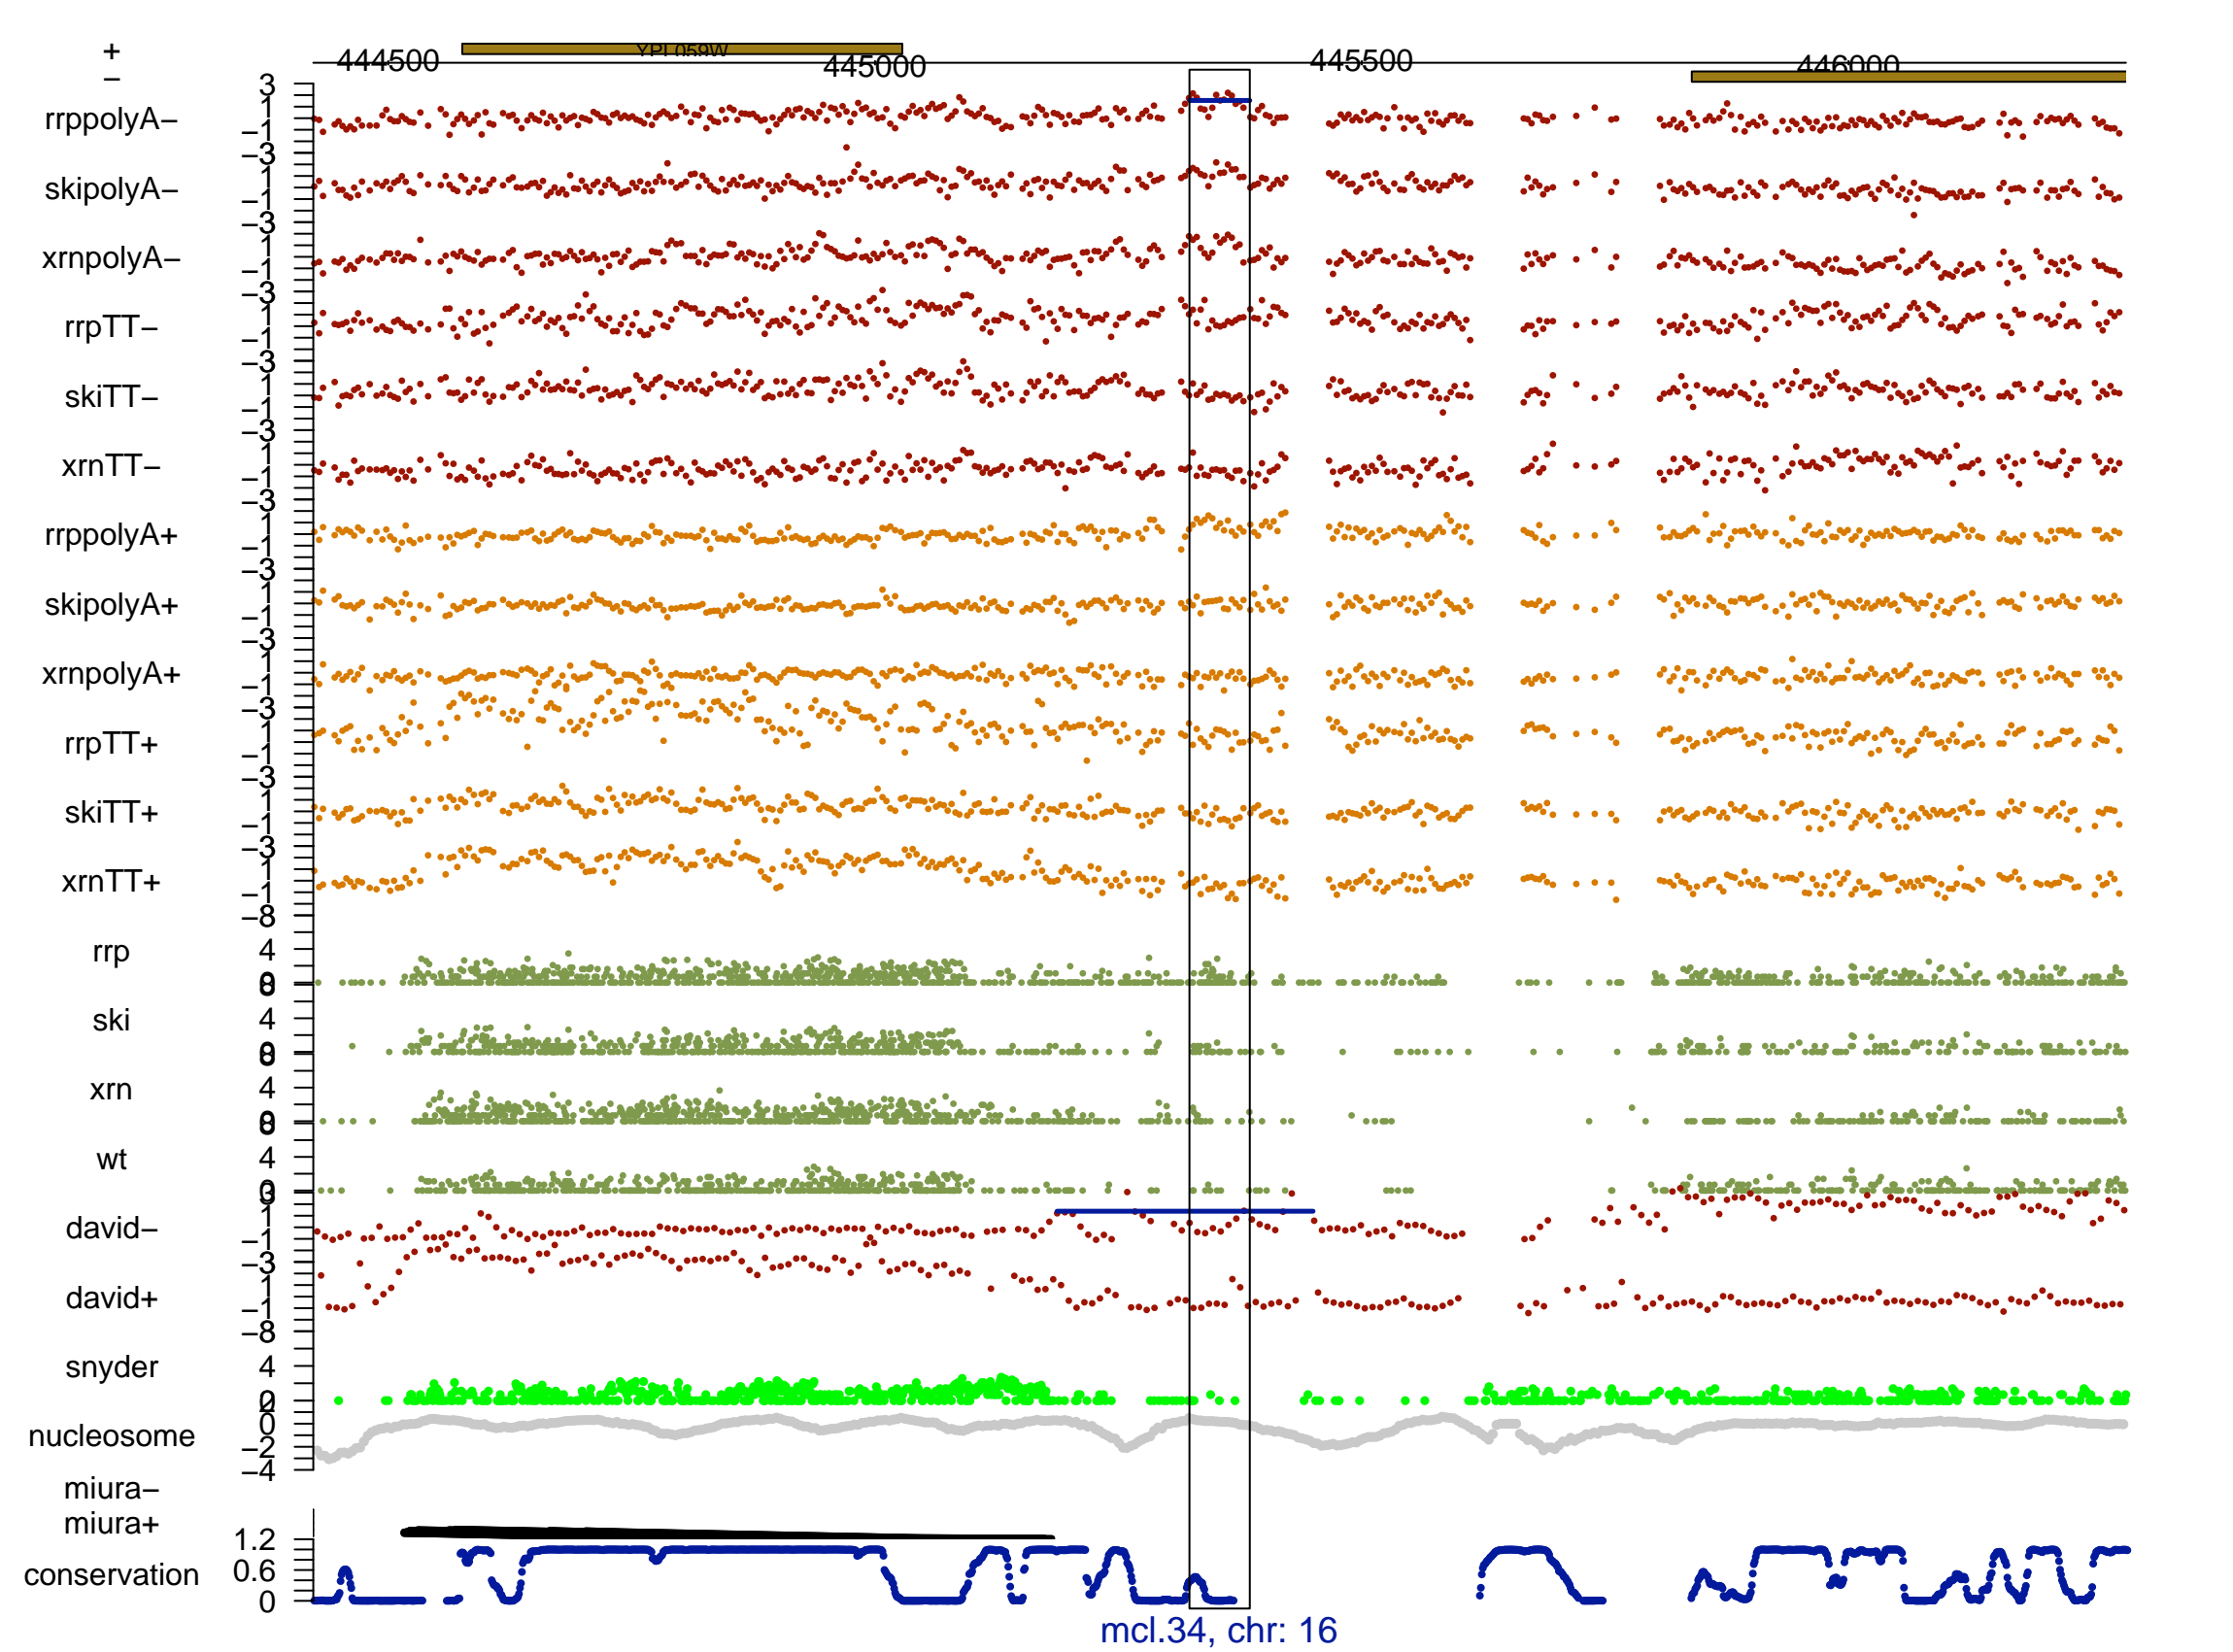

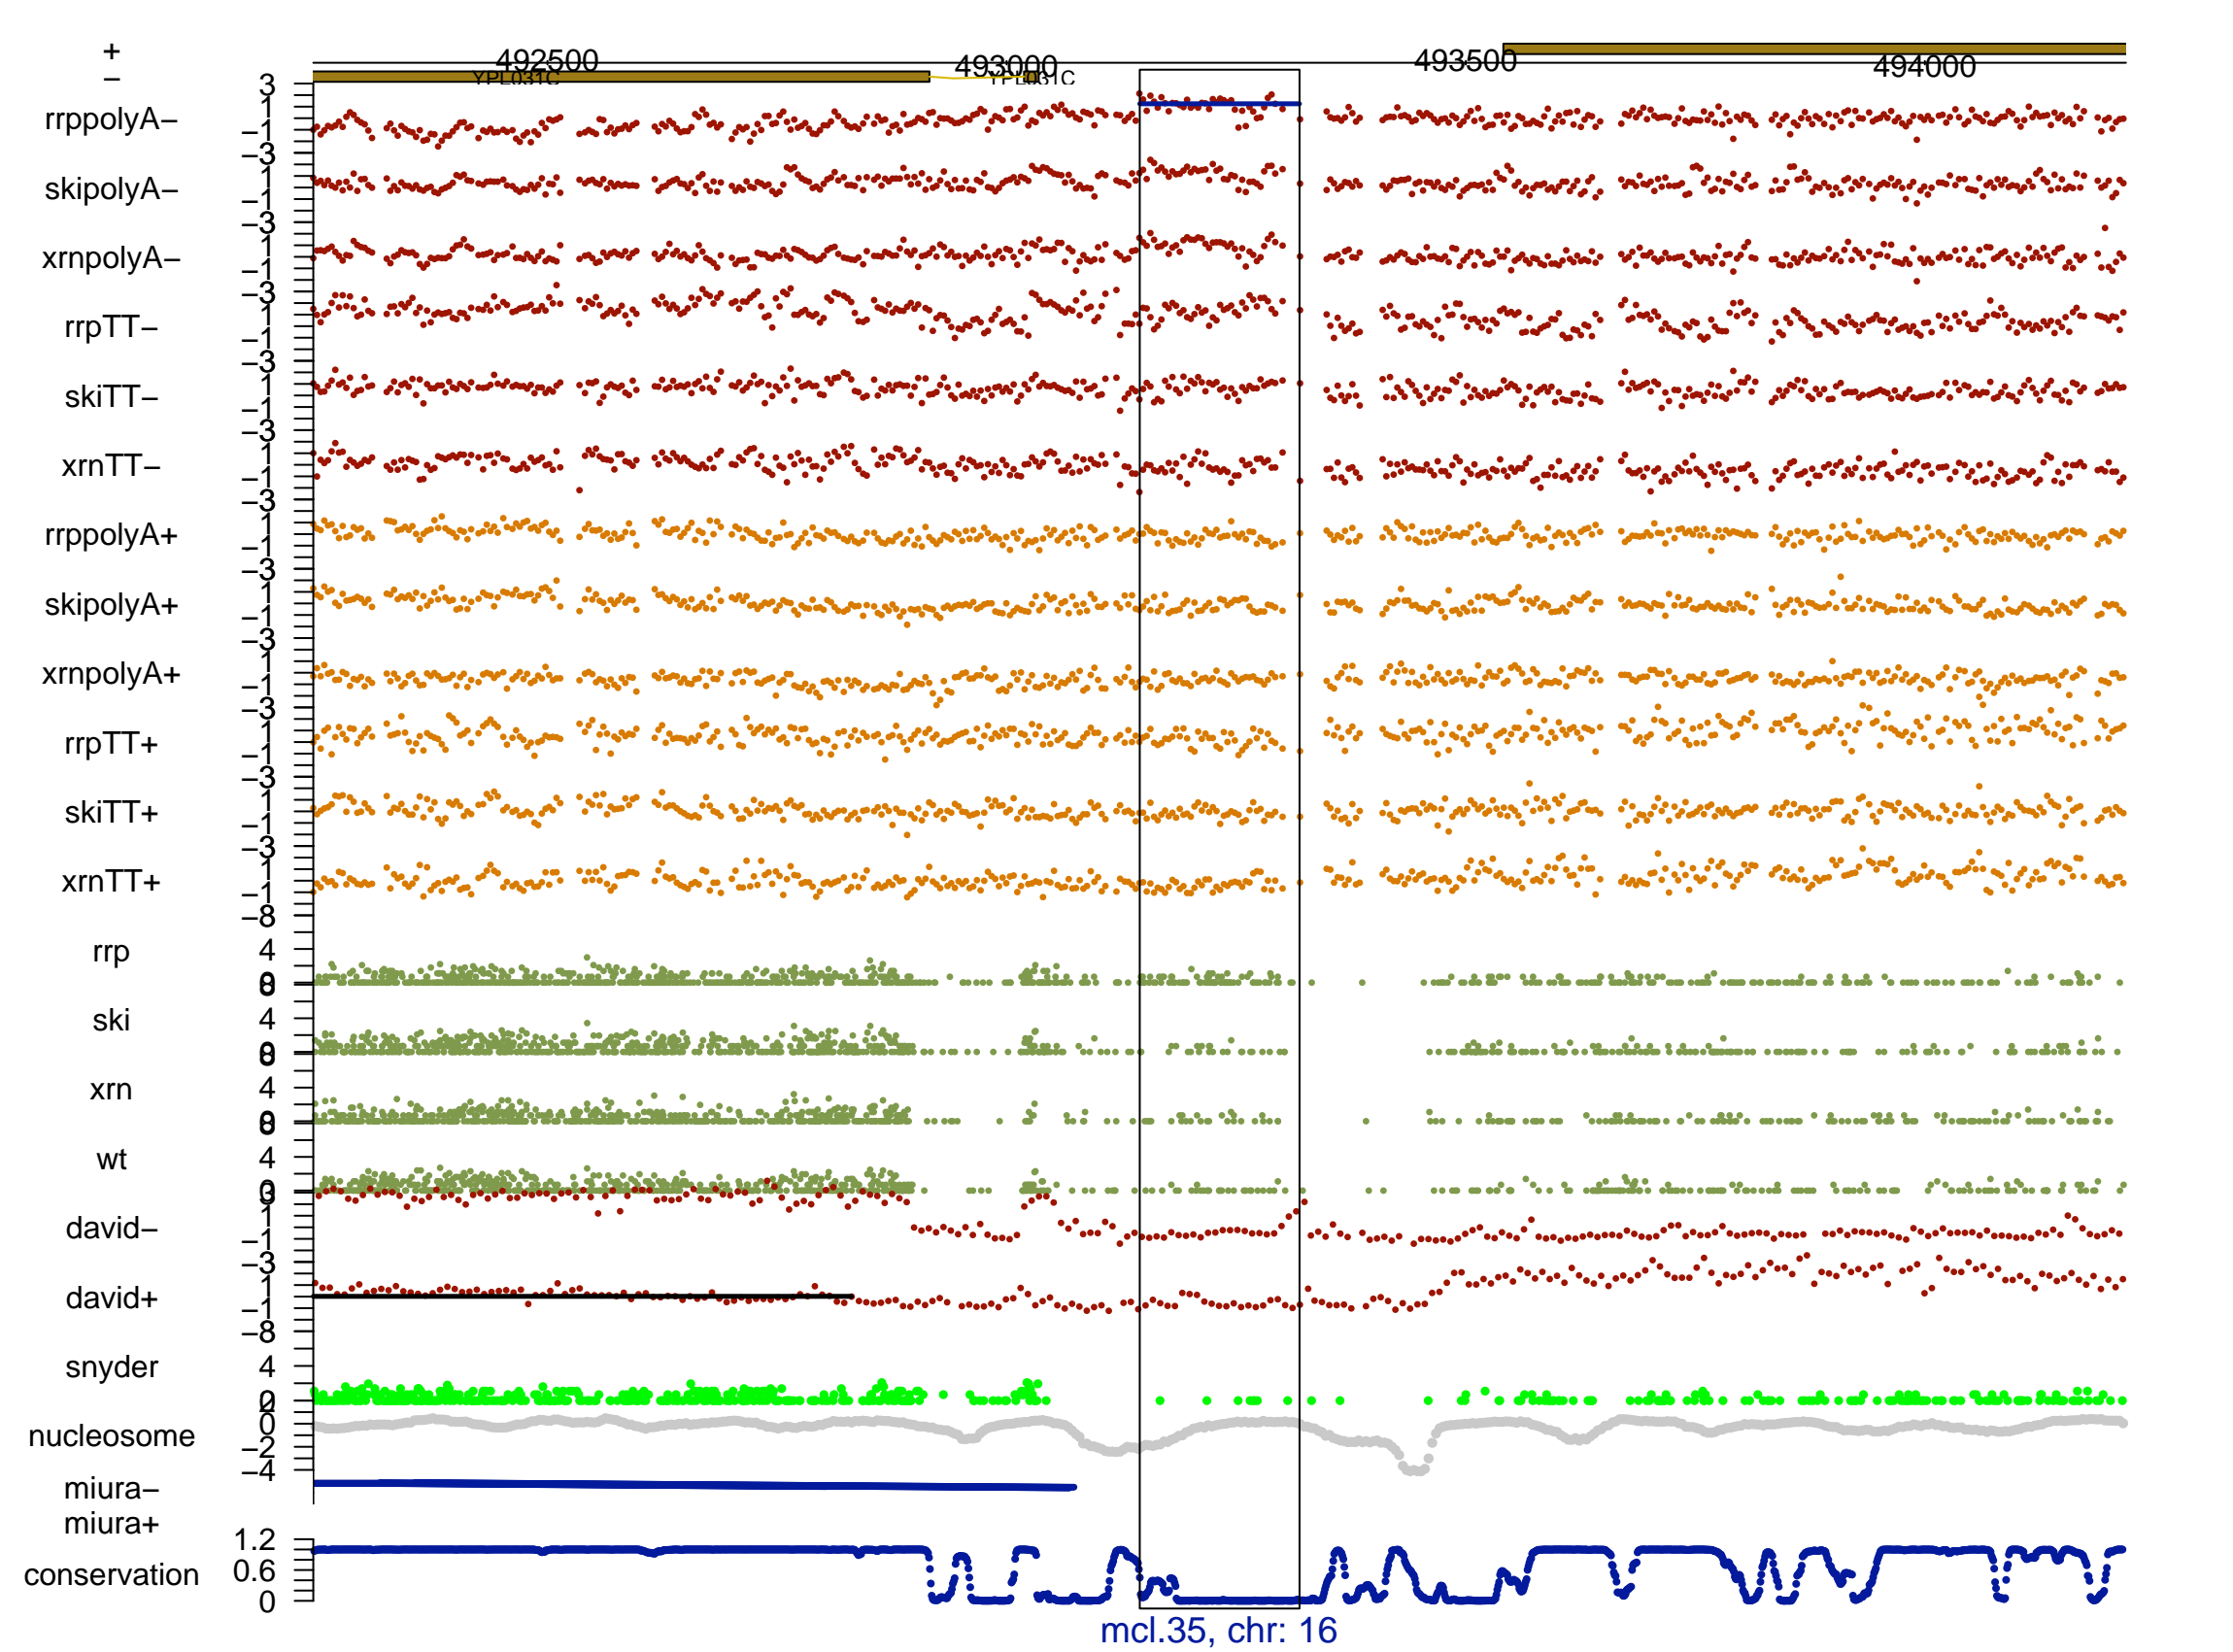

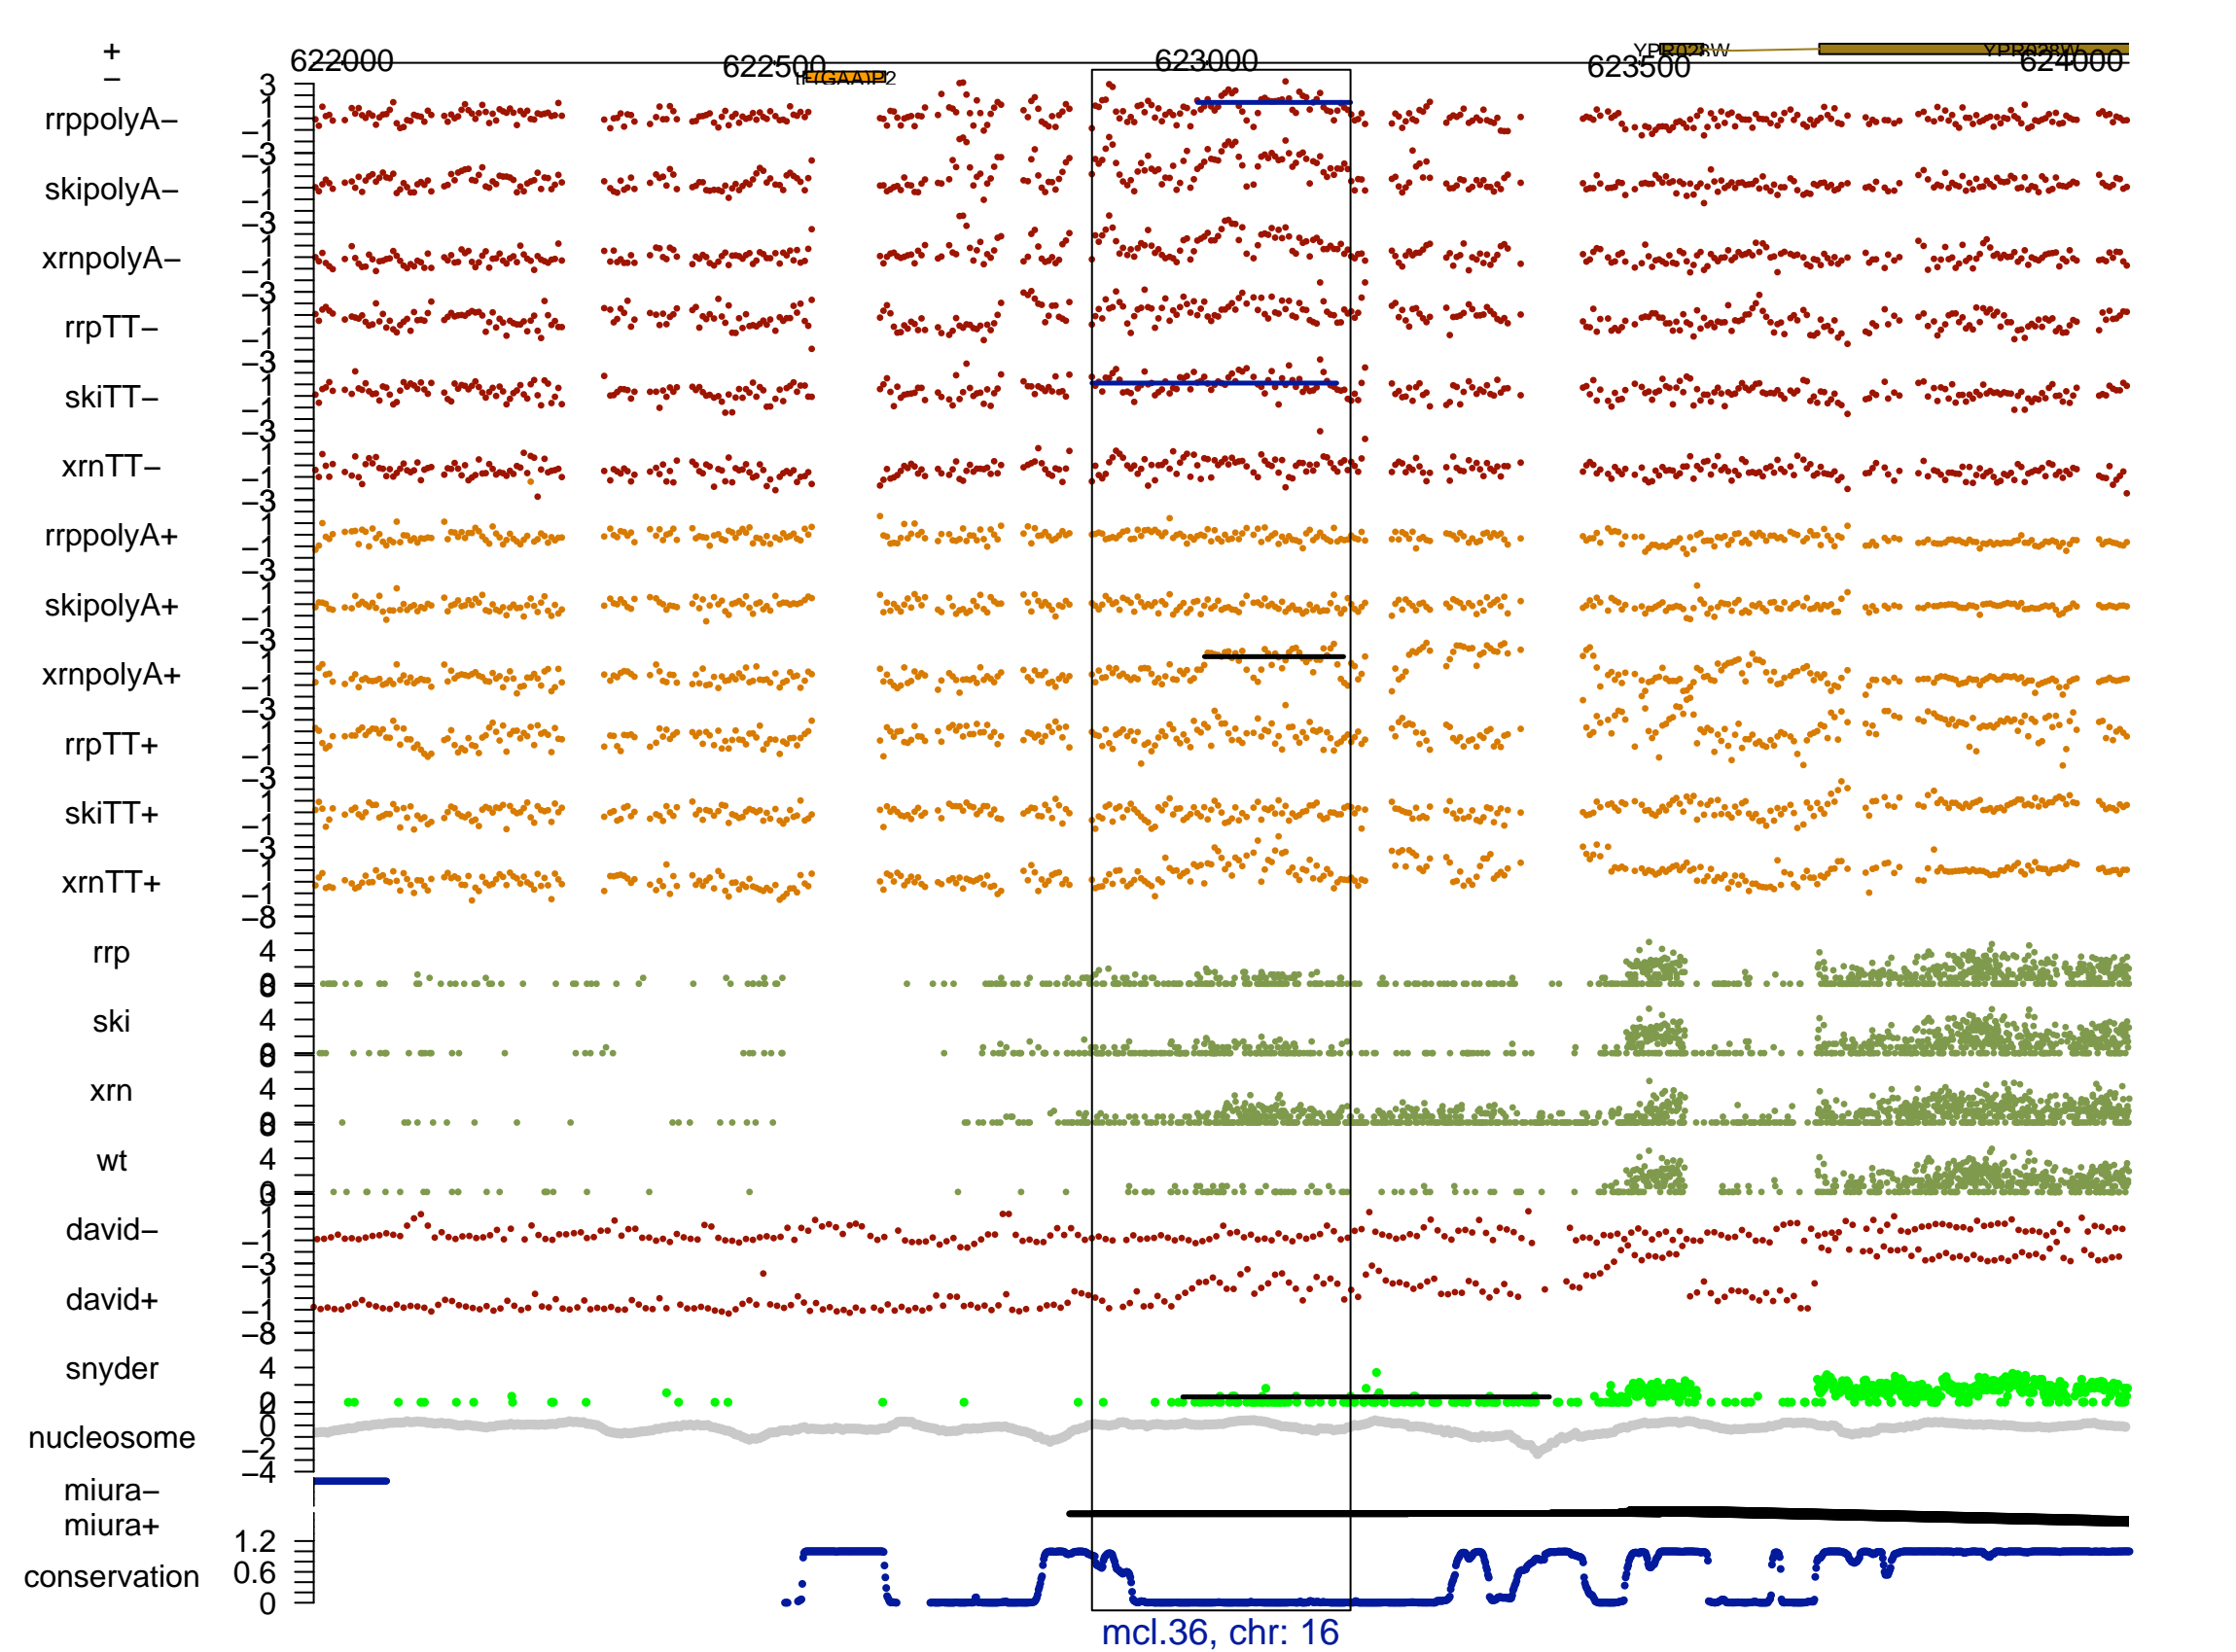

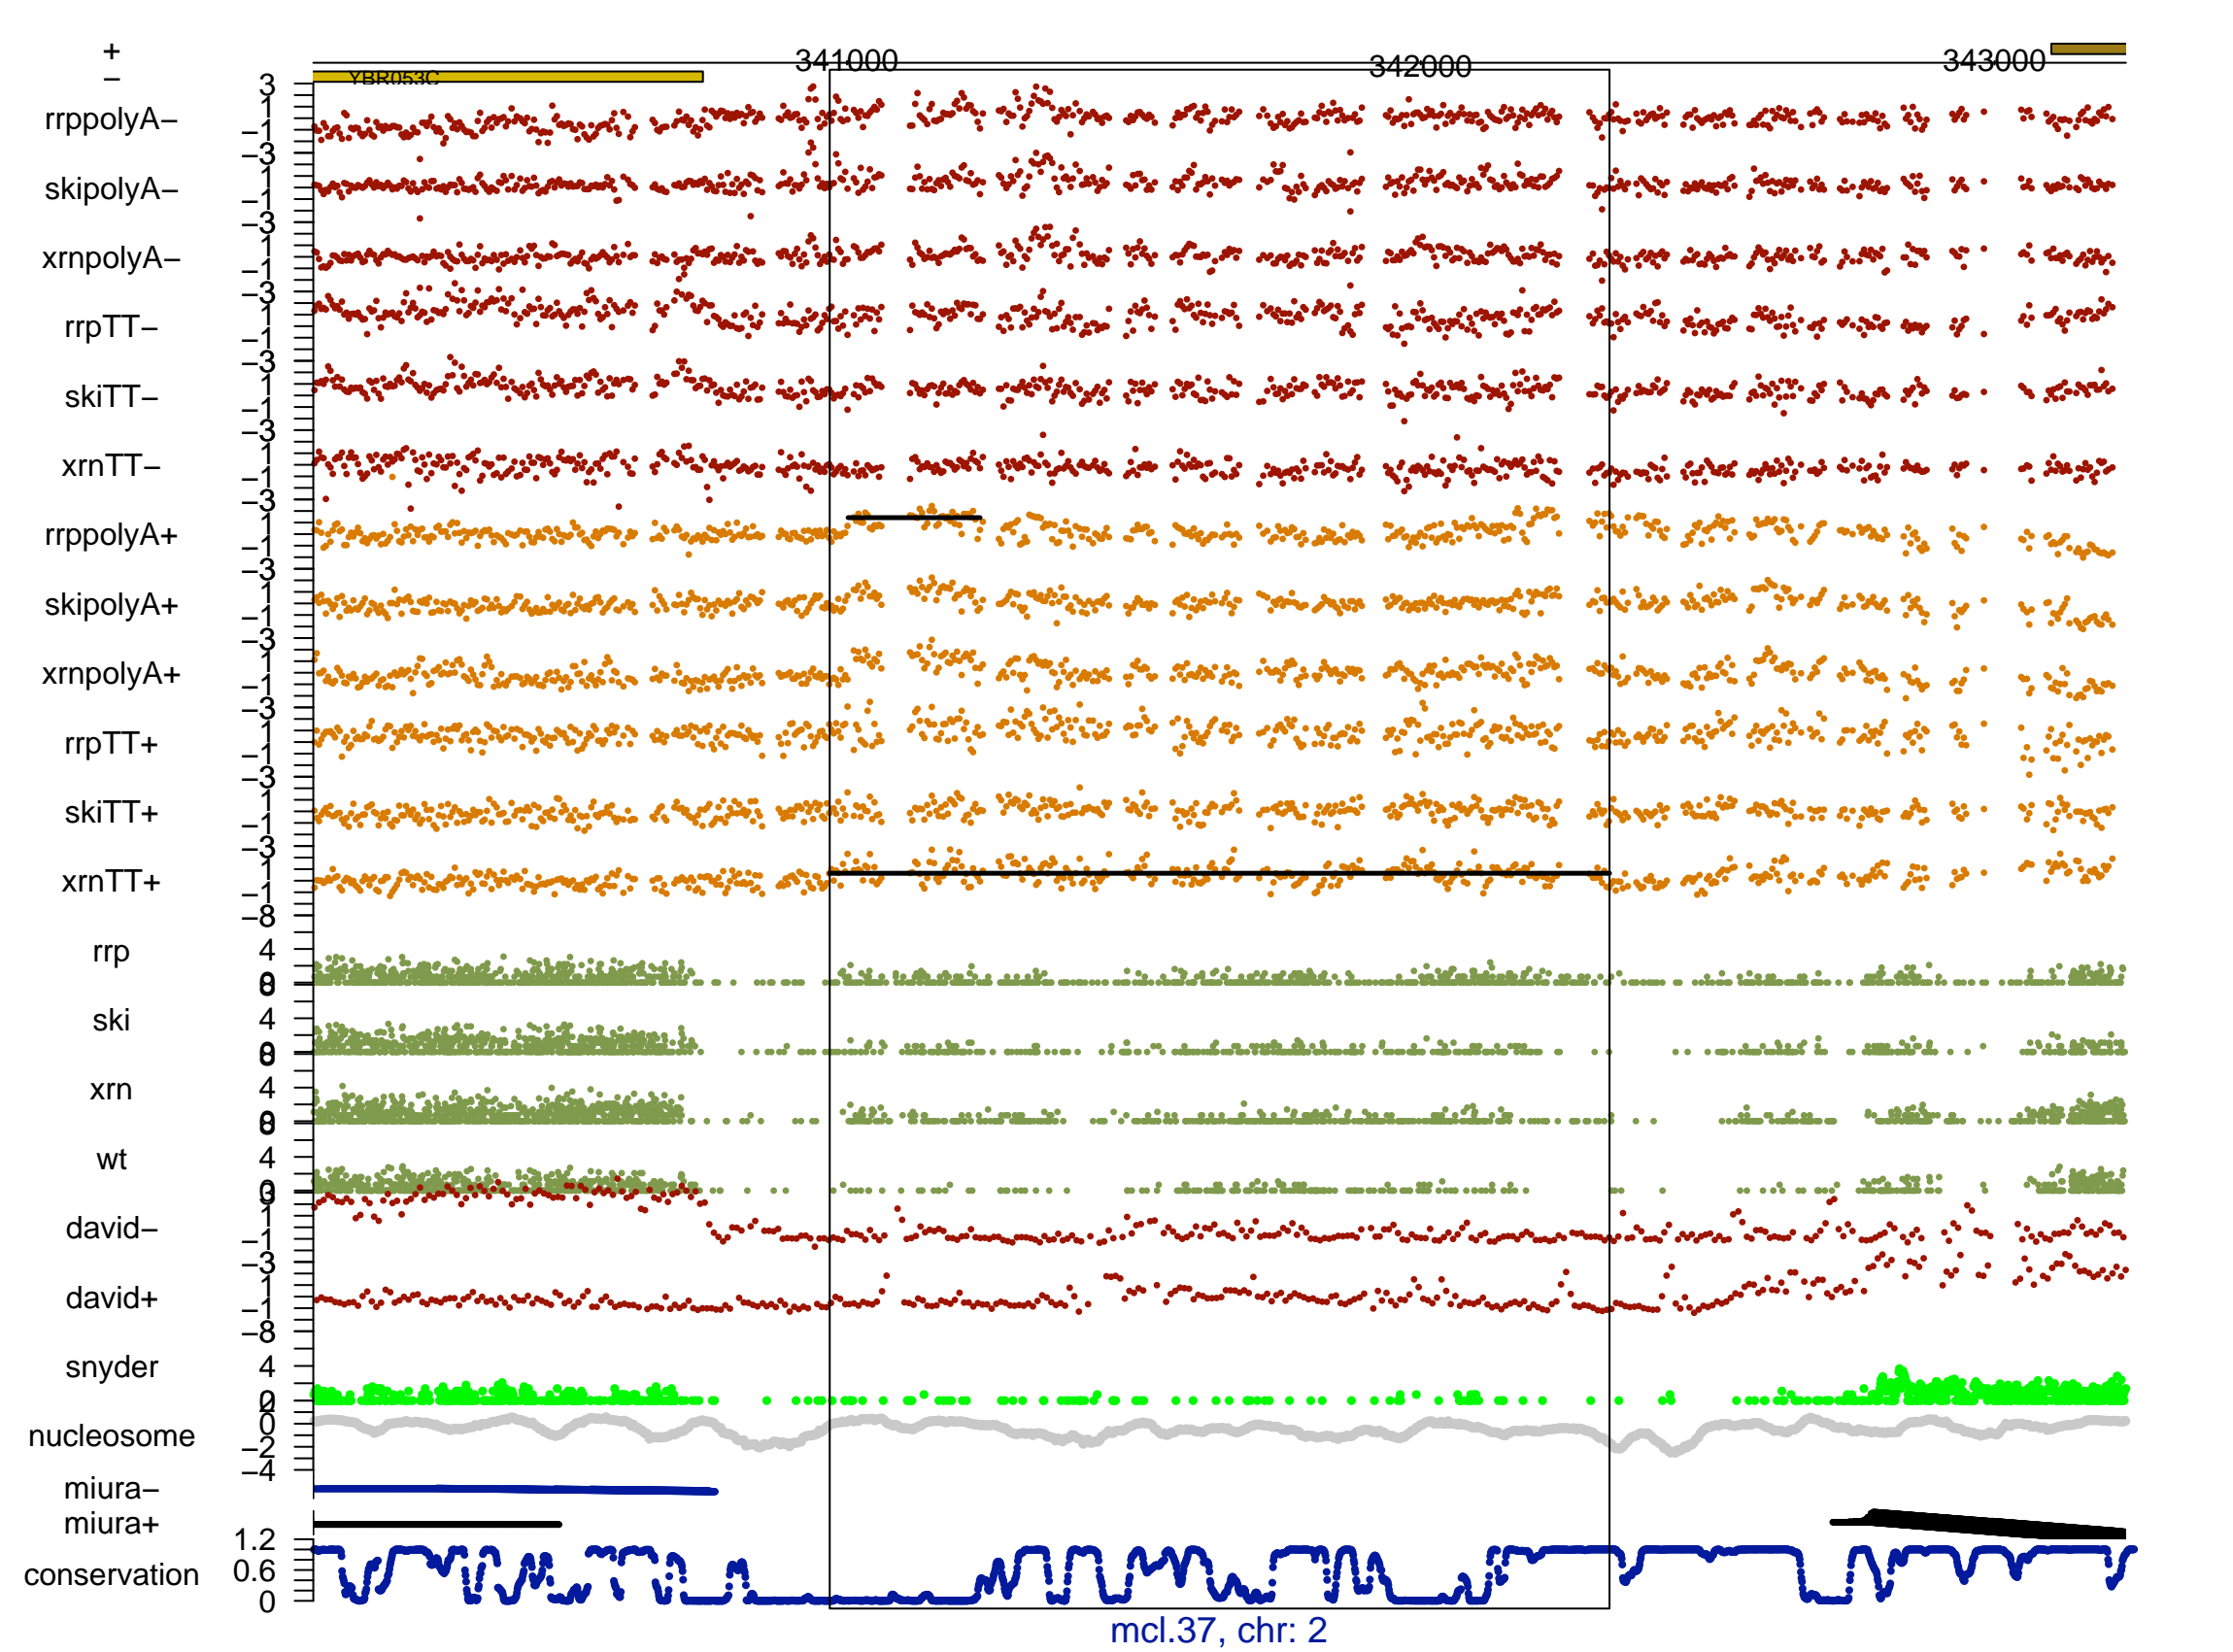





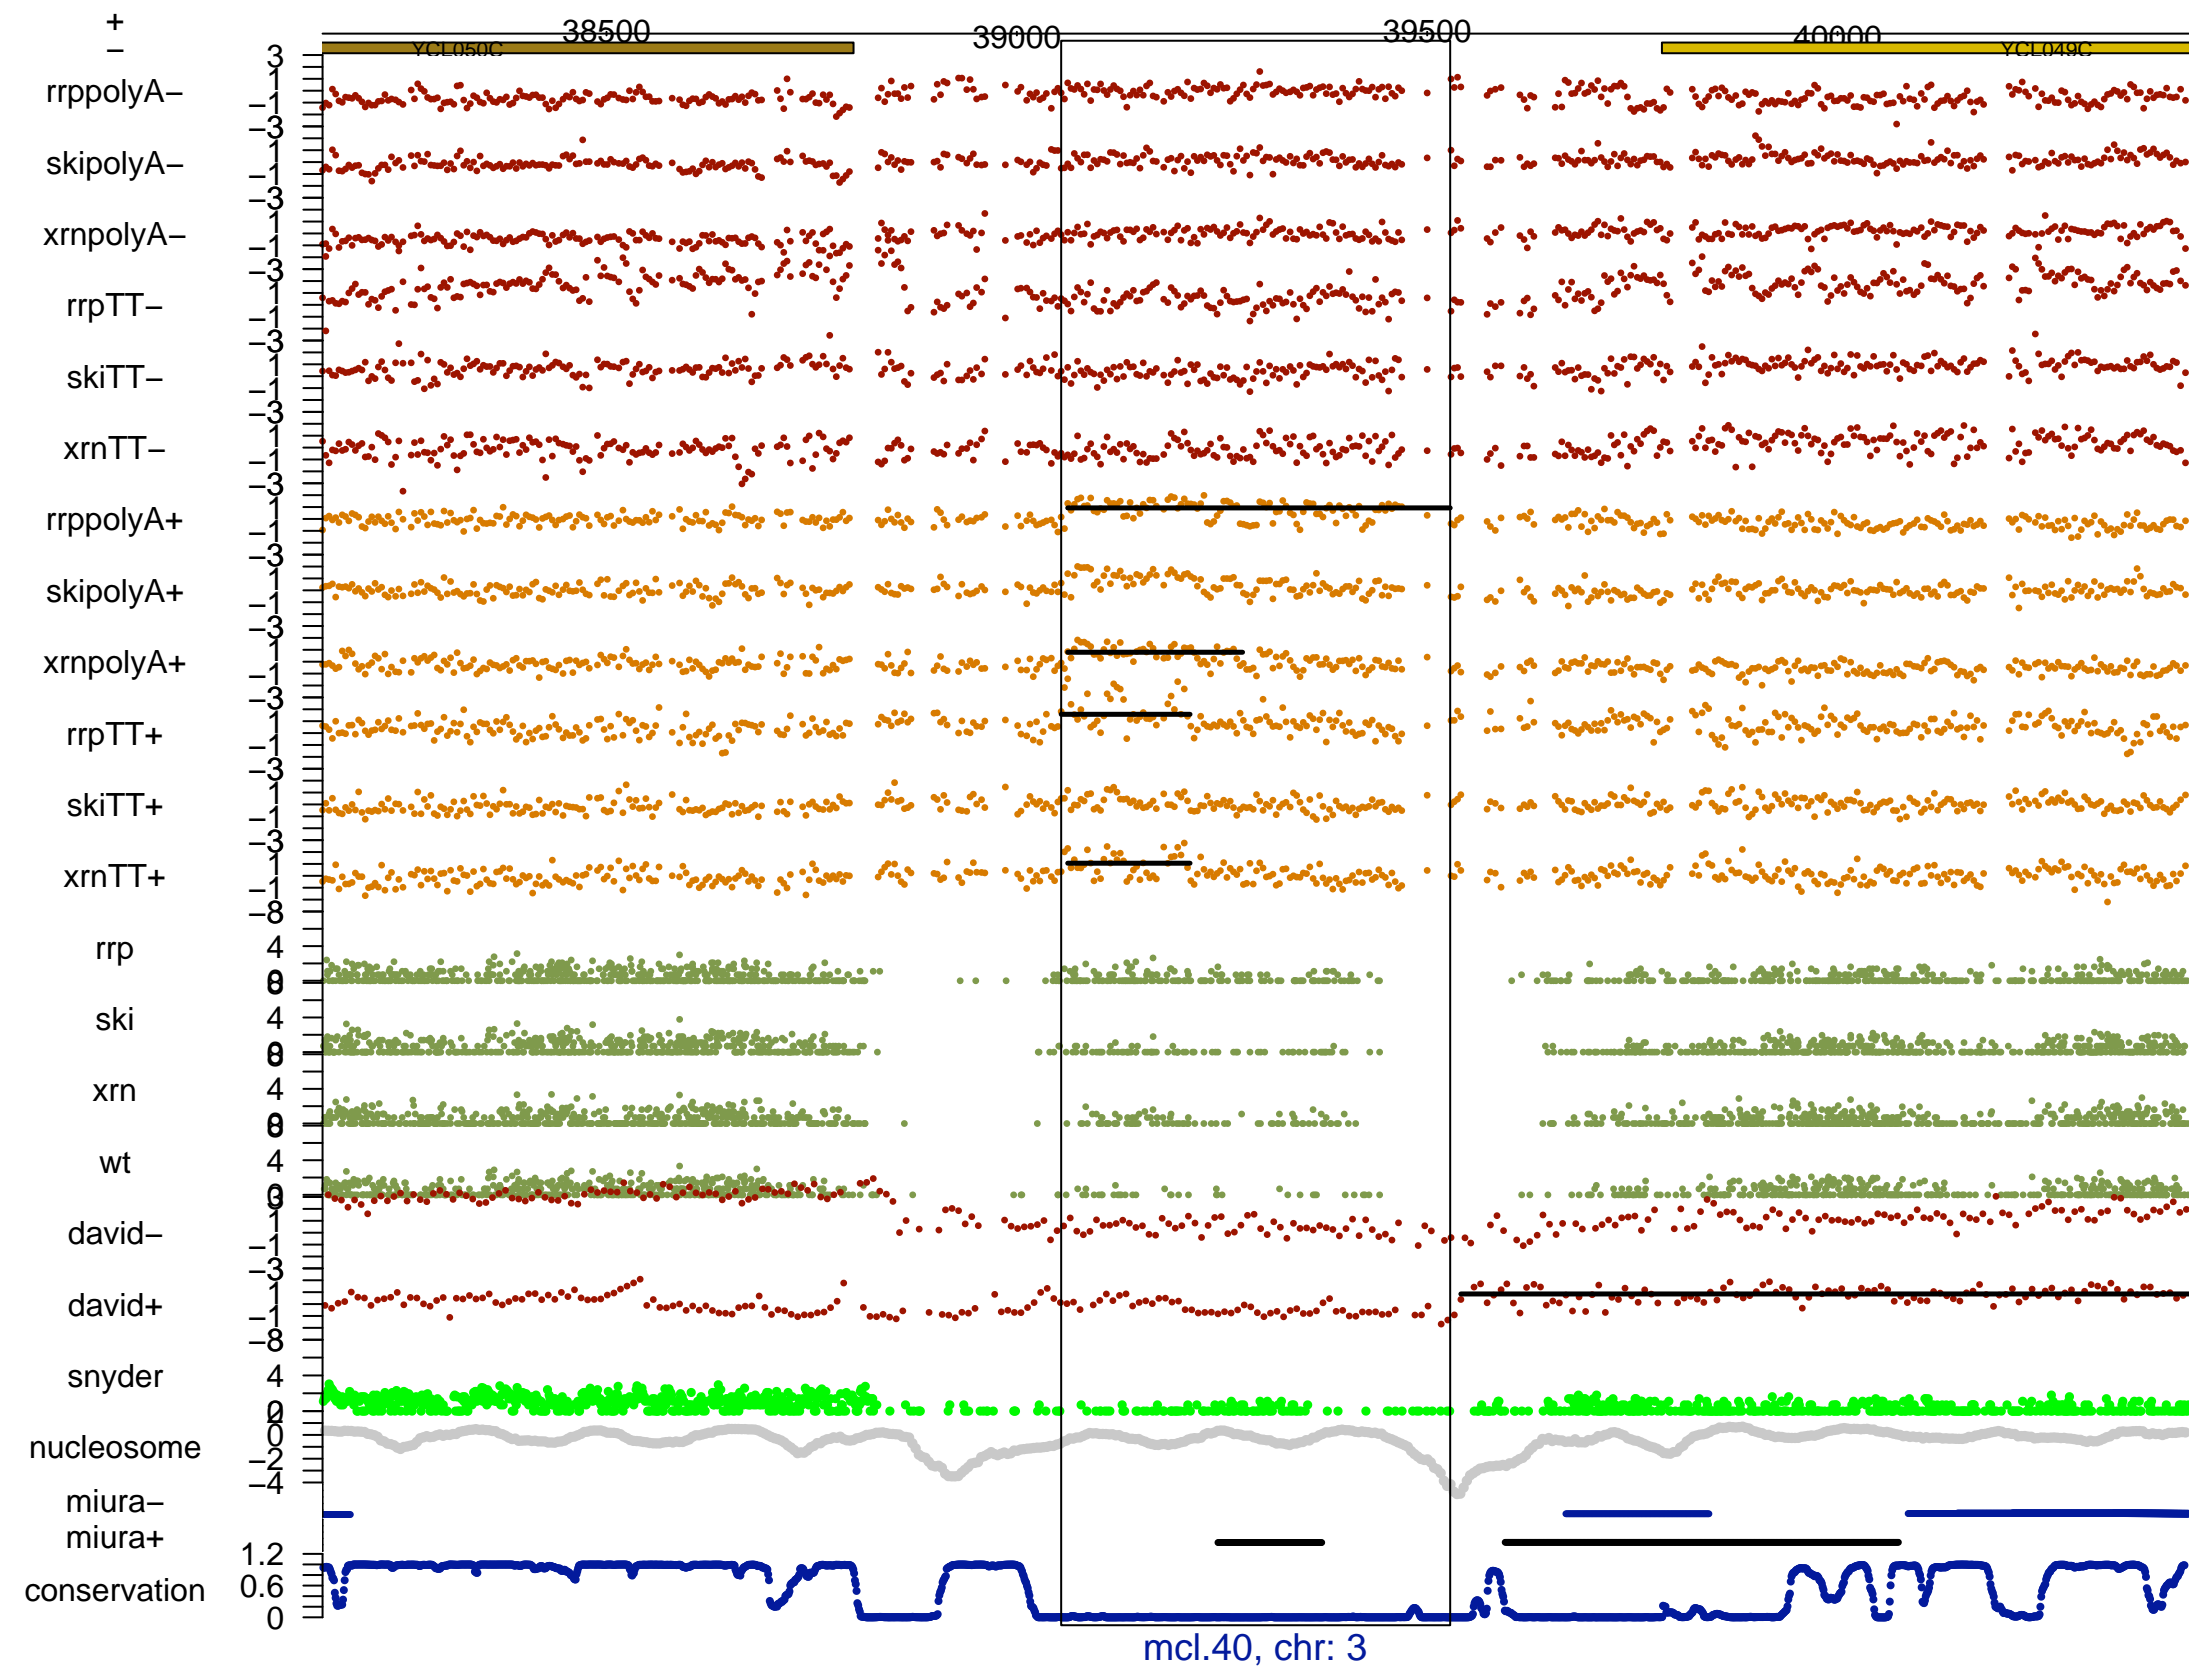



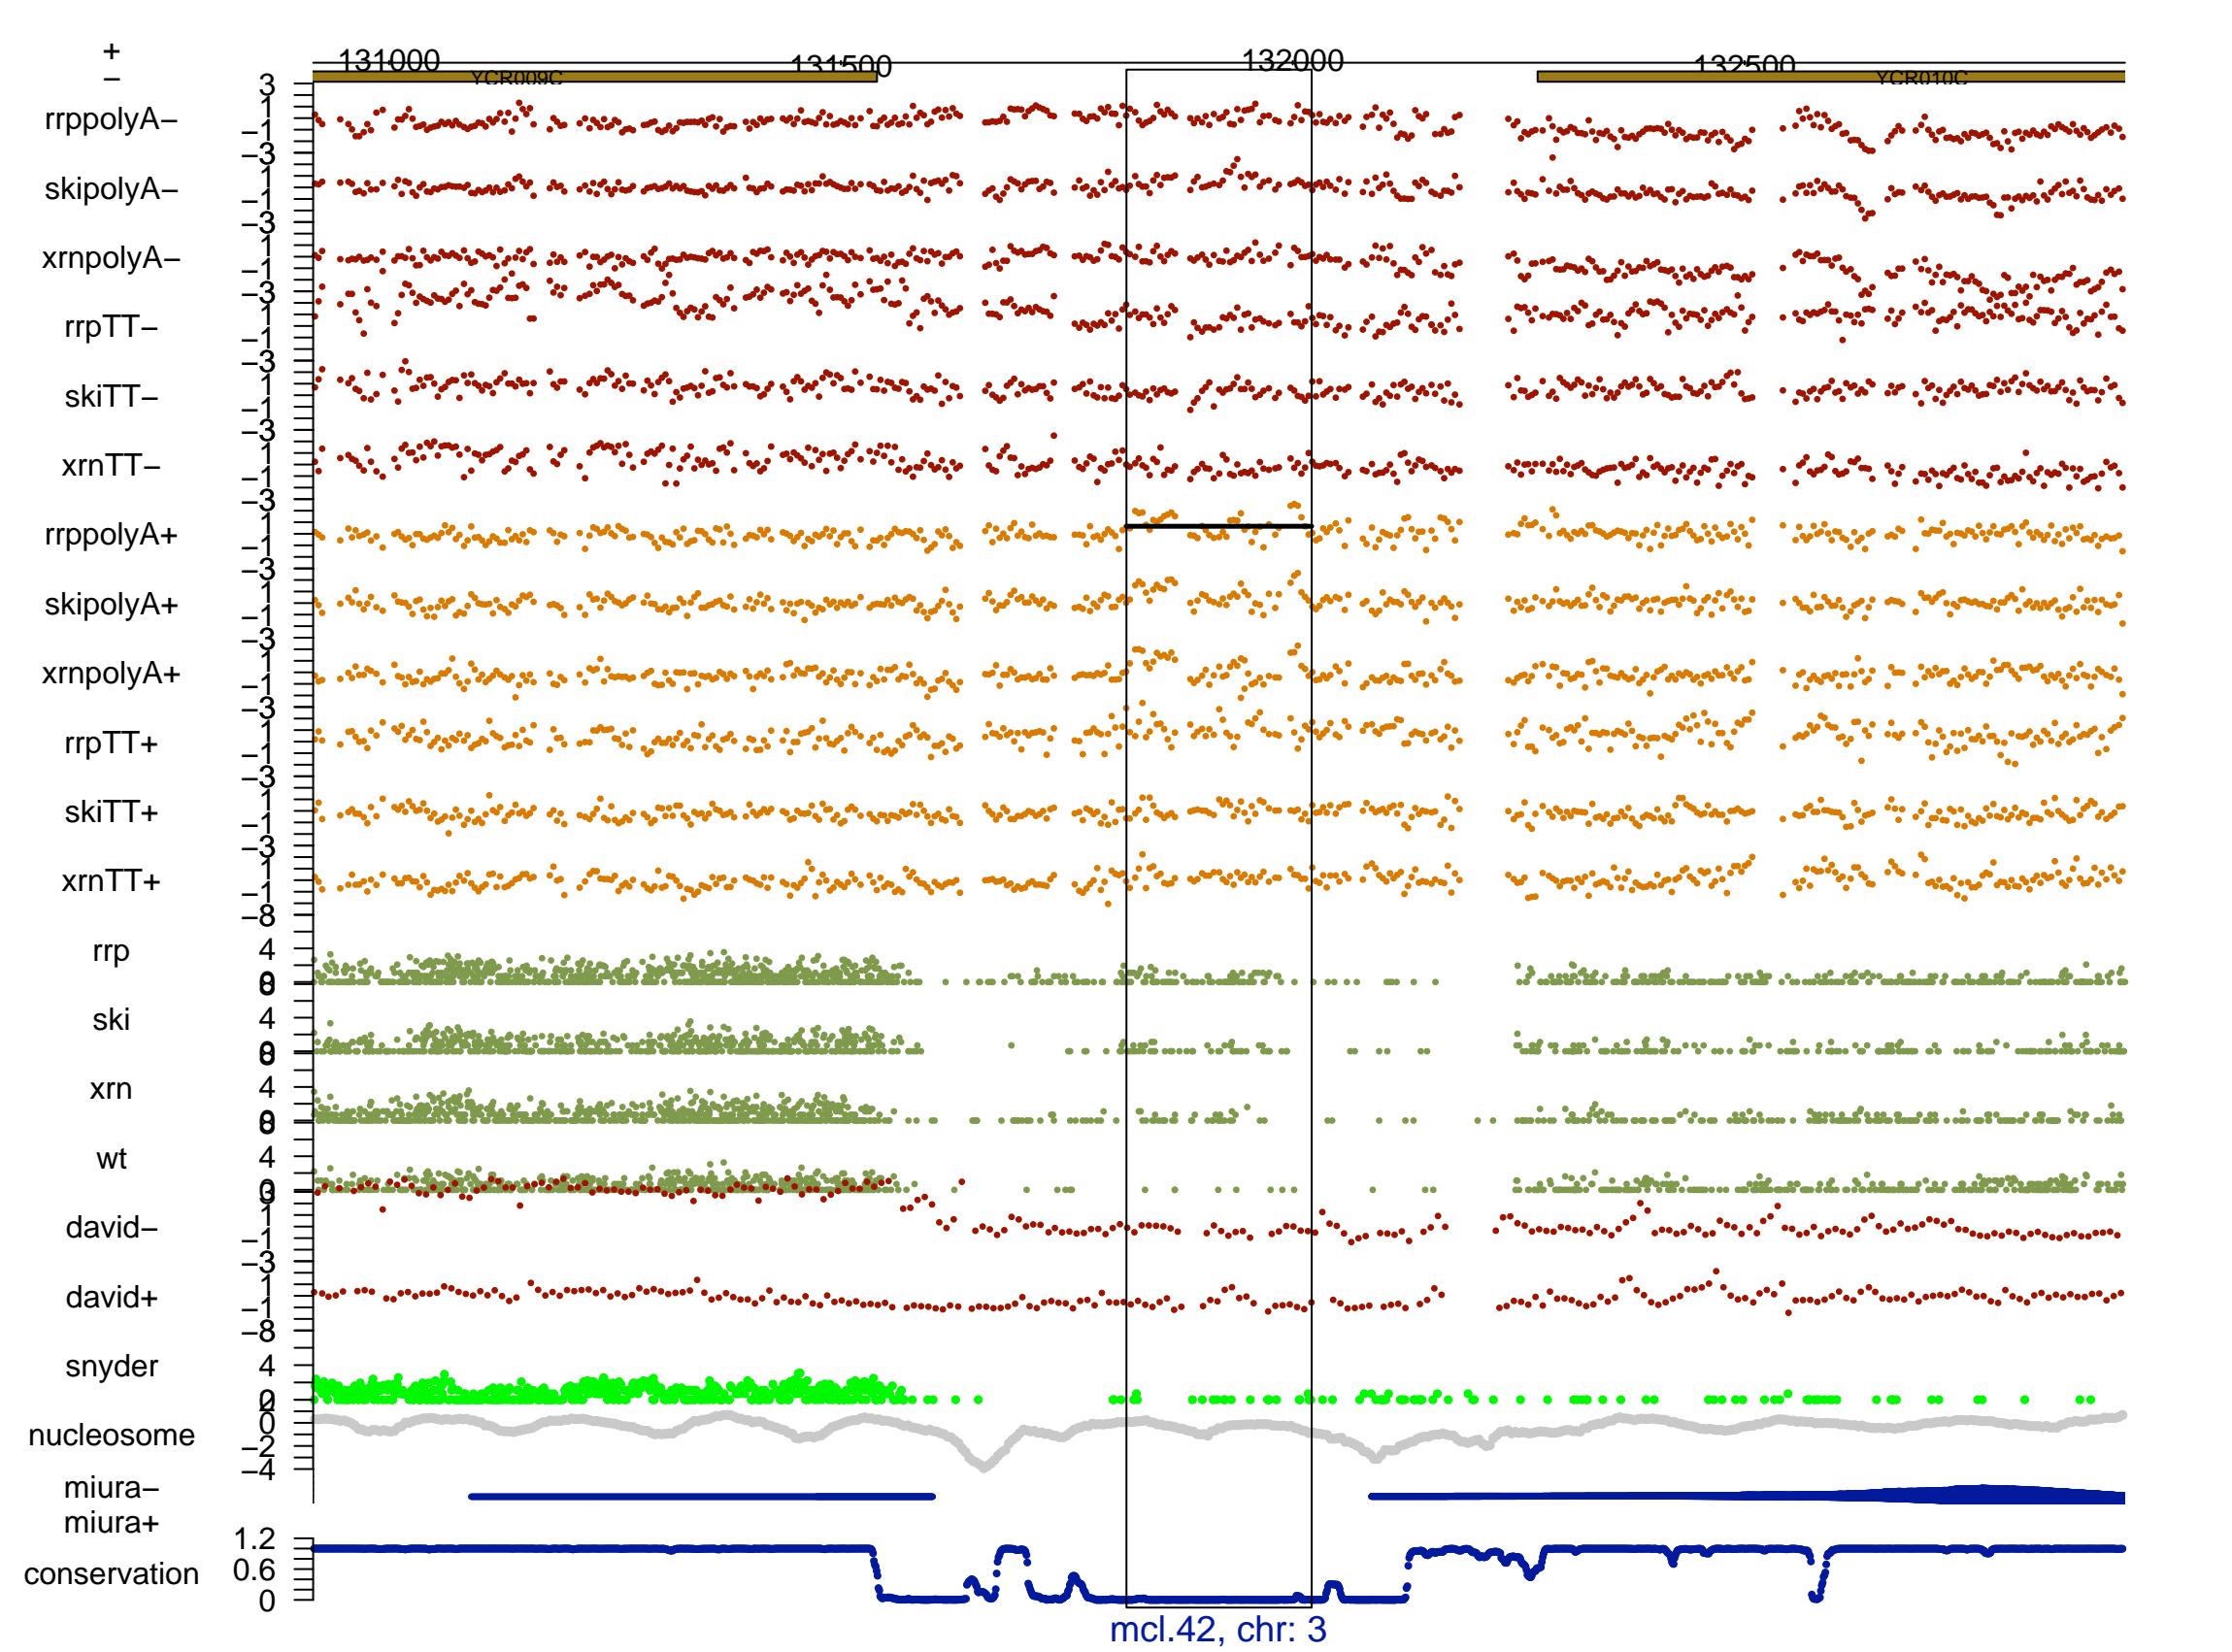



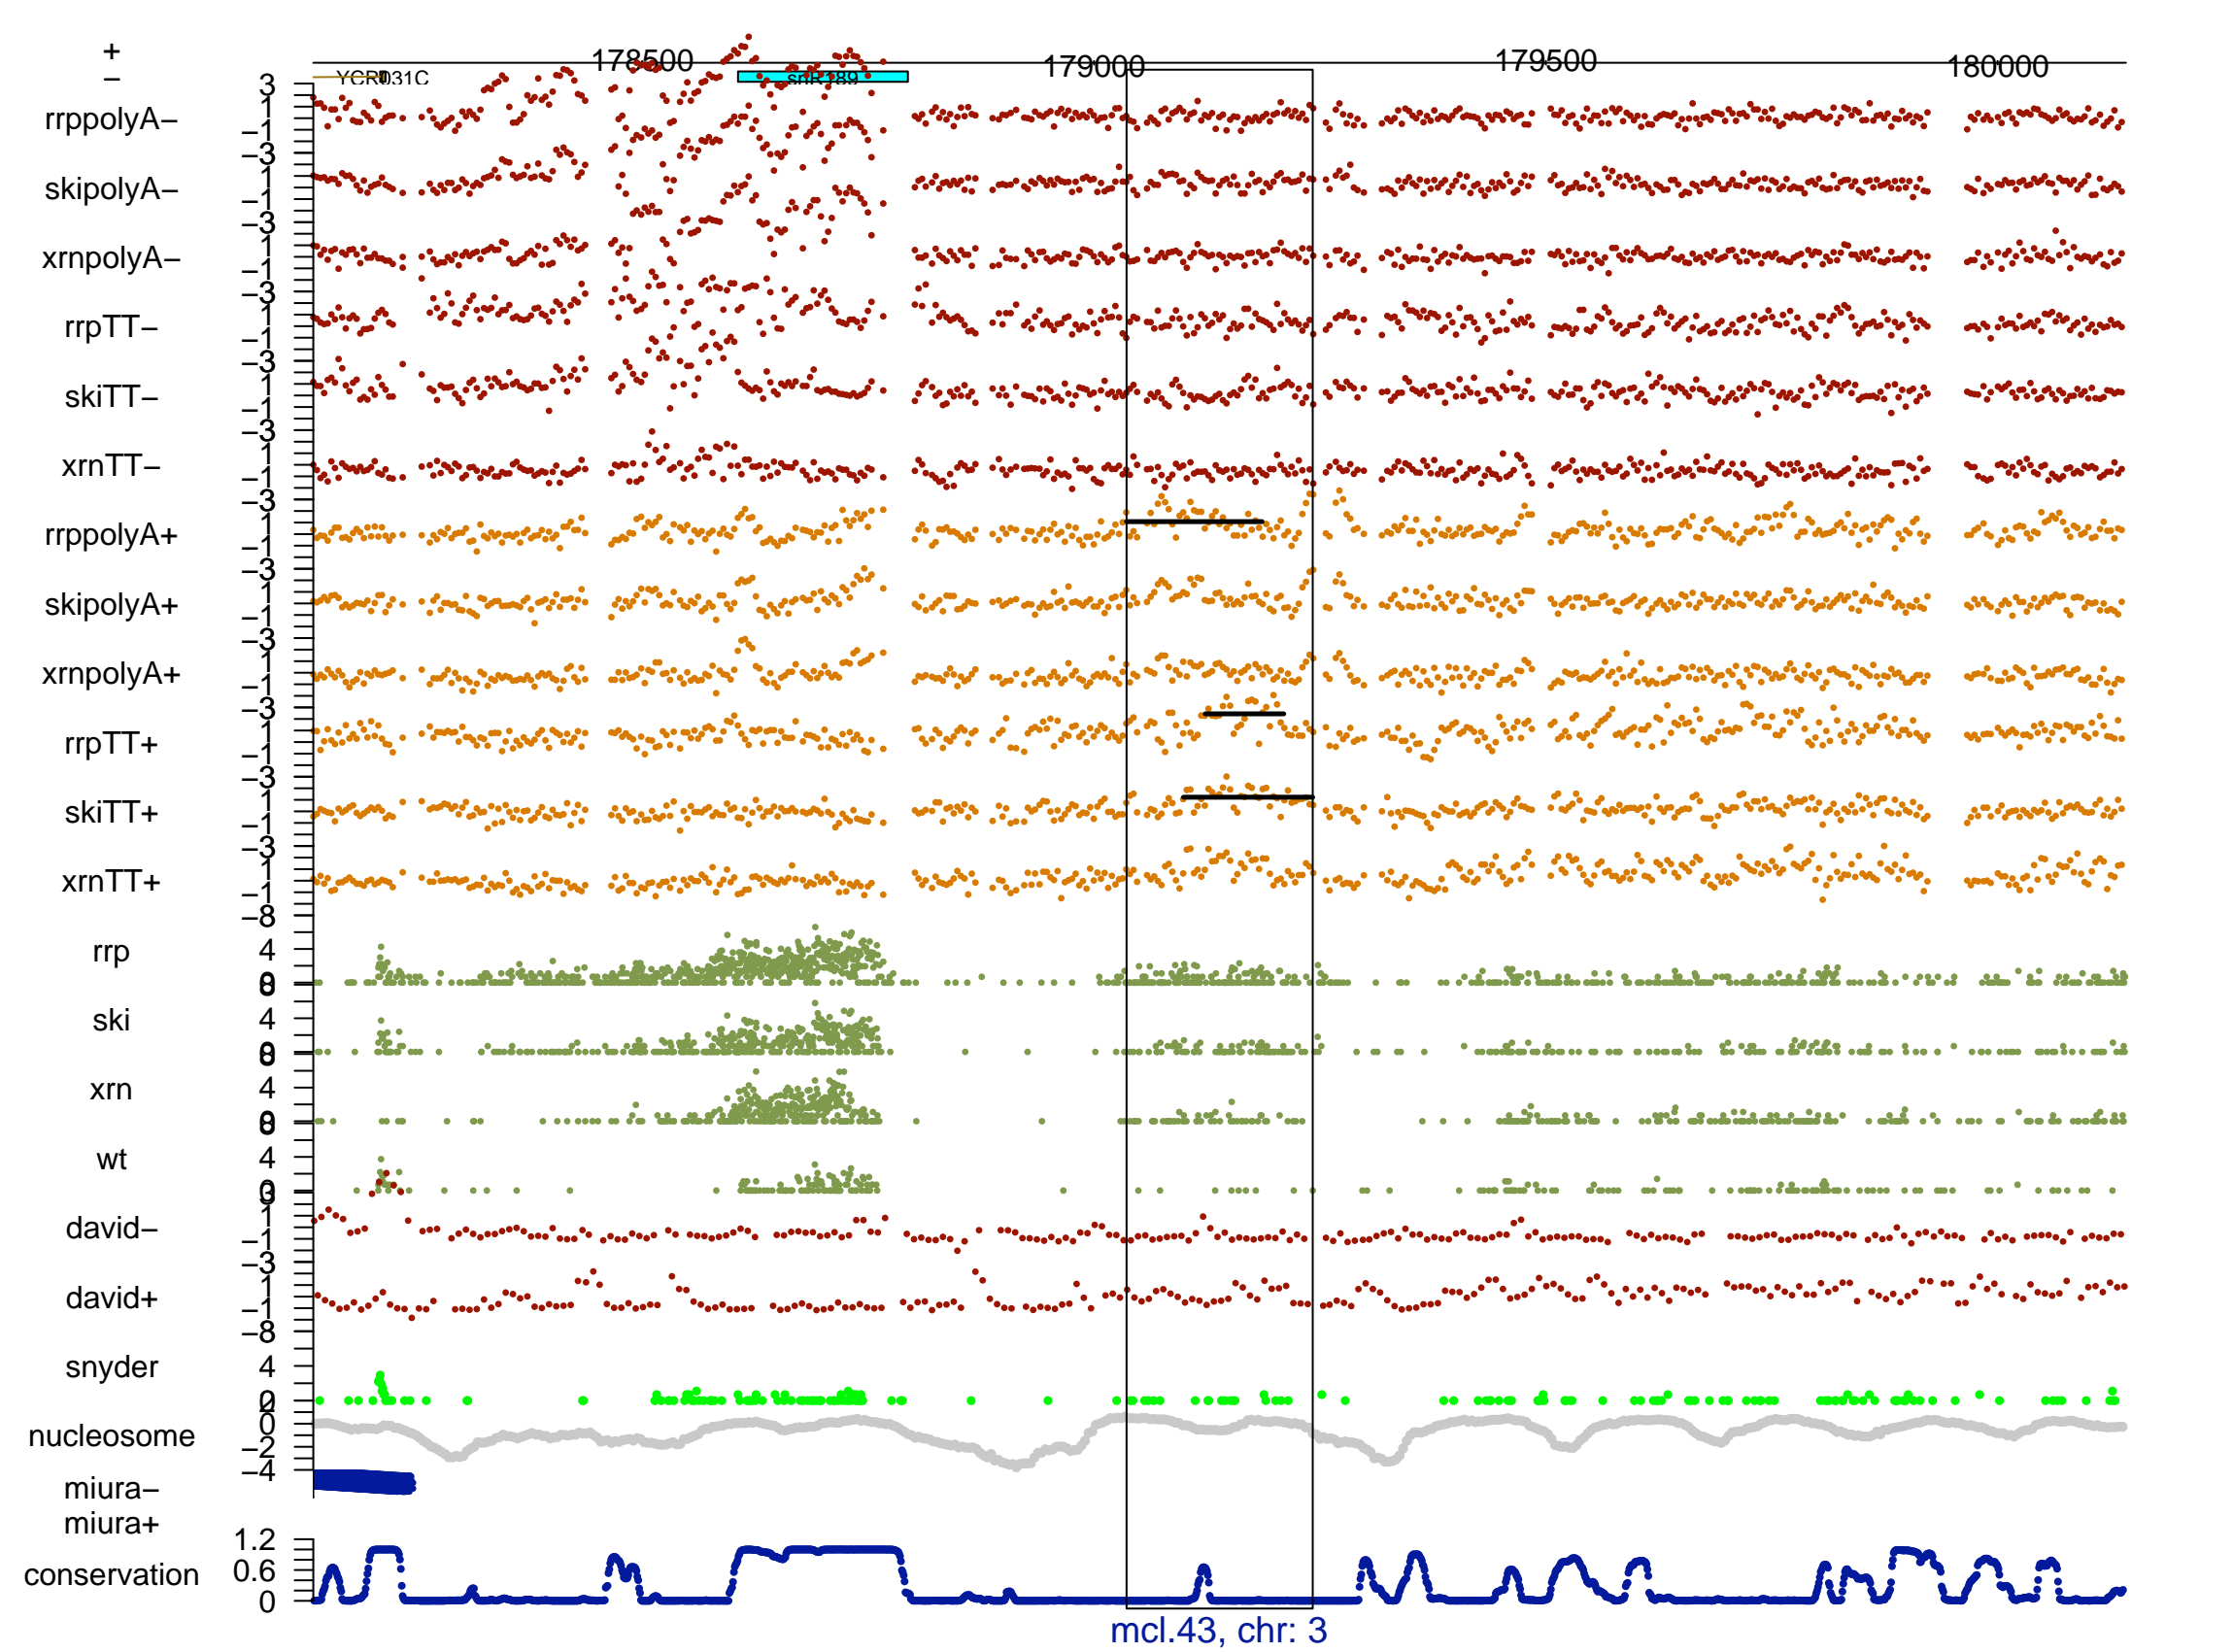





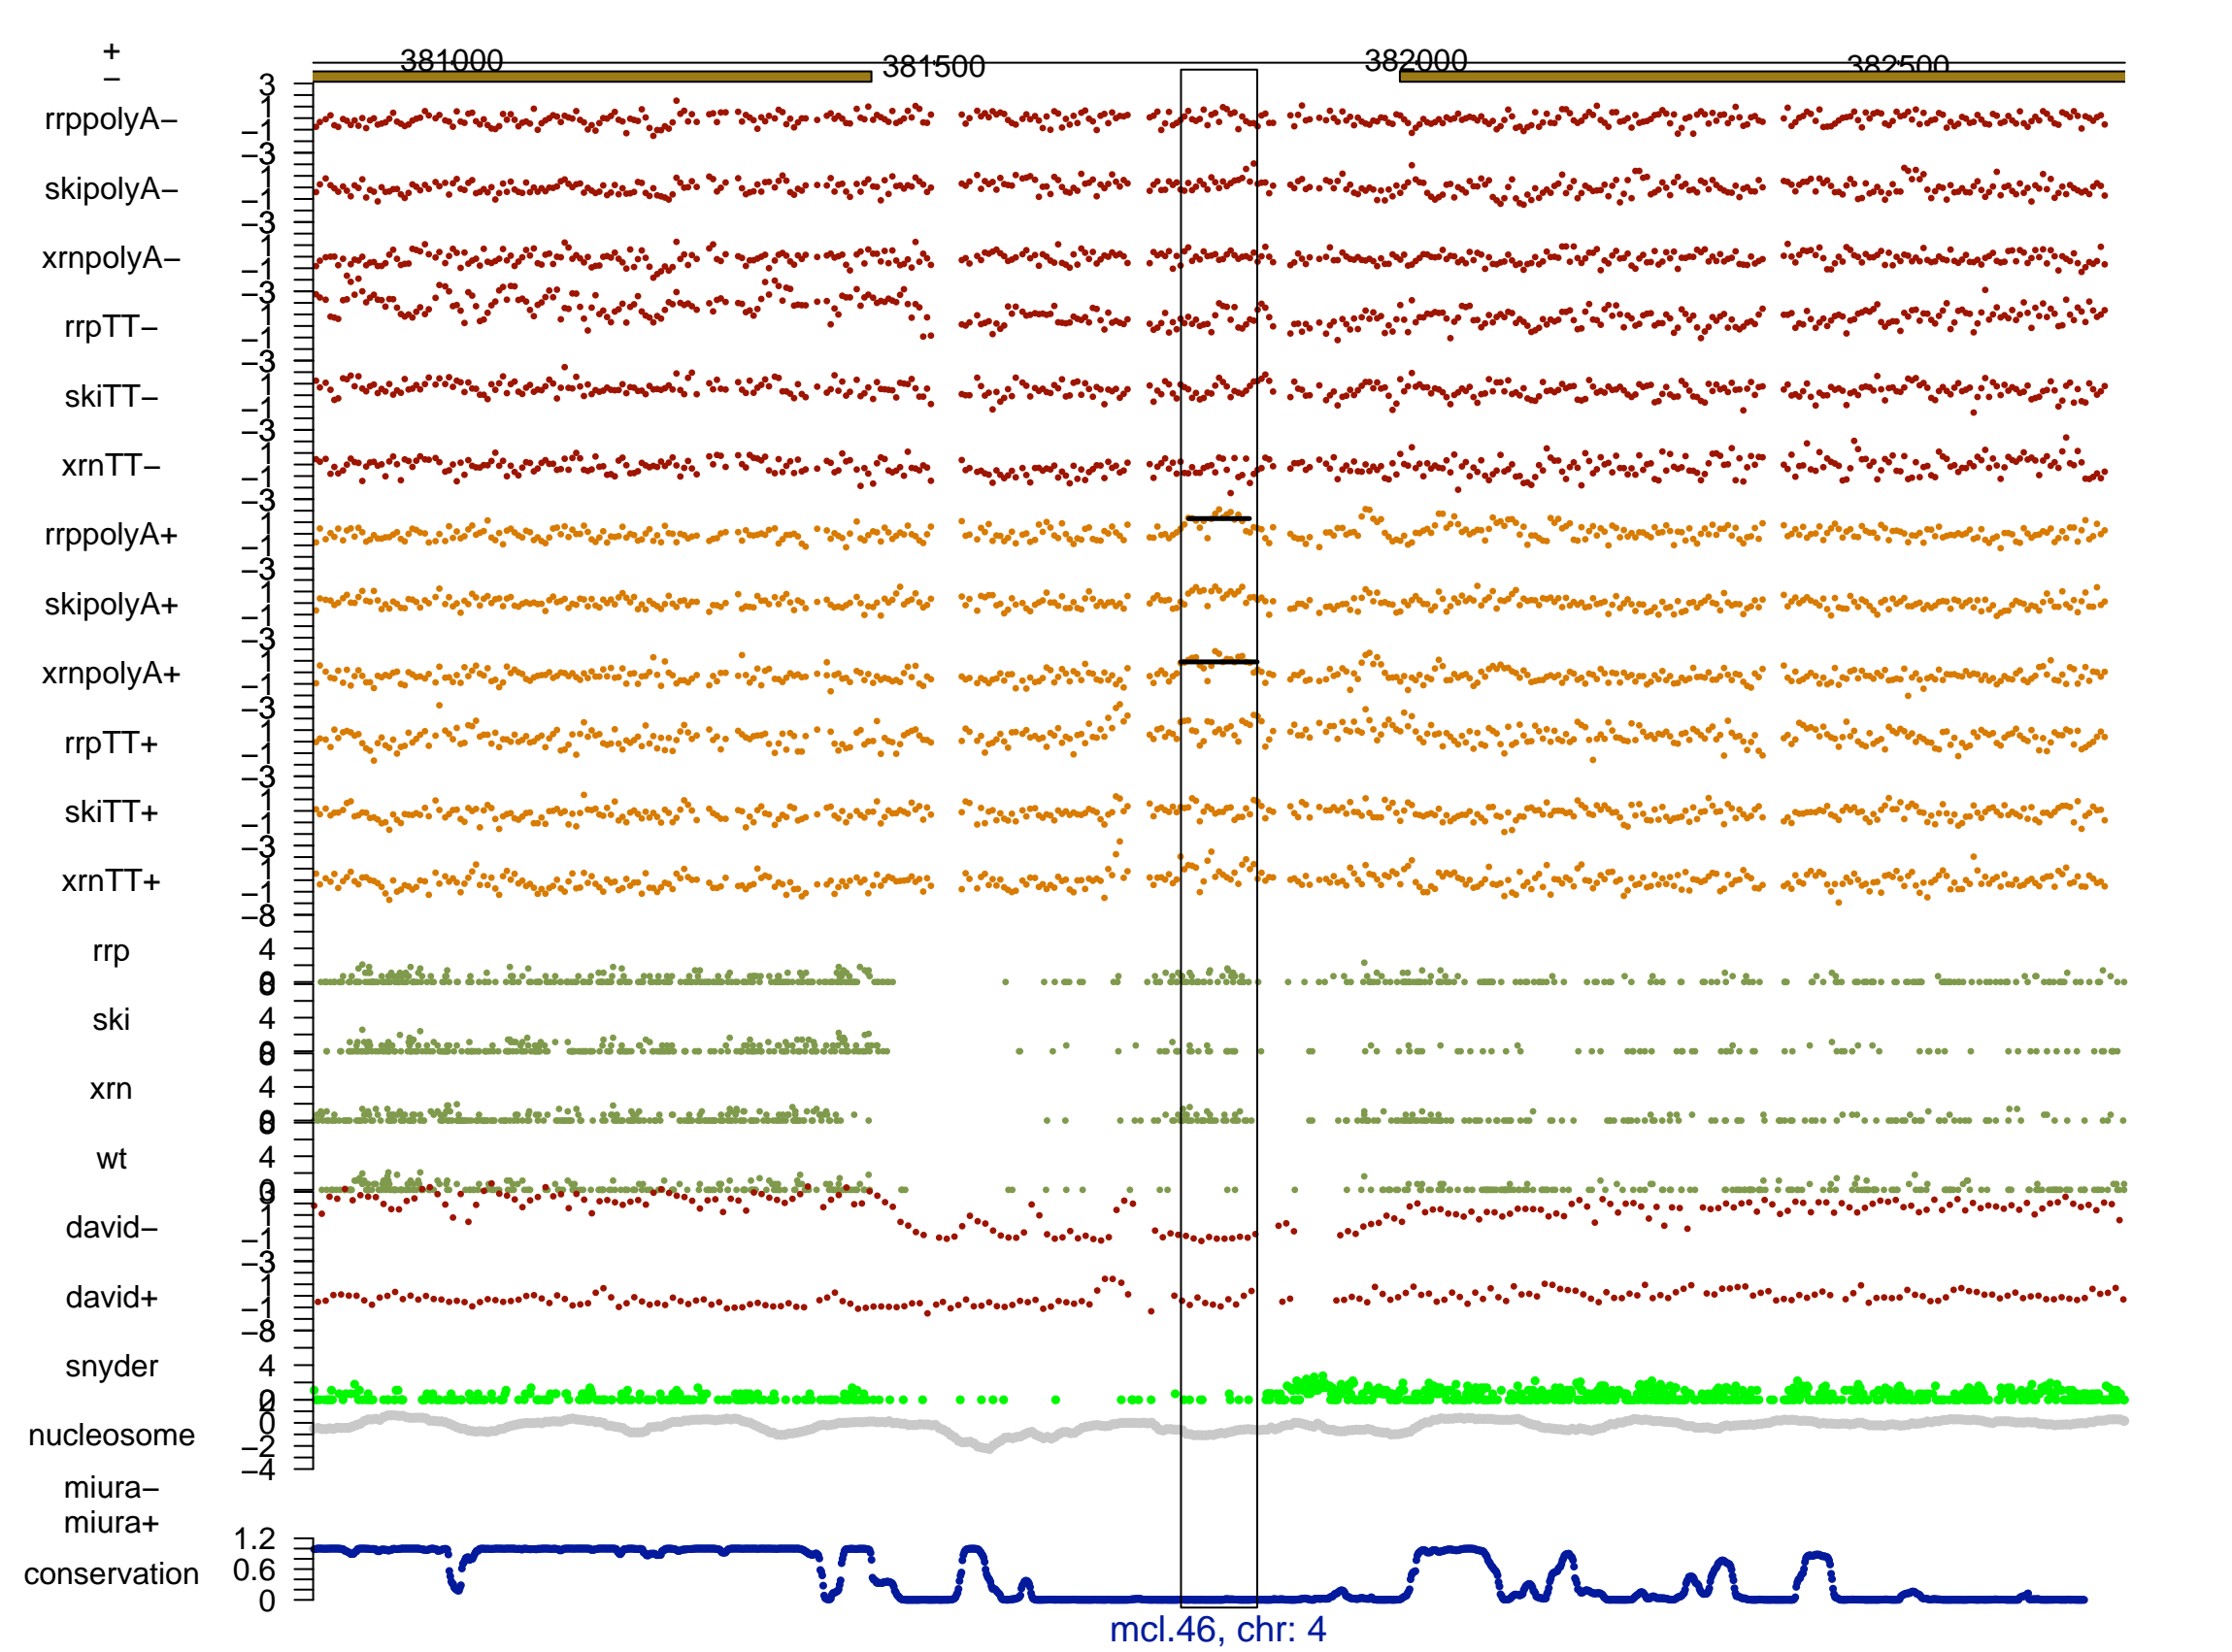



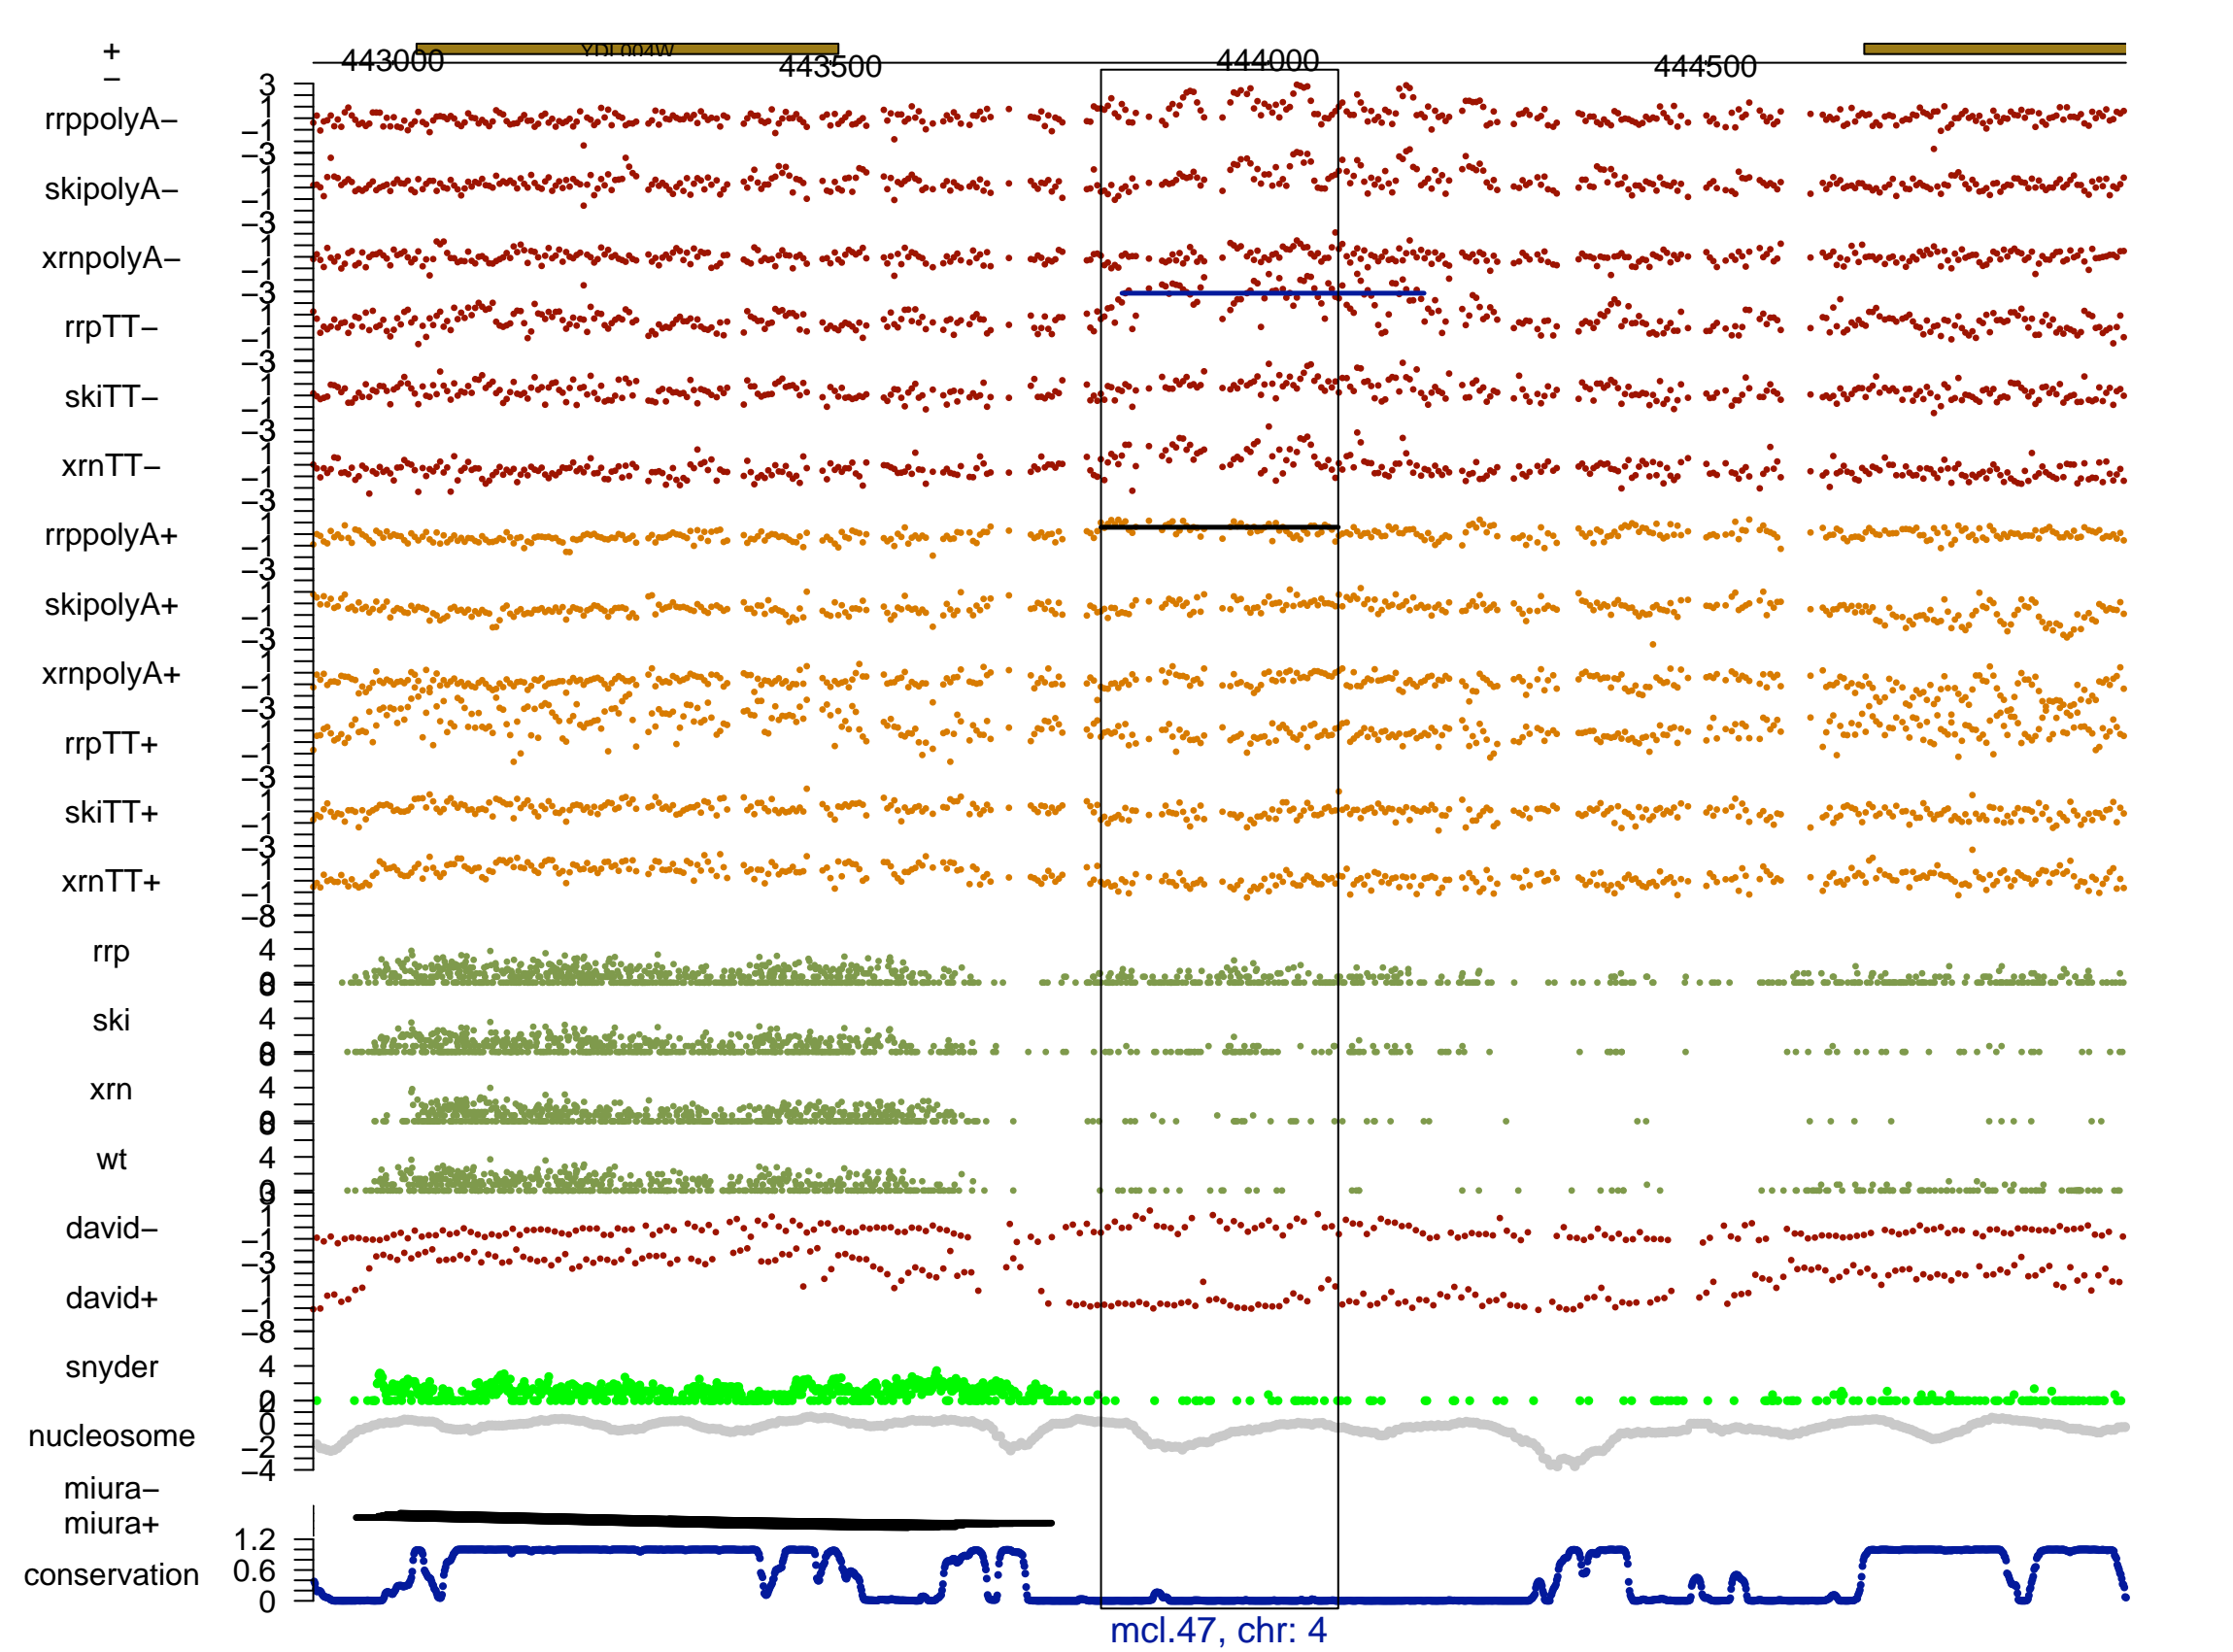

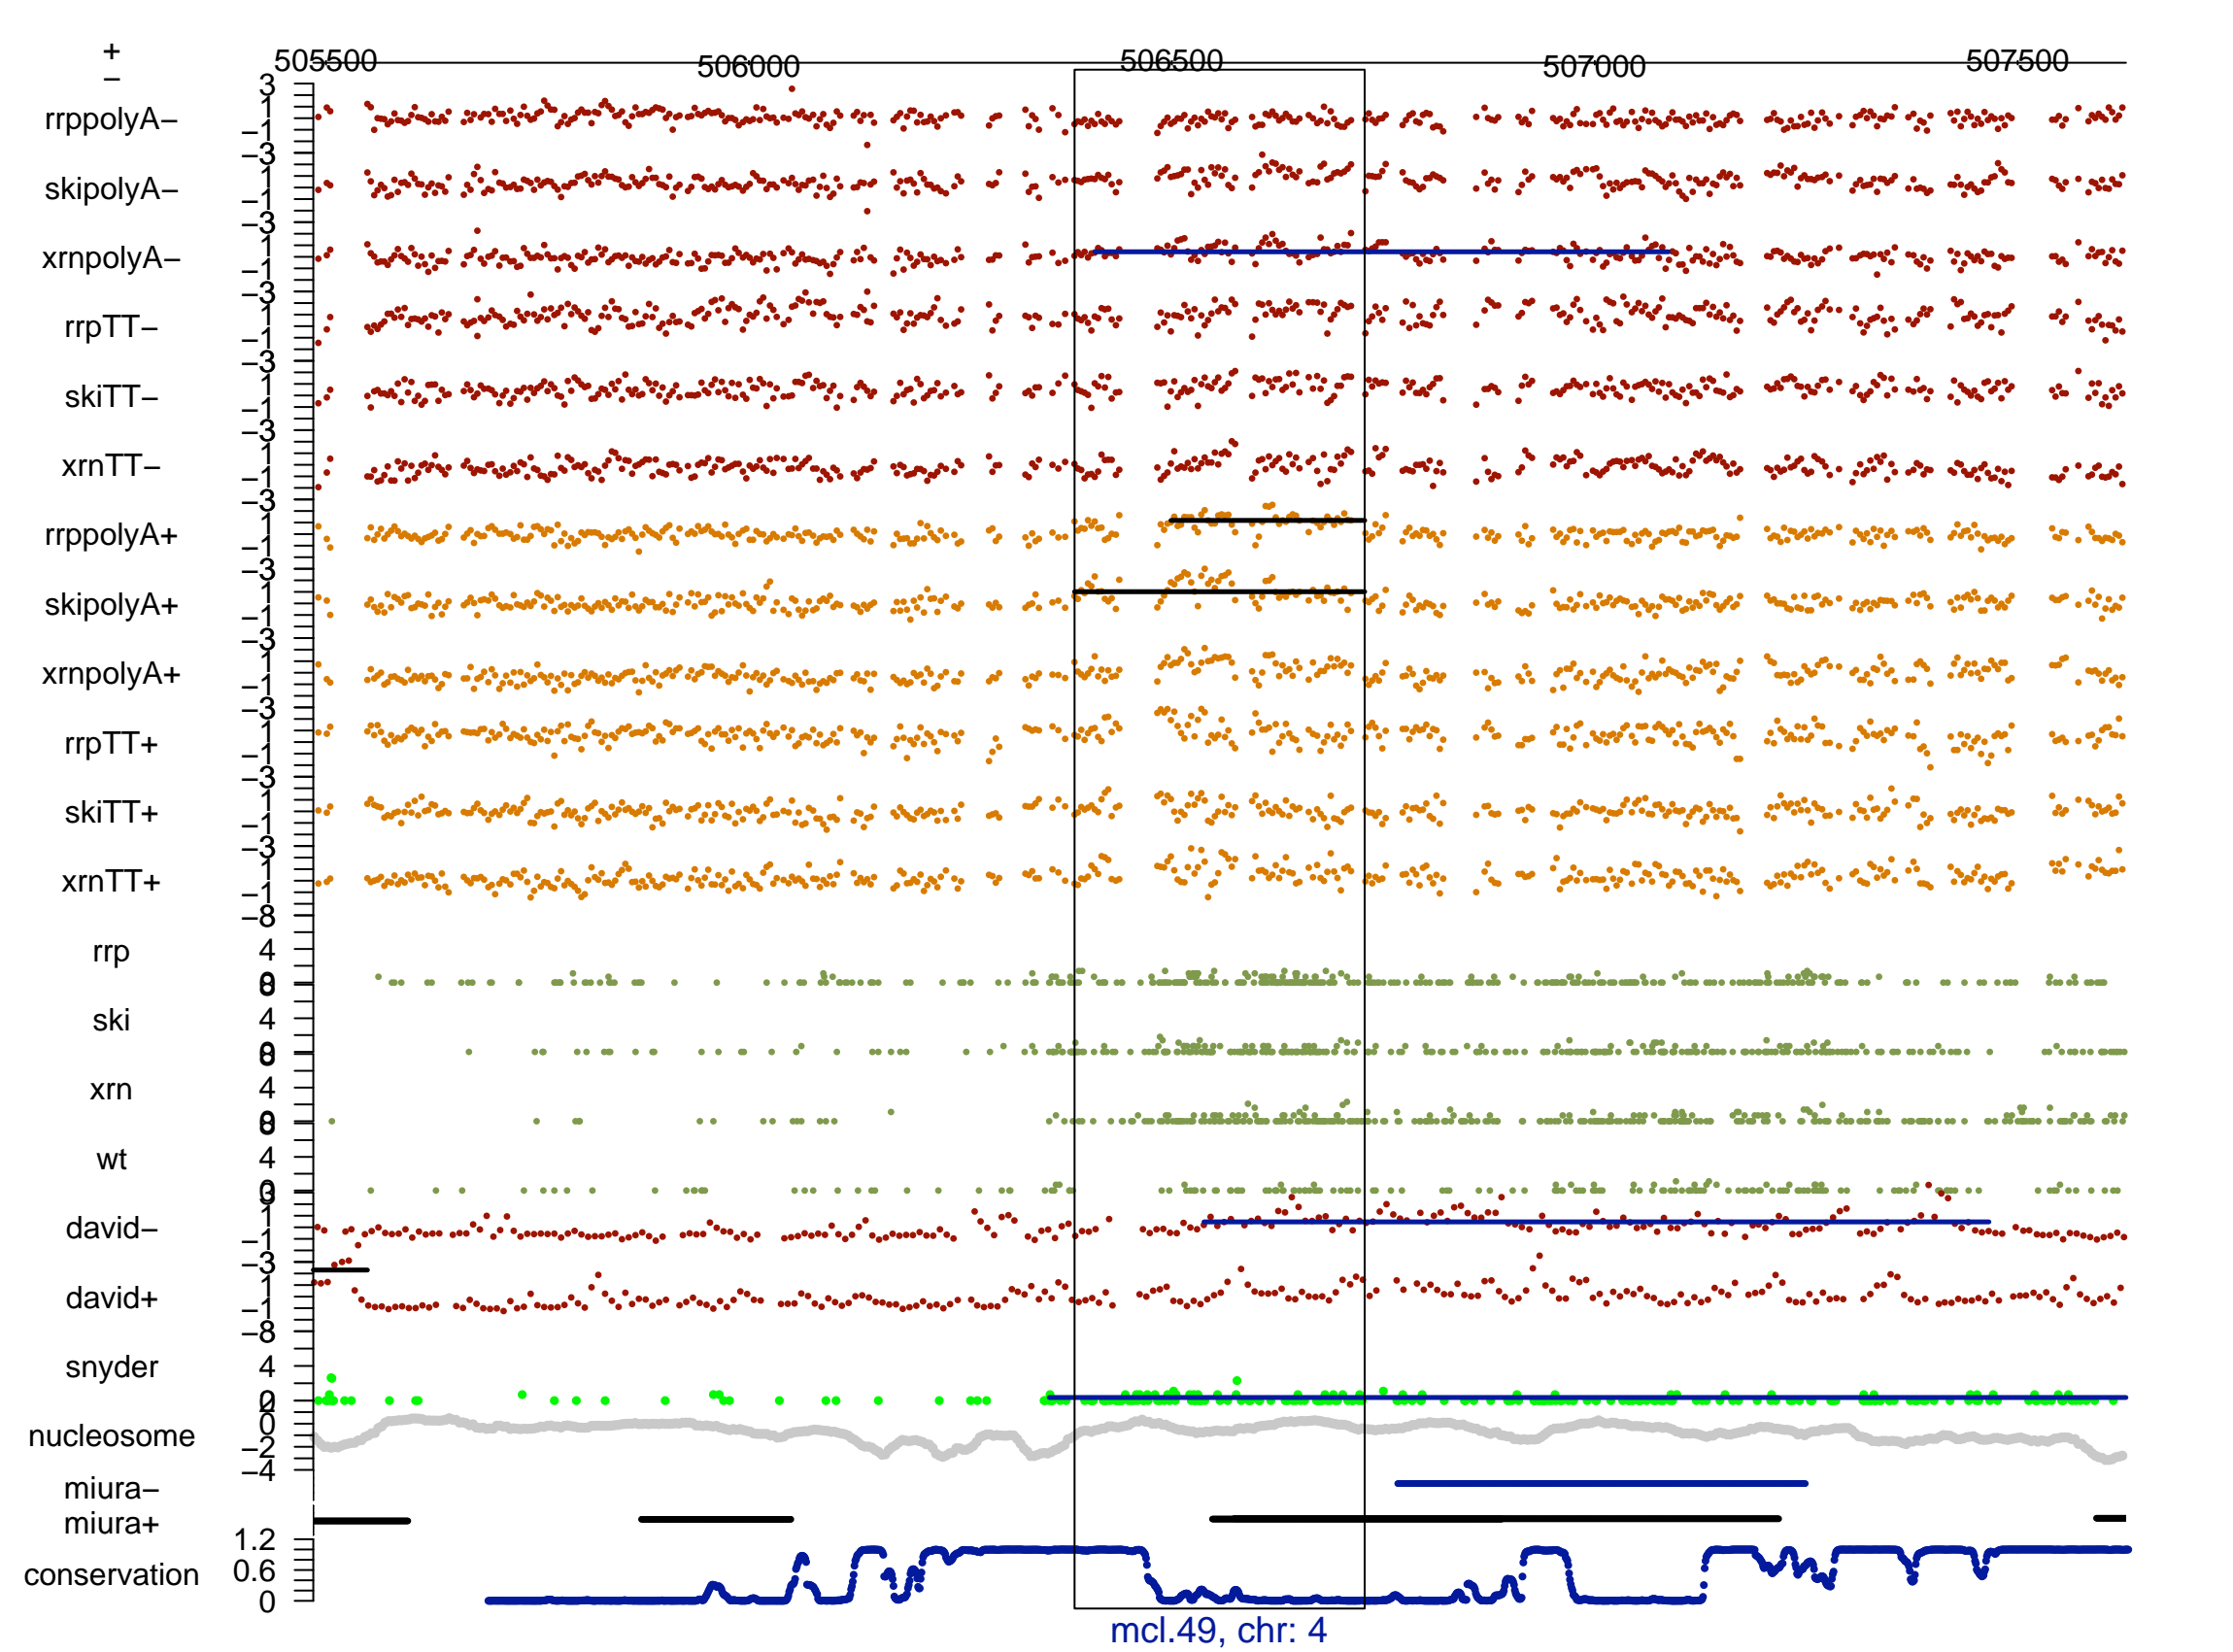

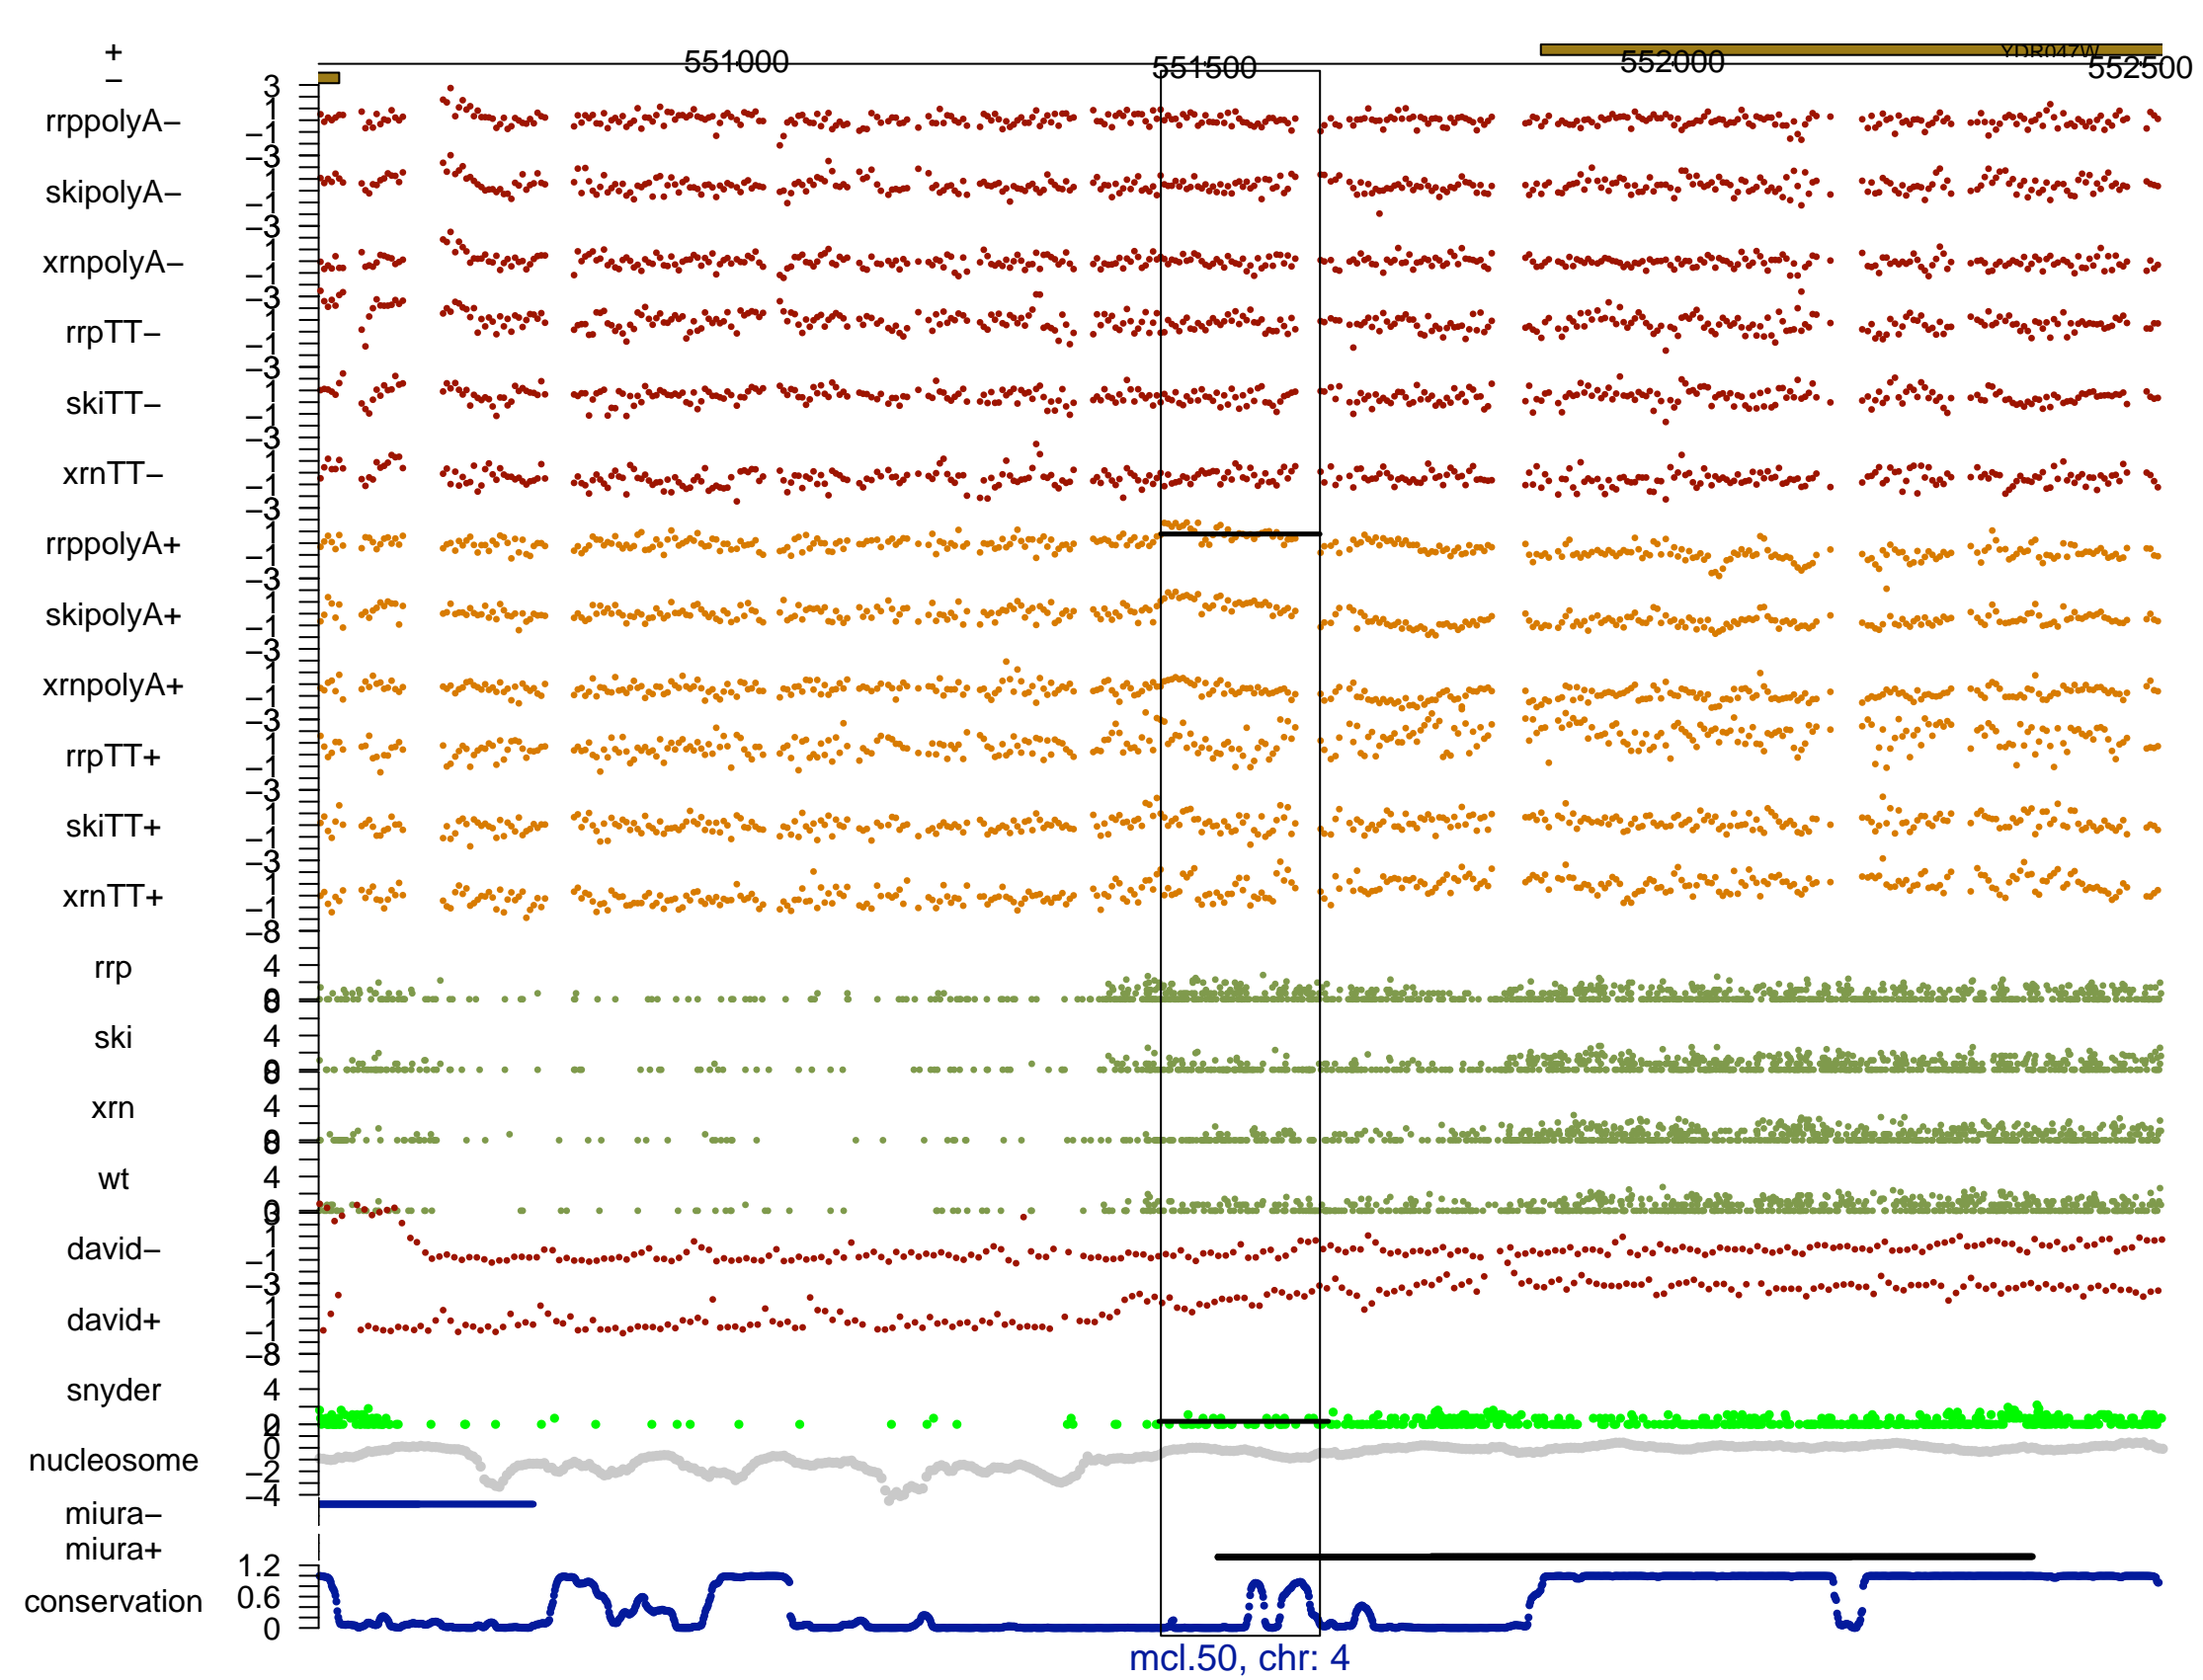

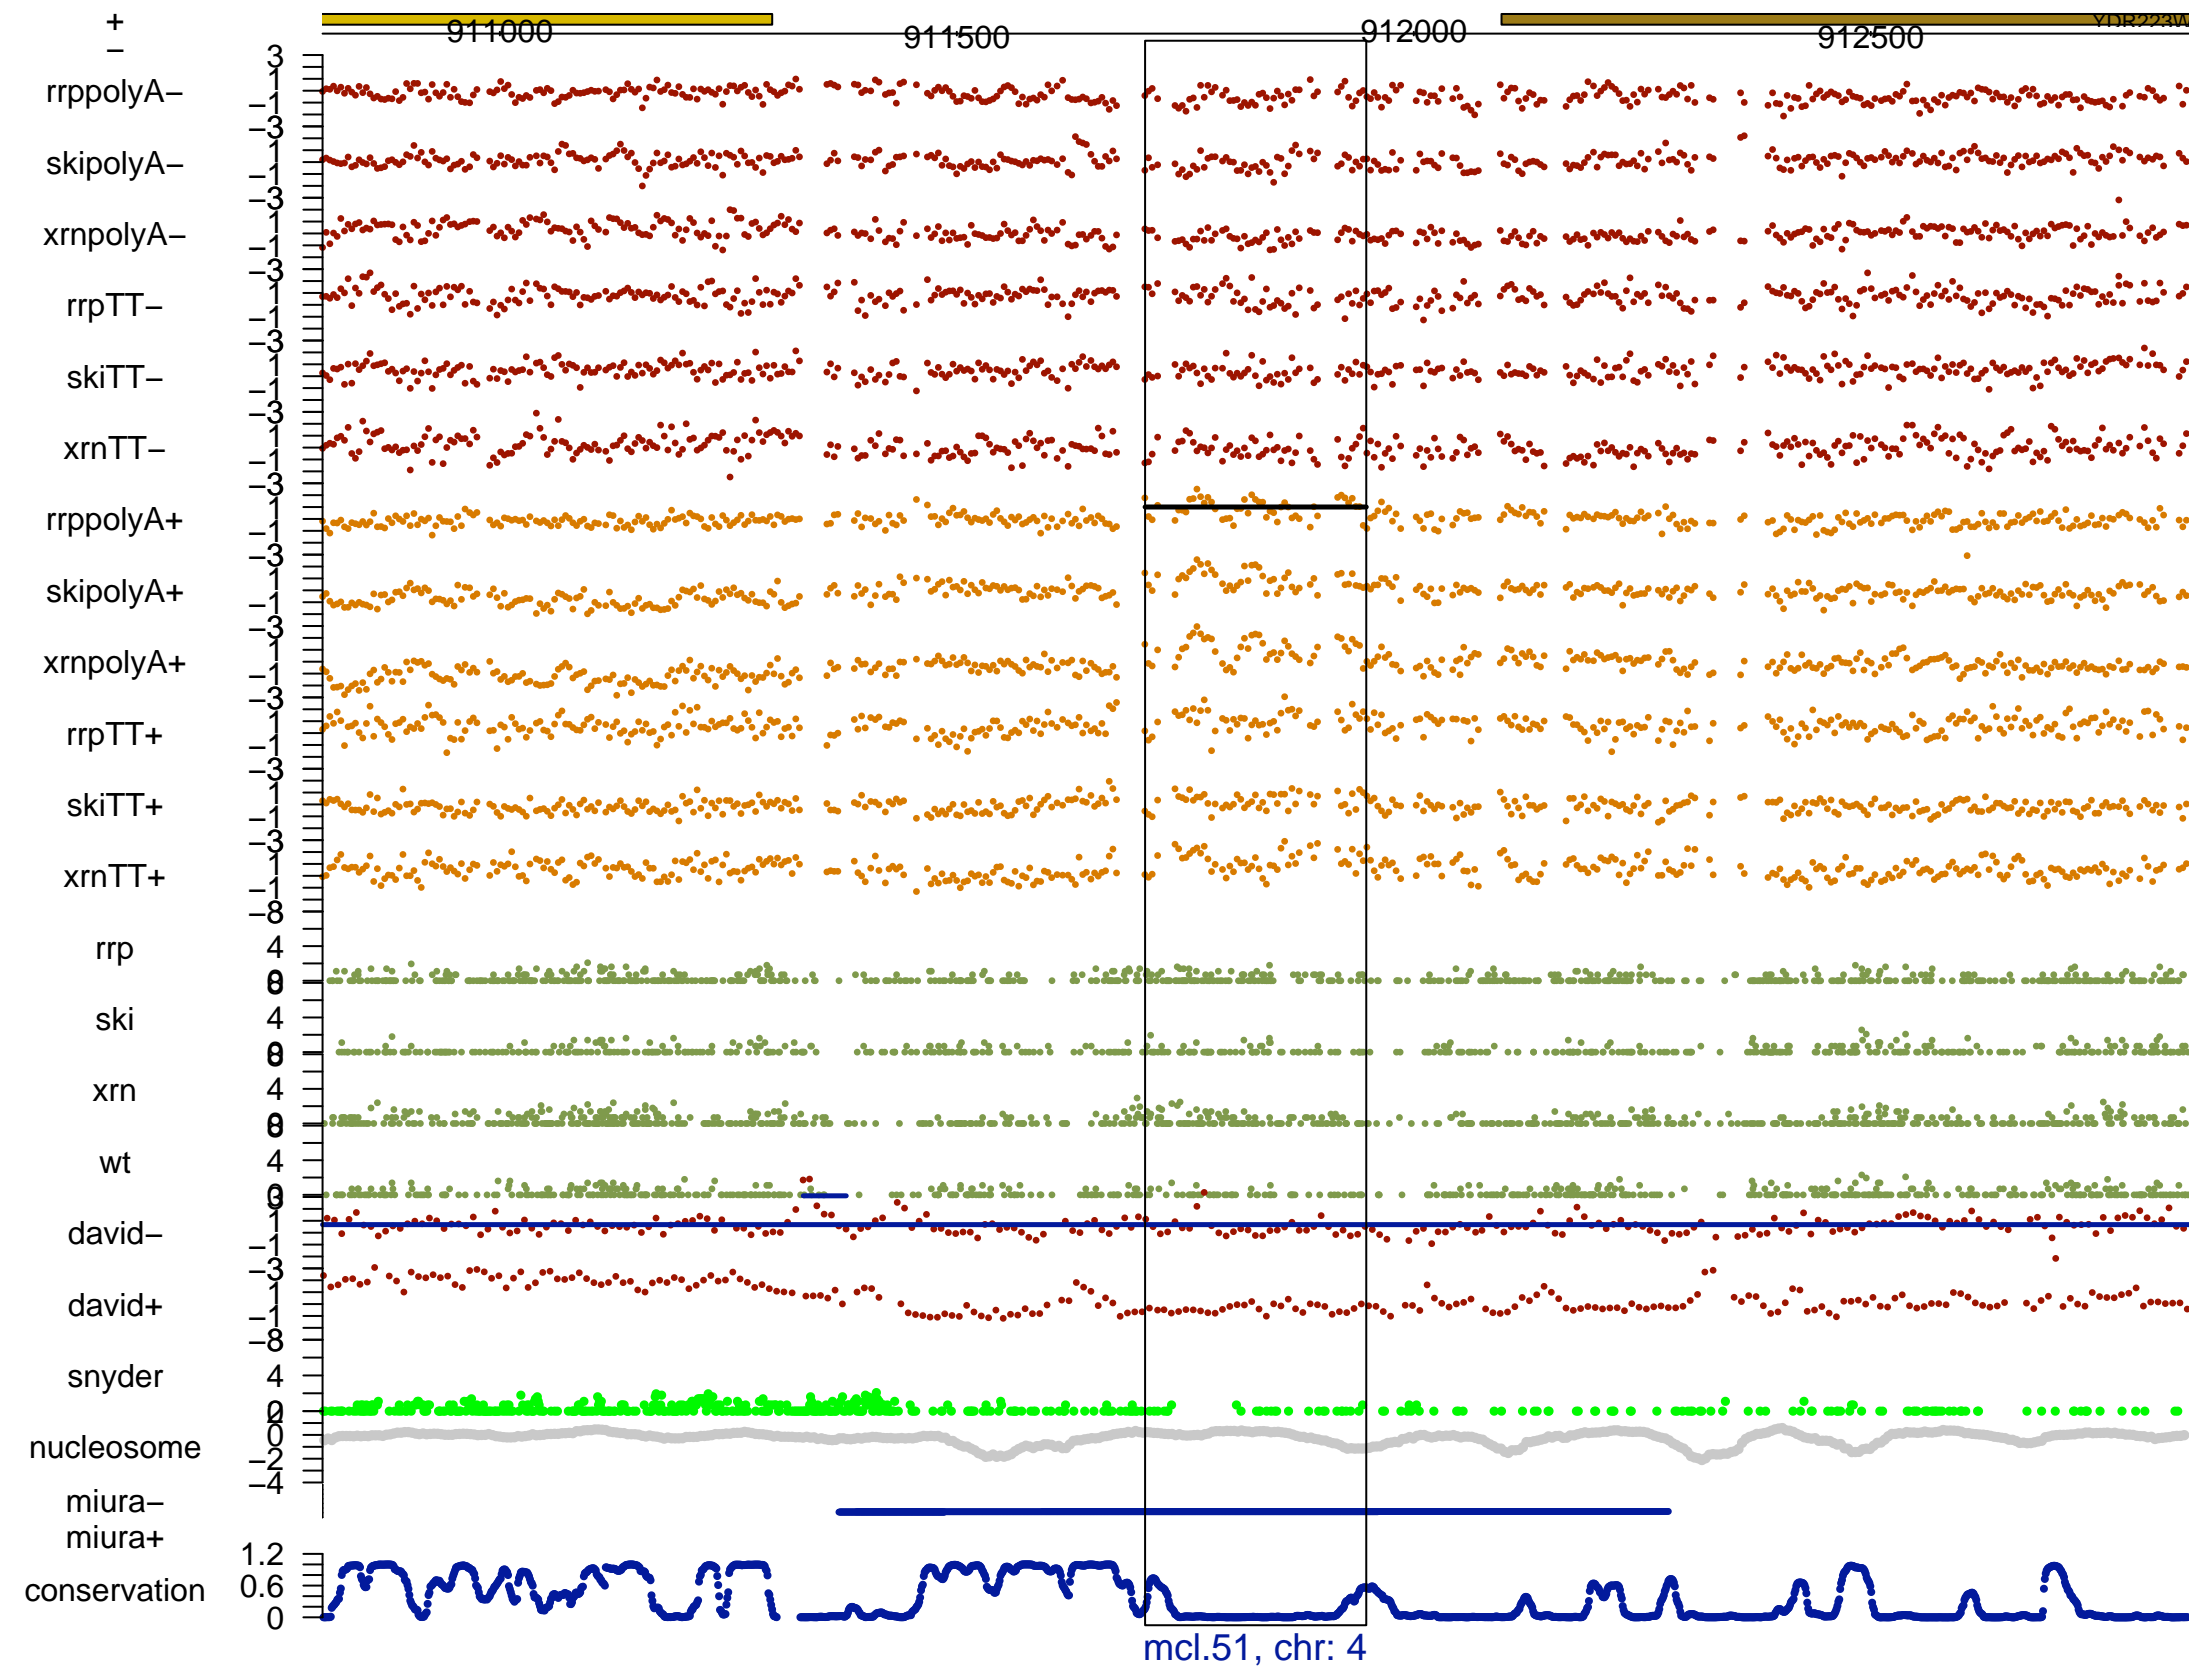





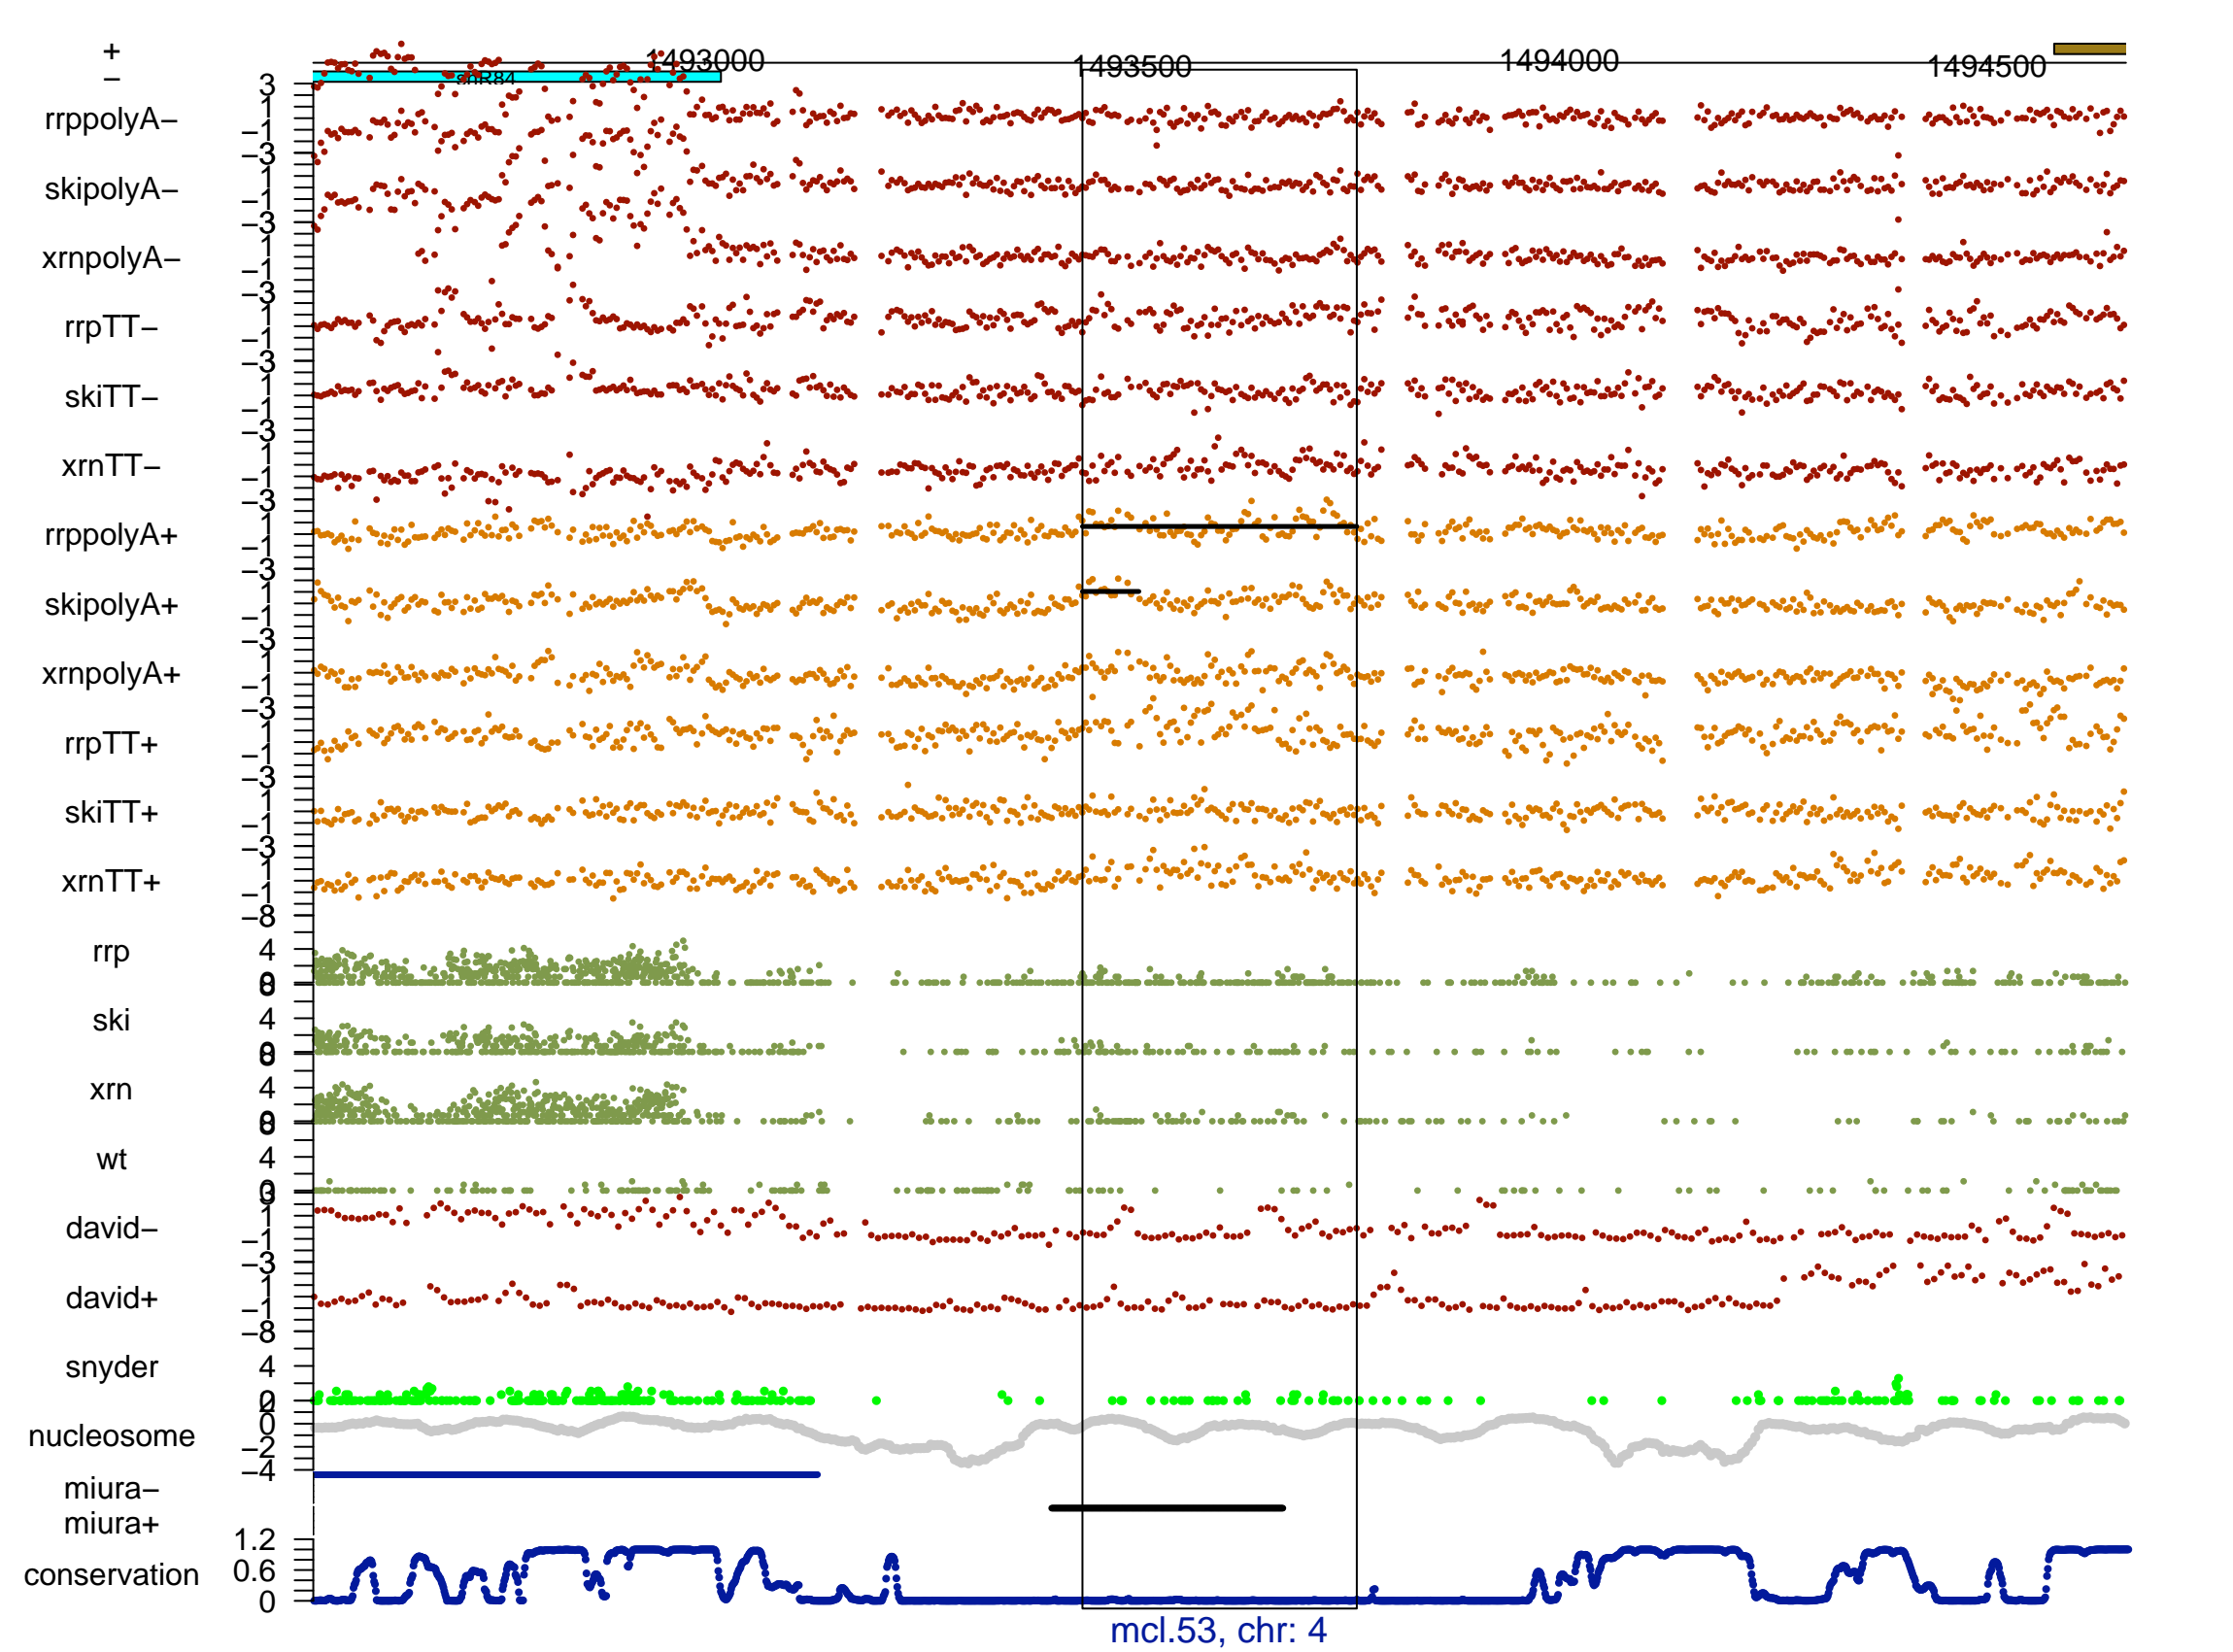

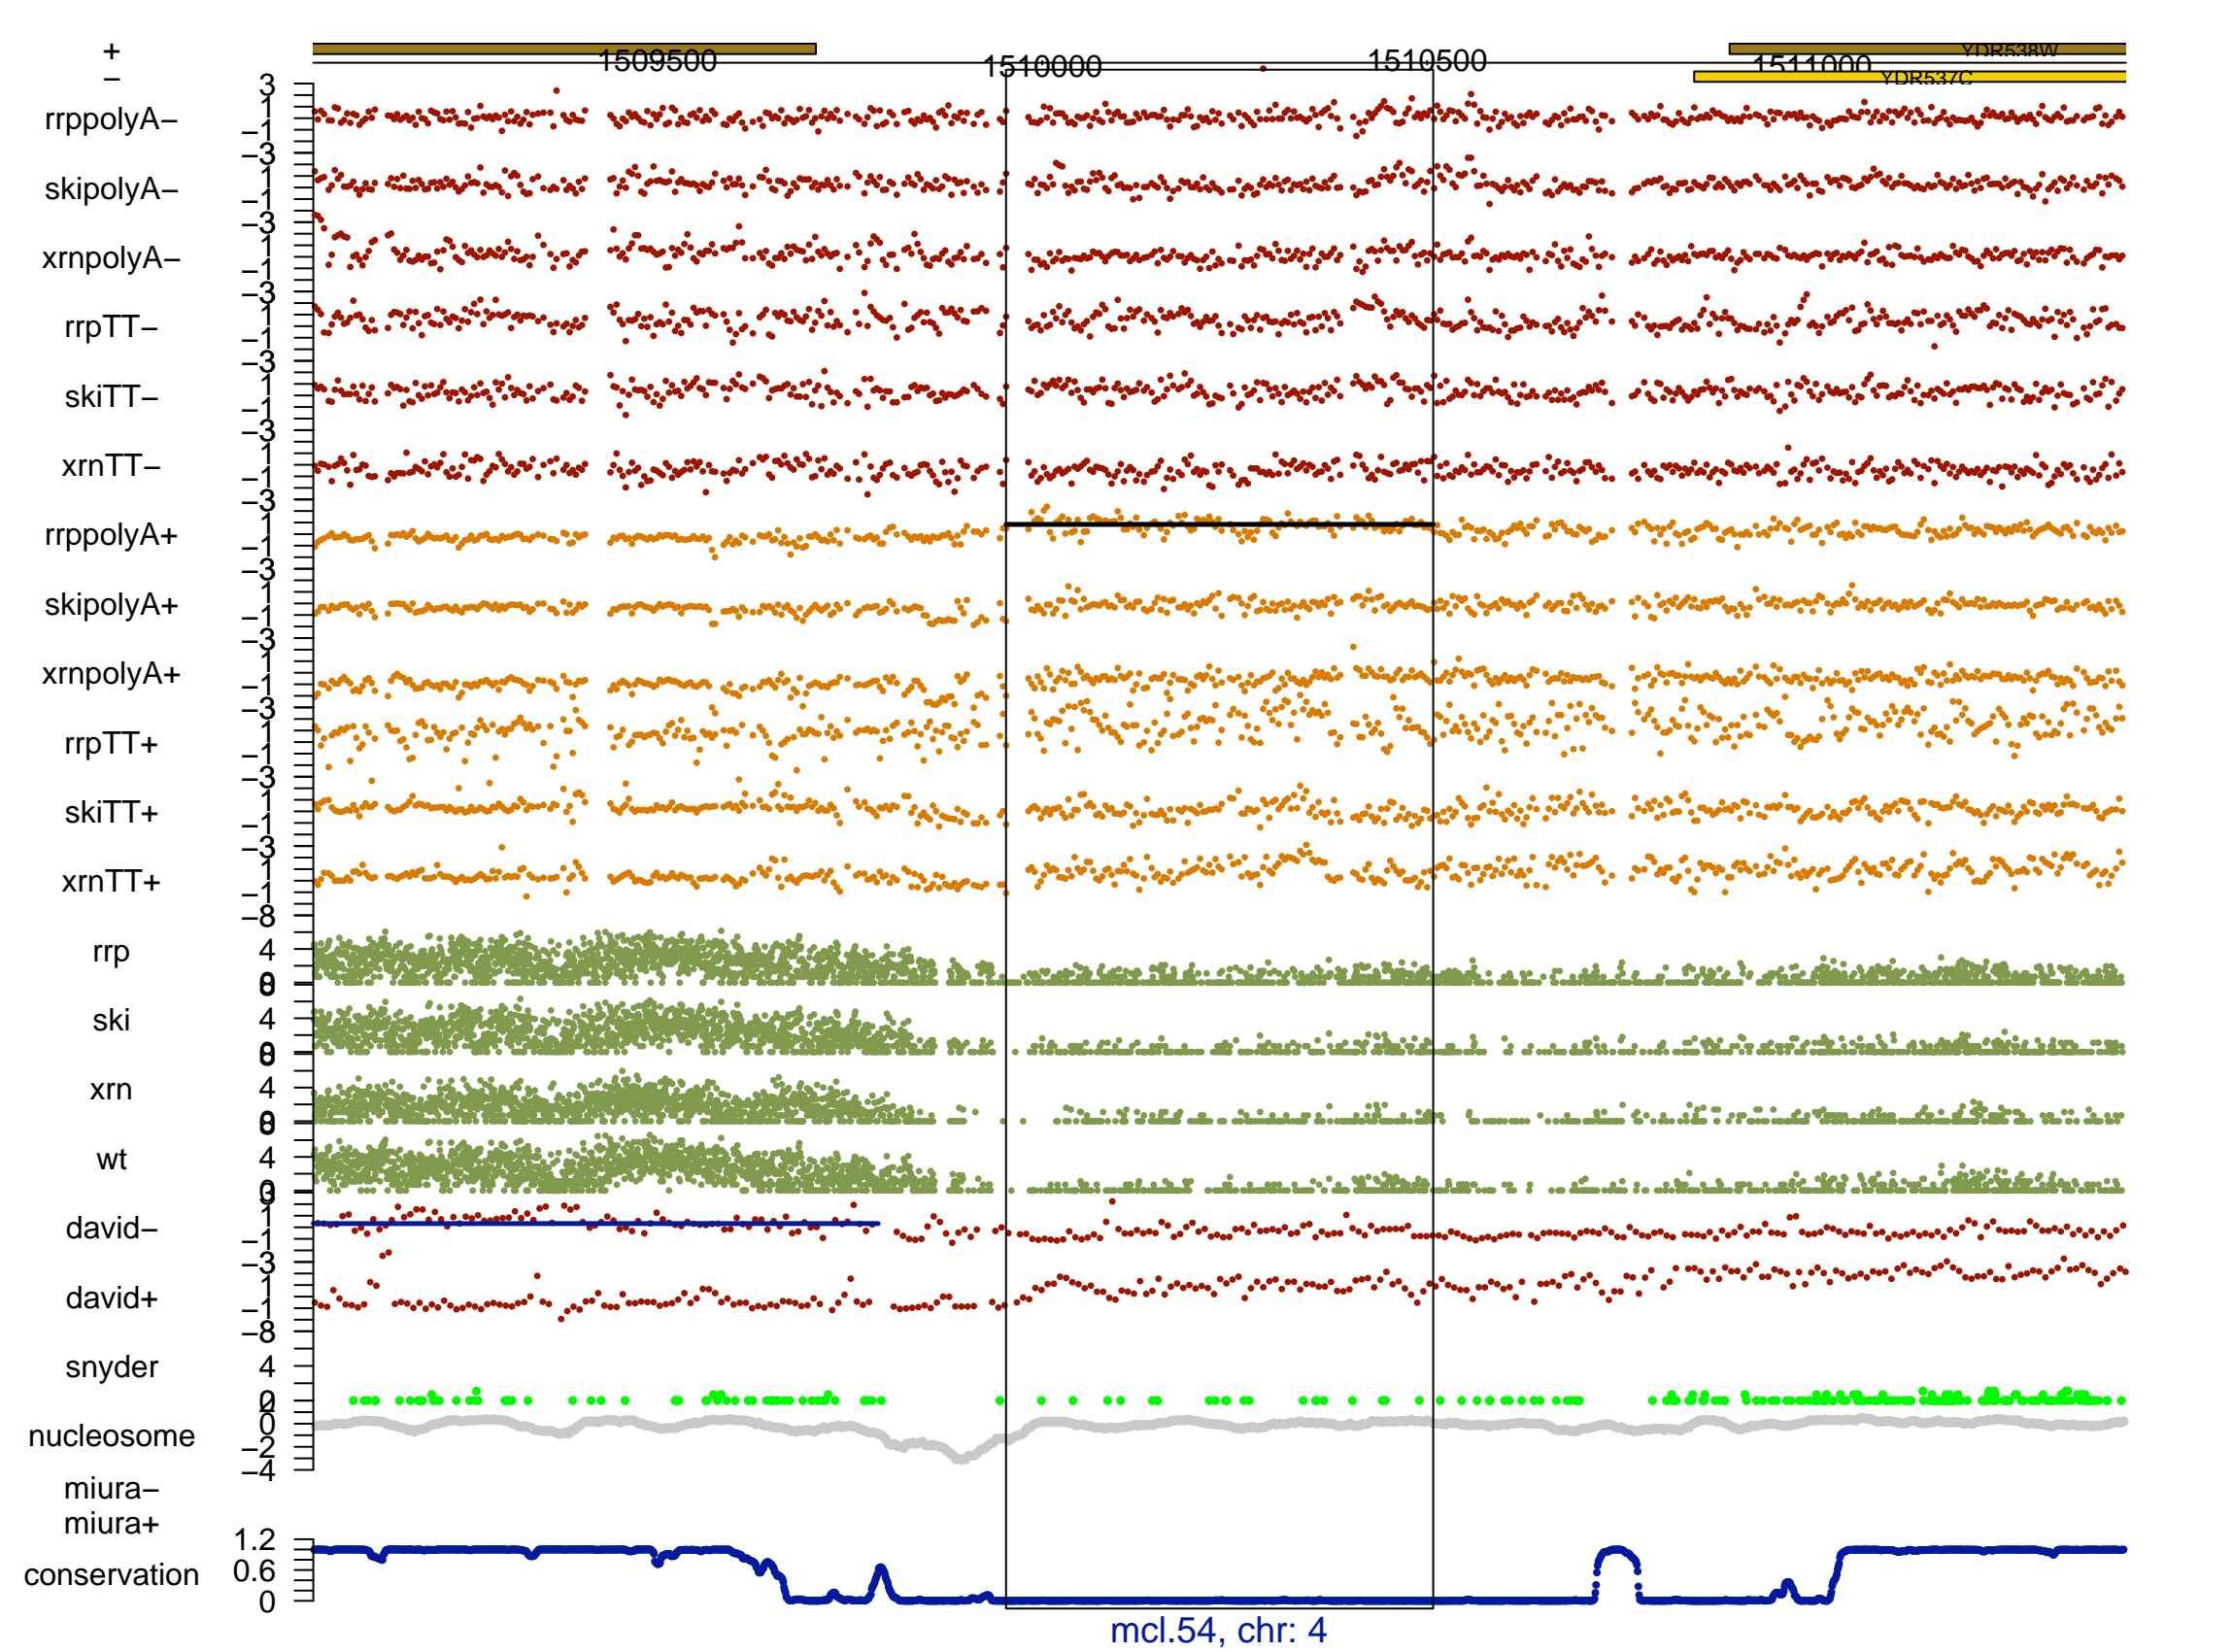

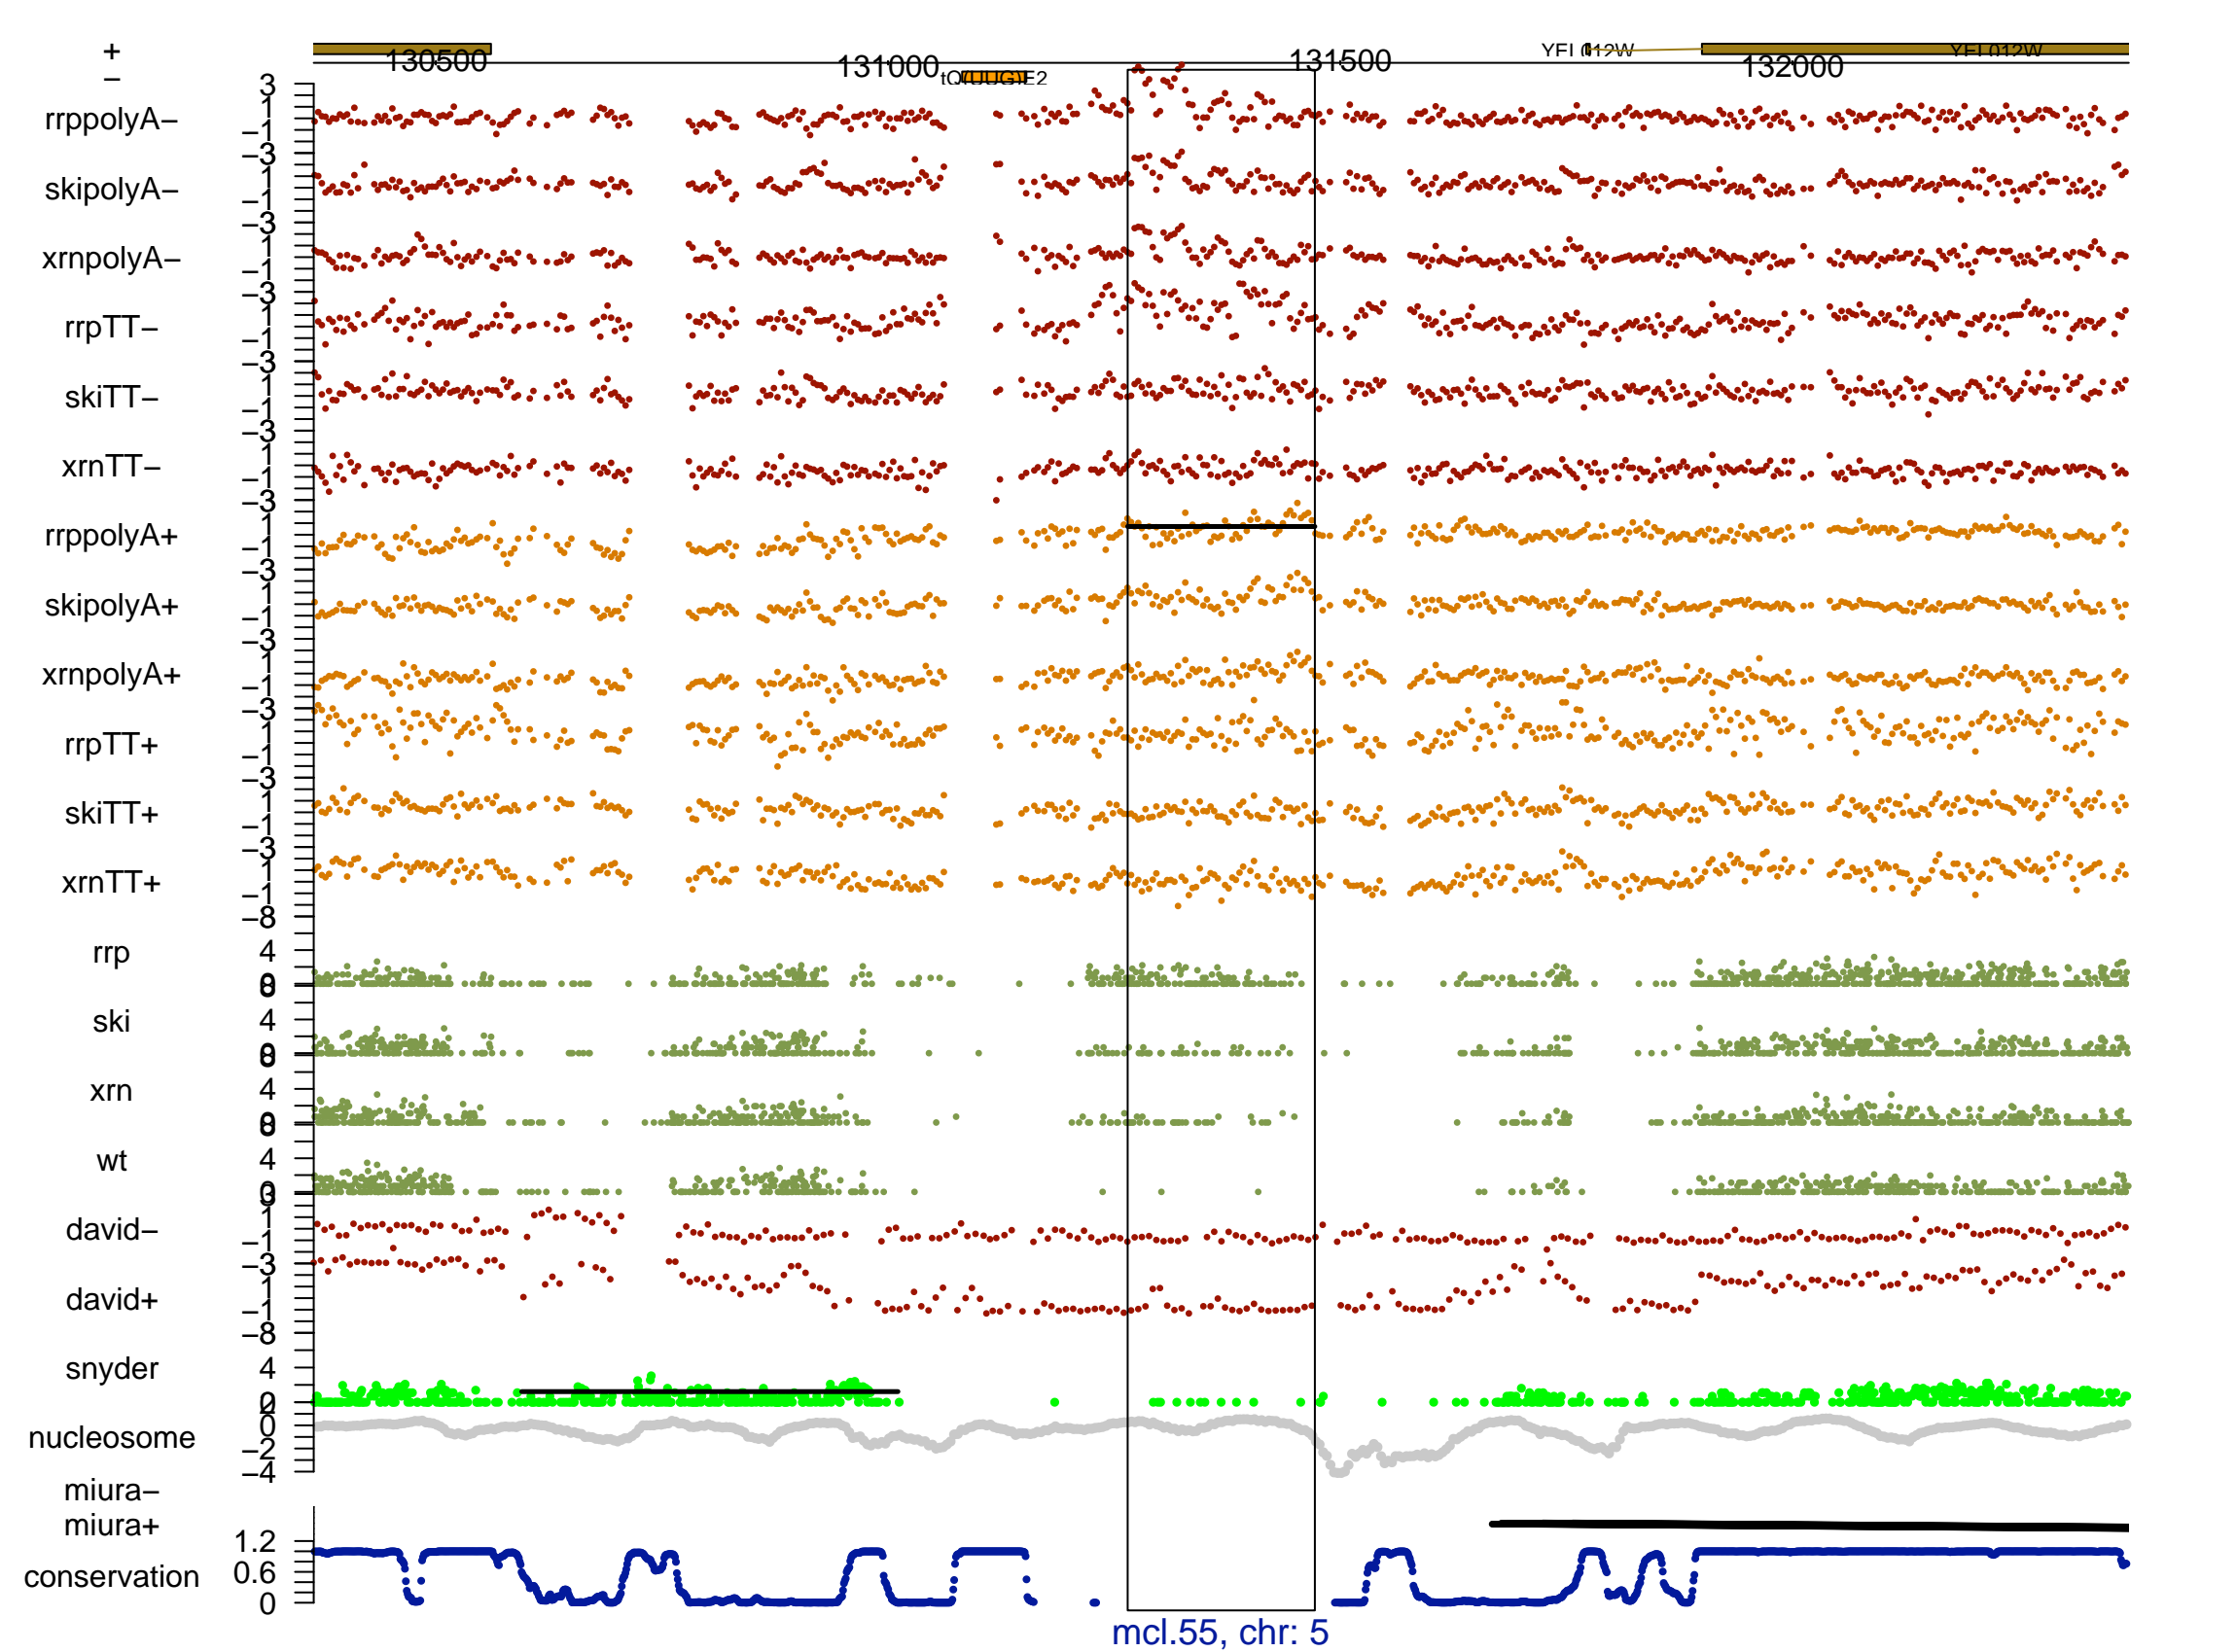





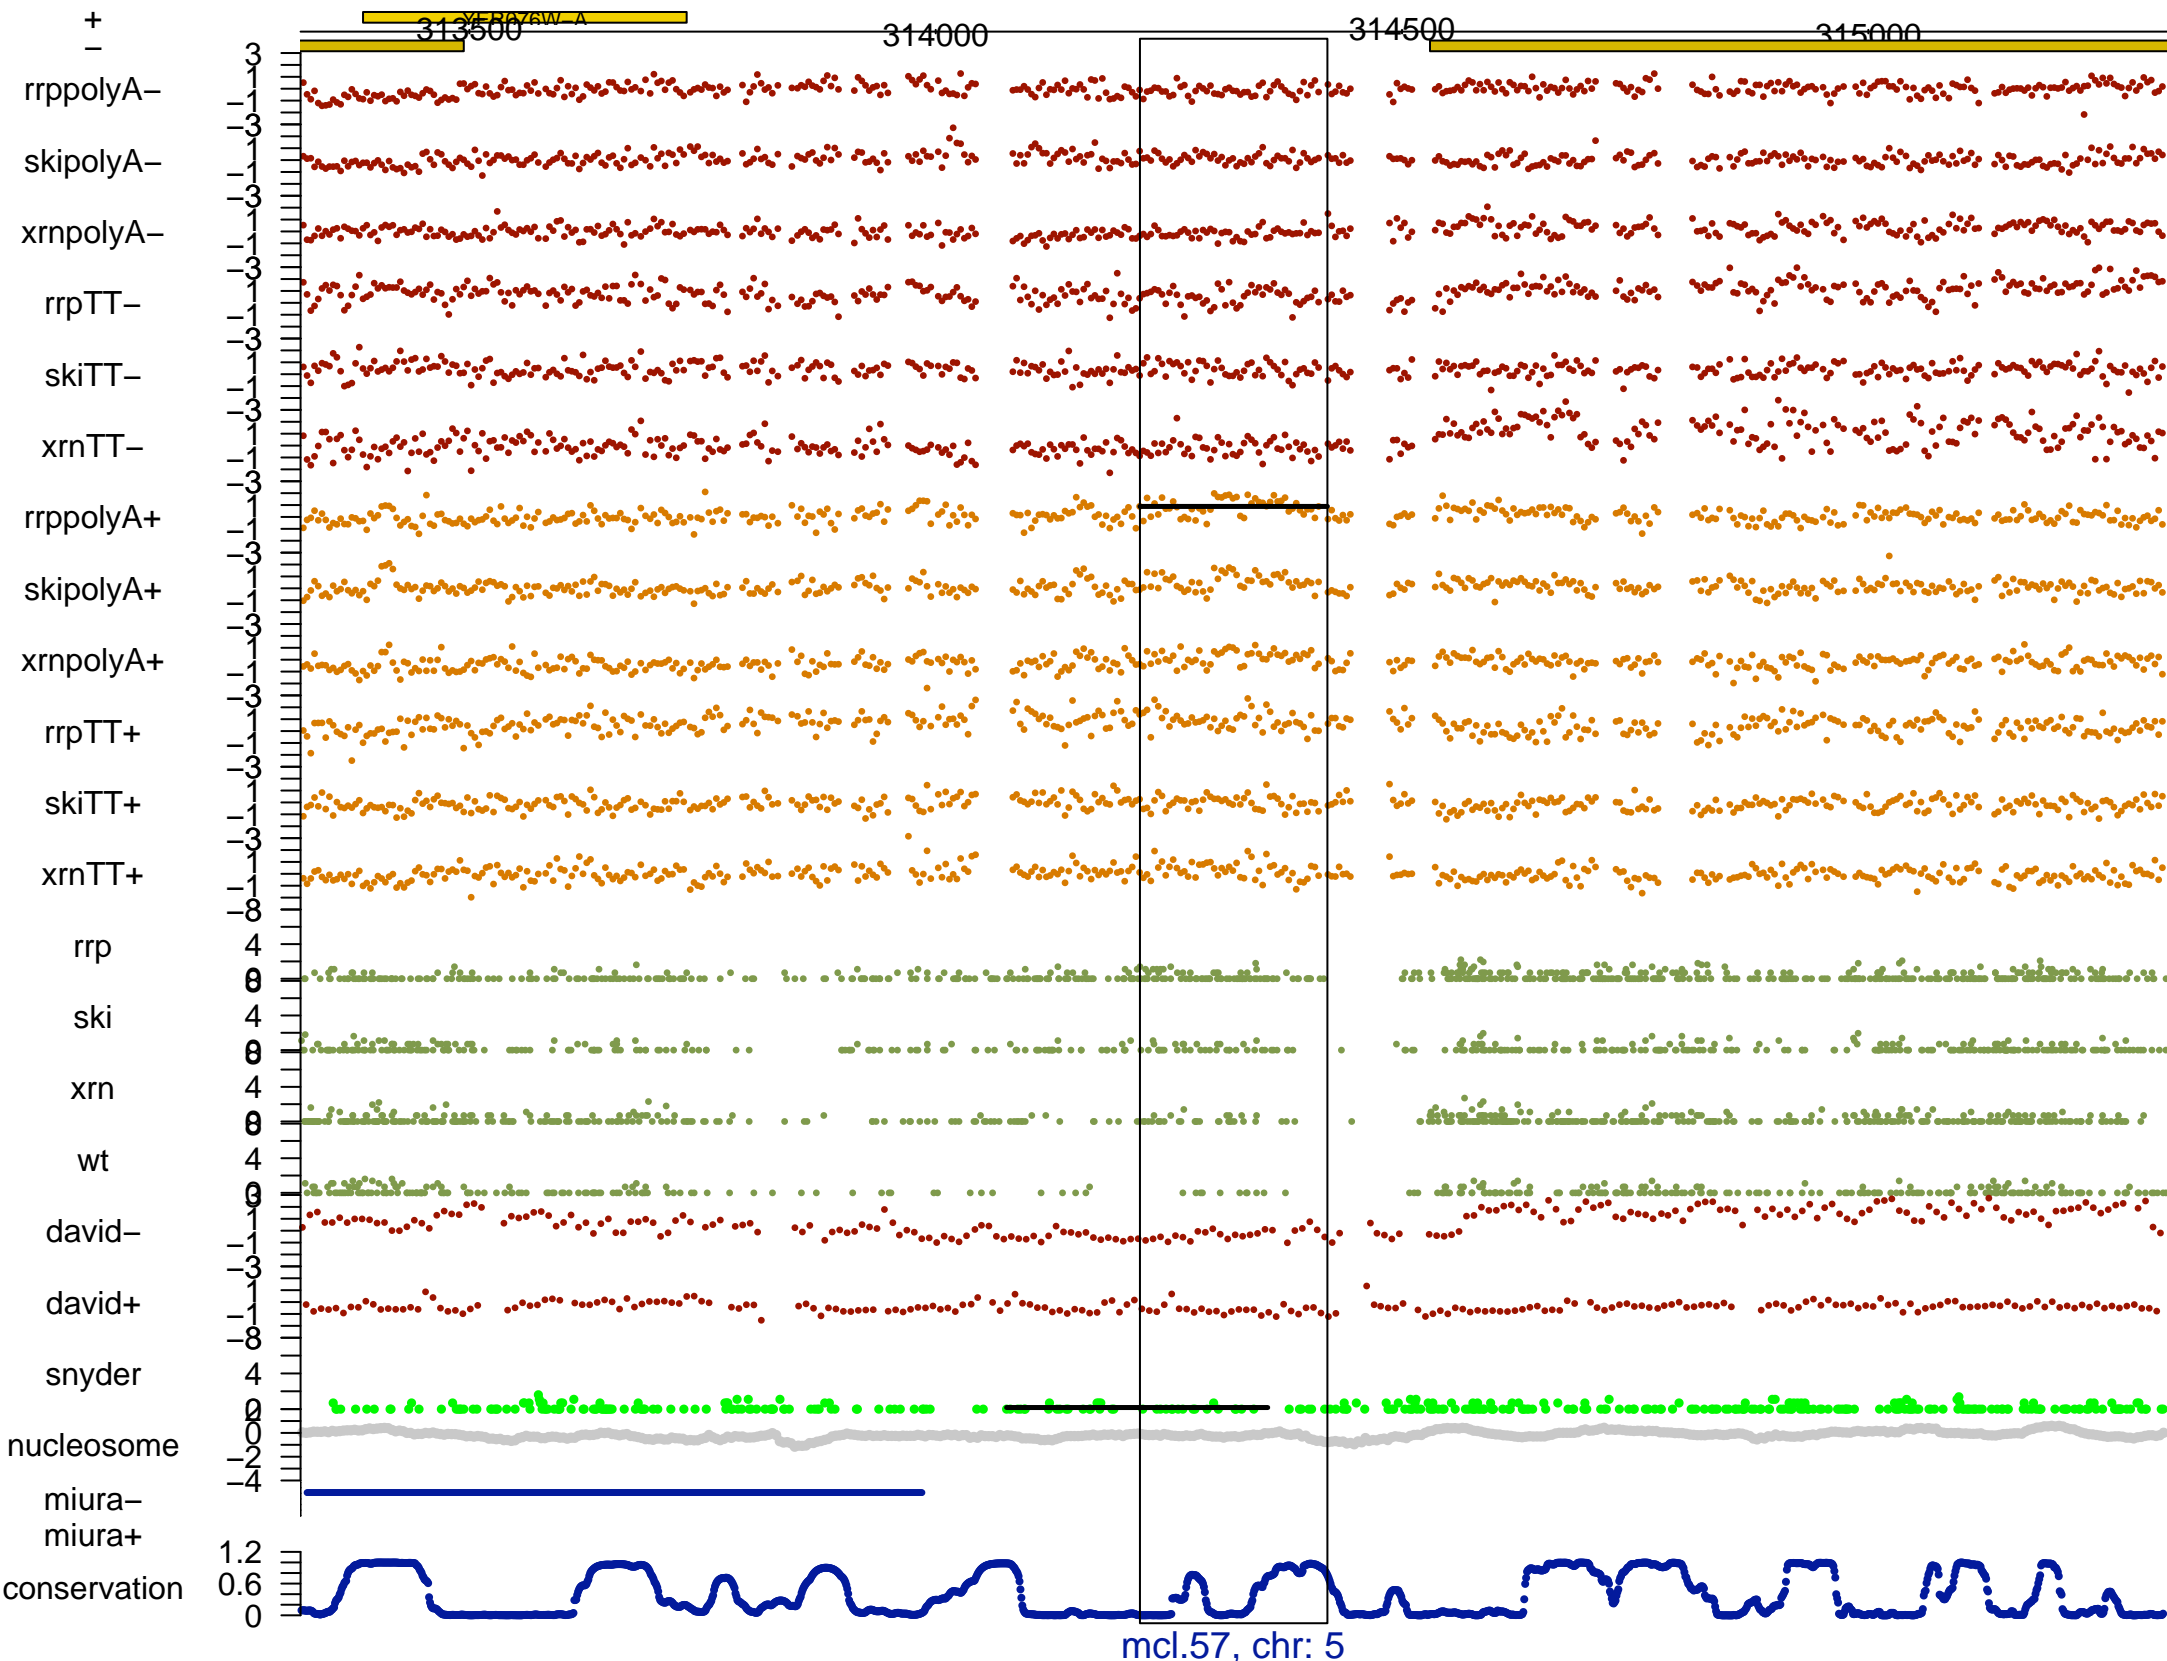

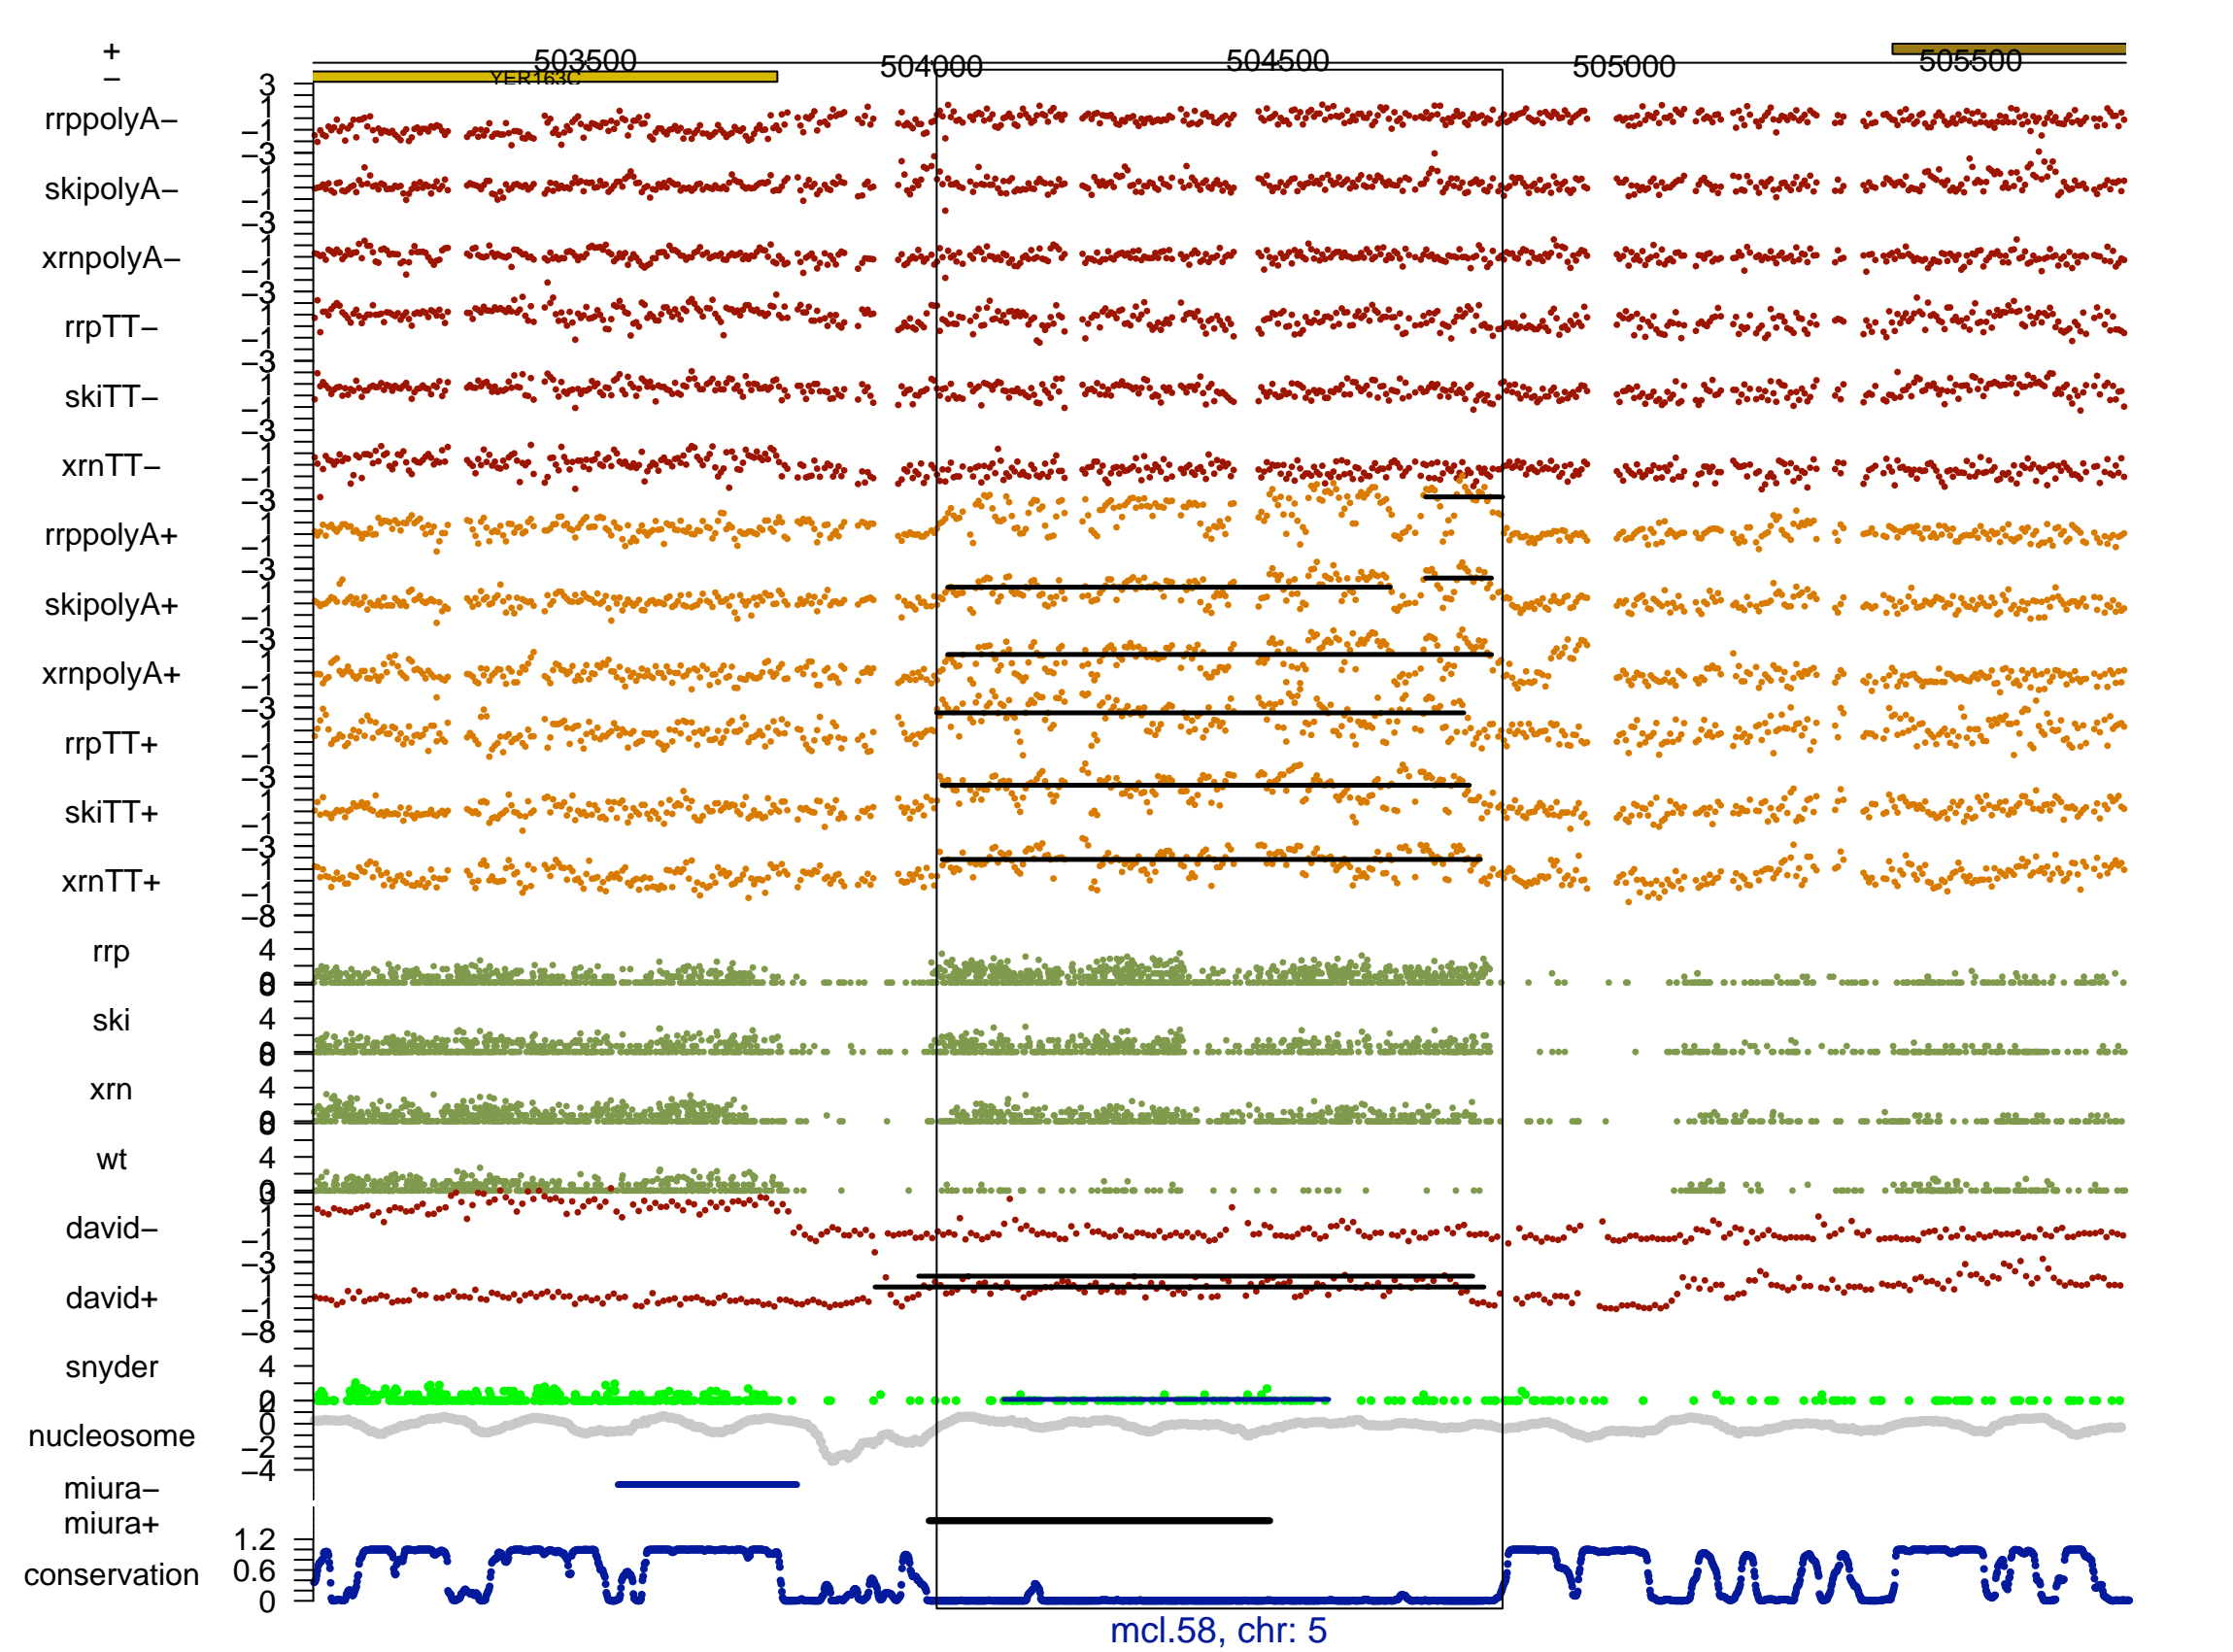

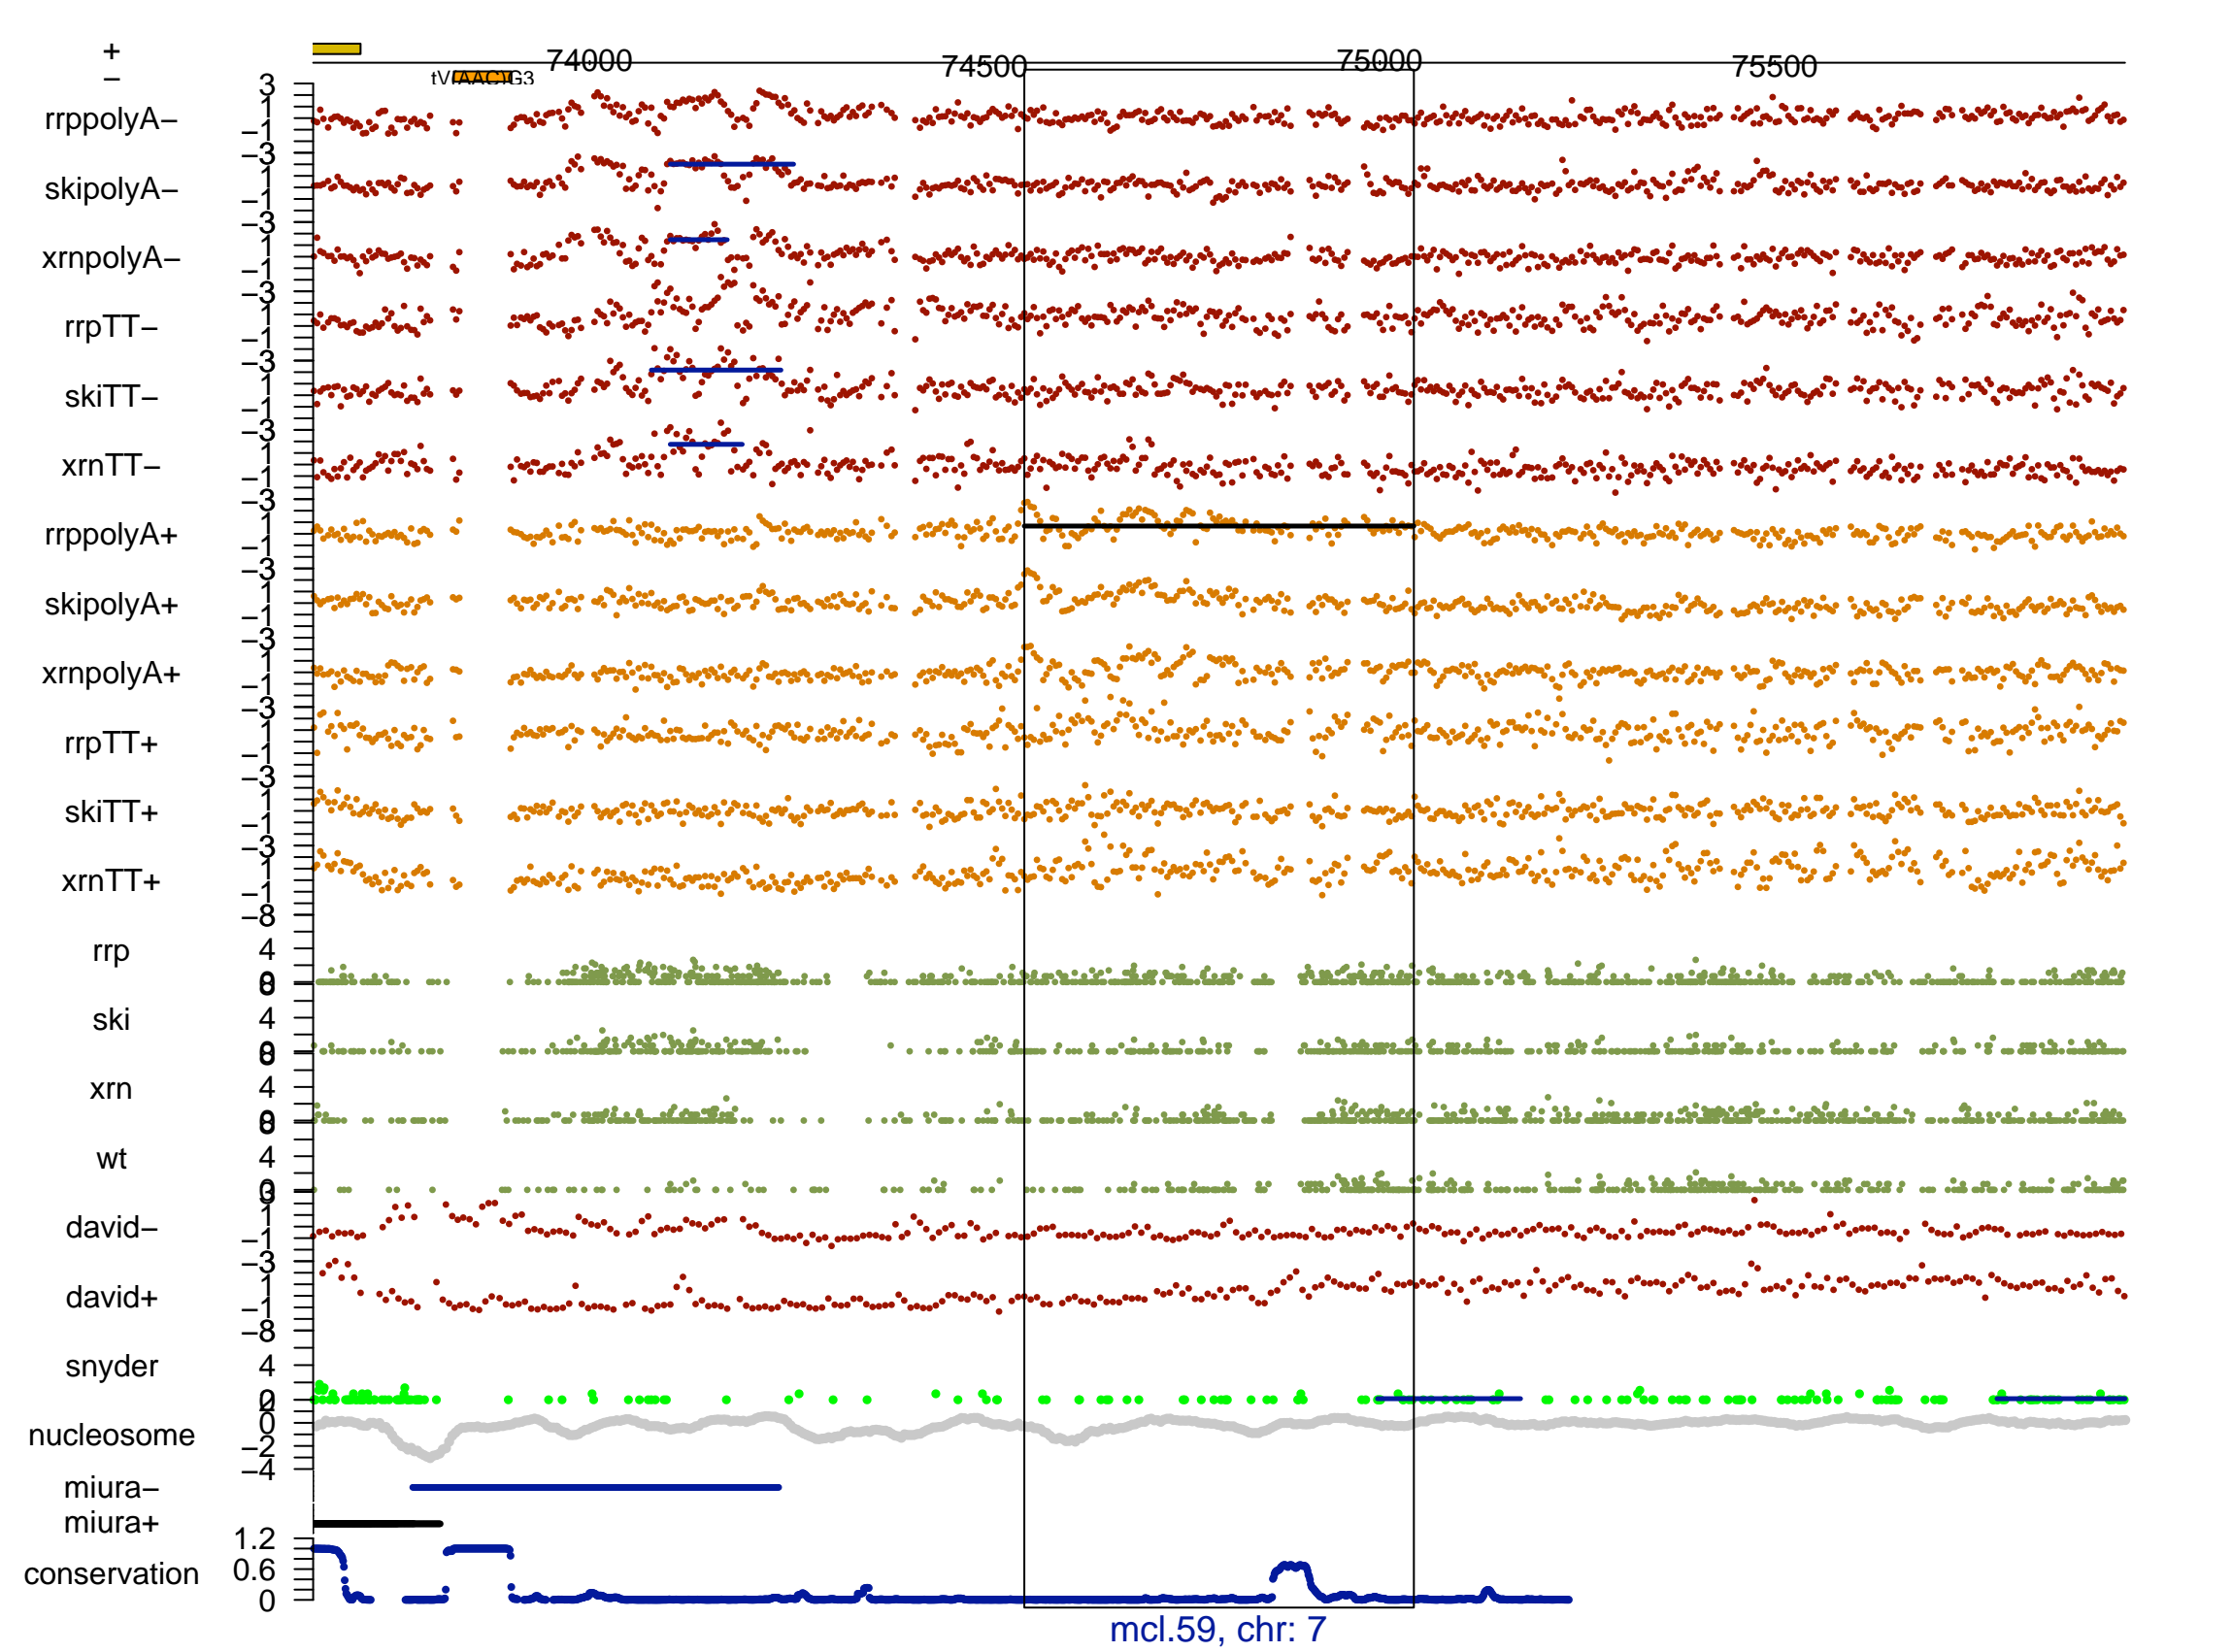



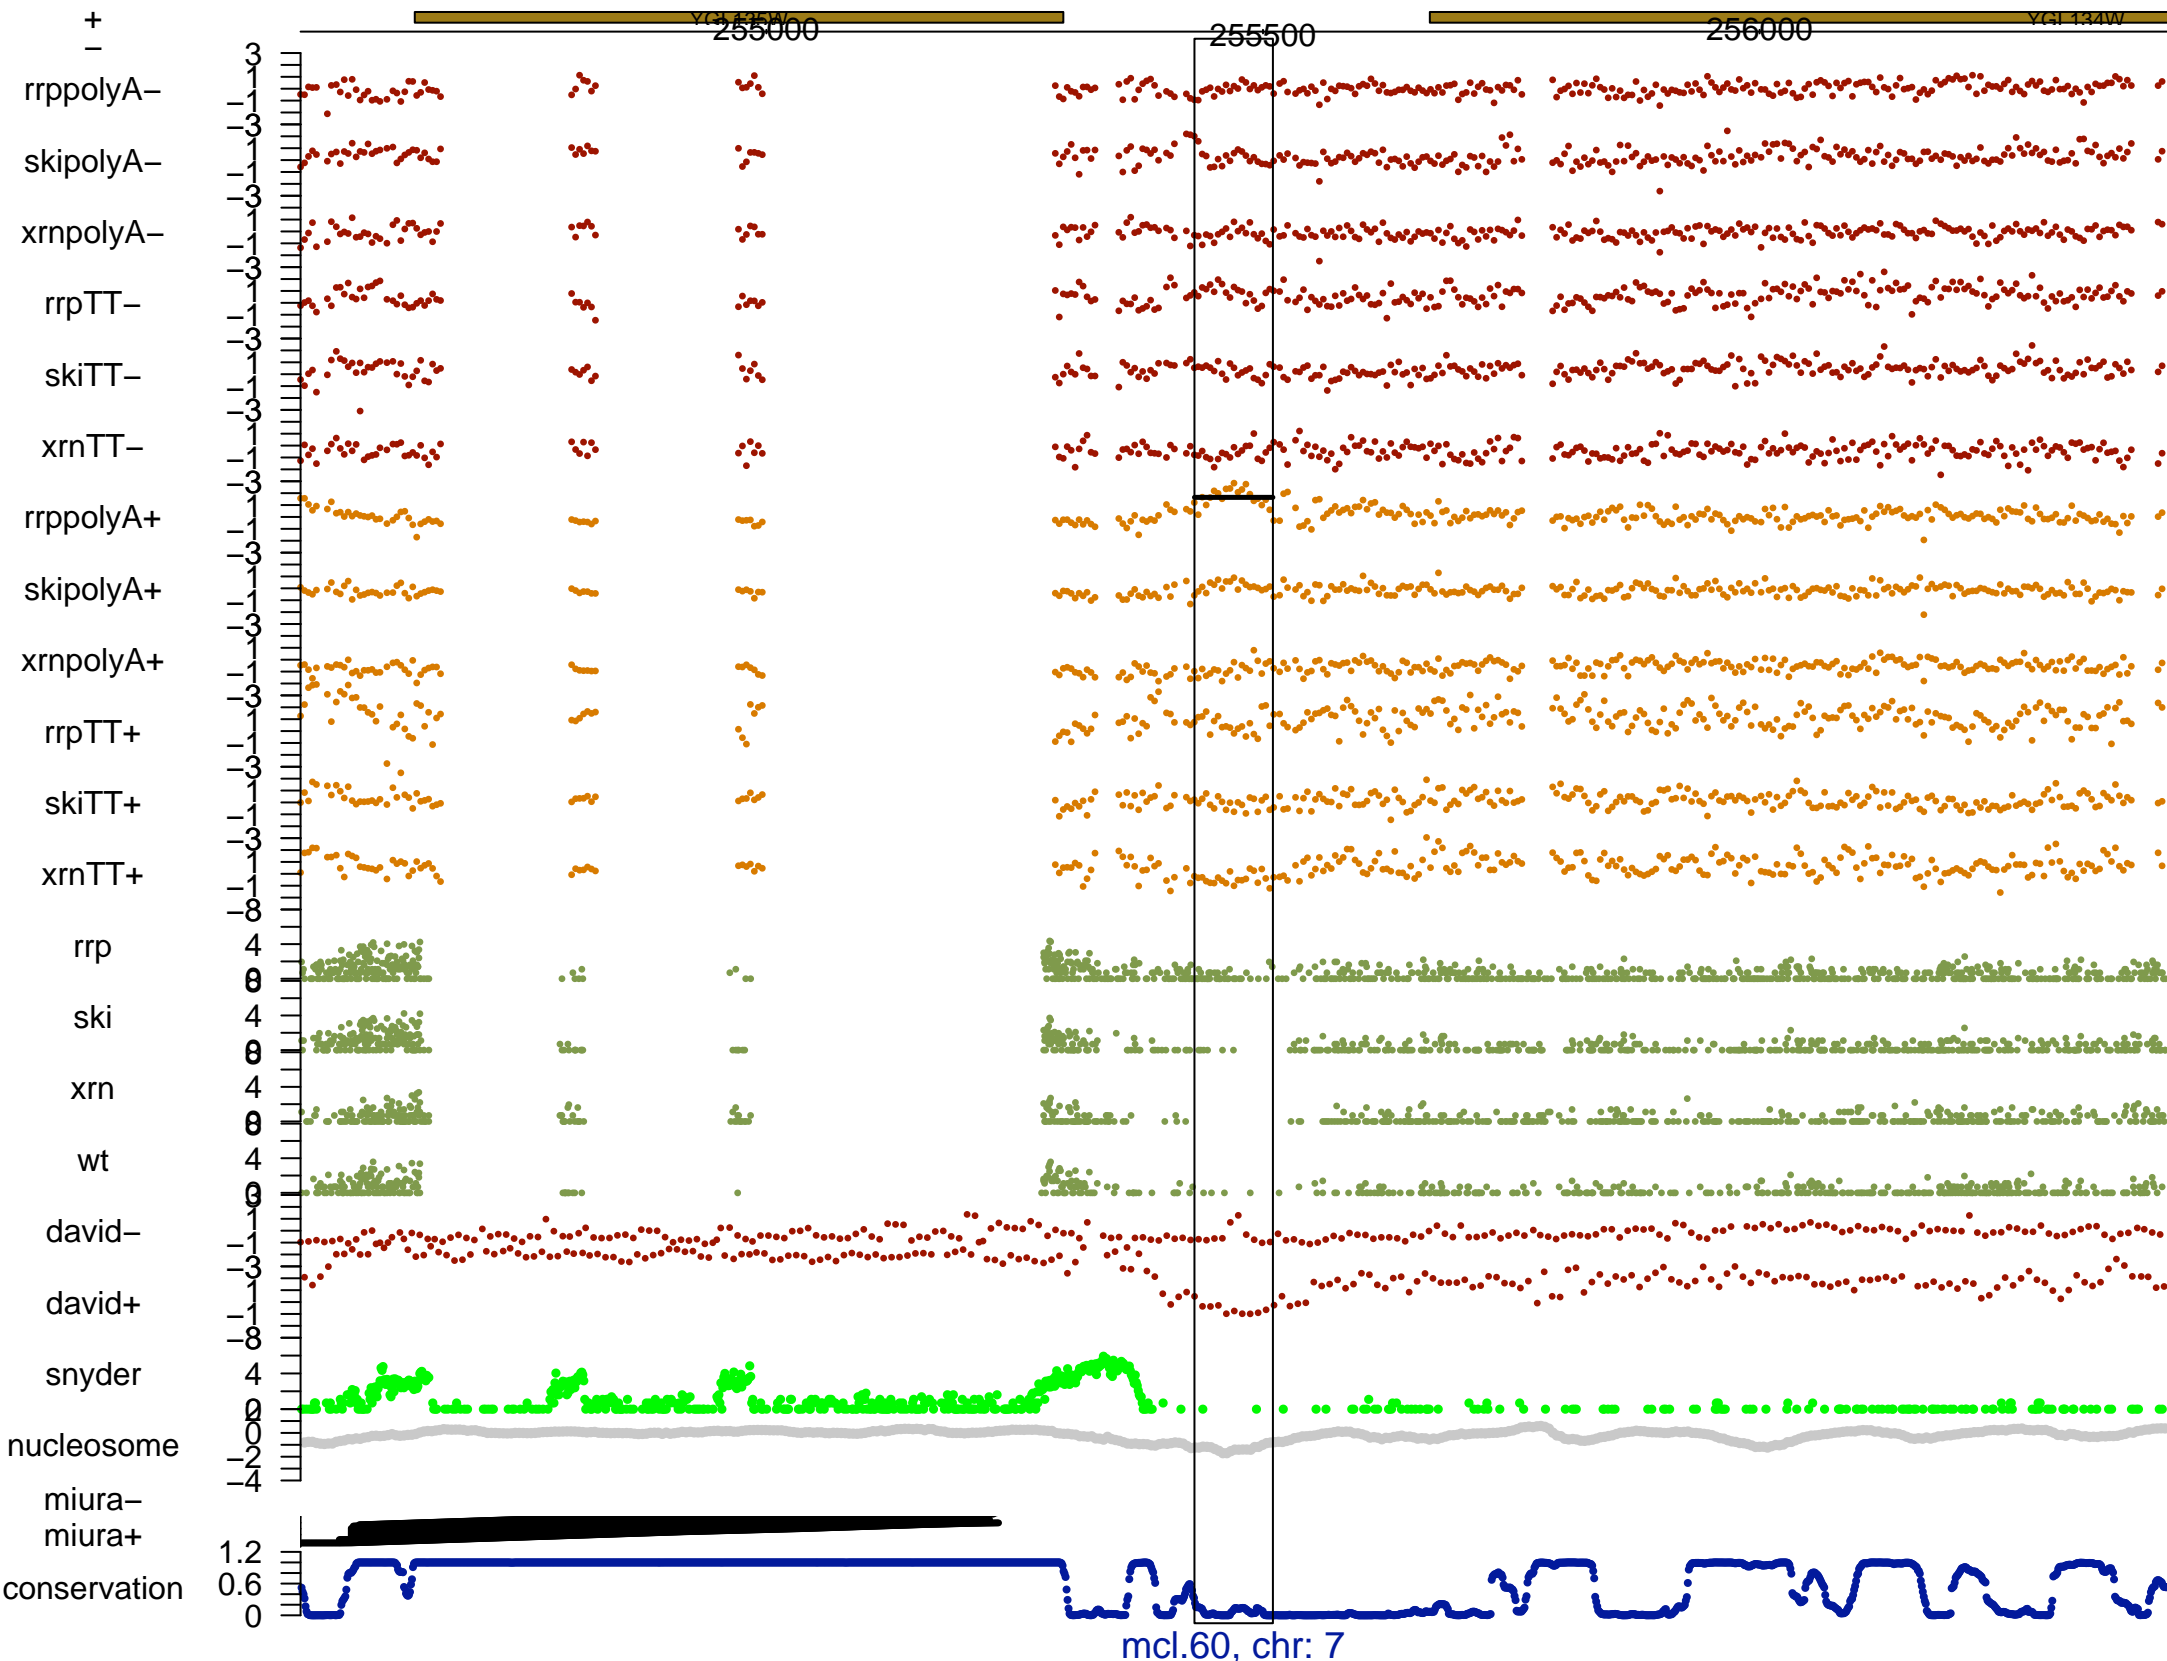

mcl.60, chr: 7

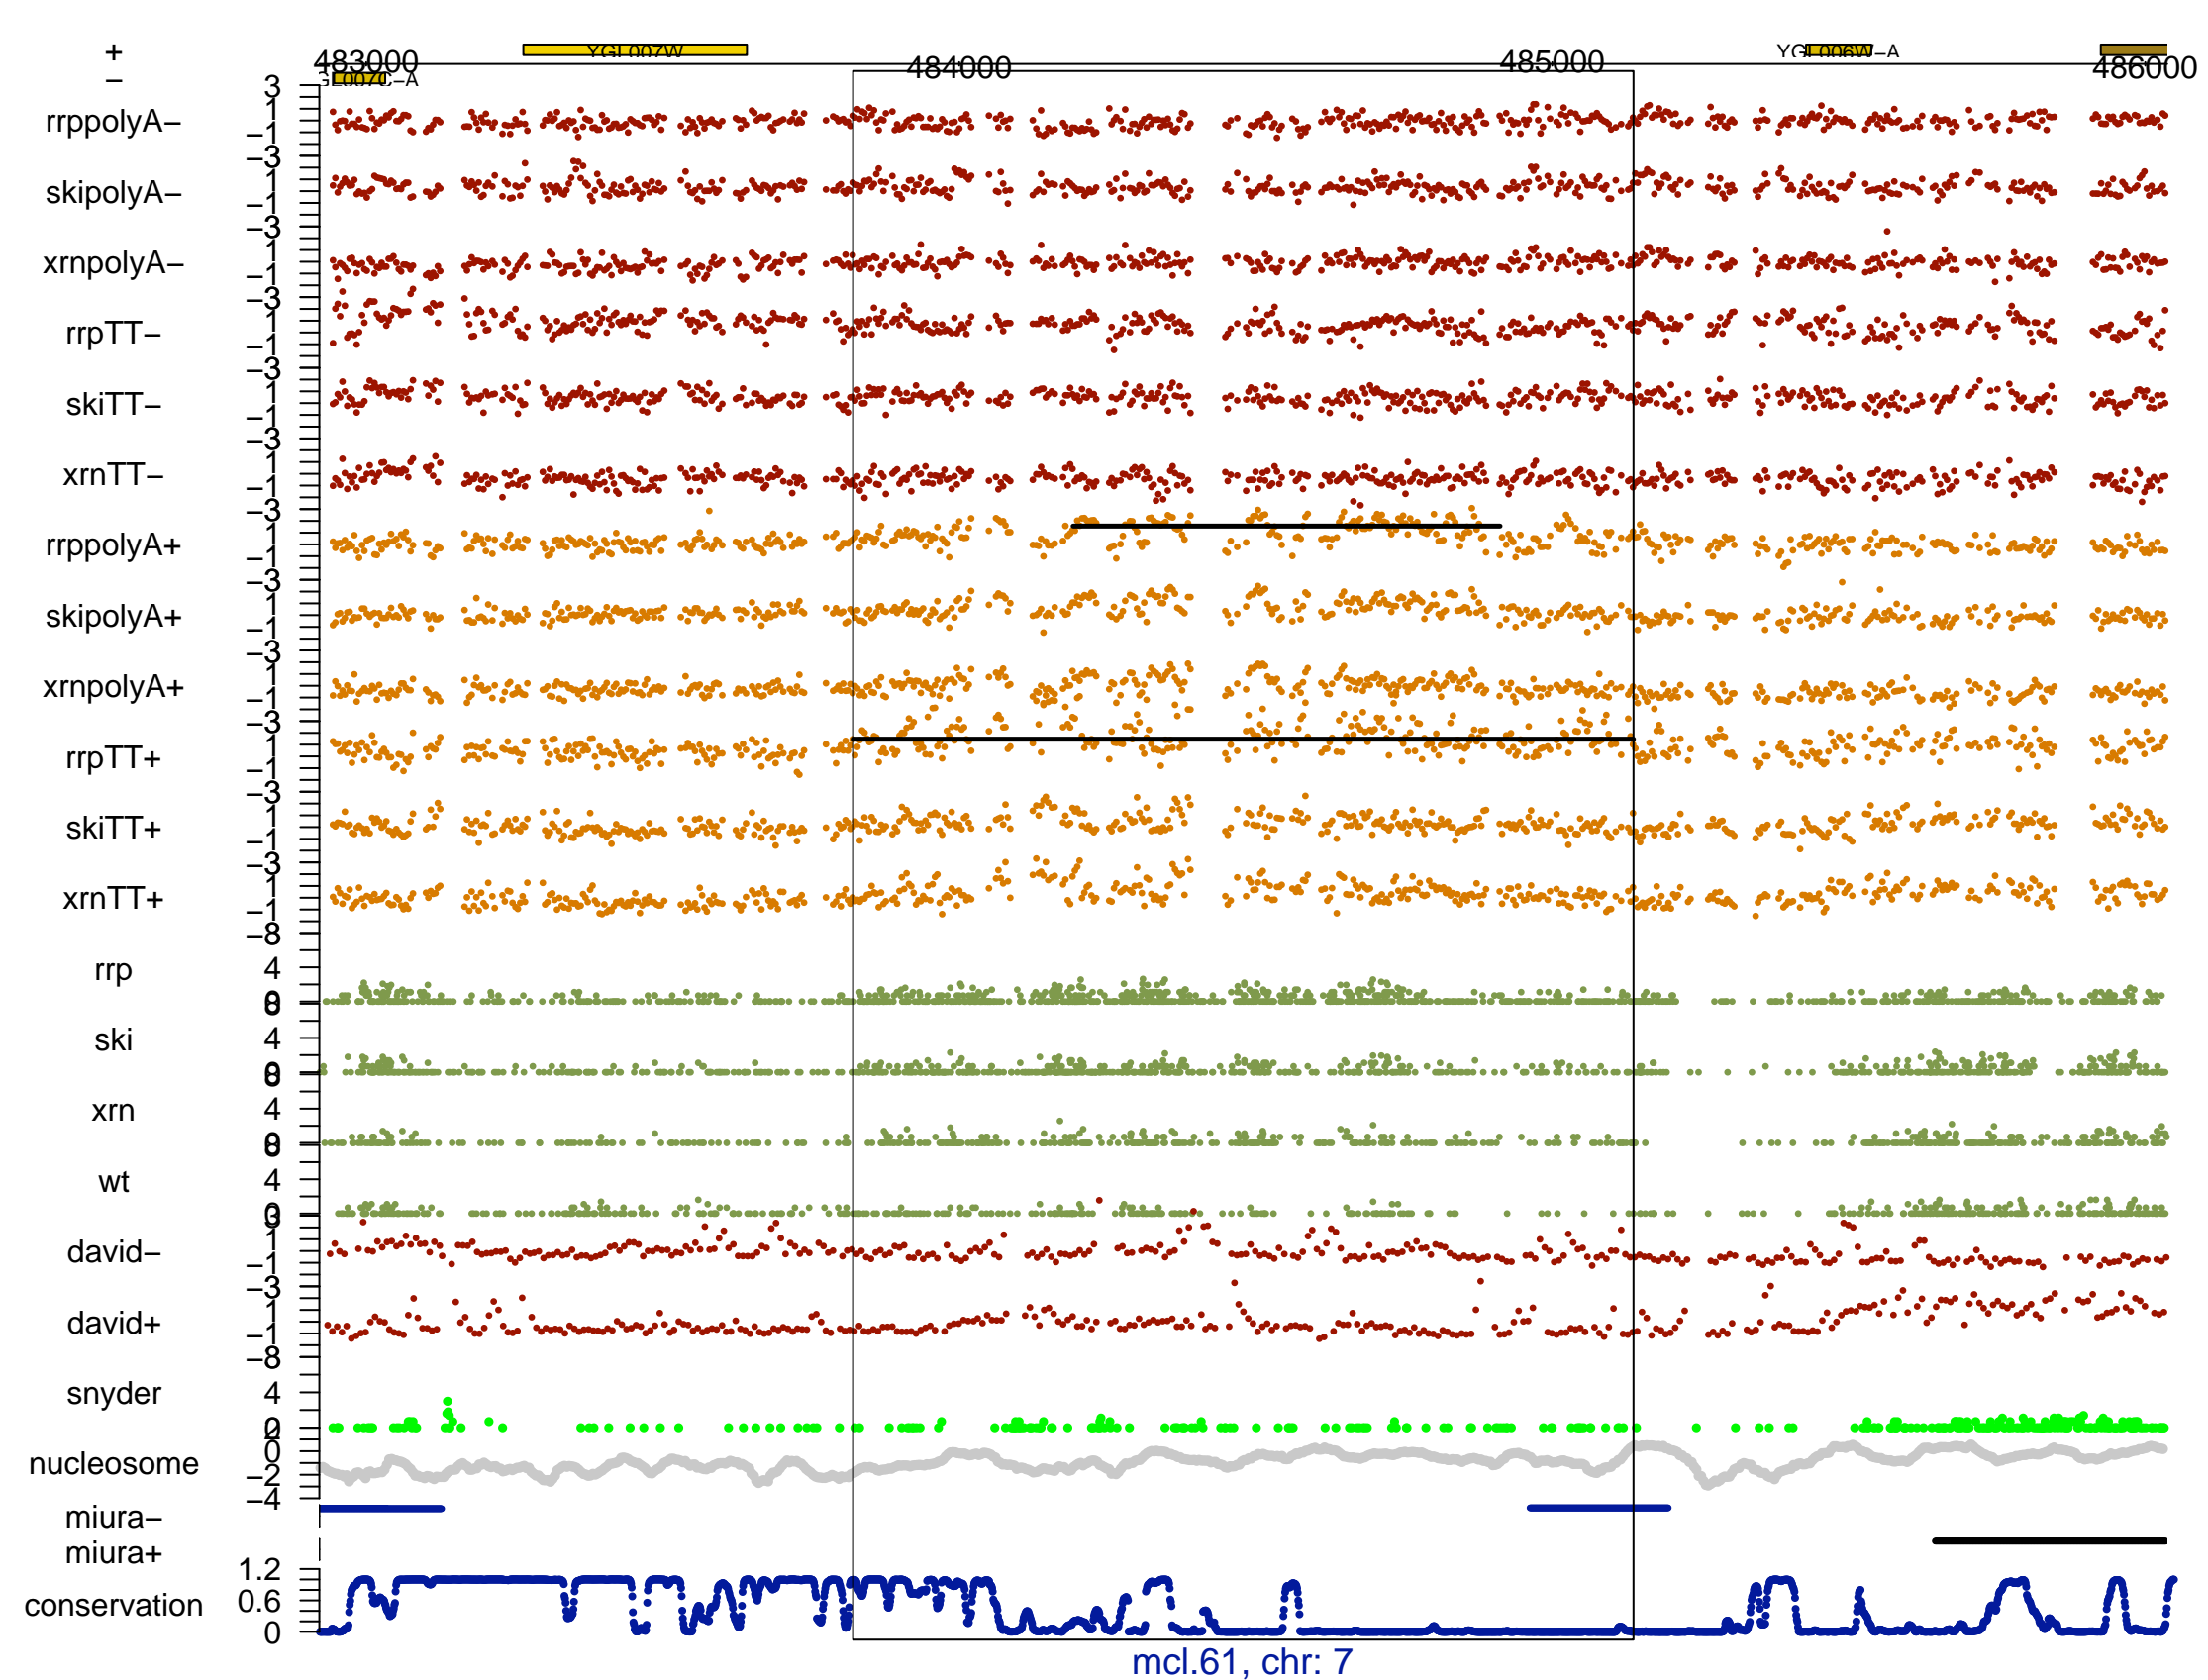

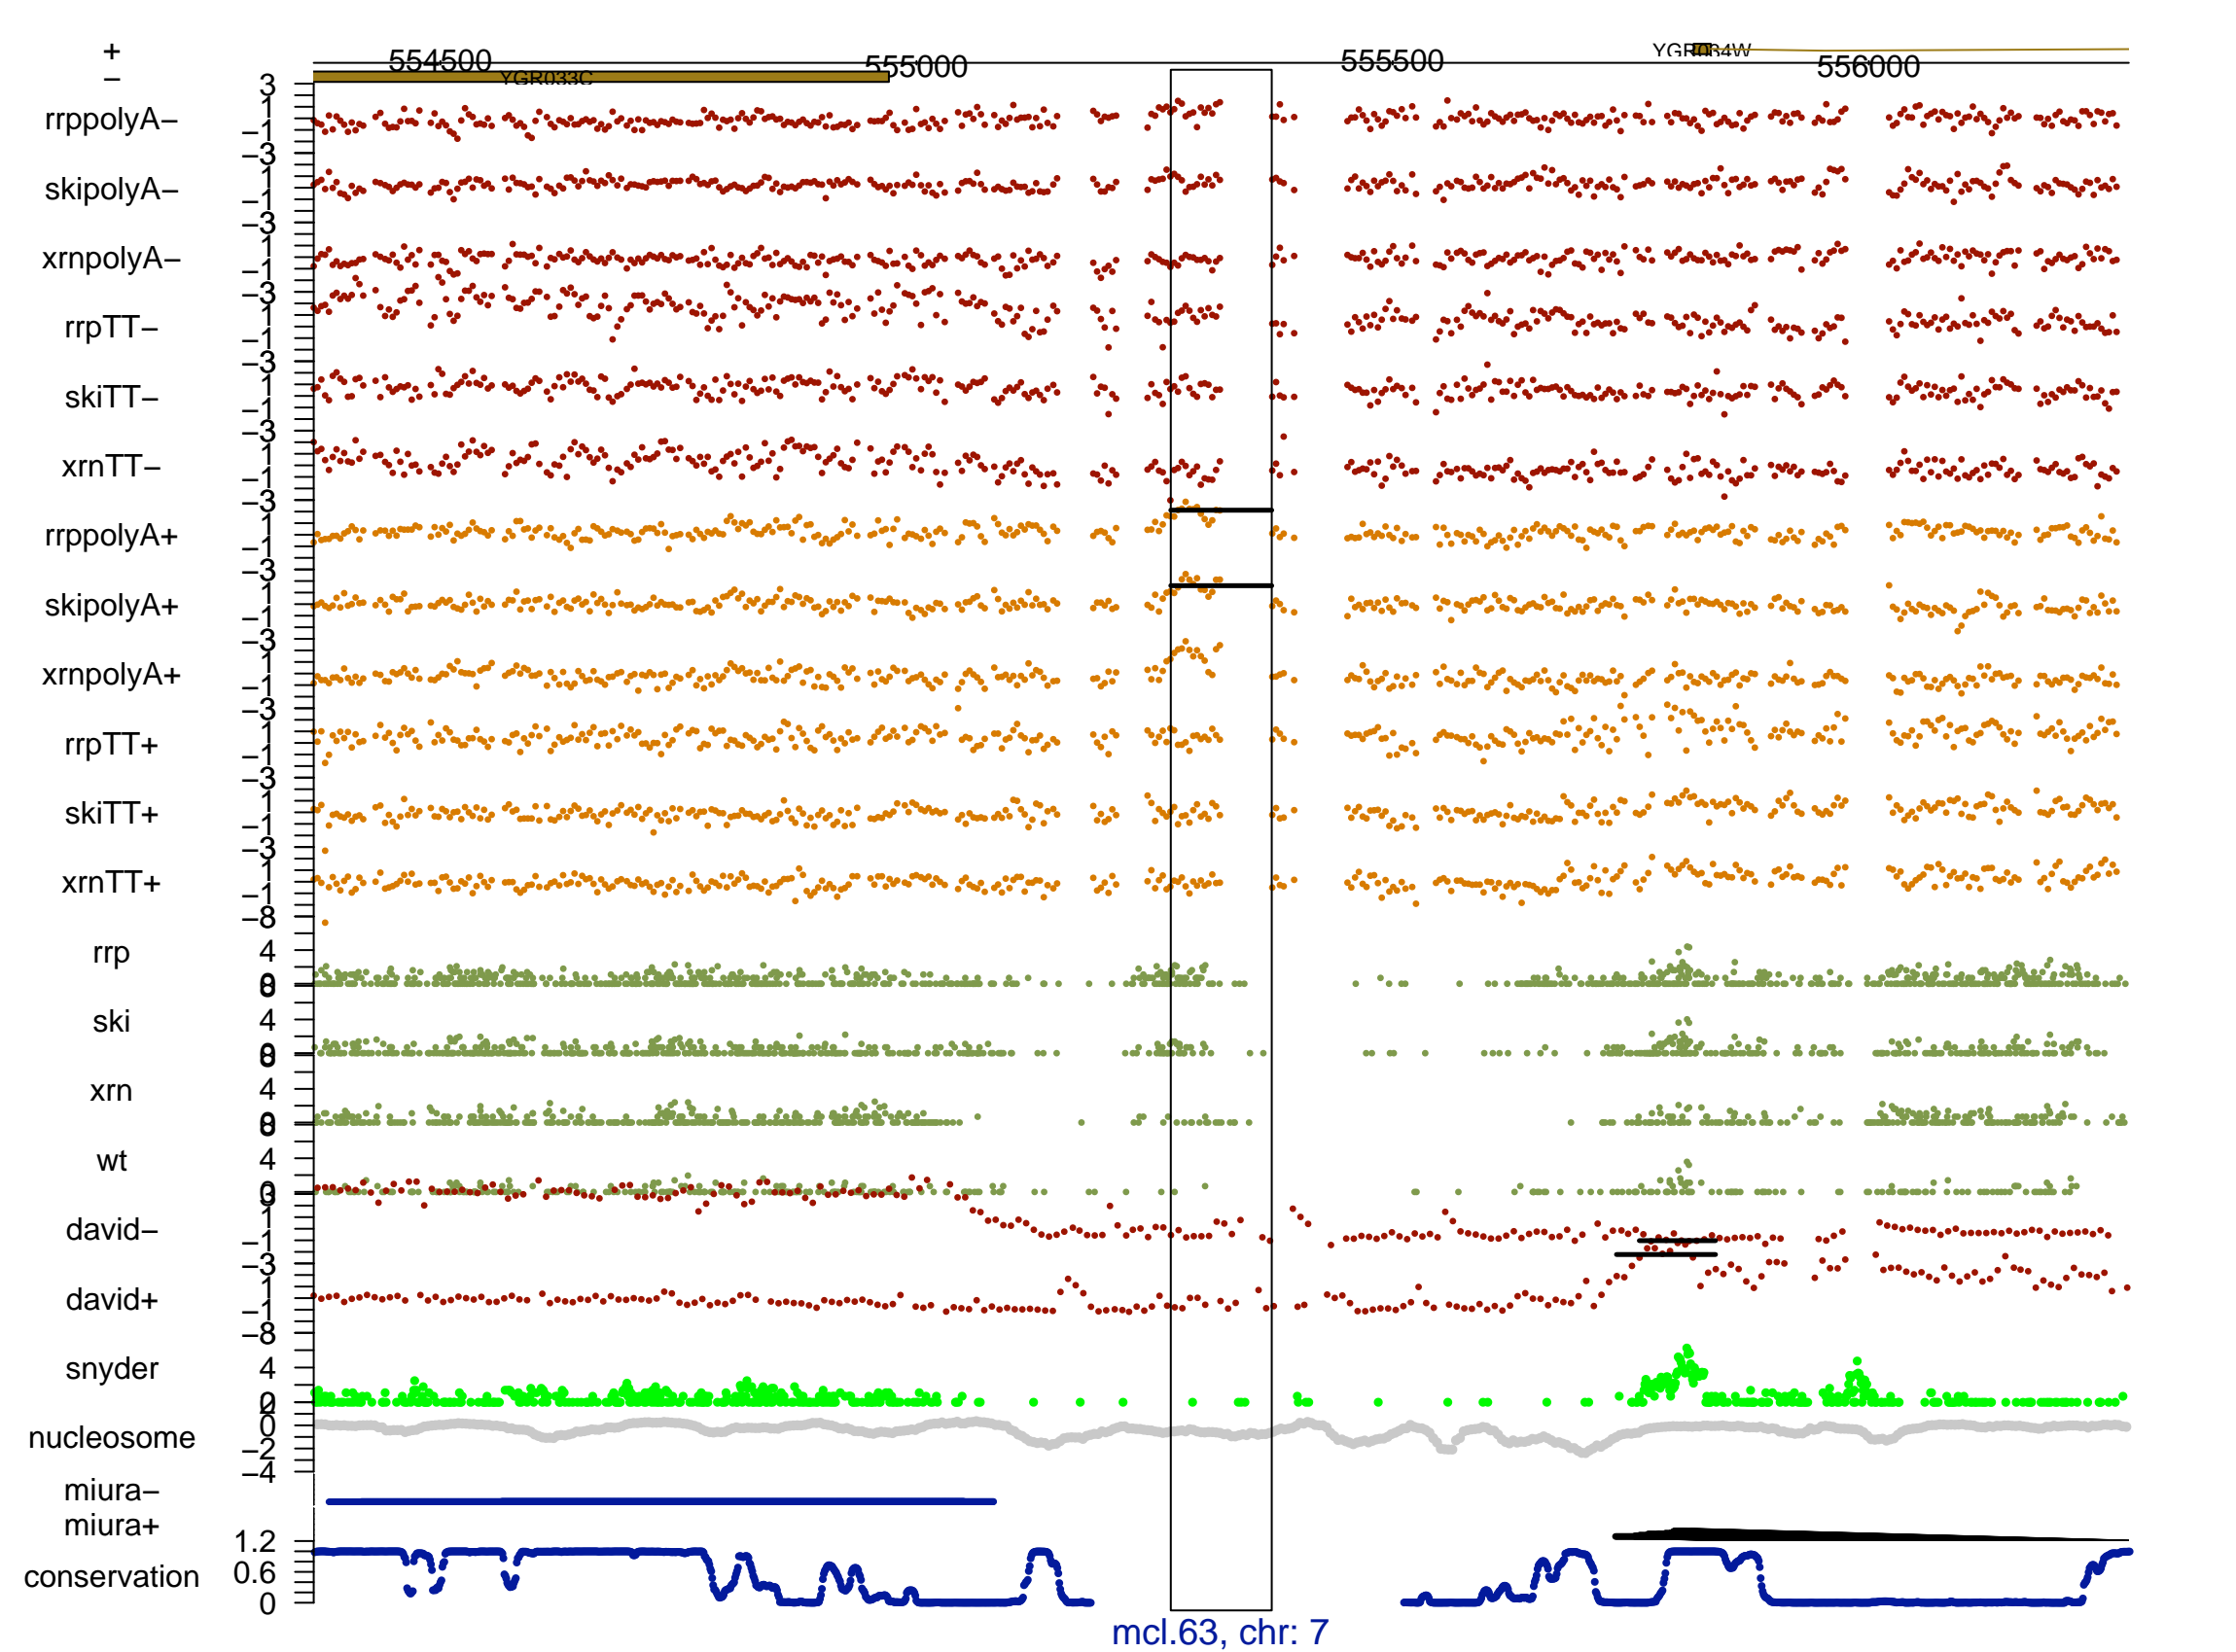

mcl.63, chr: 7

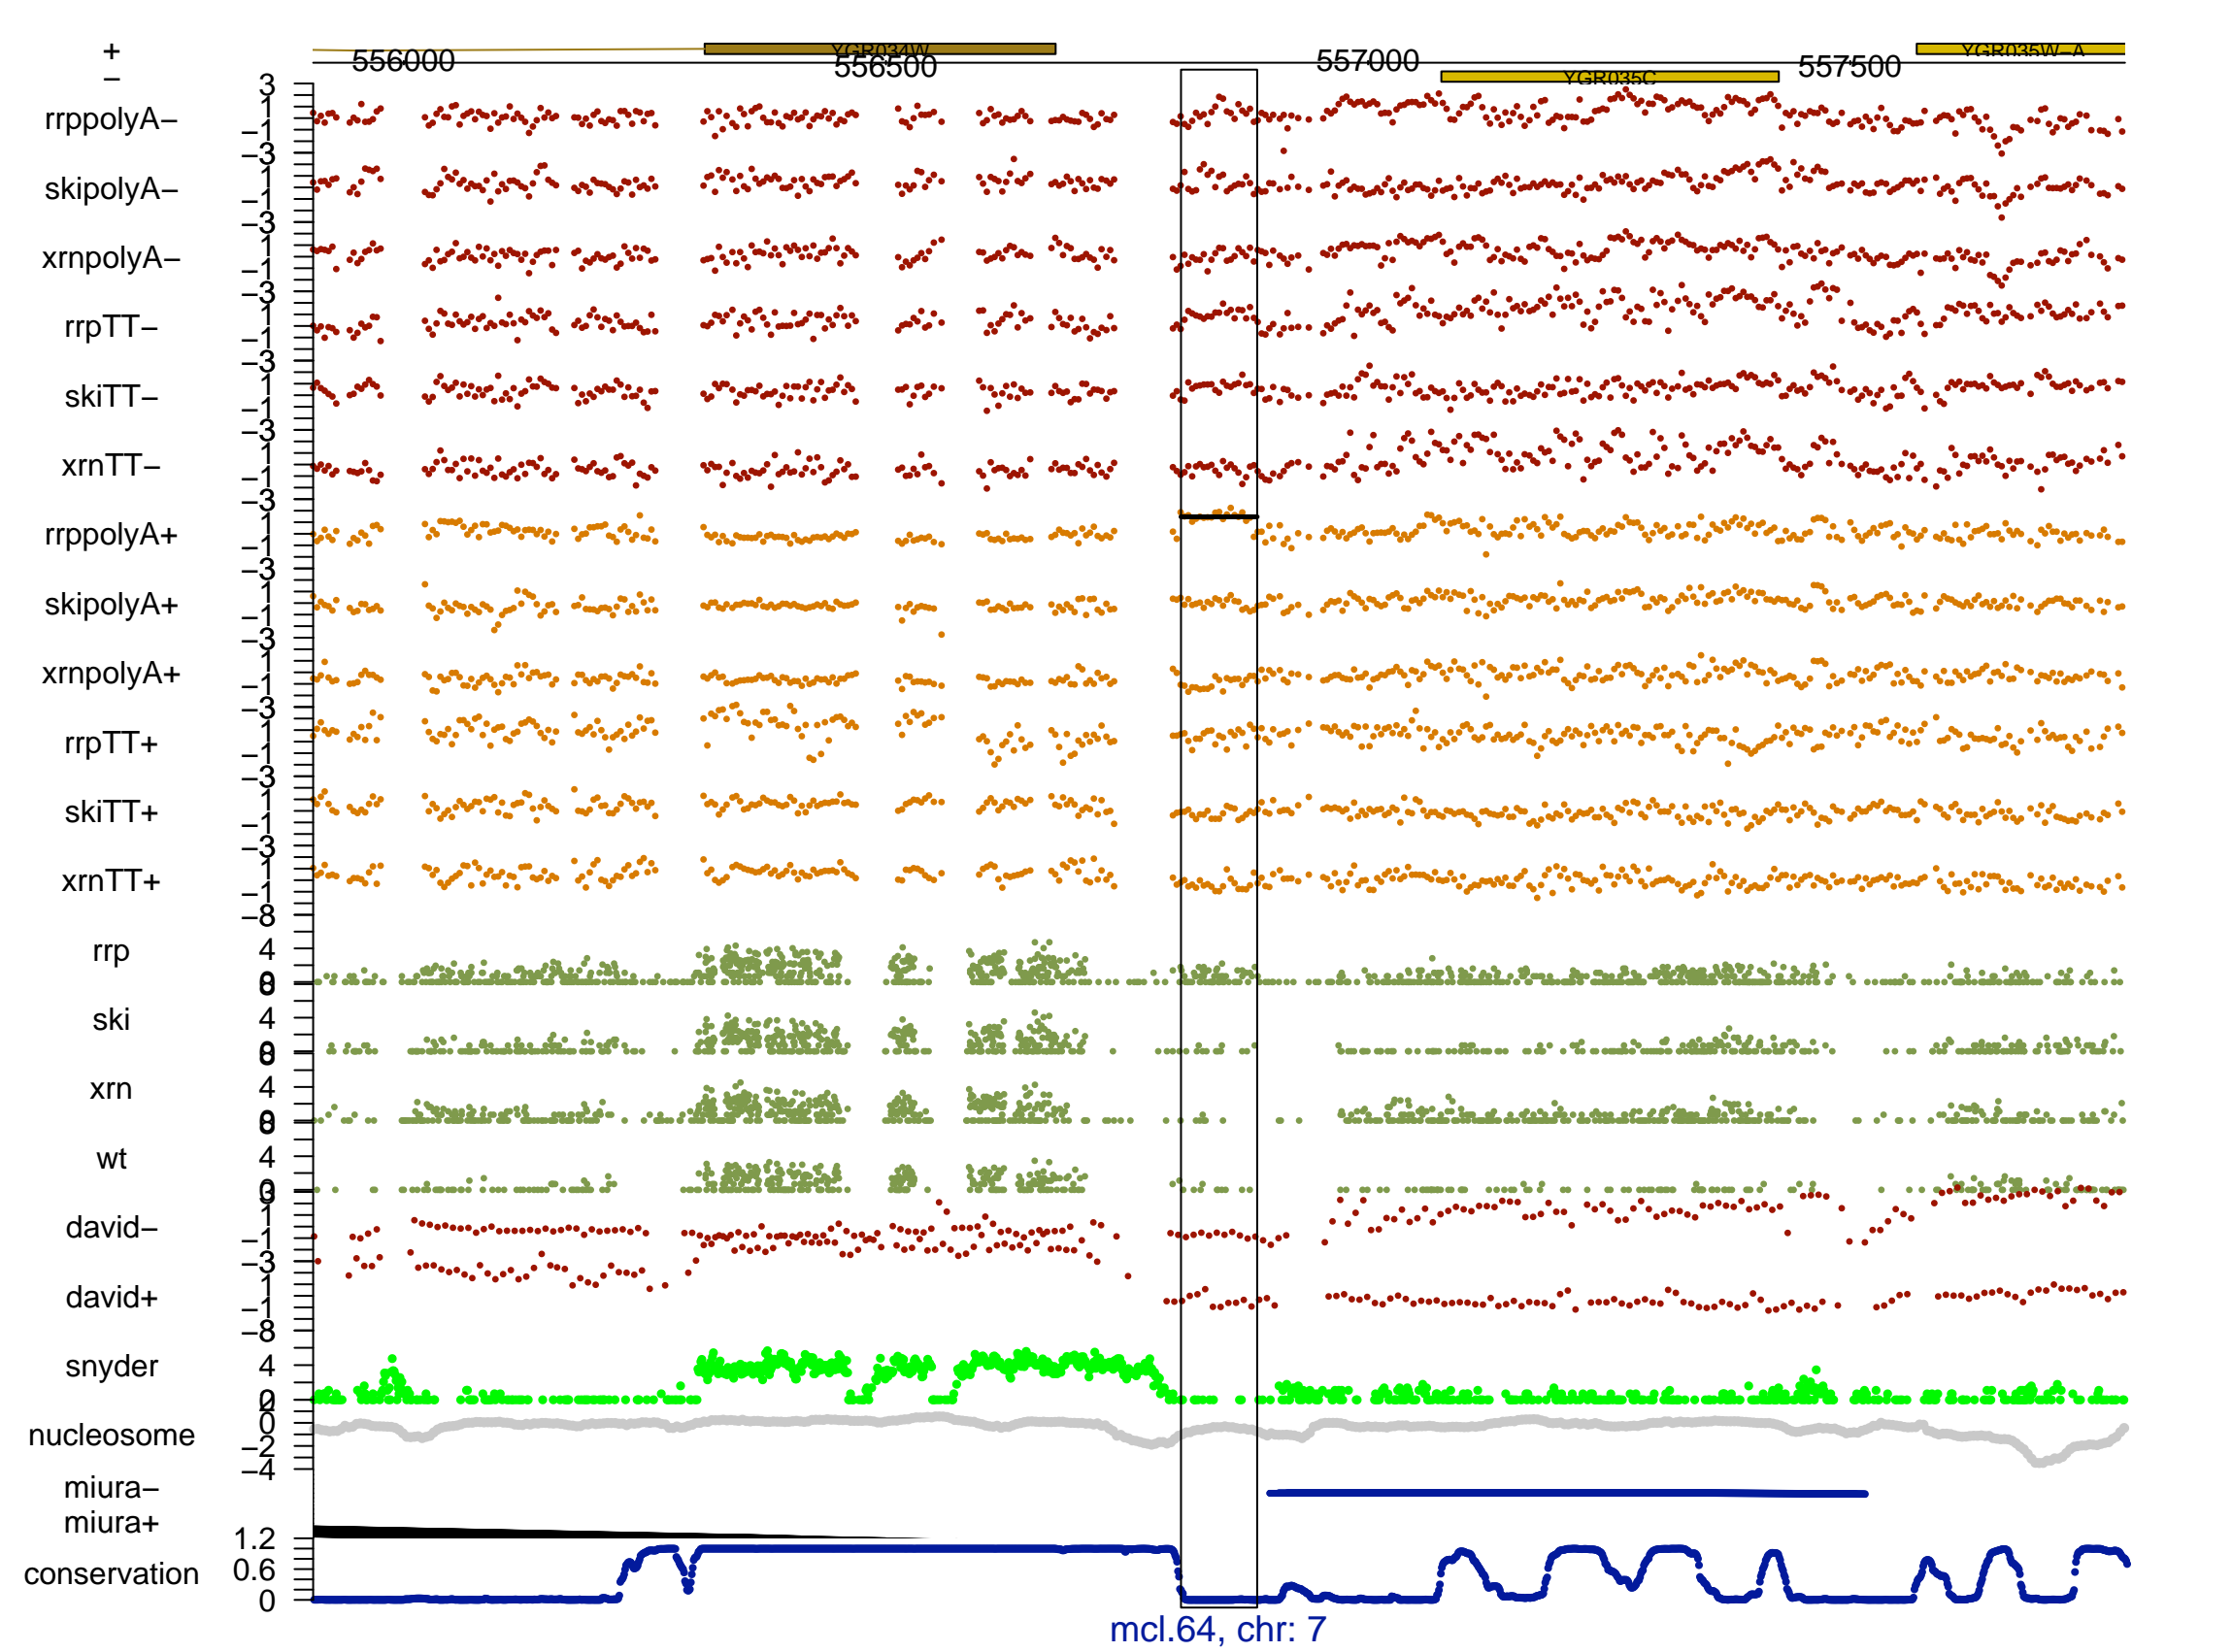



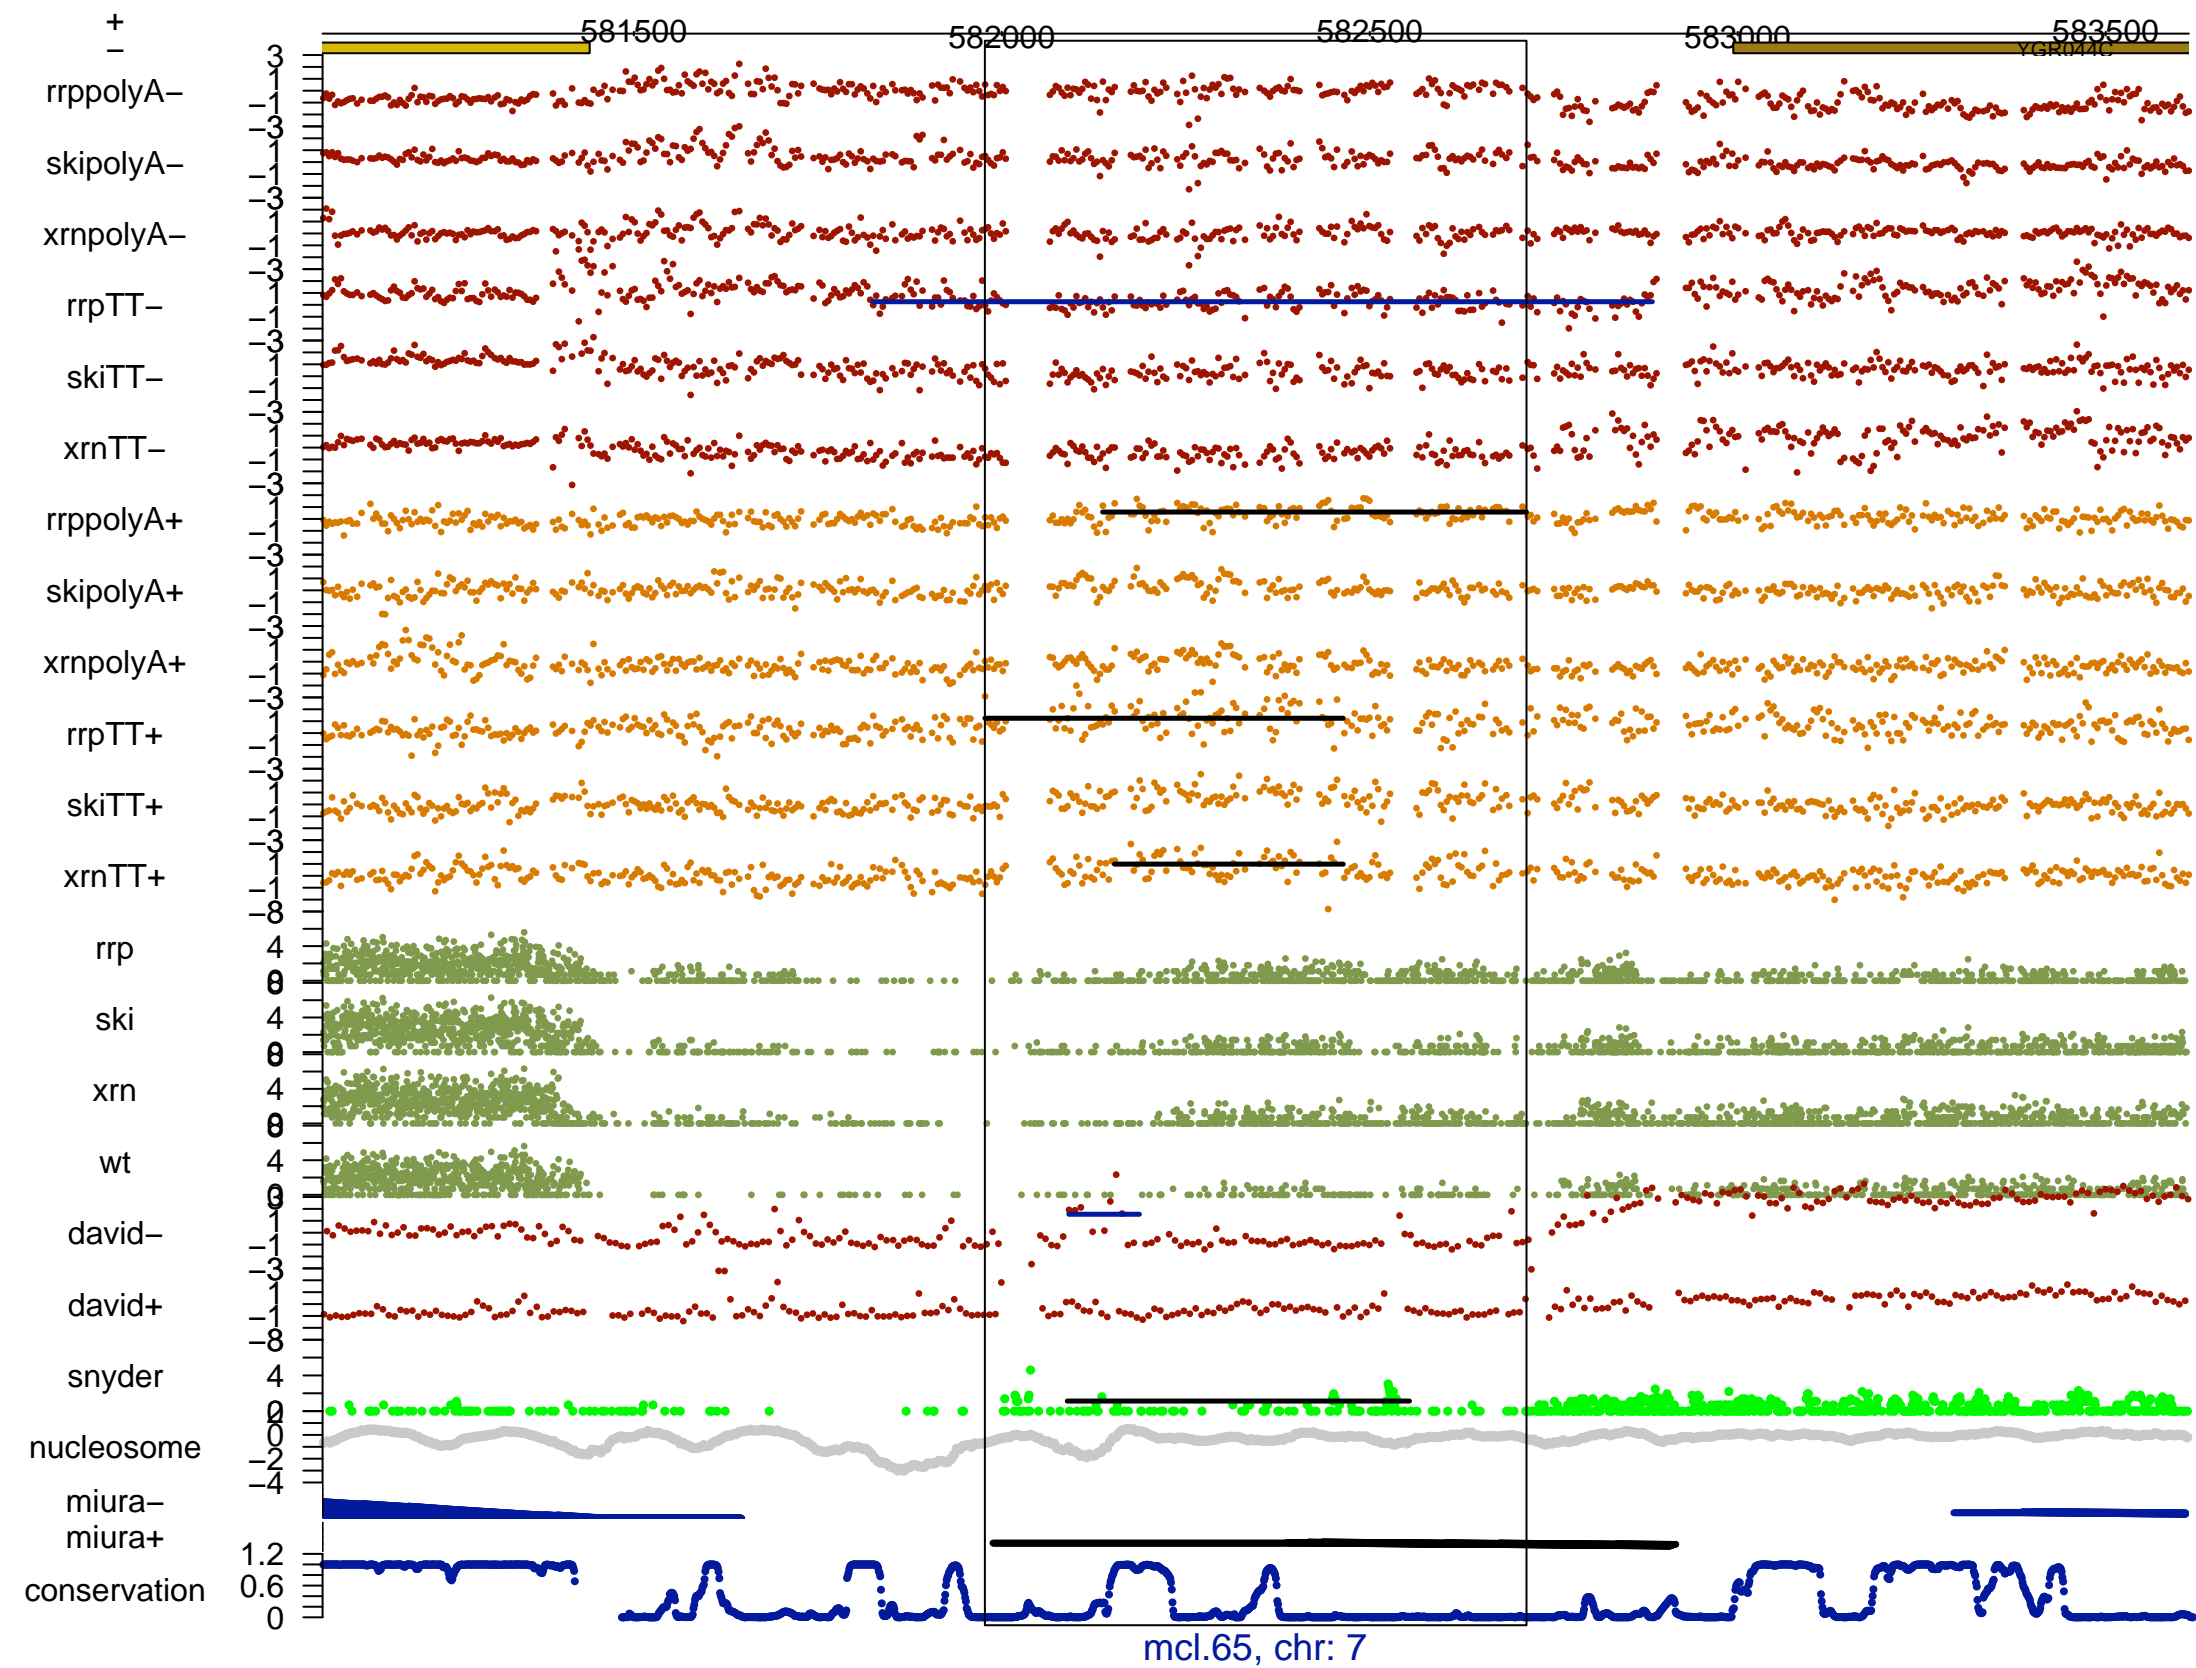

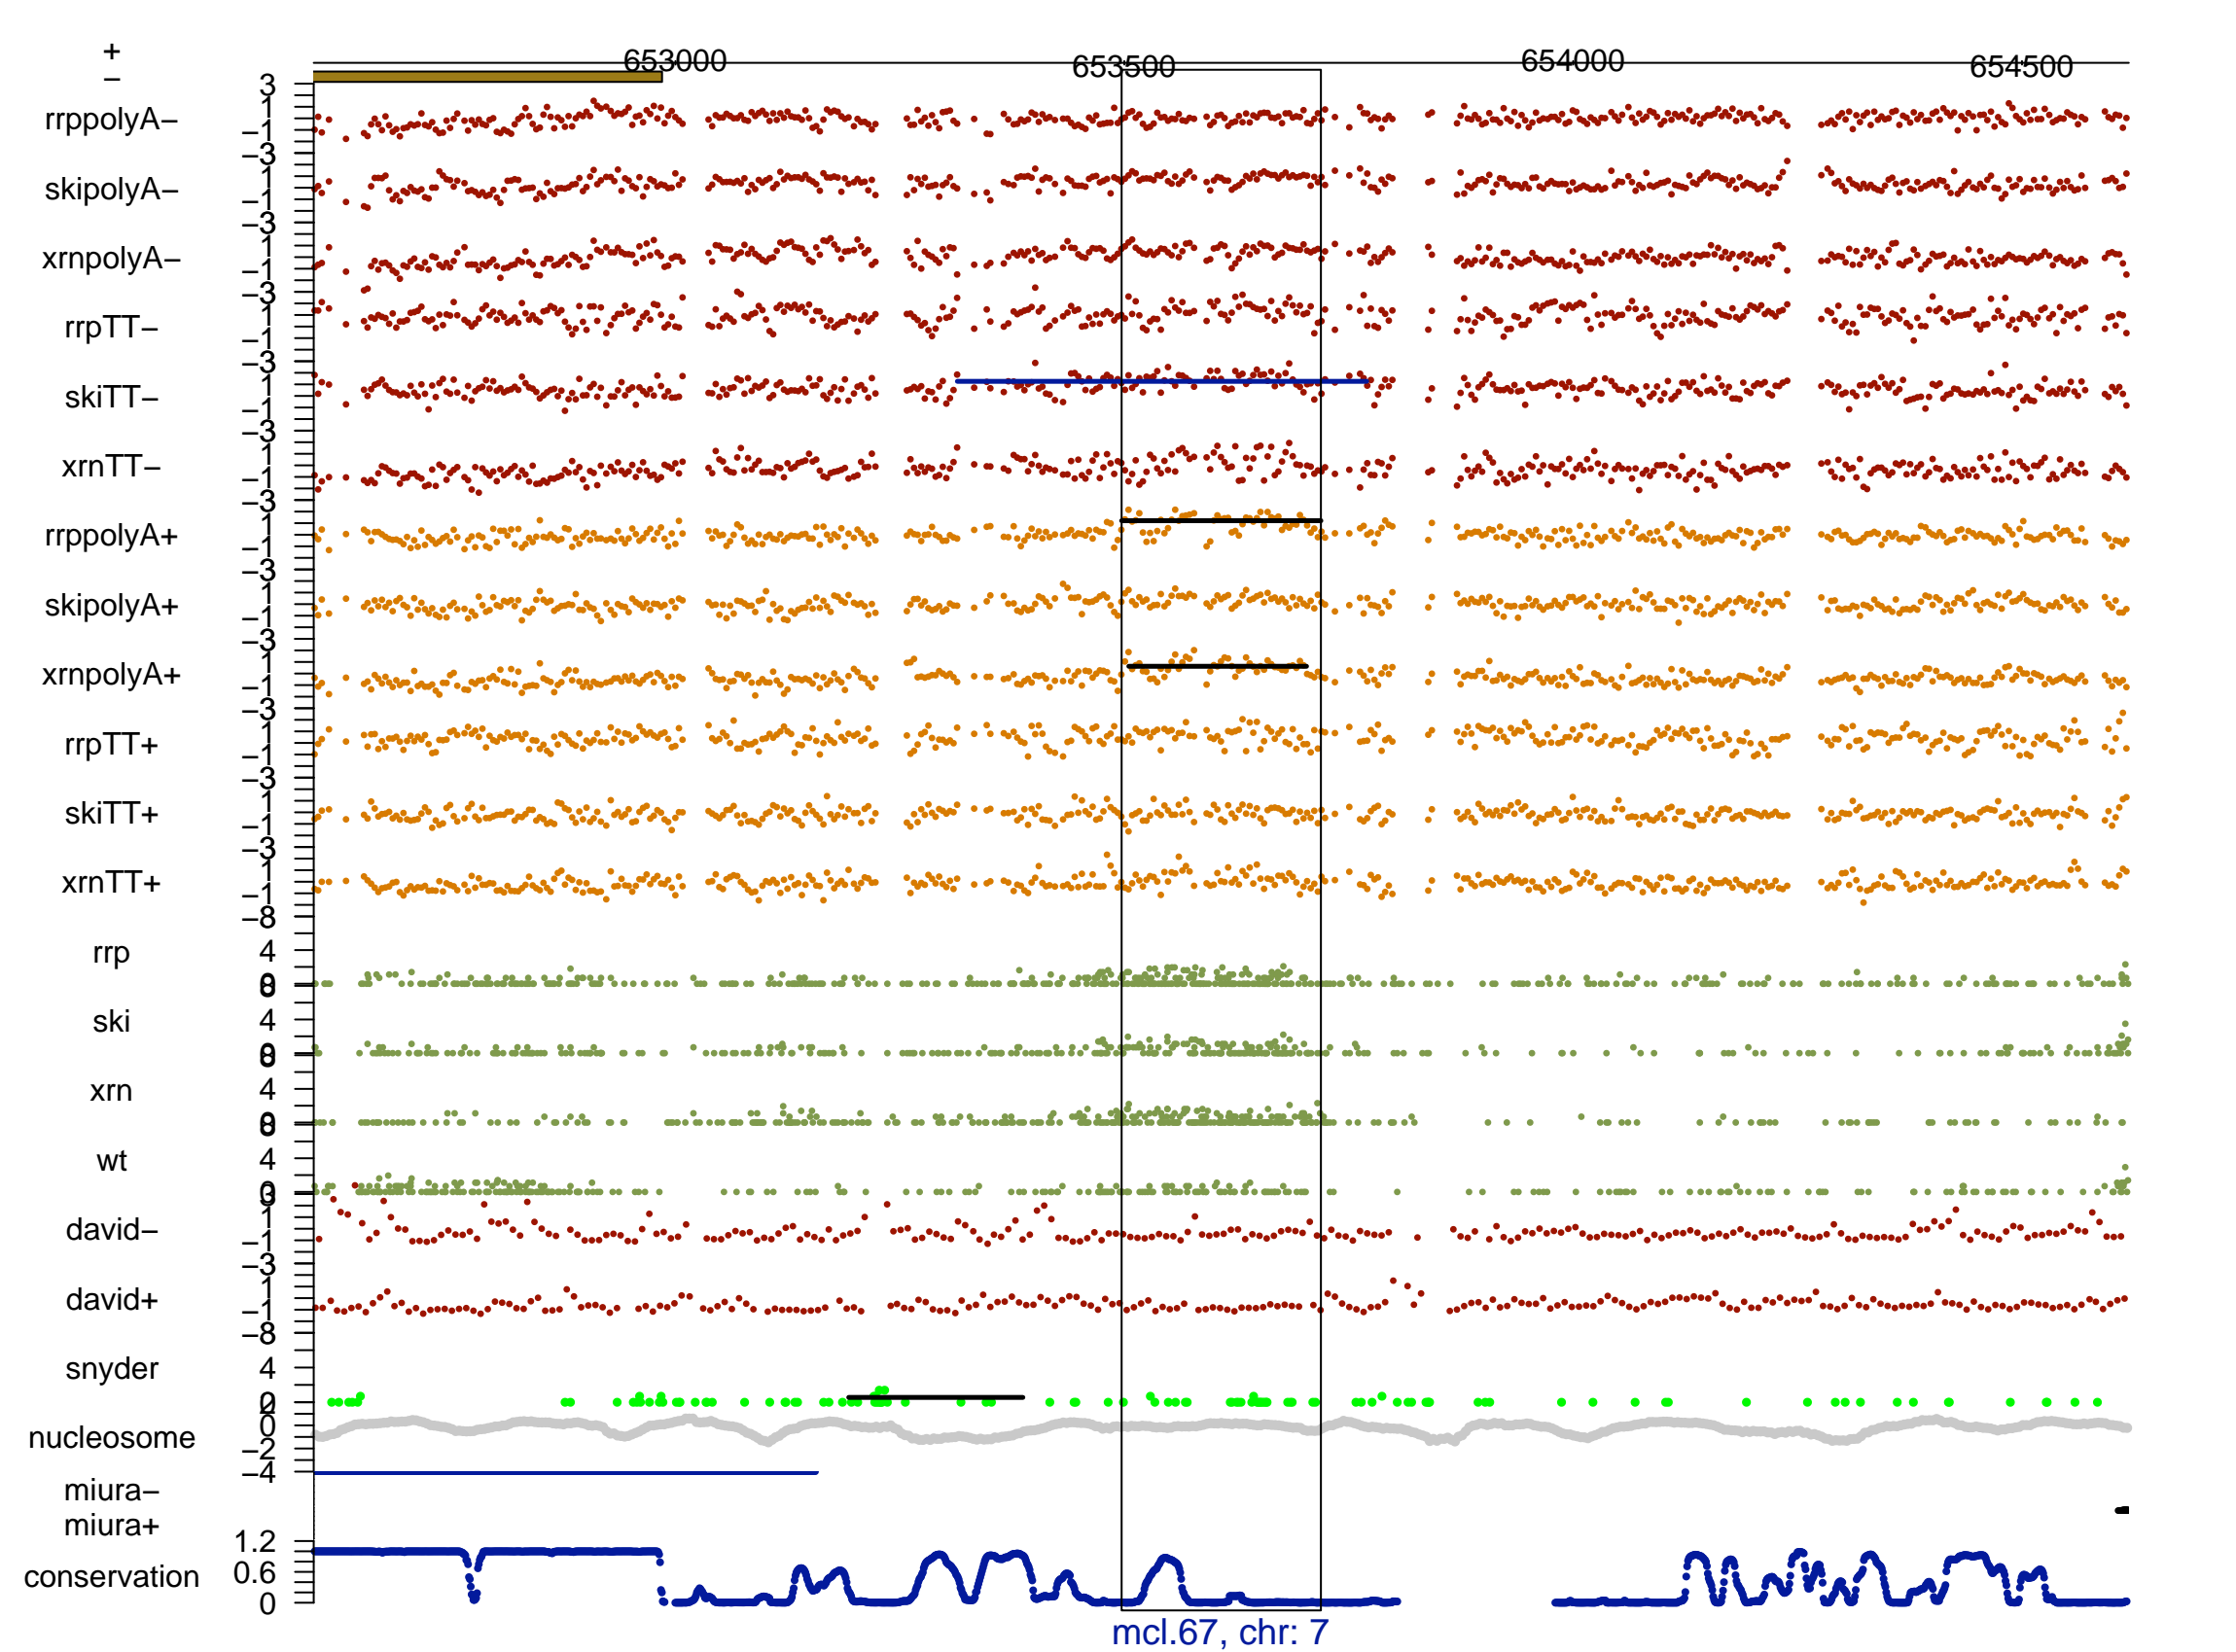

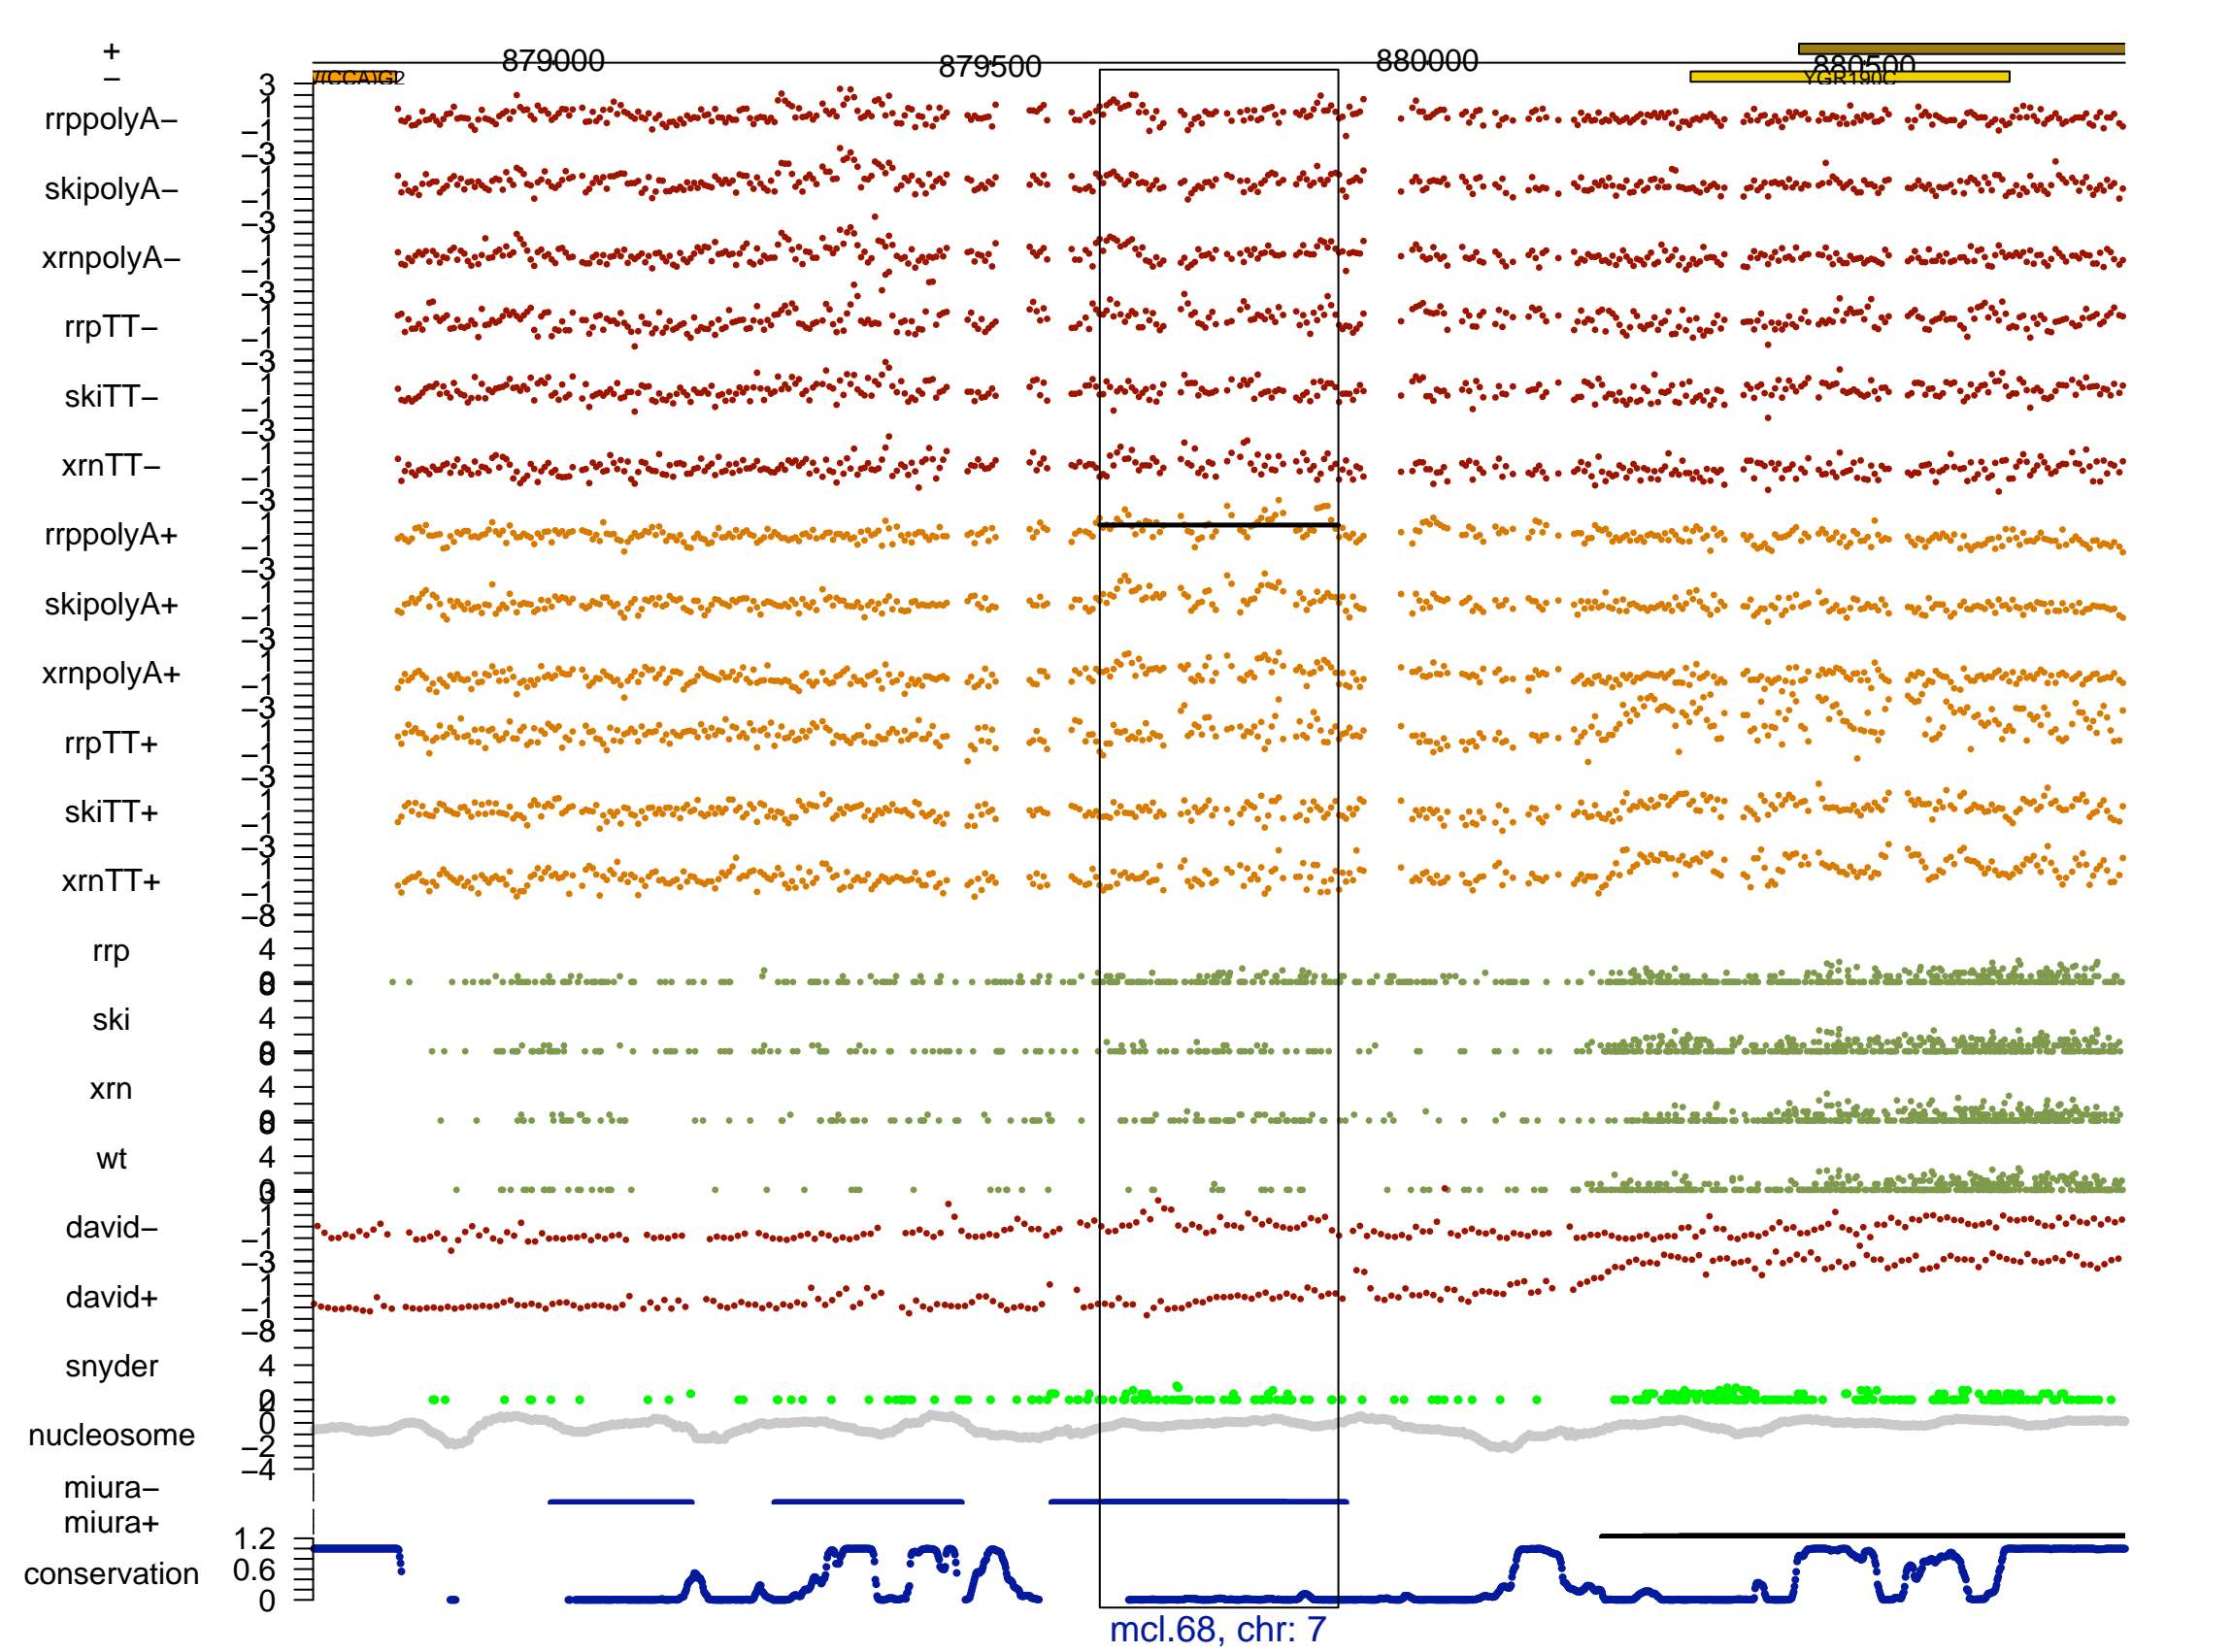

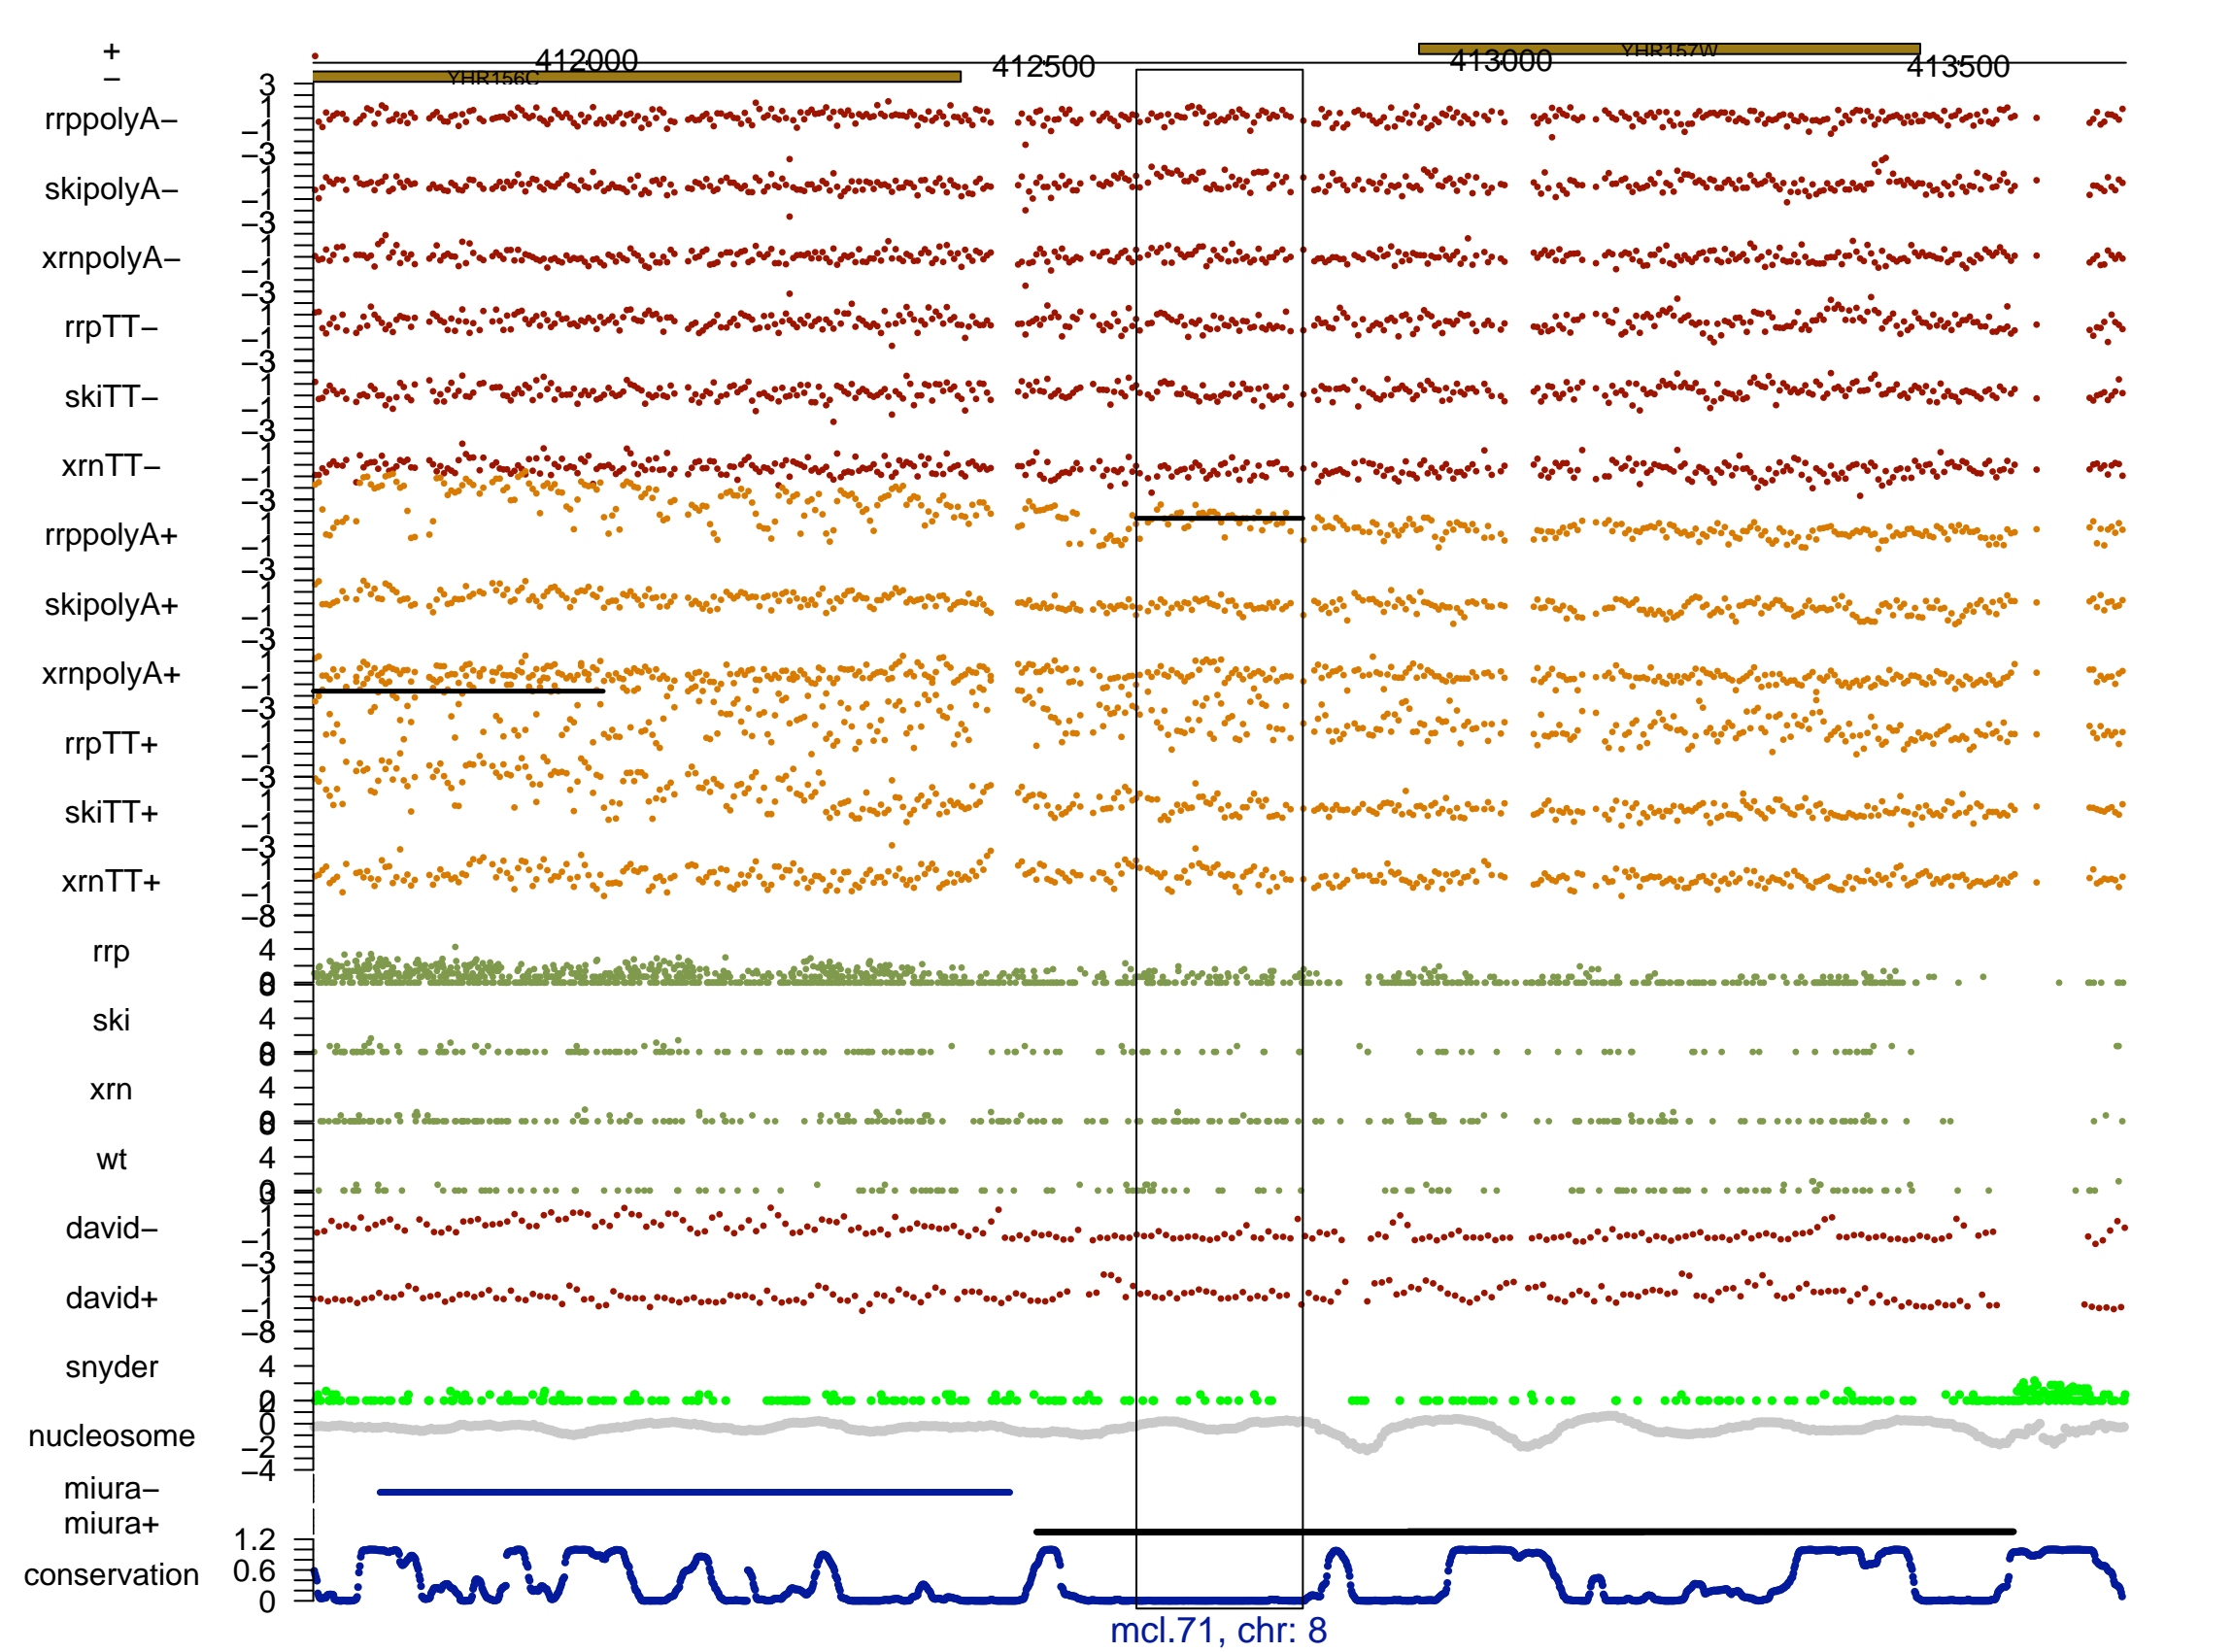



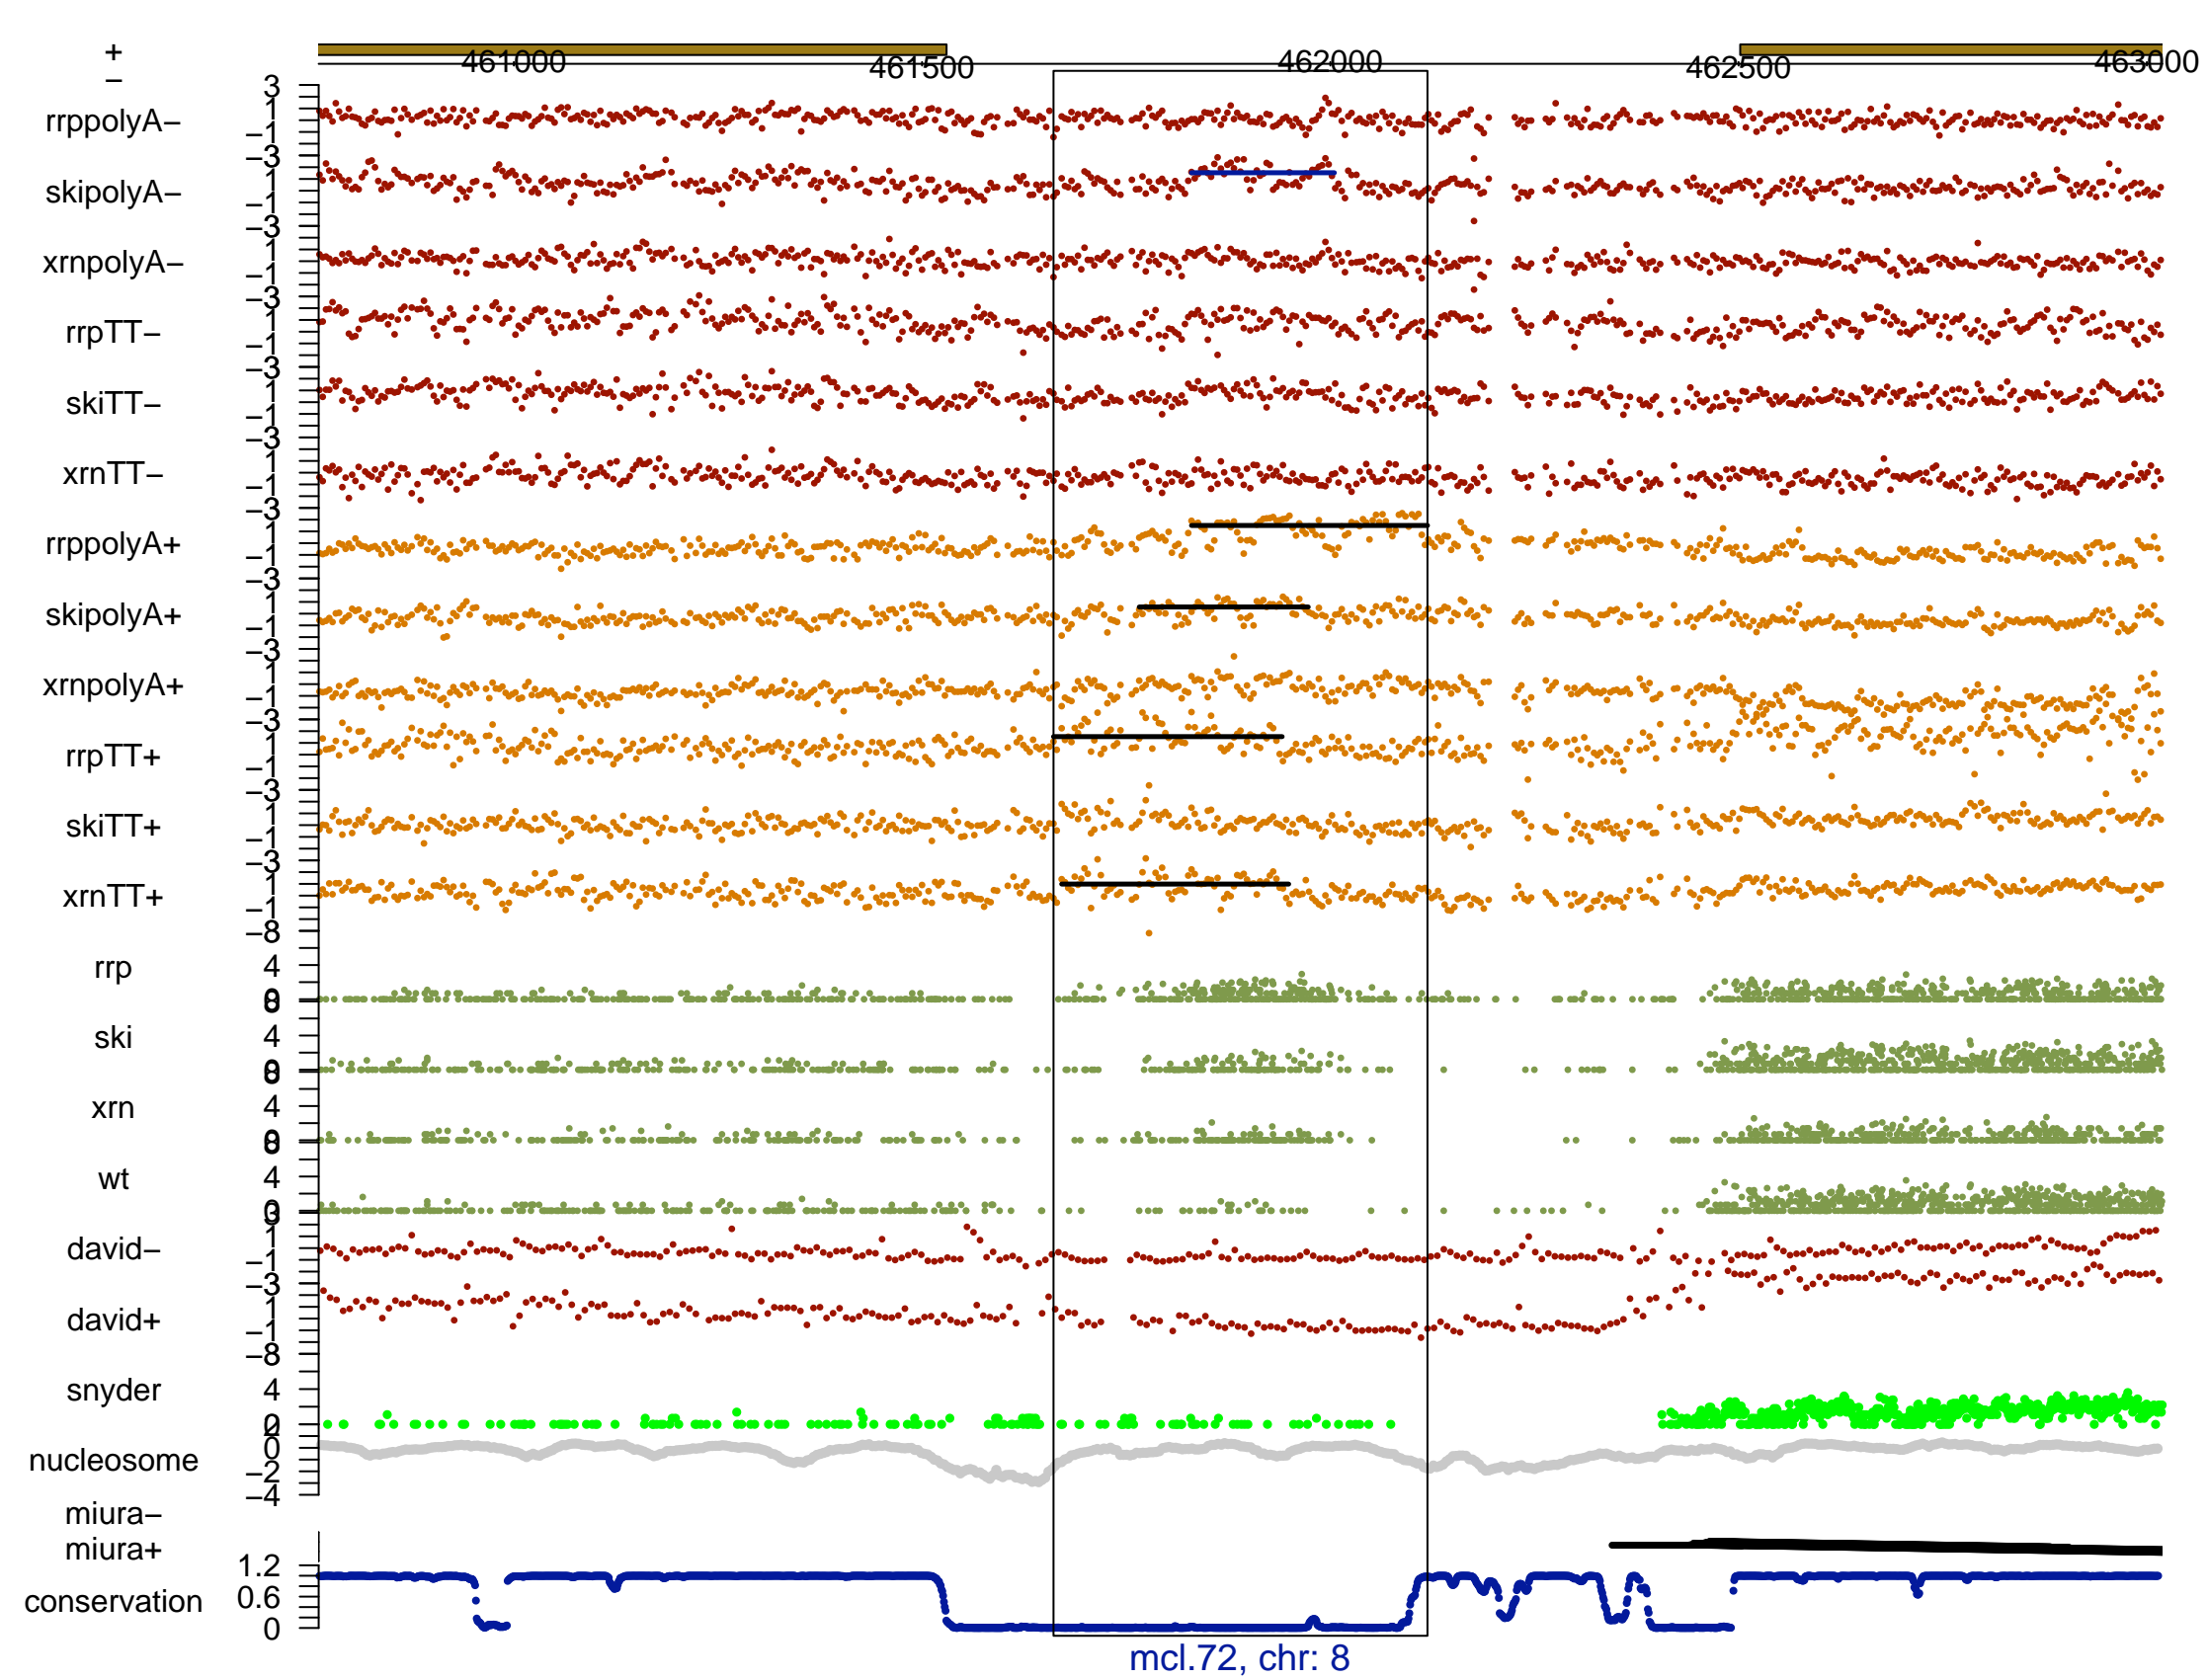



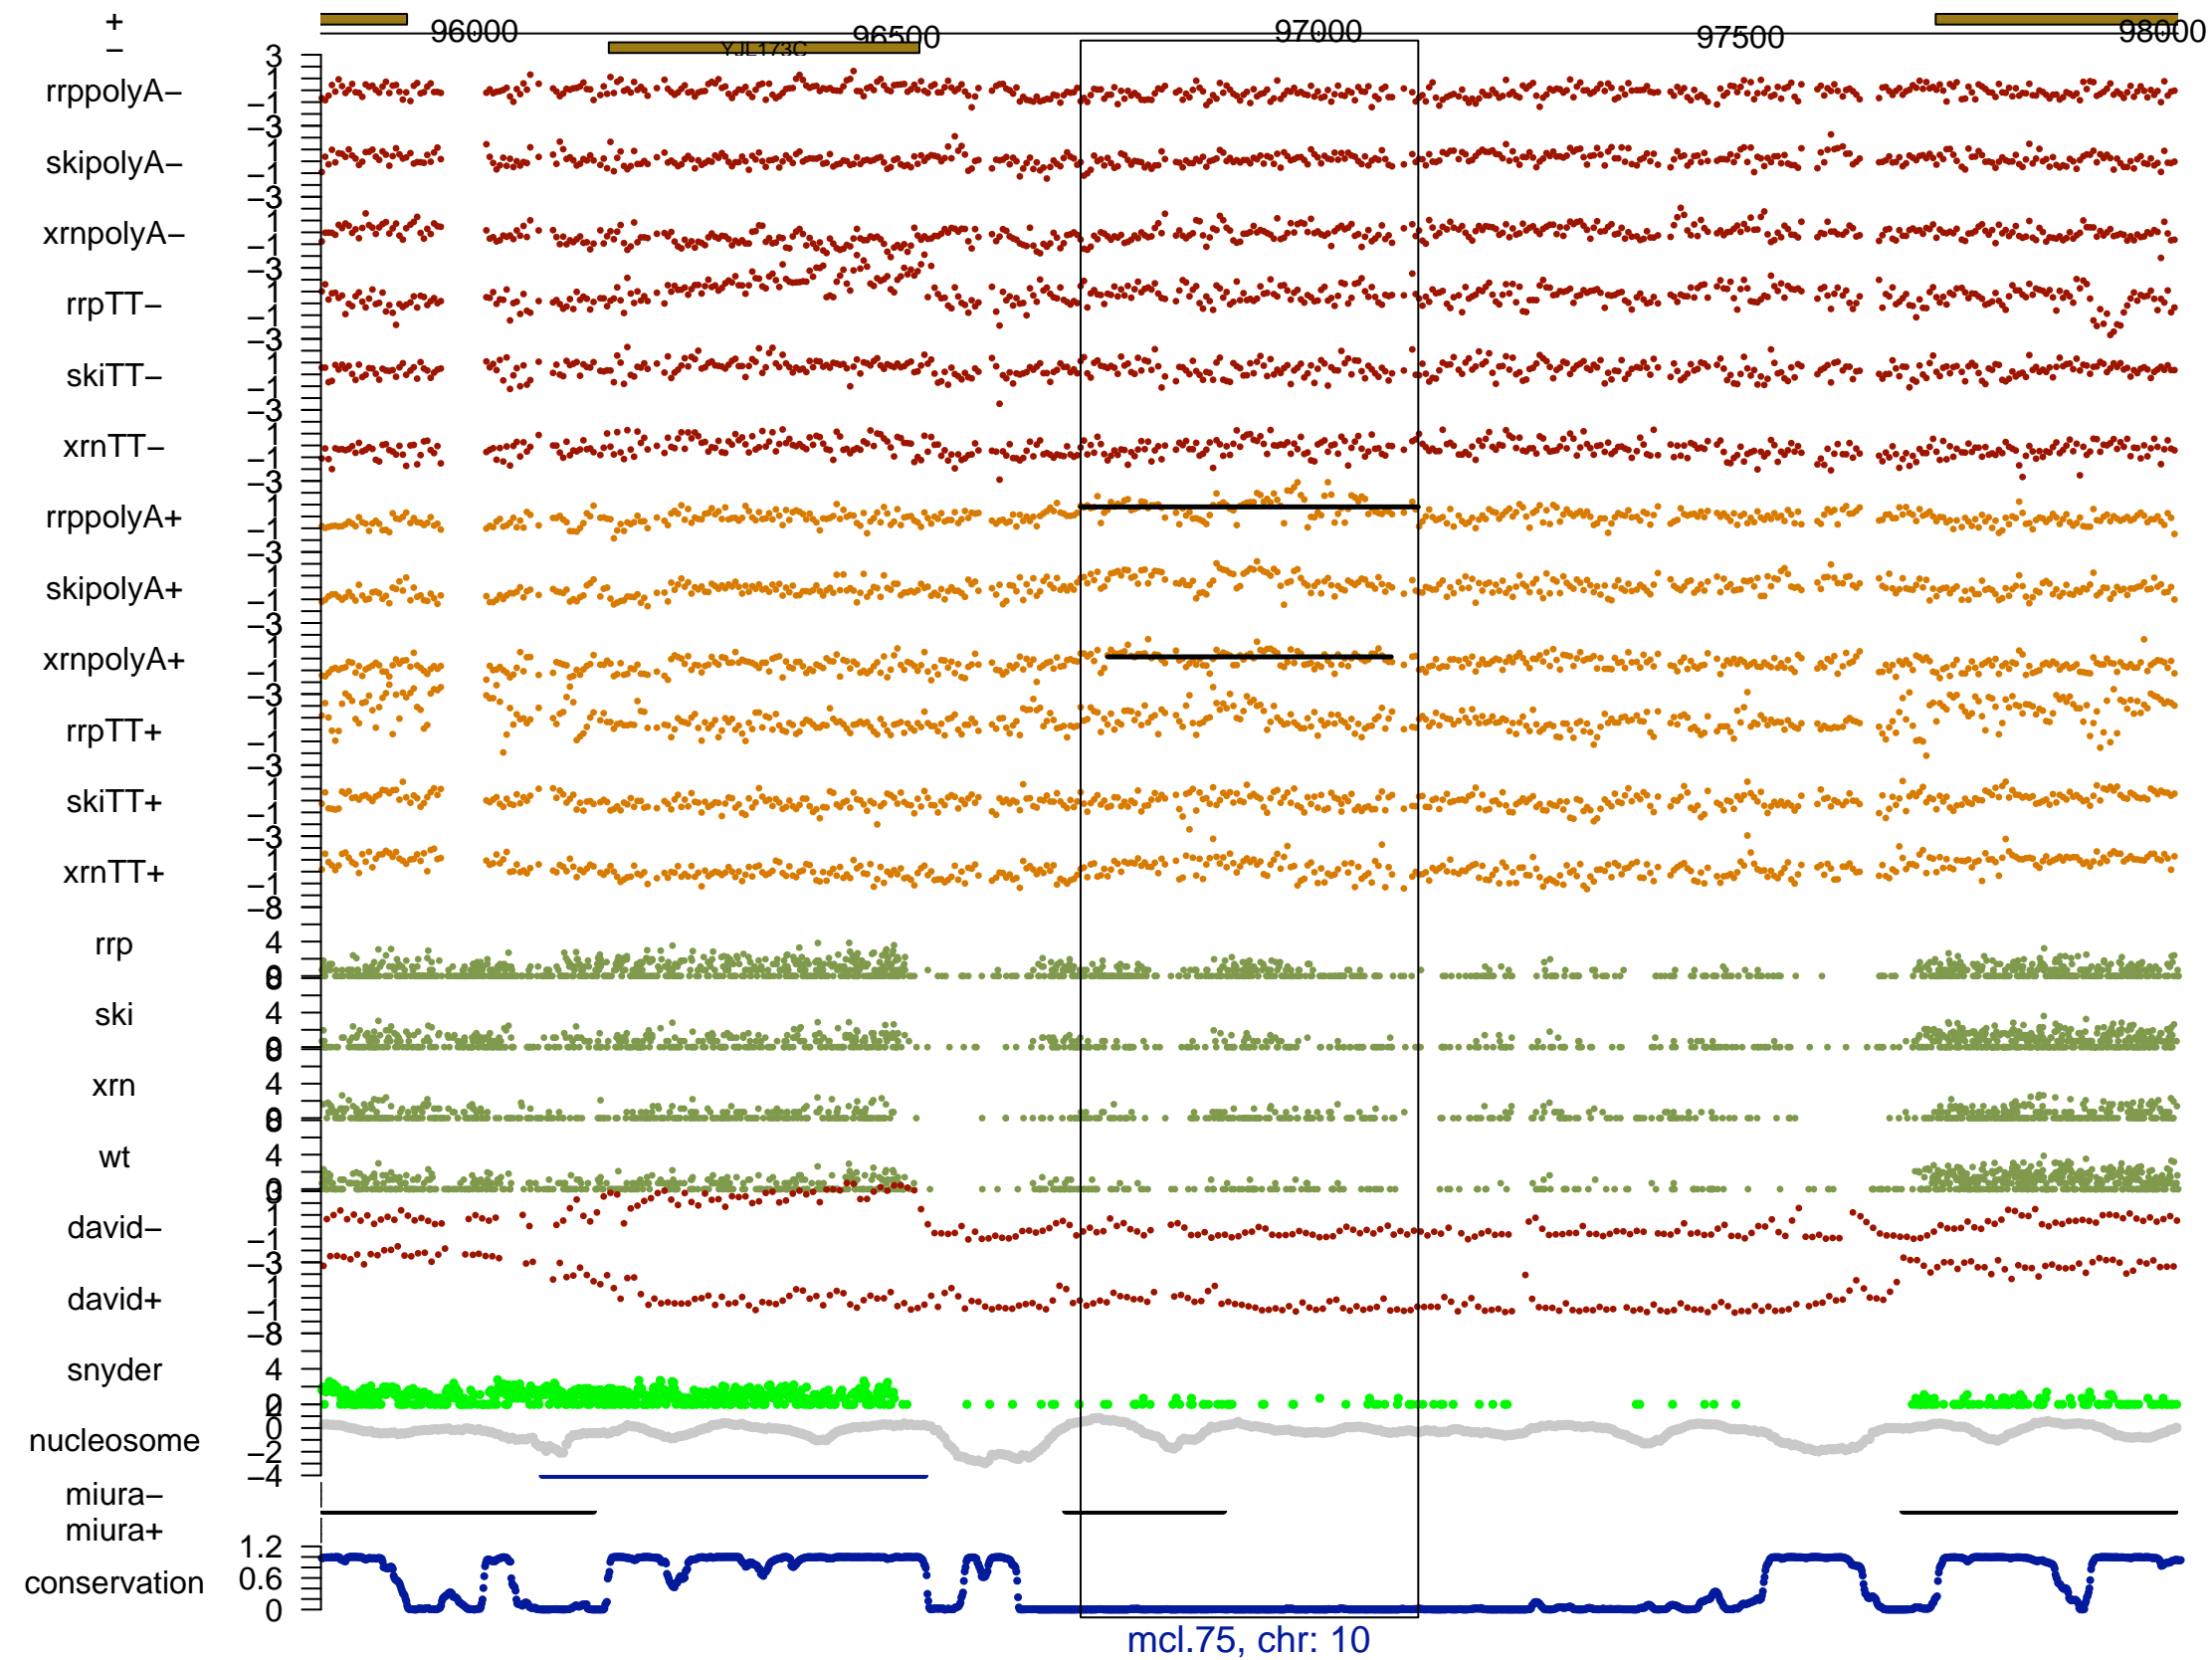

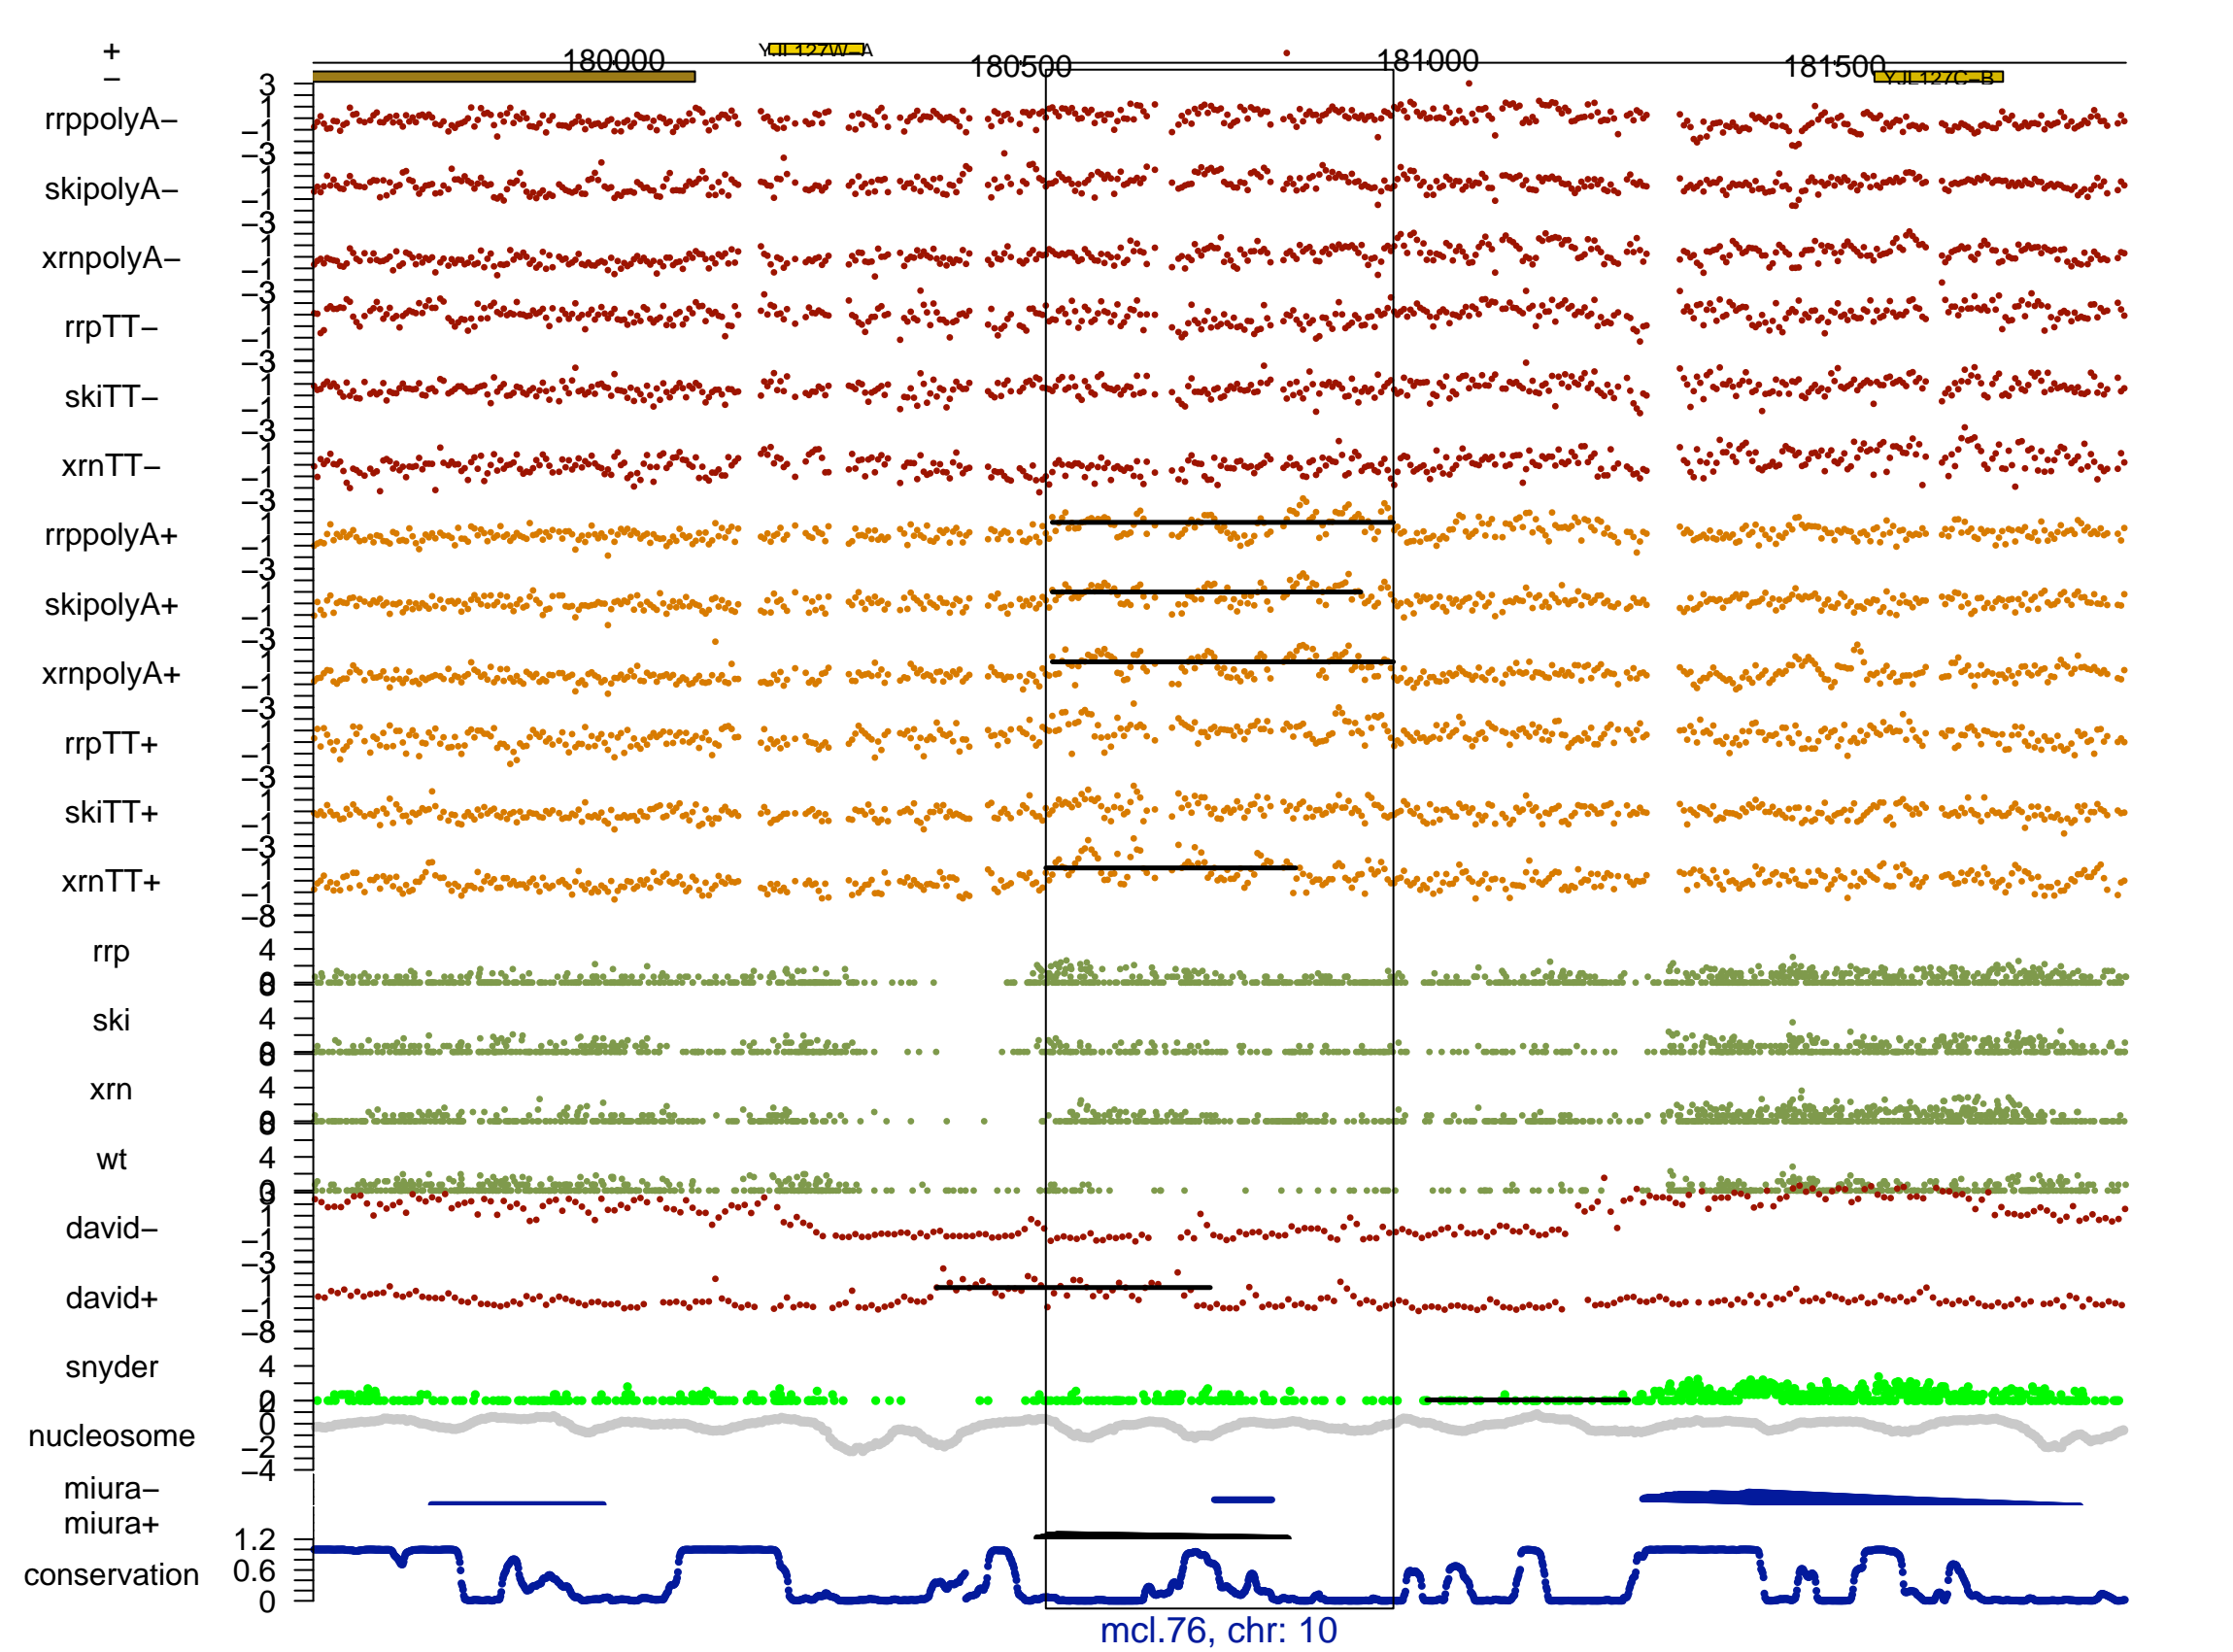



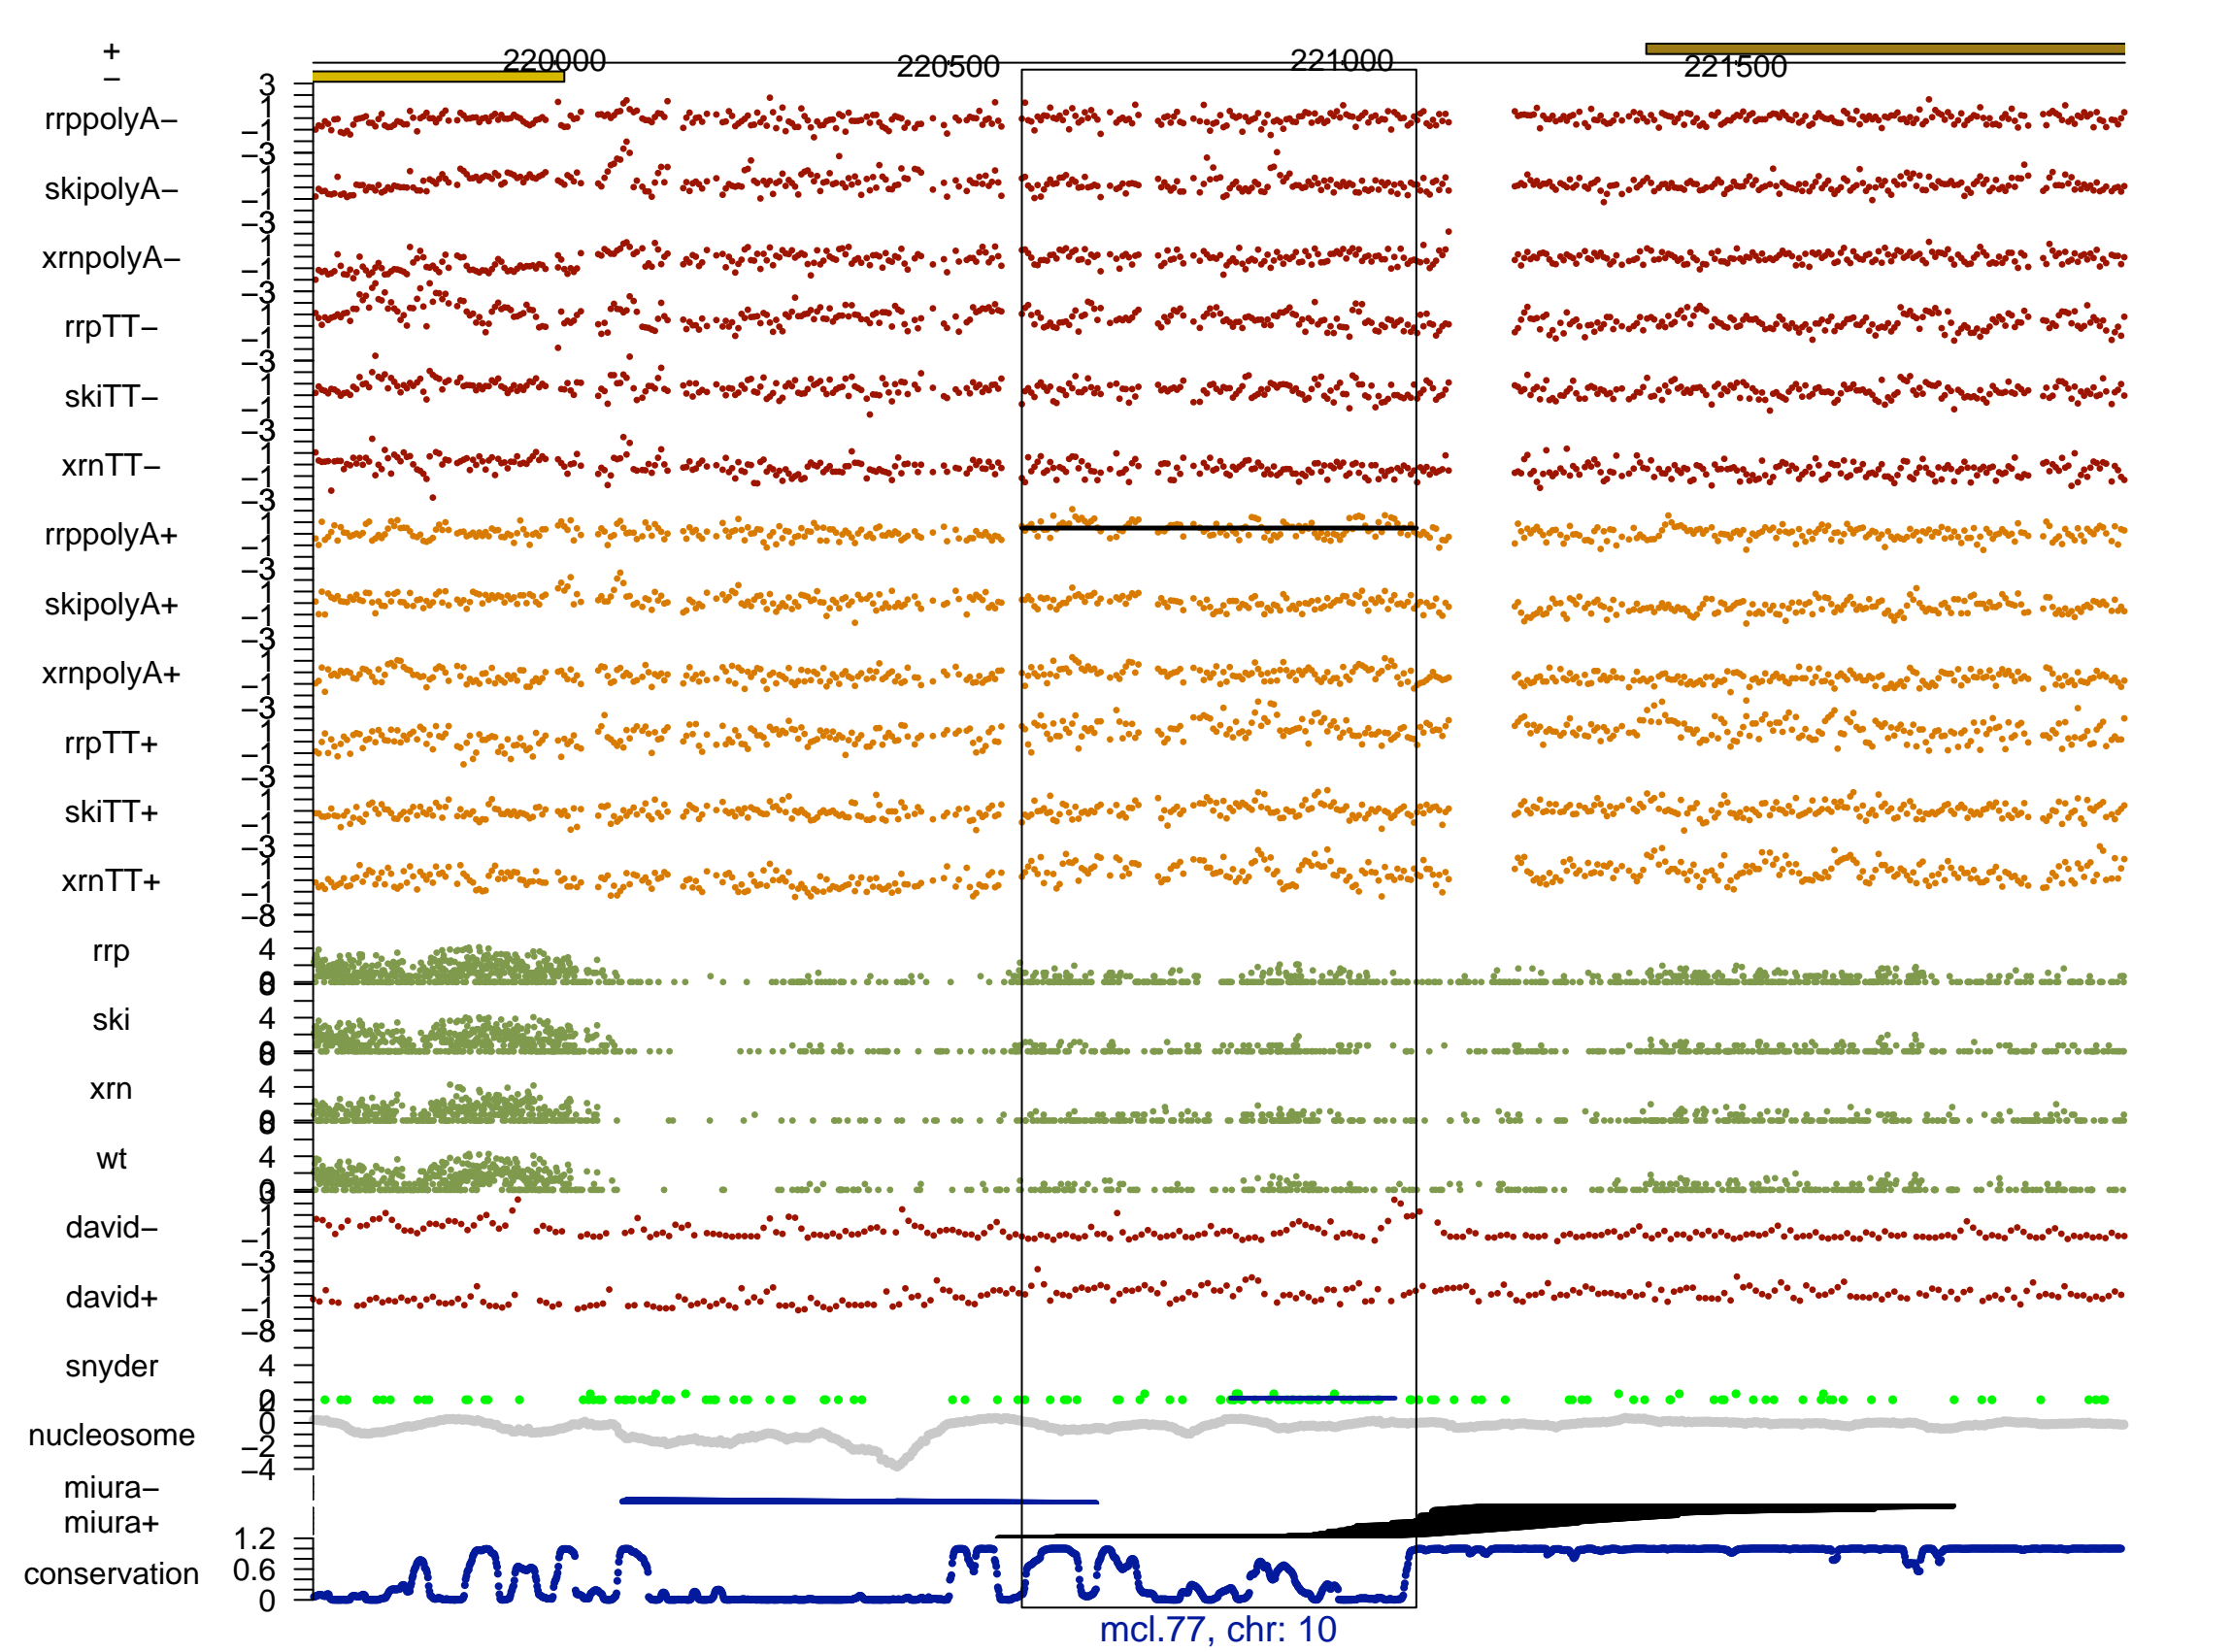



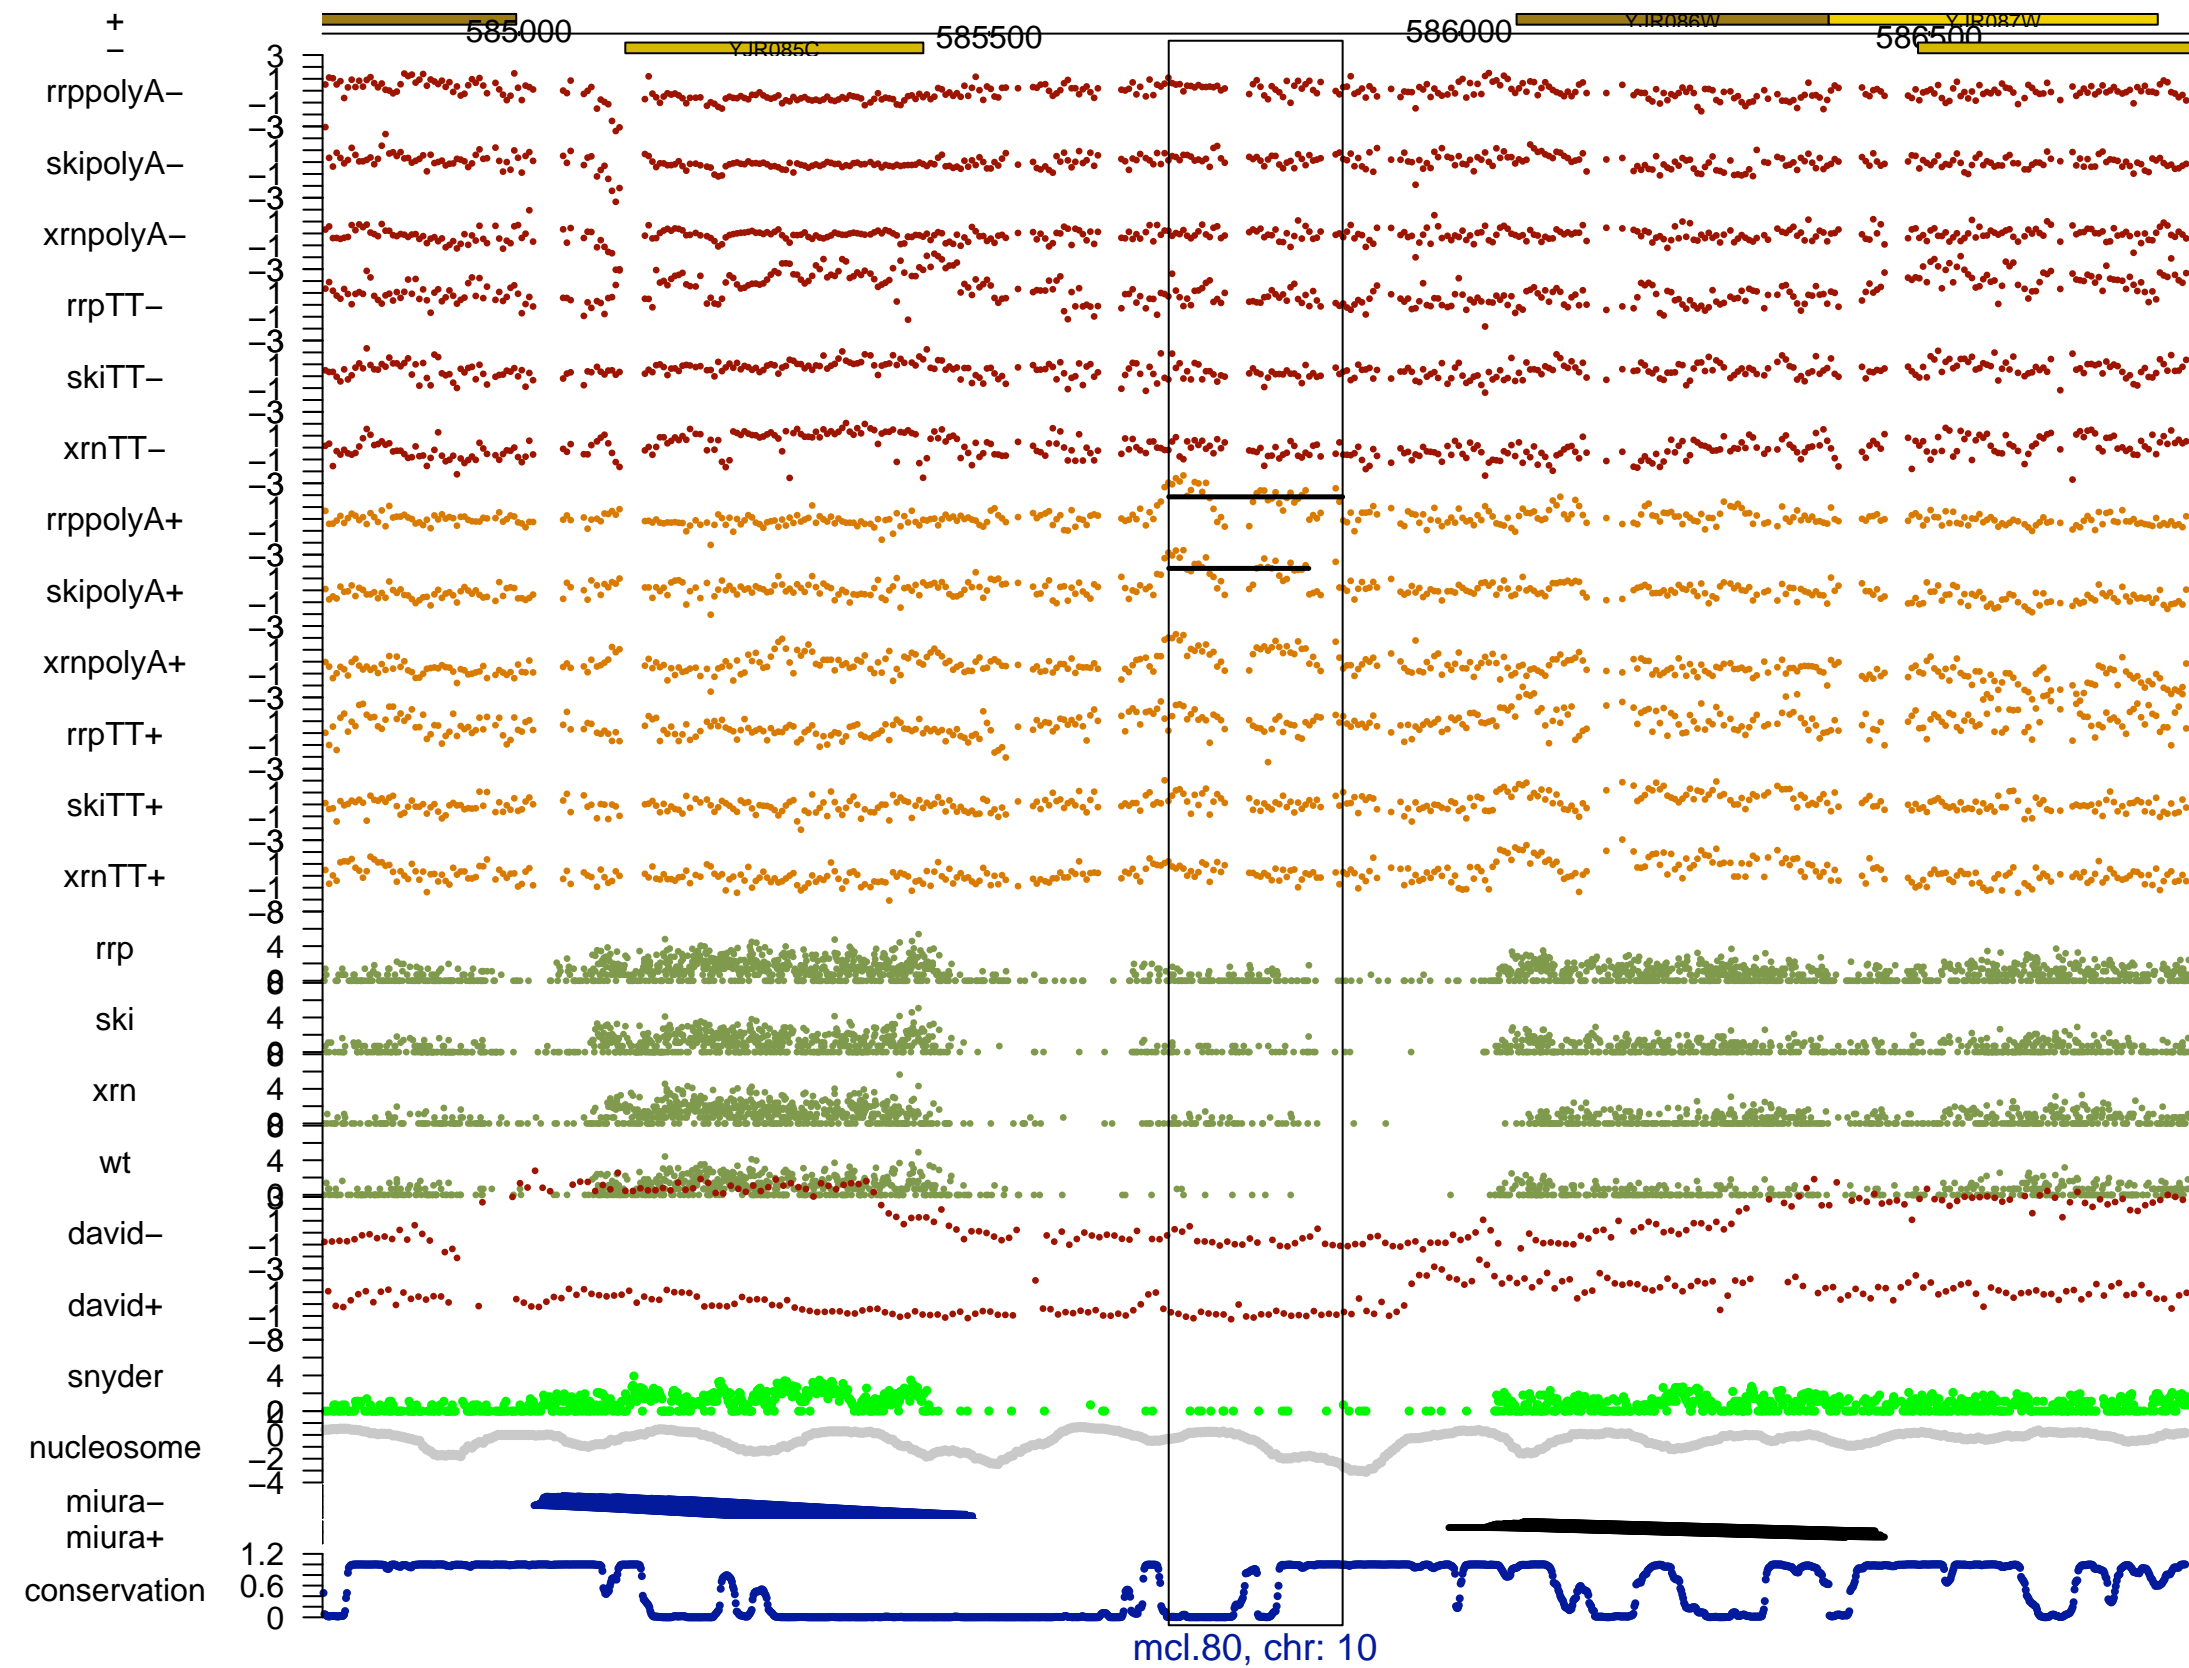





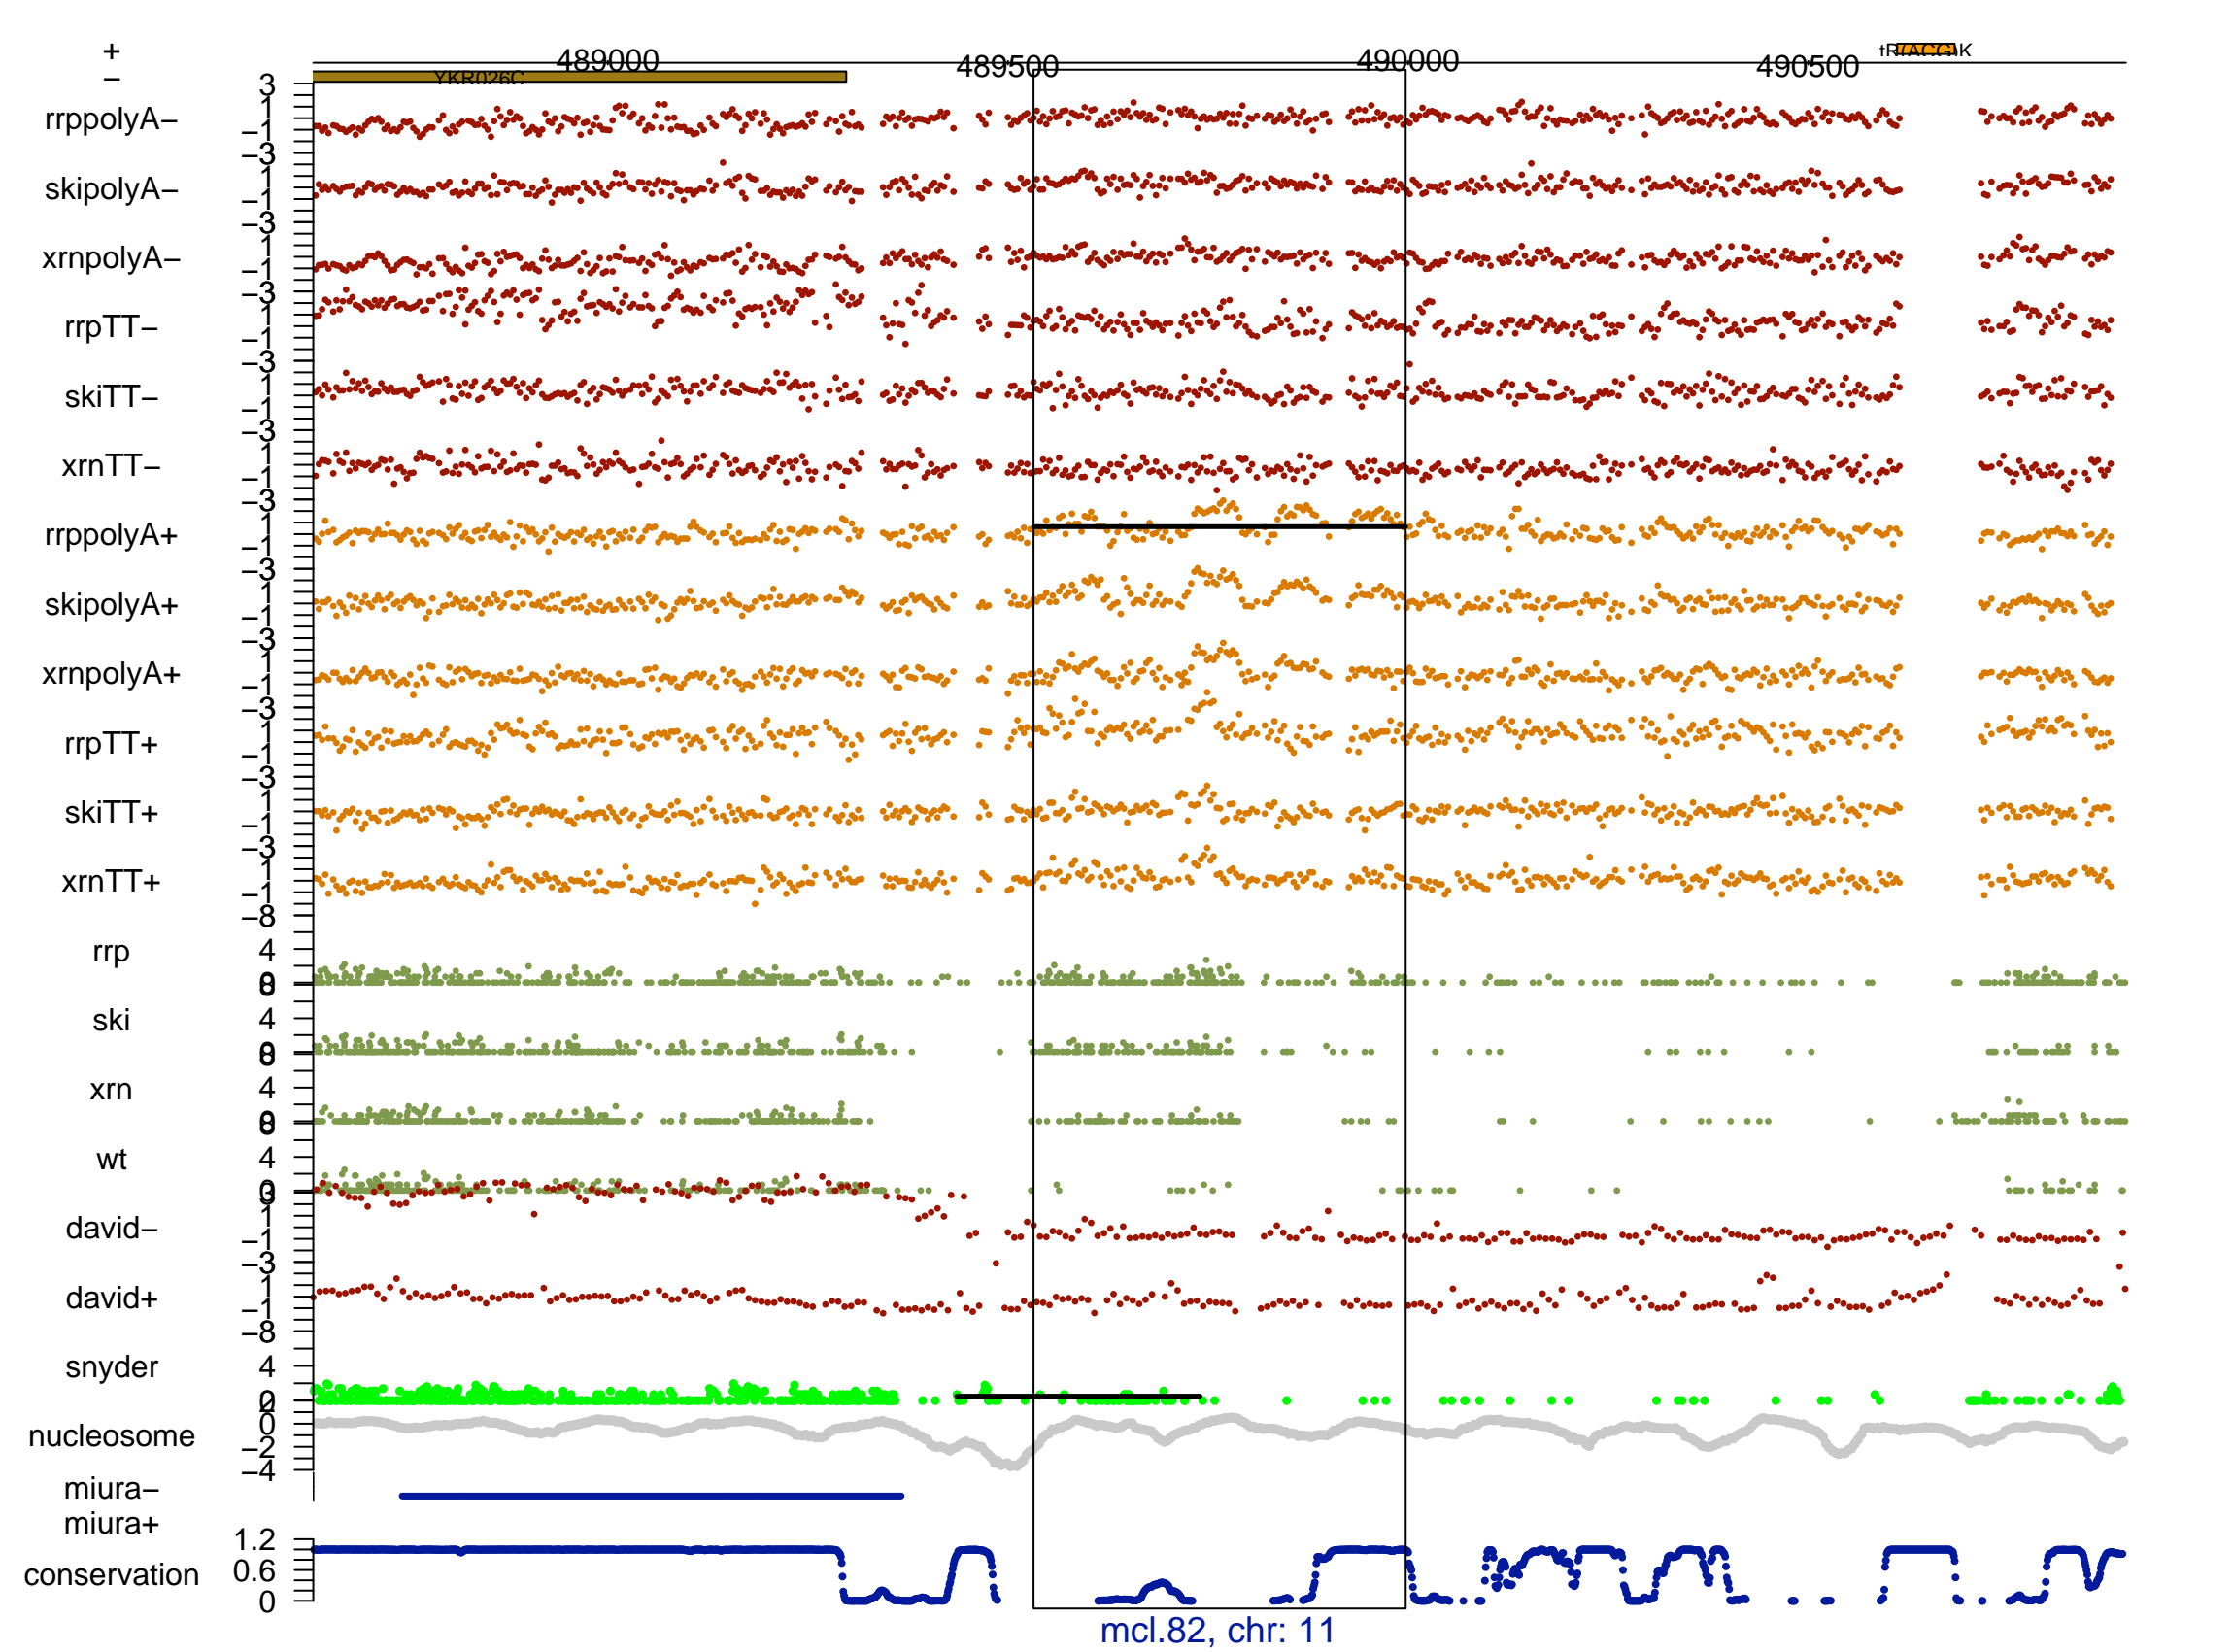

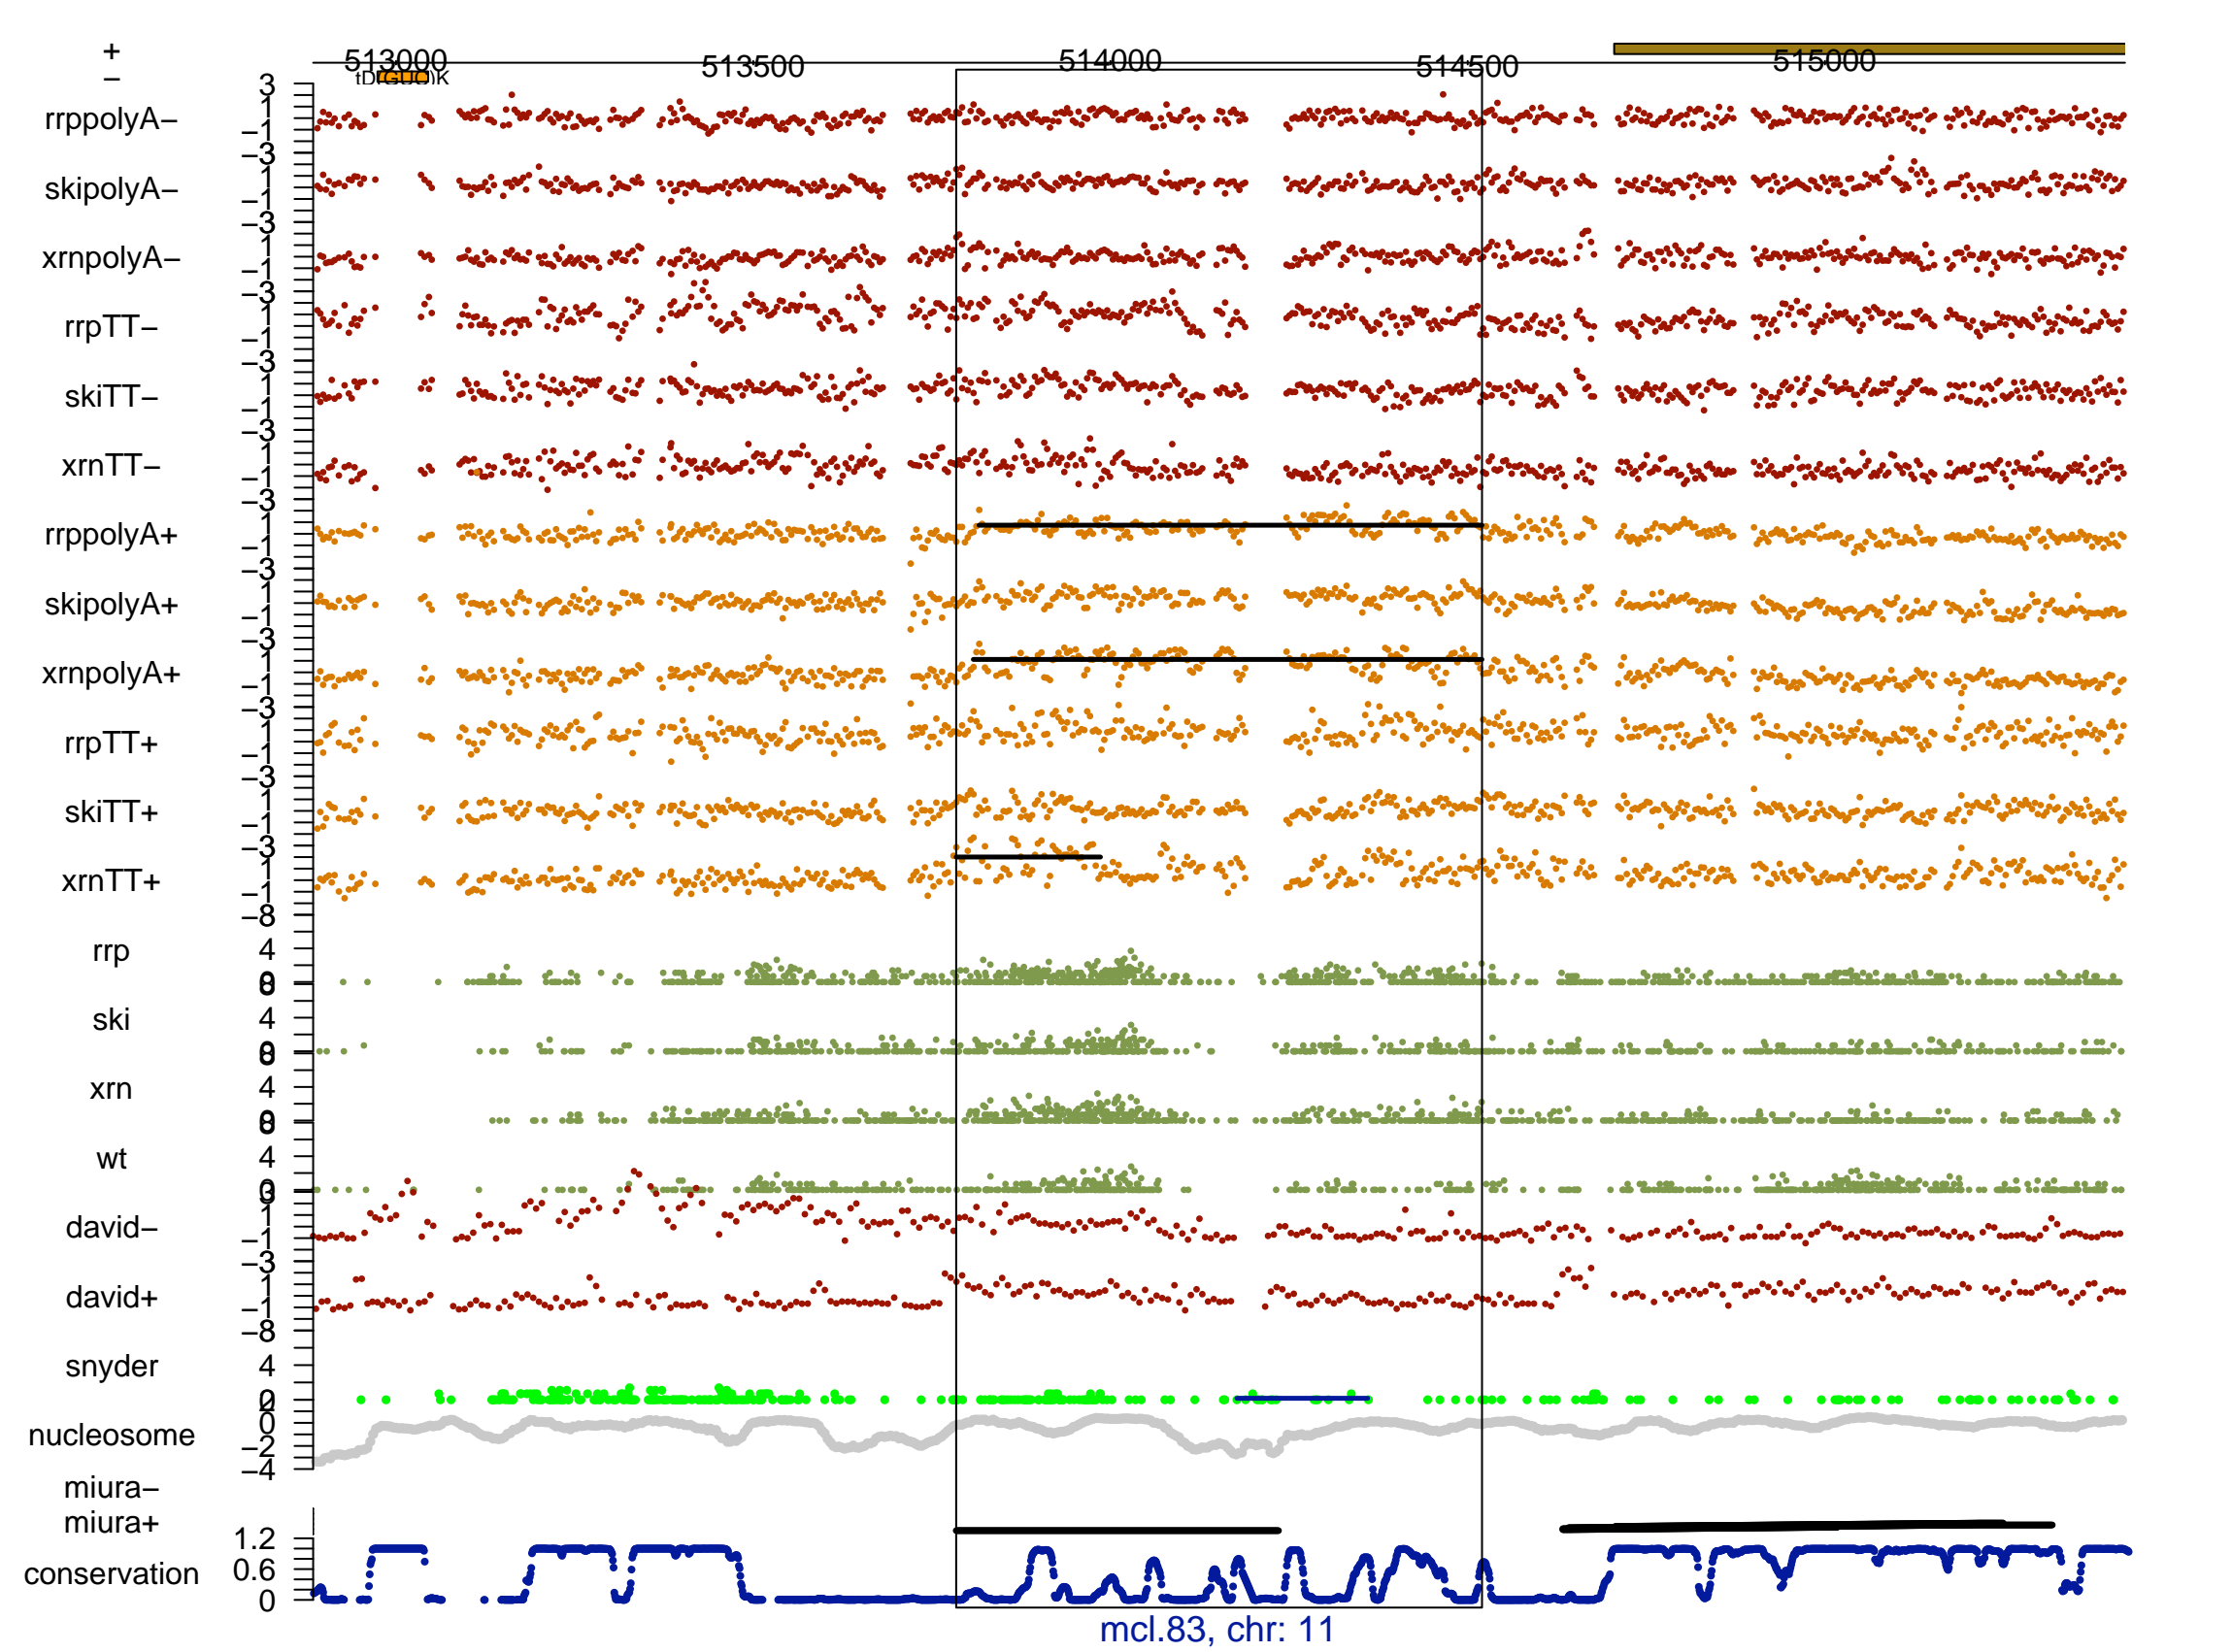

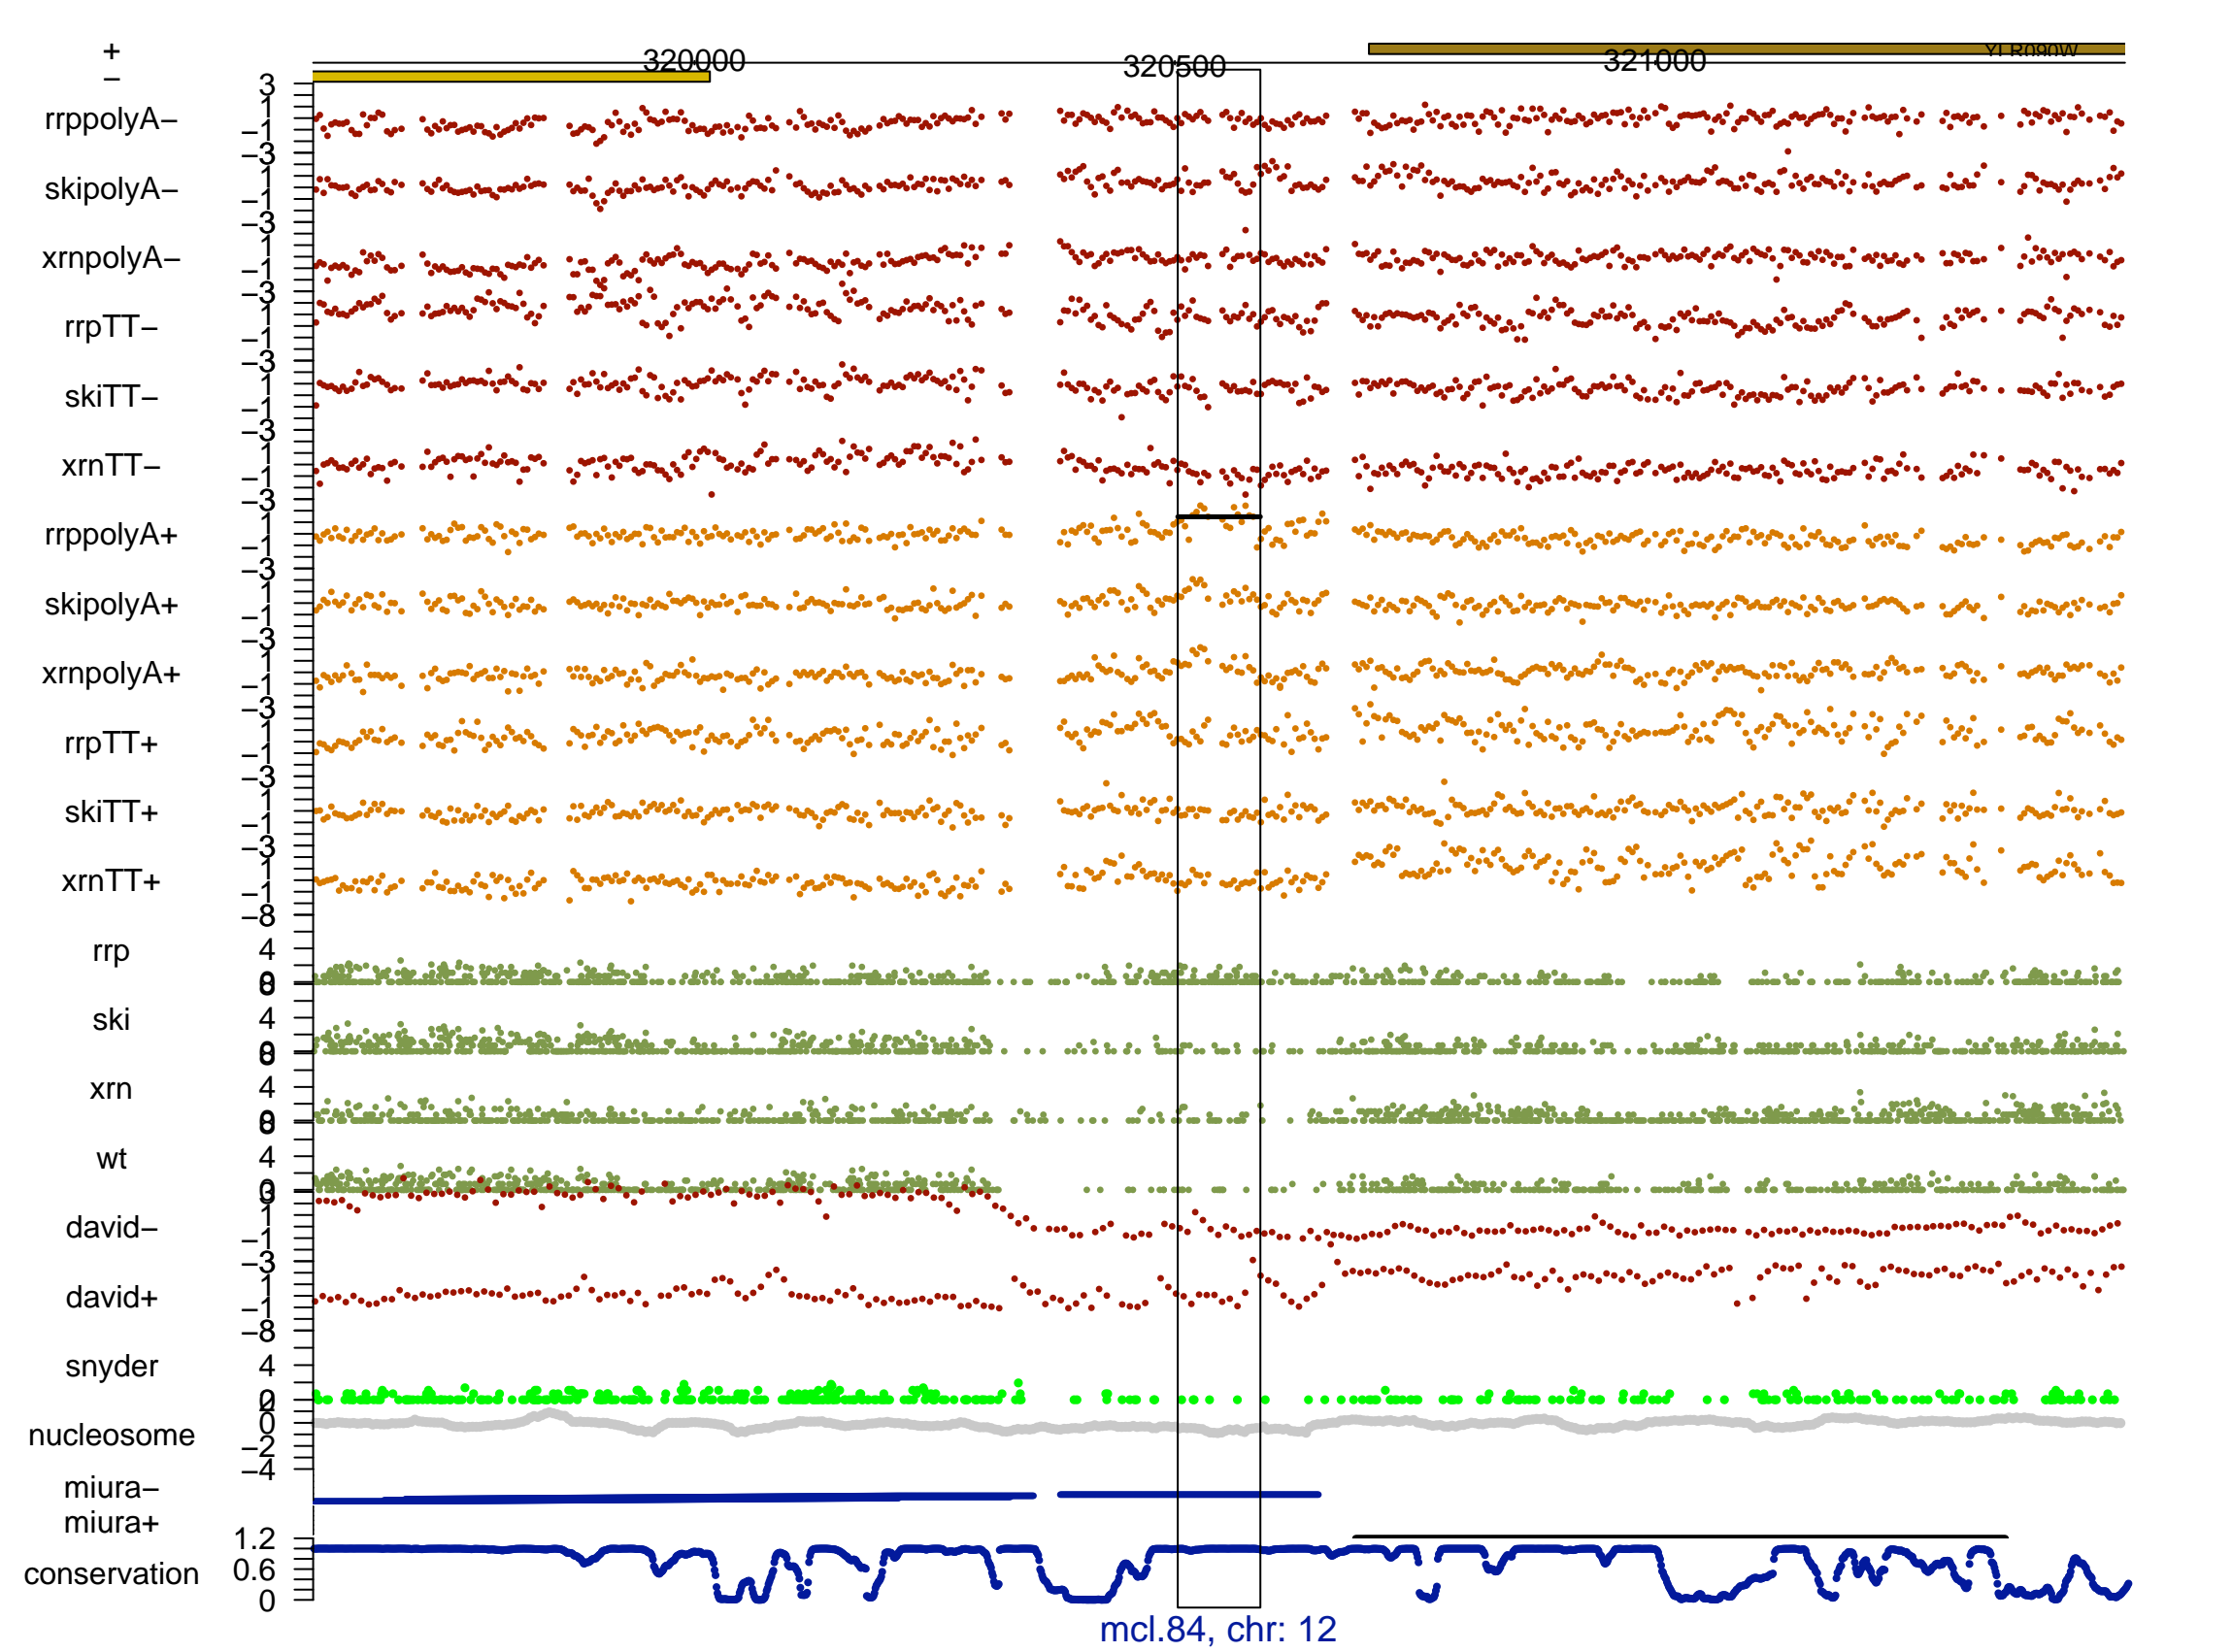

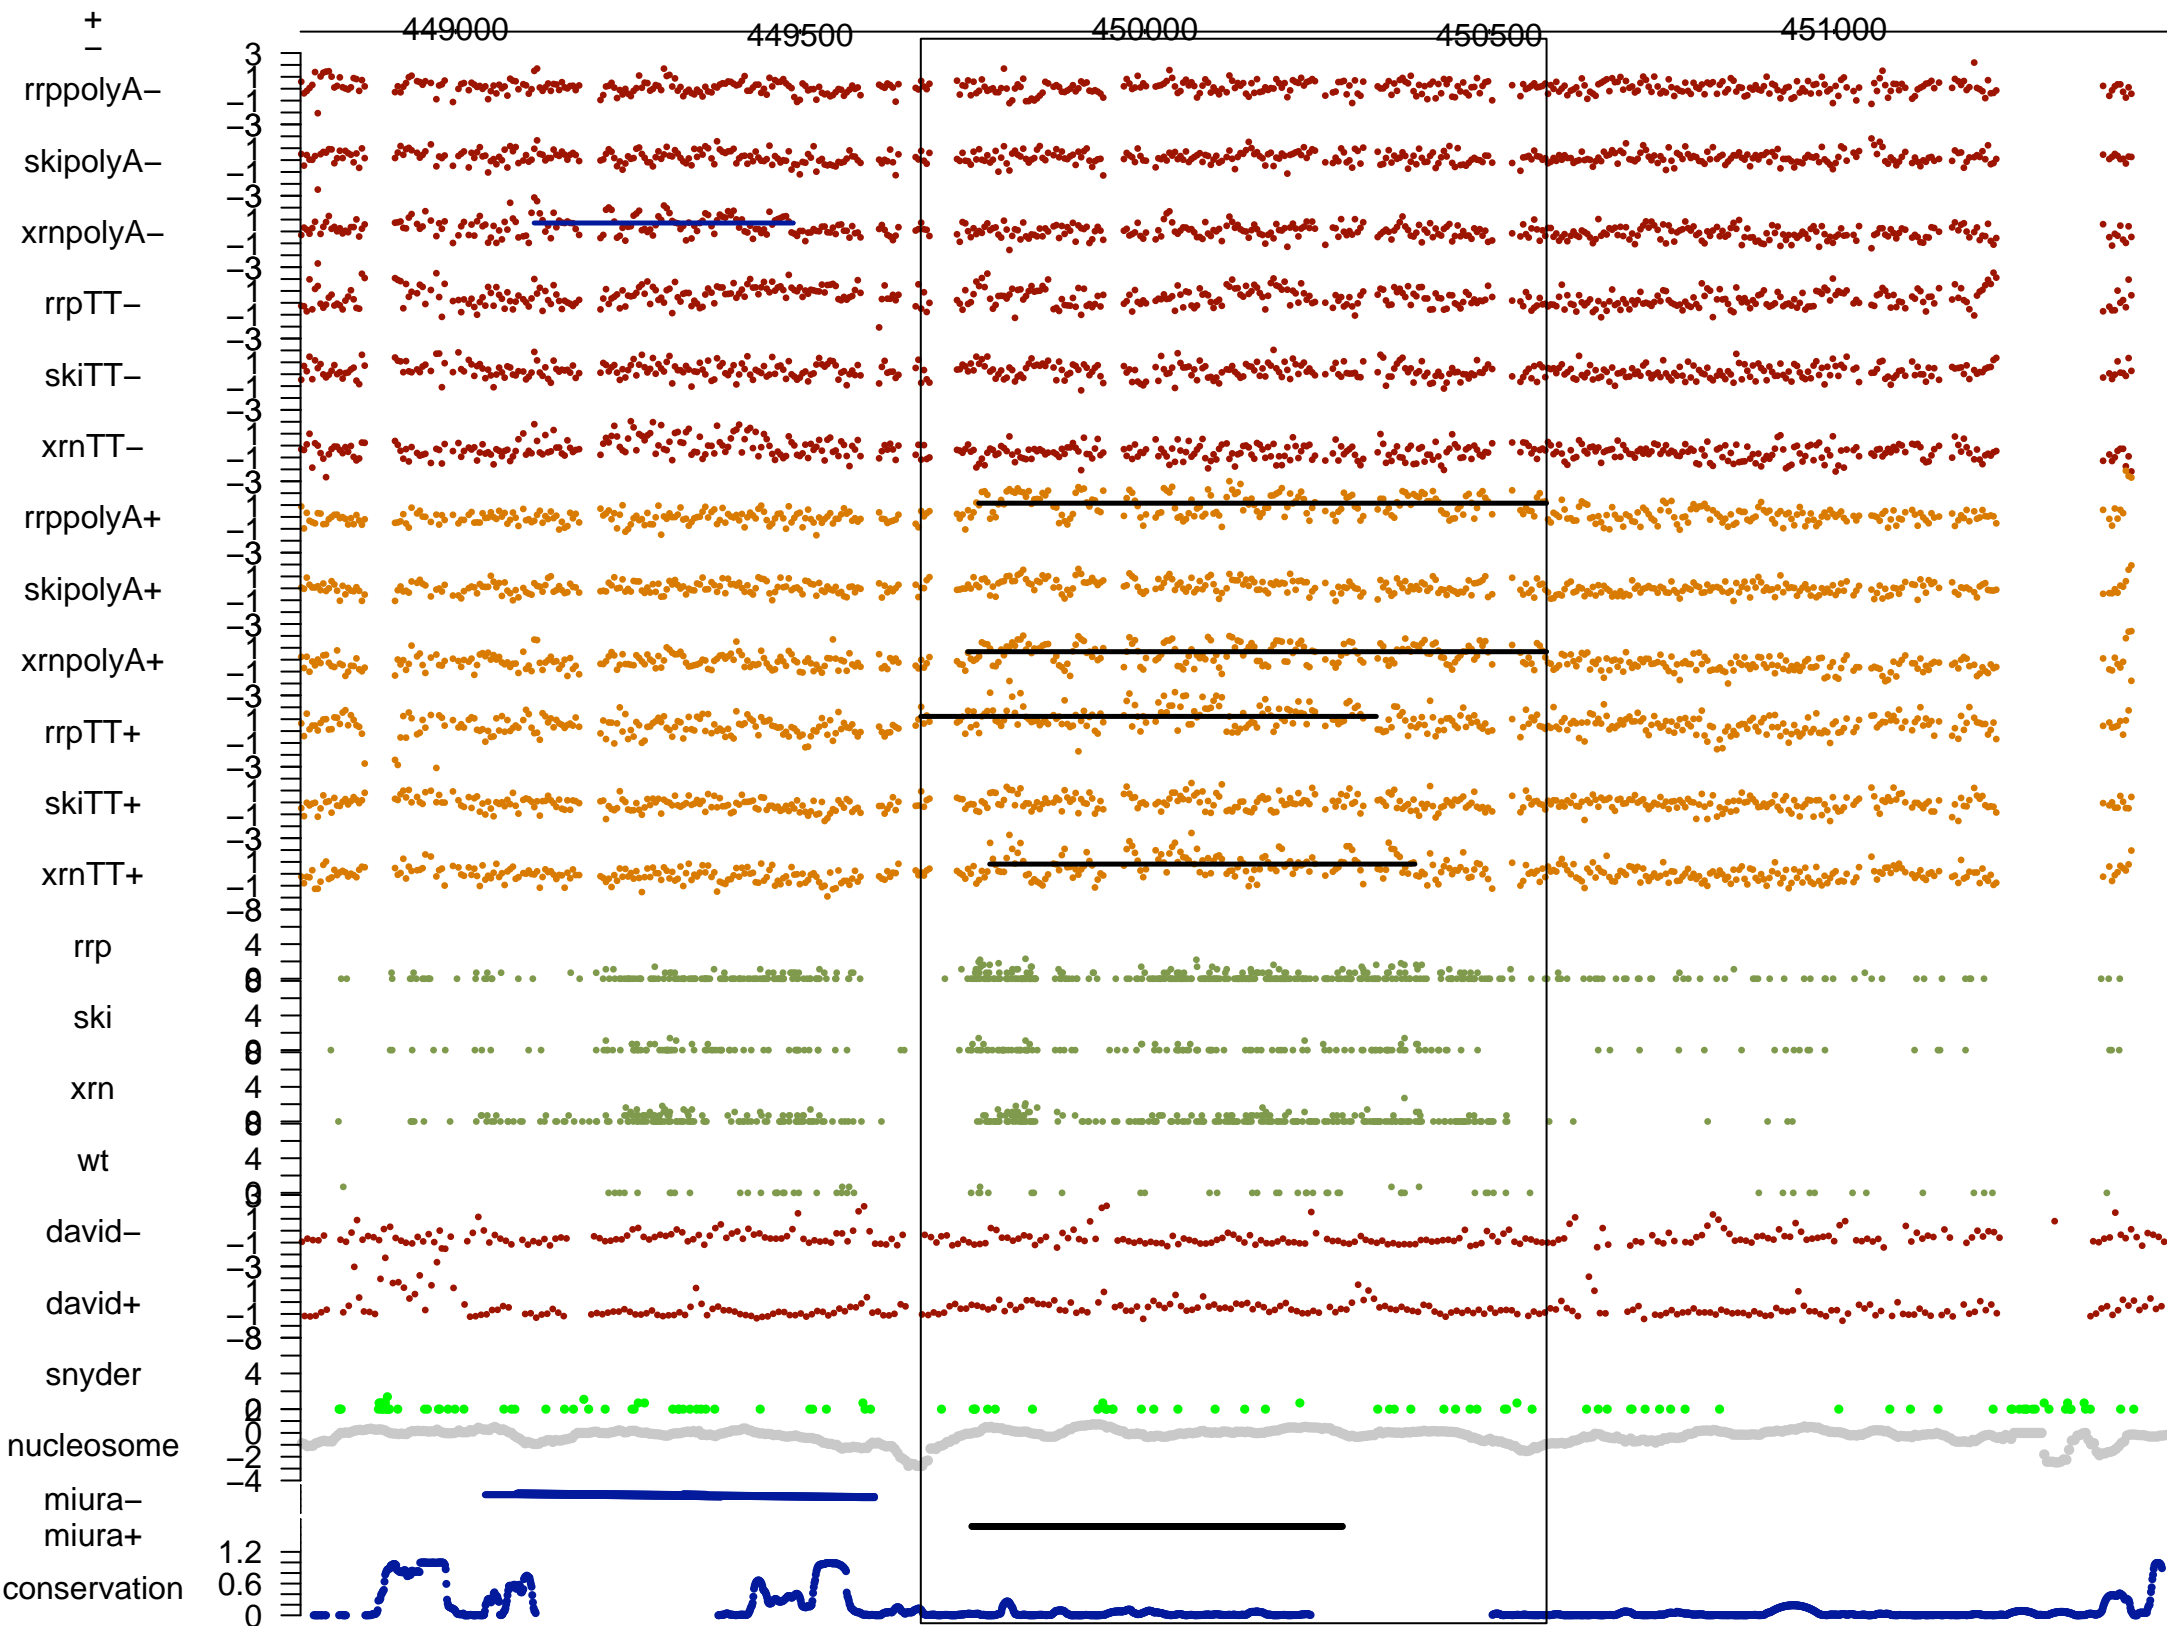

*mcl.85*, chr: 12



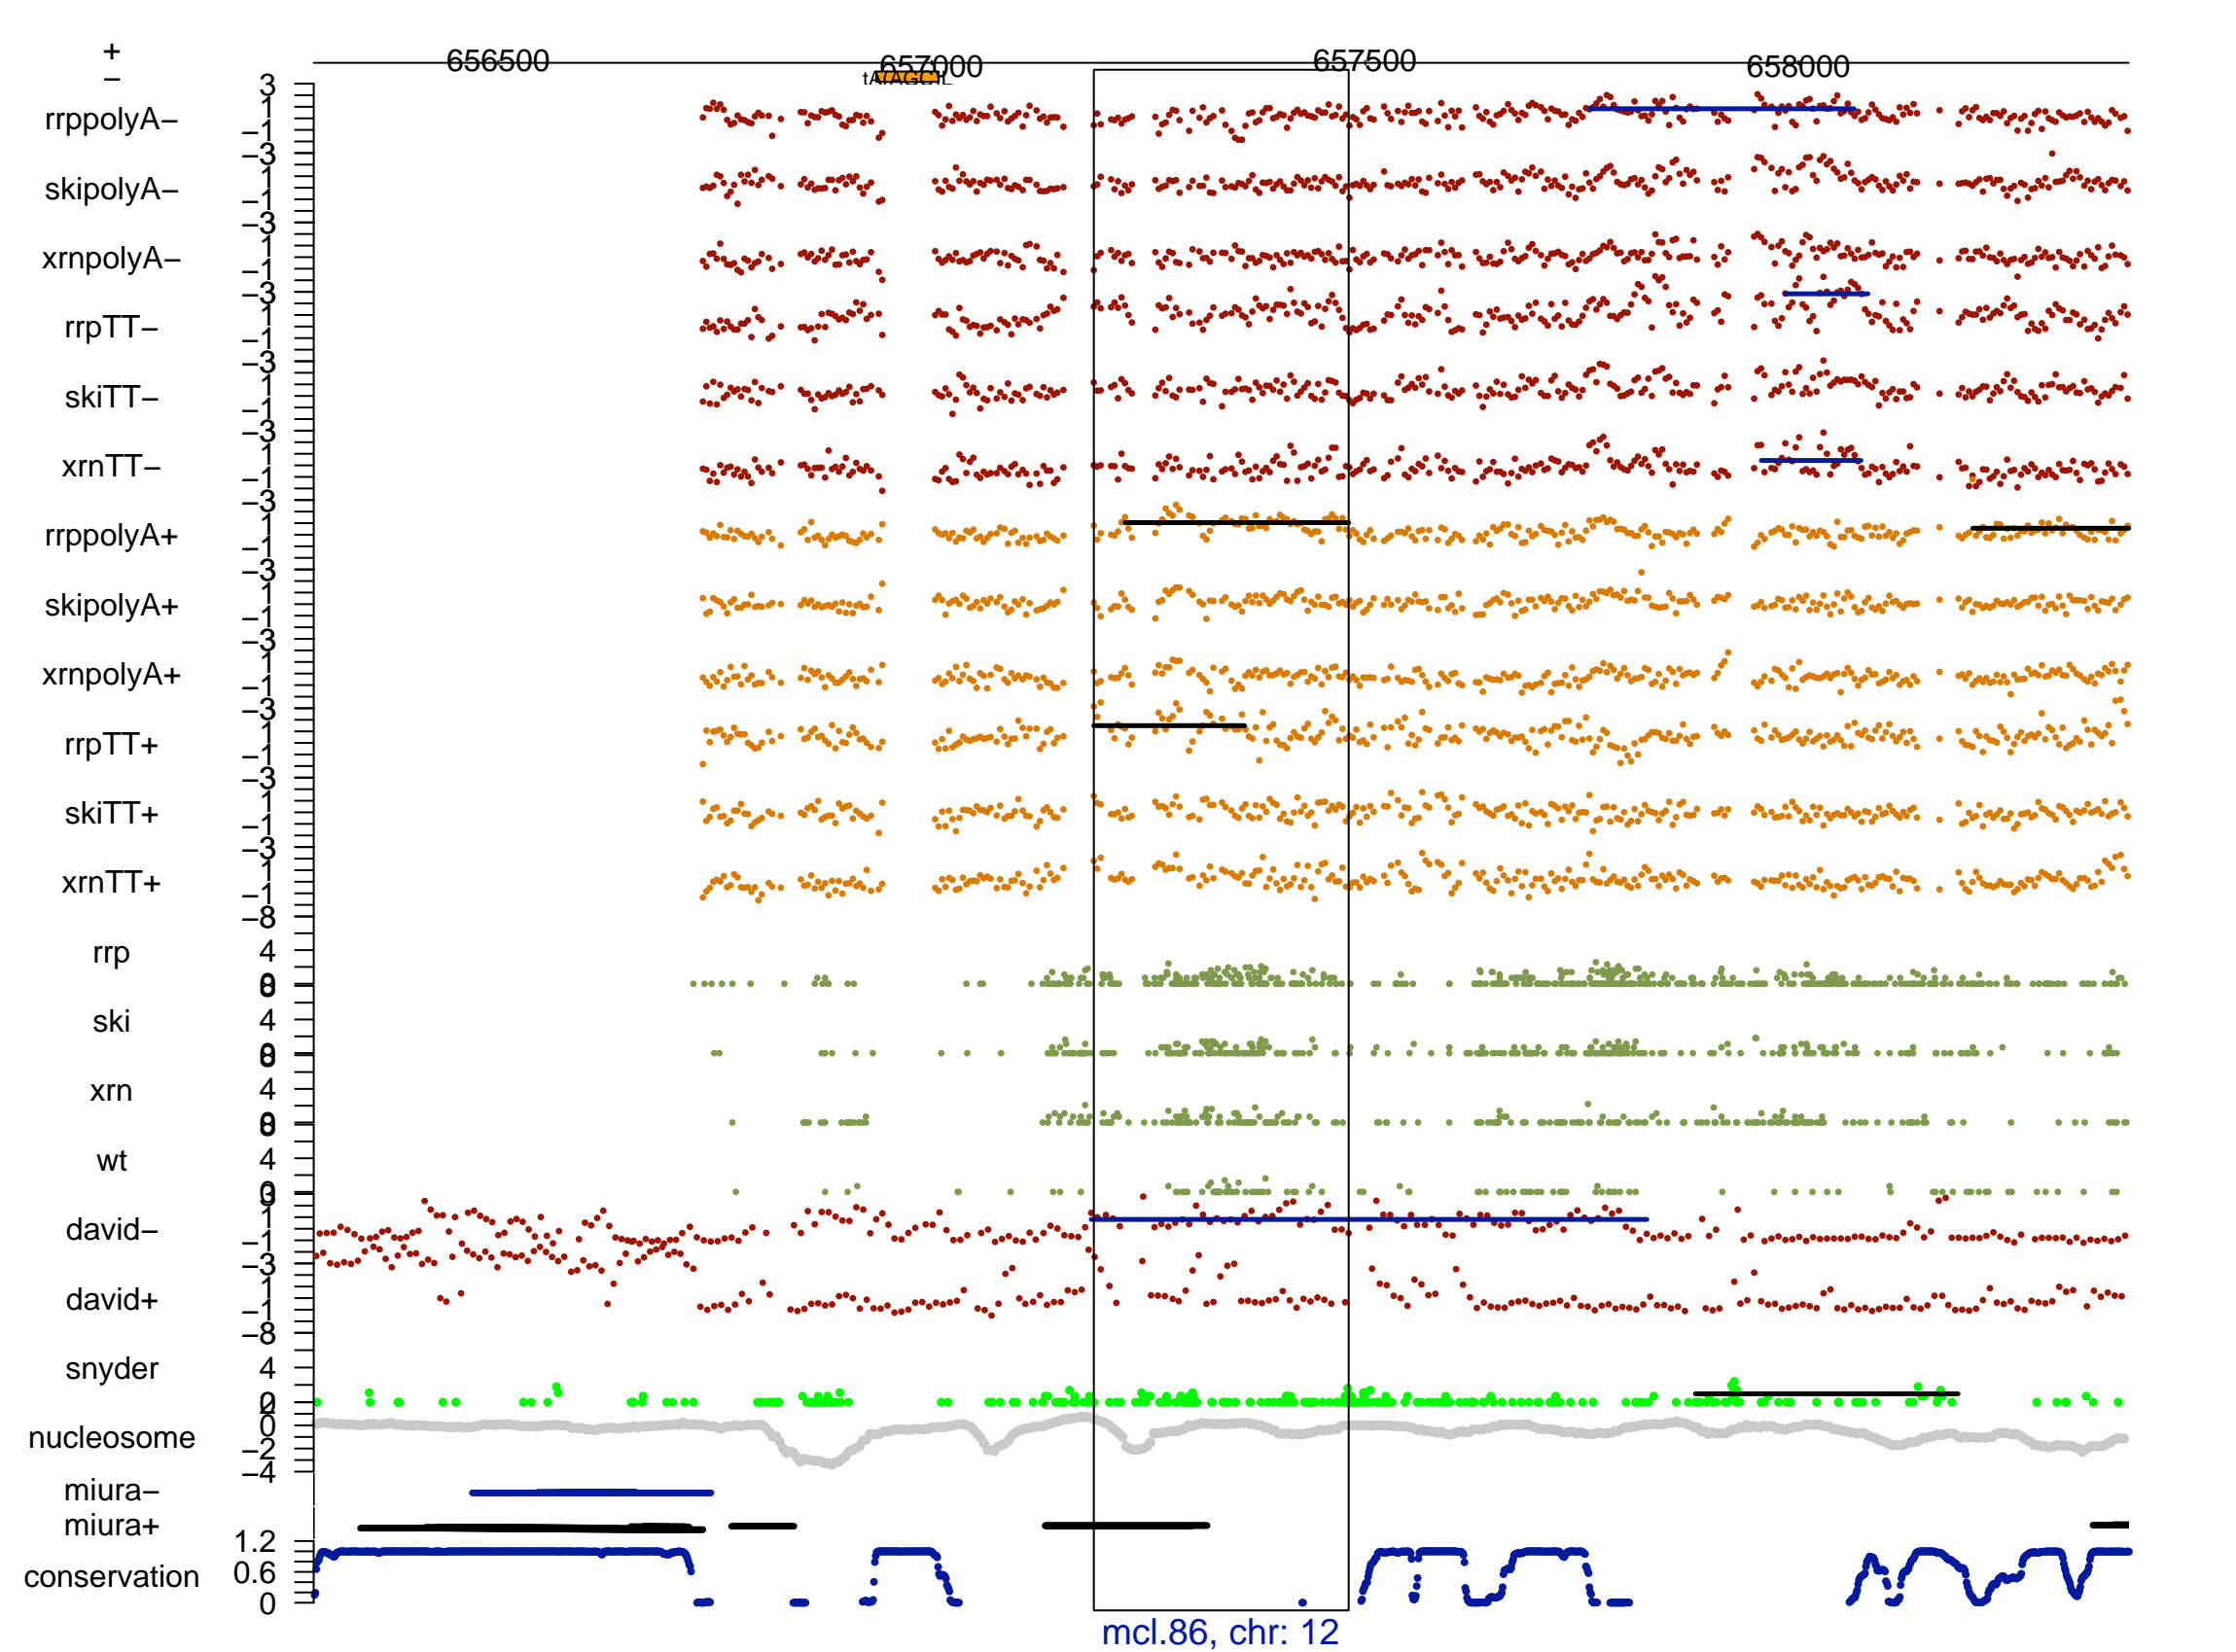

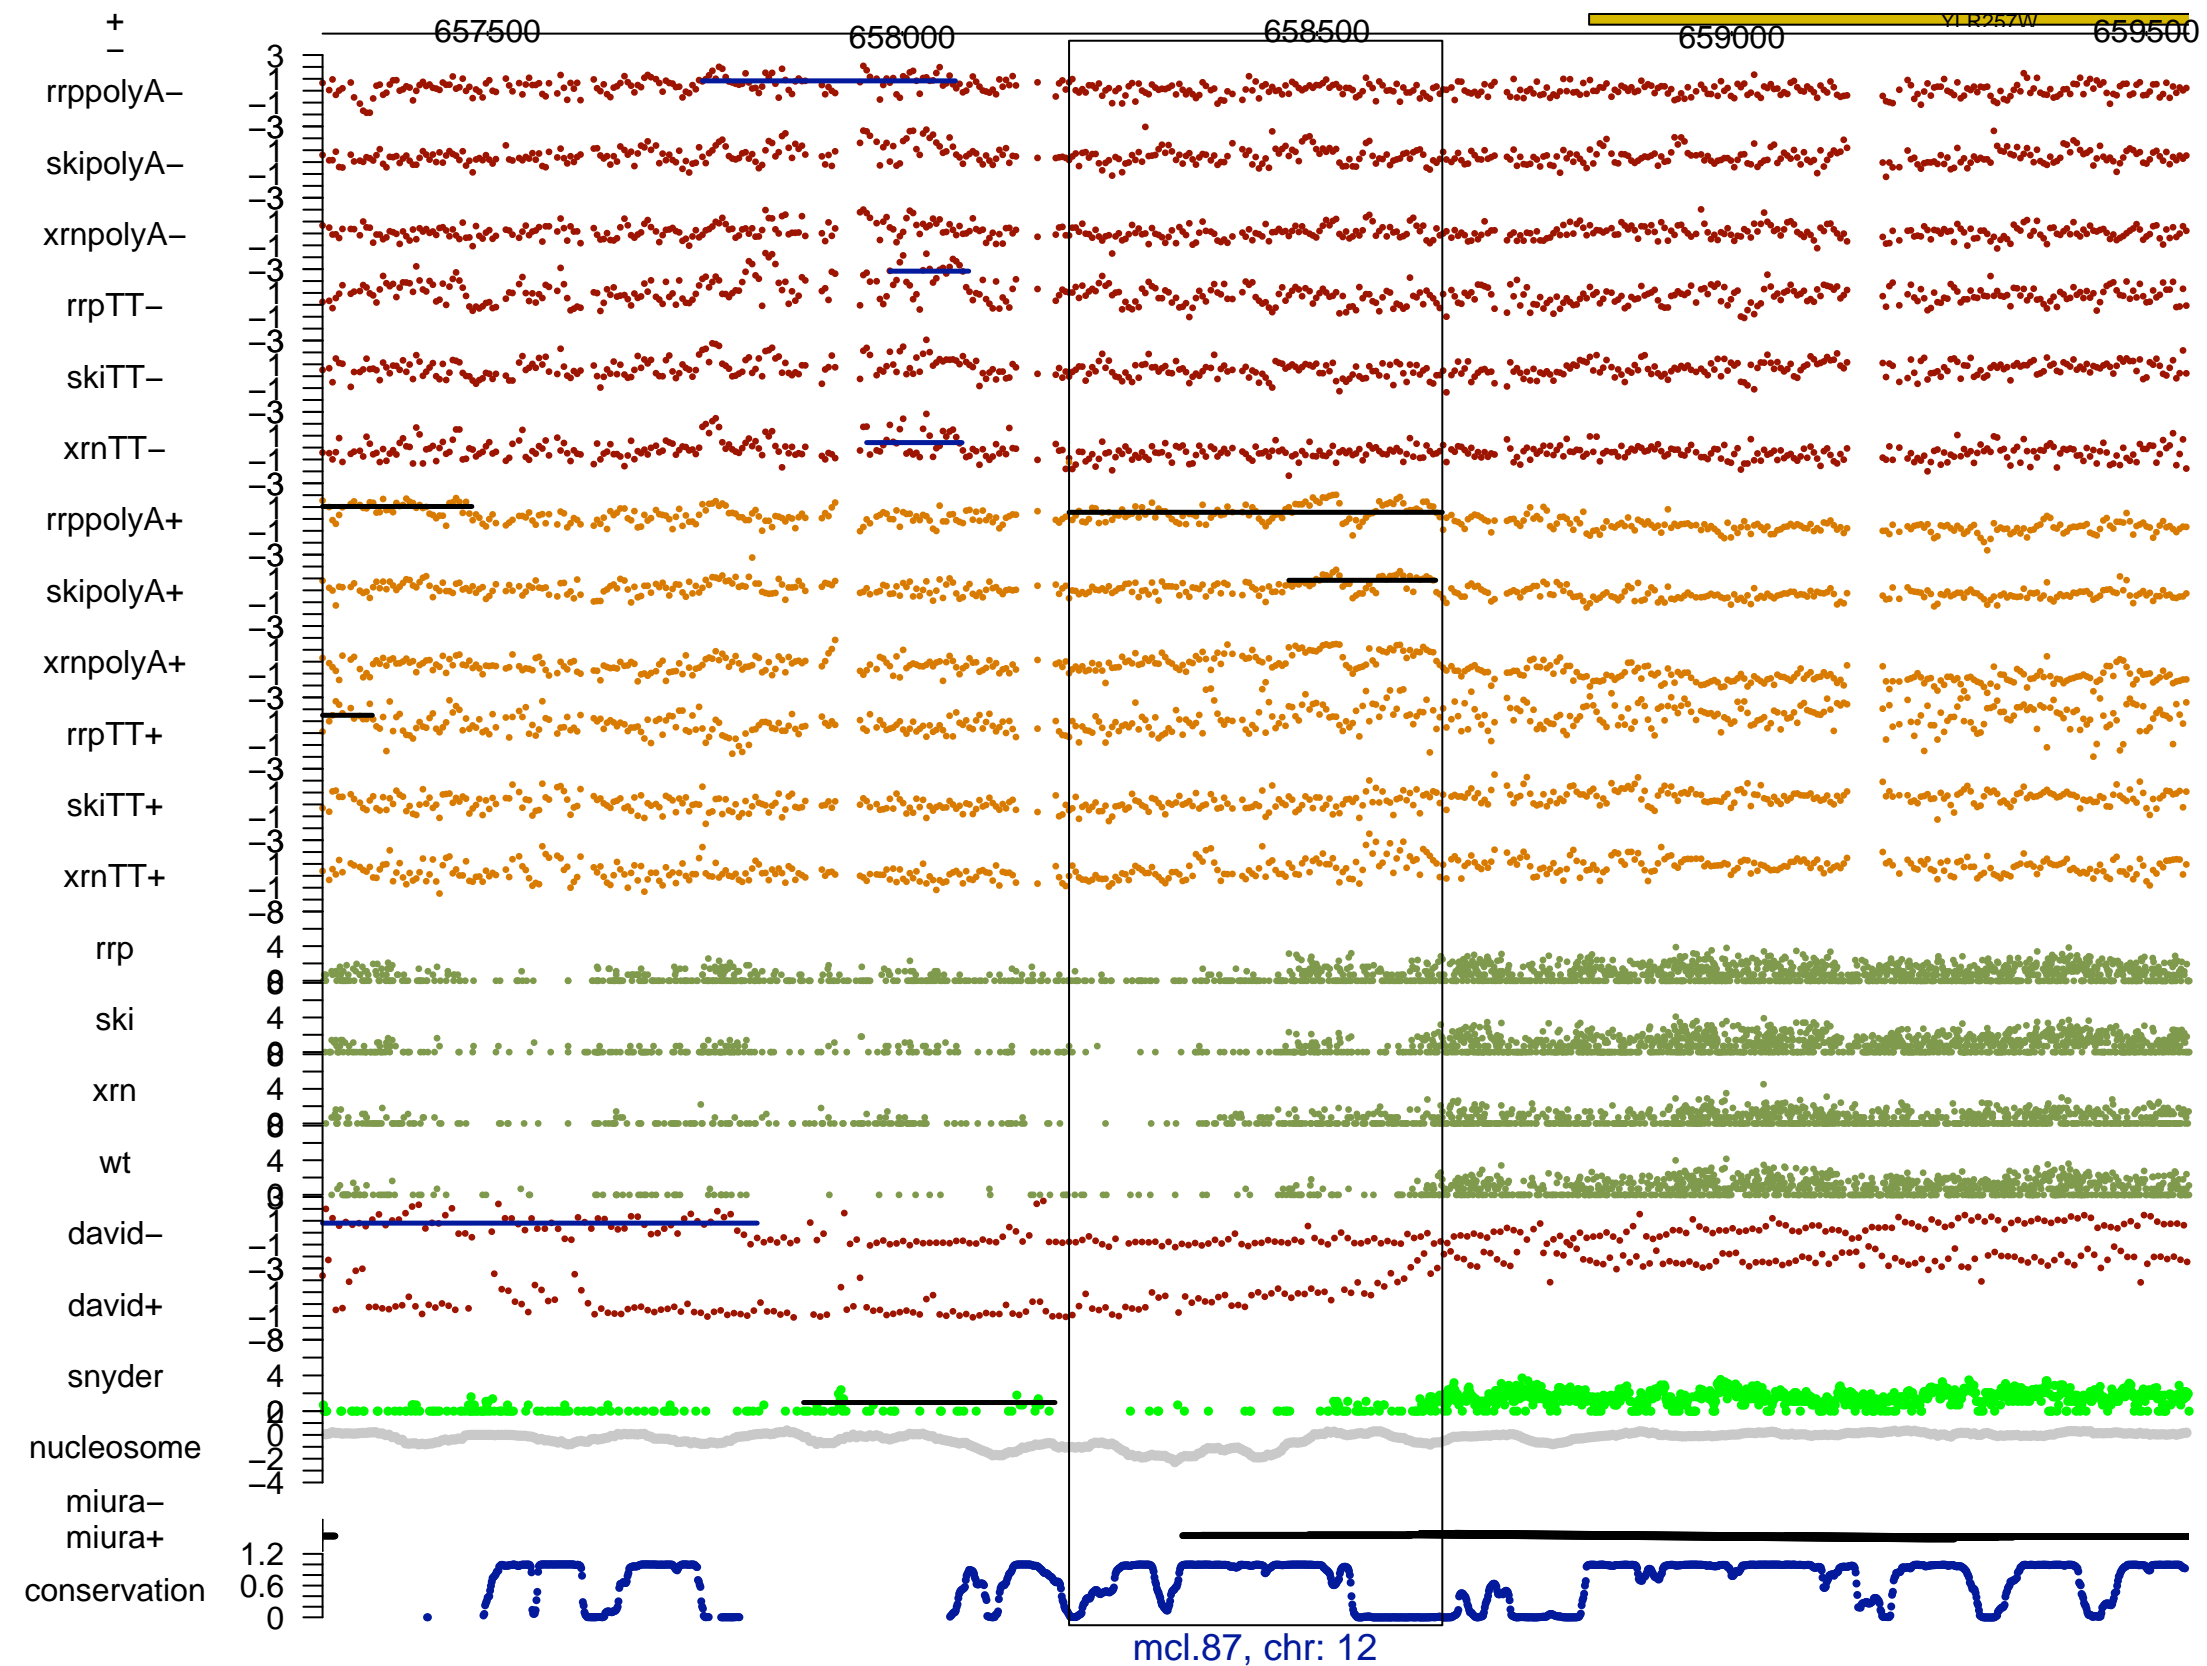

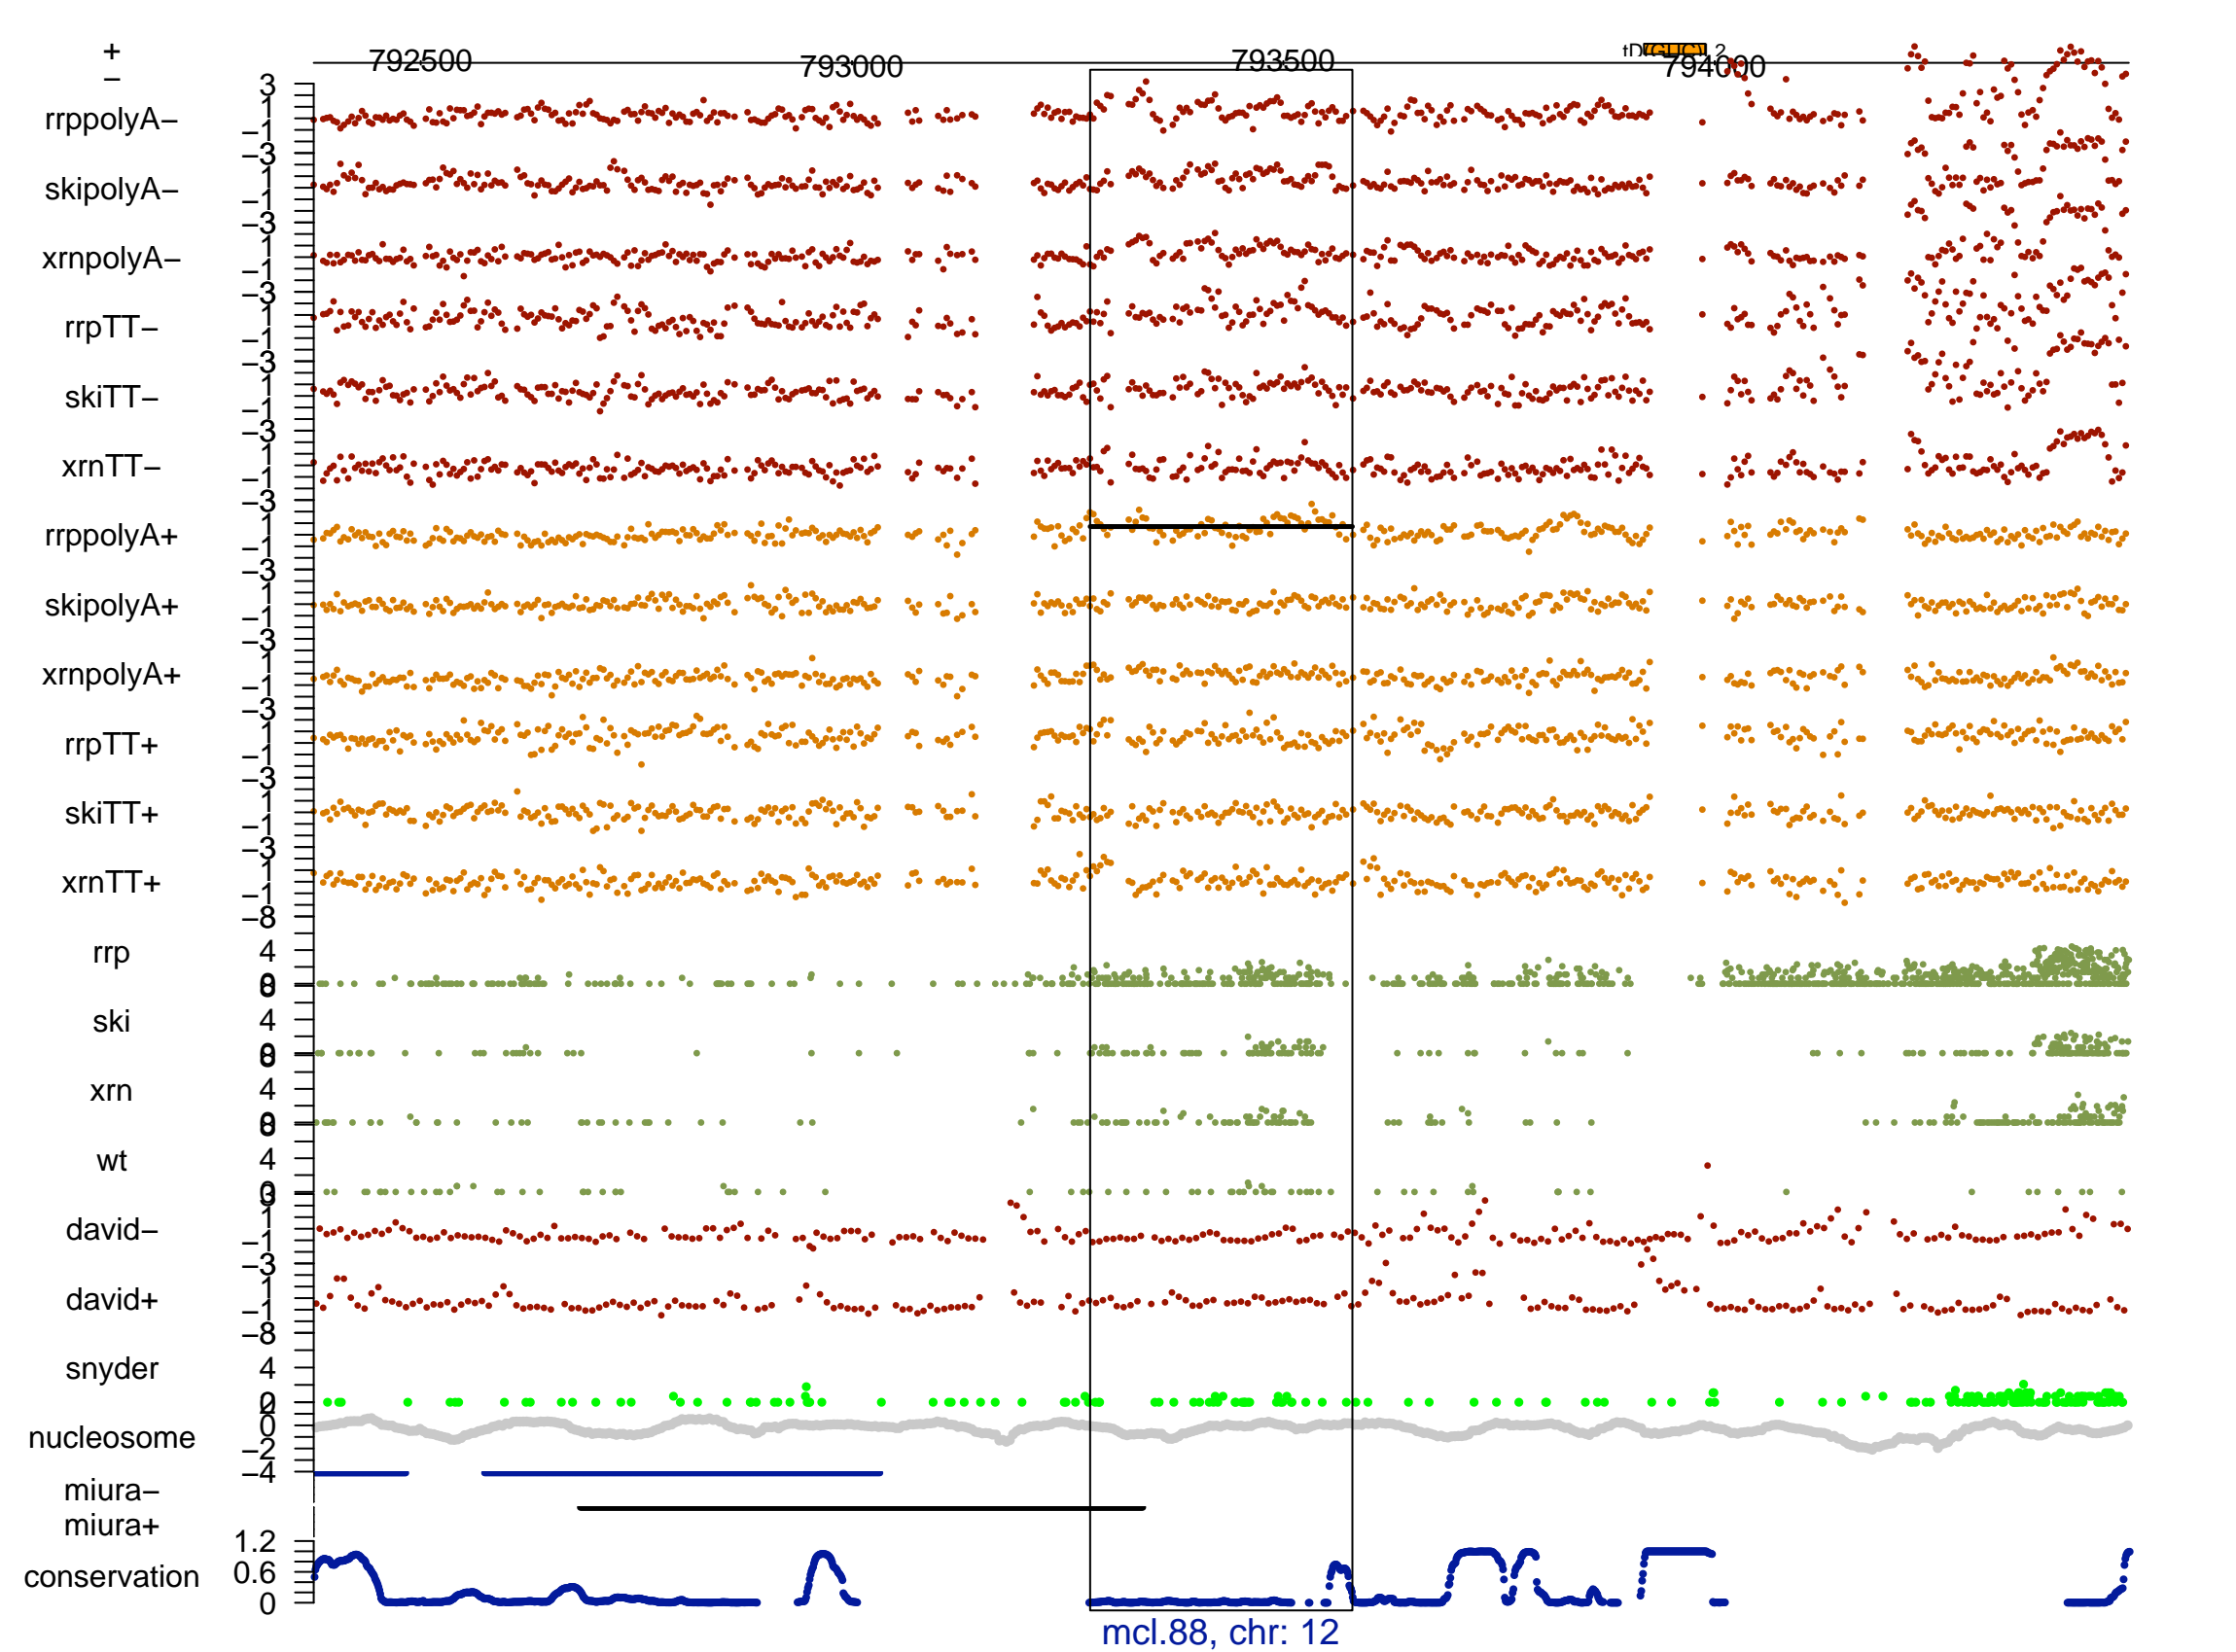















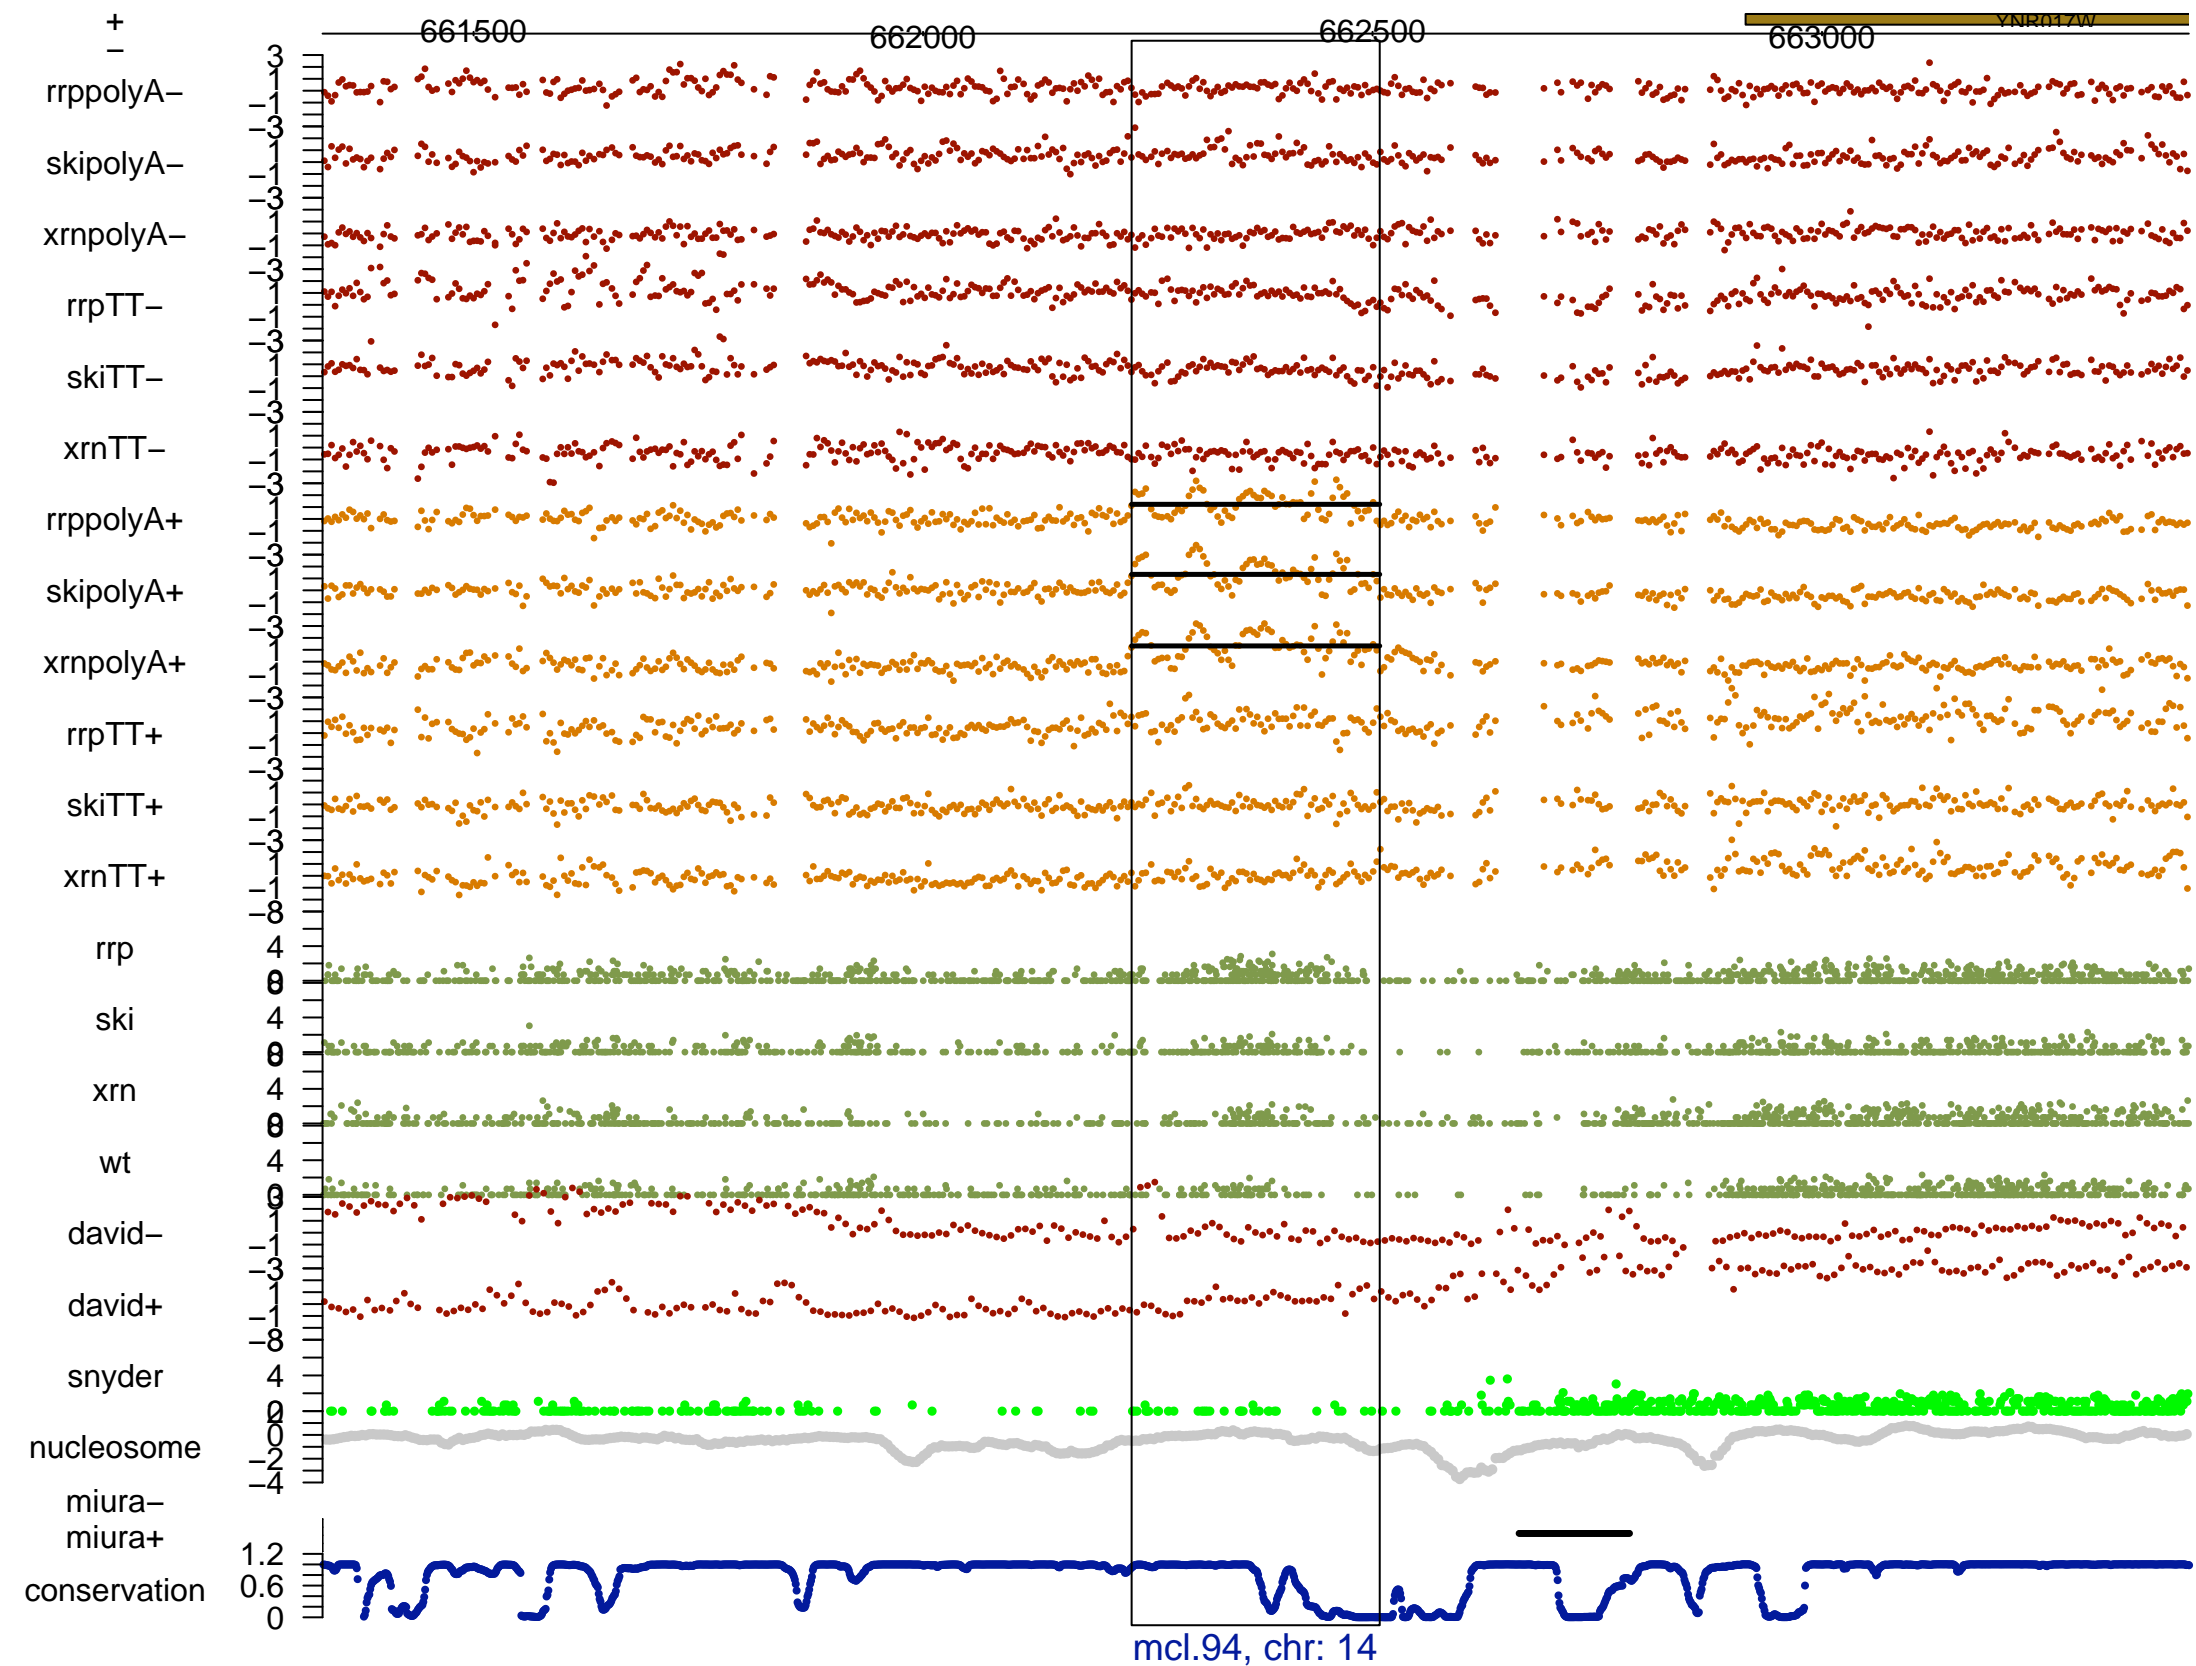

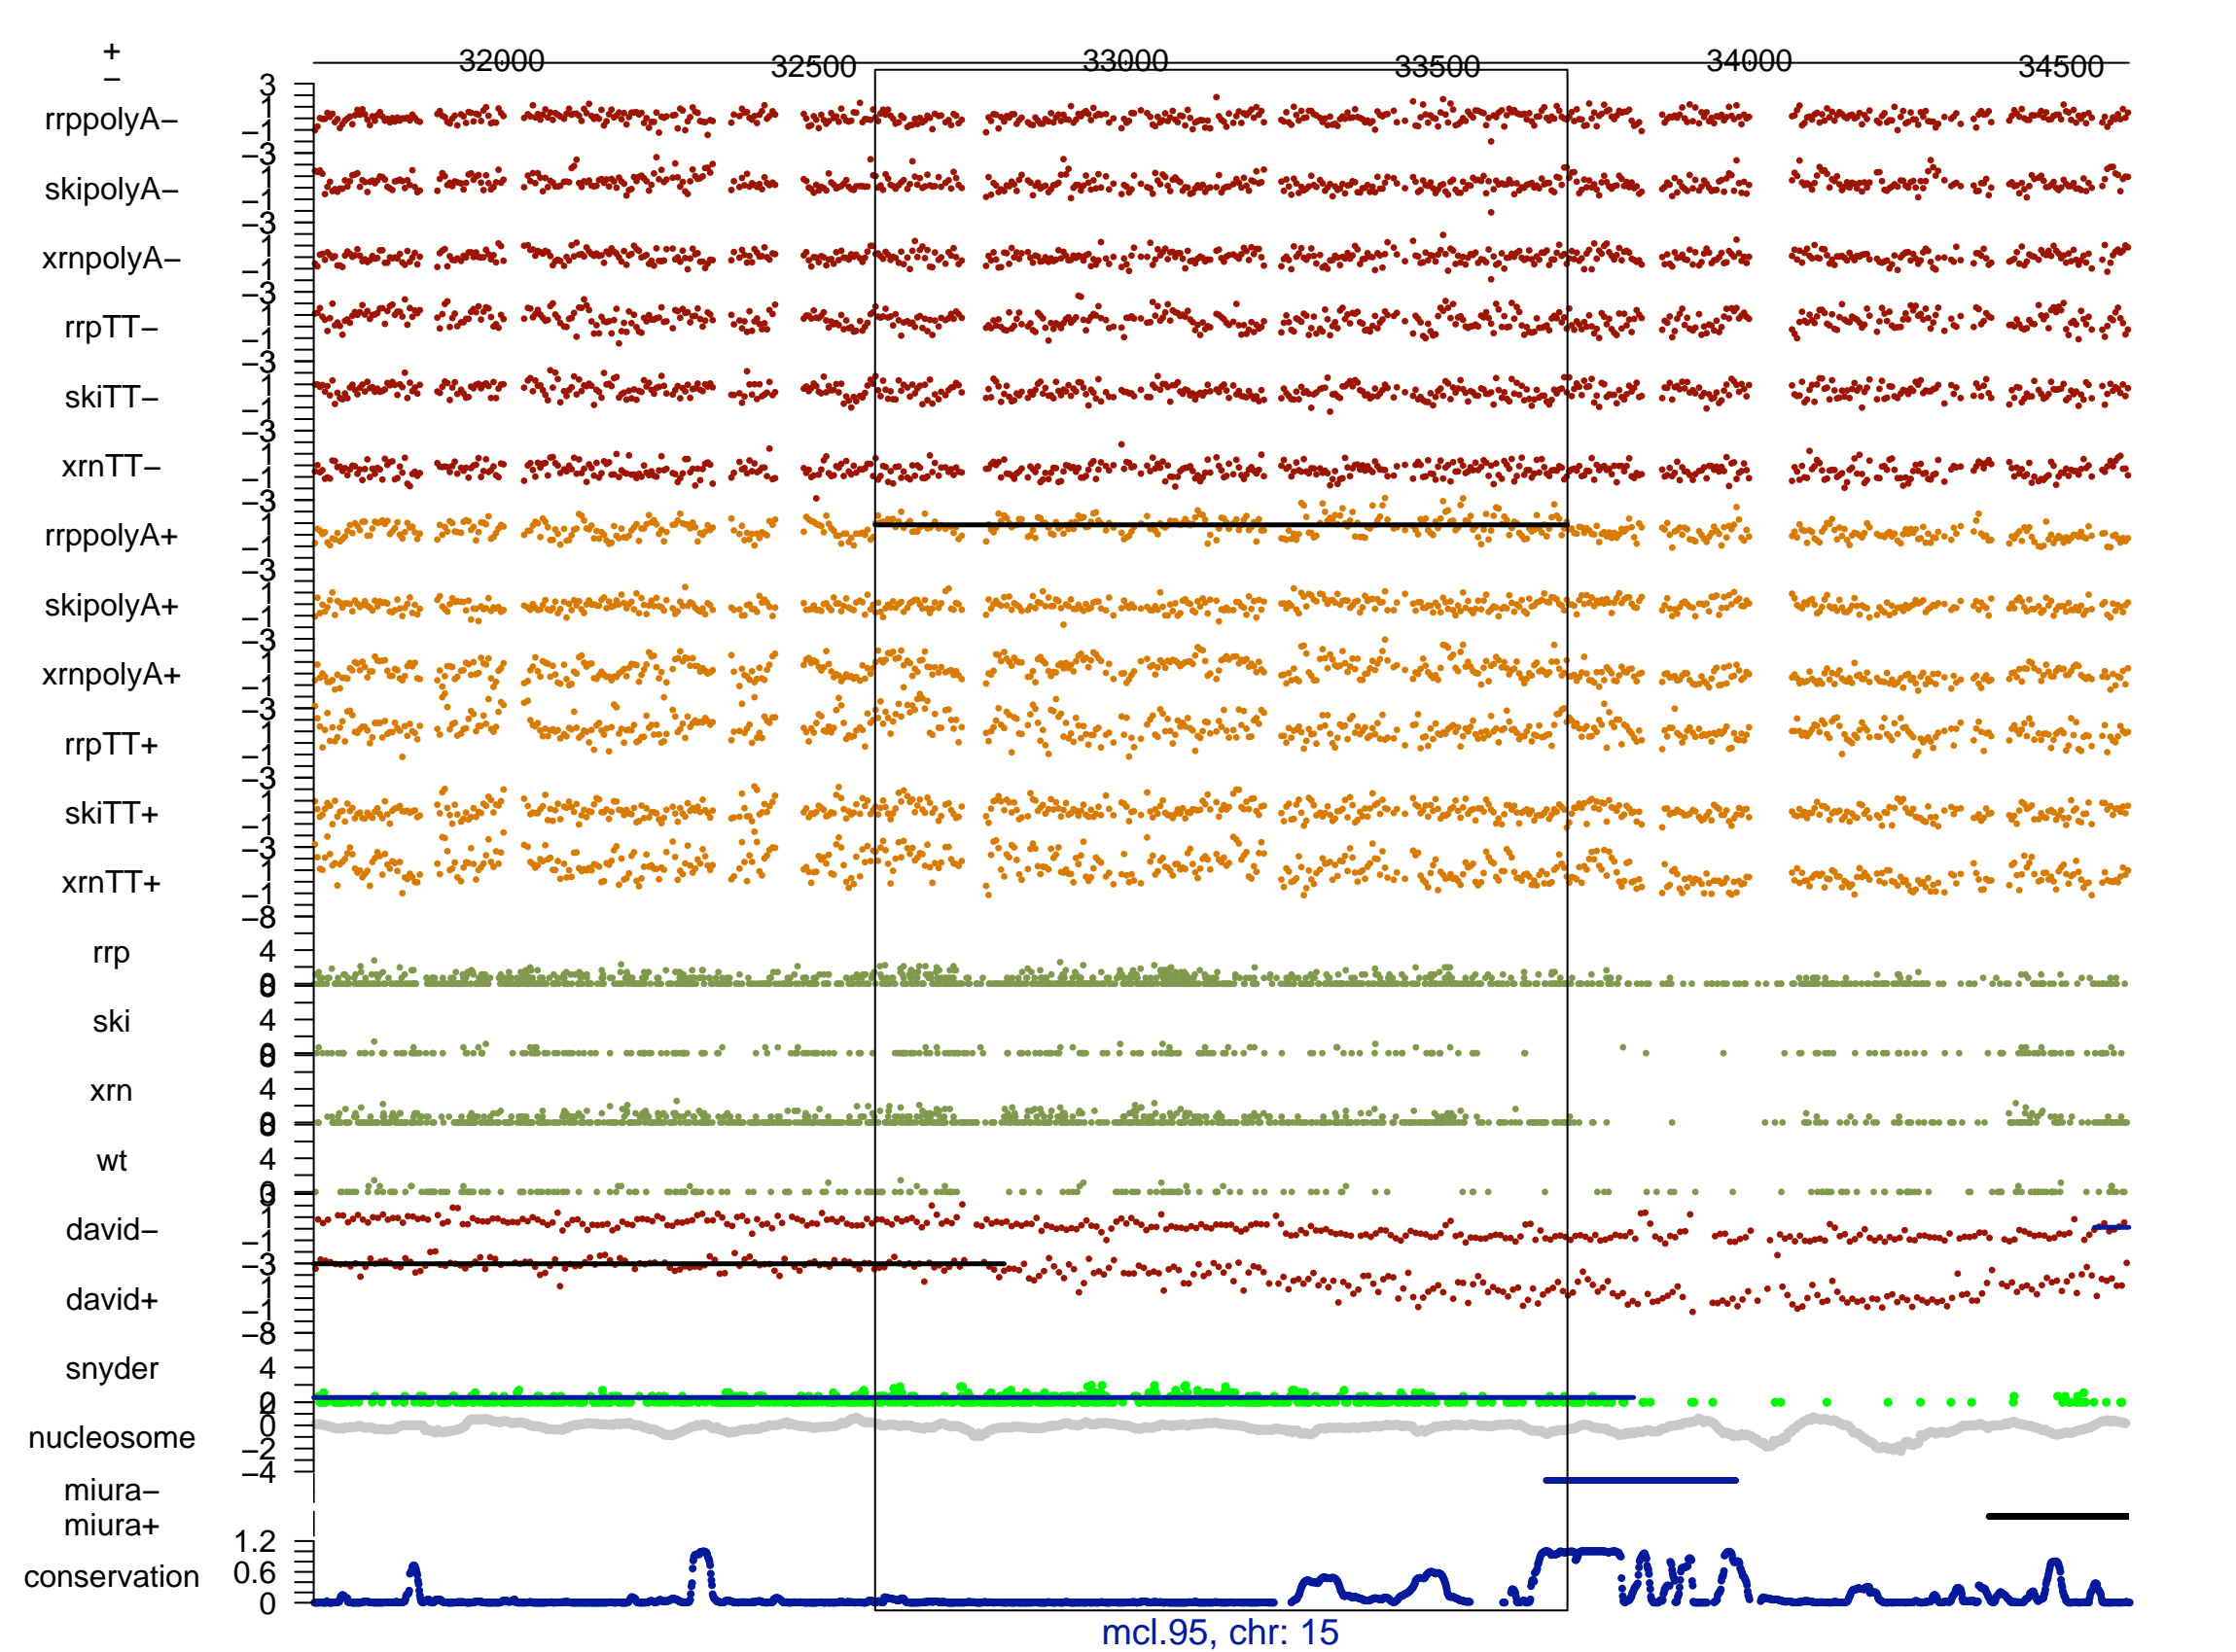

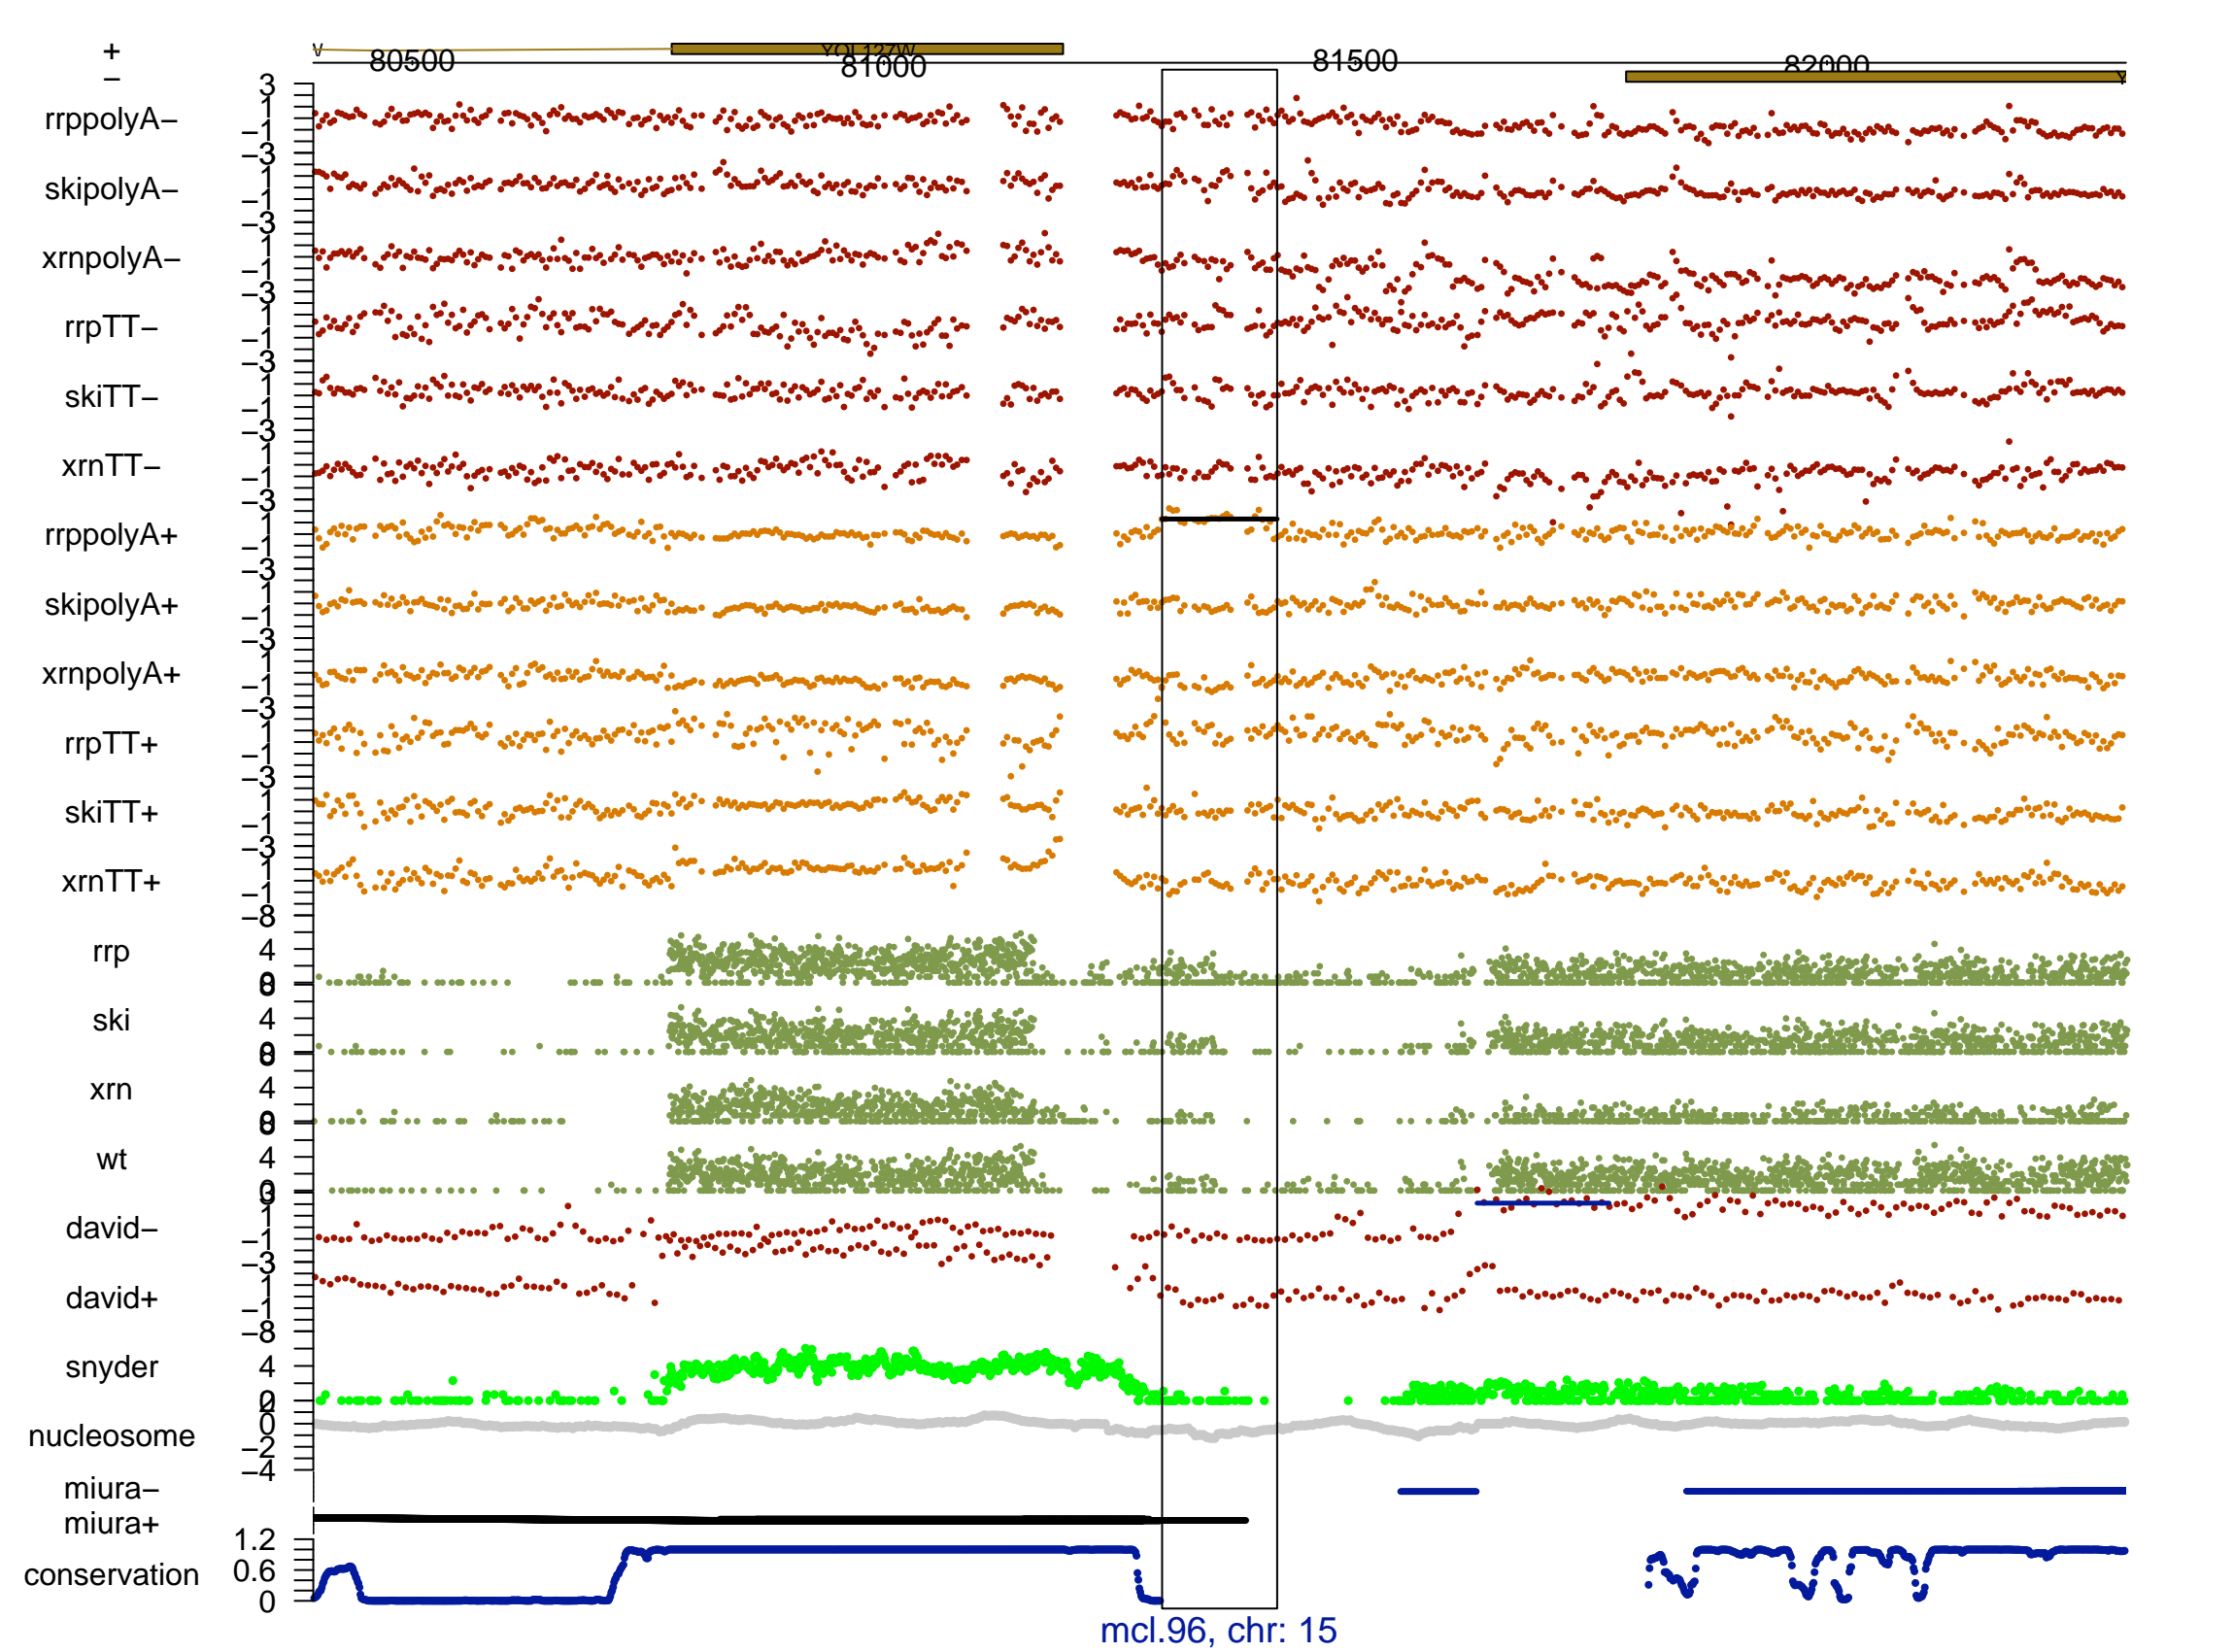

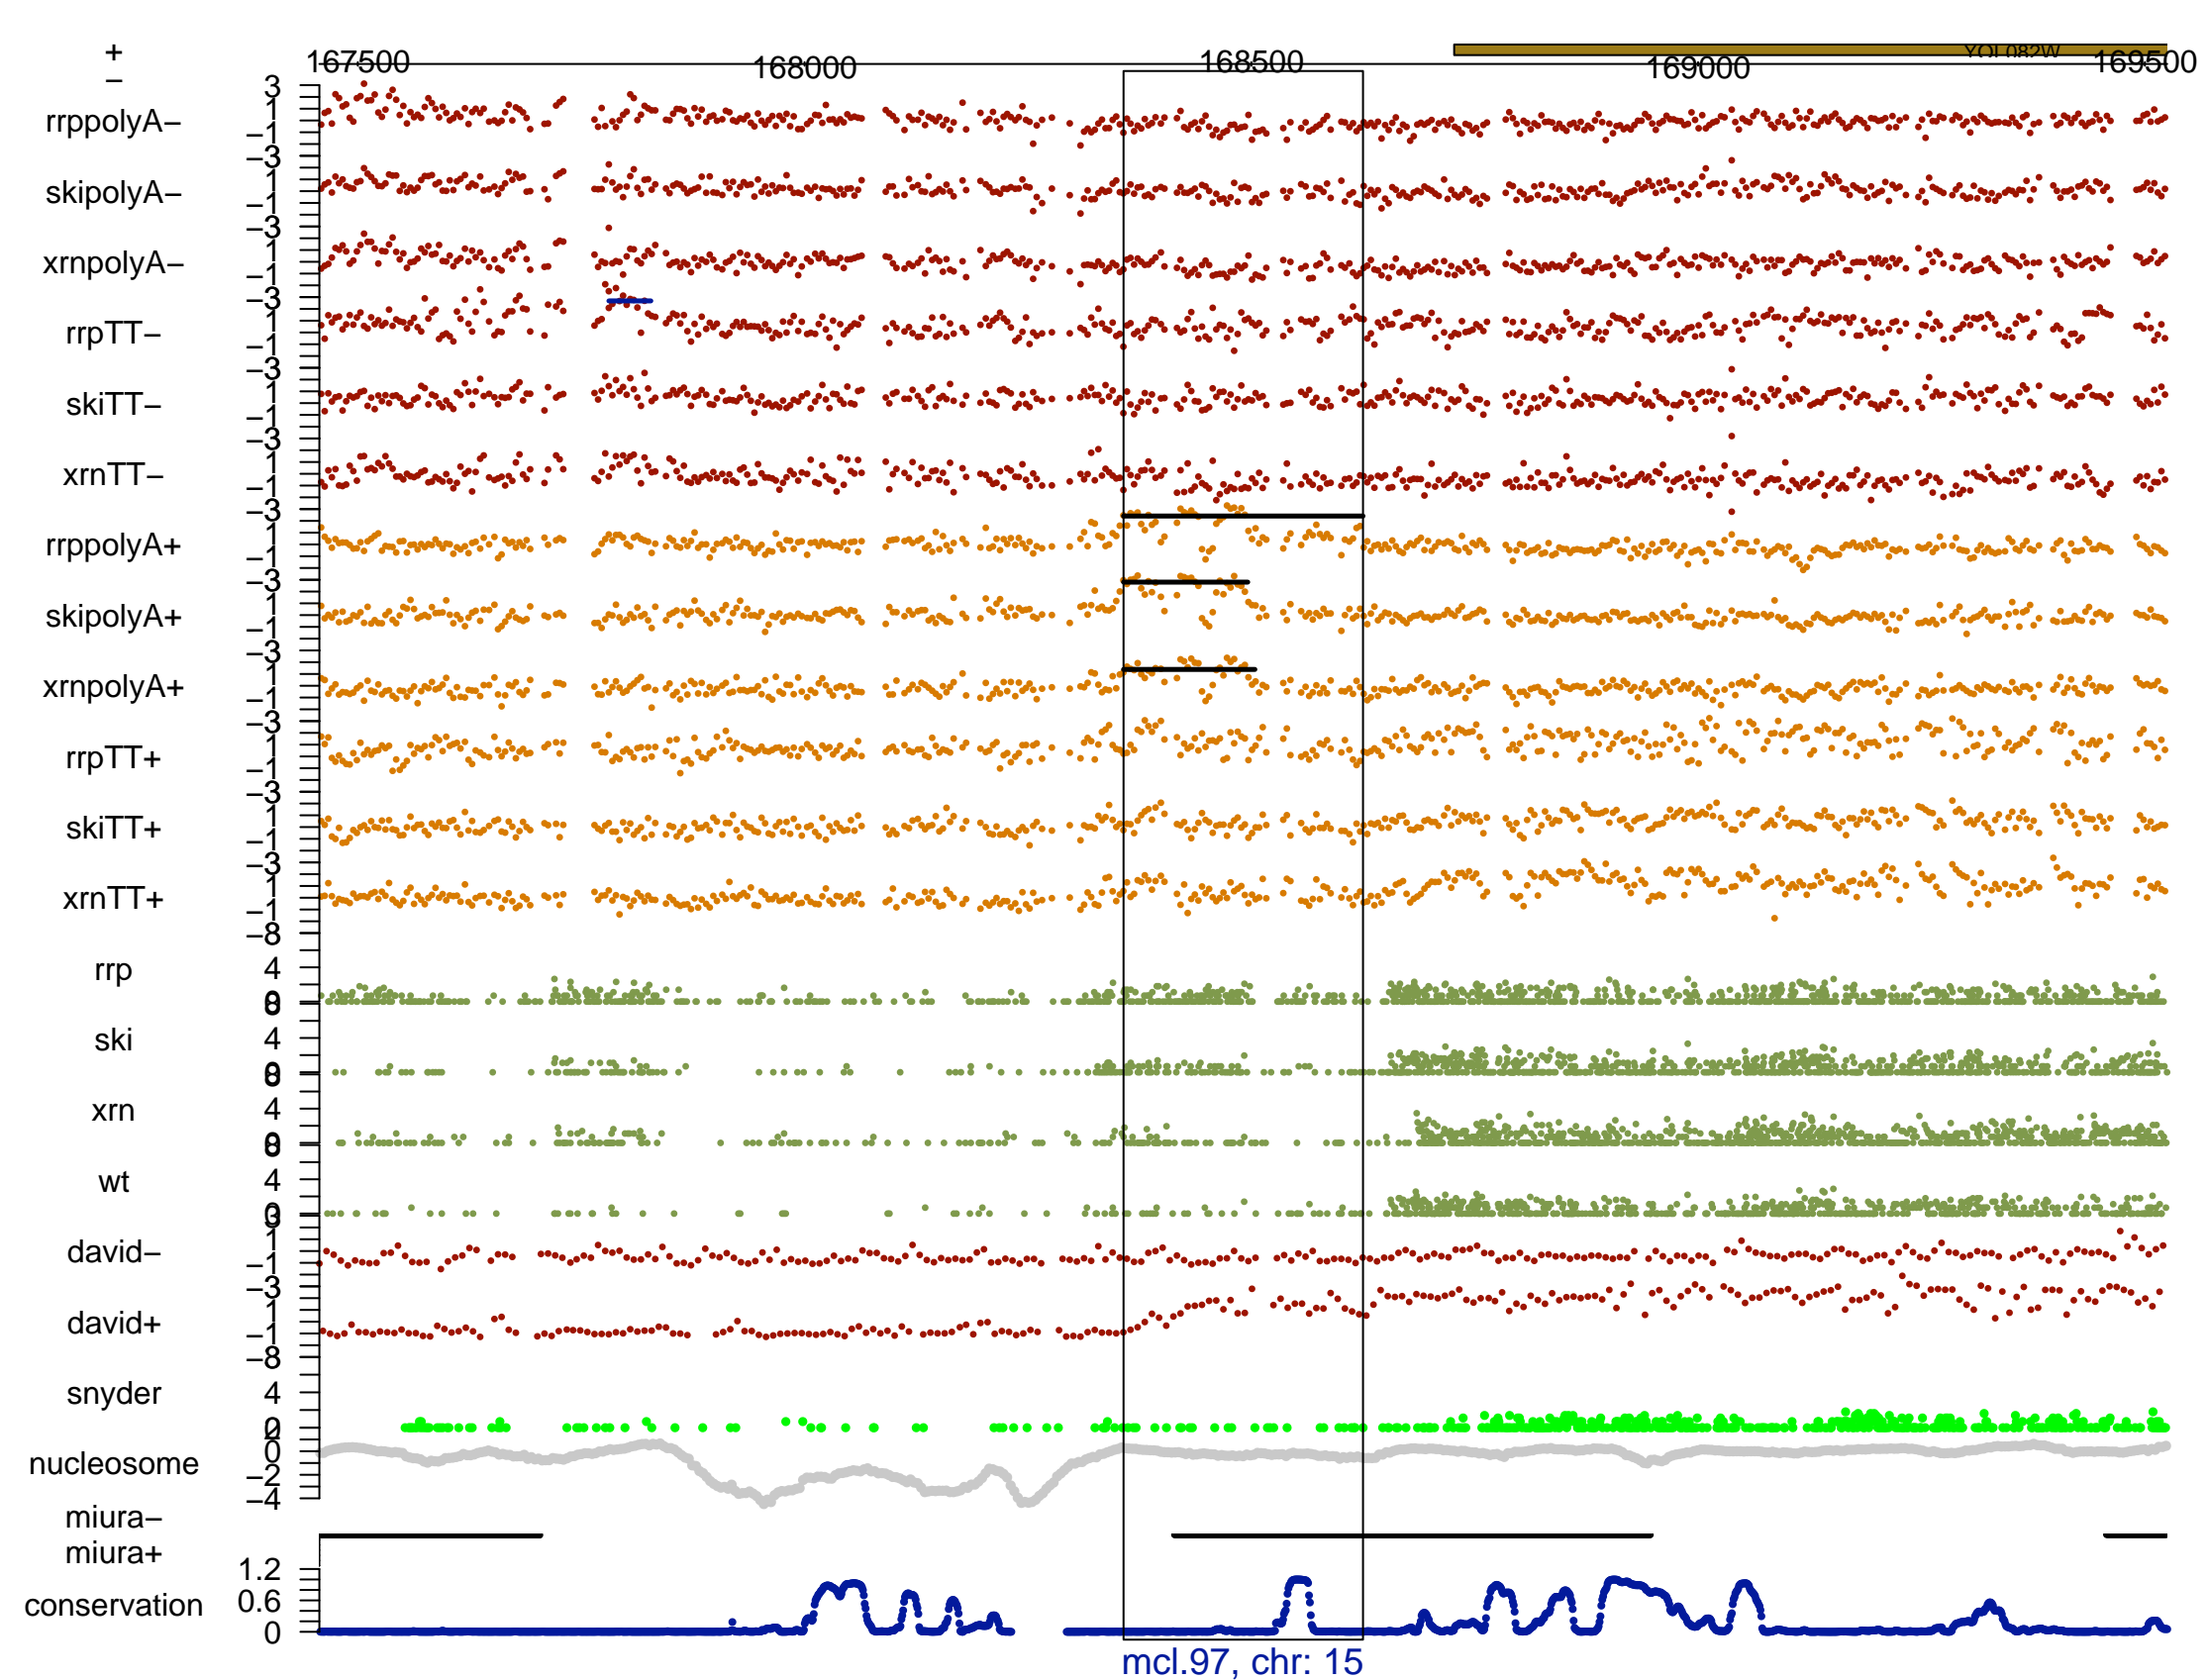



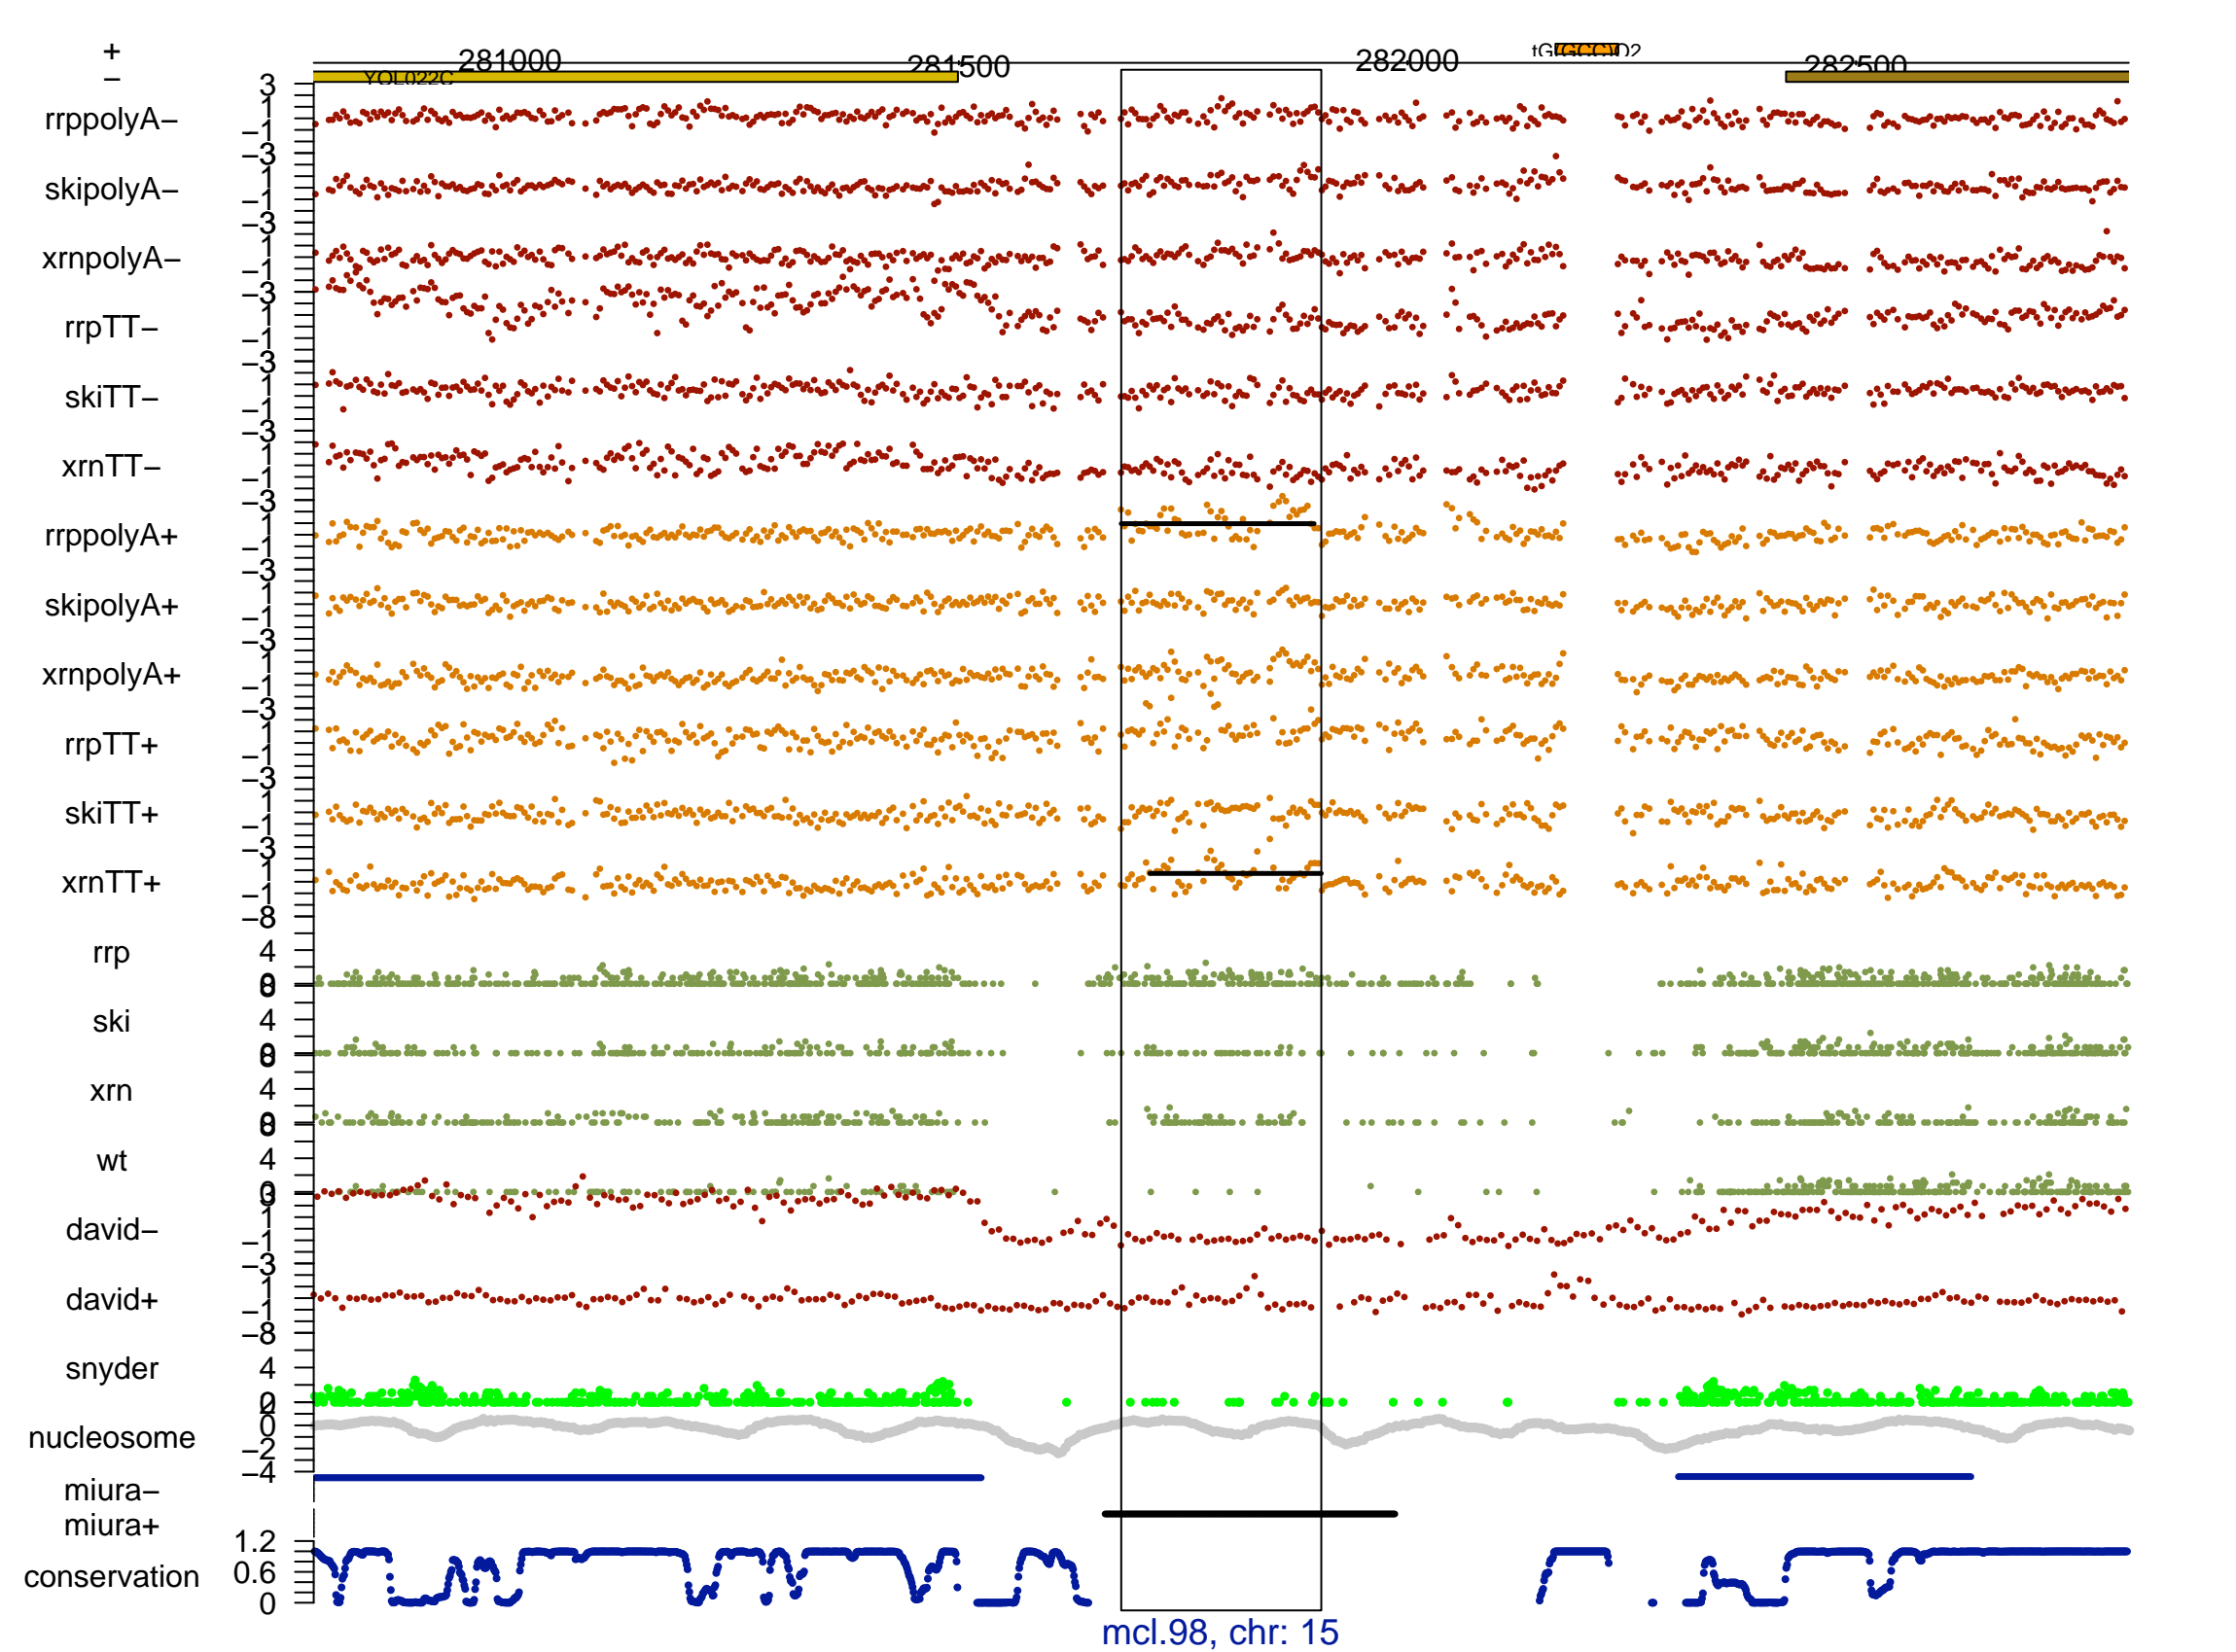

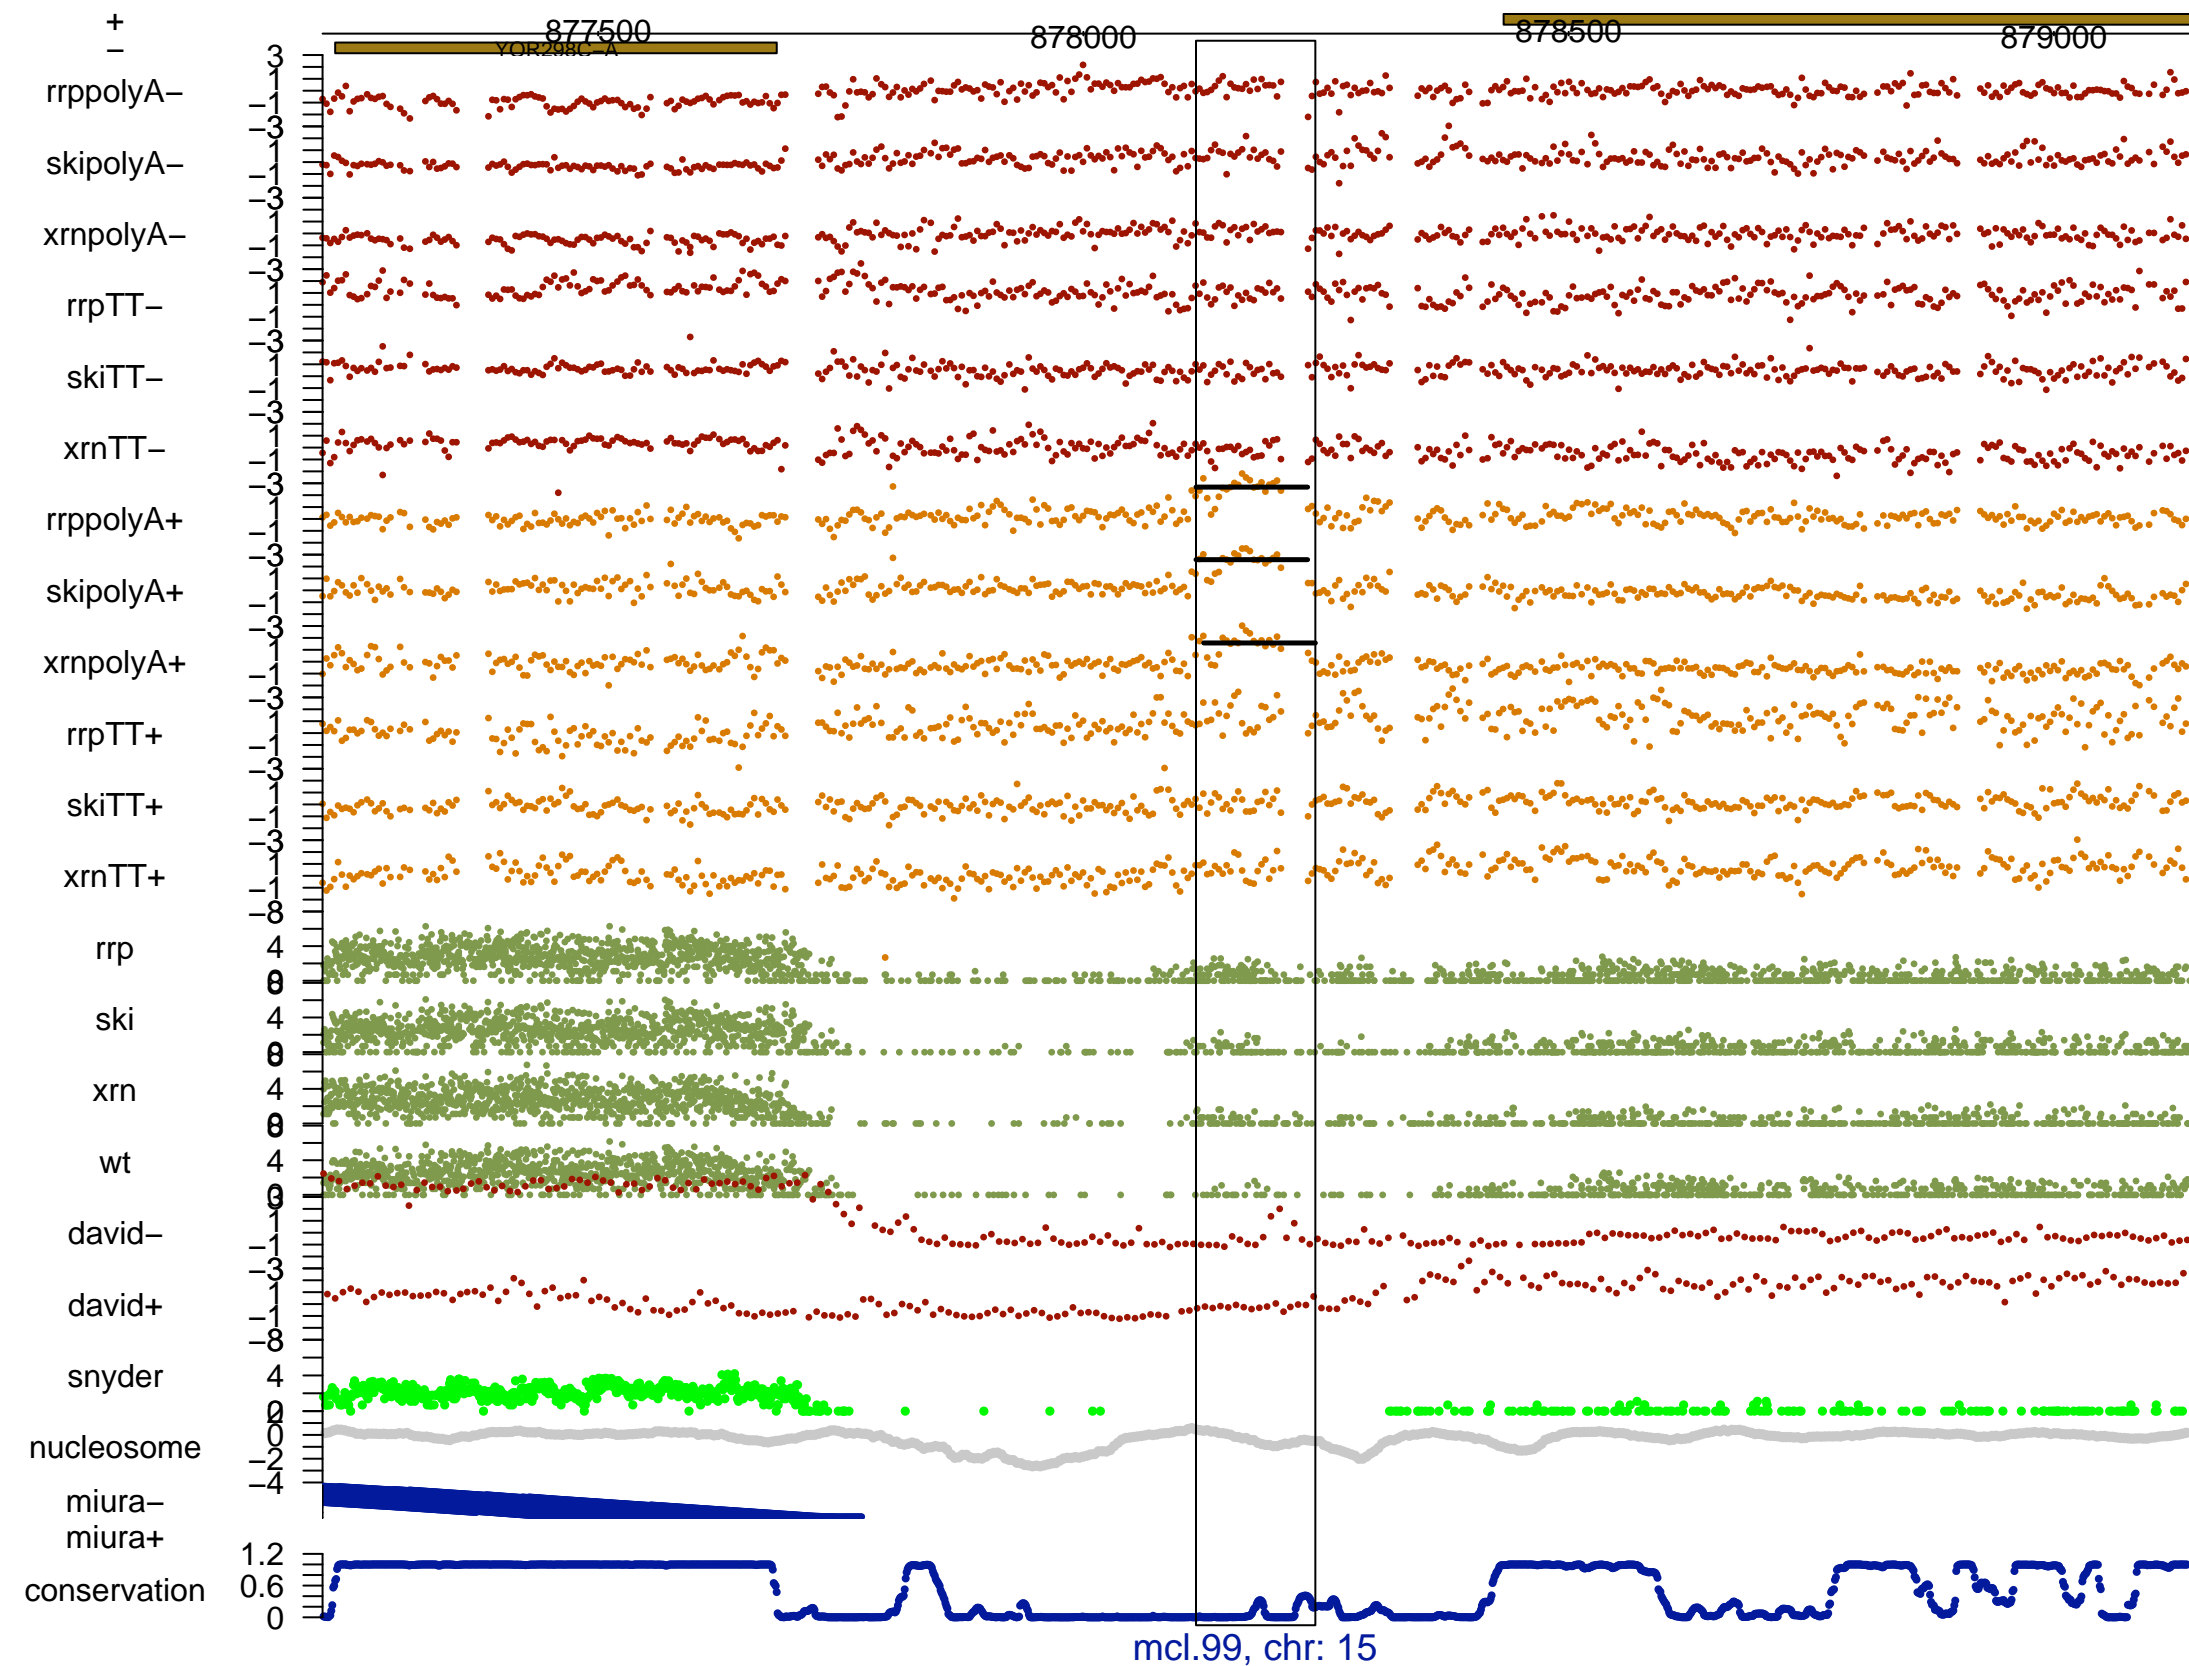

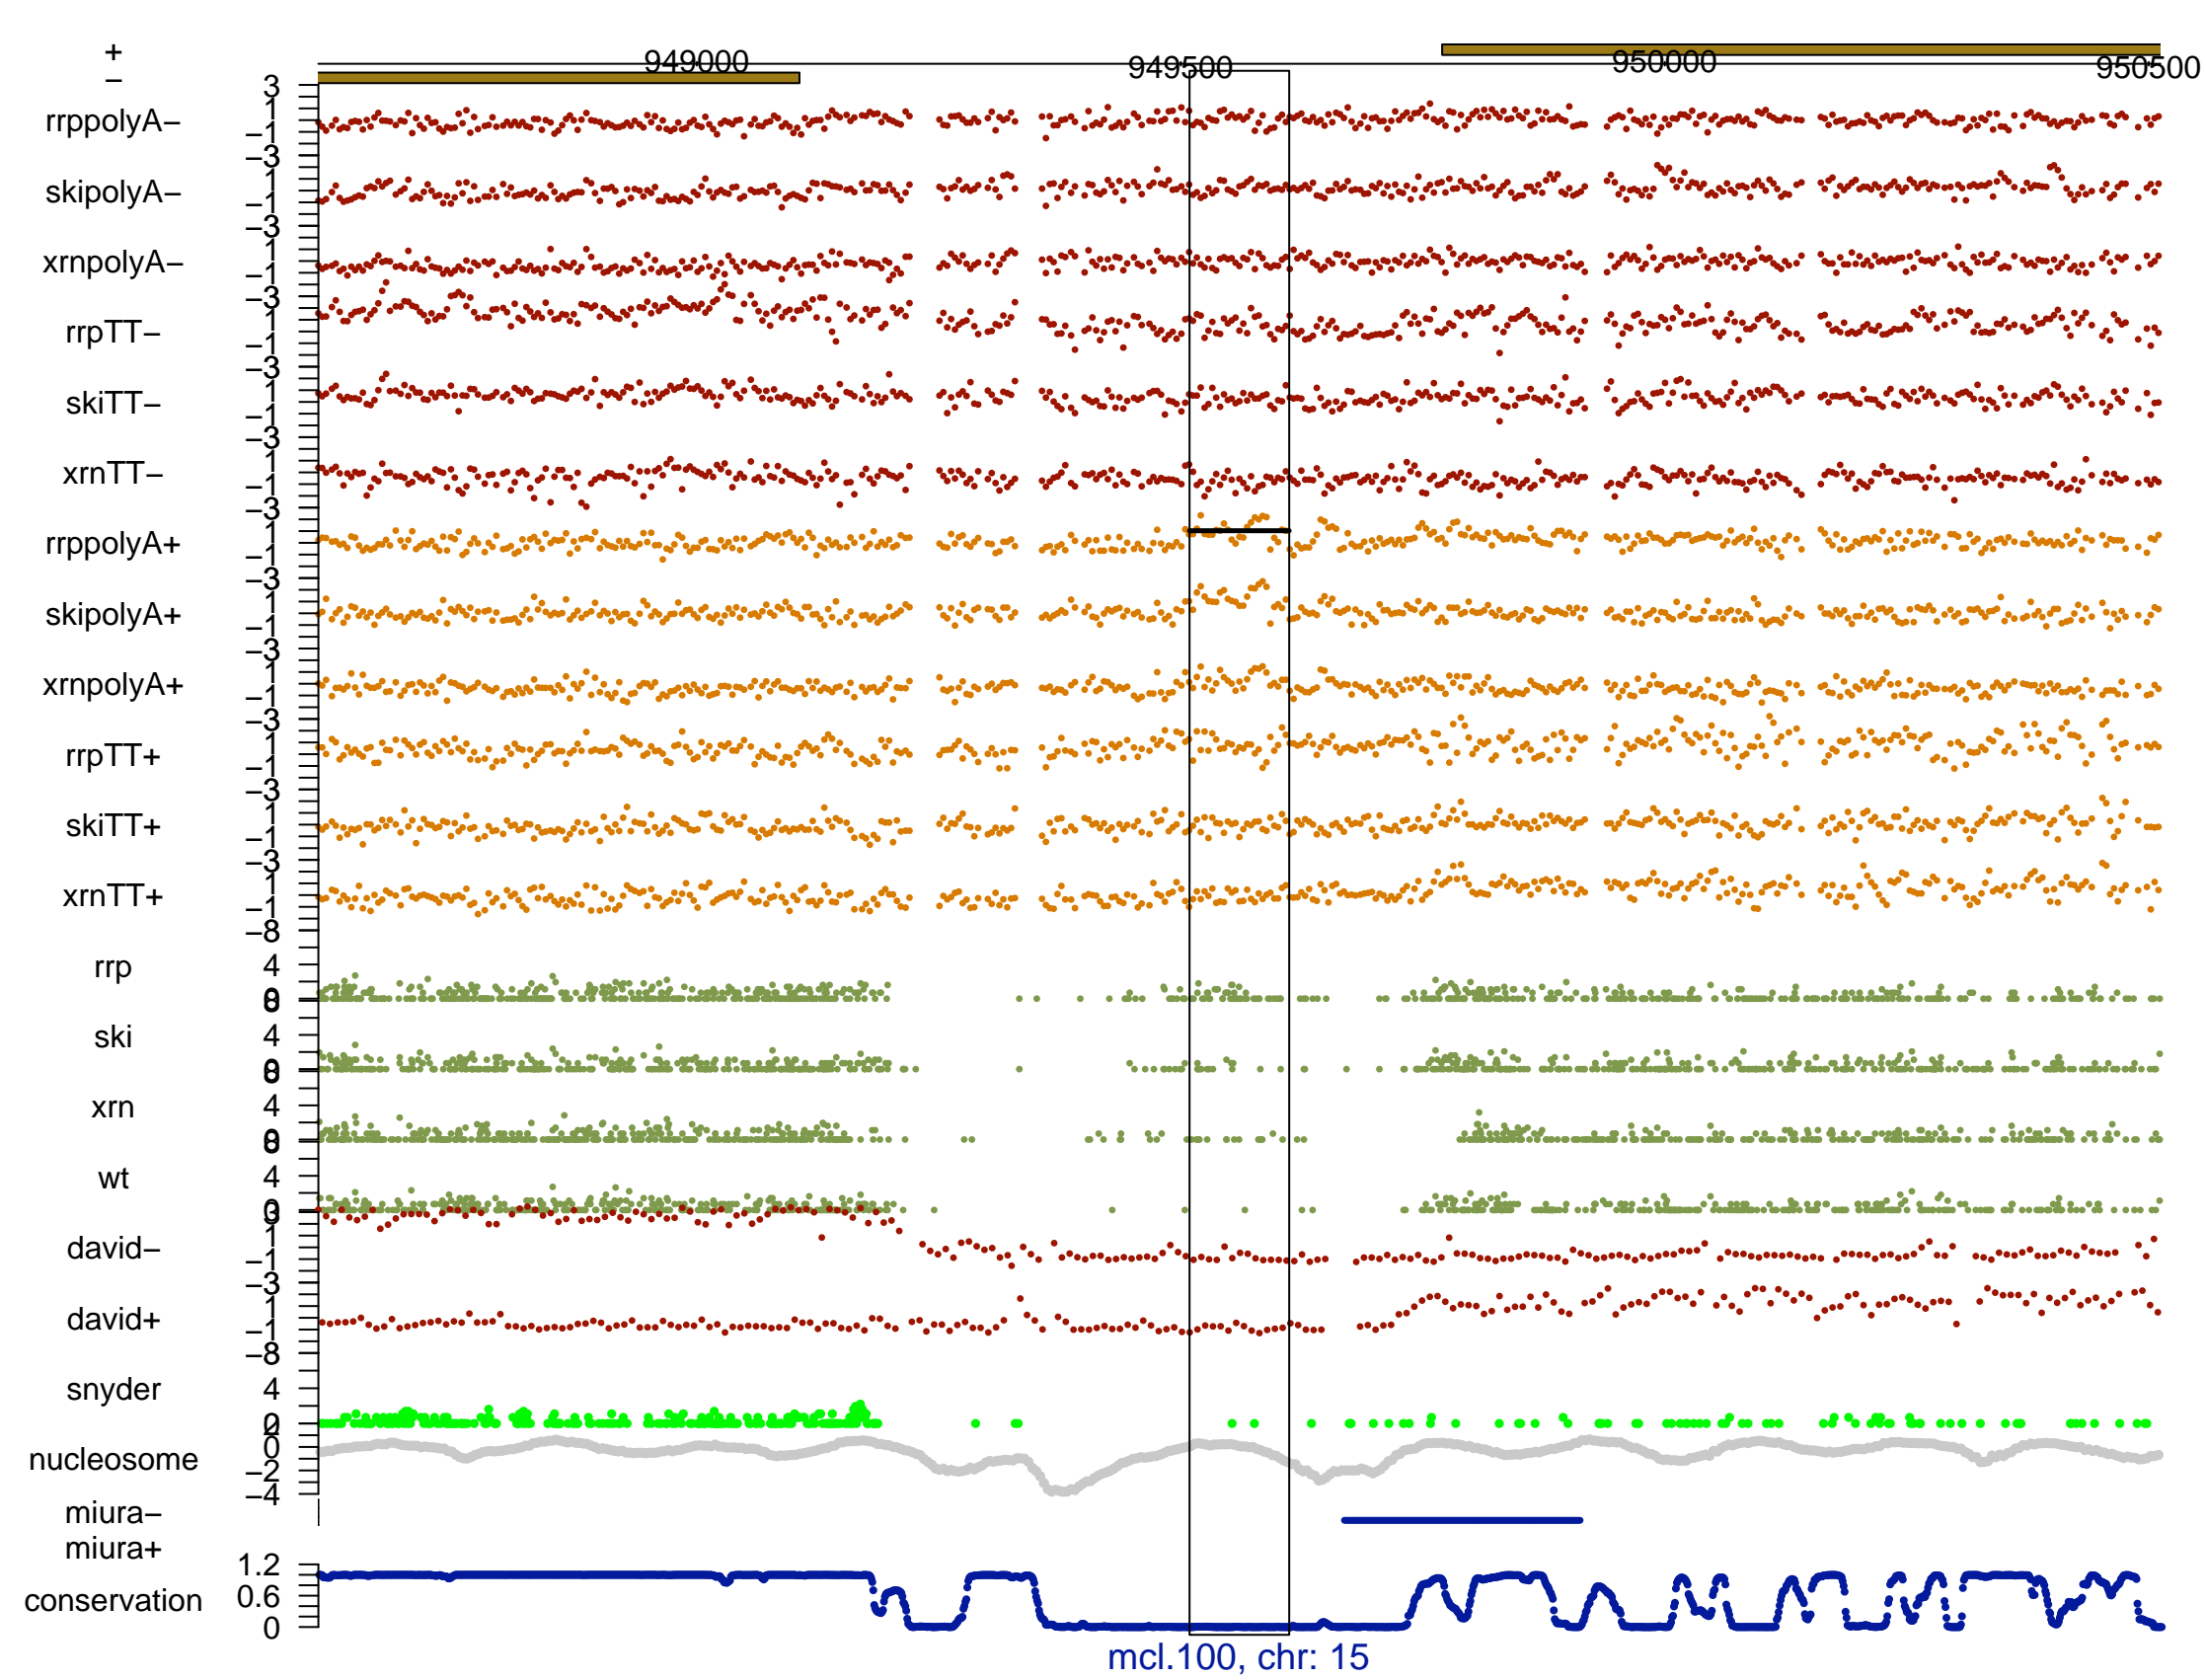

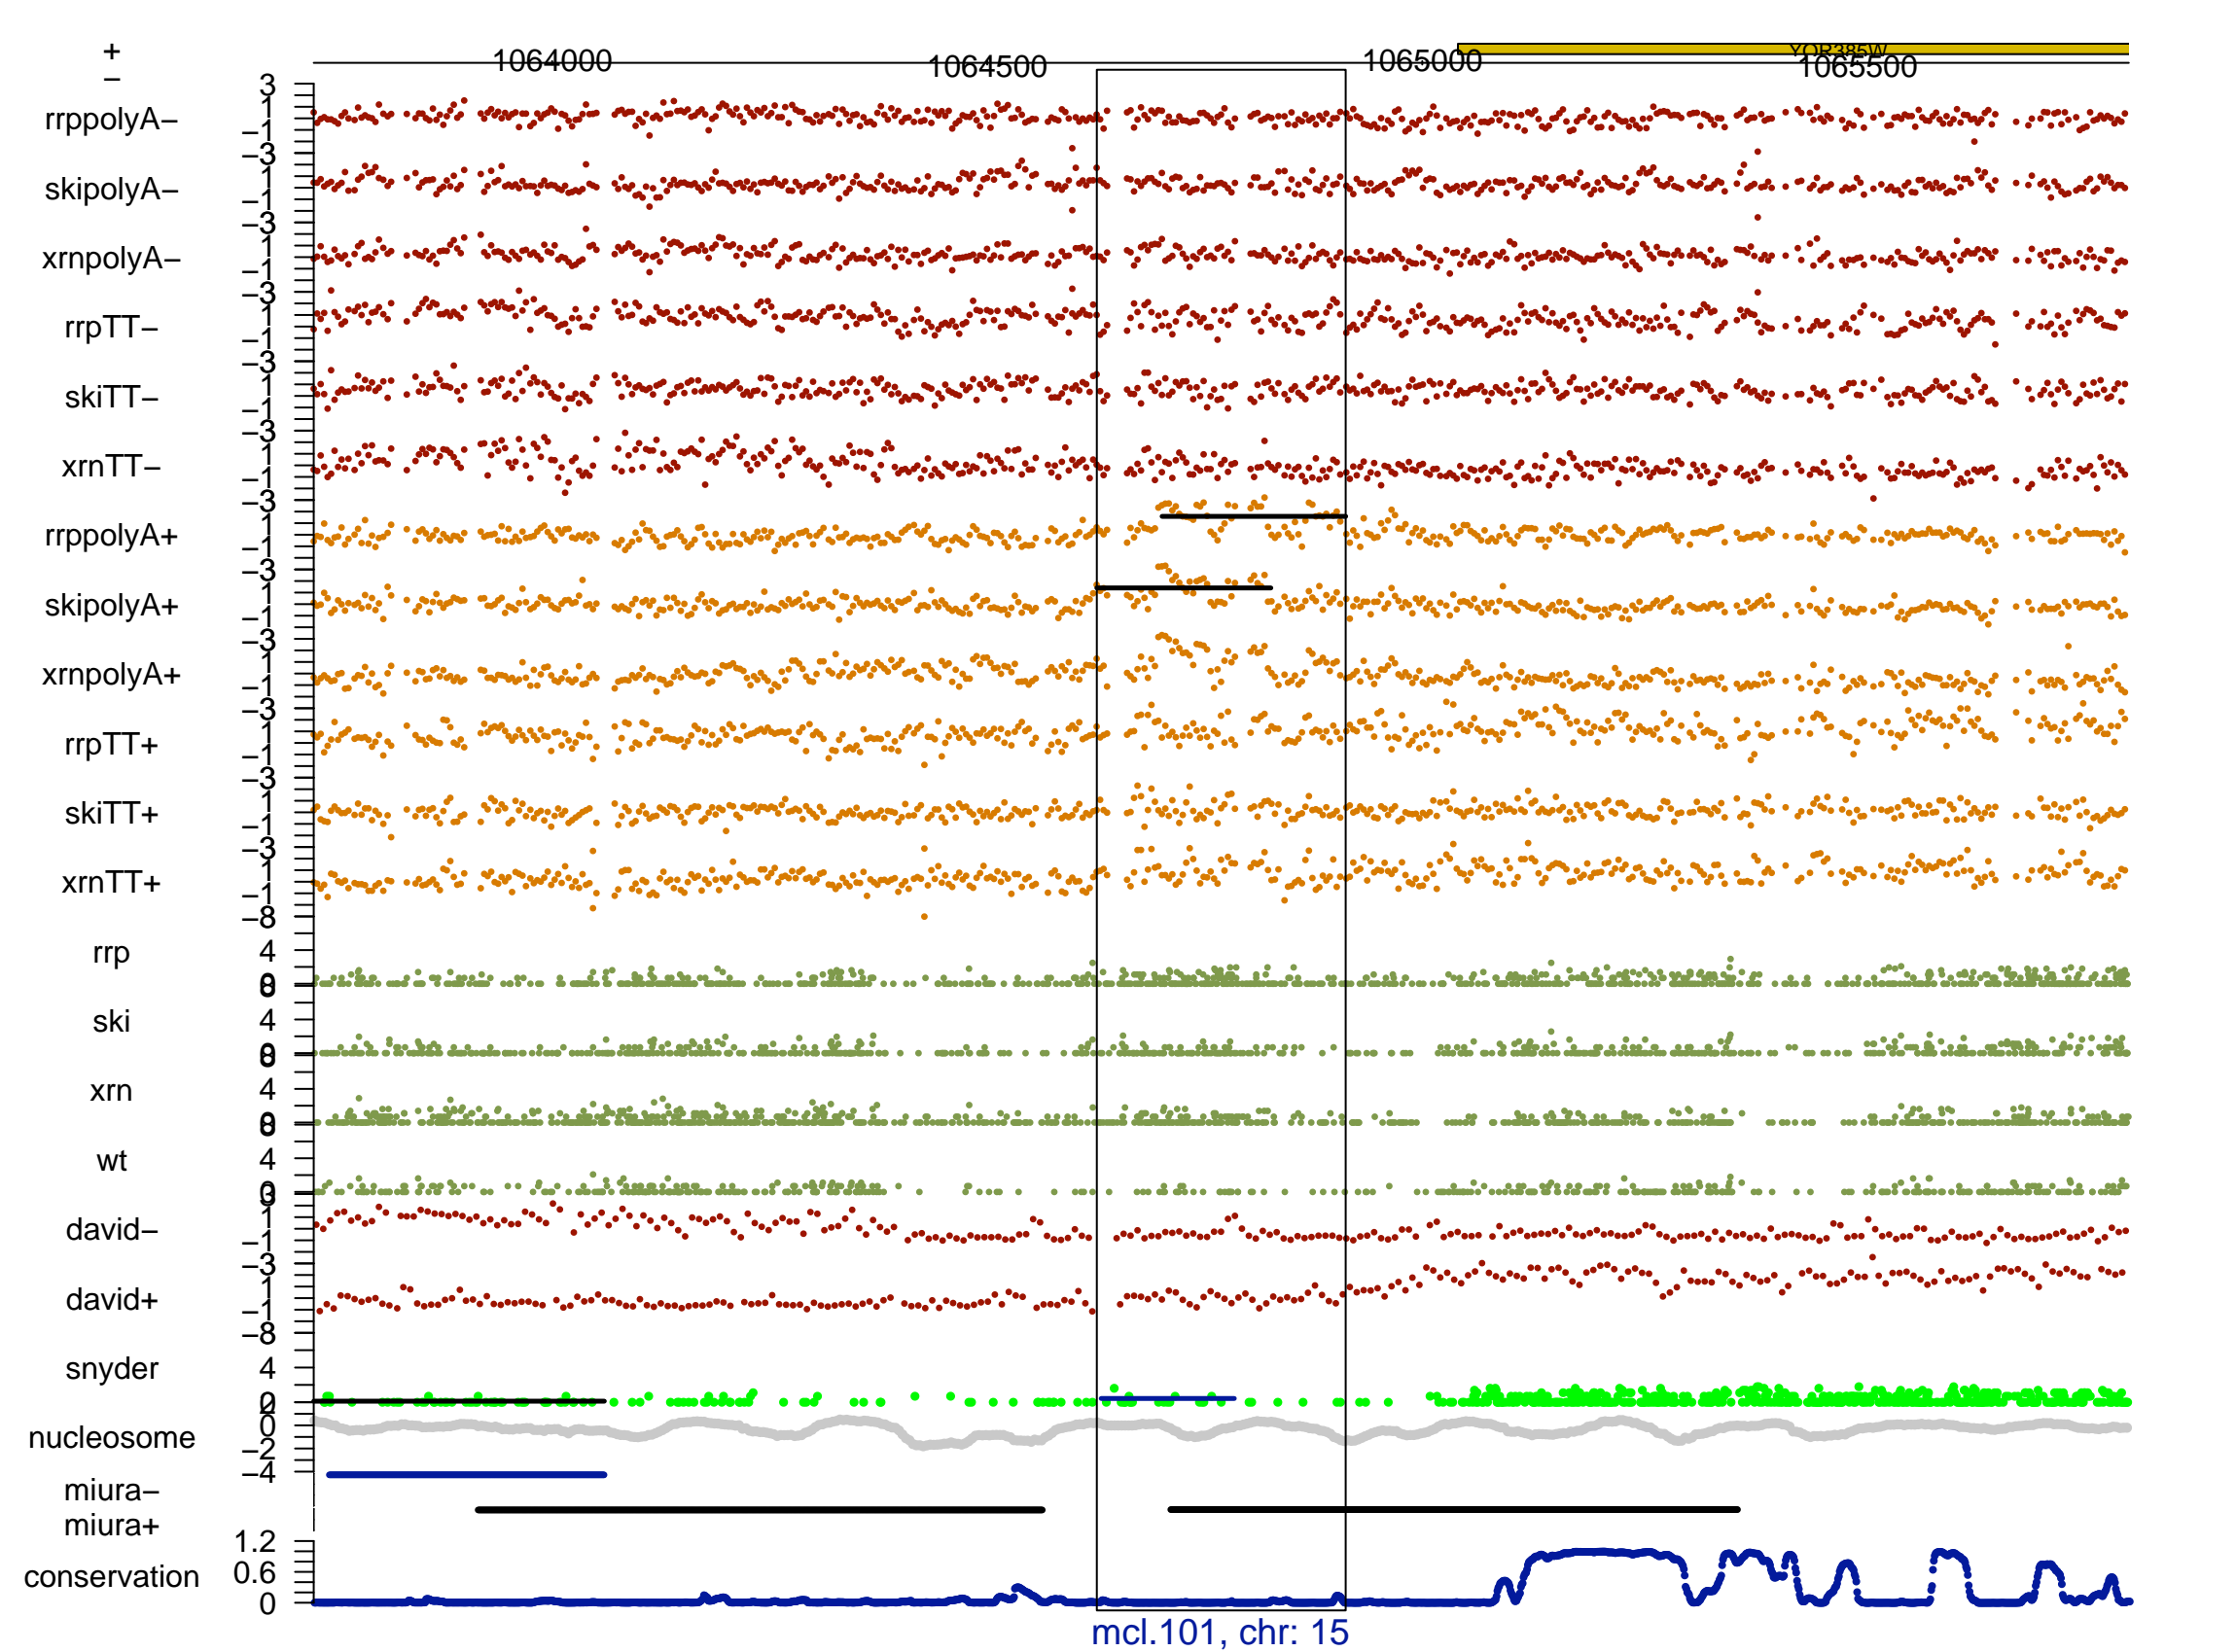



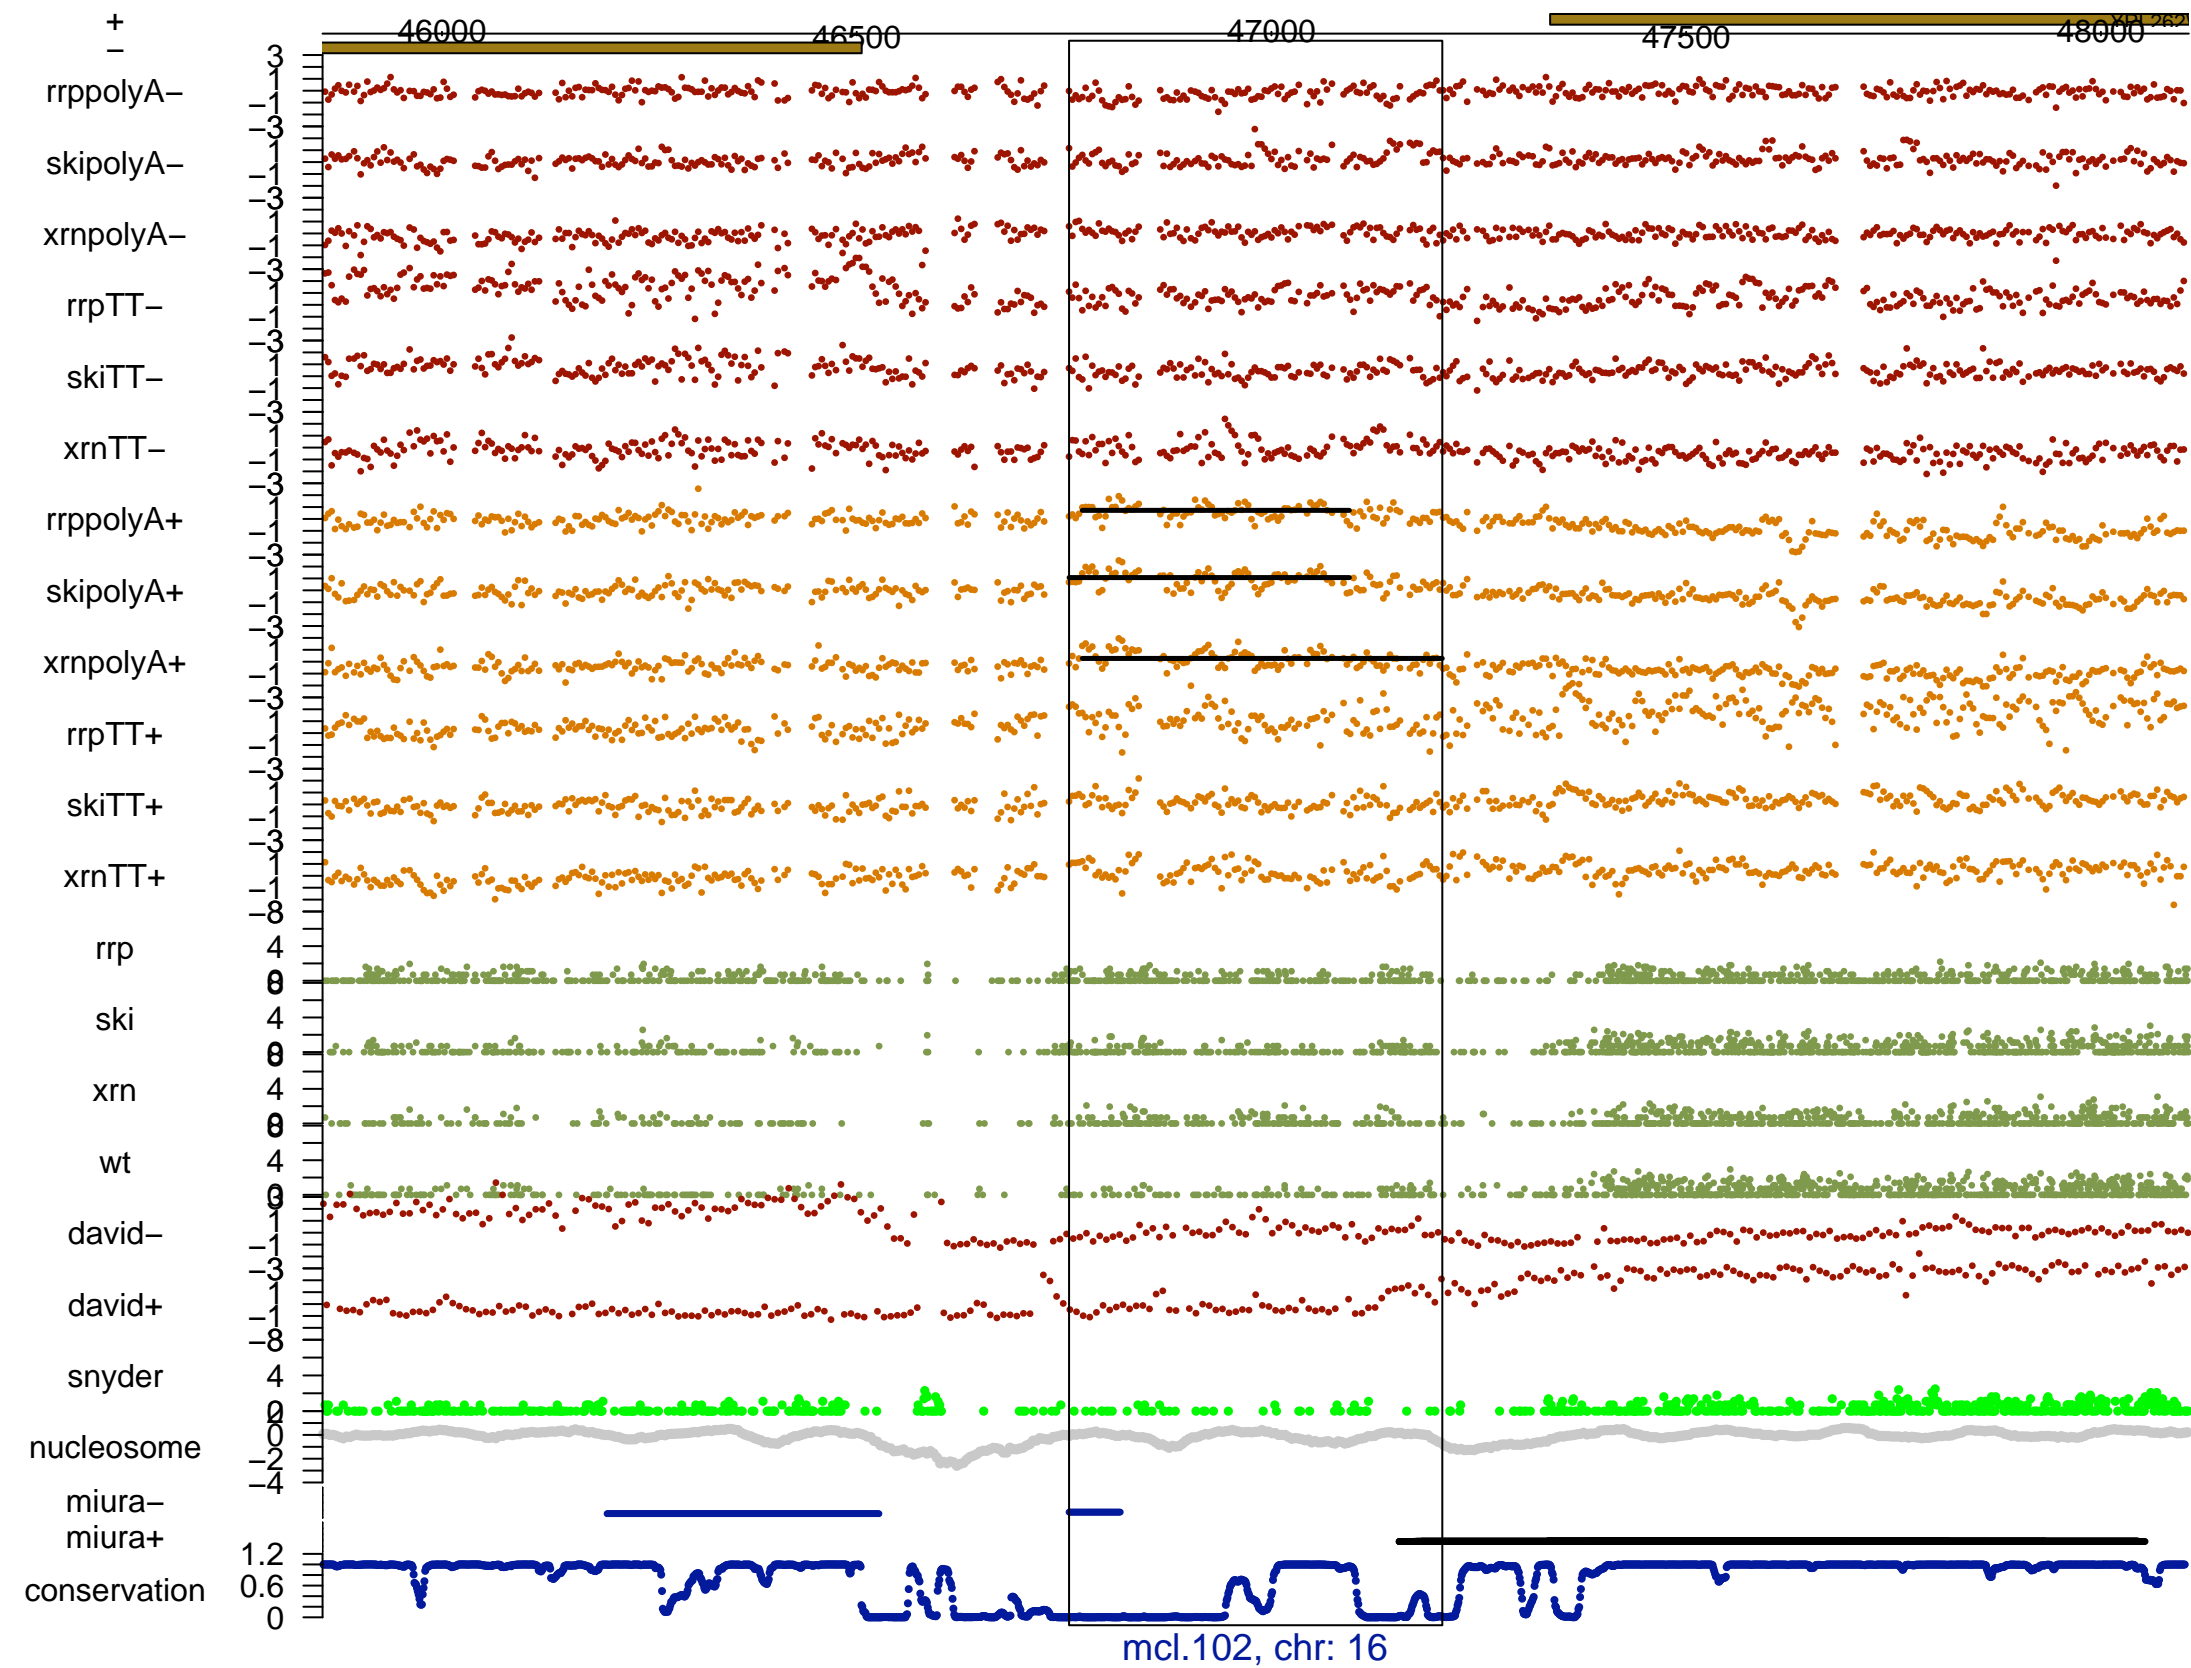

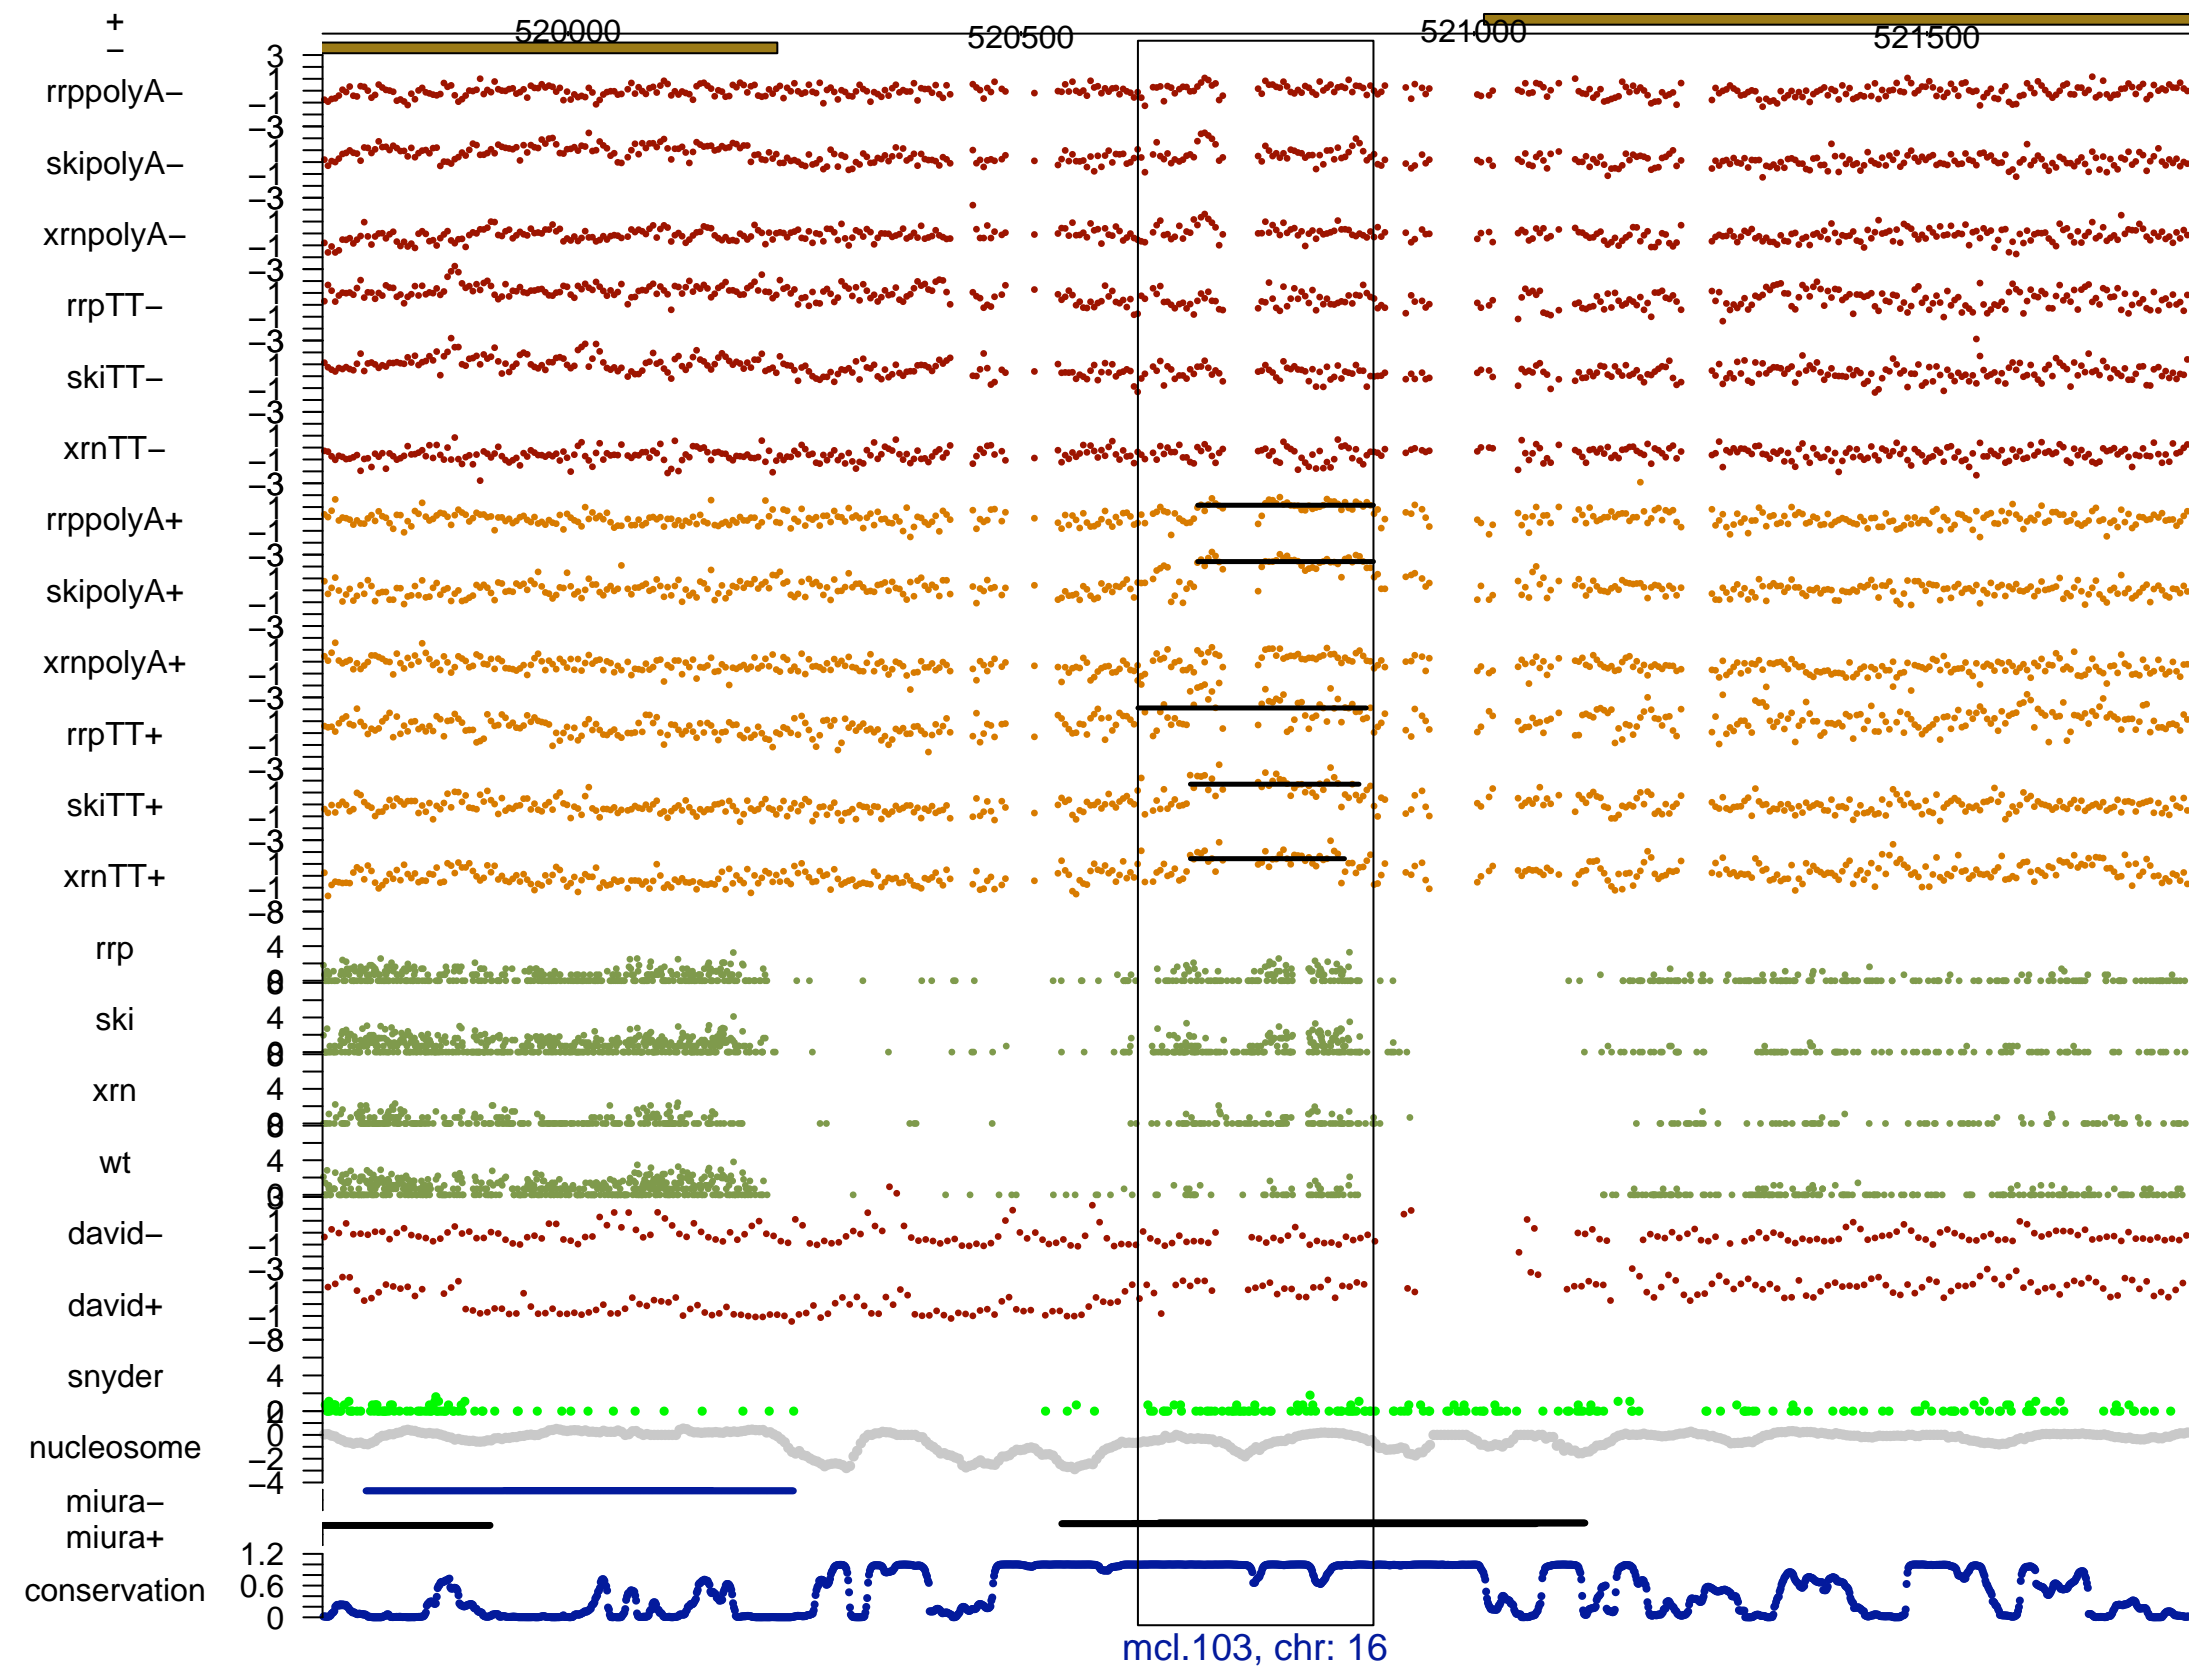

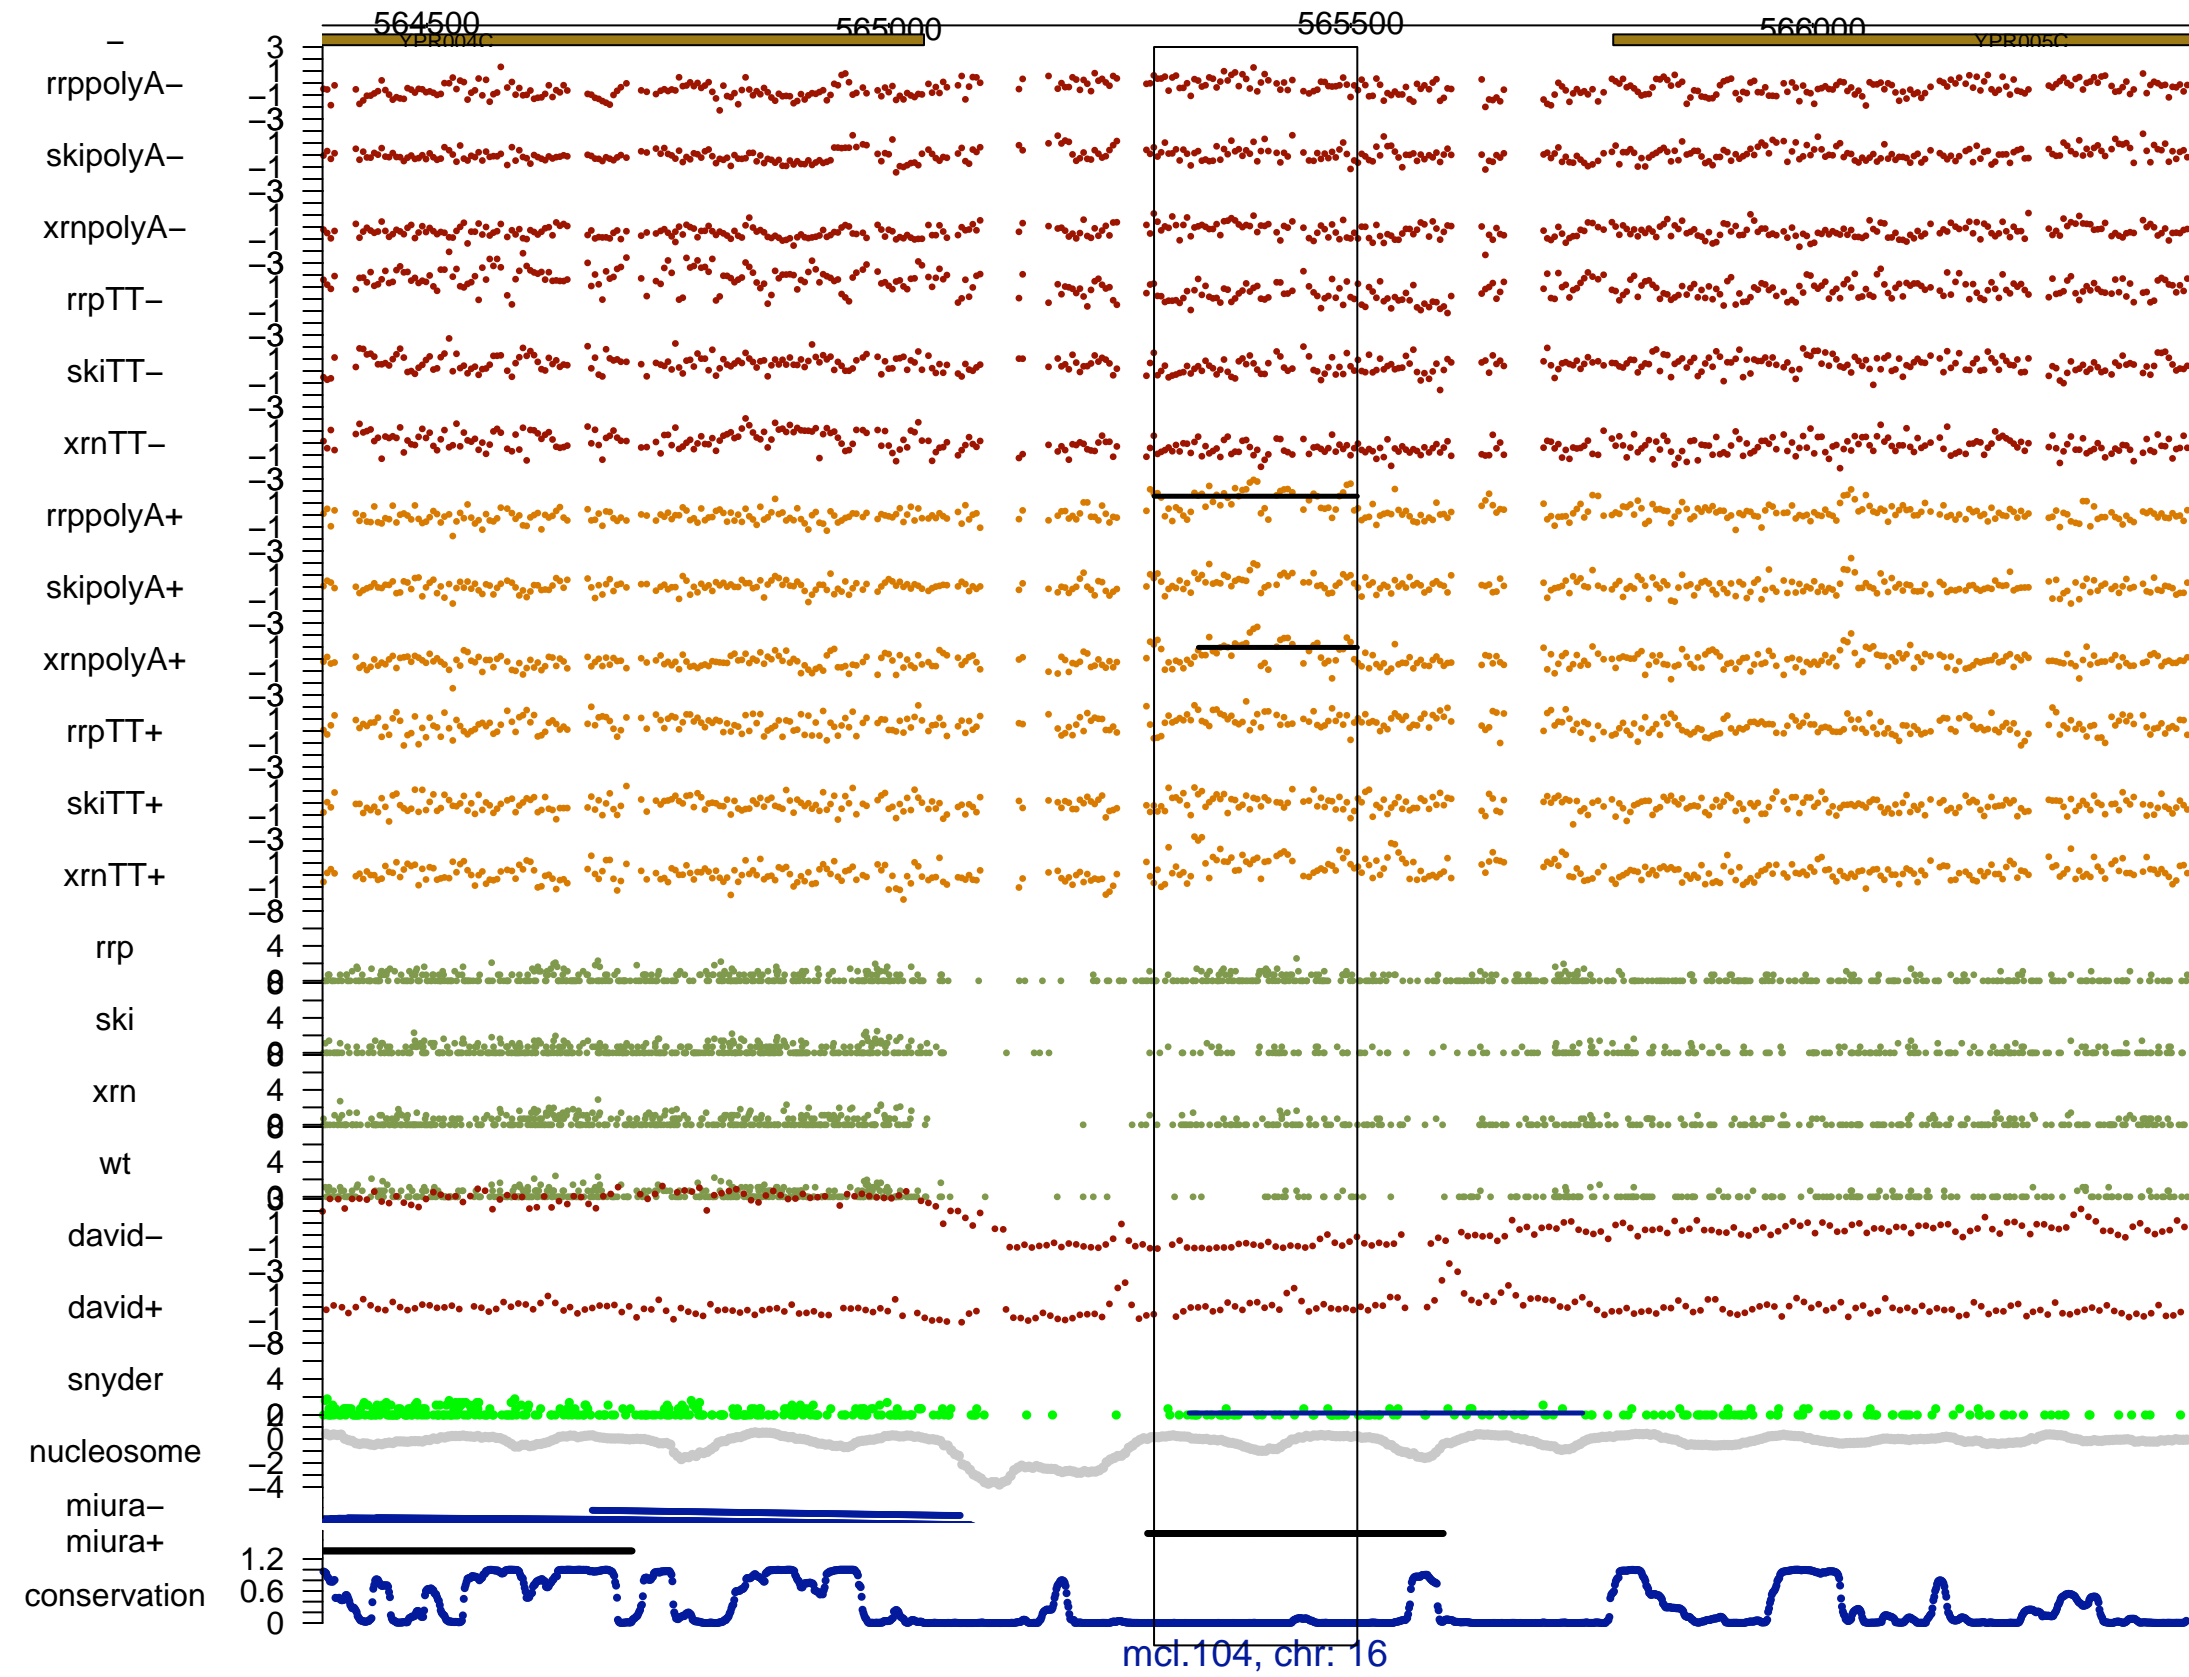





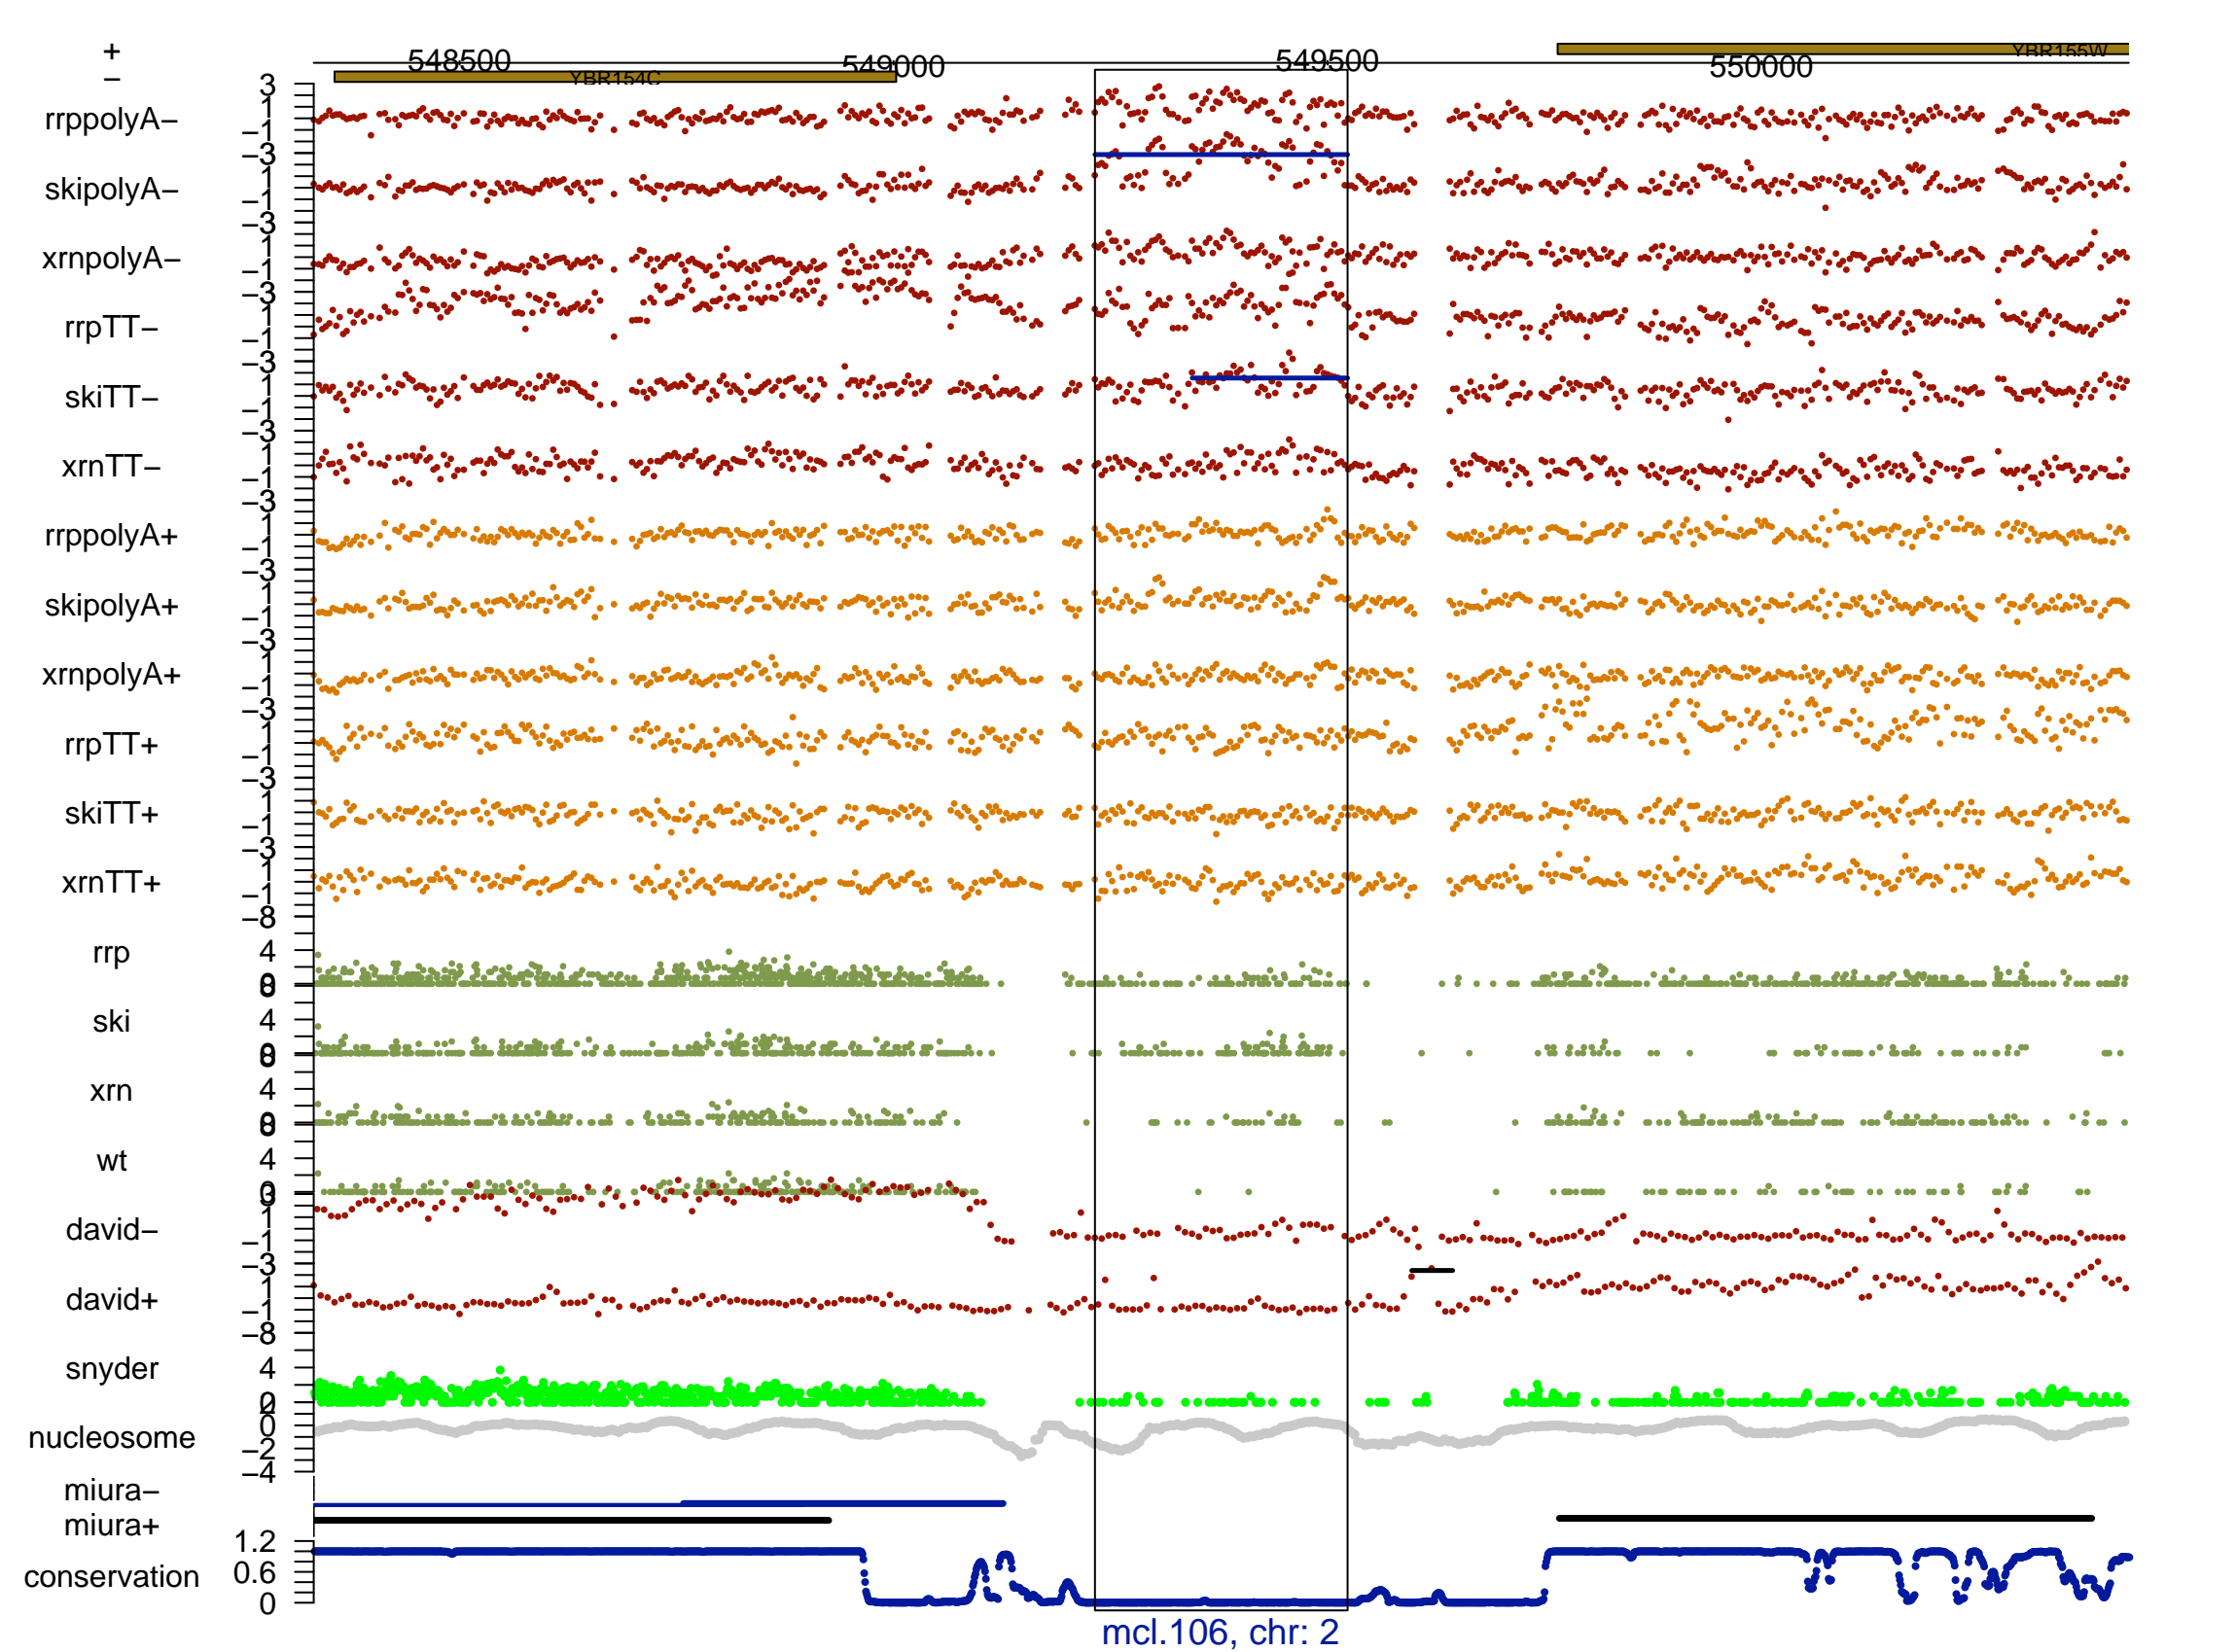





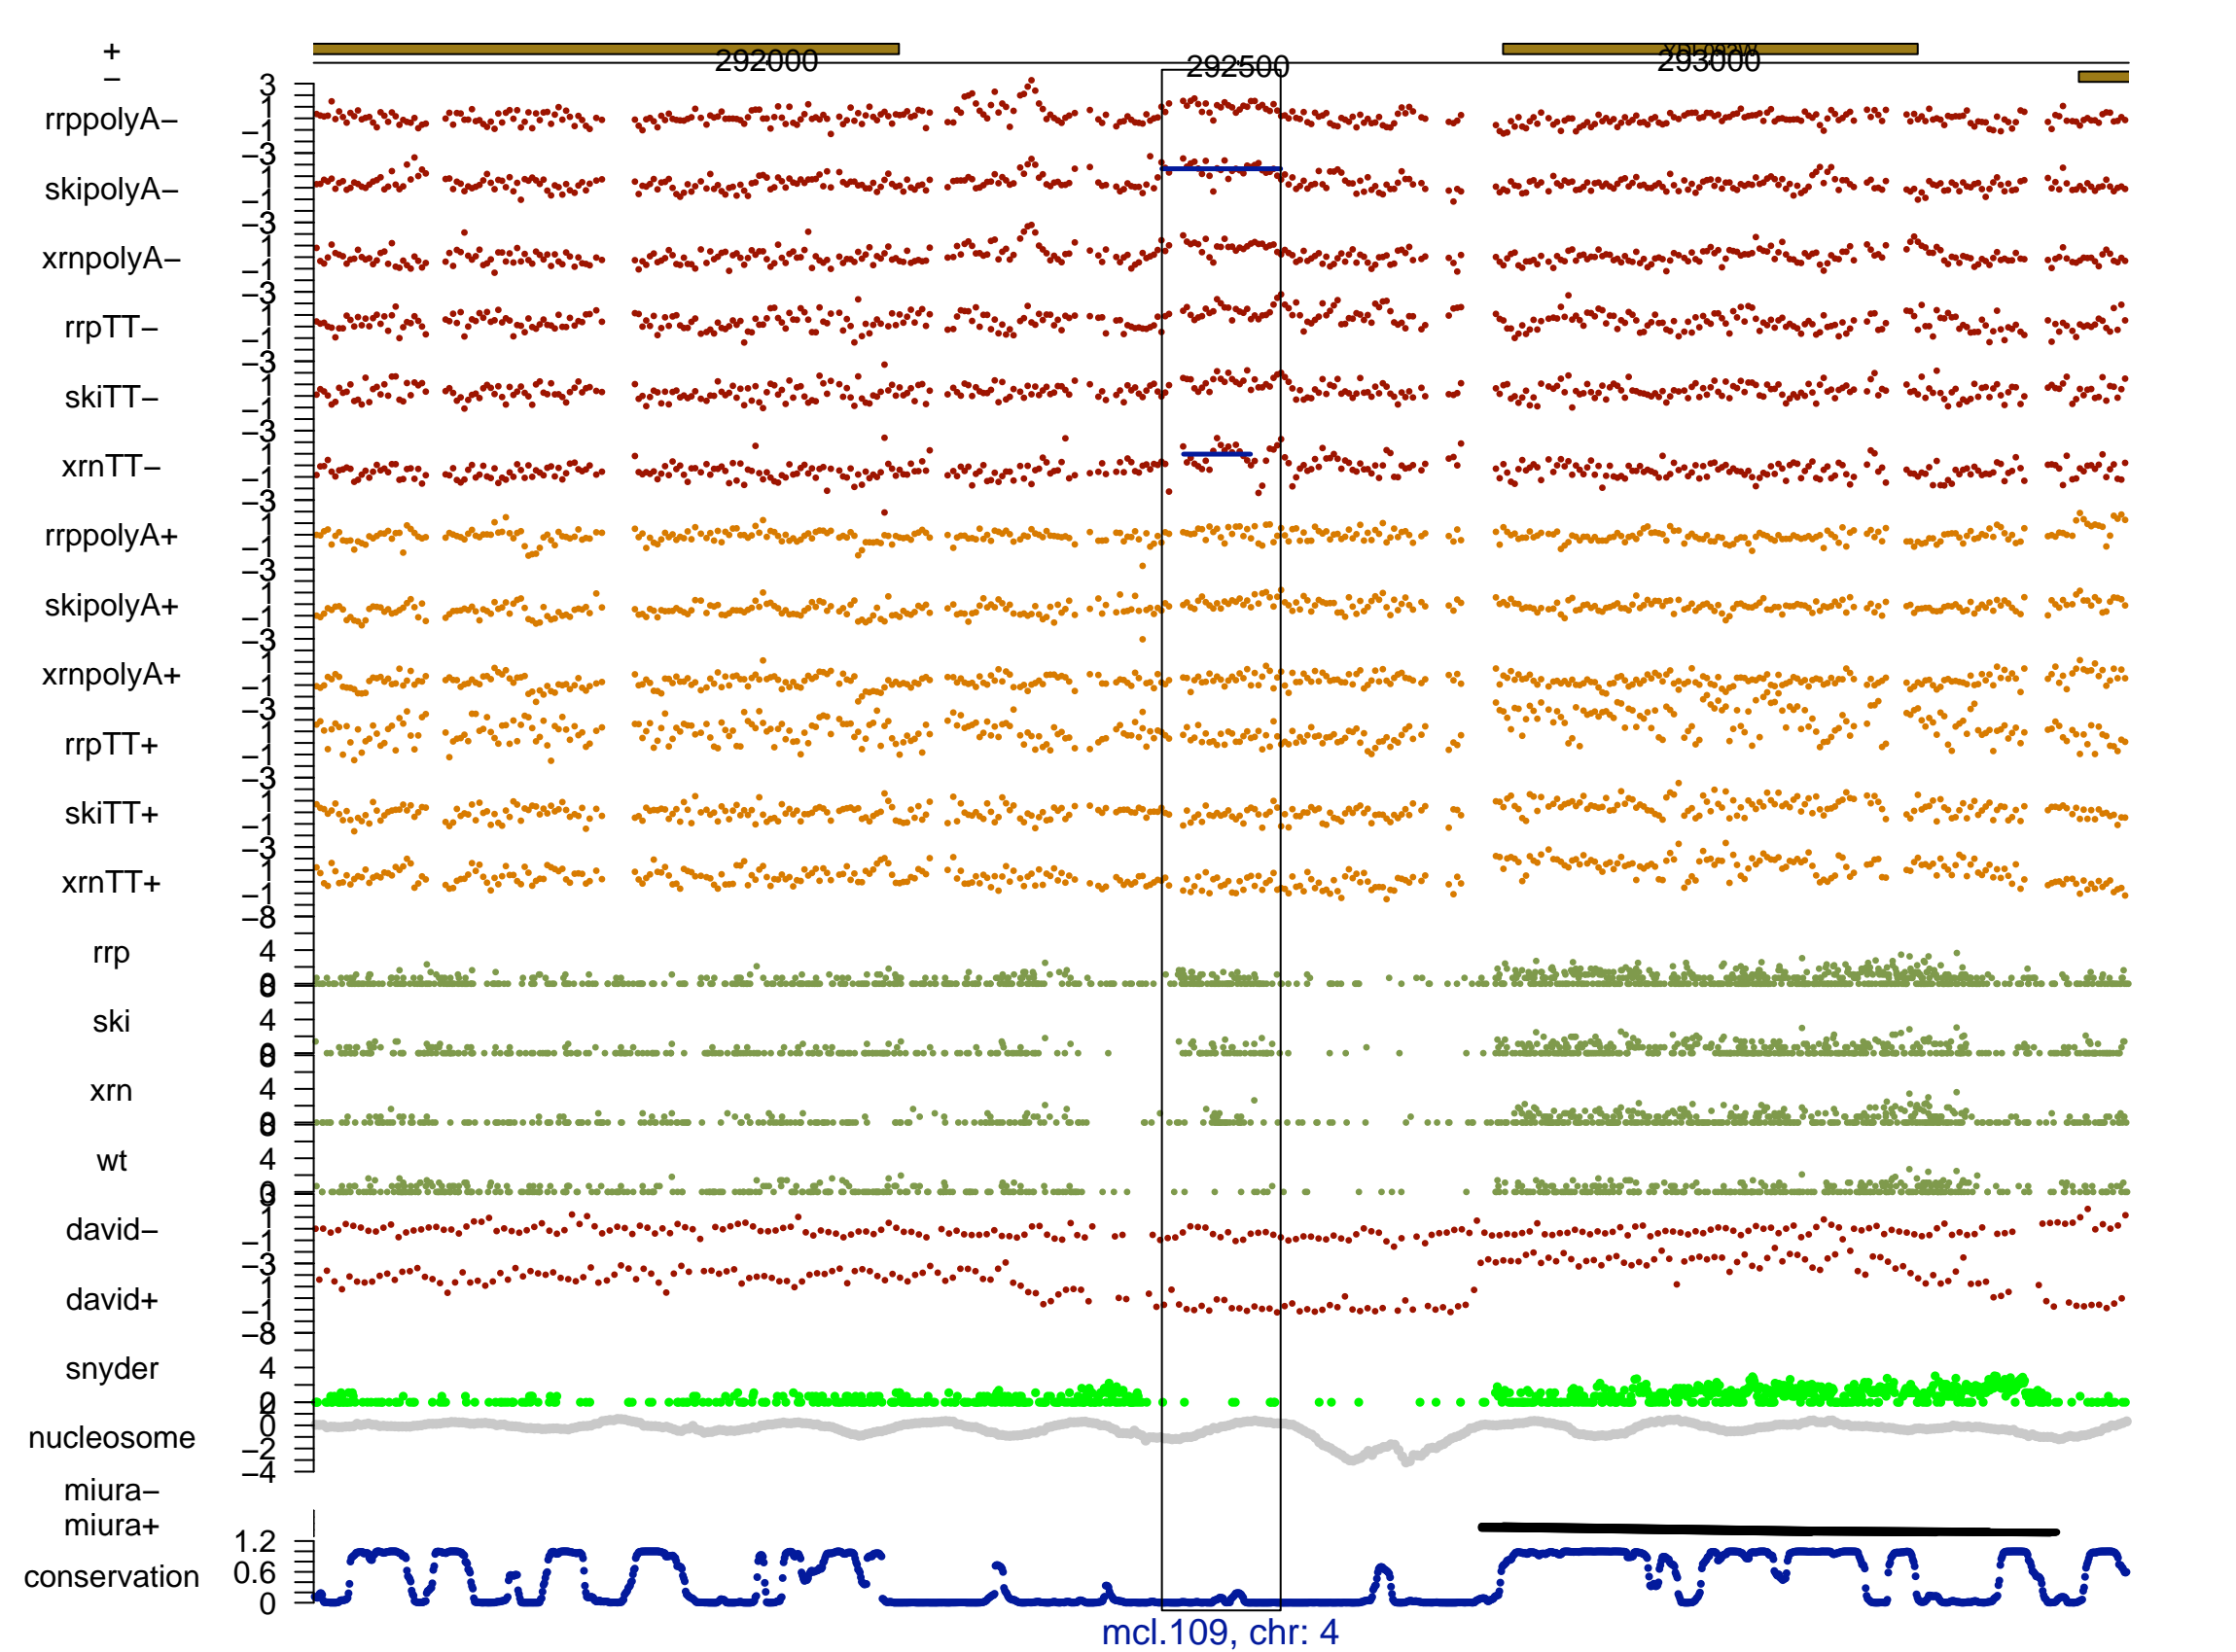



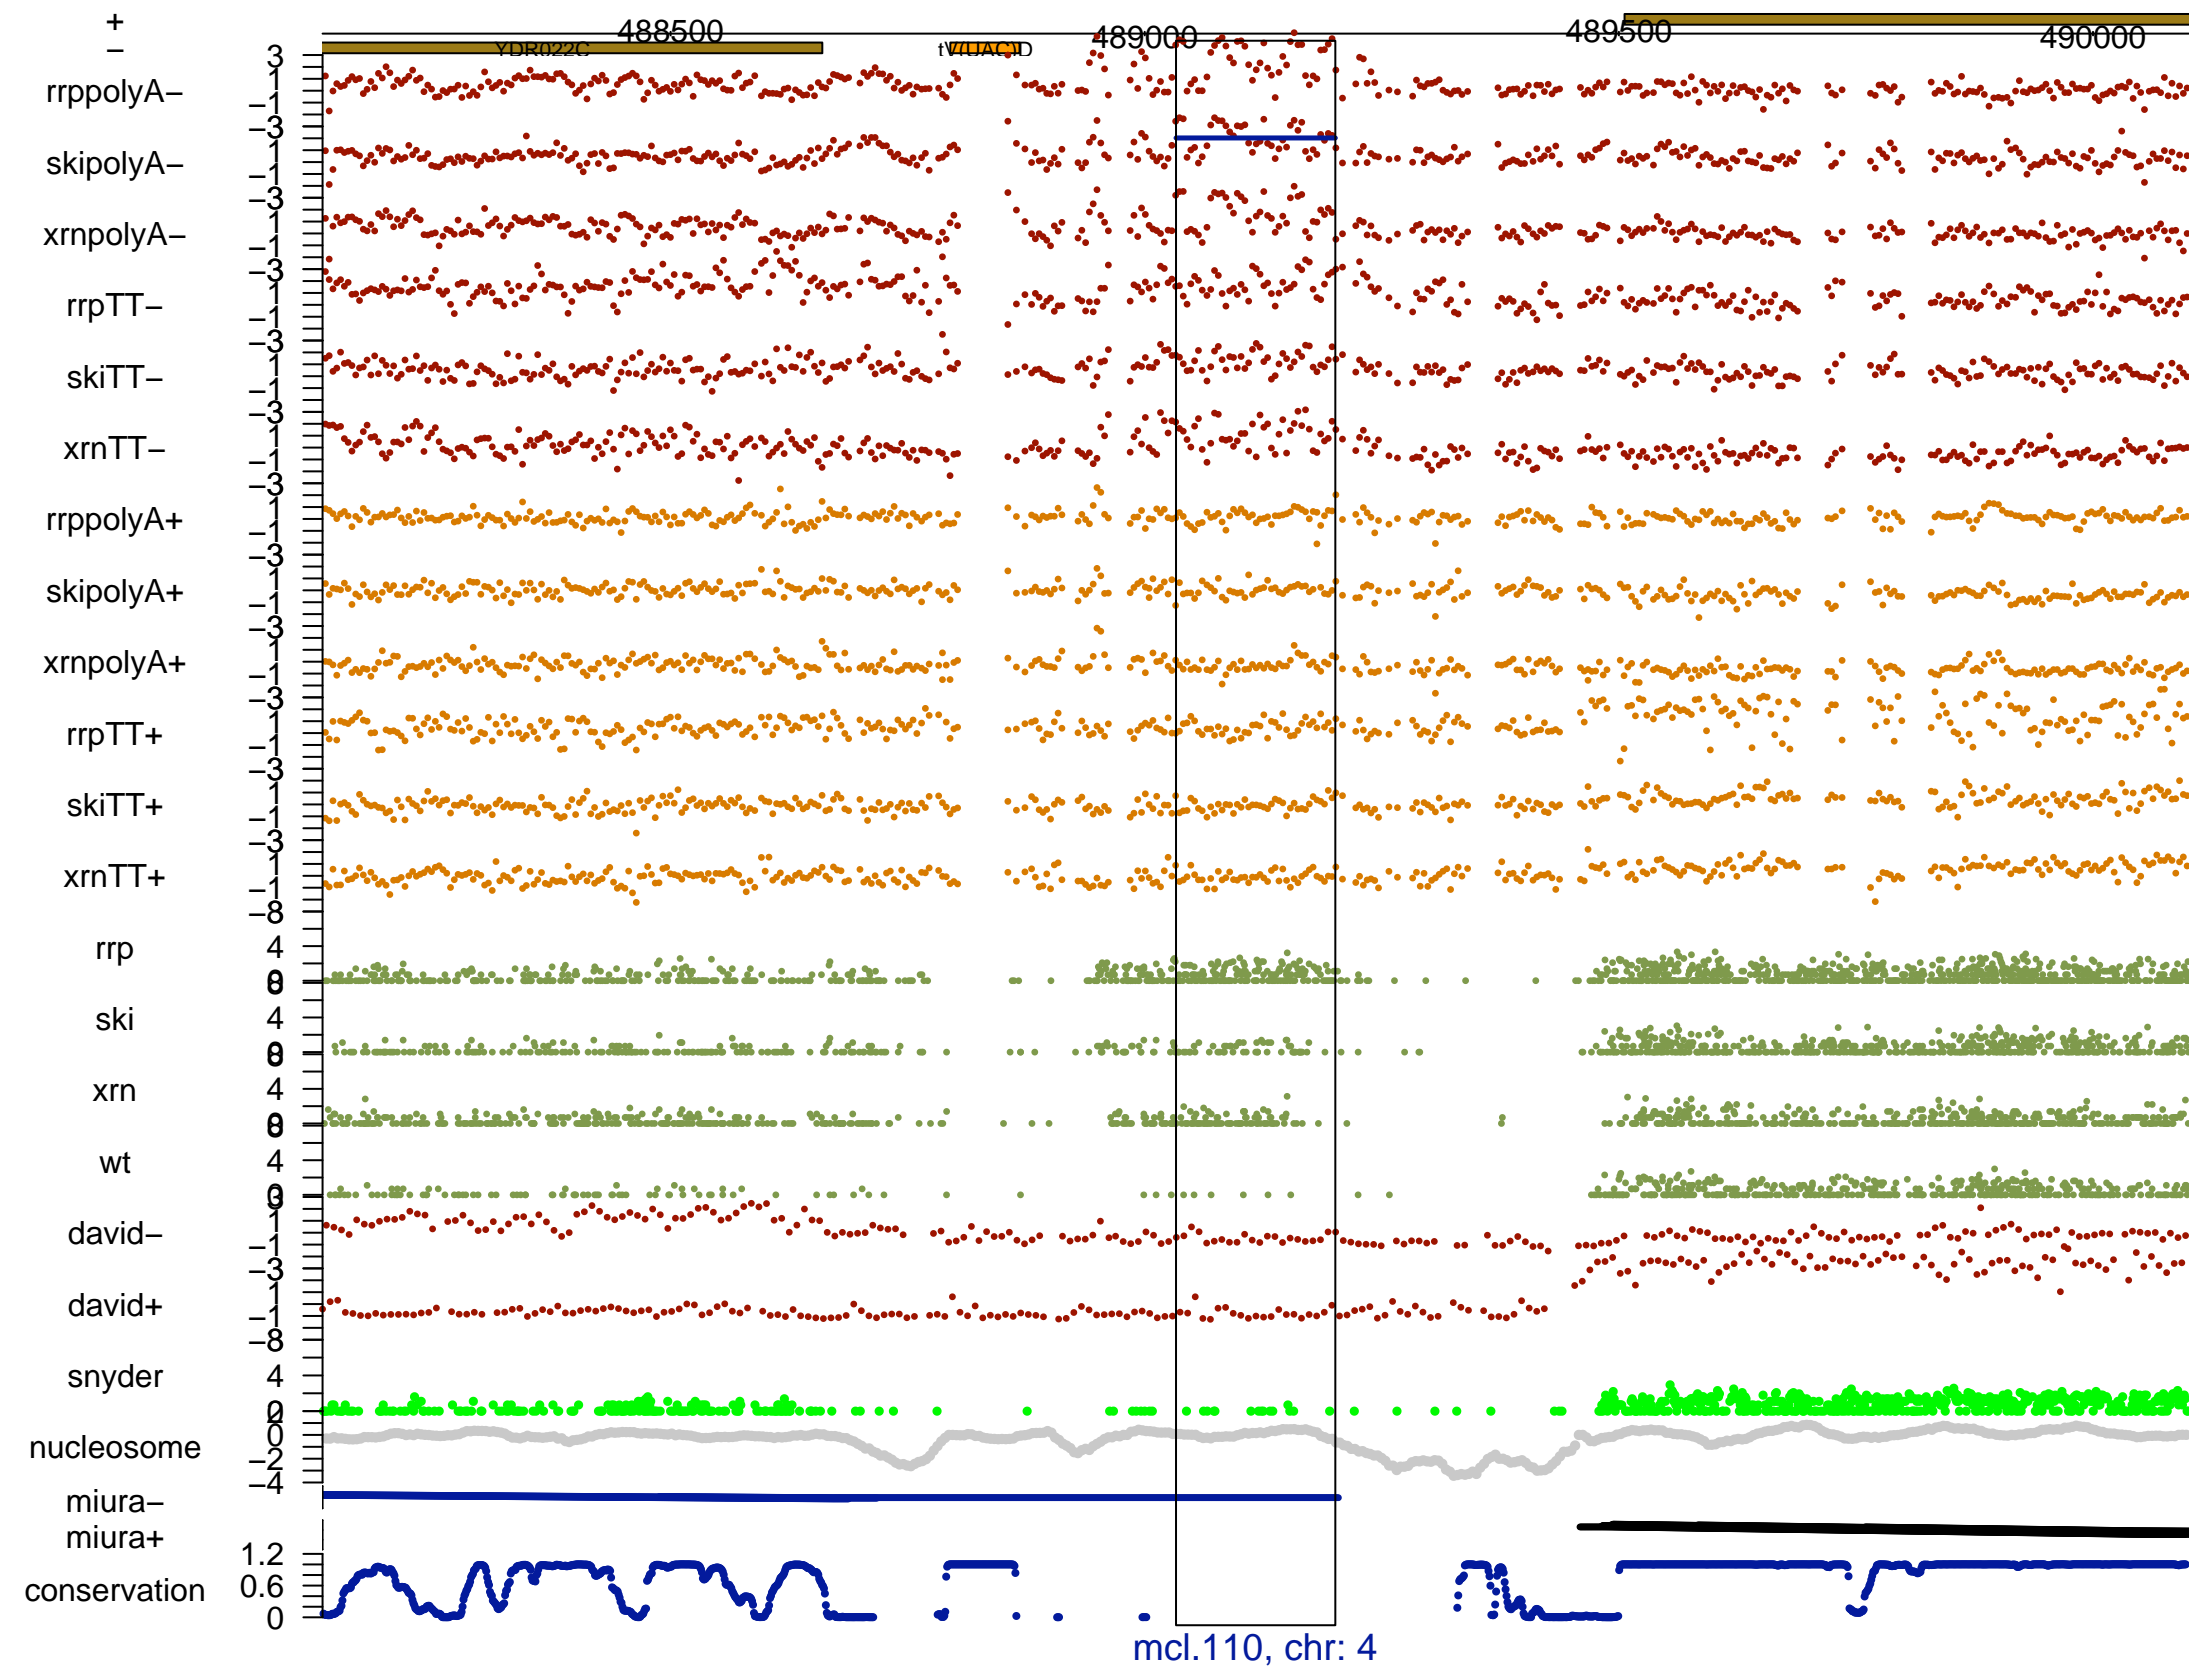

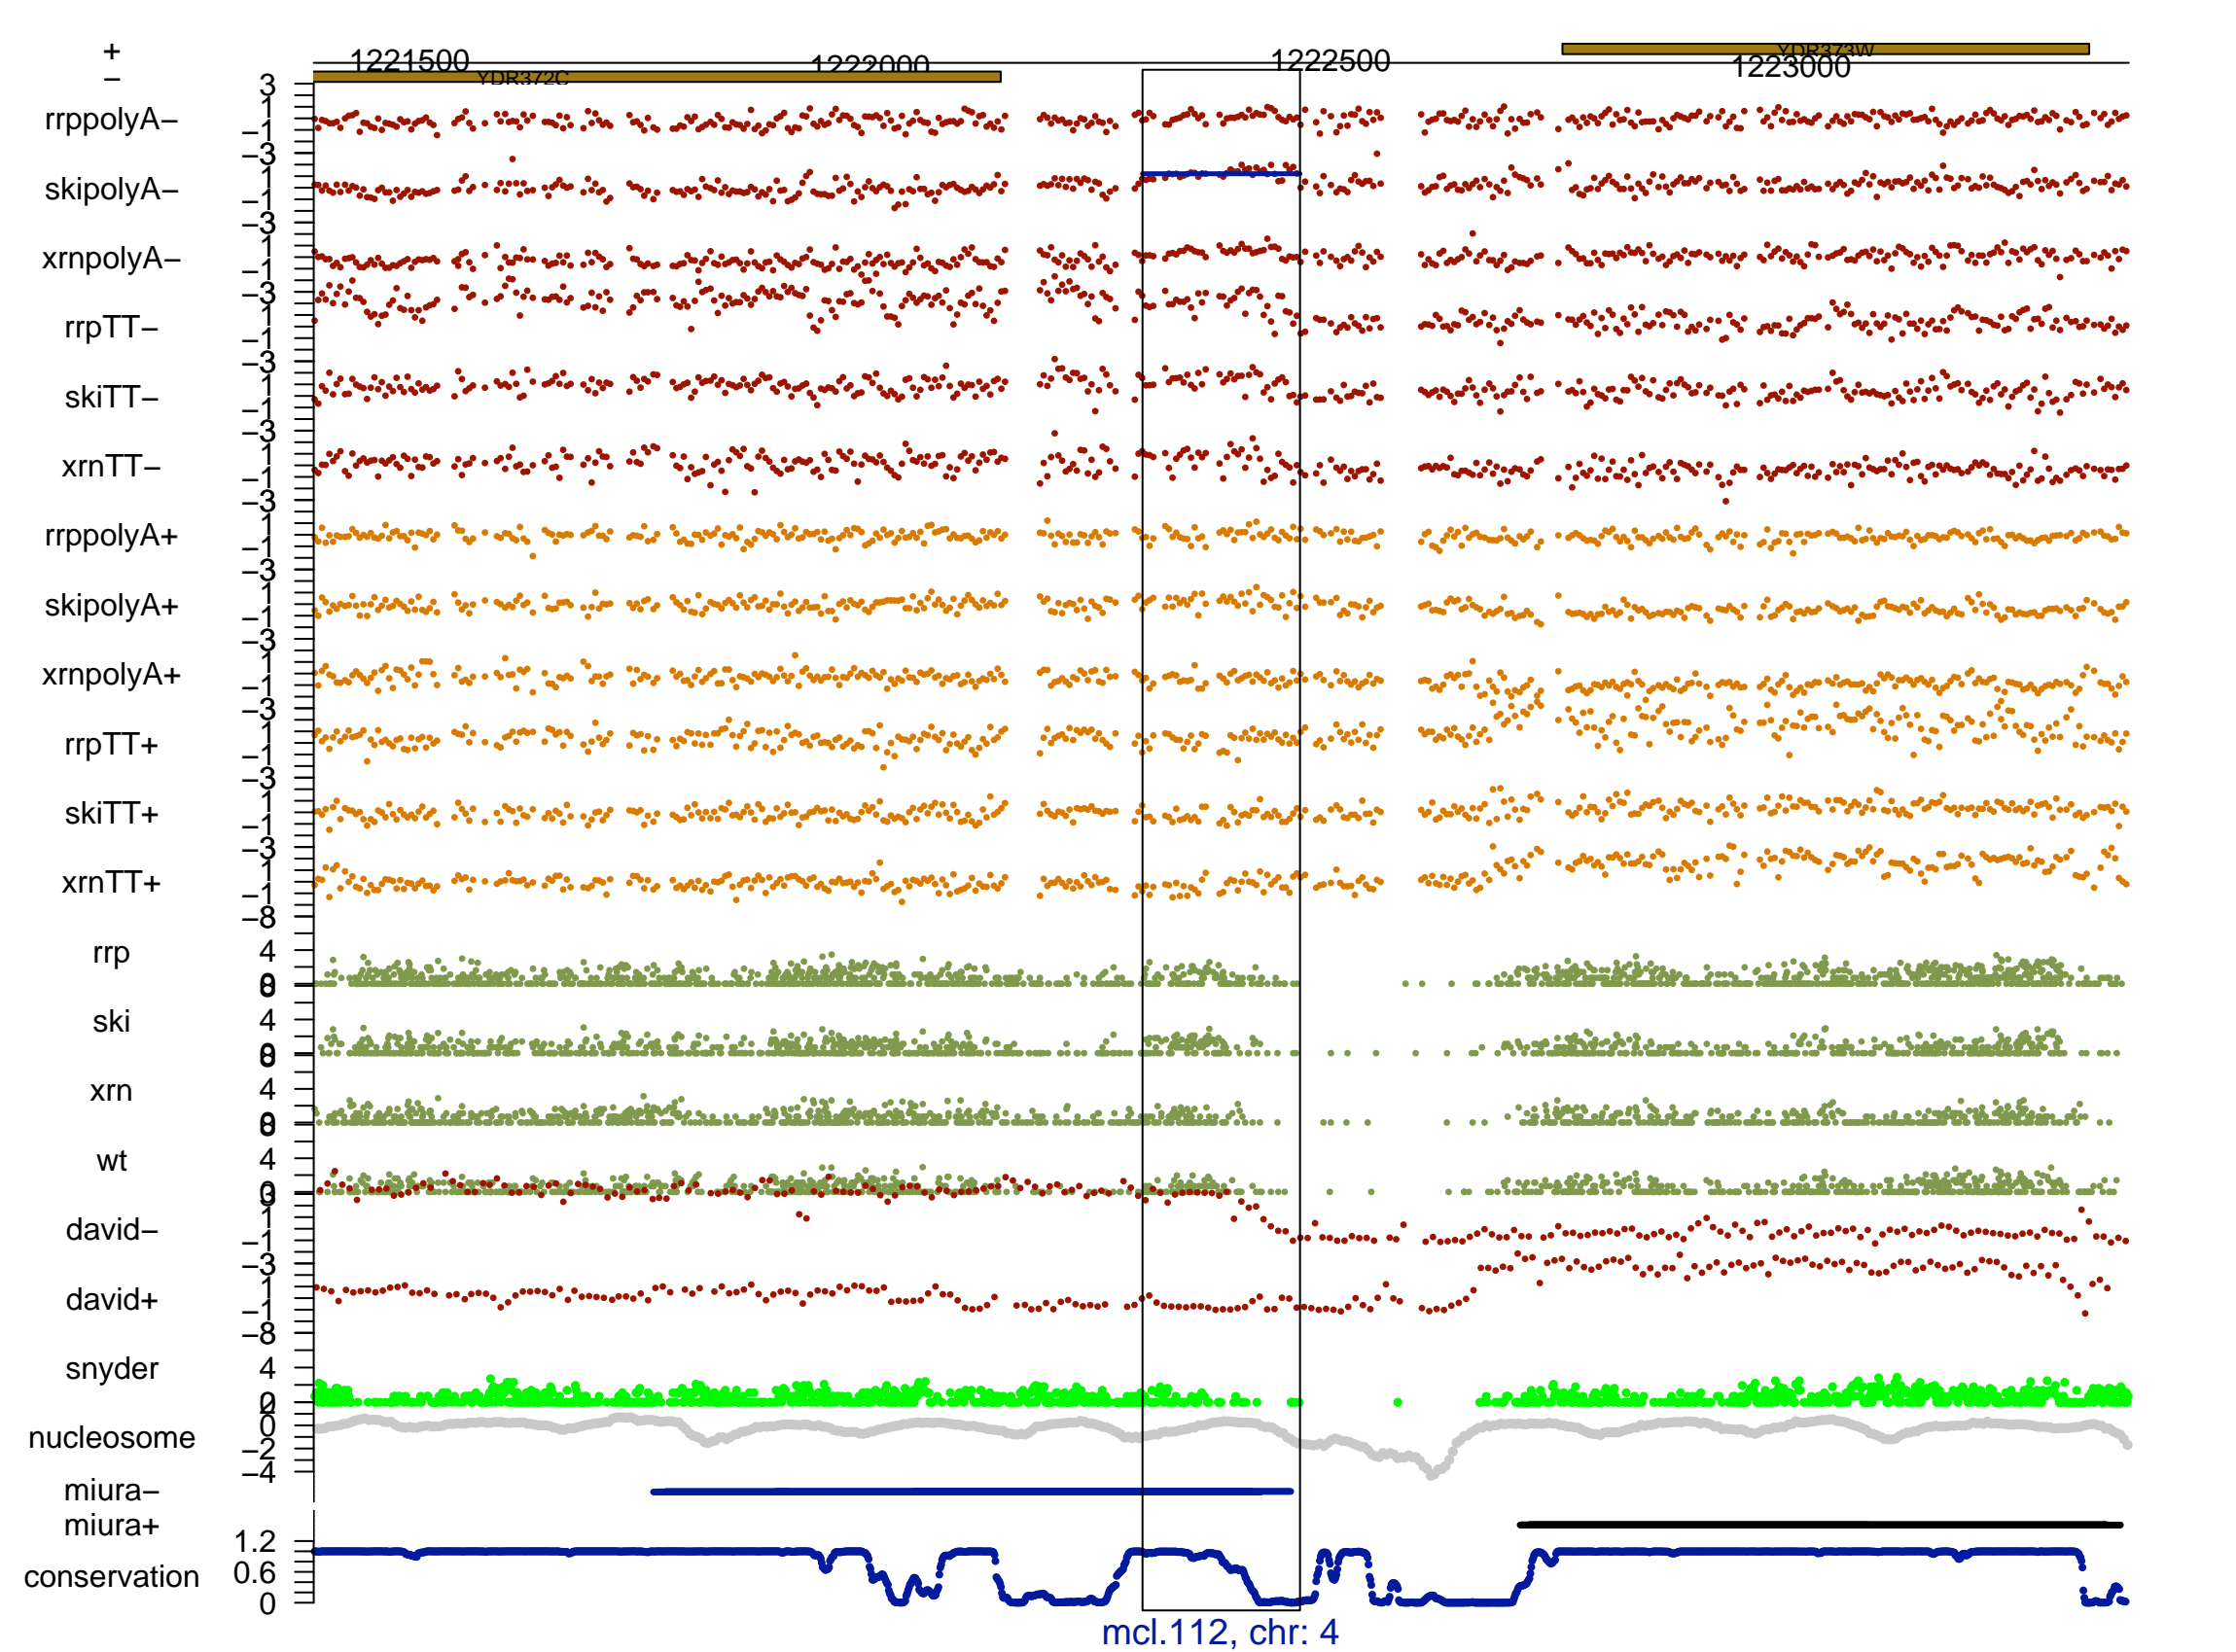



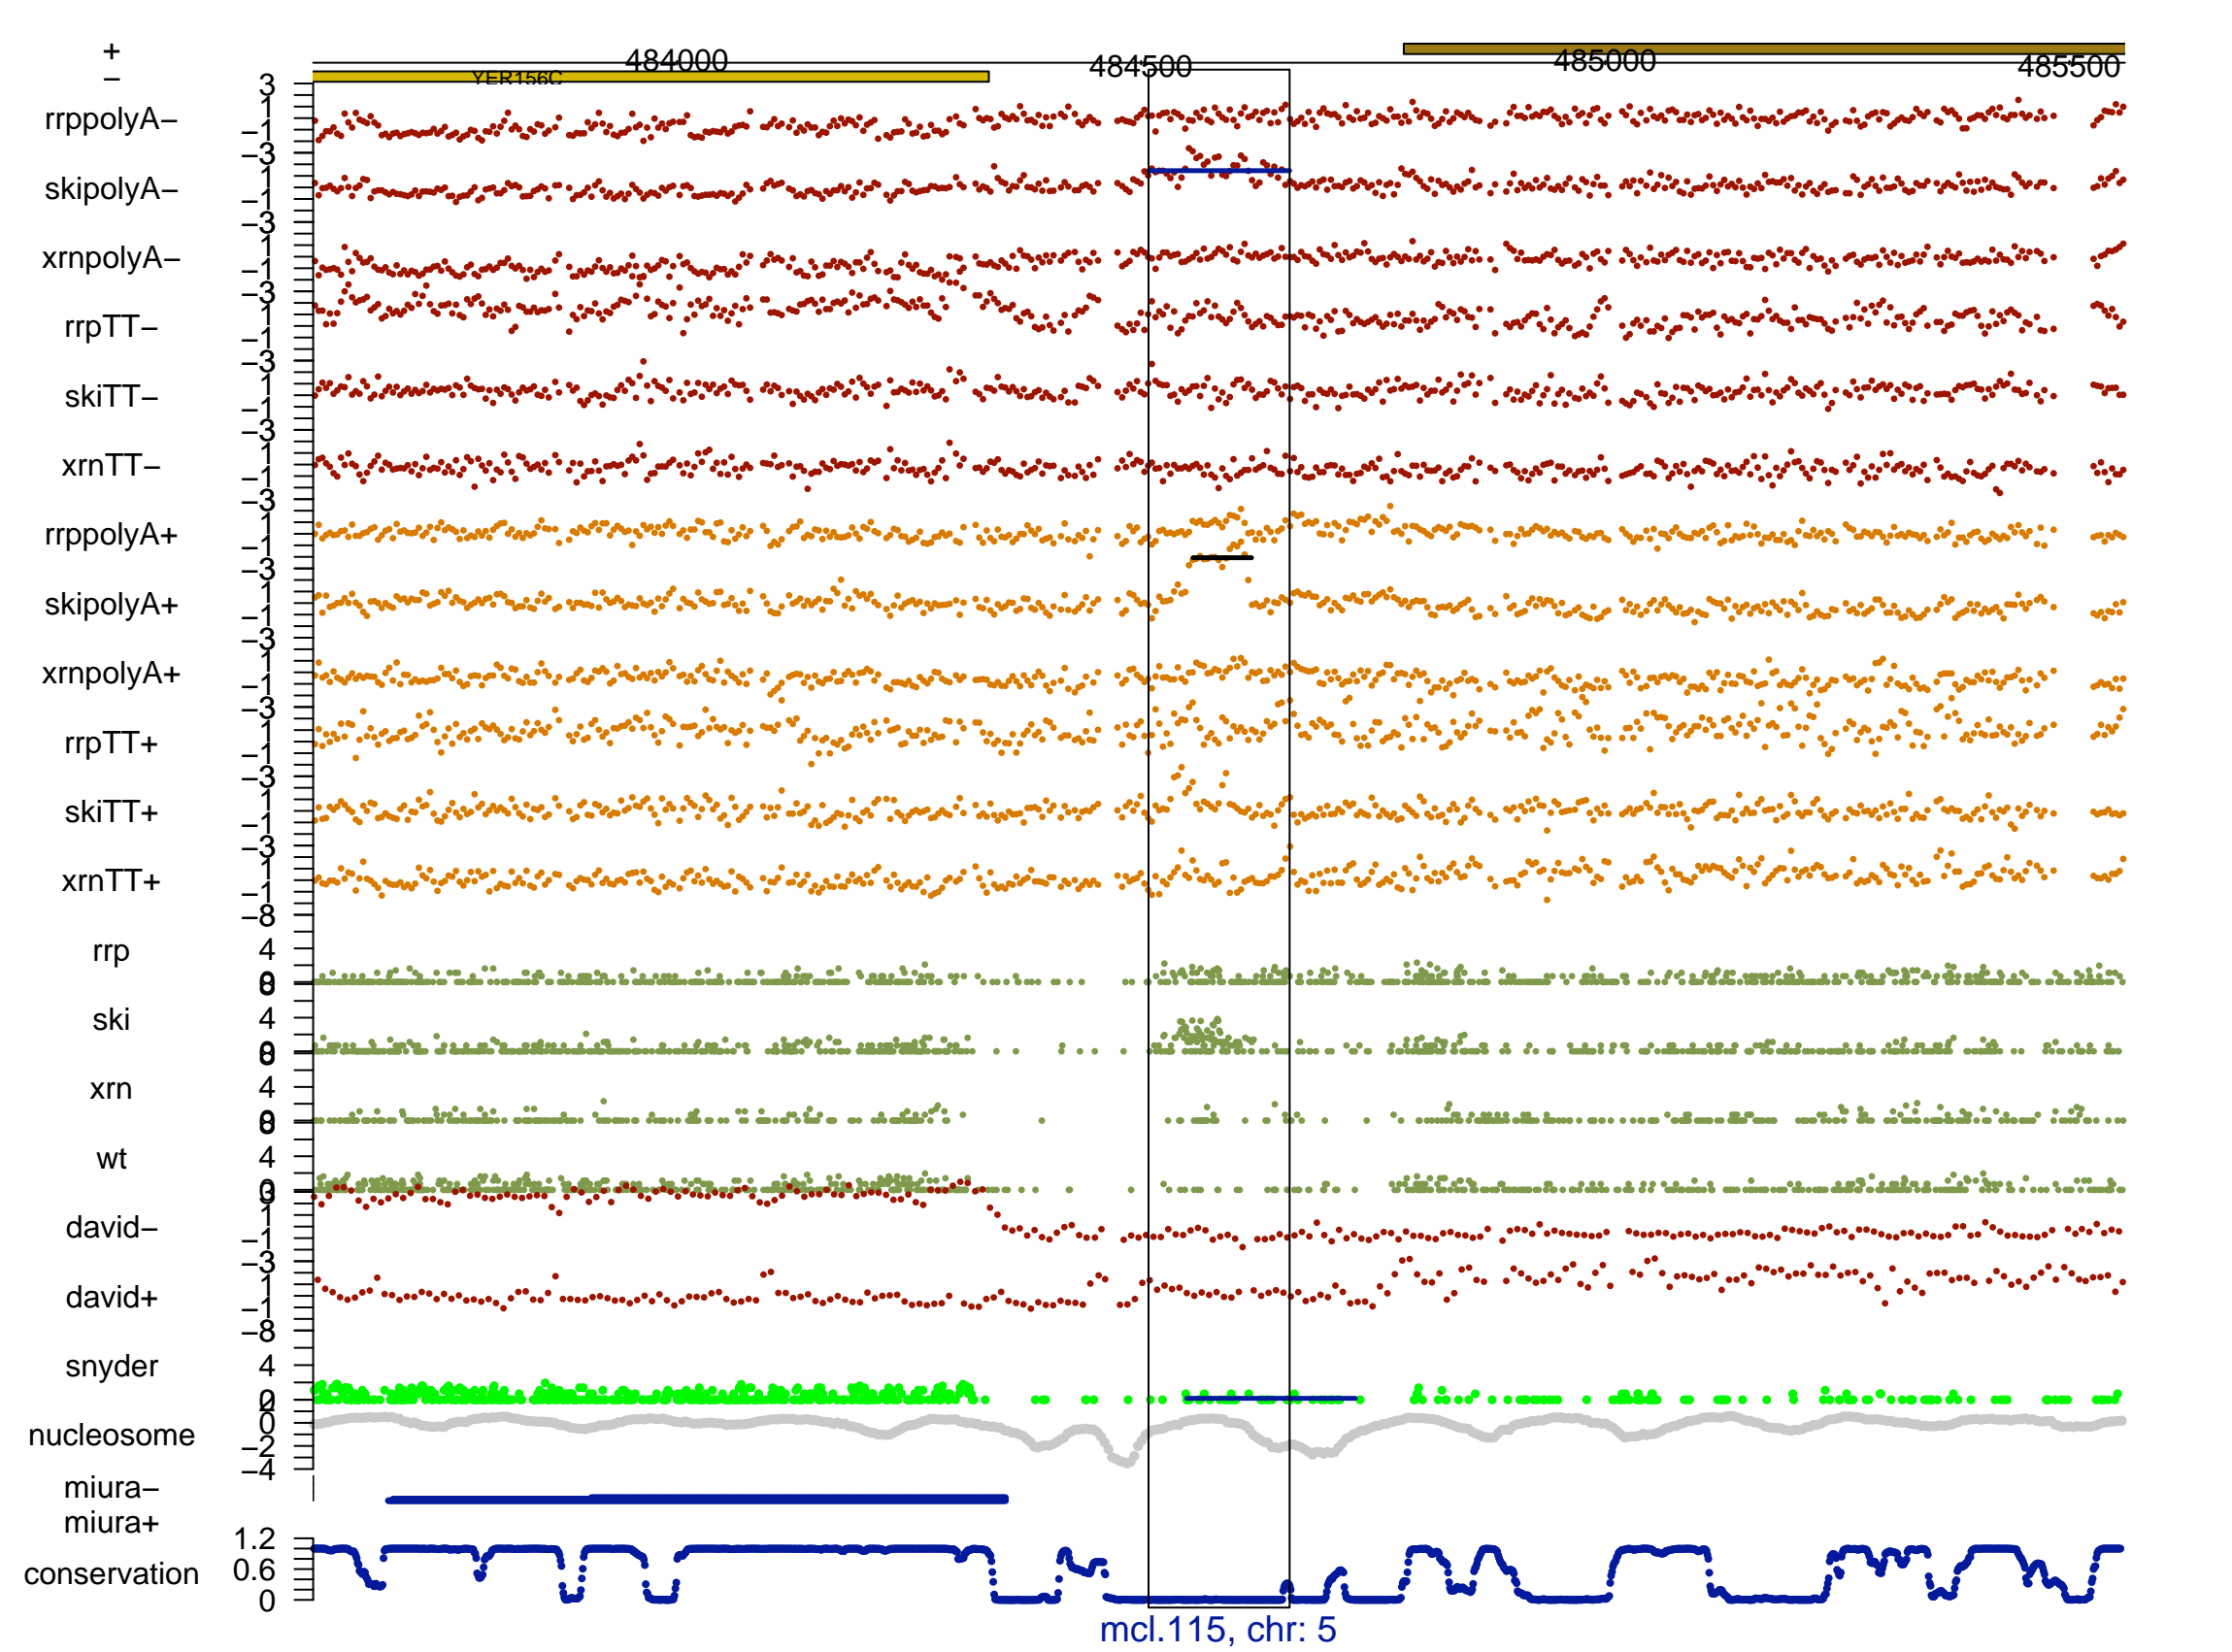





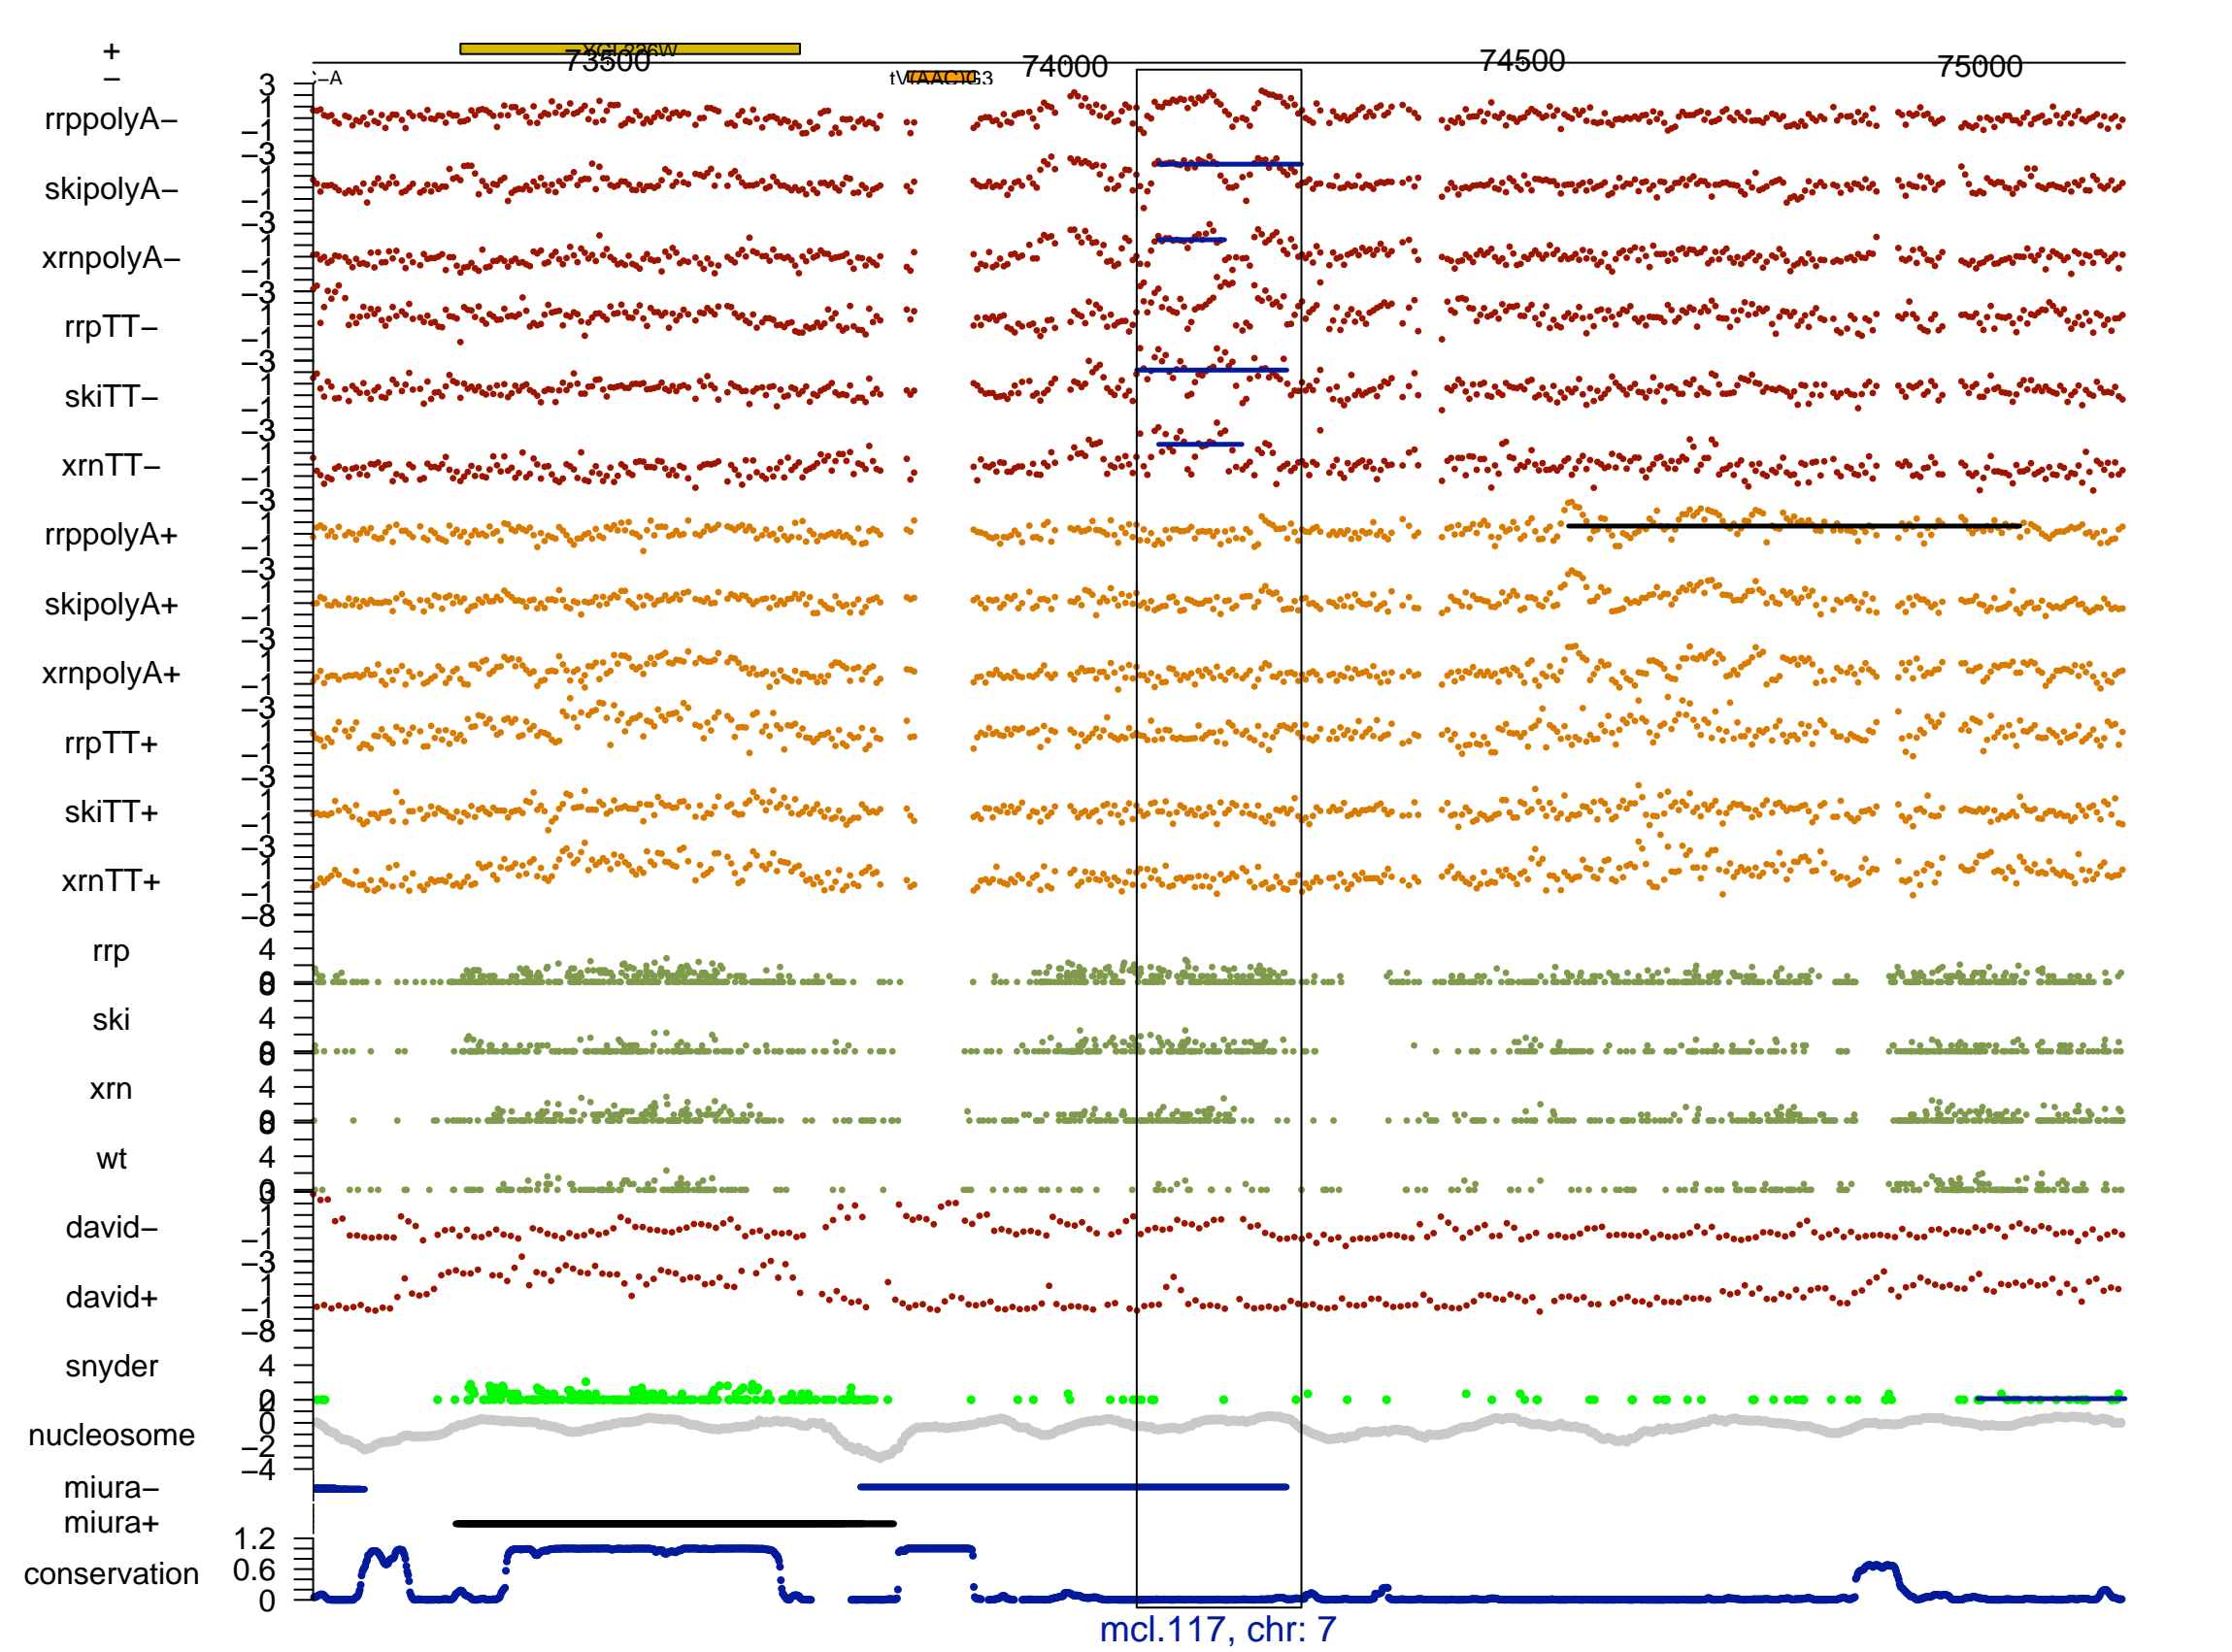

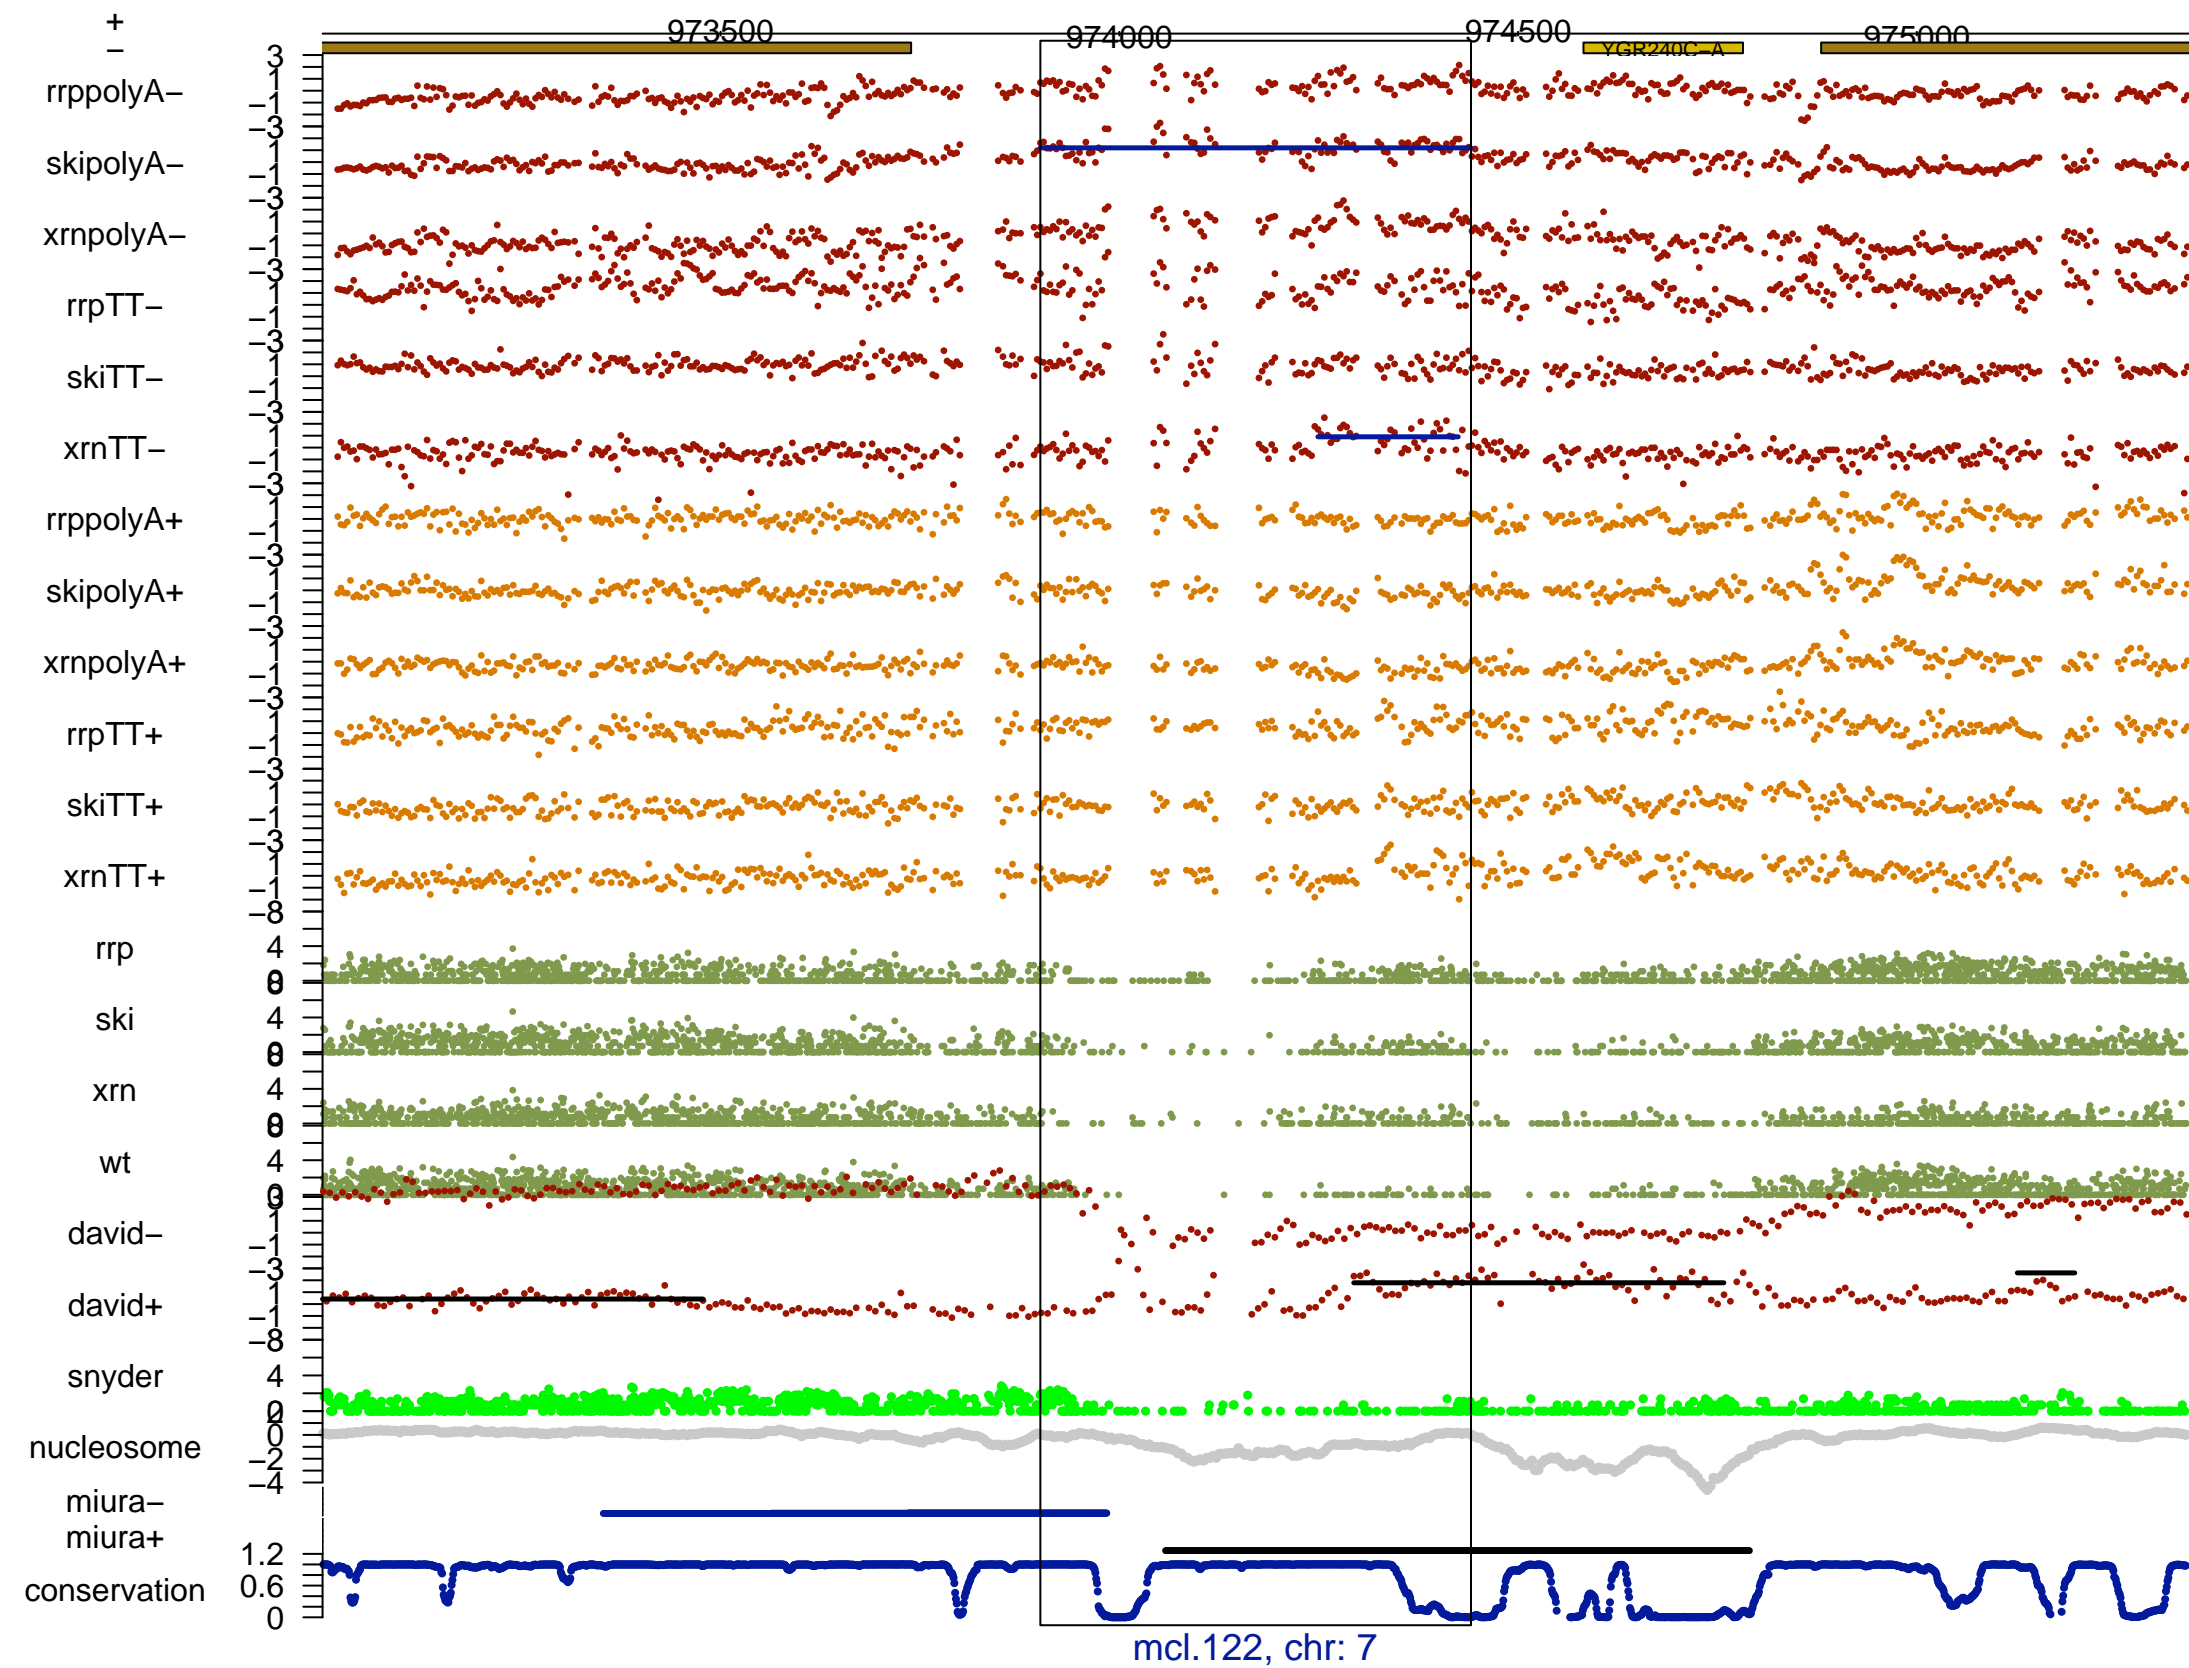

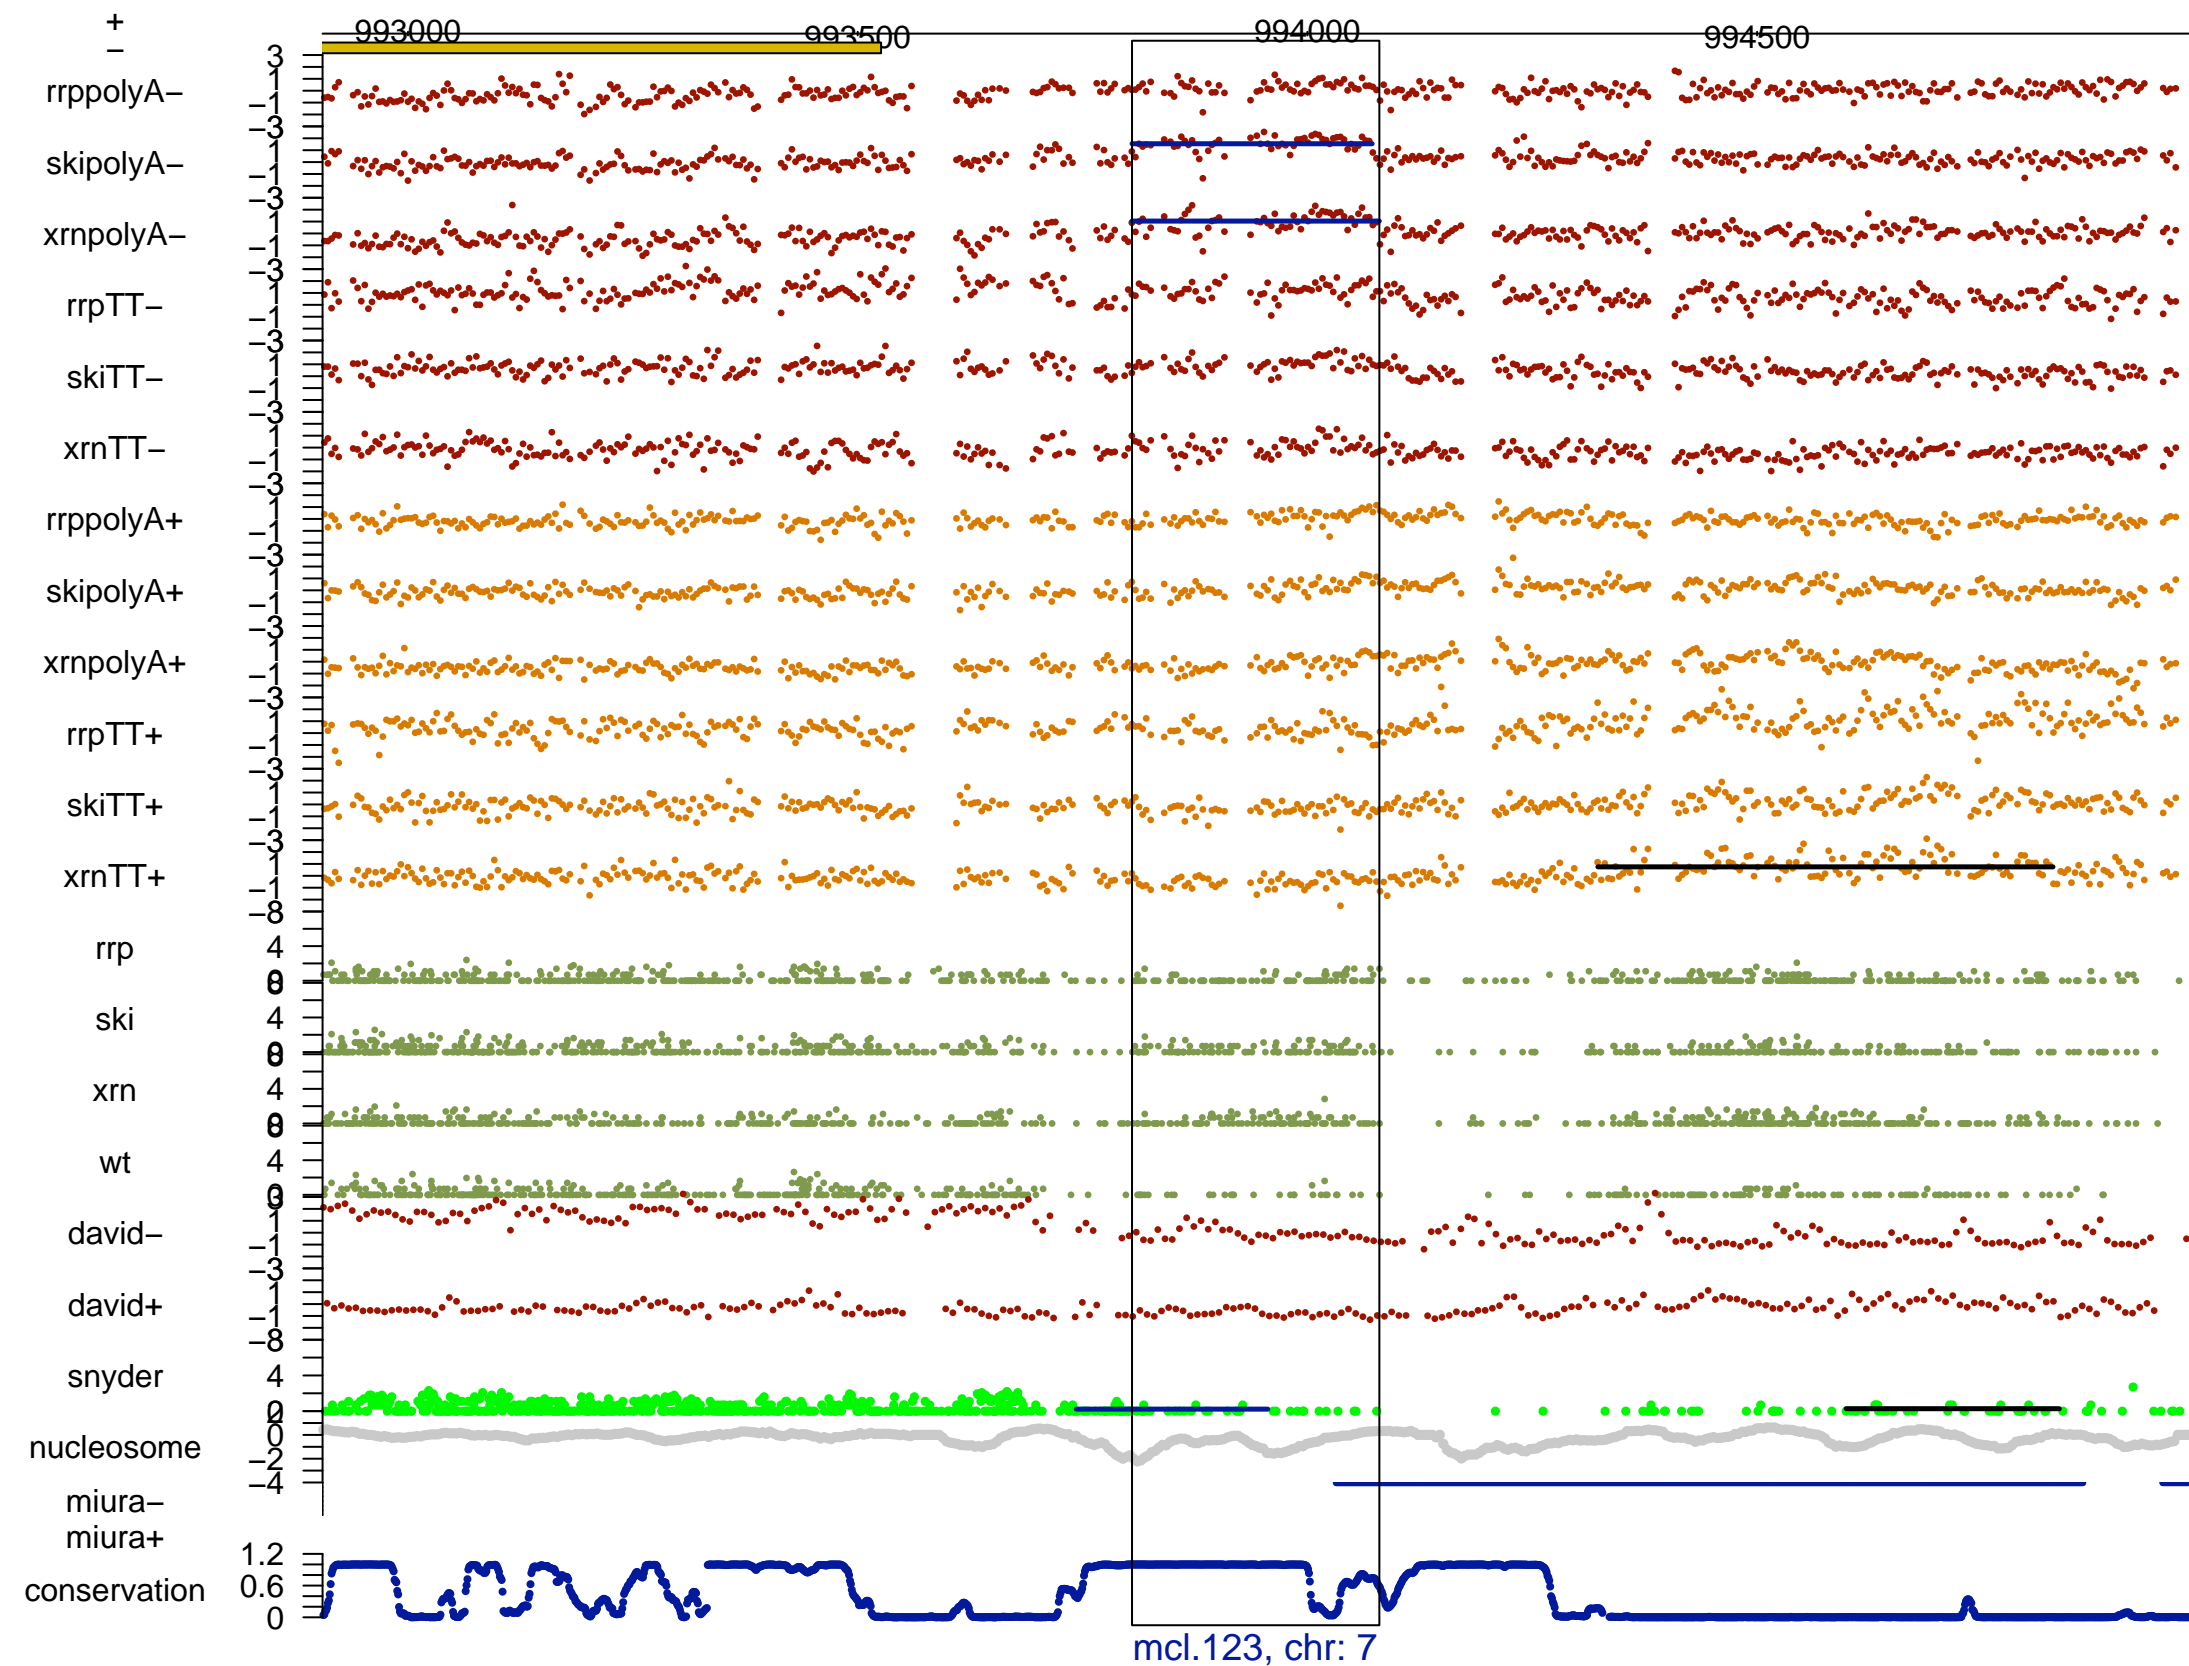



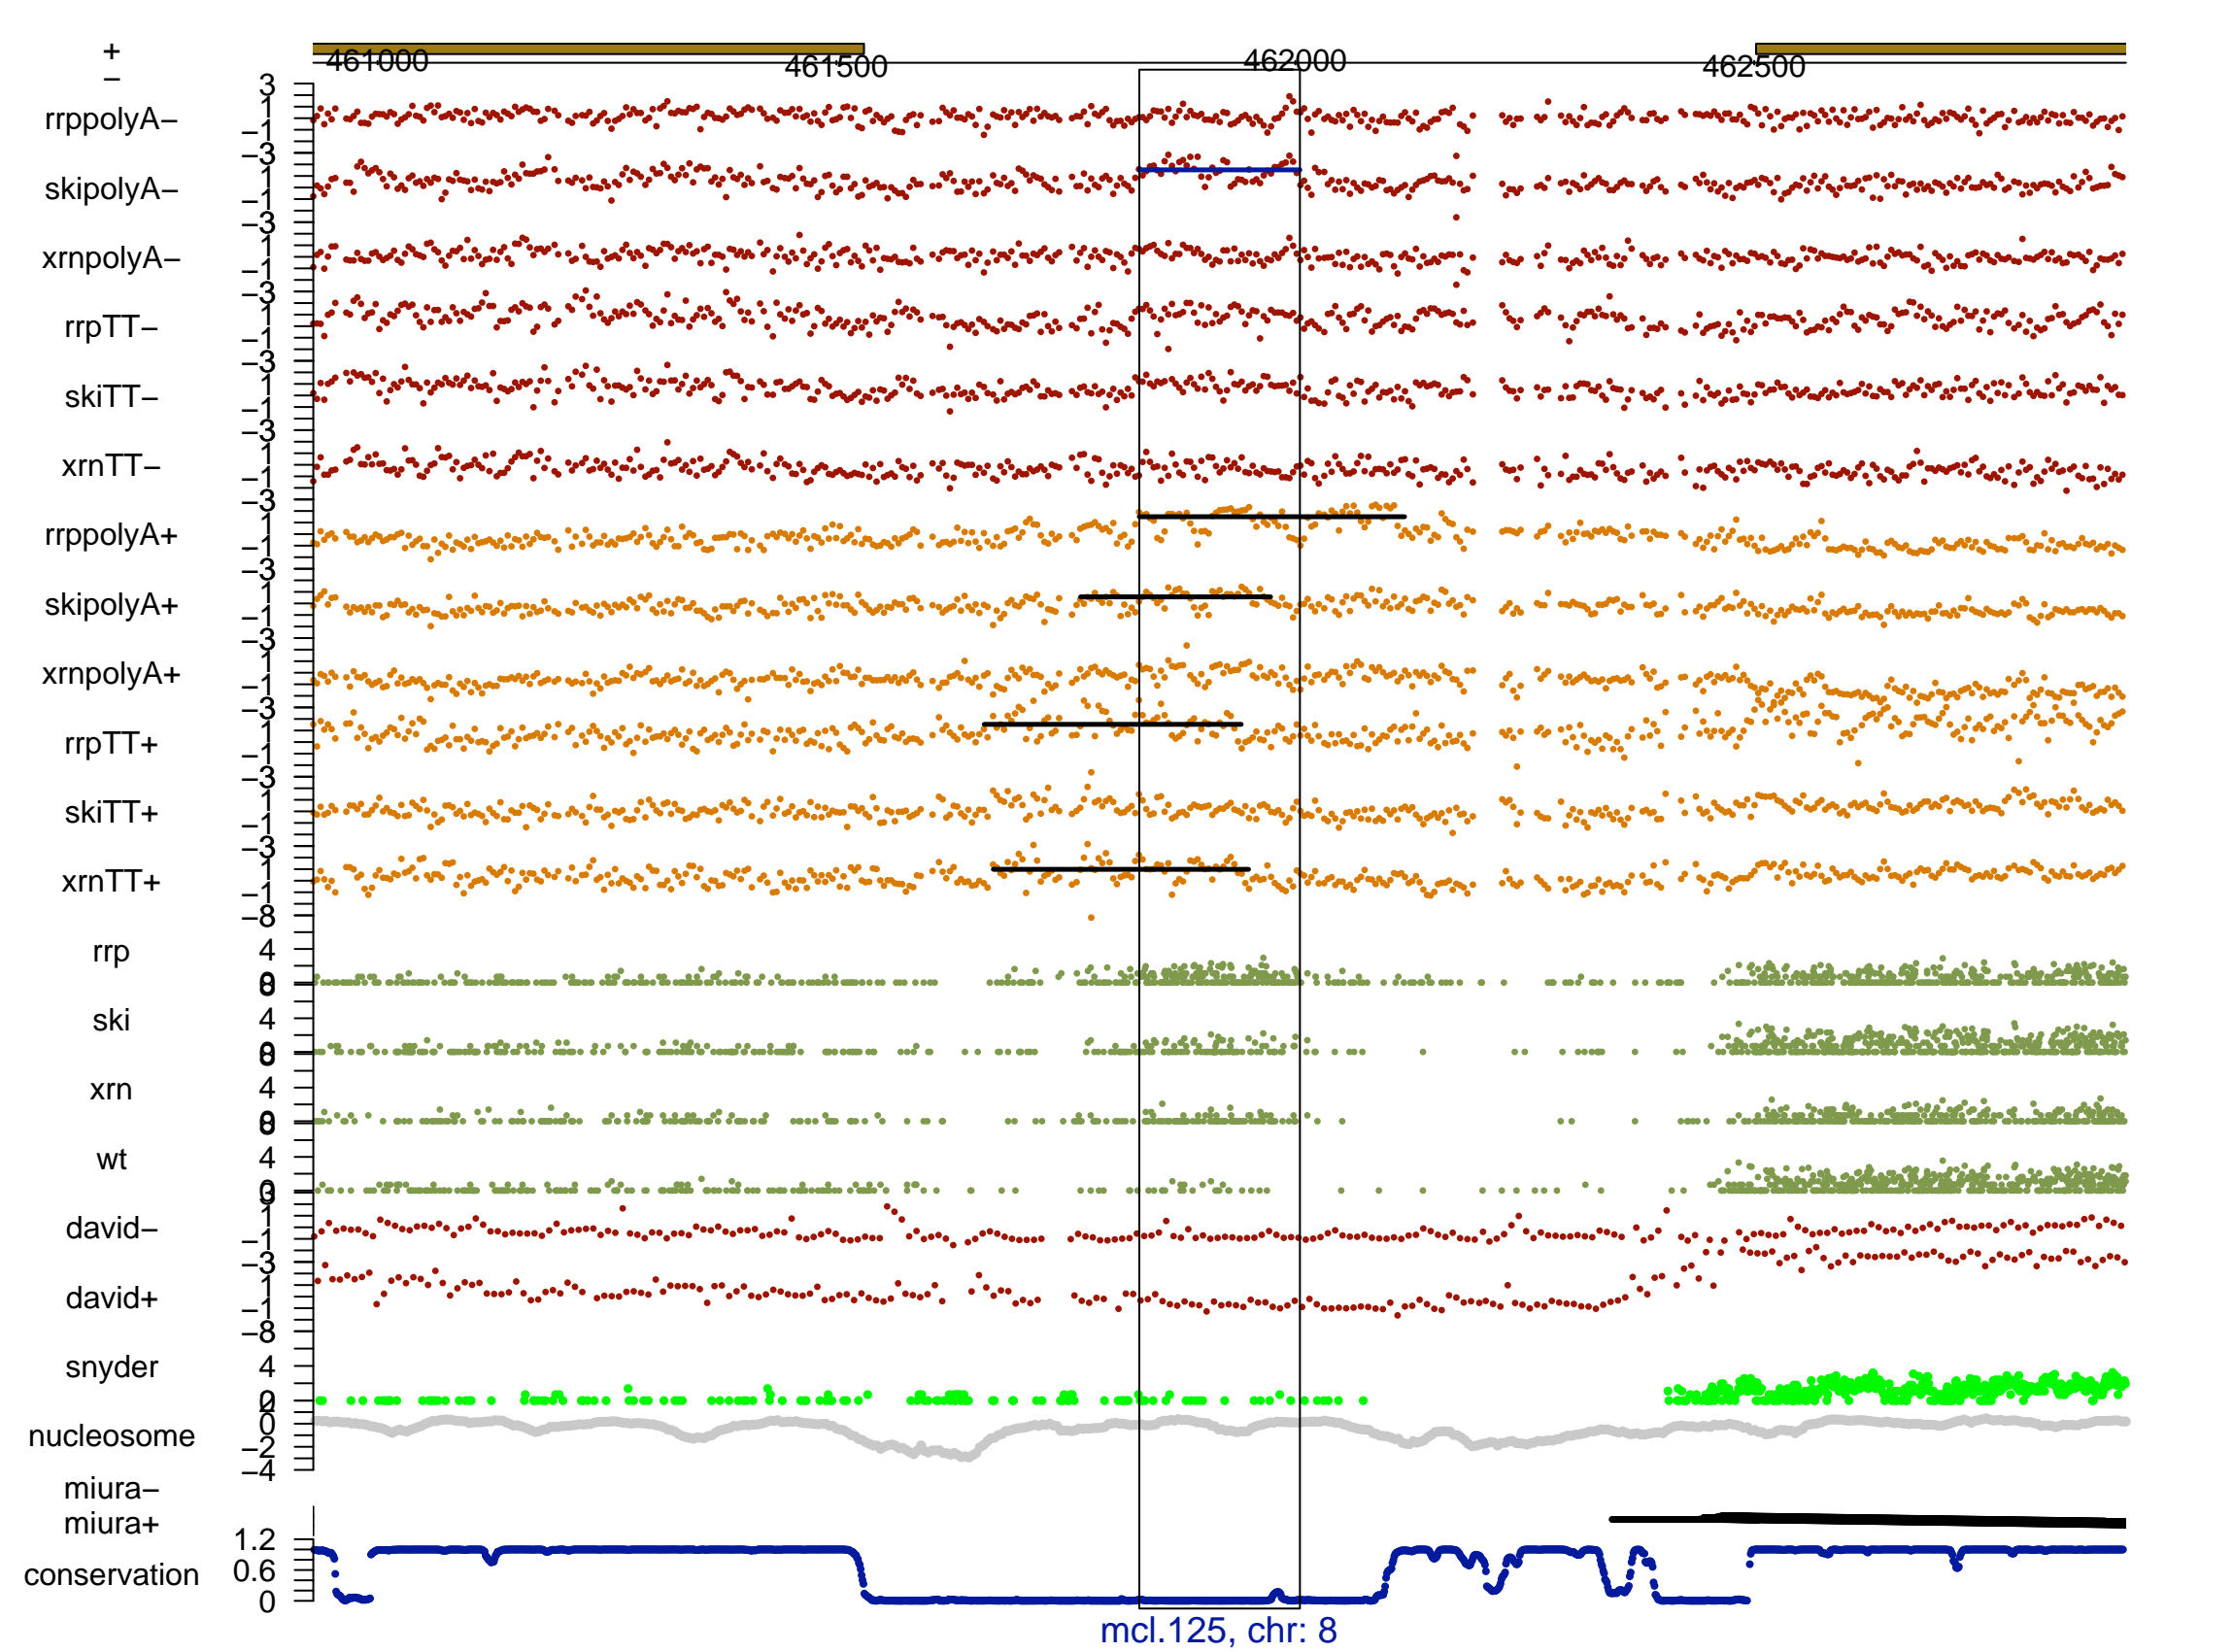

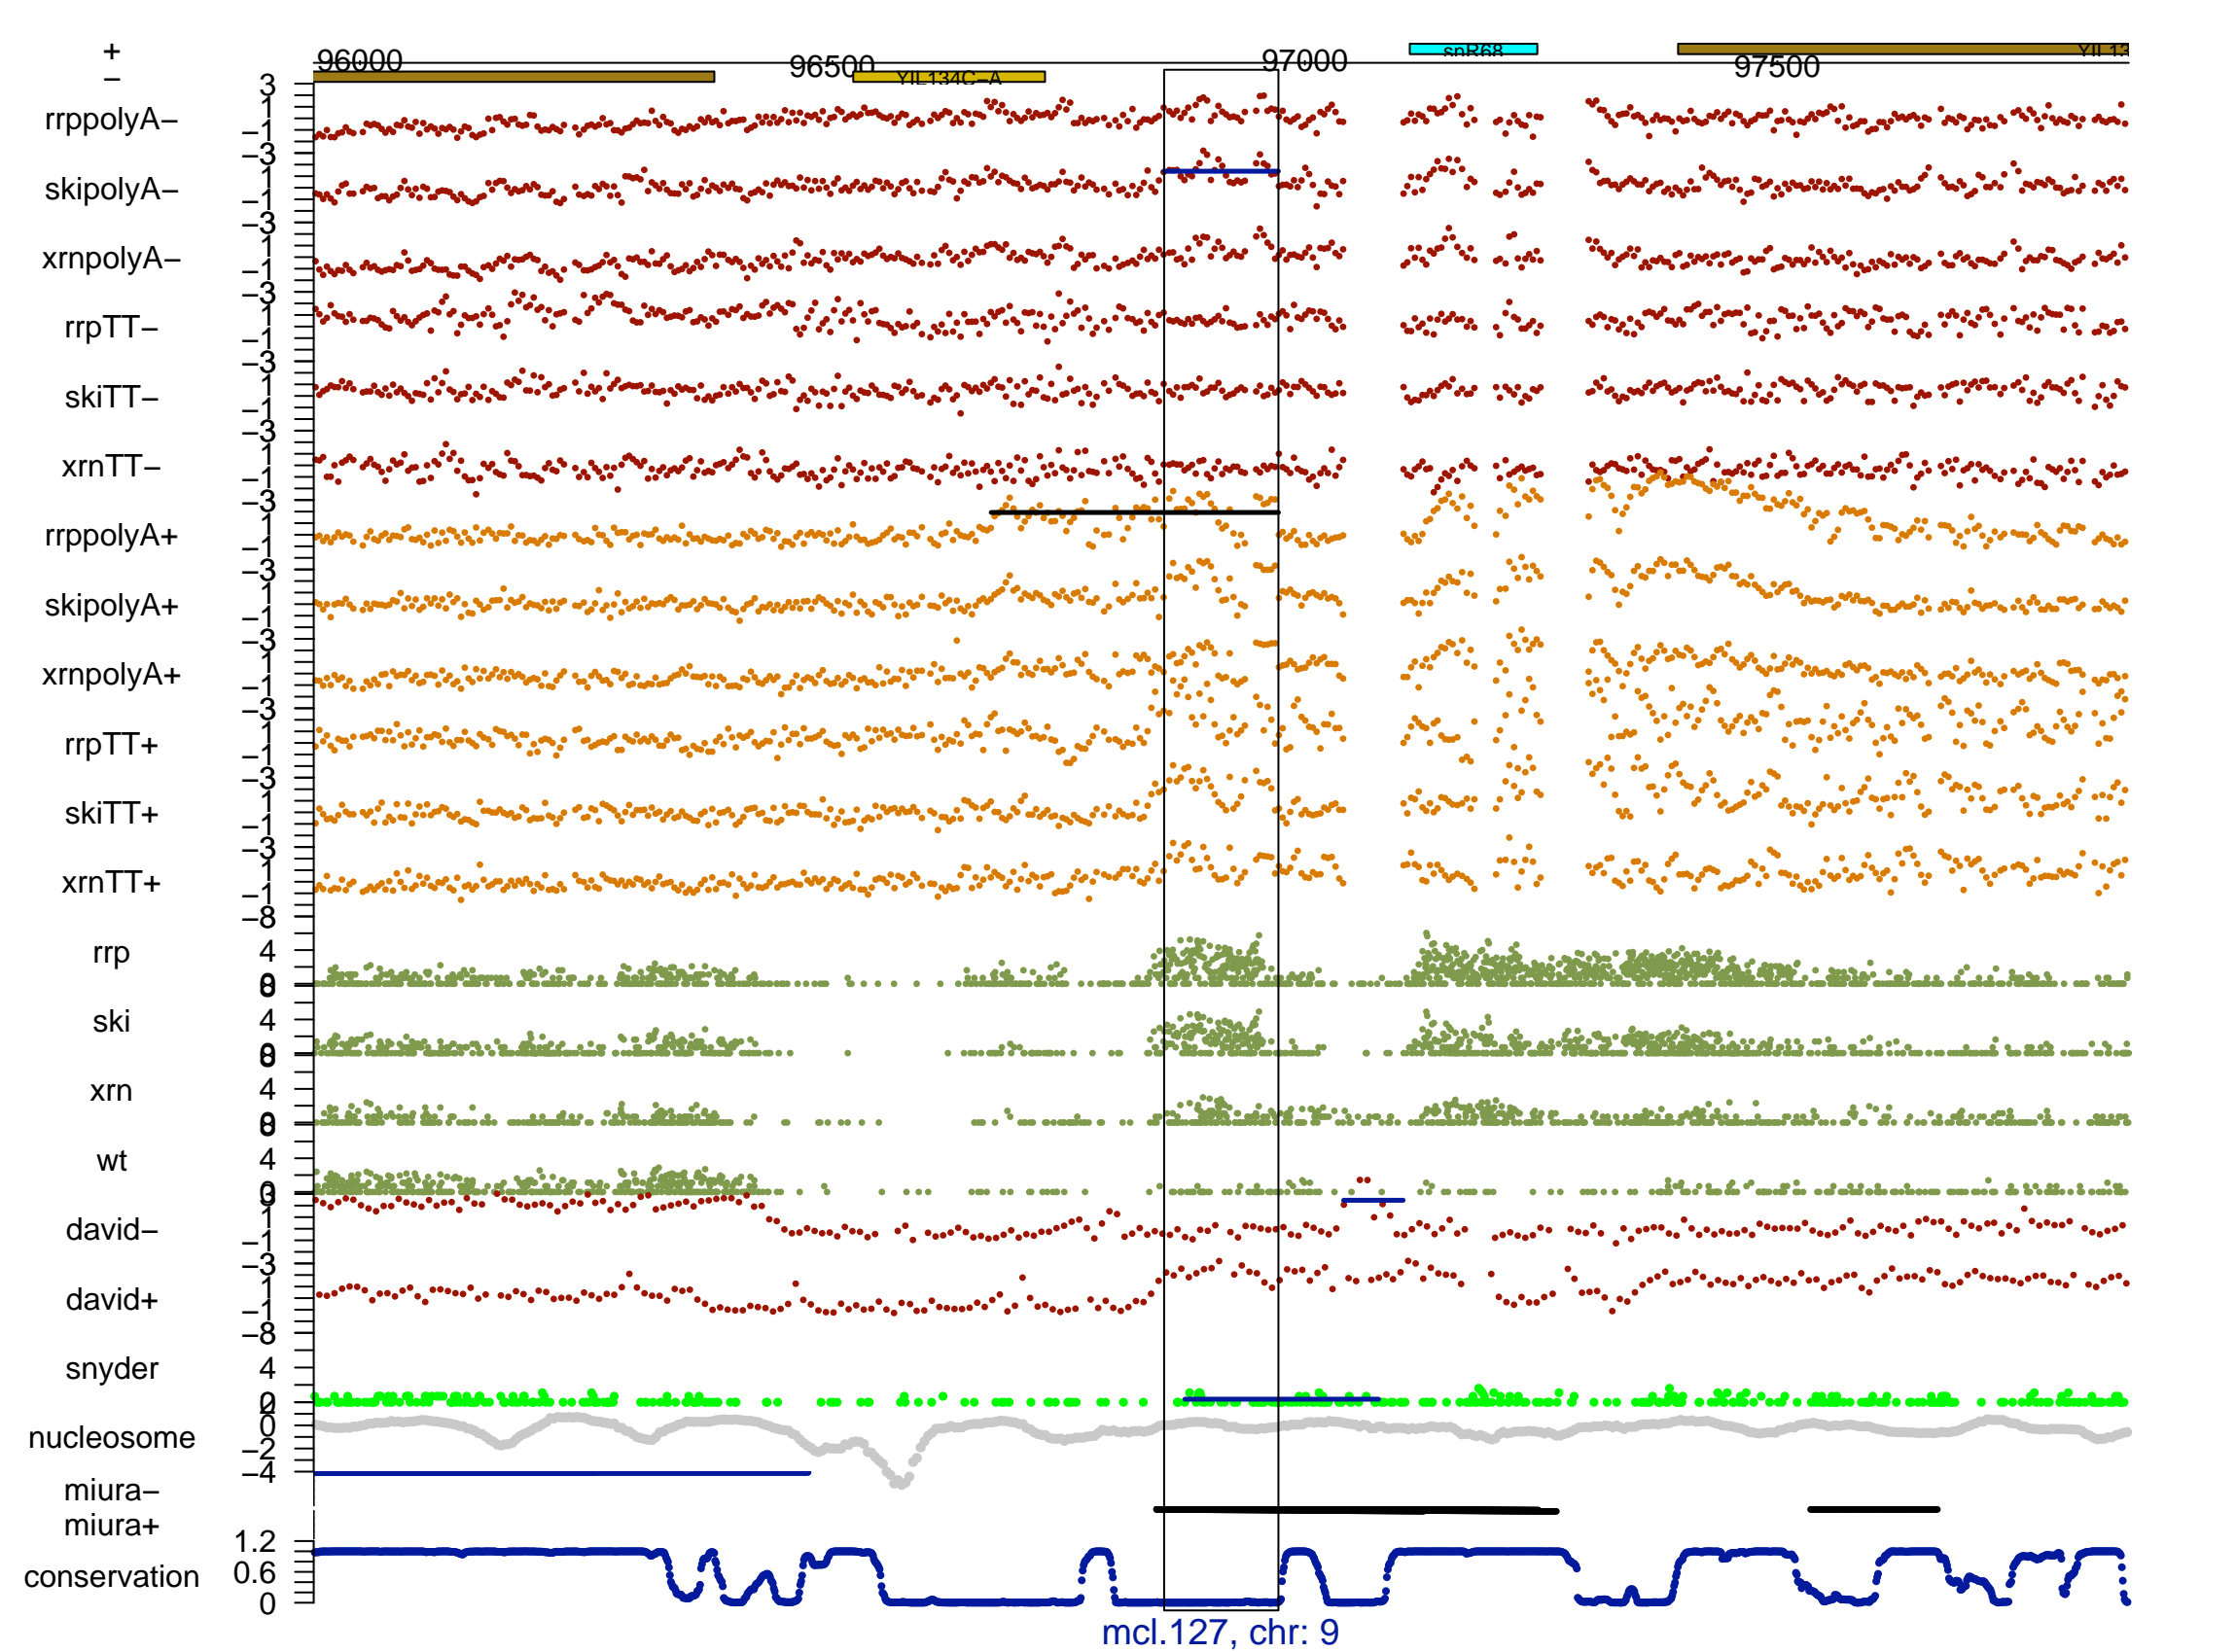

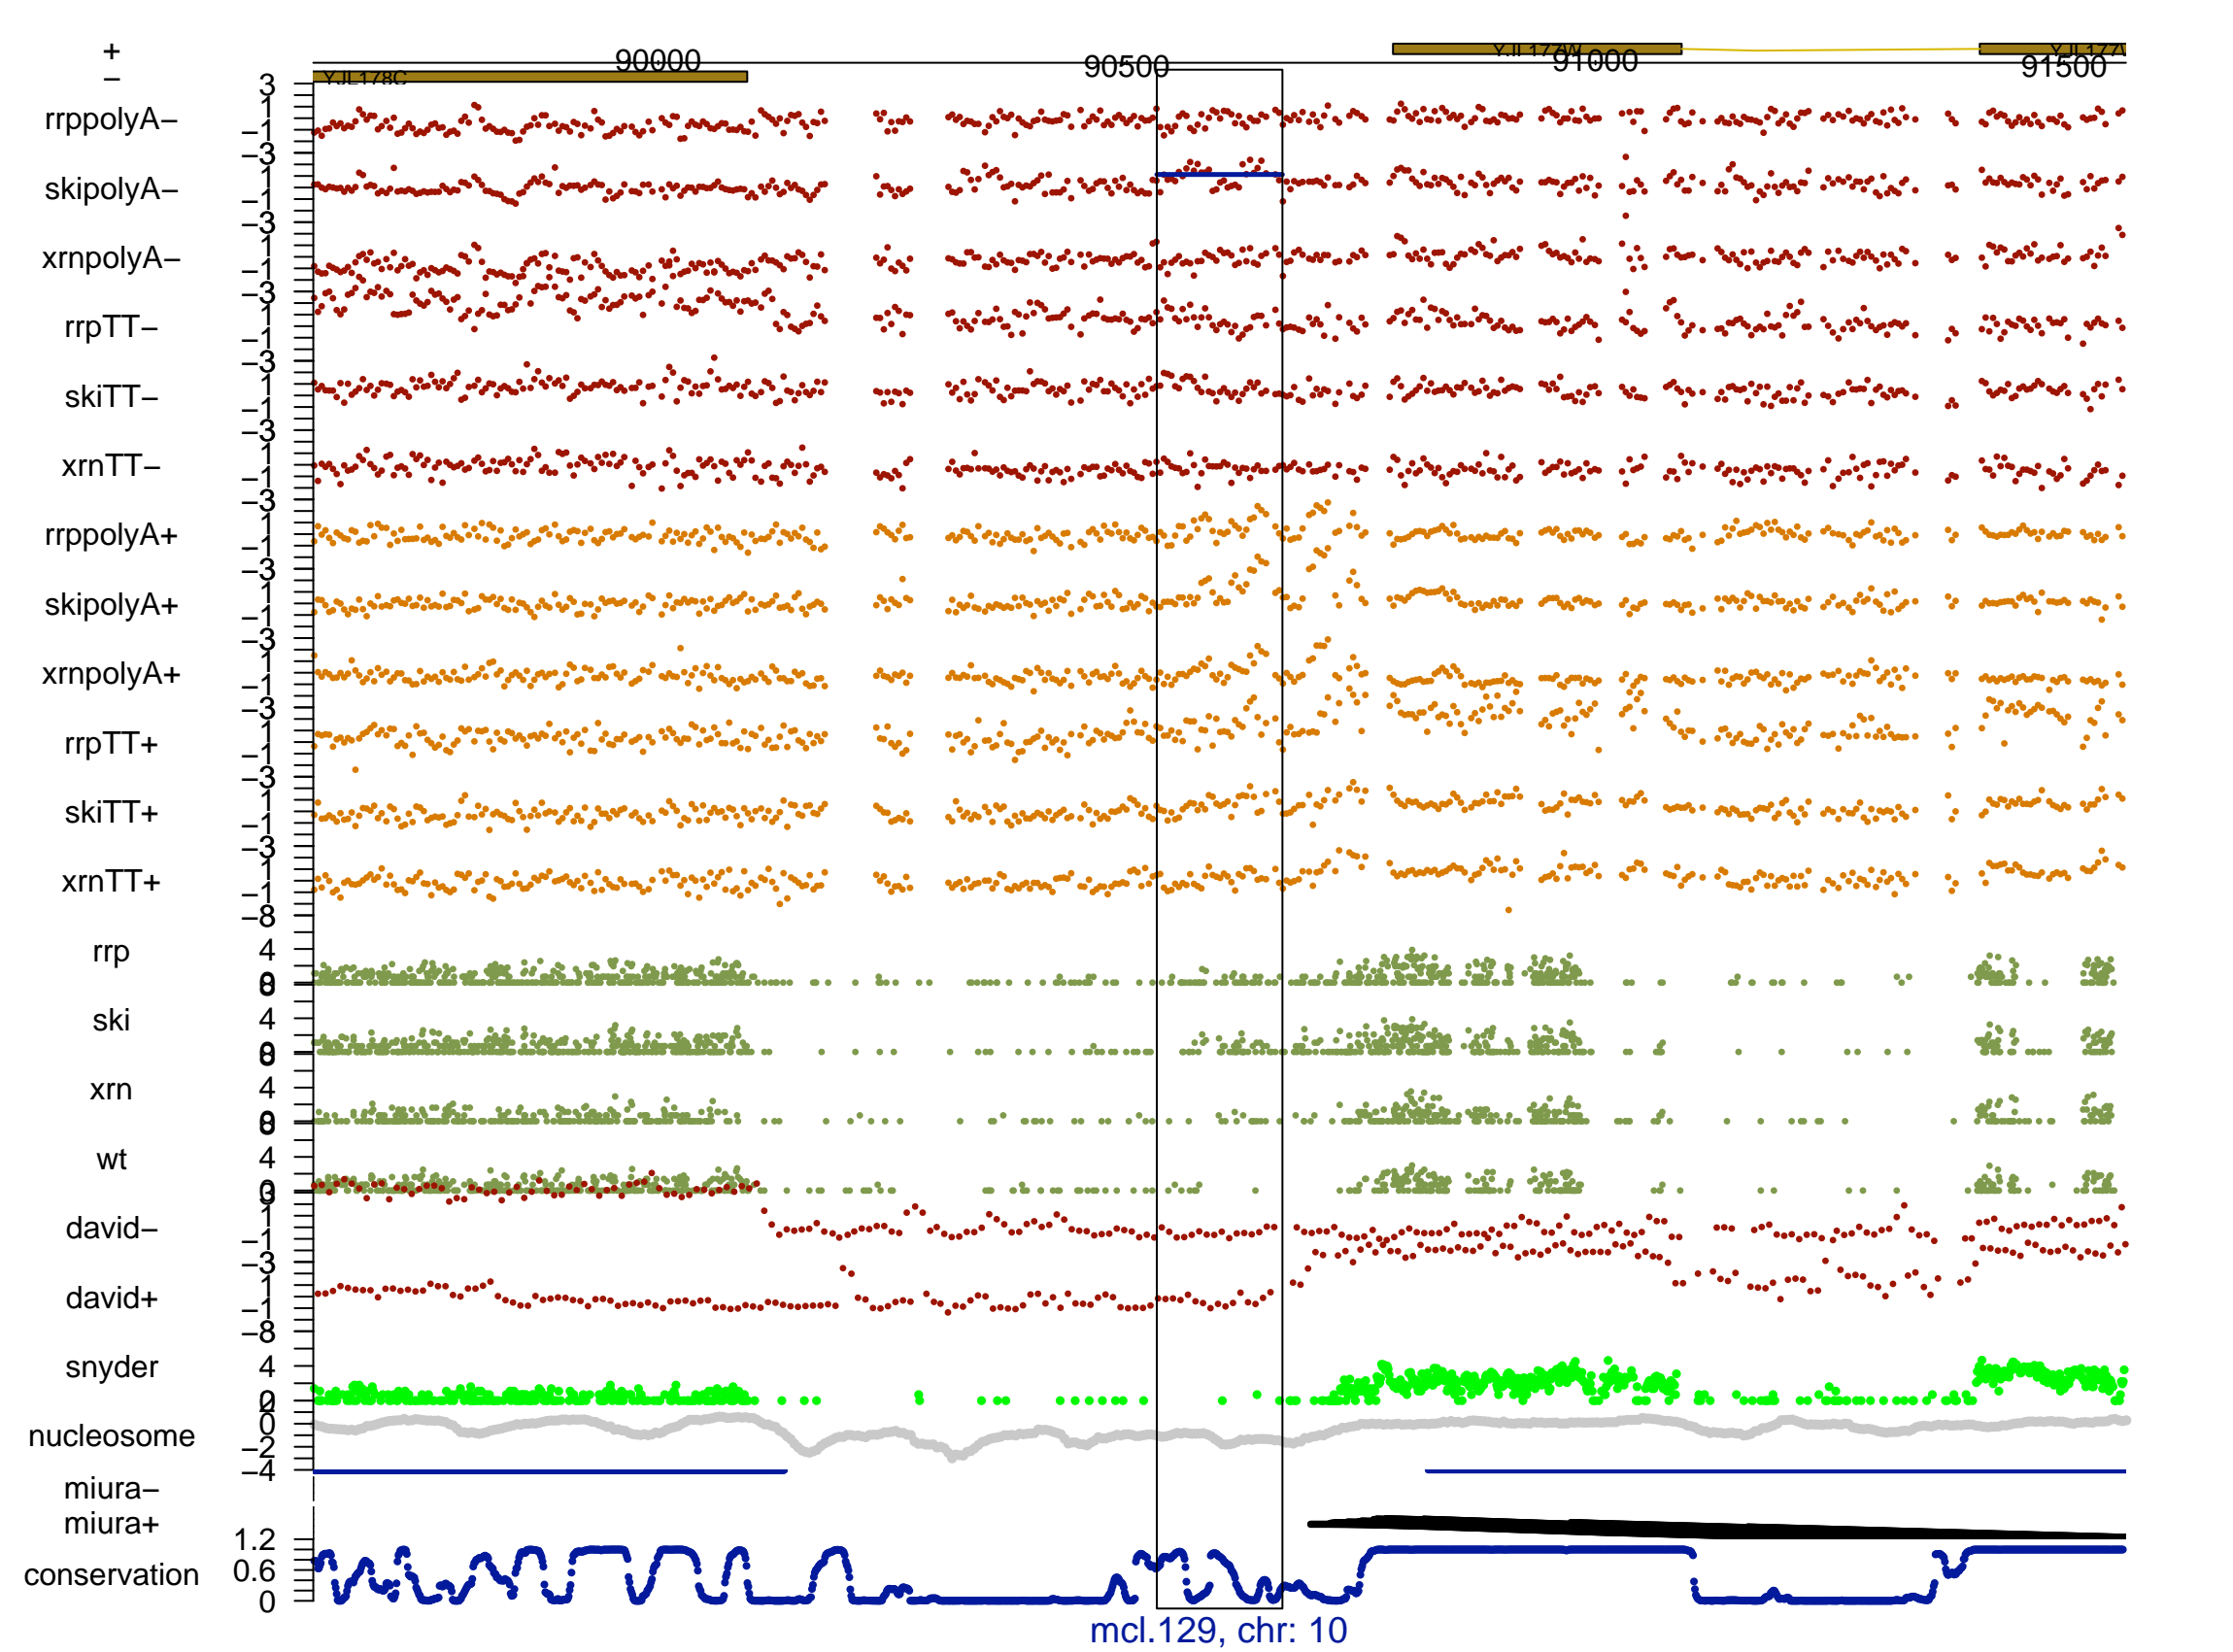





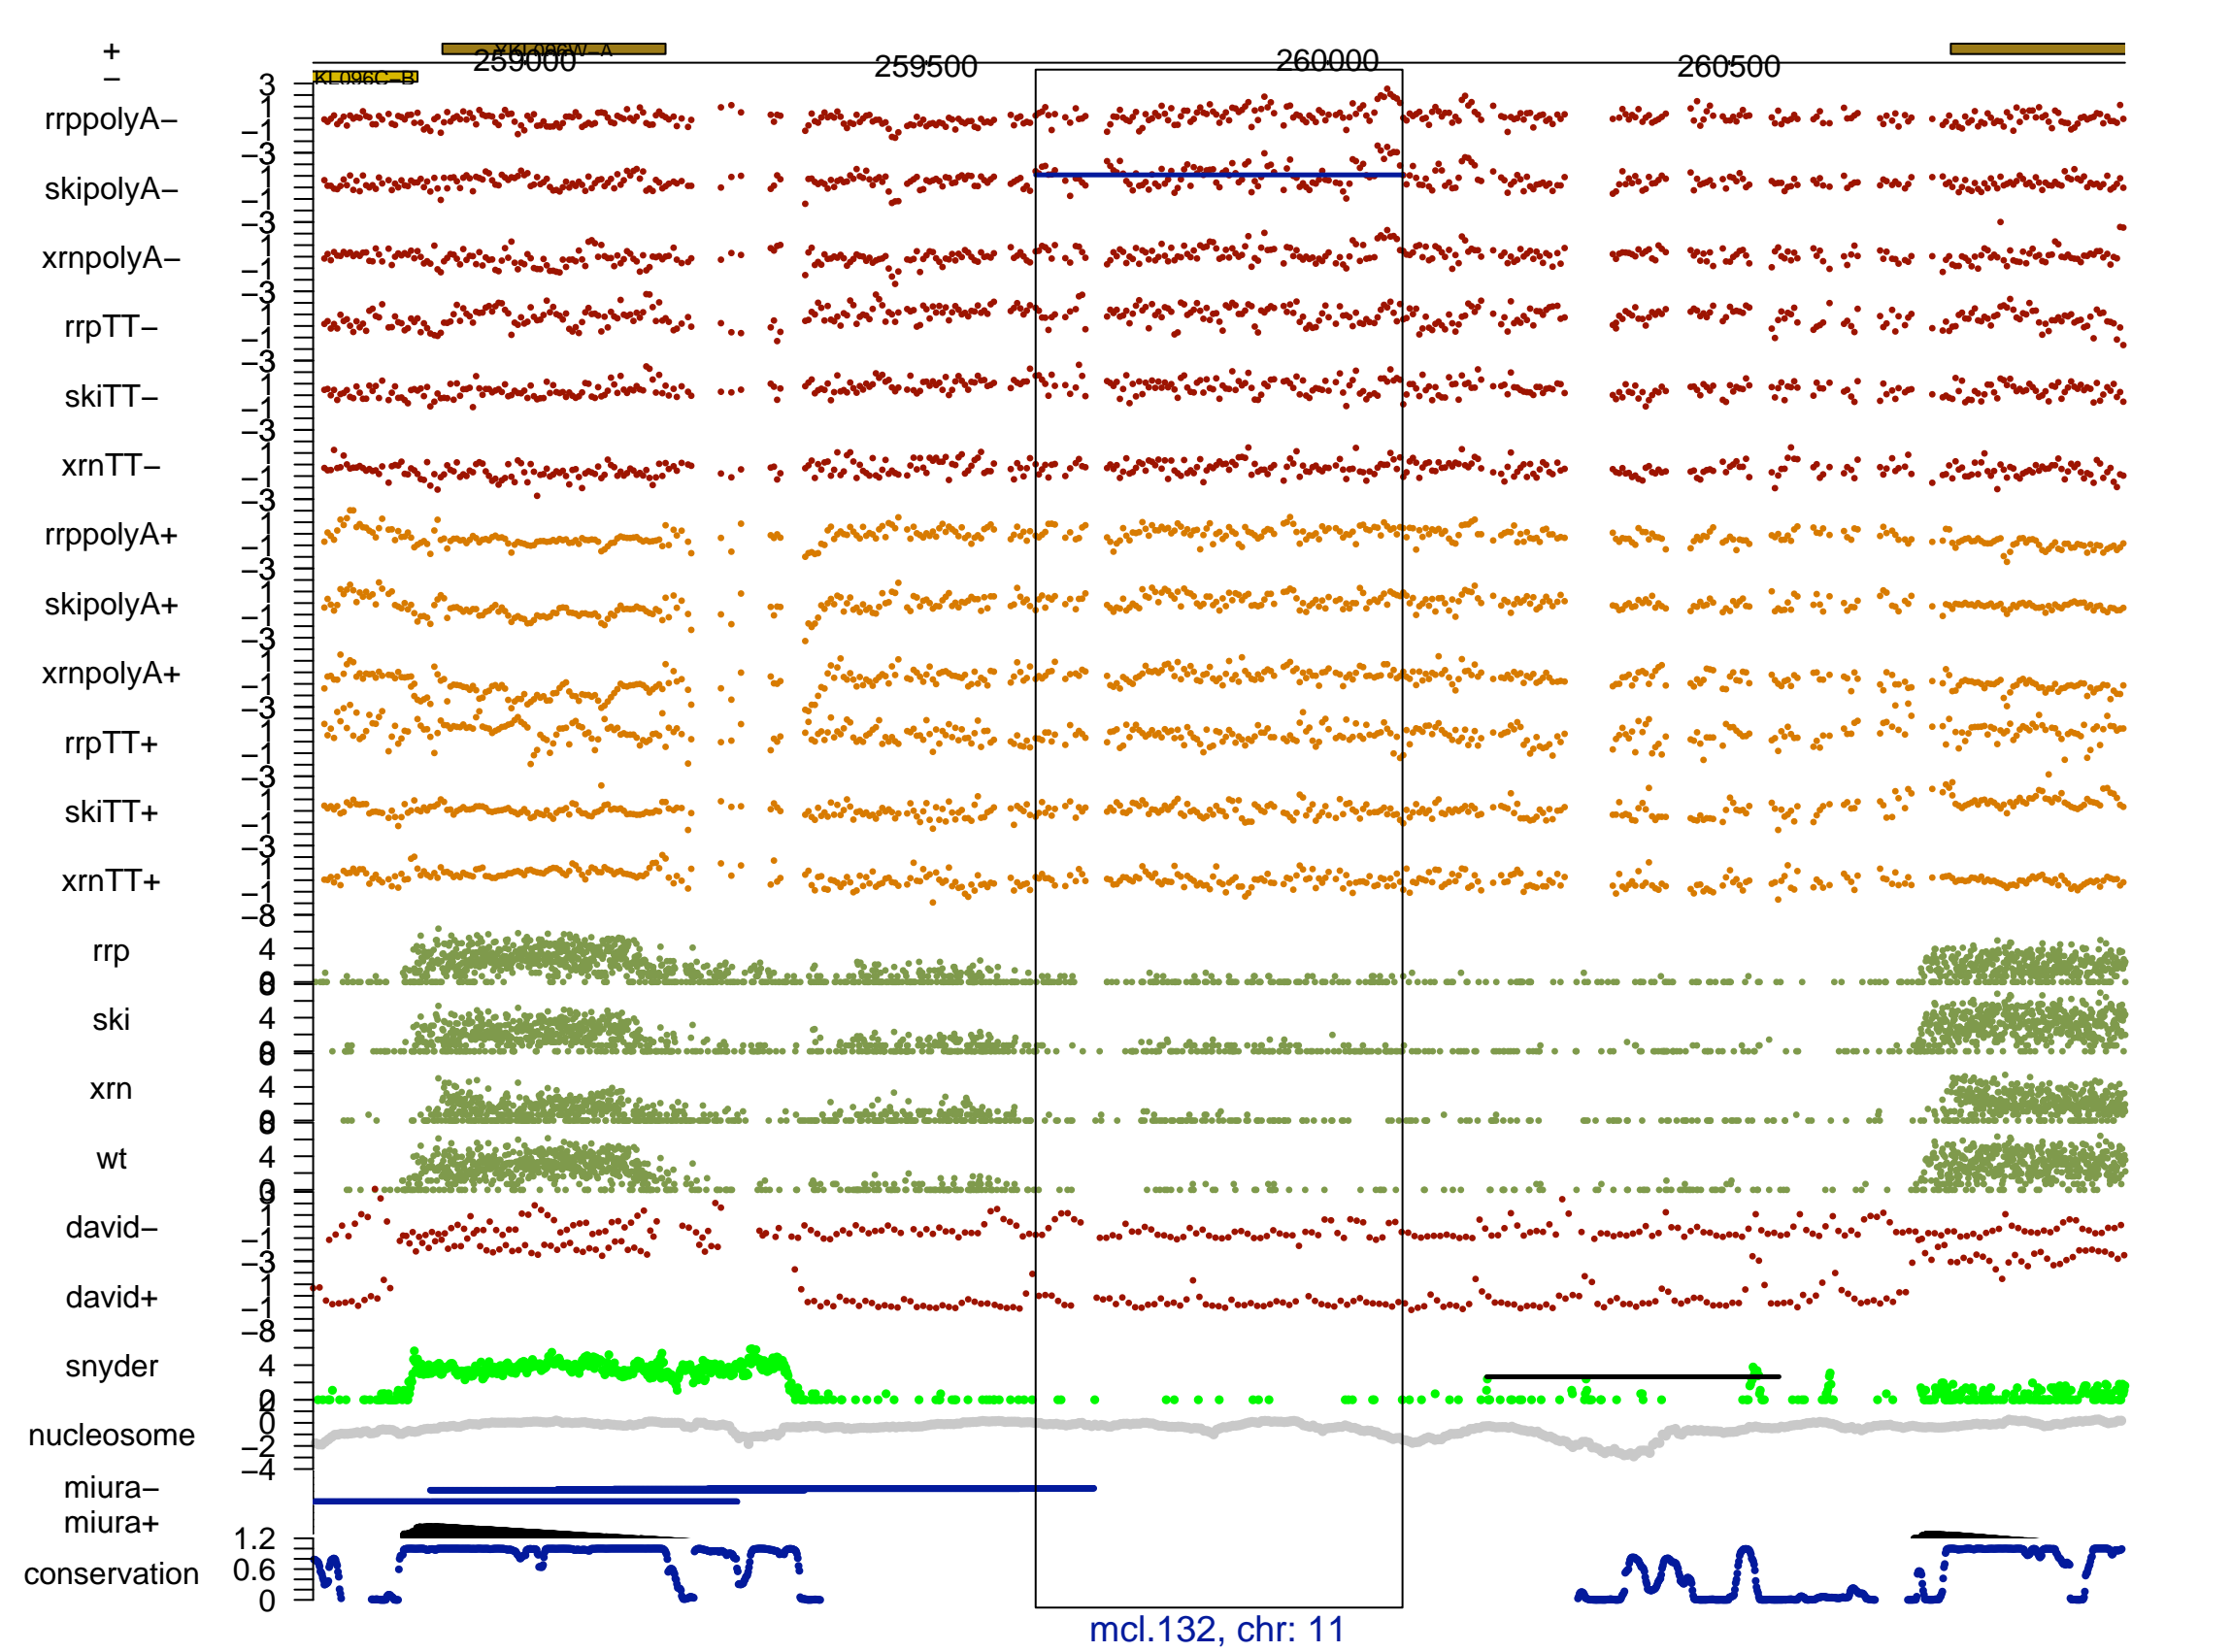

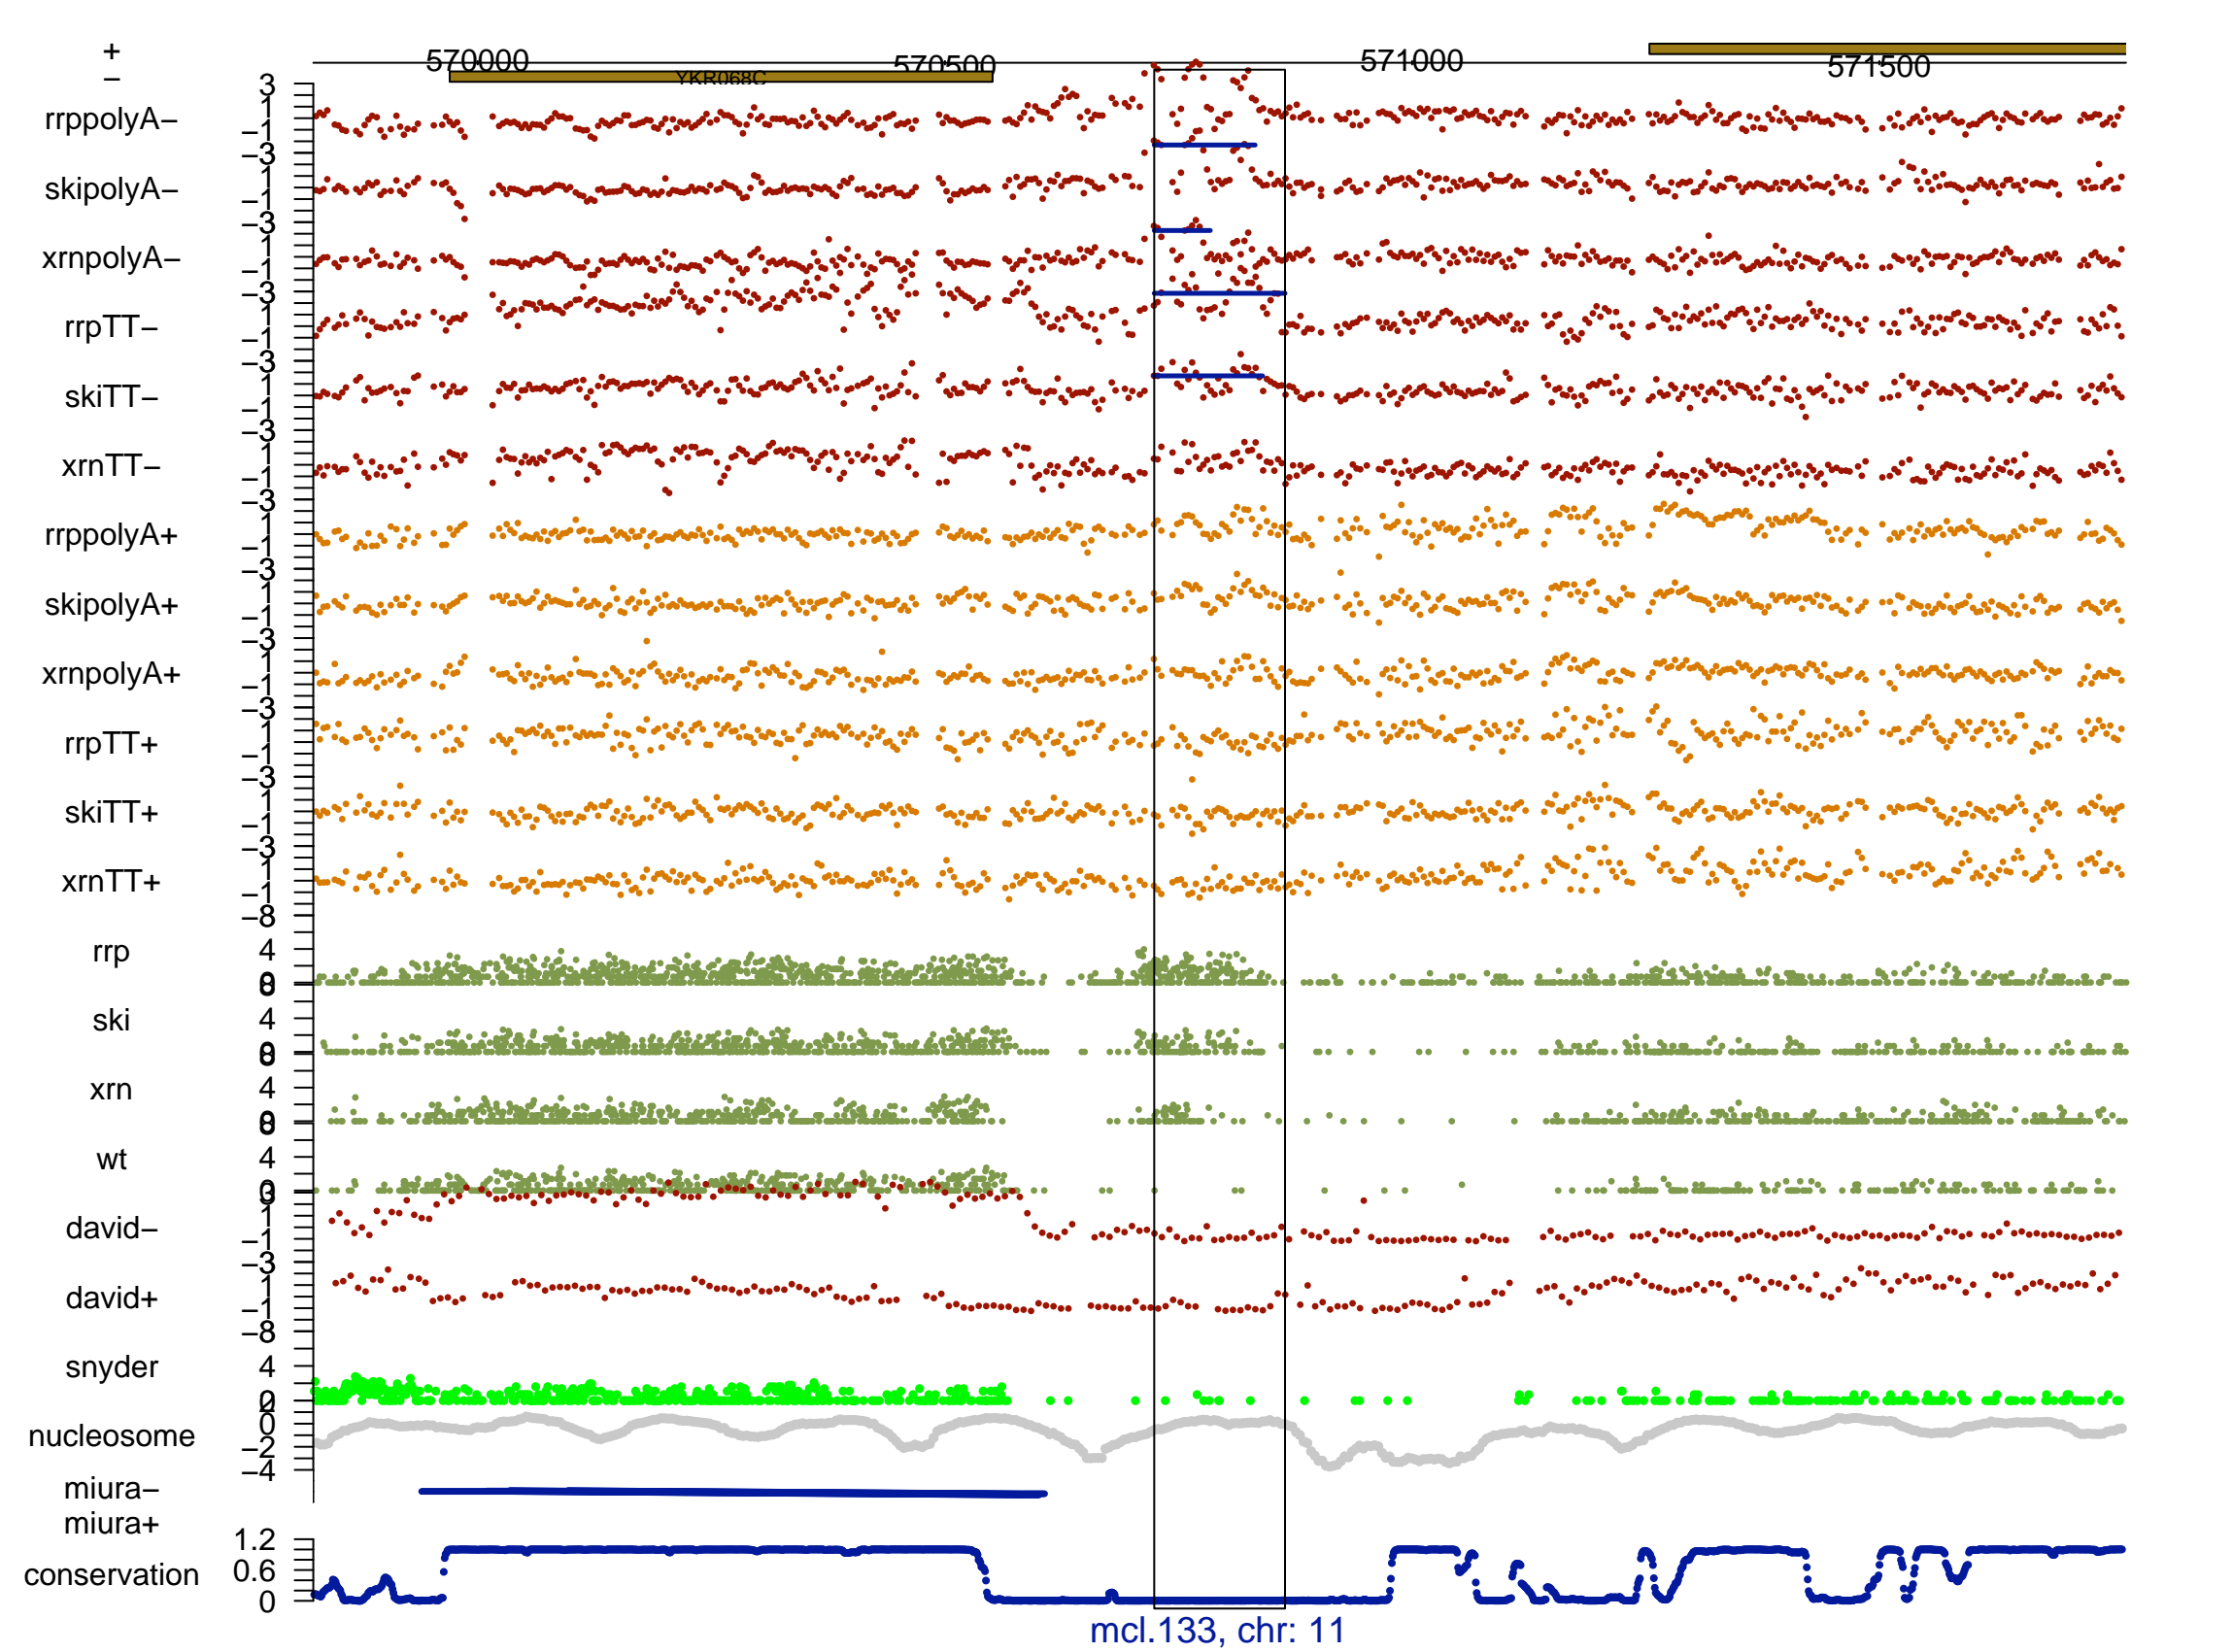

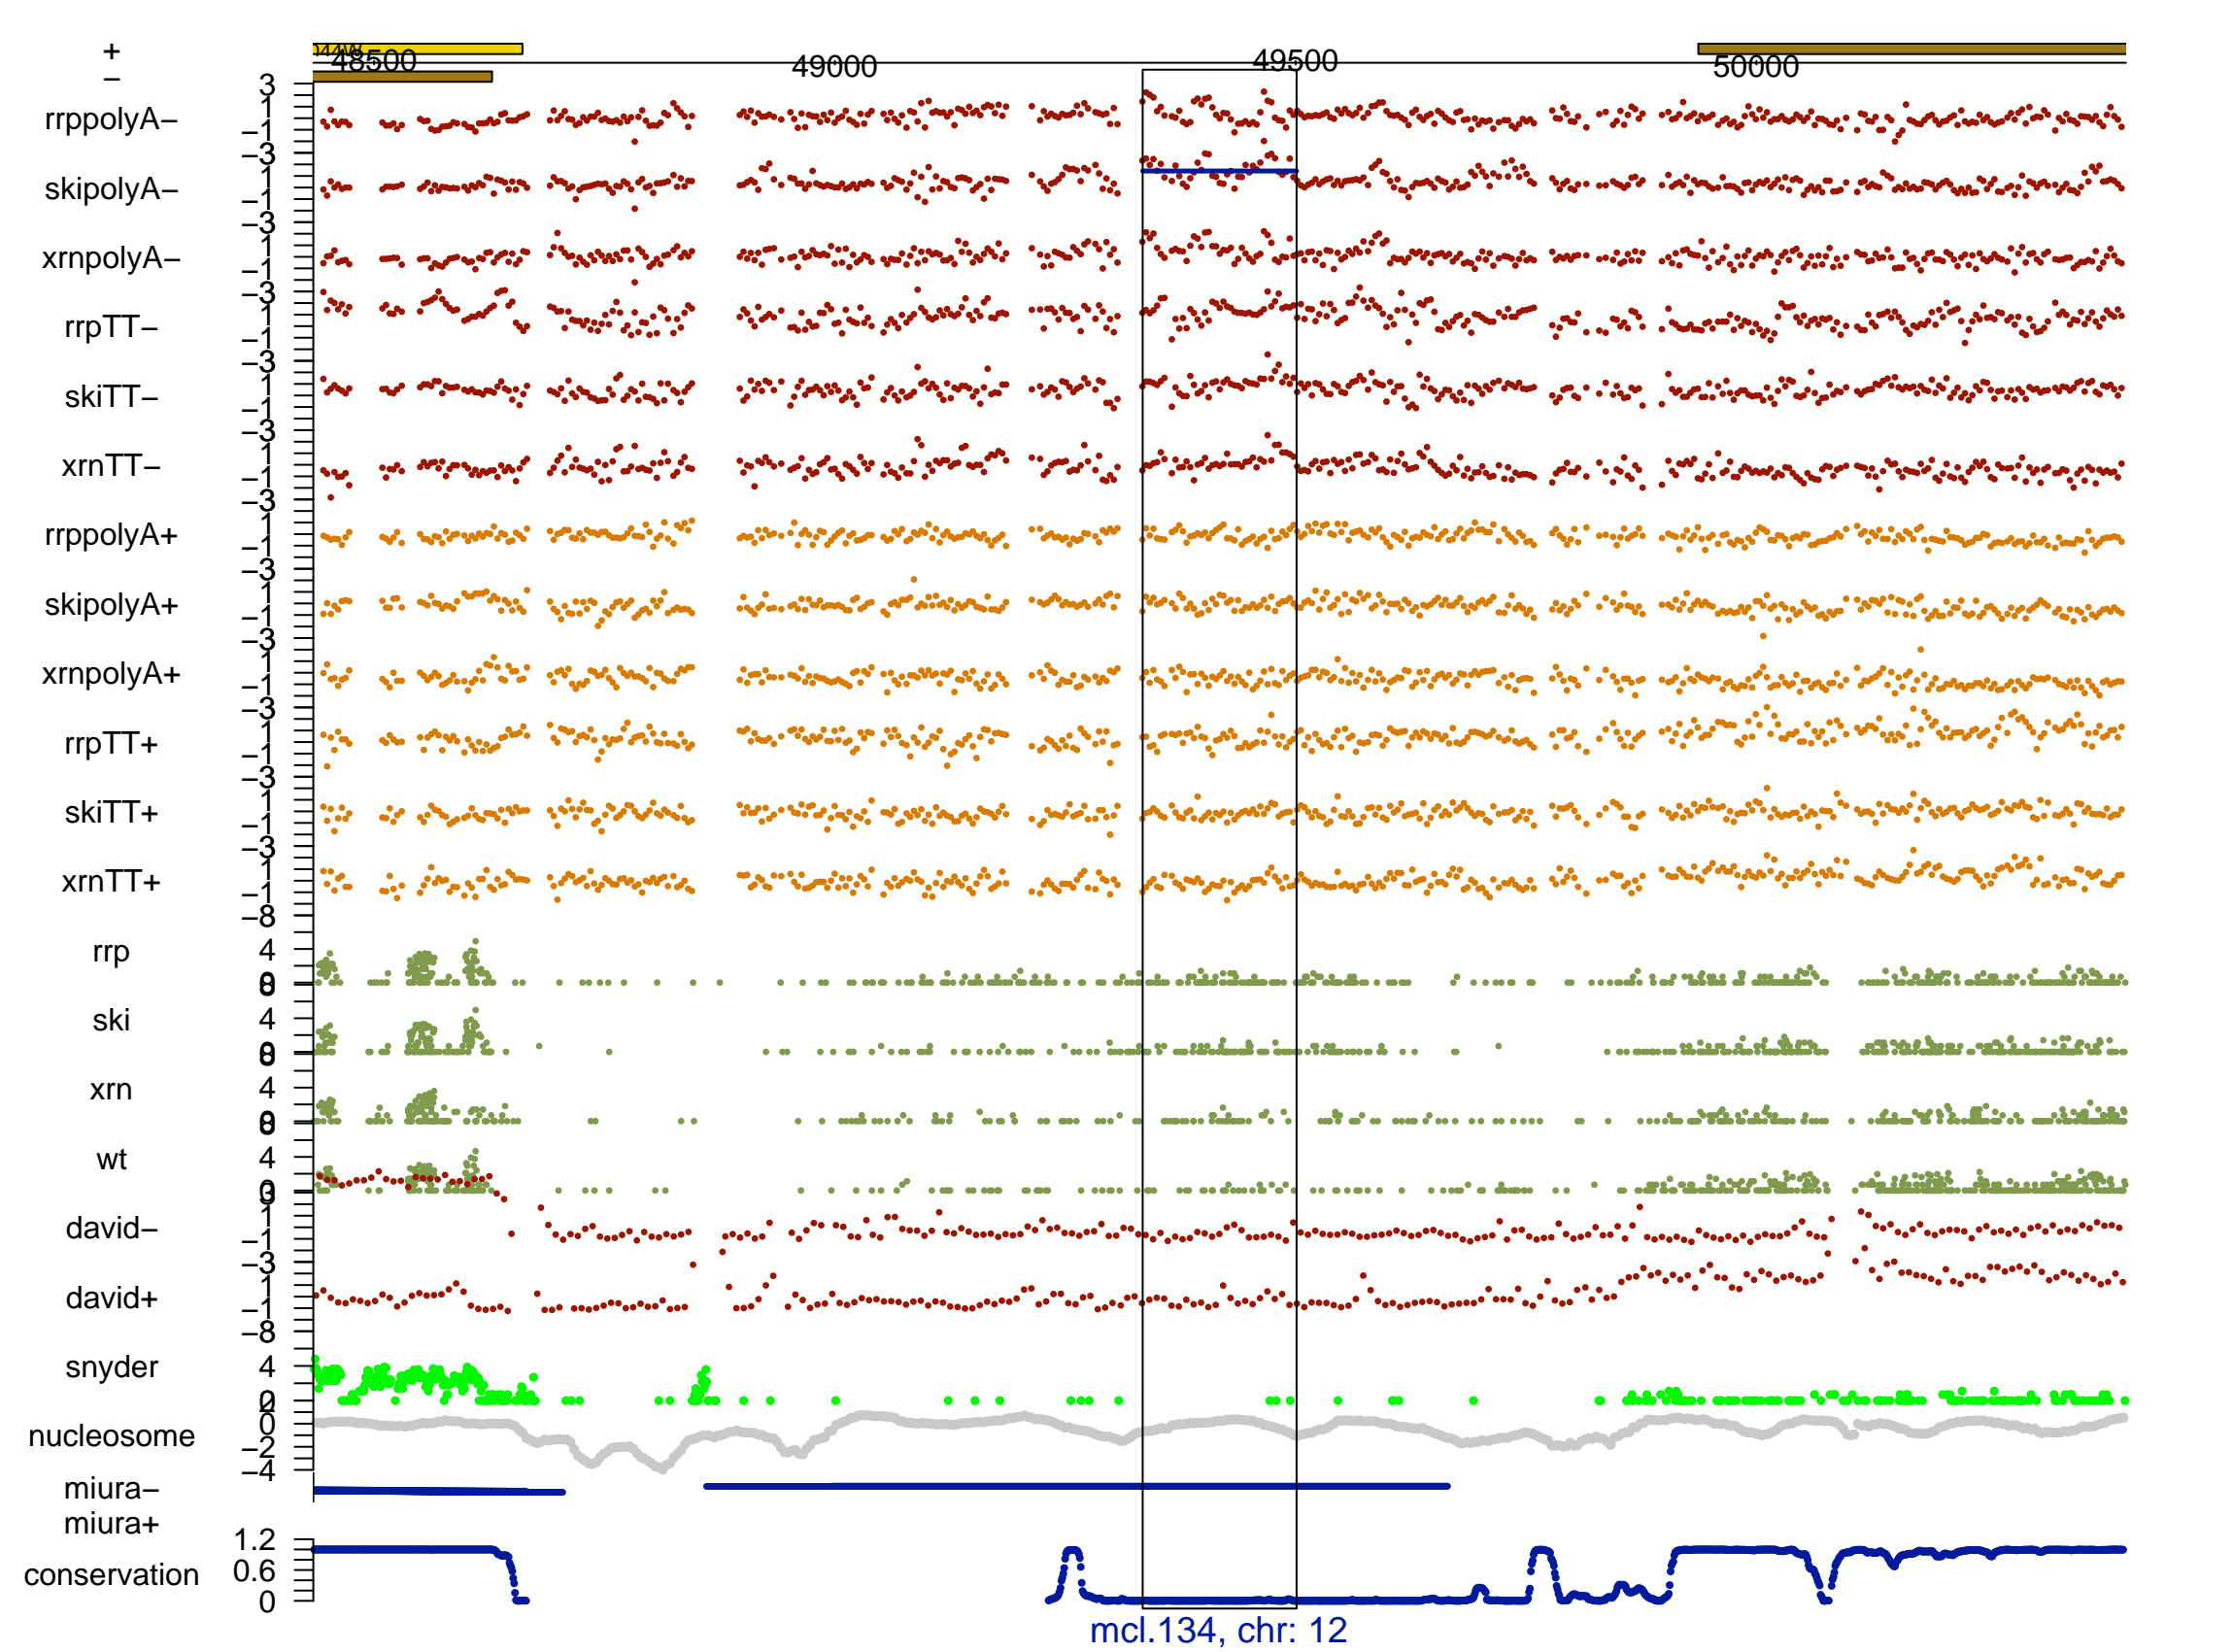









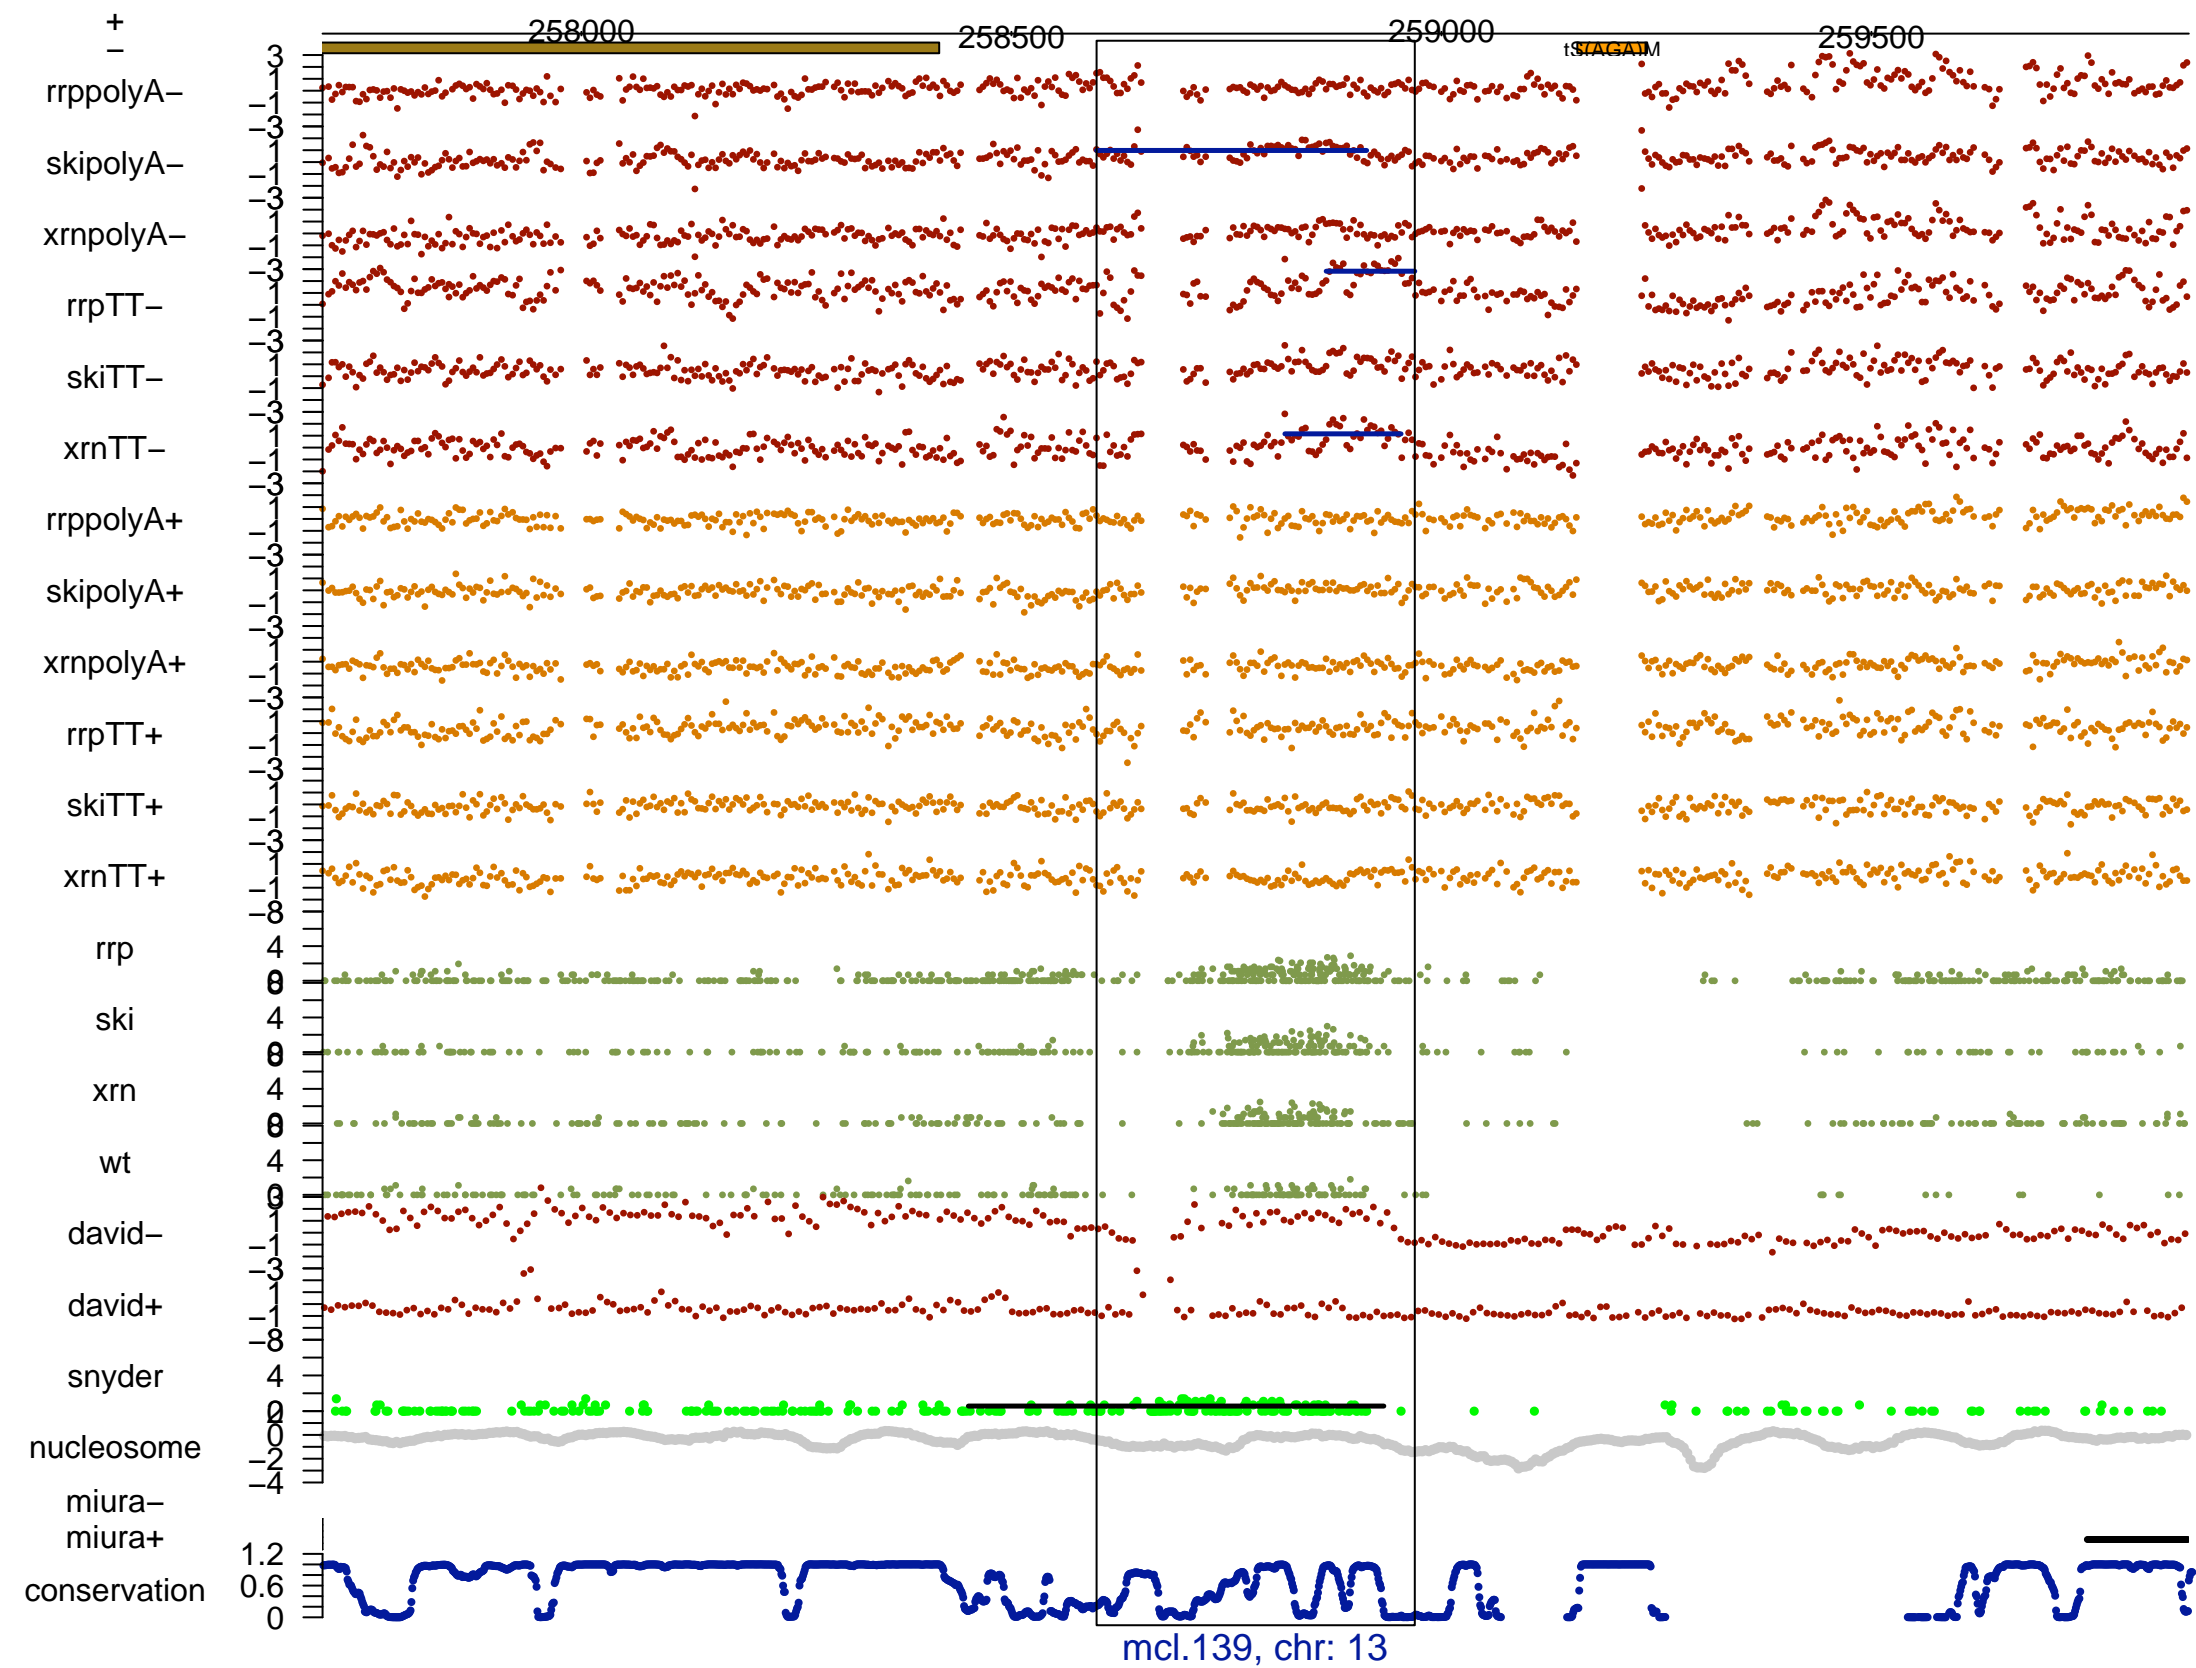

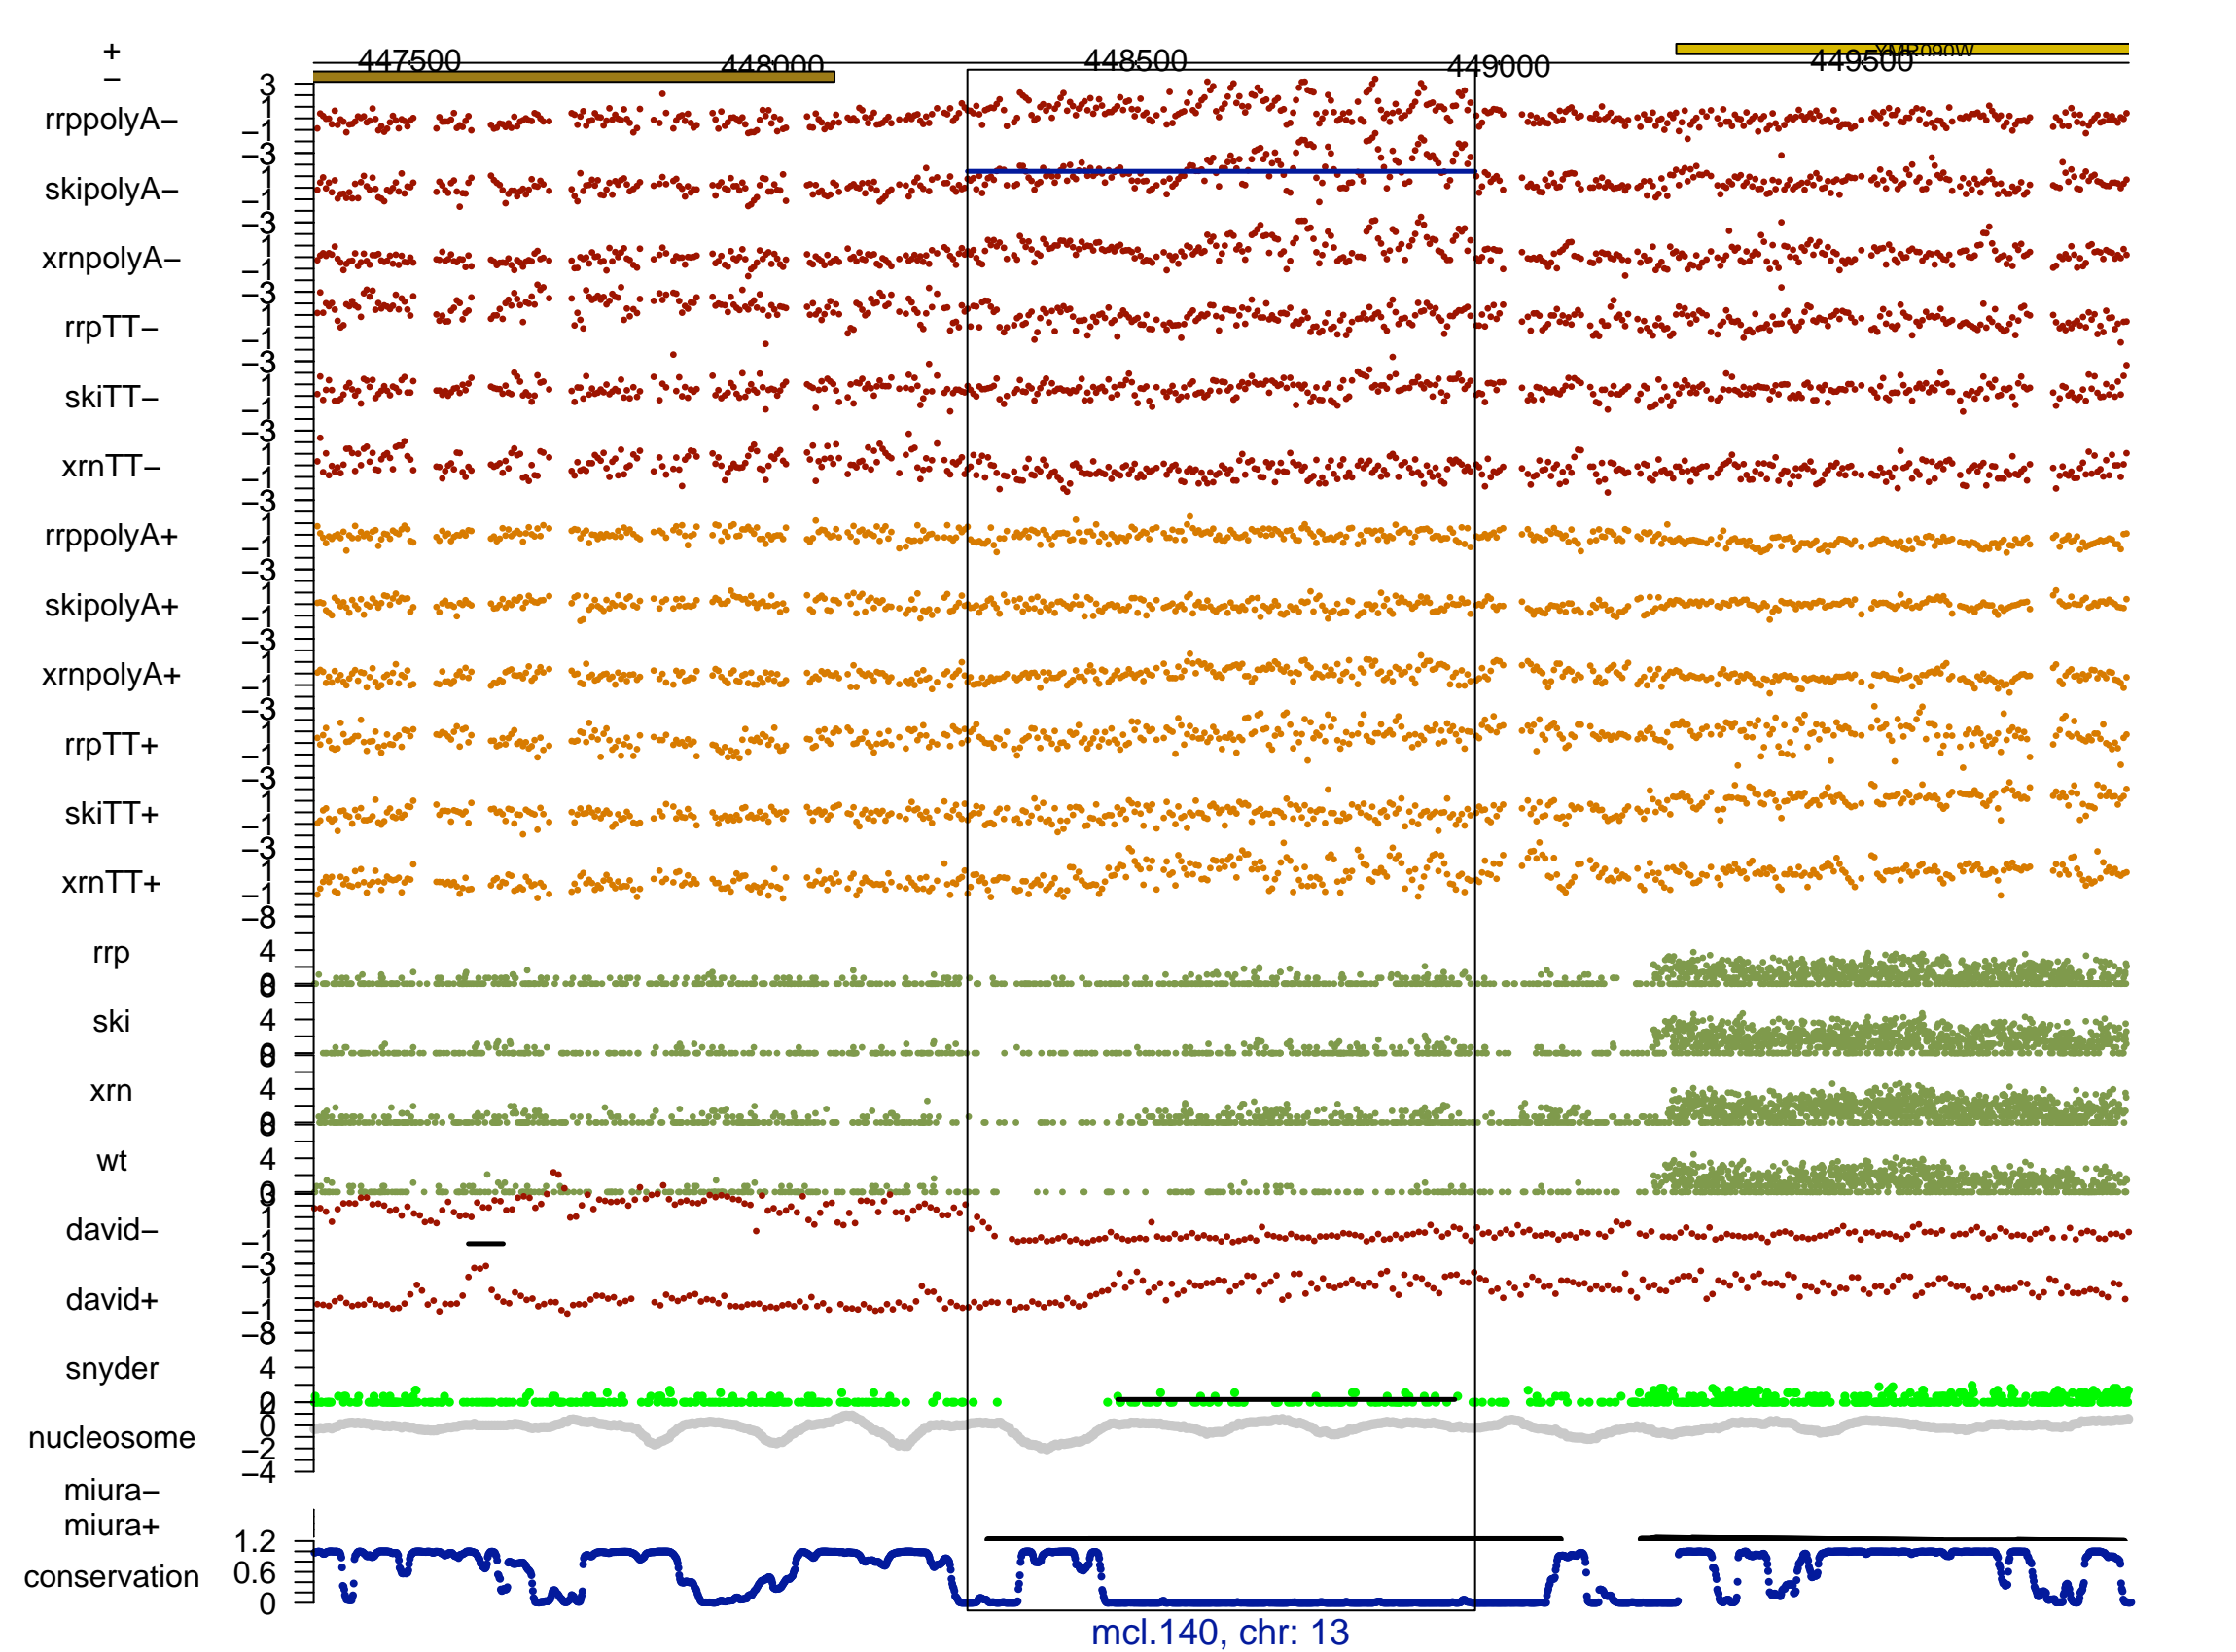



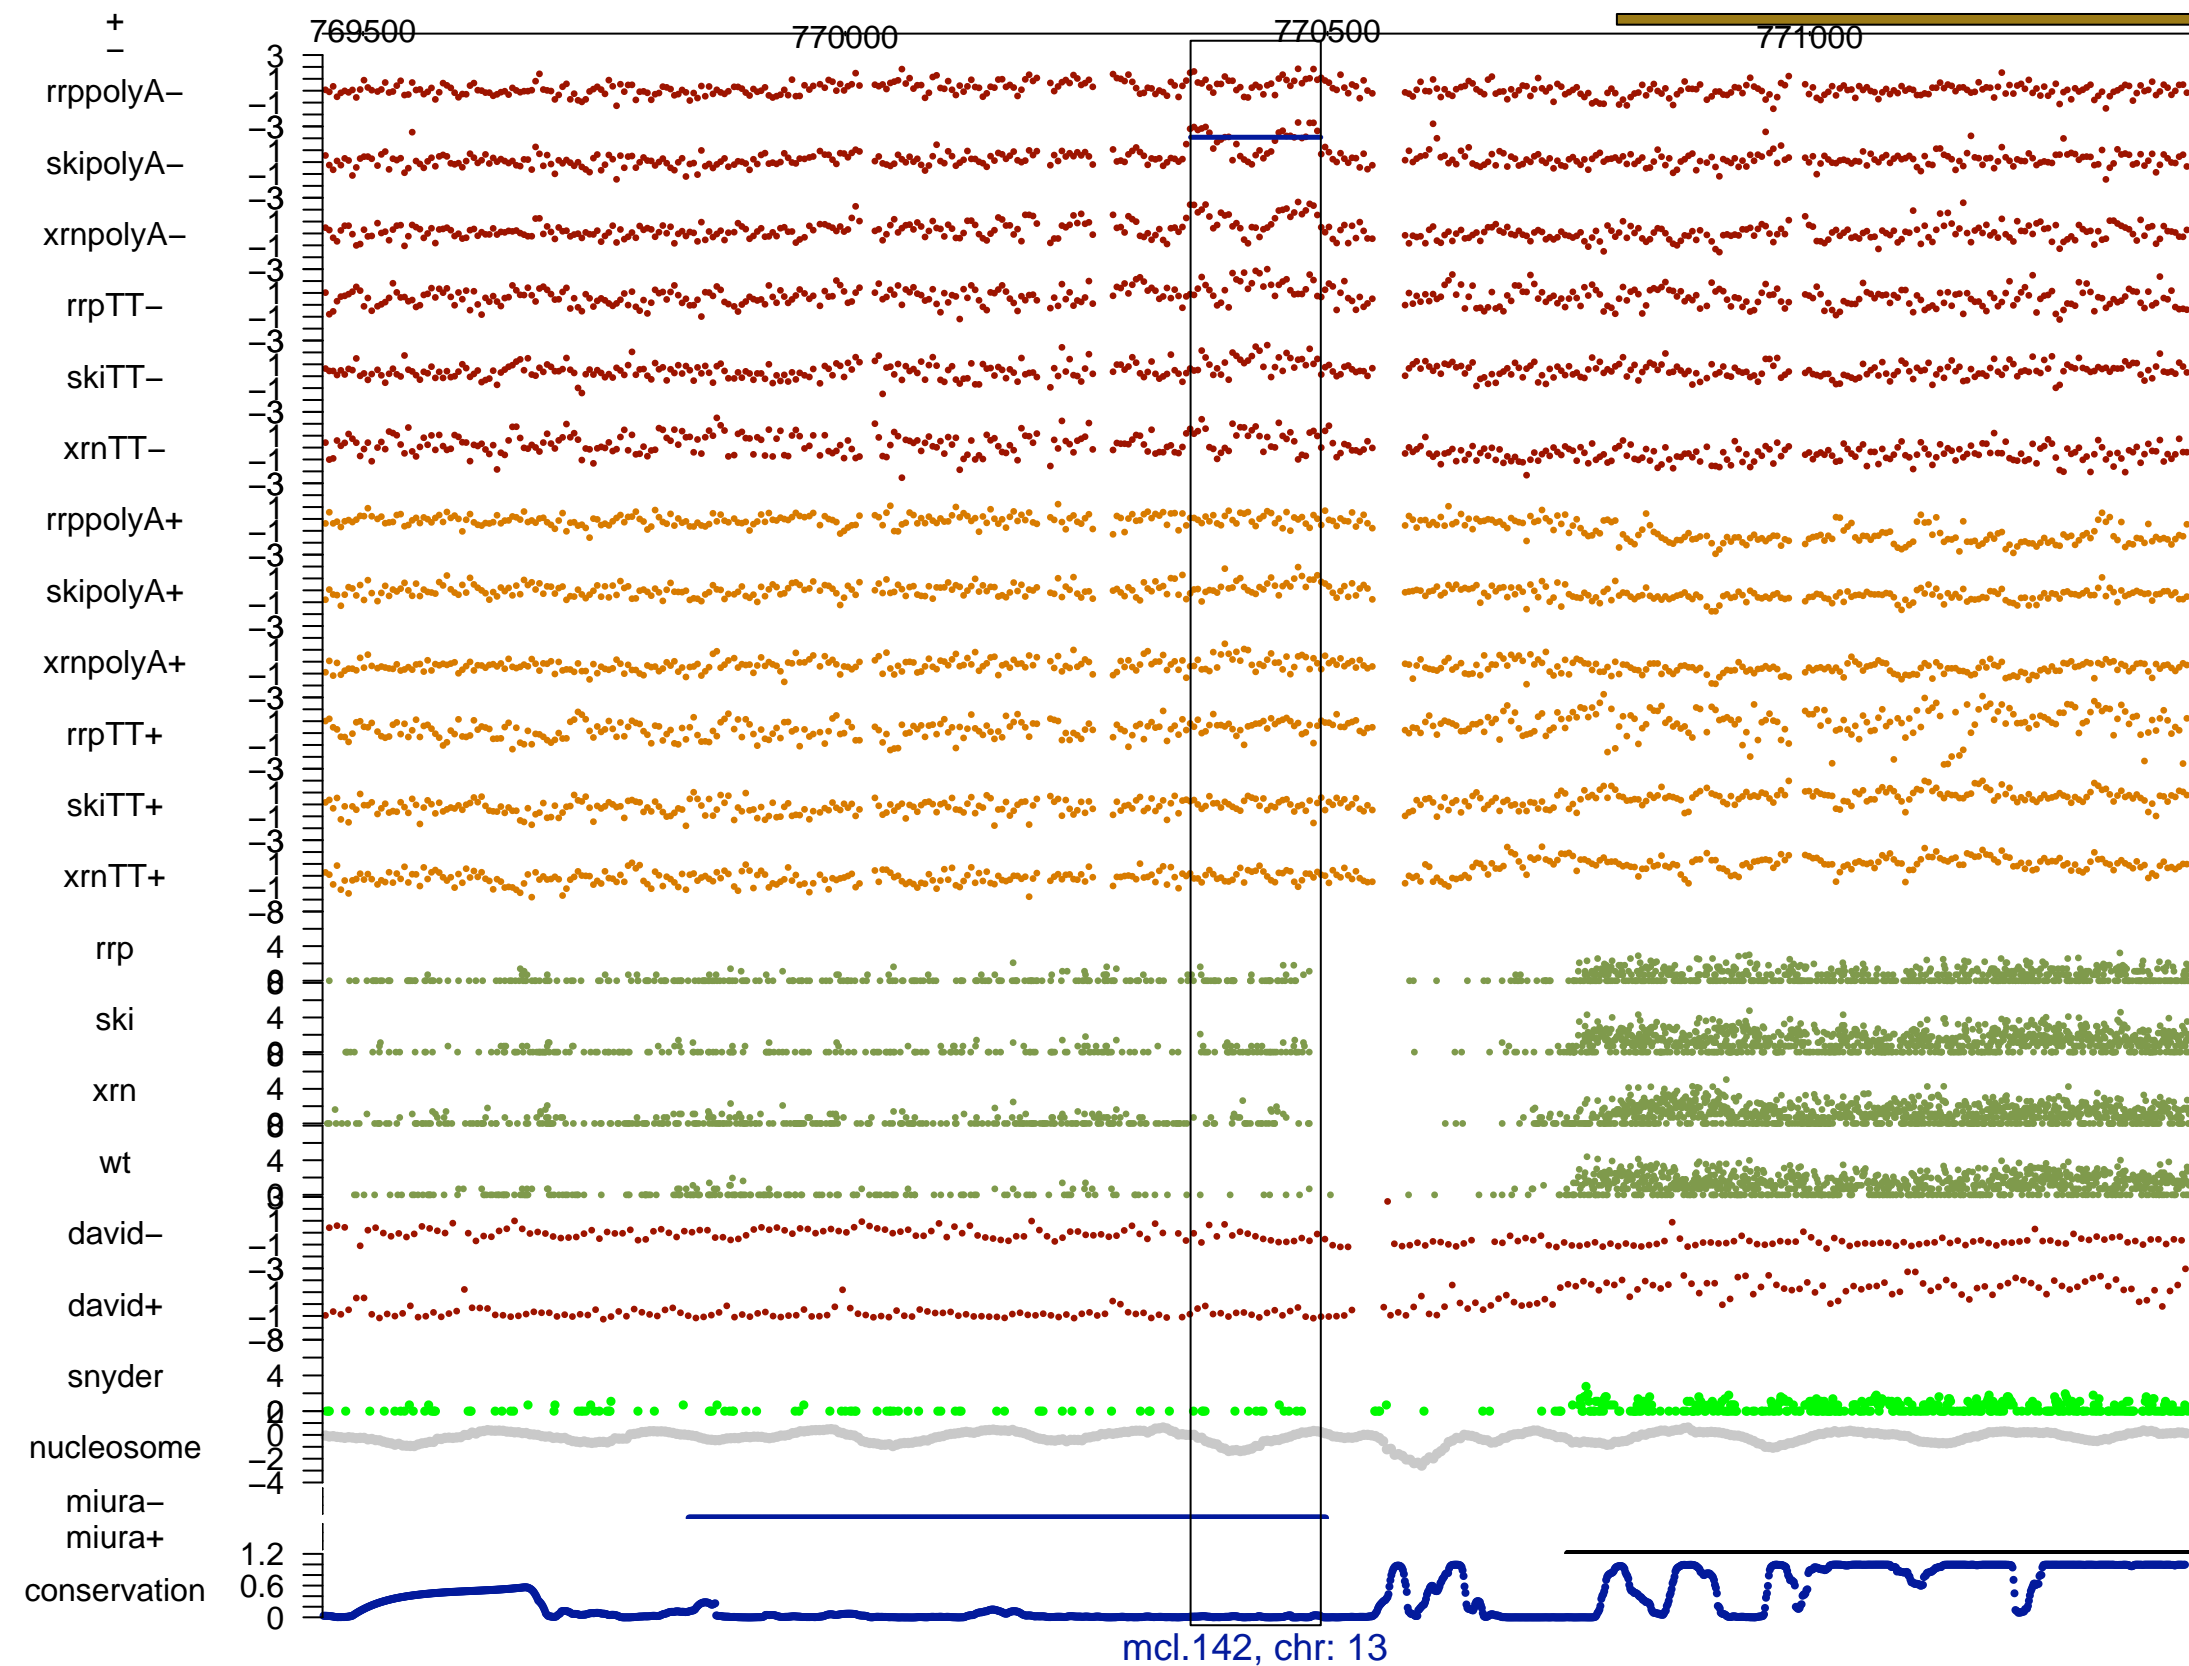

mcl.142, chr: 13

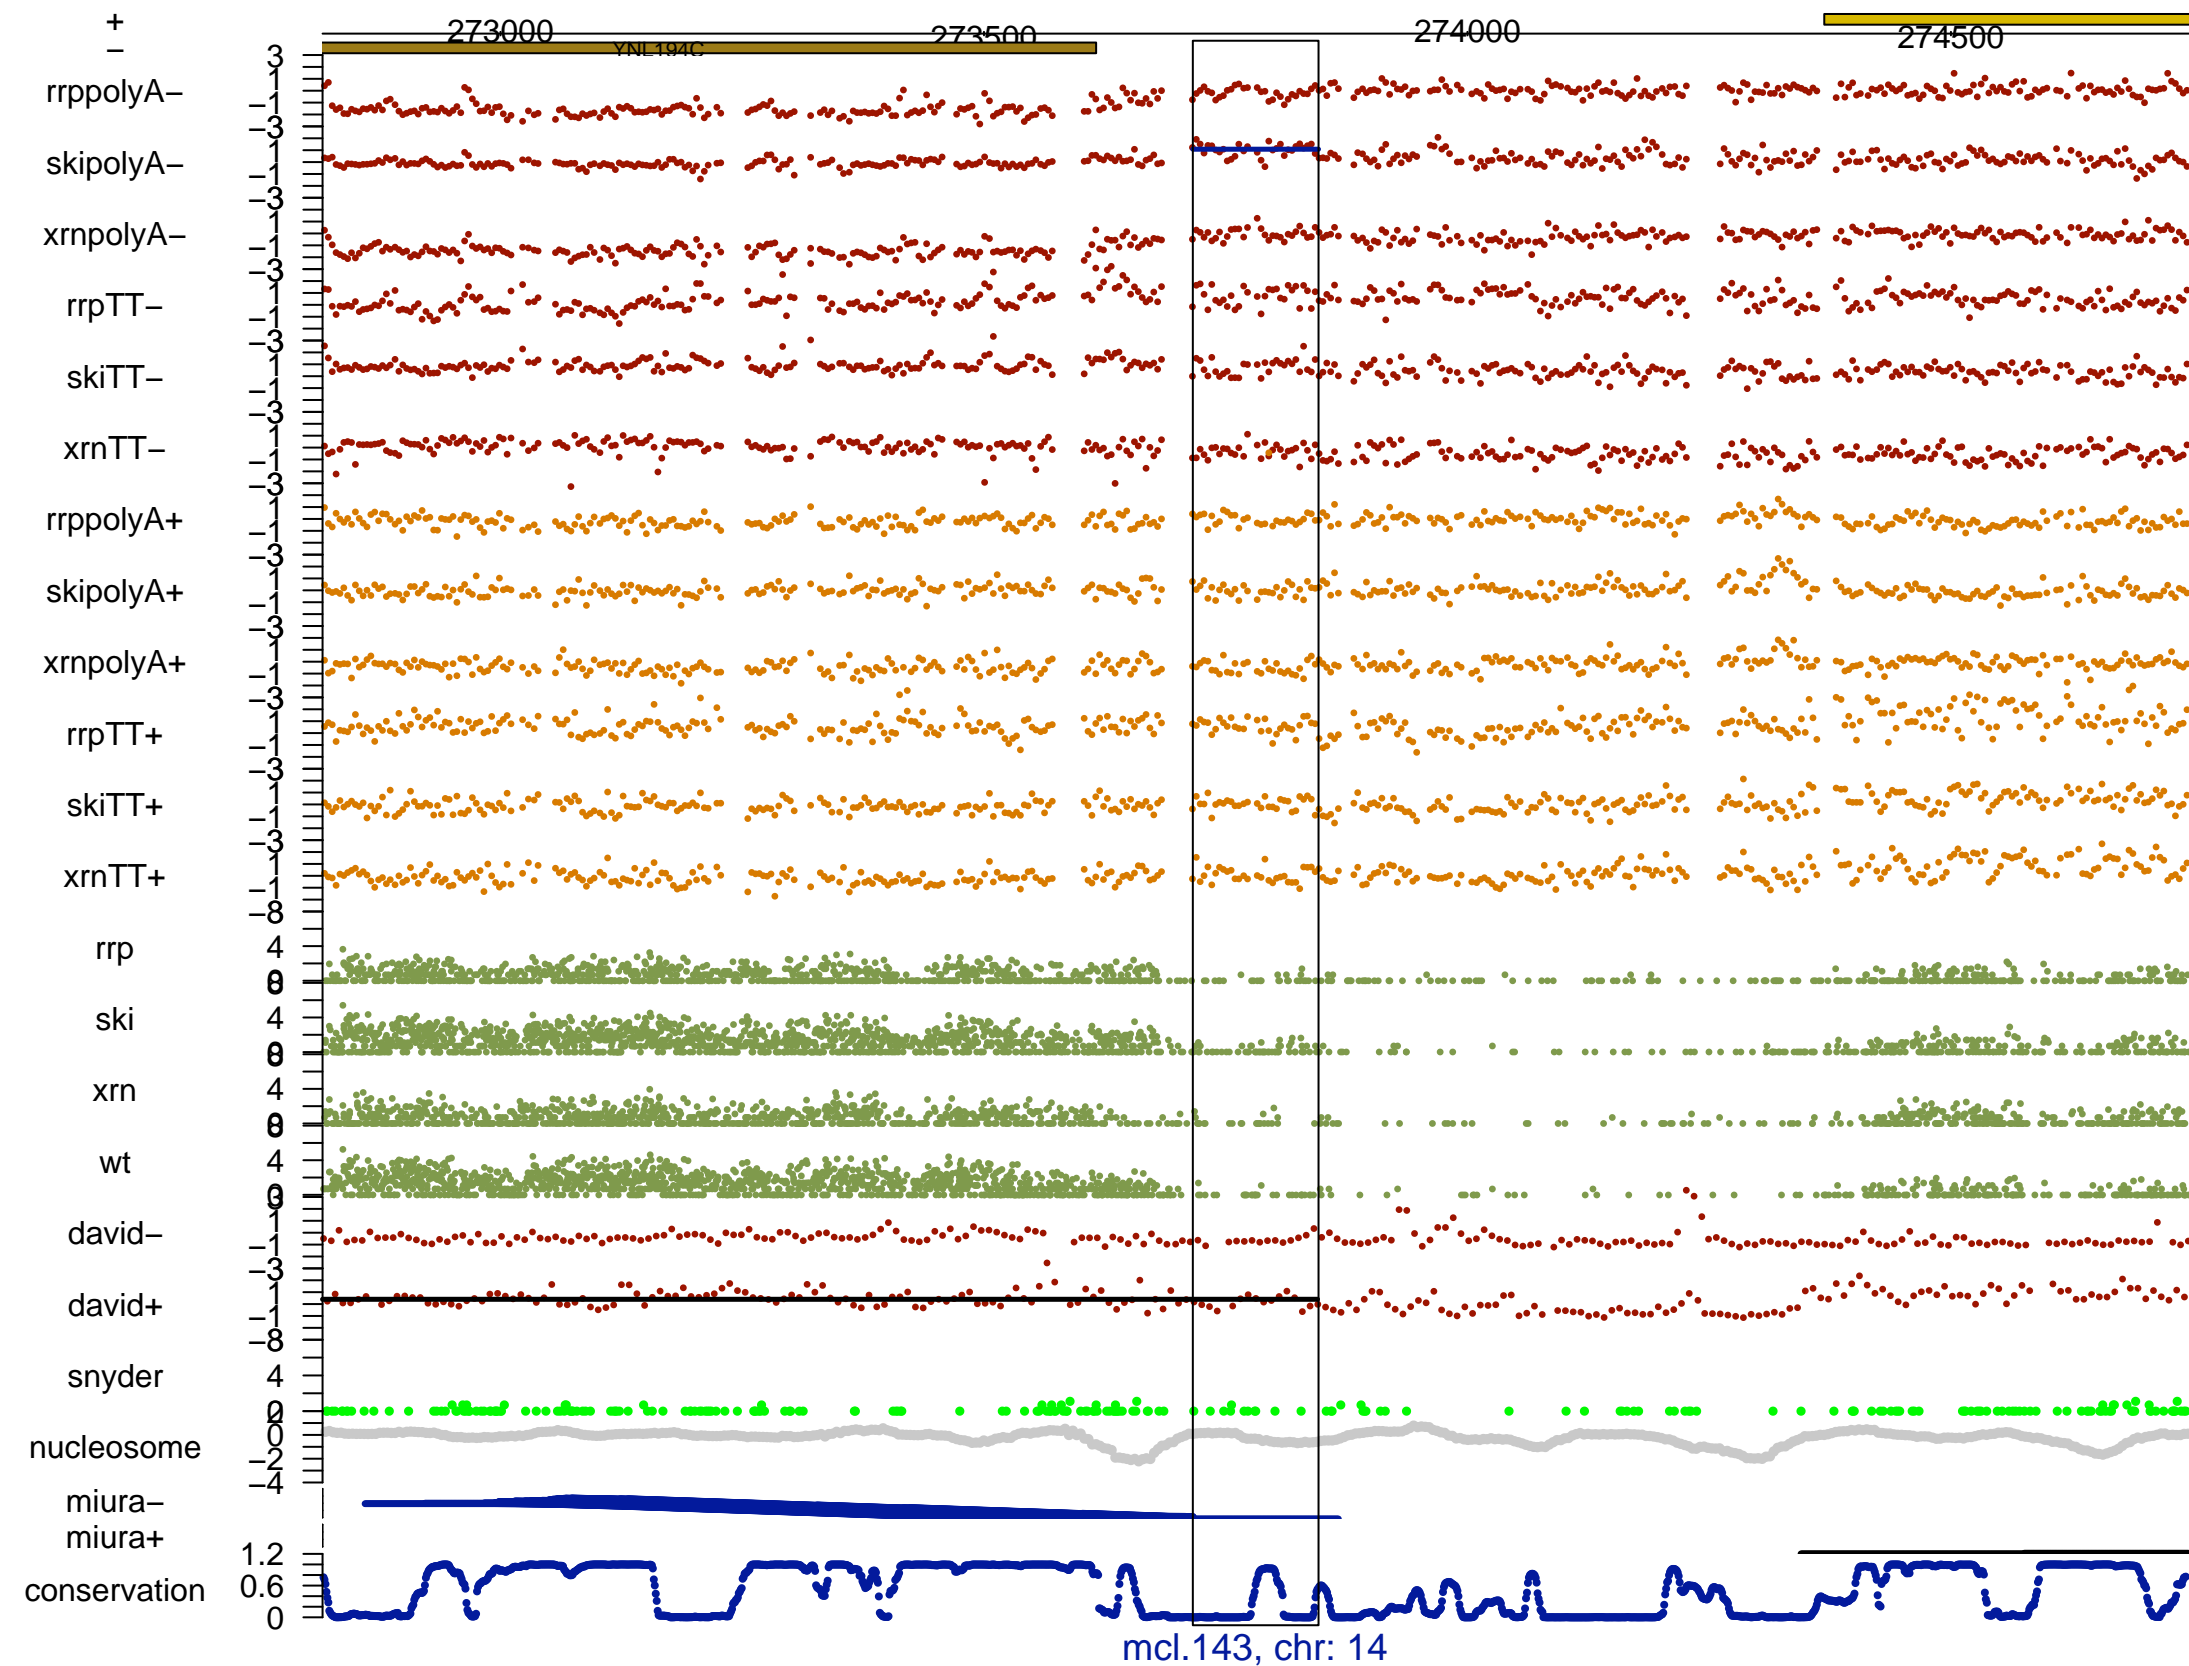







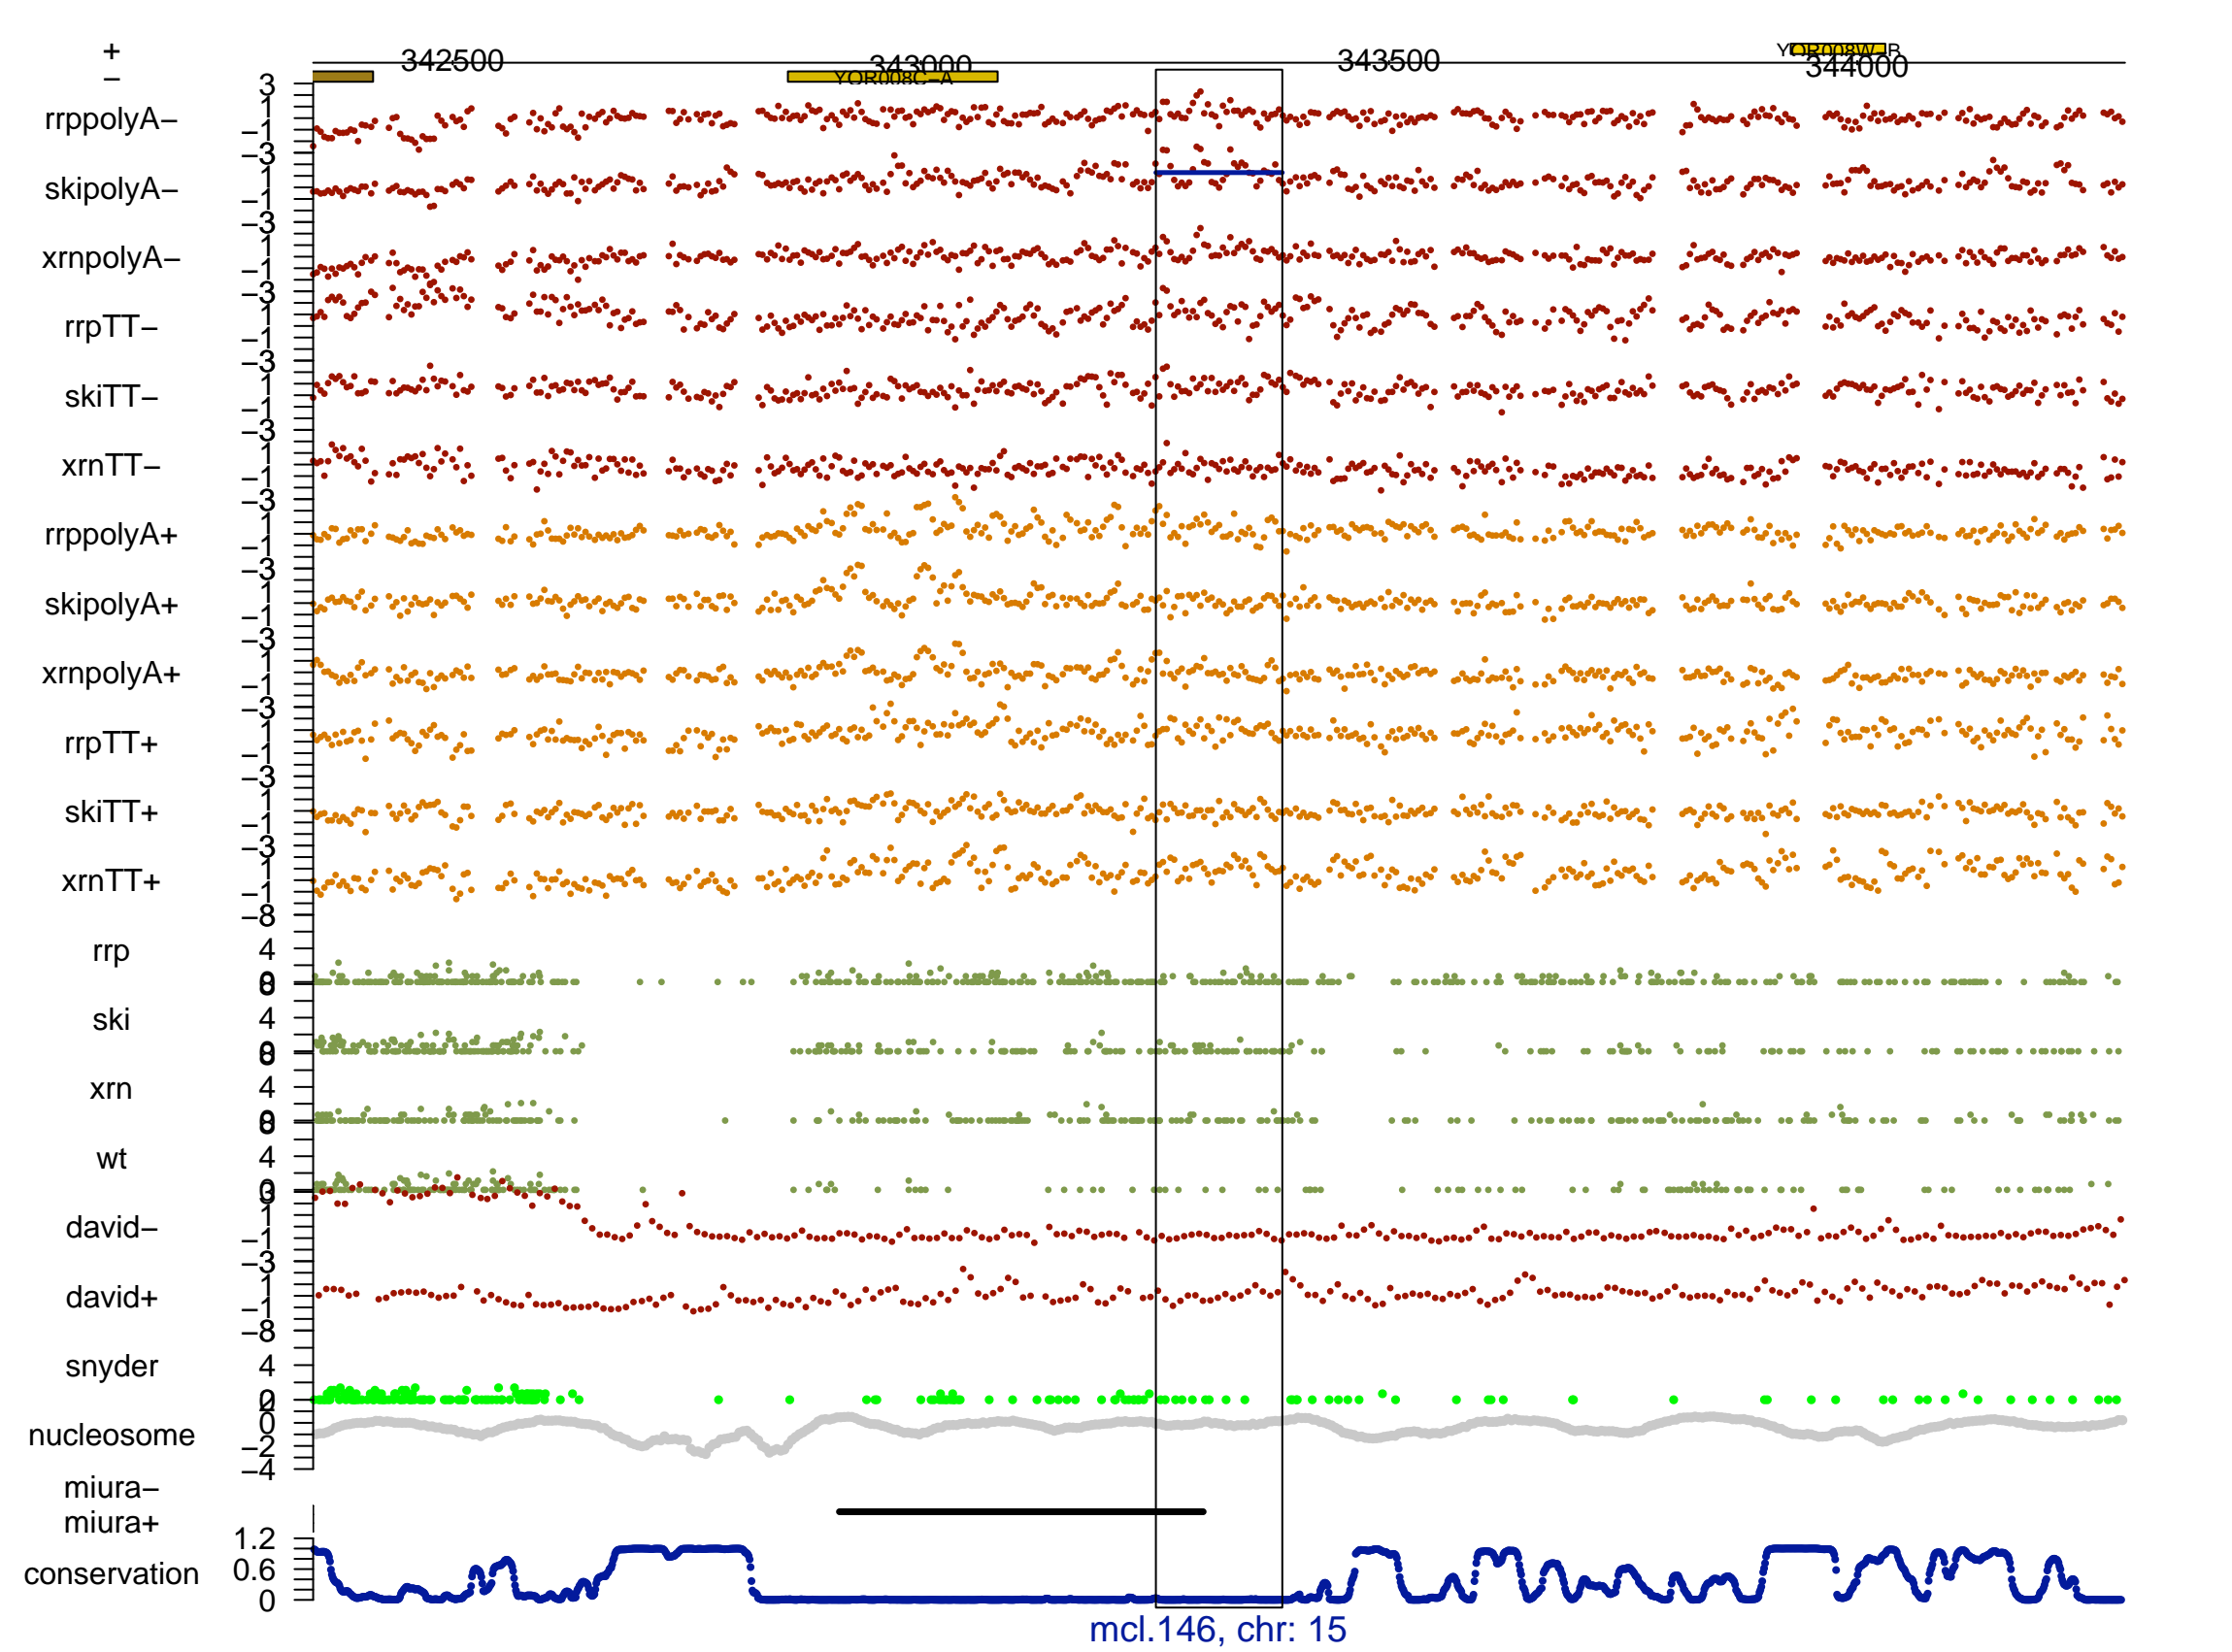

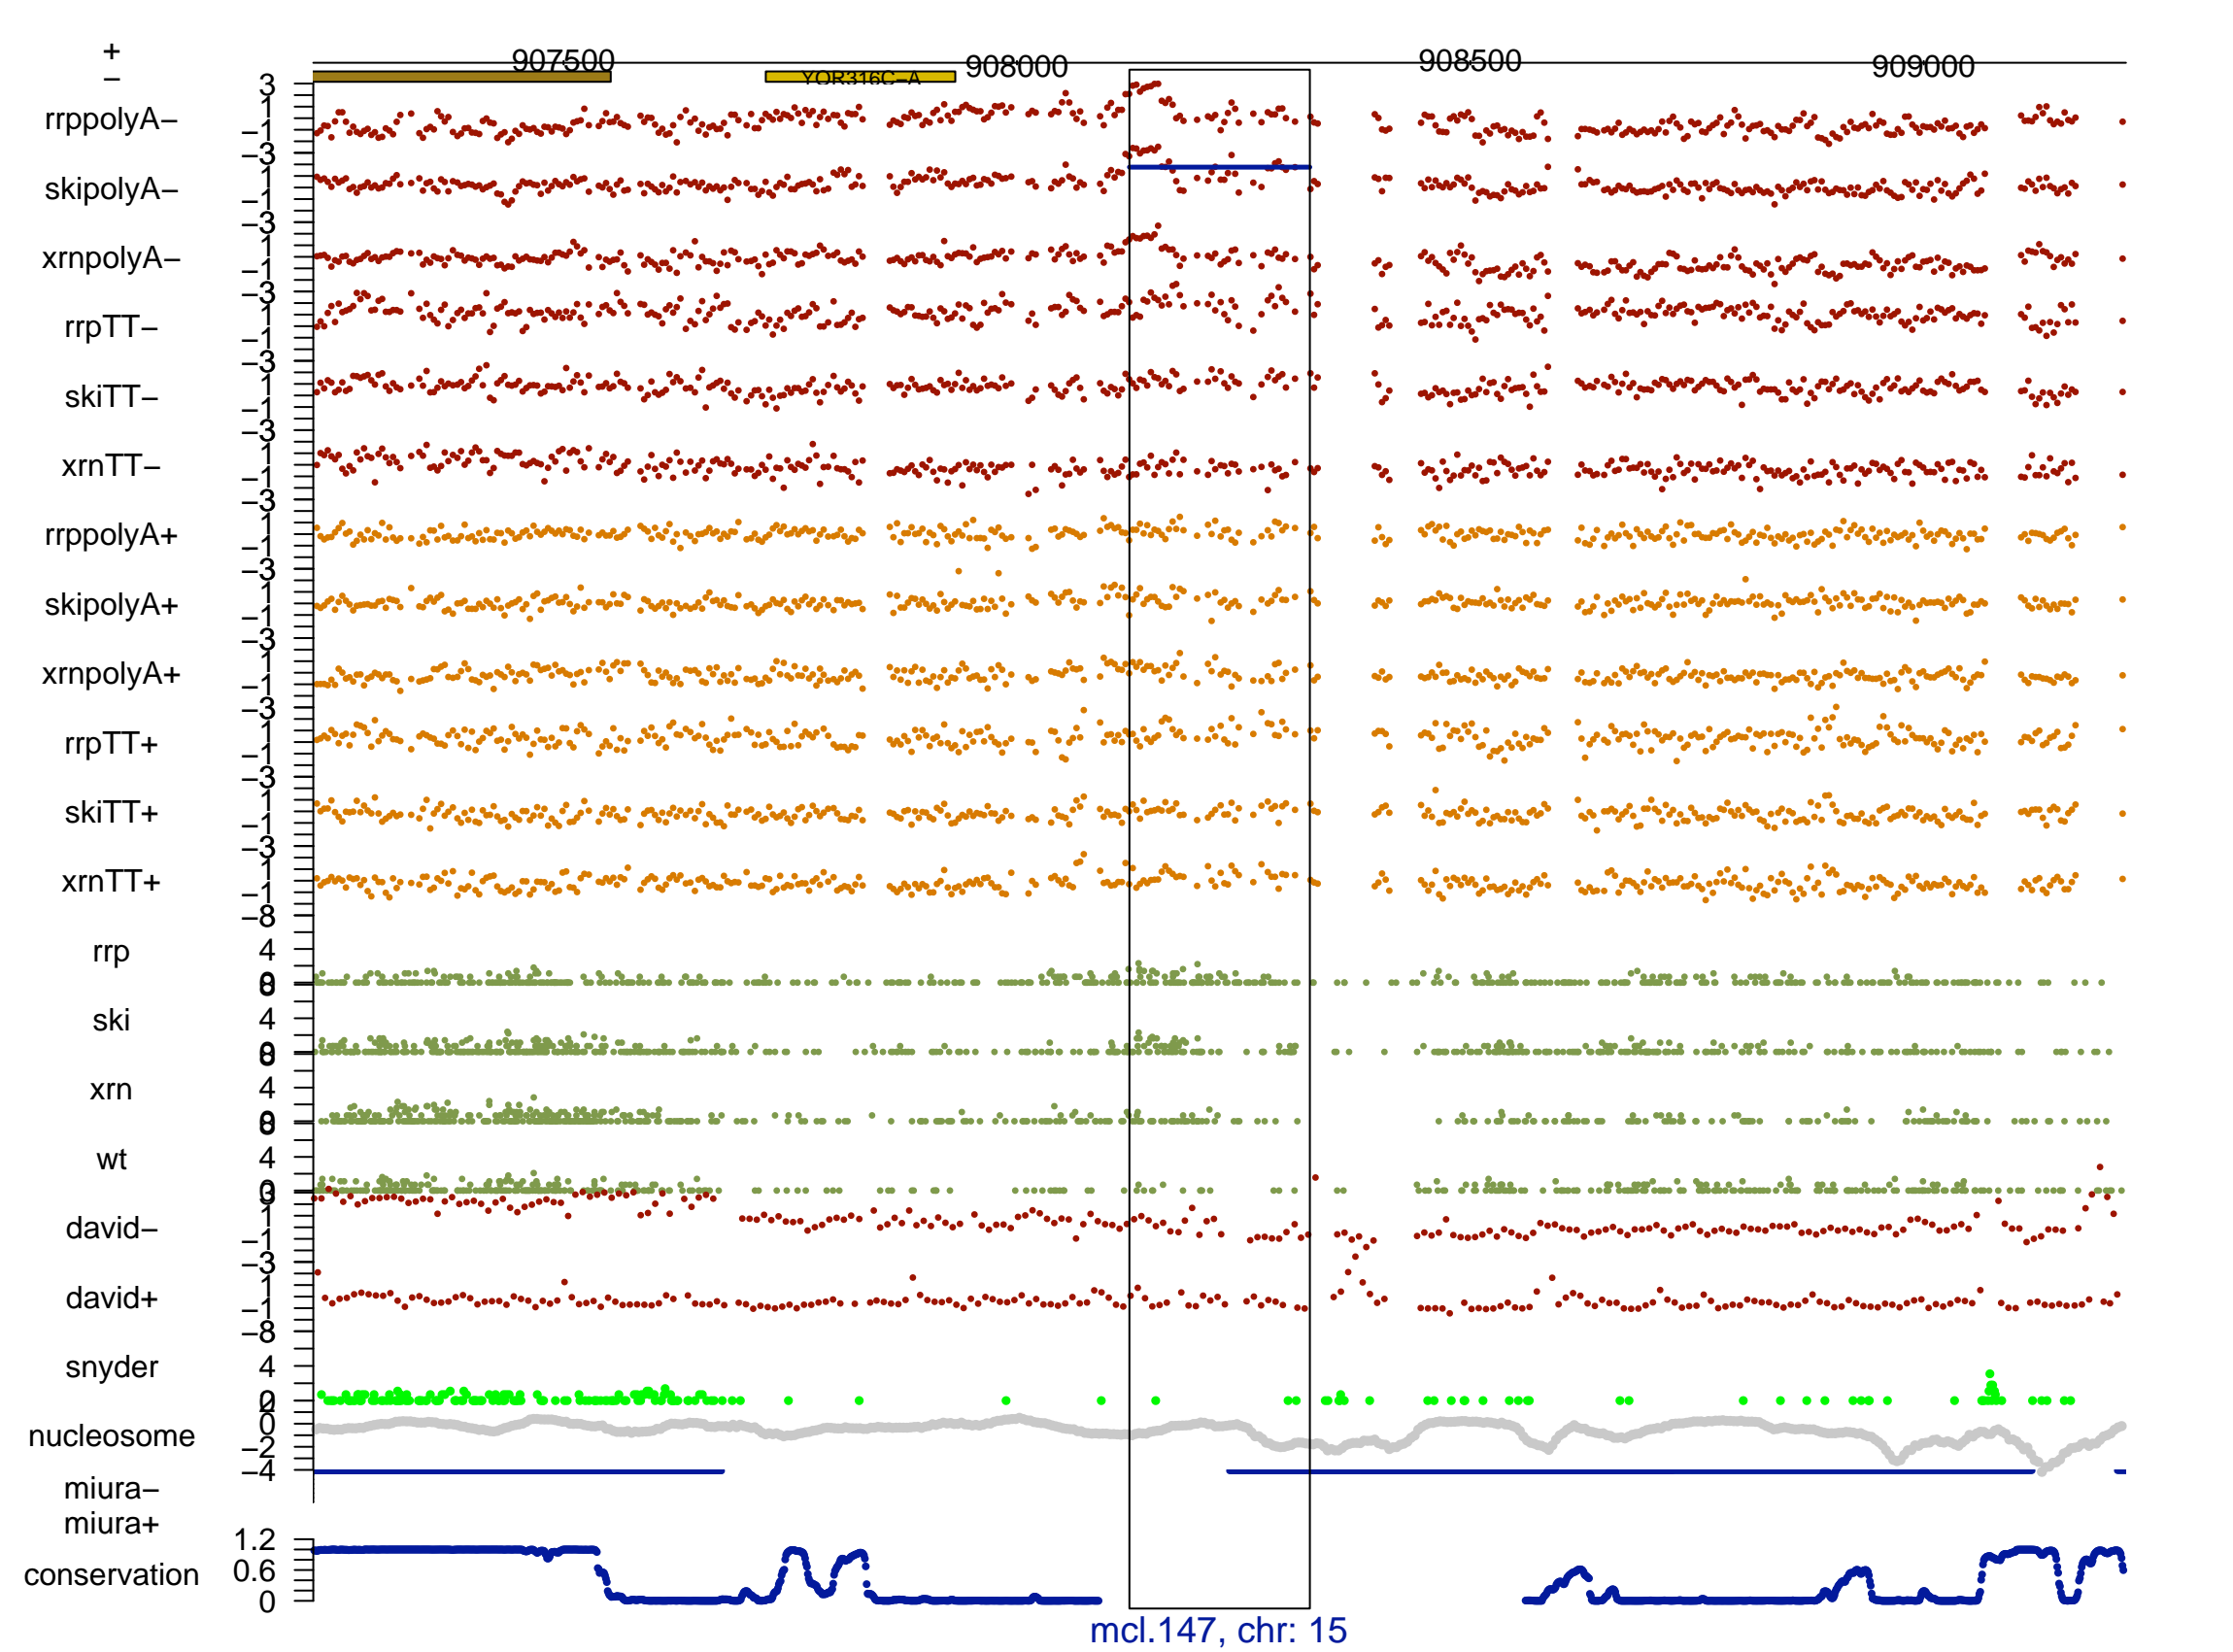







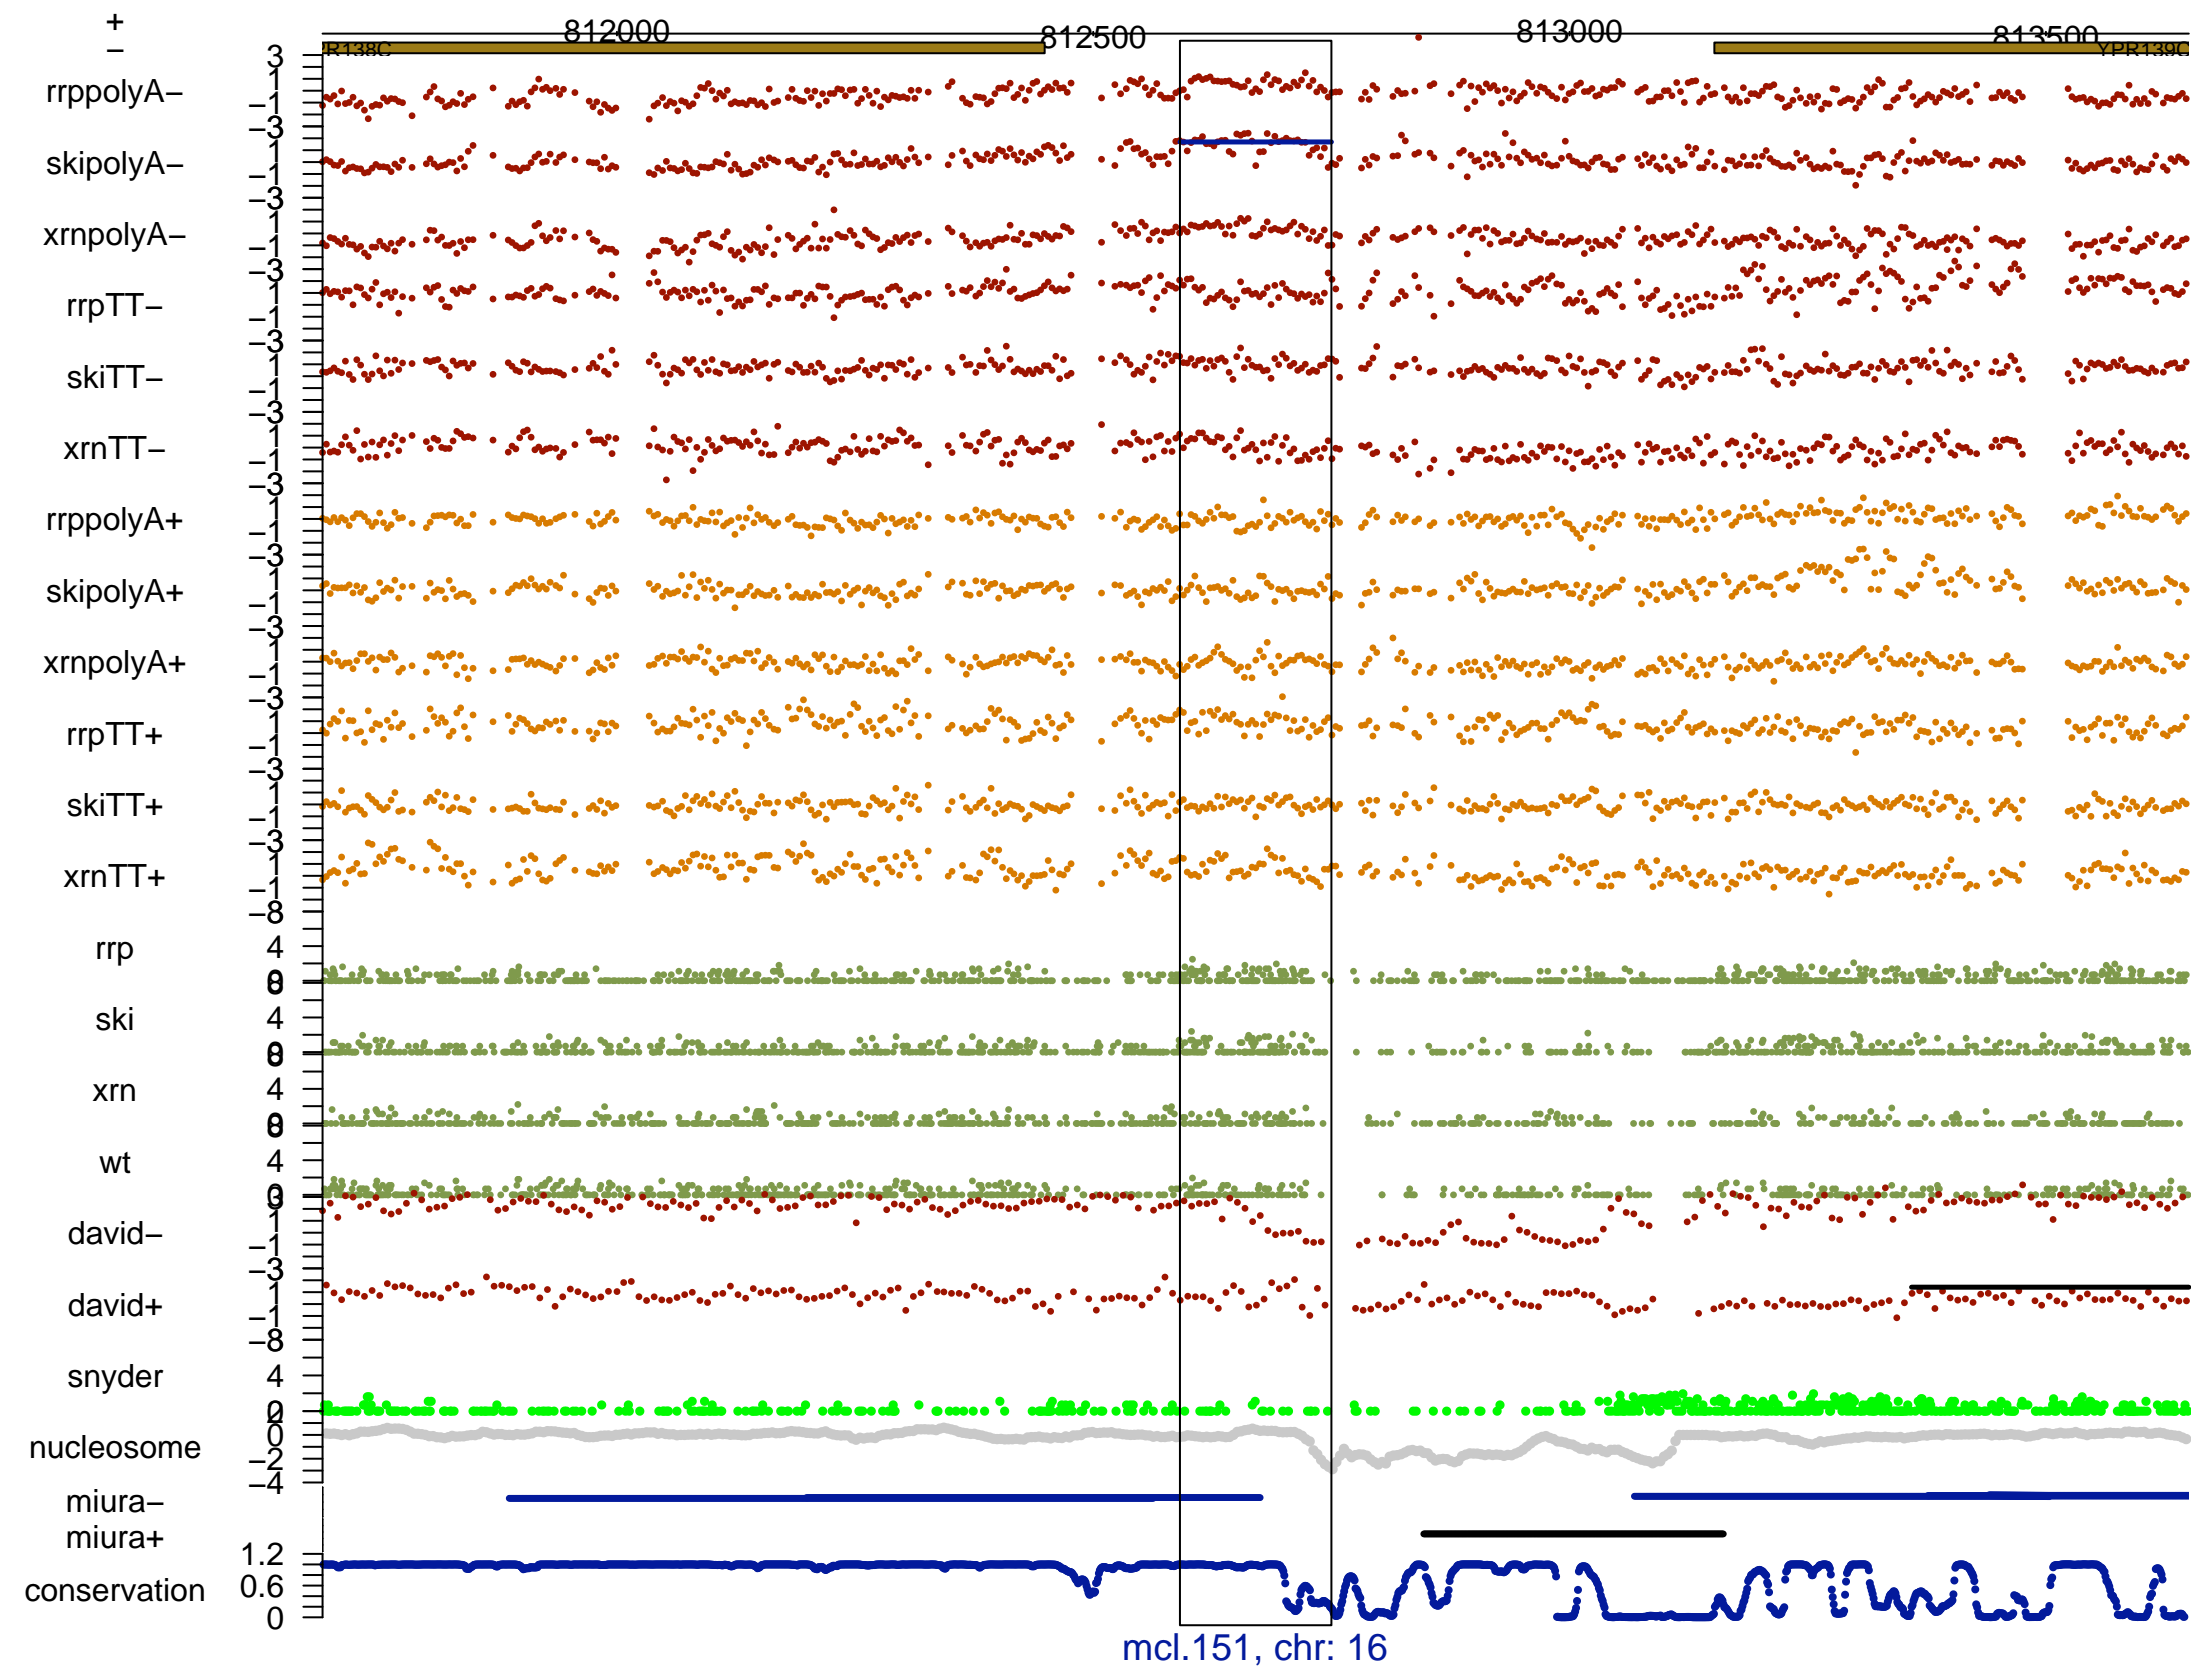

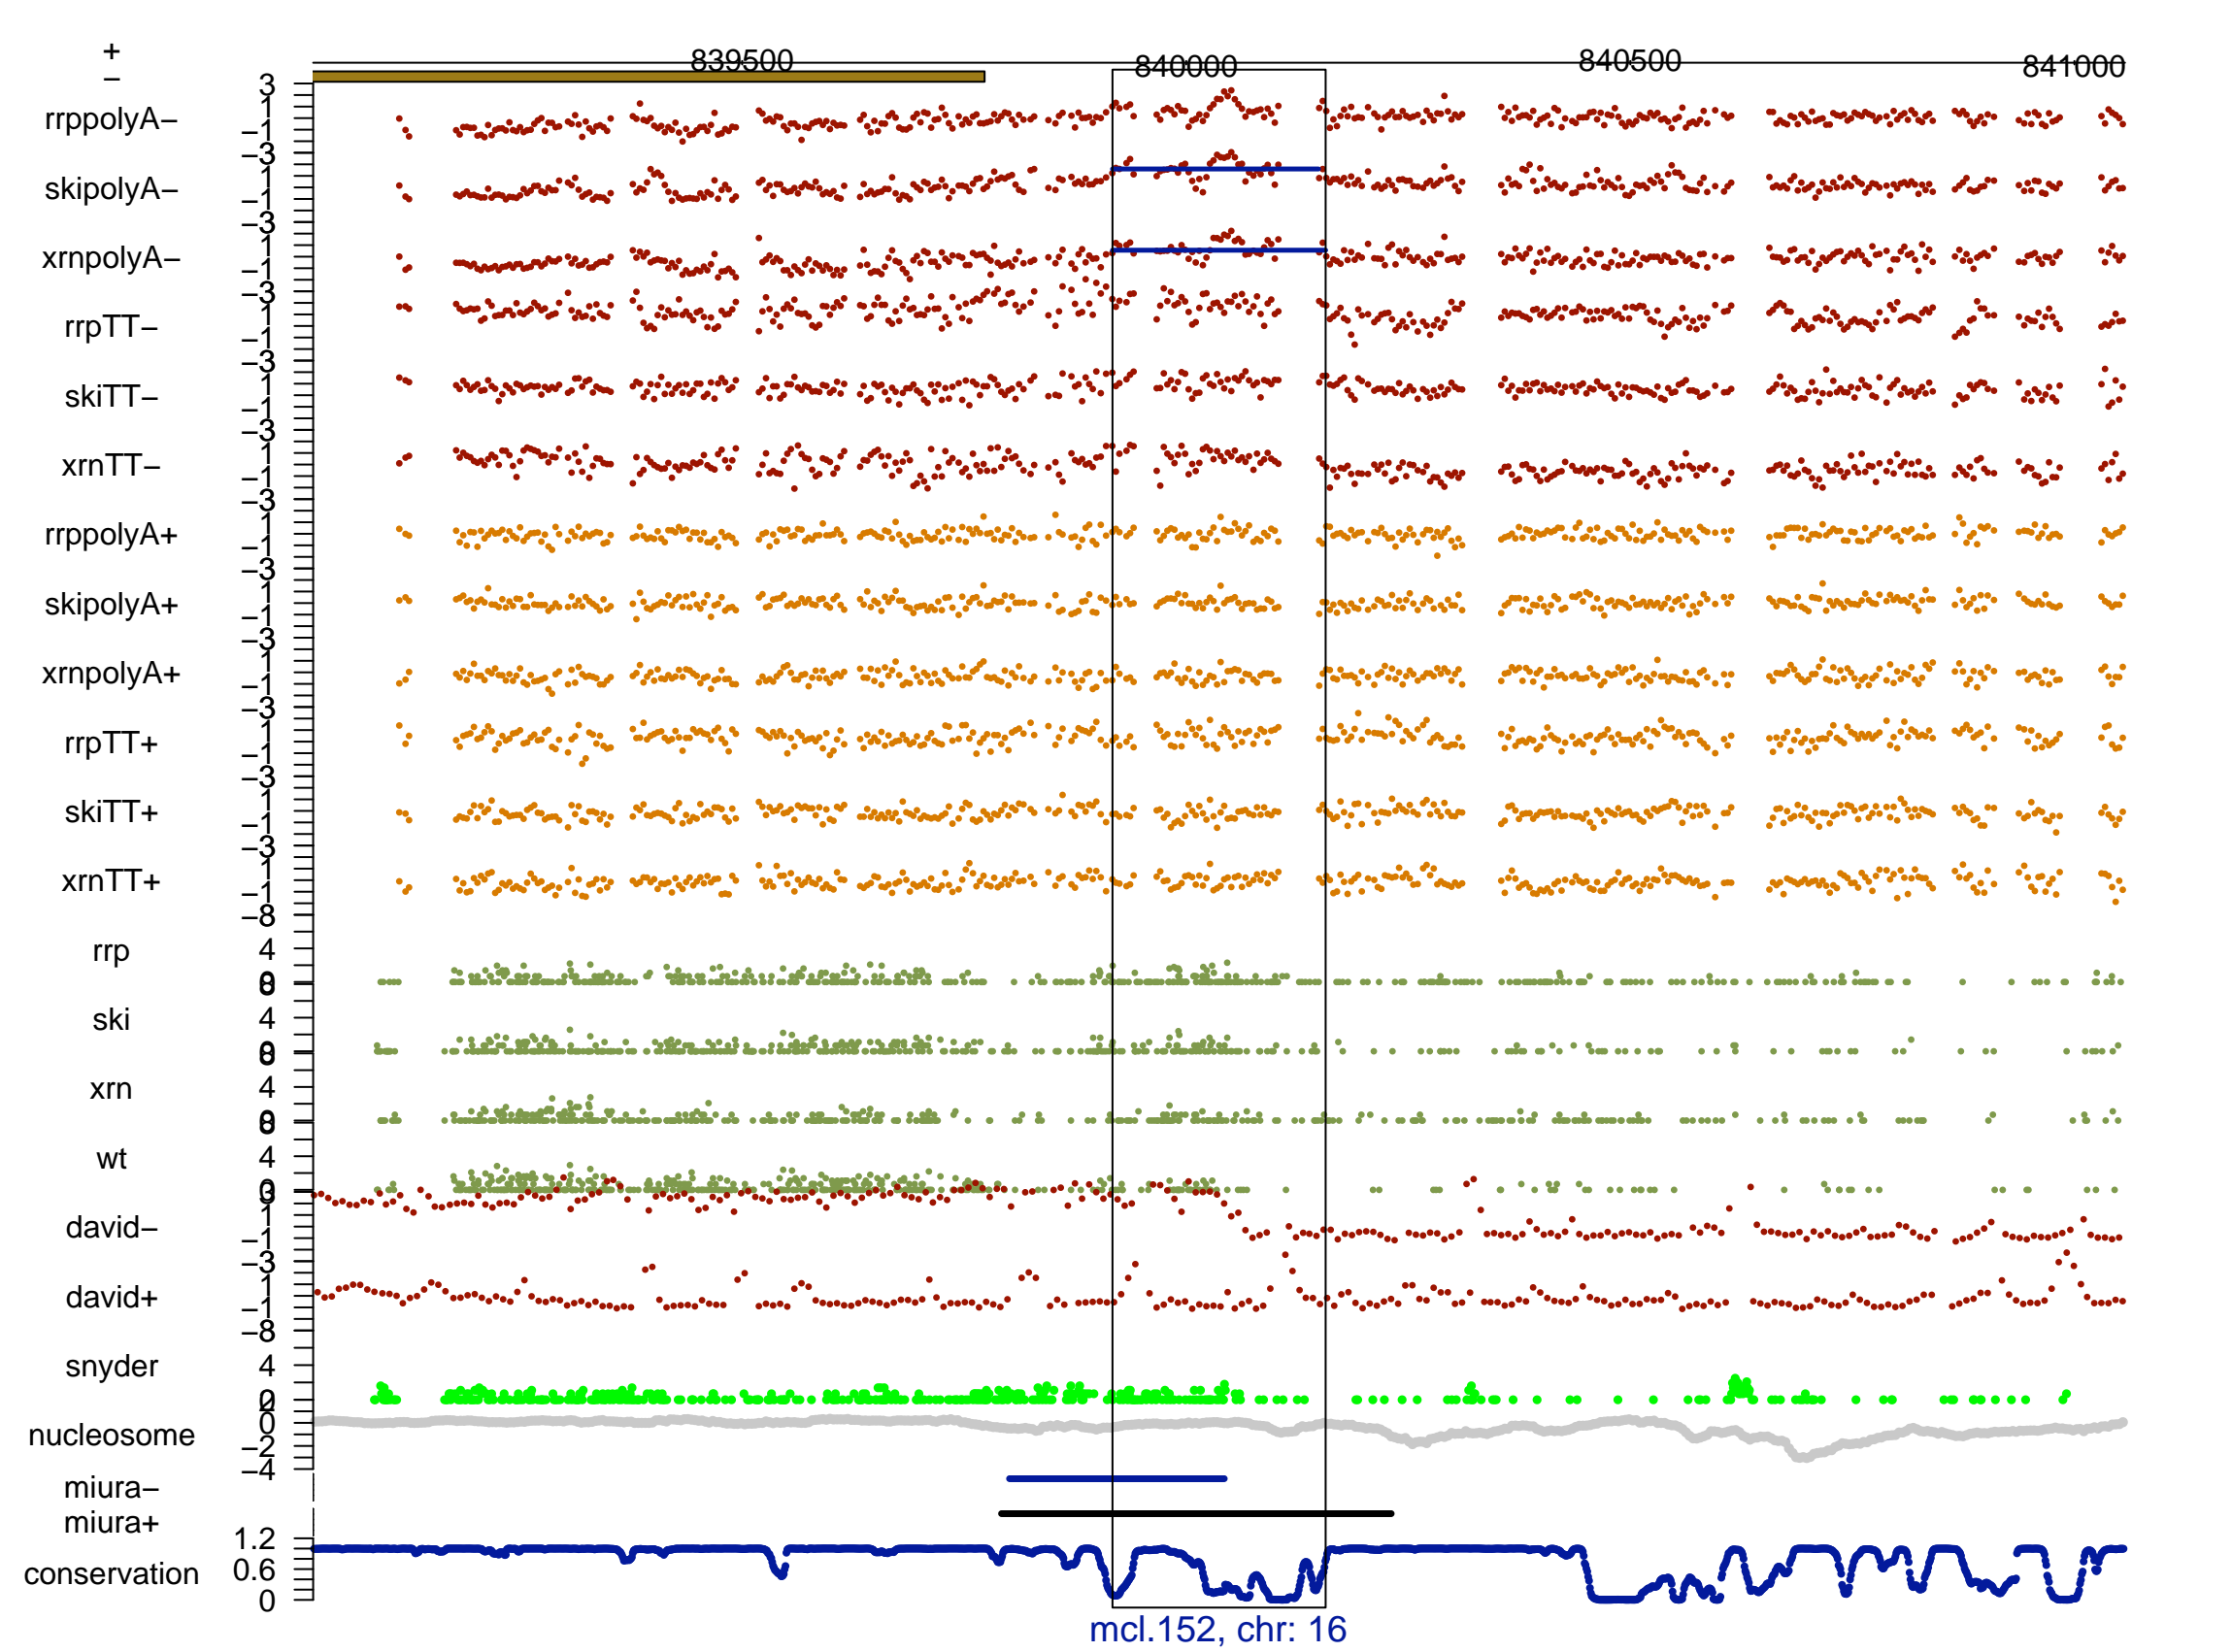



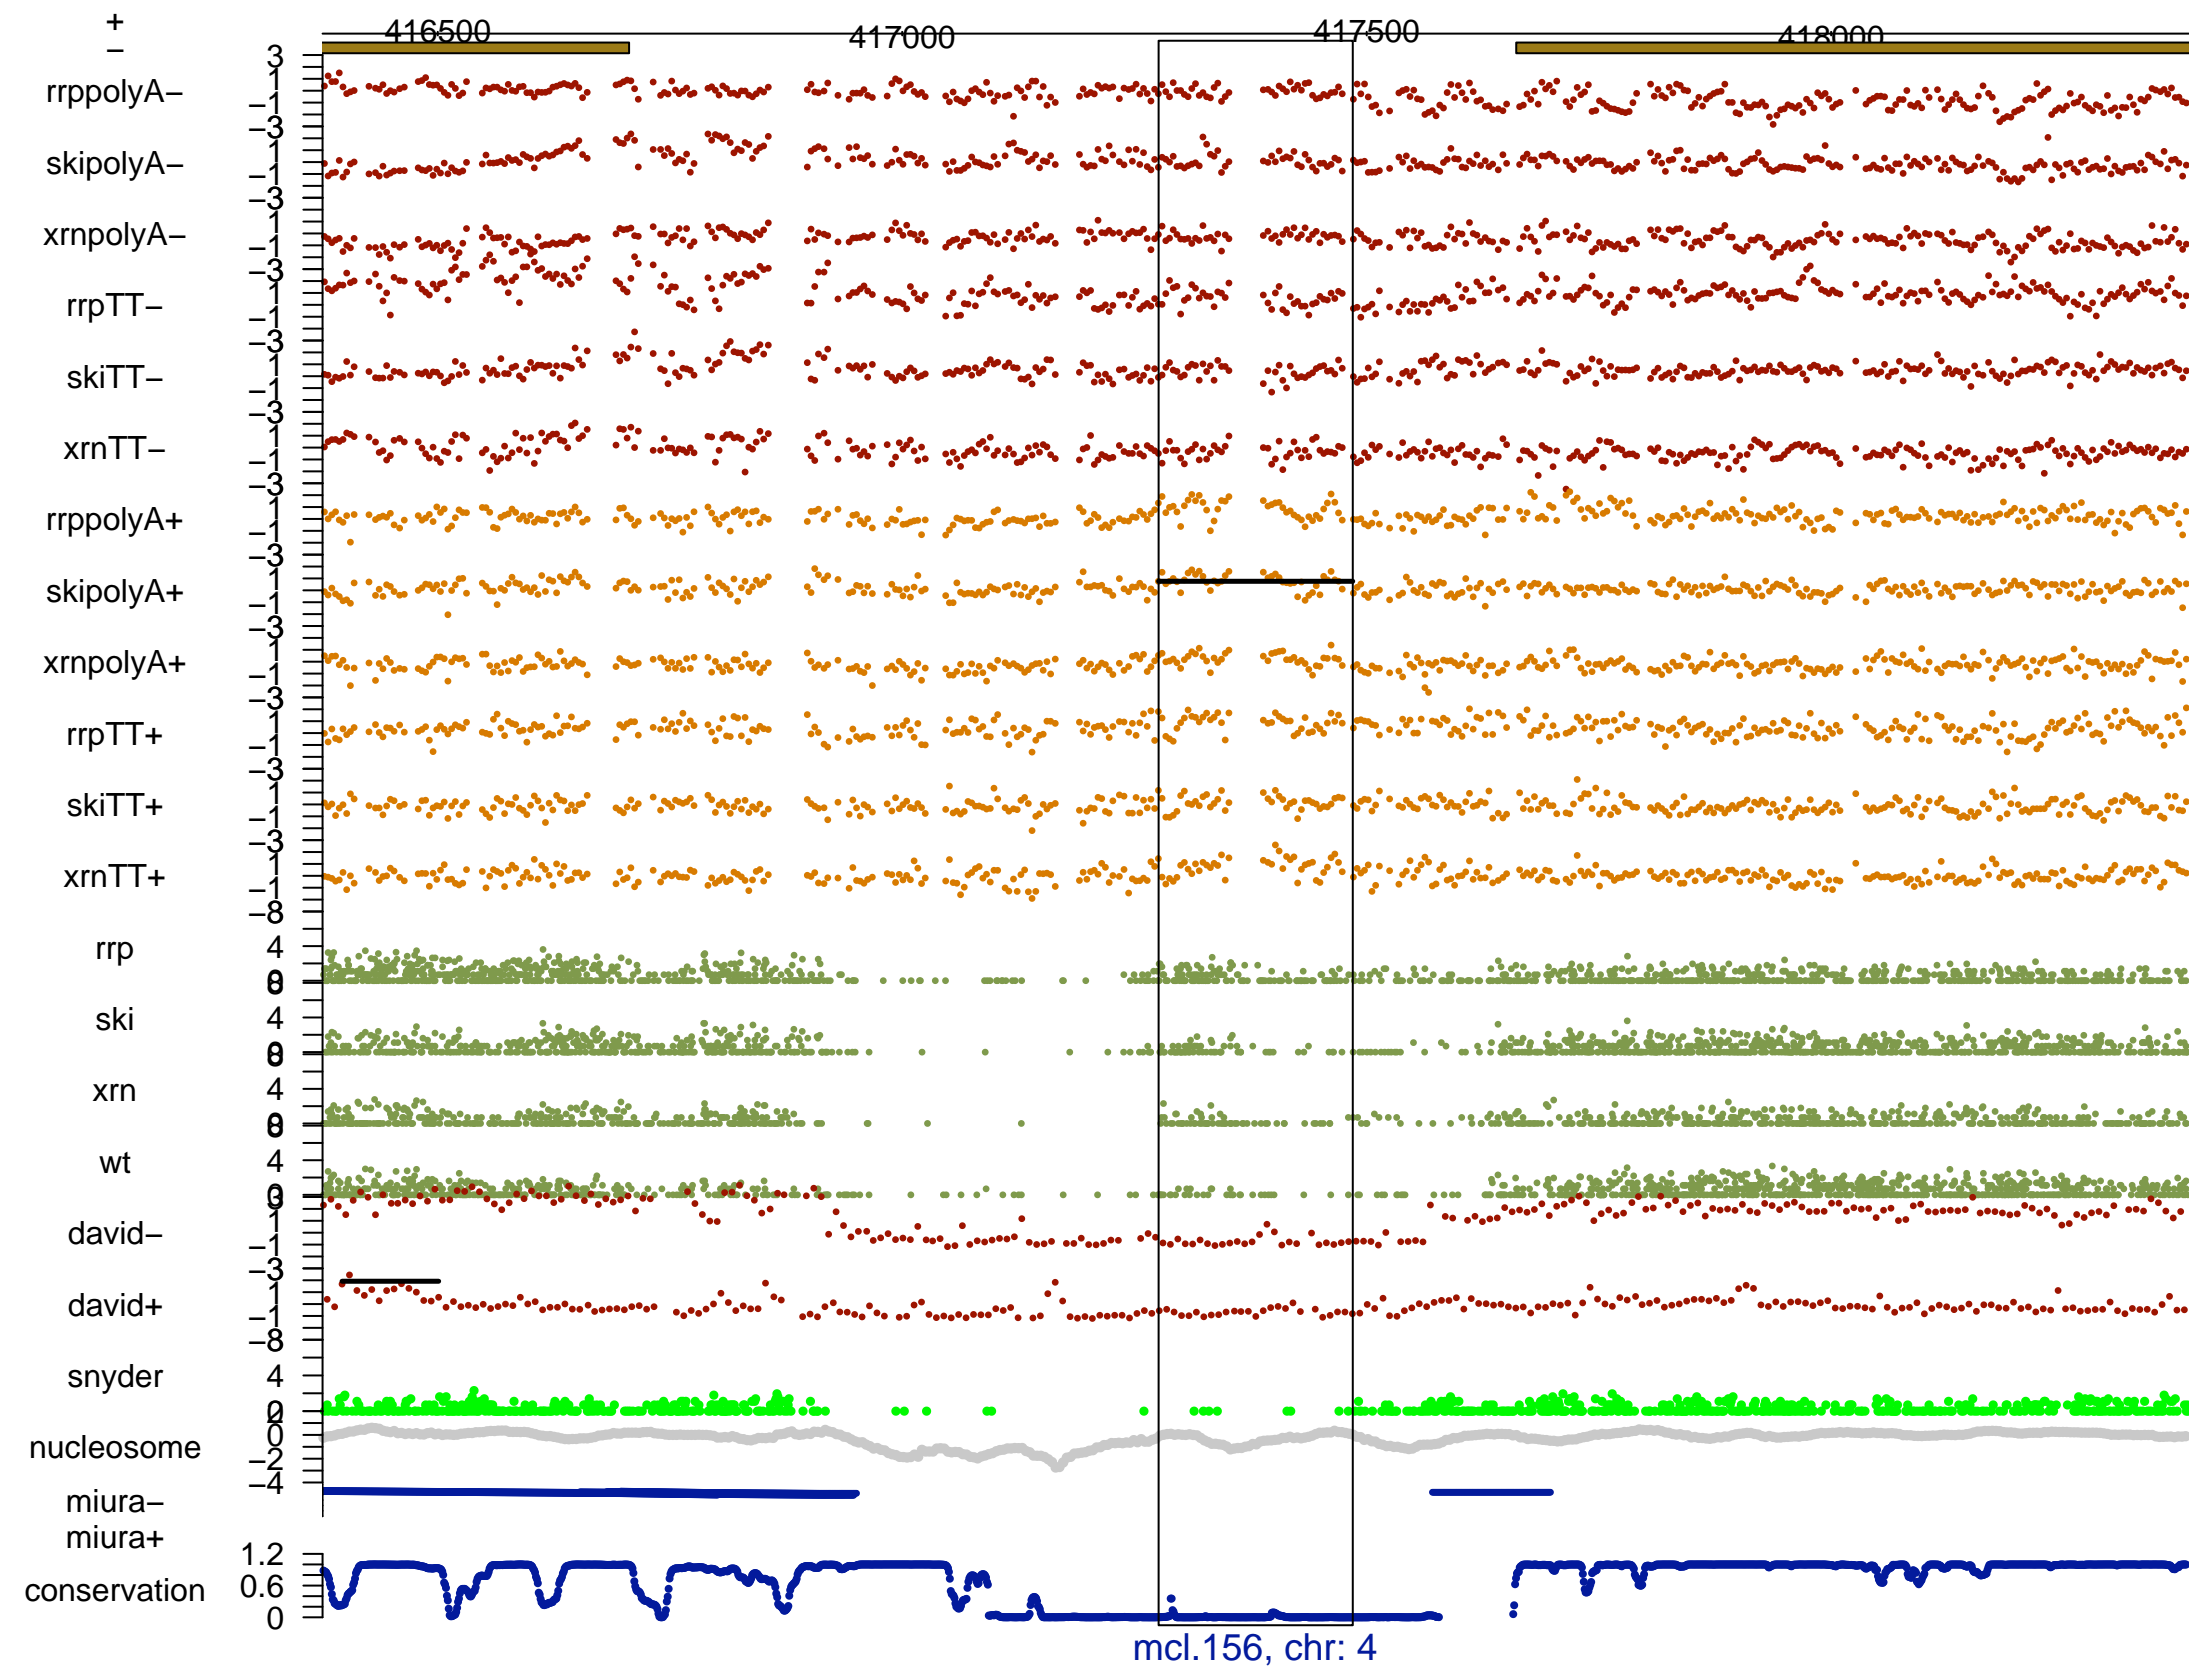



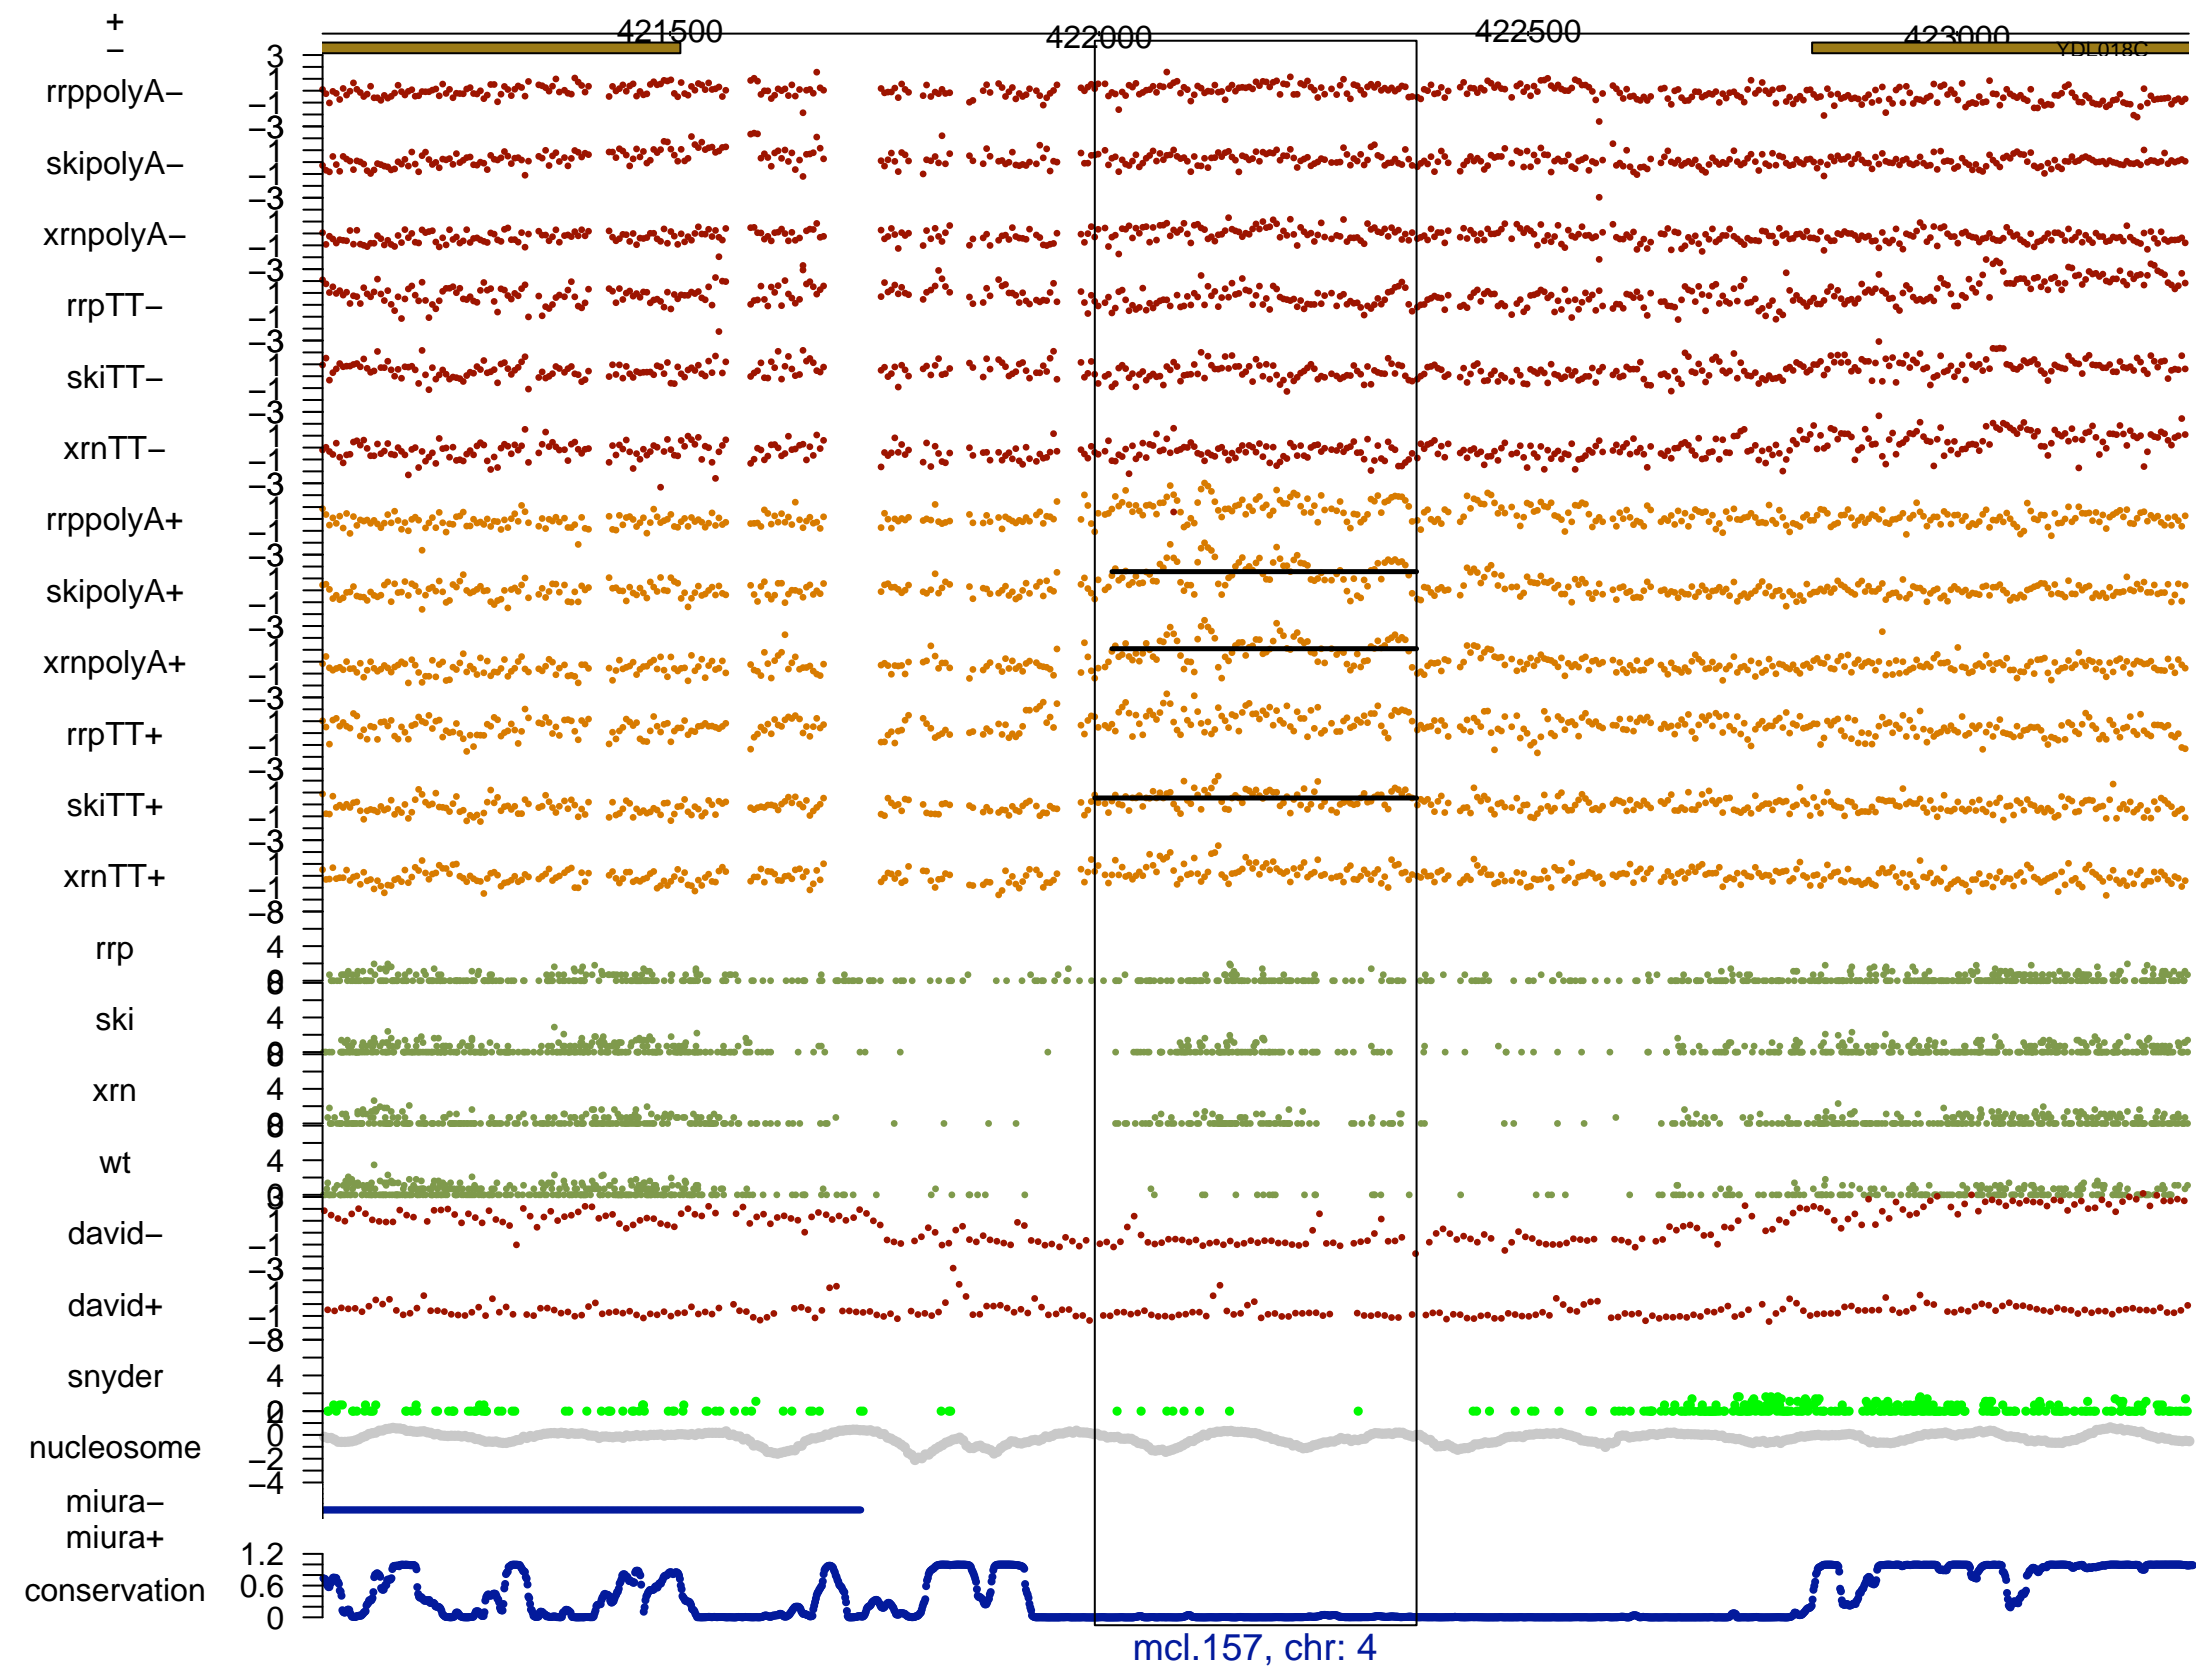

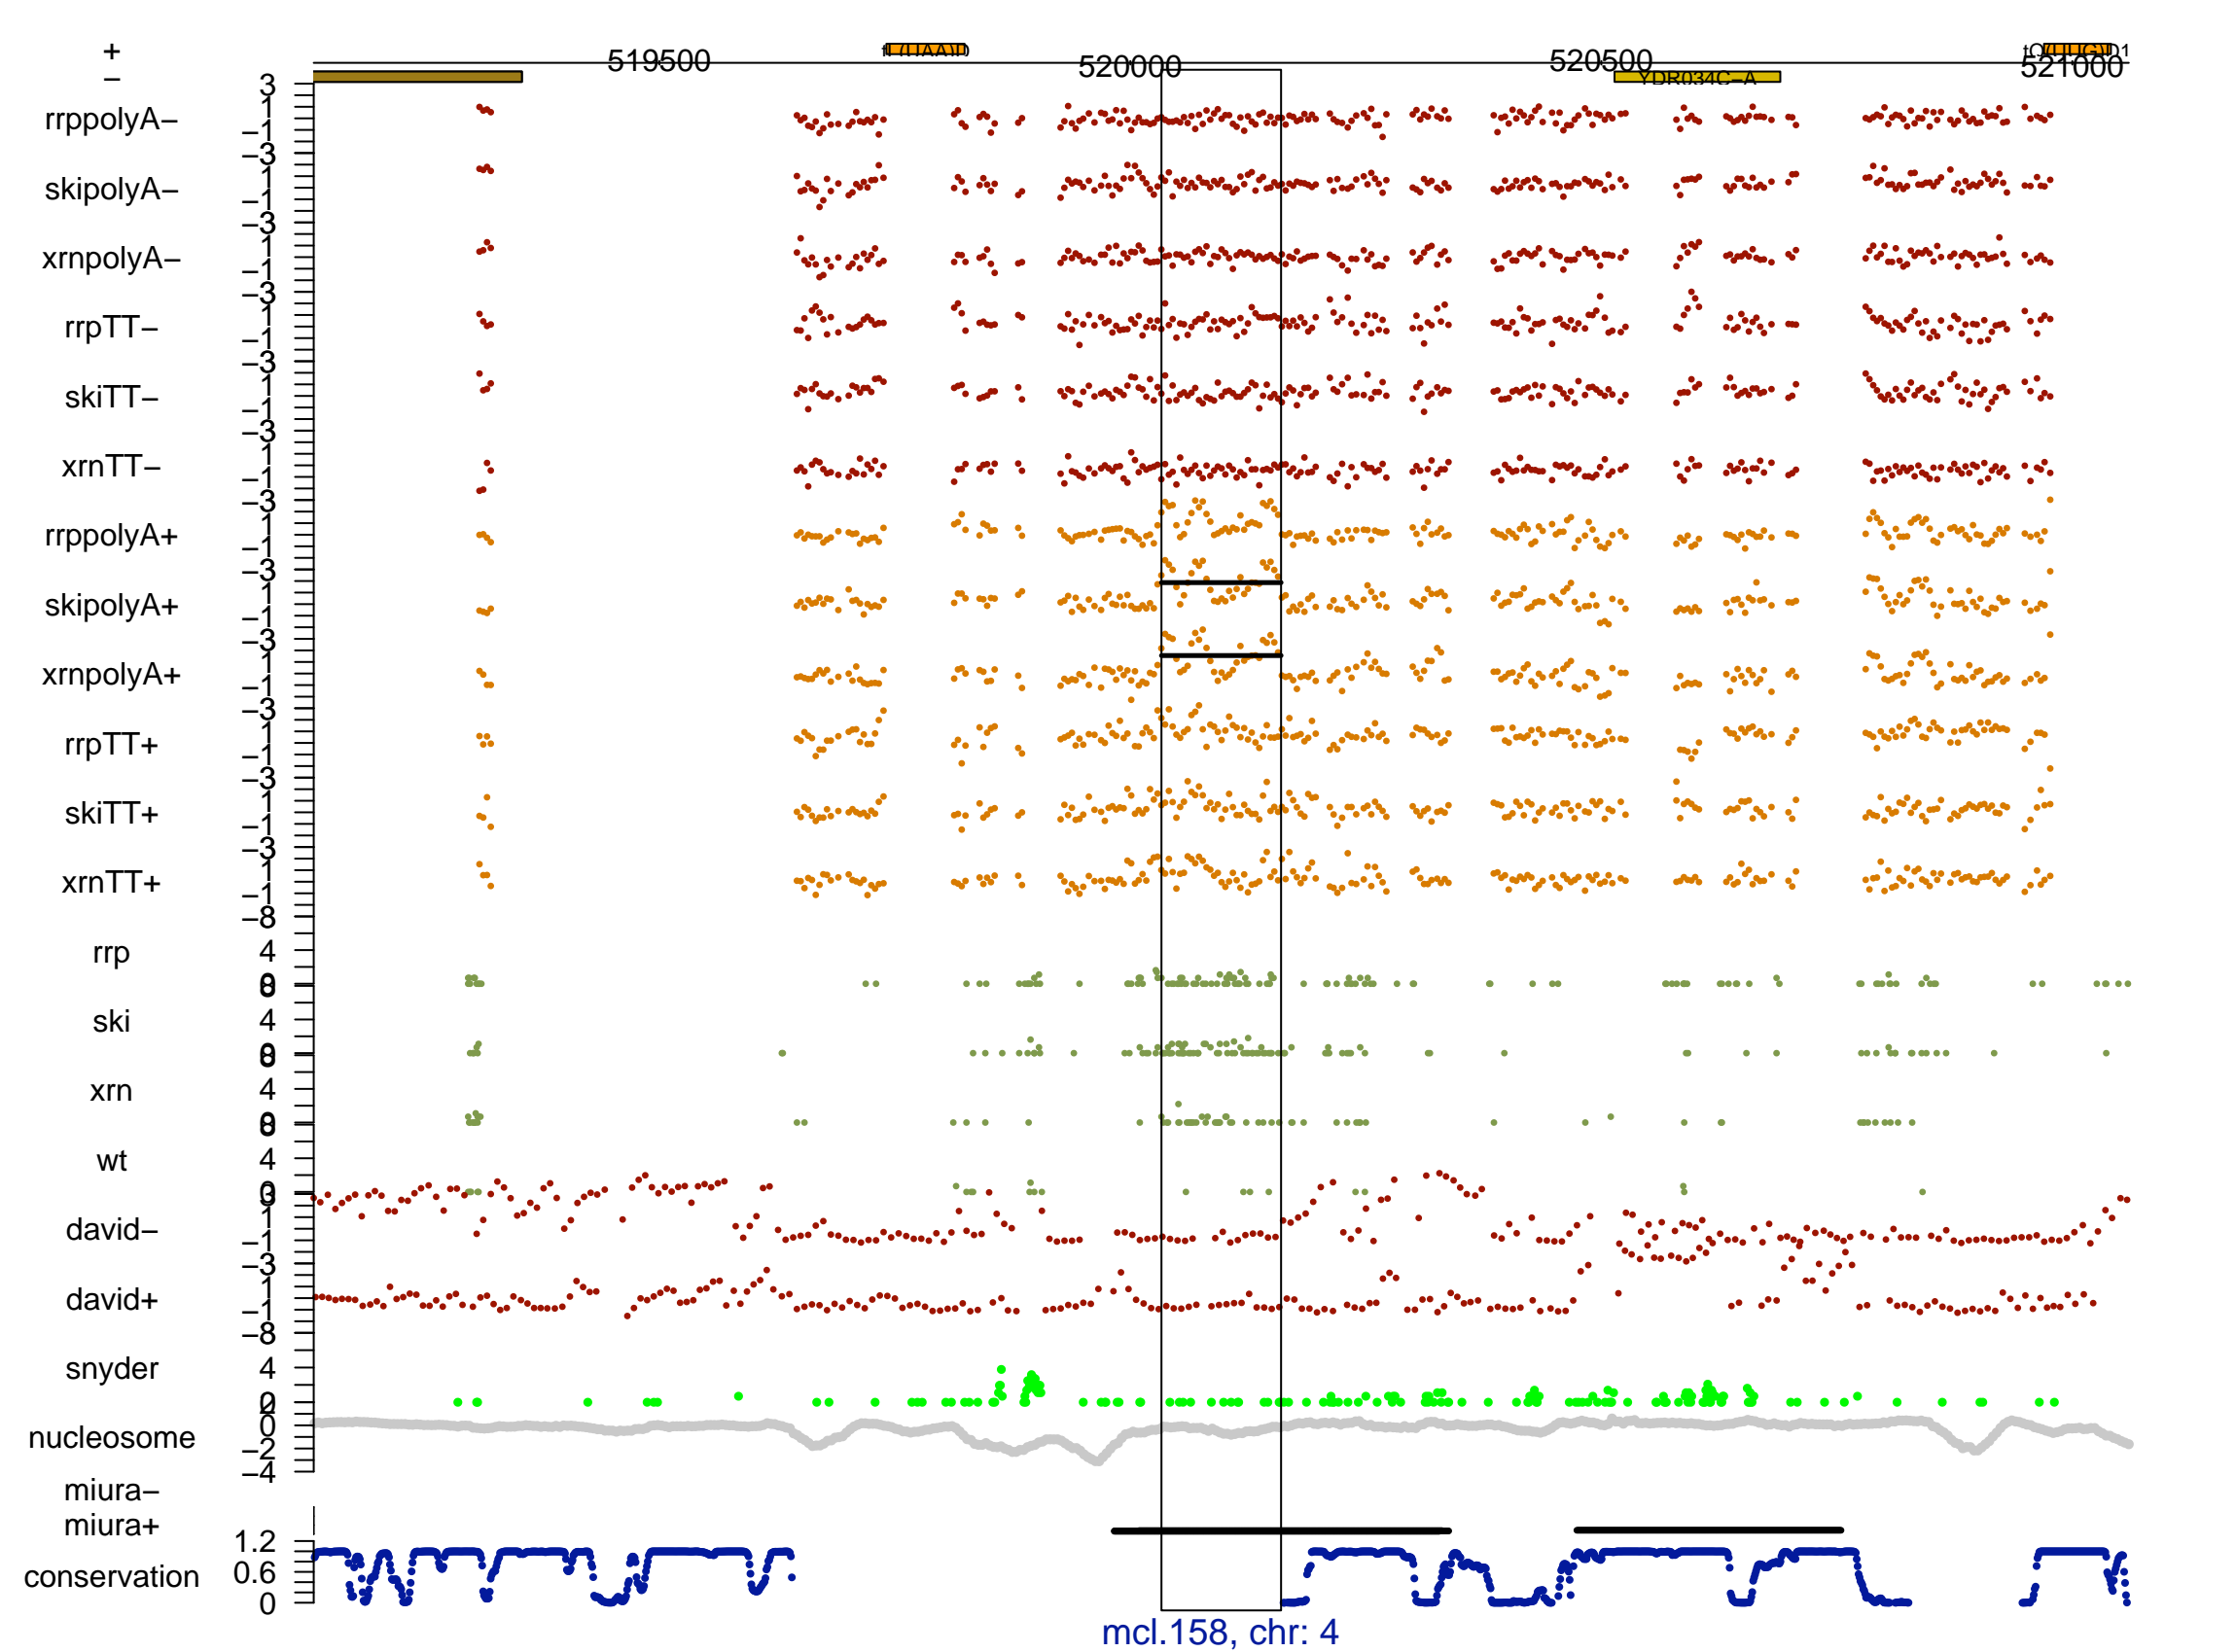

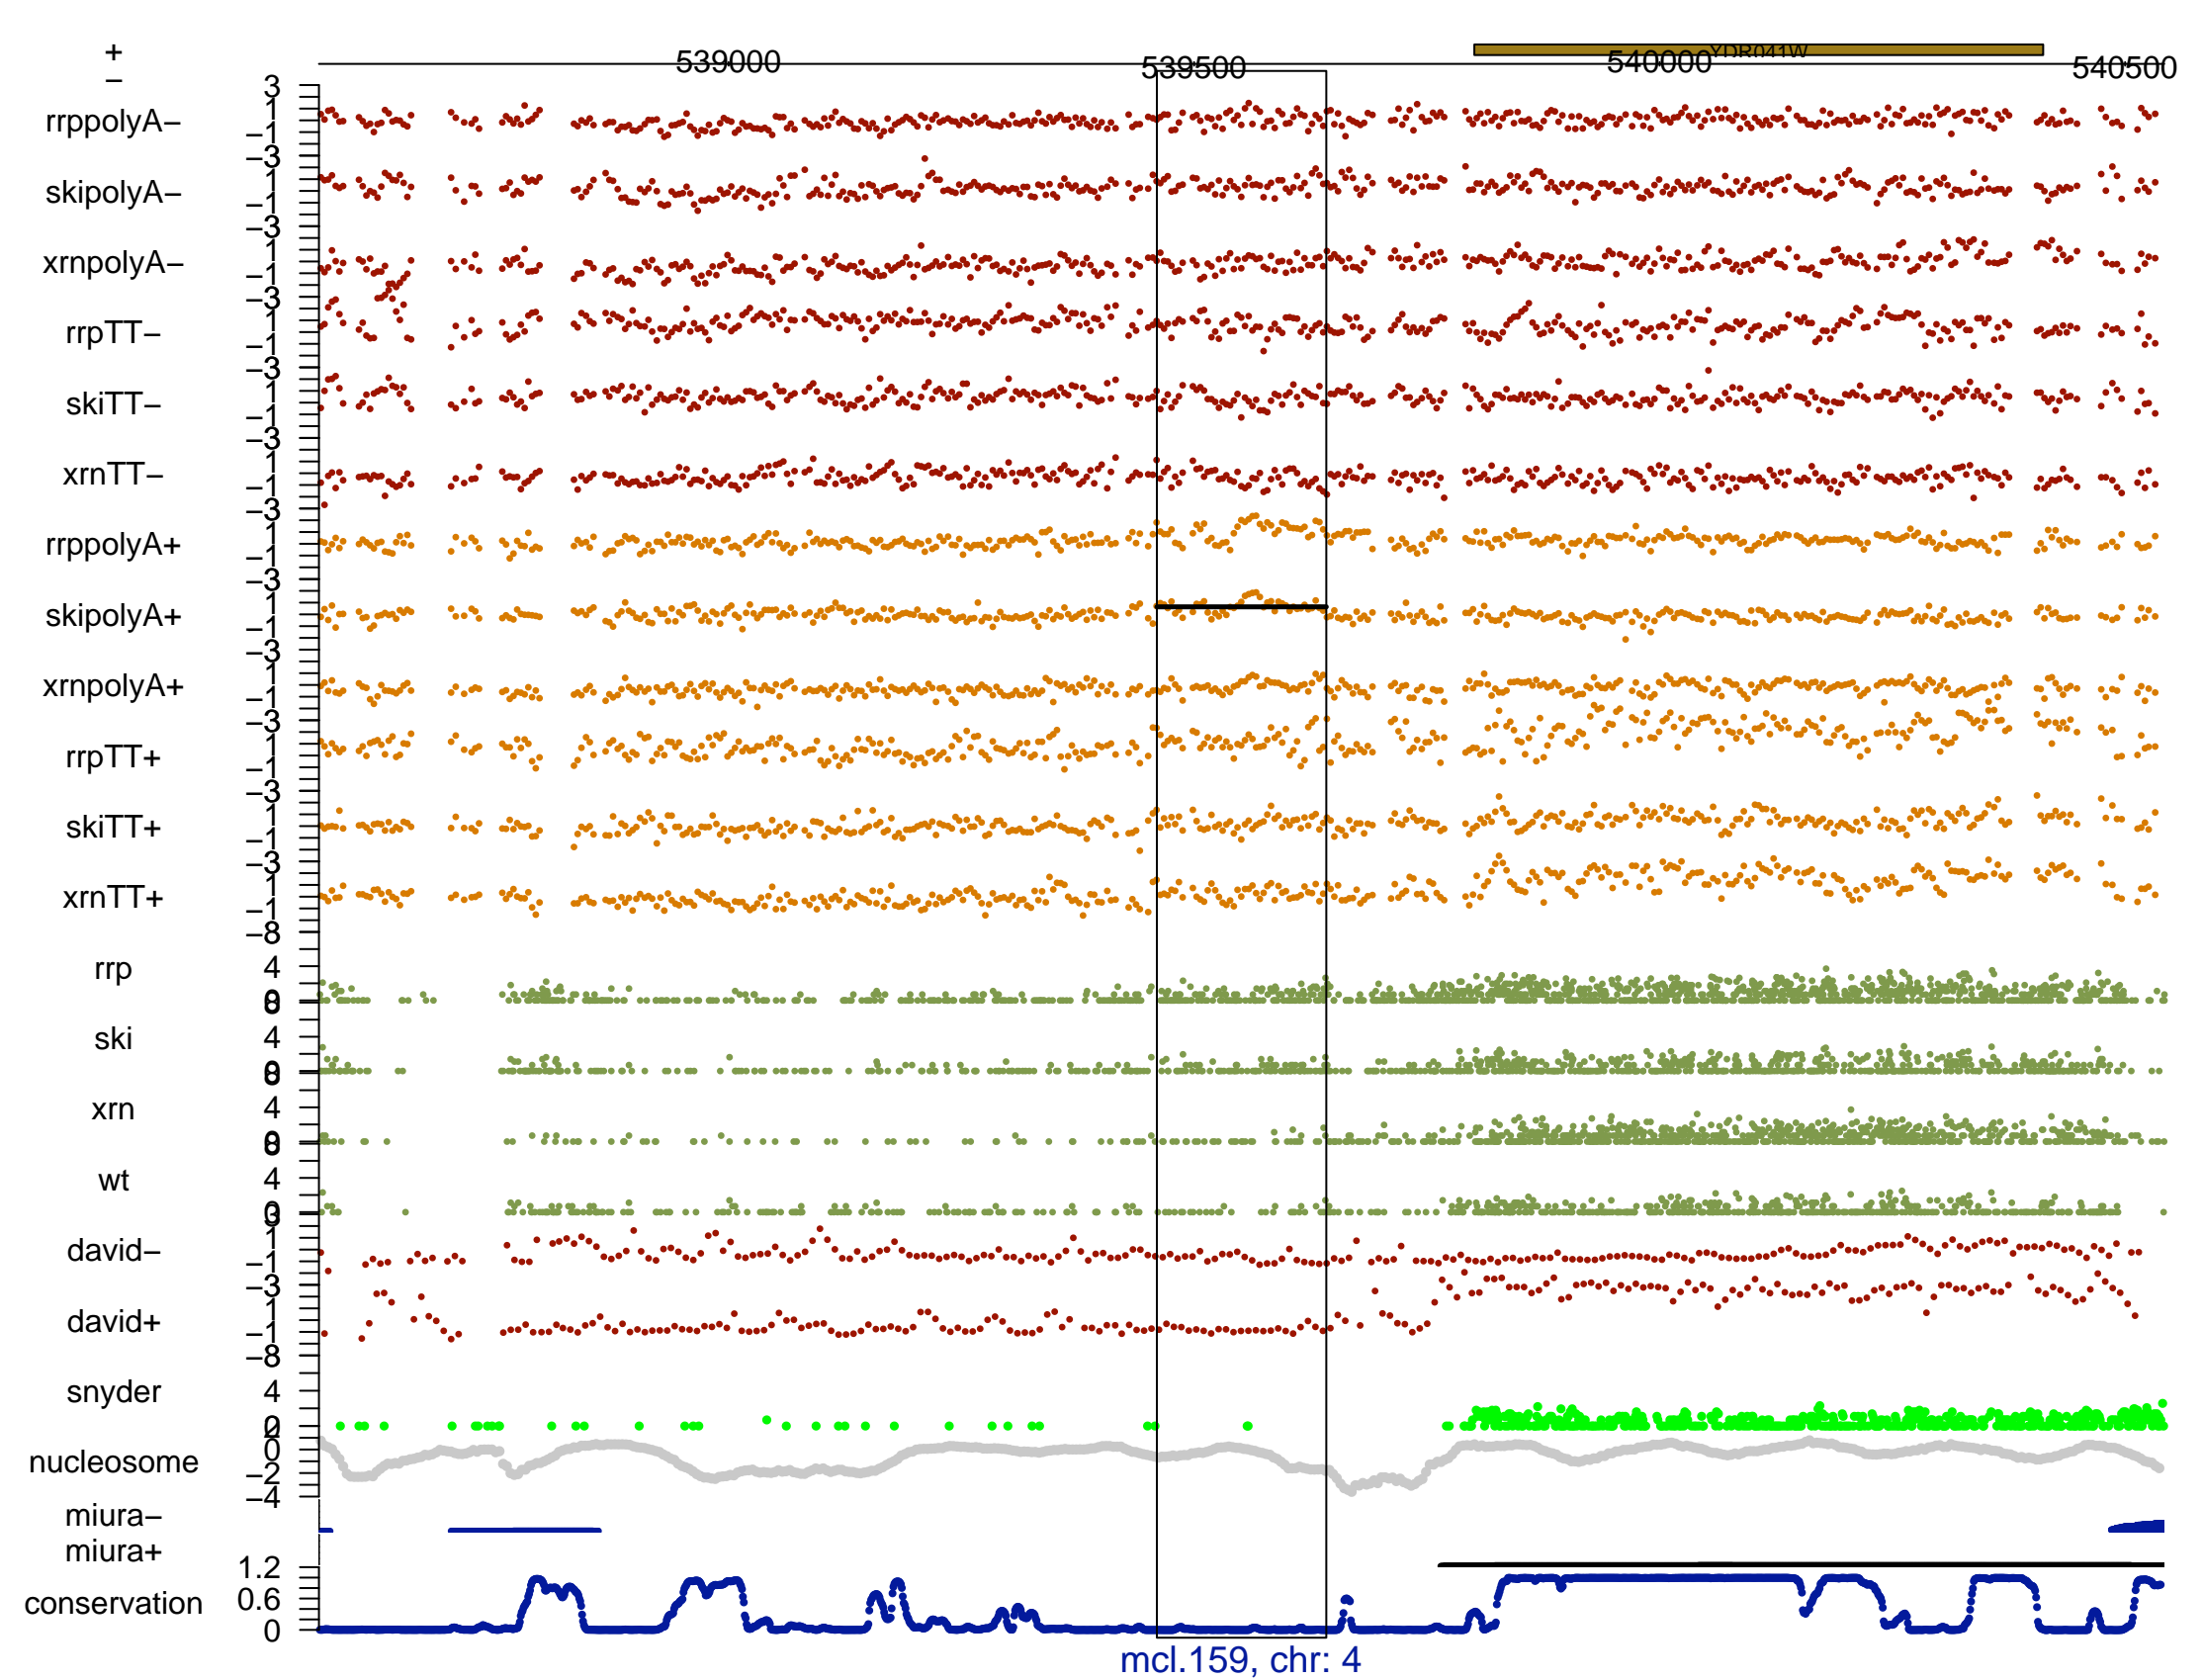

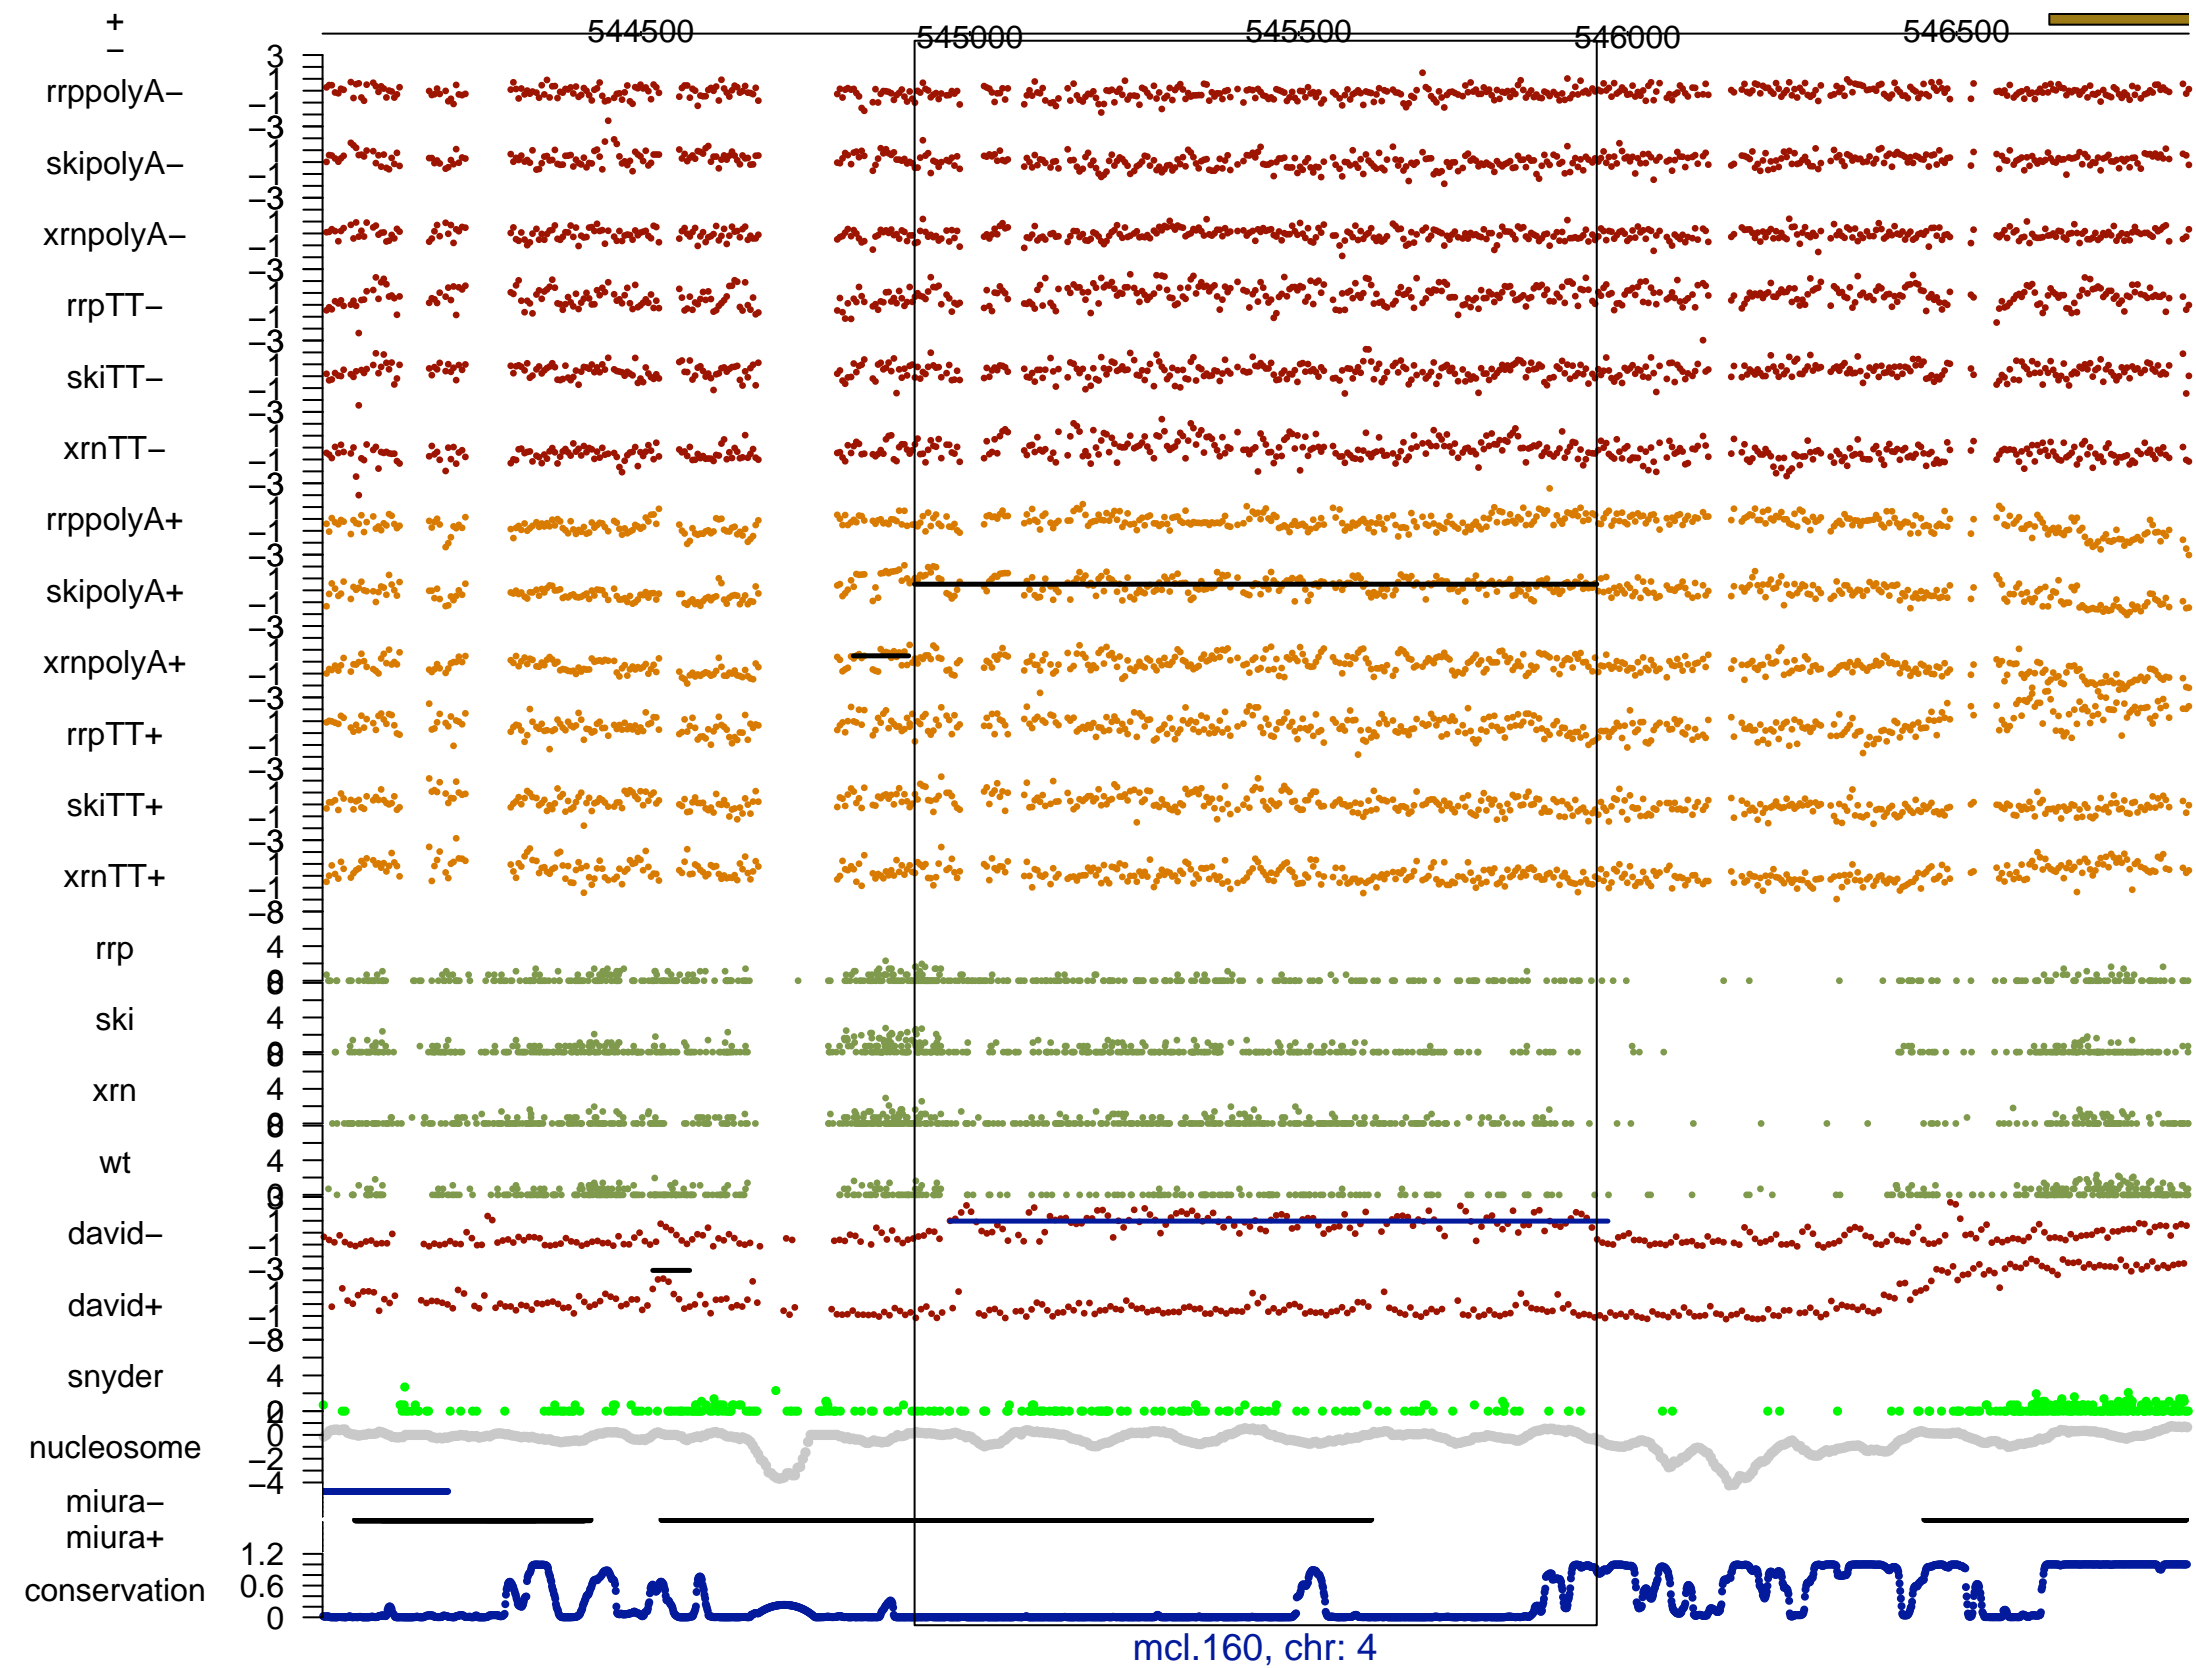



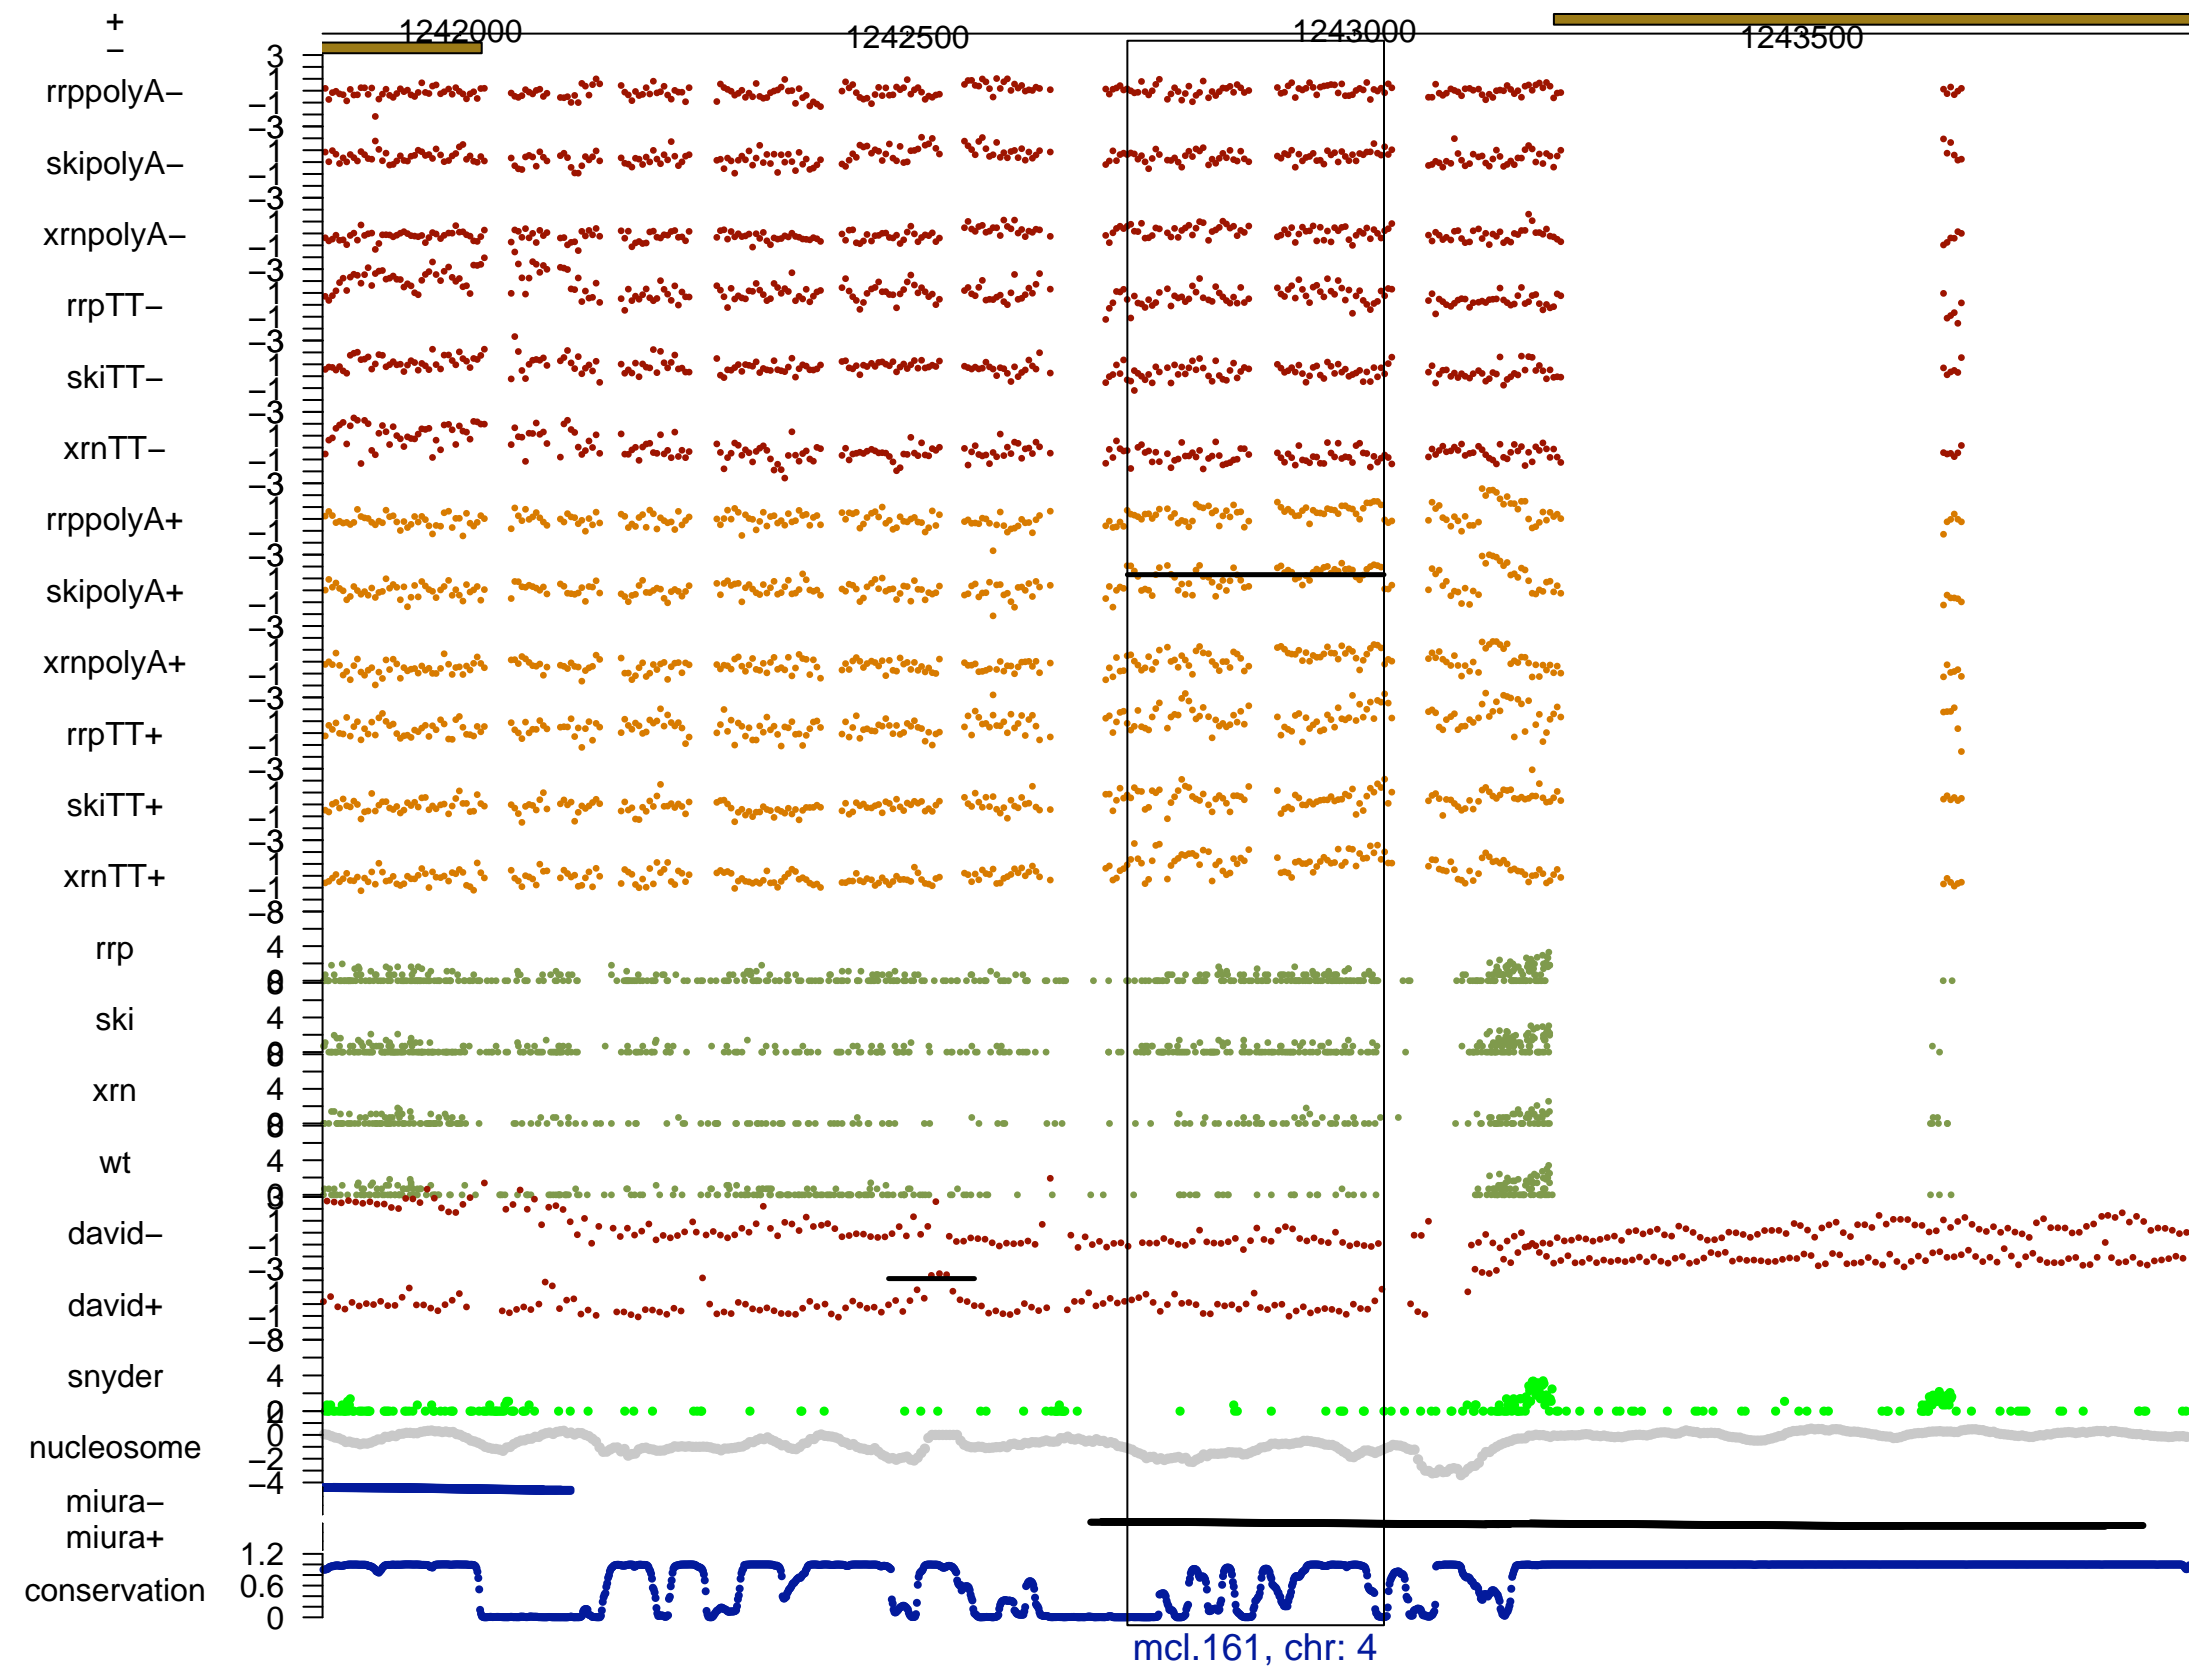



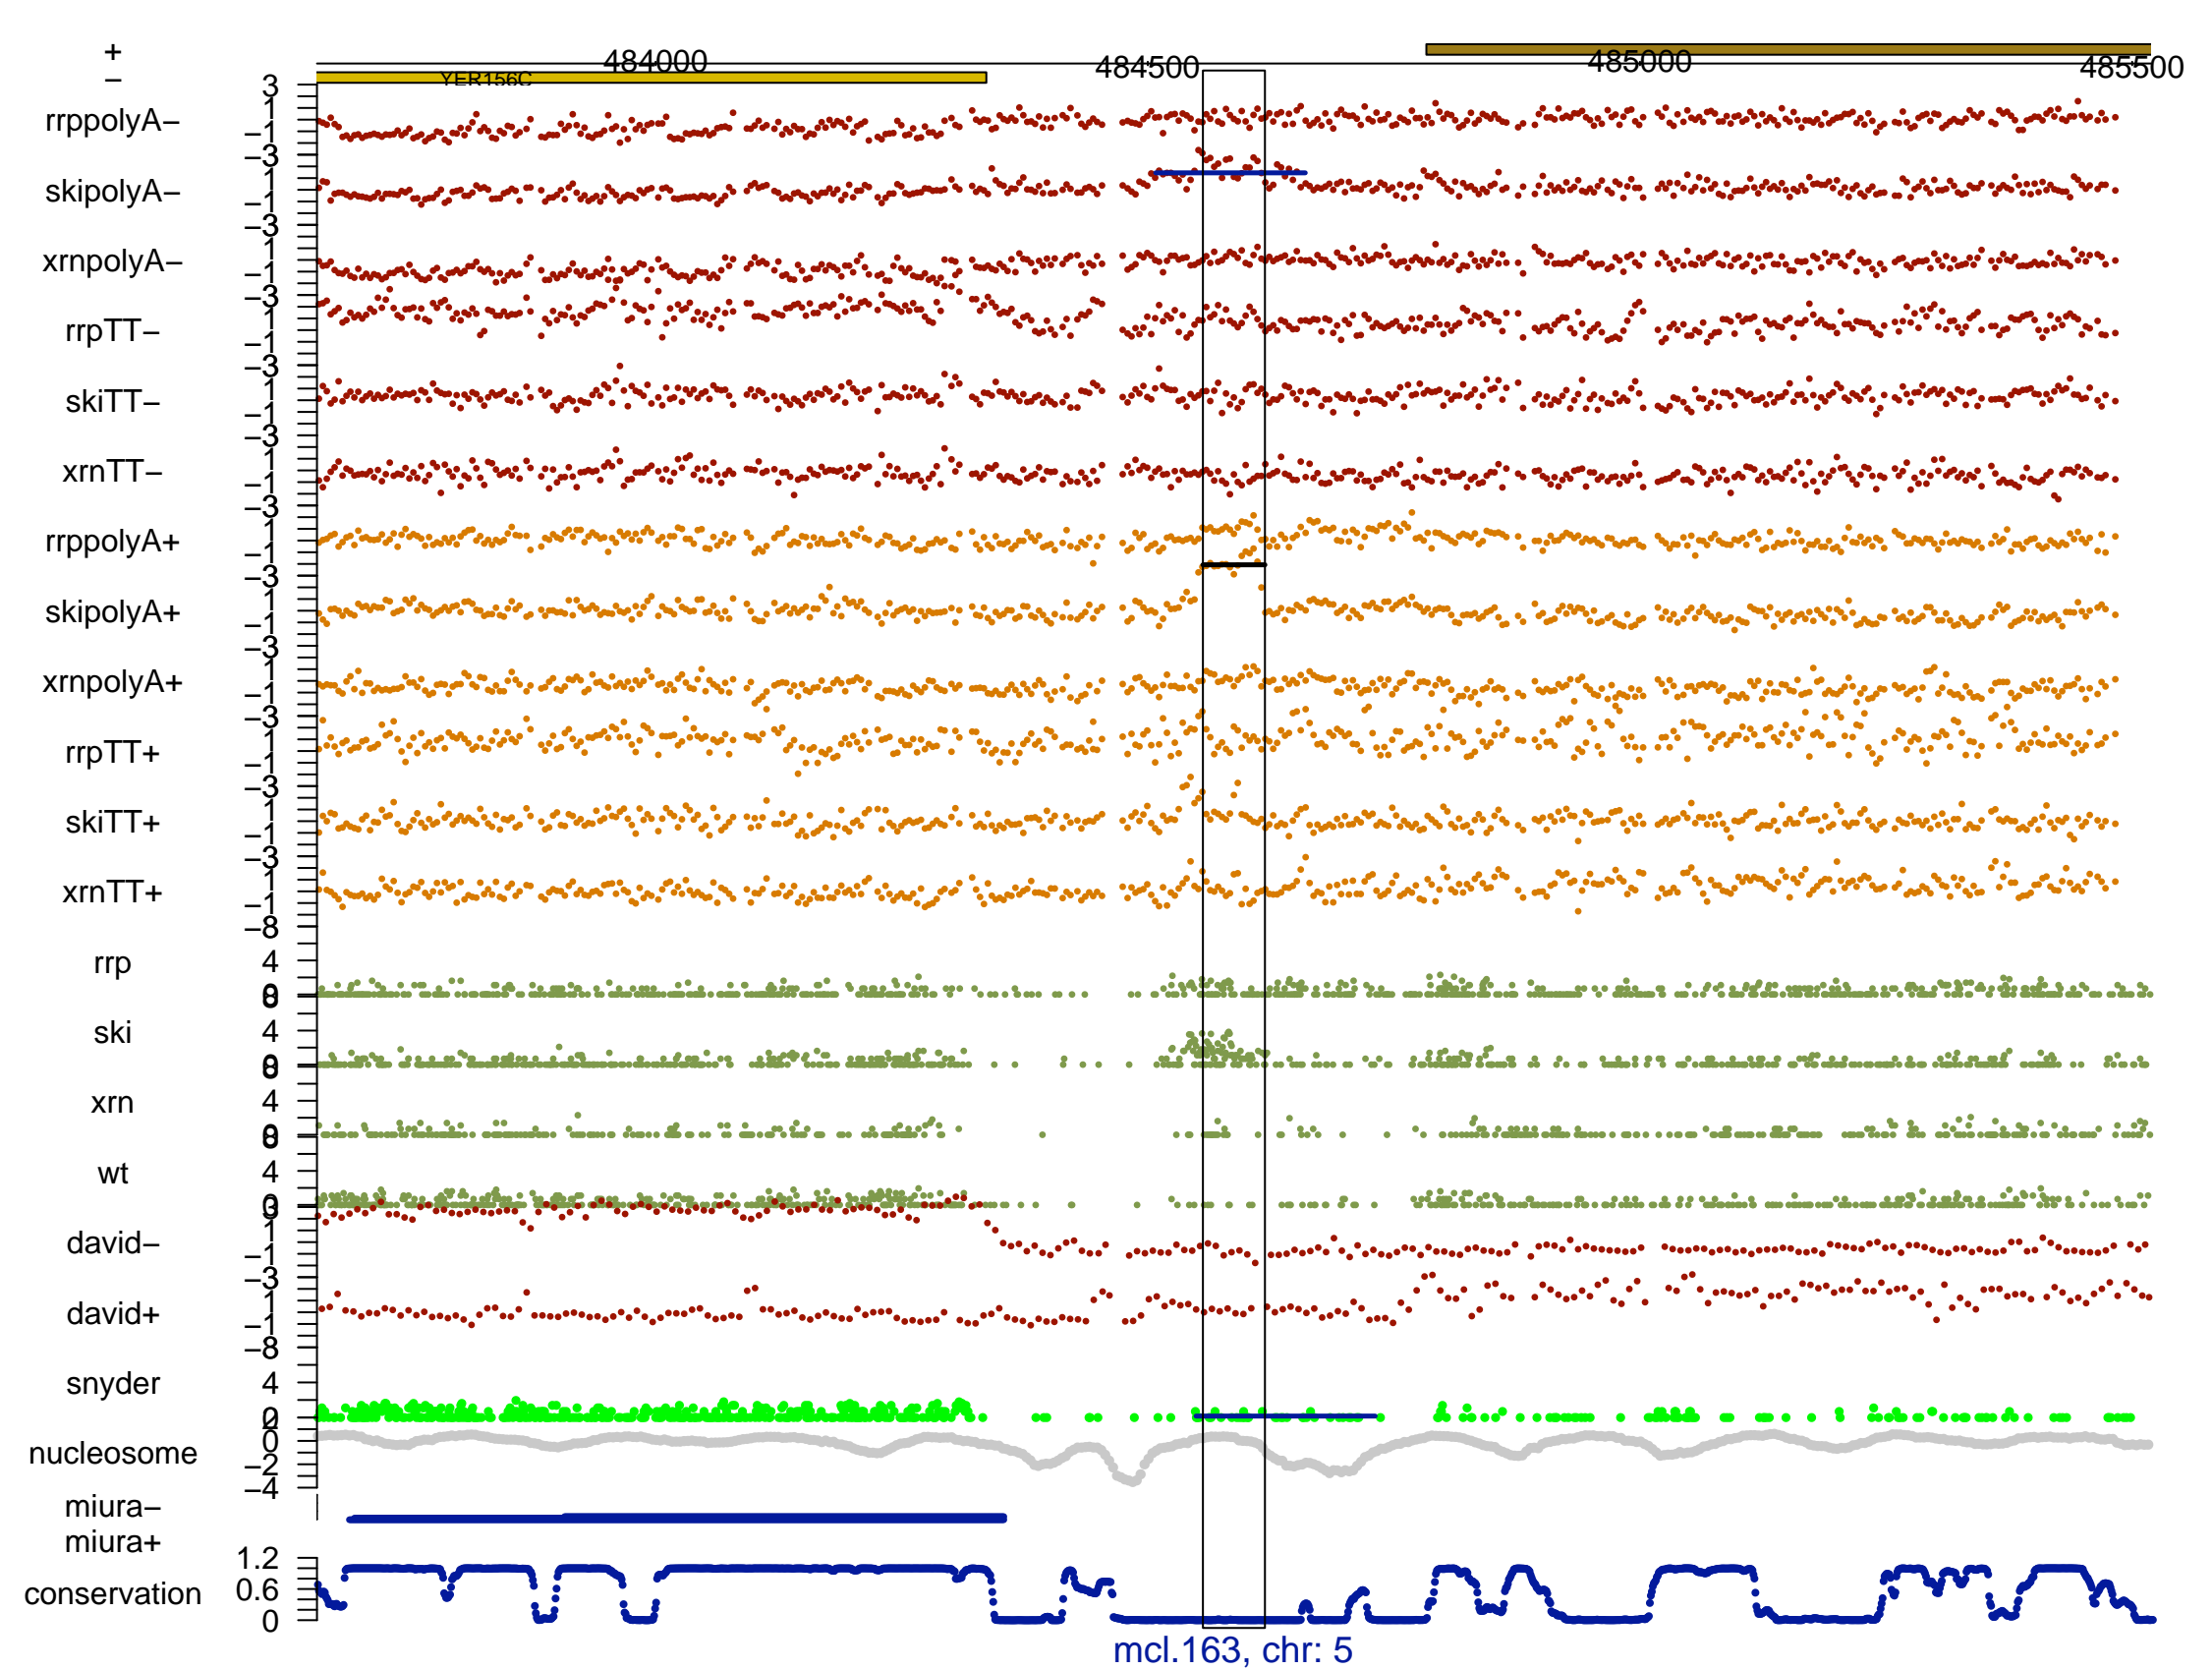

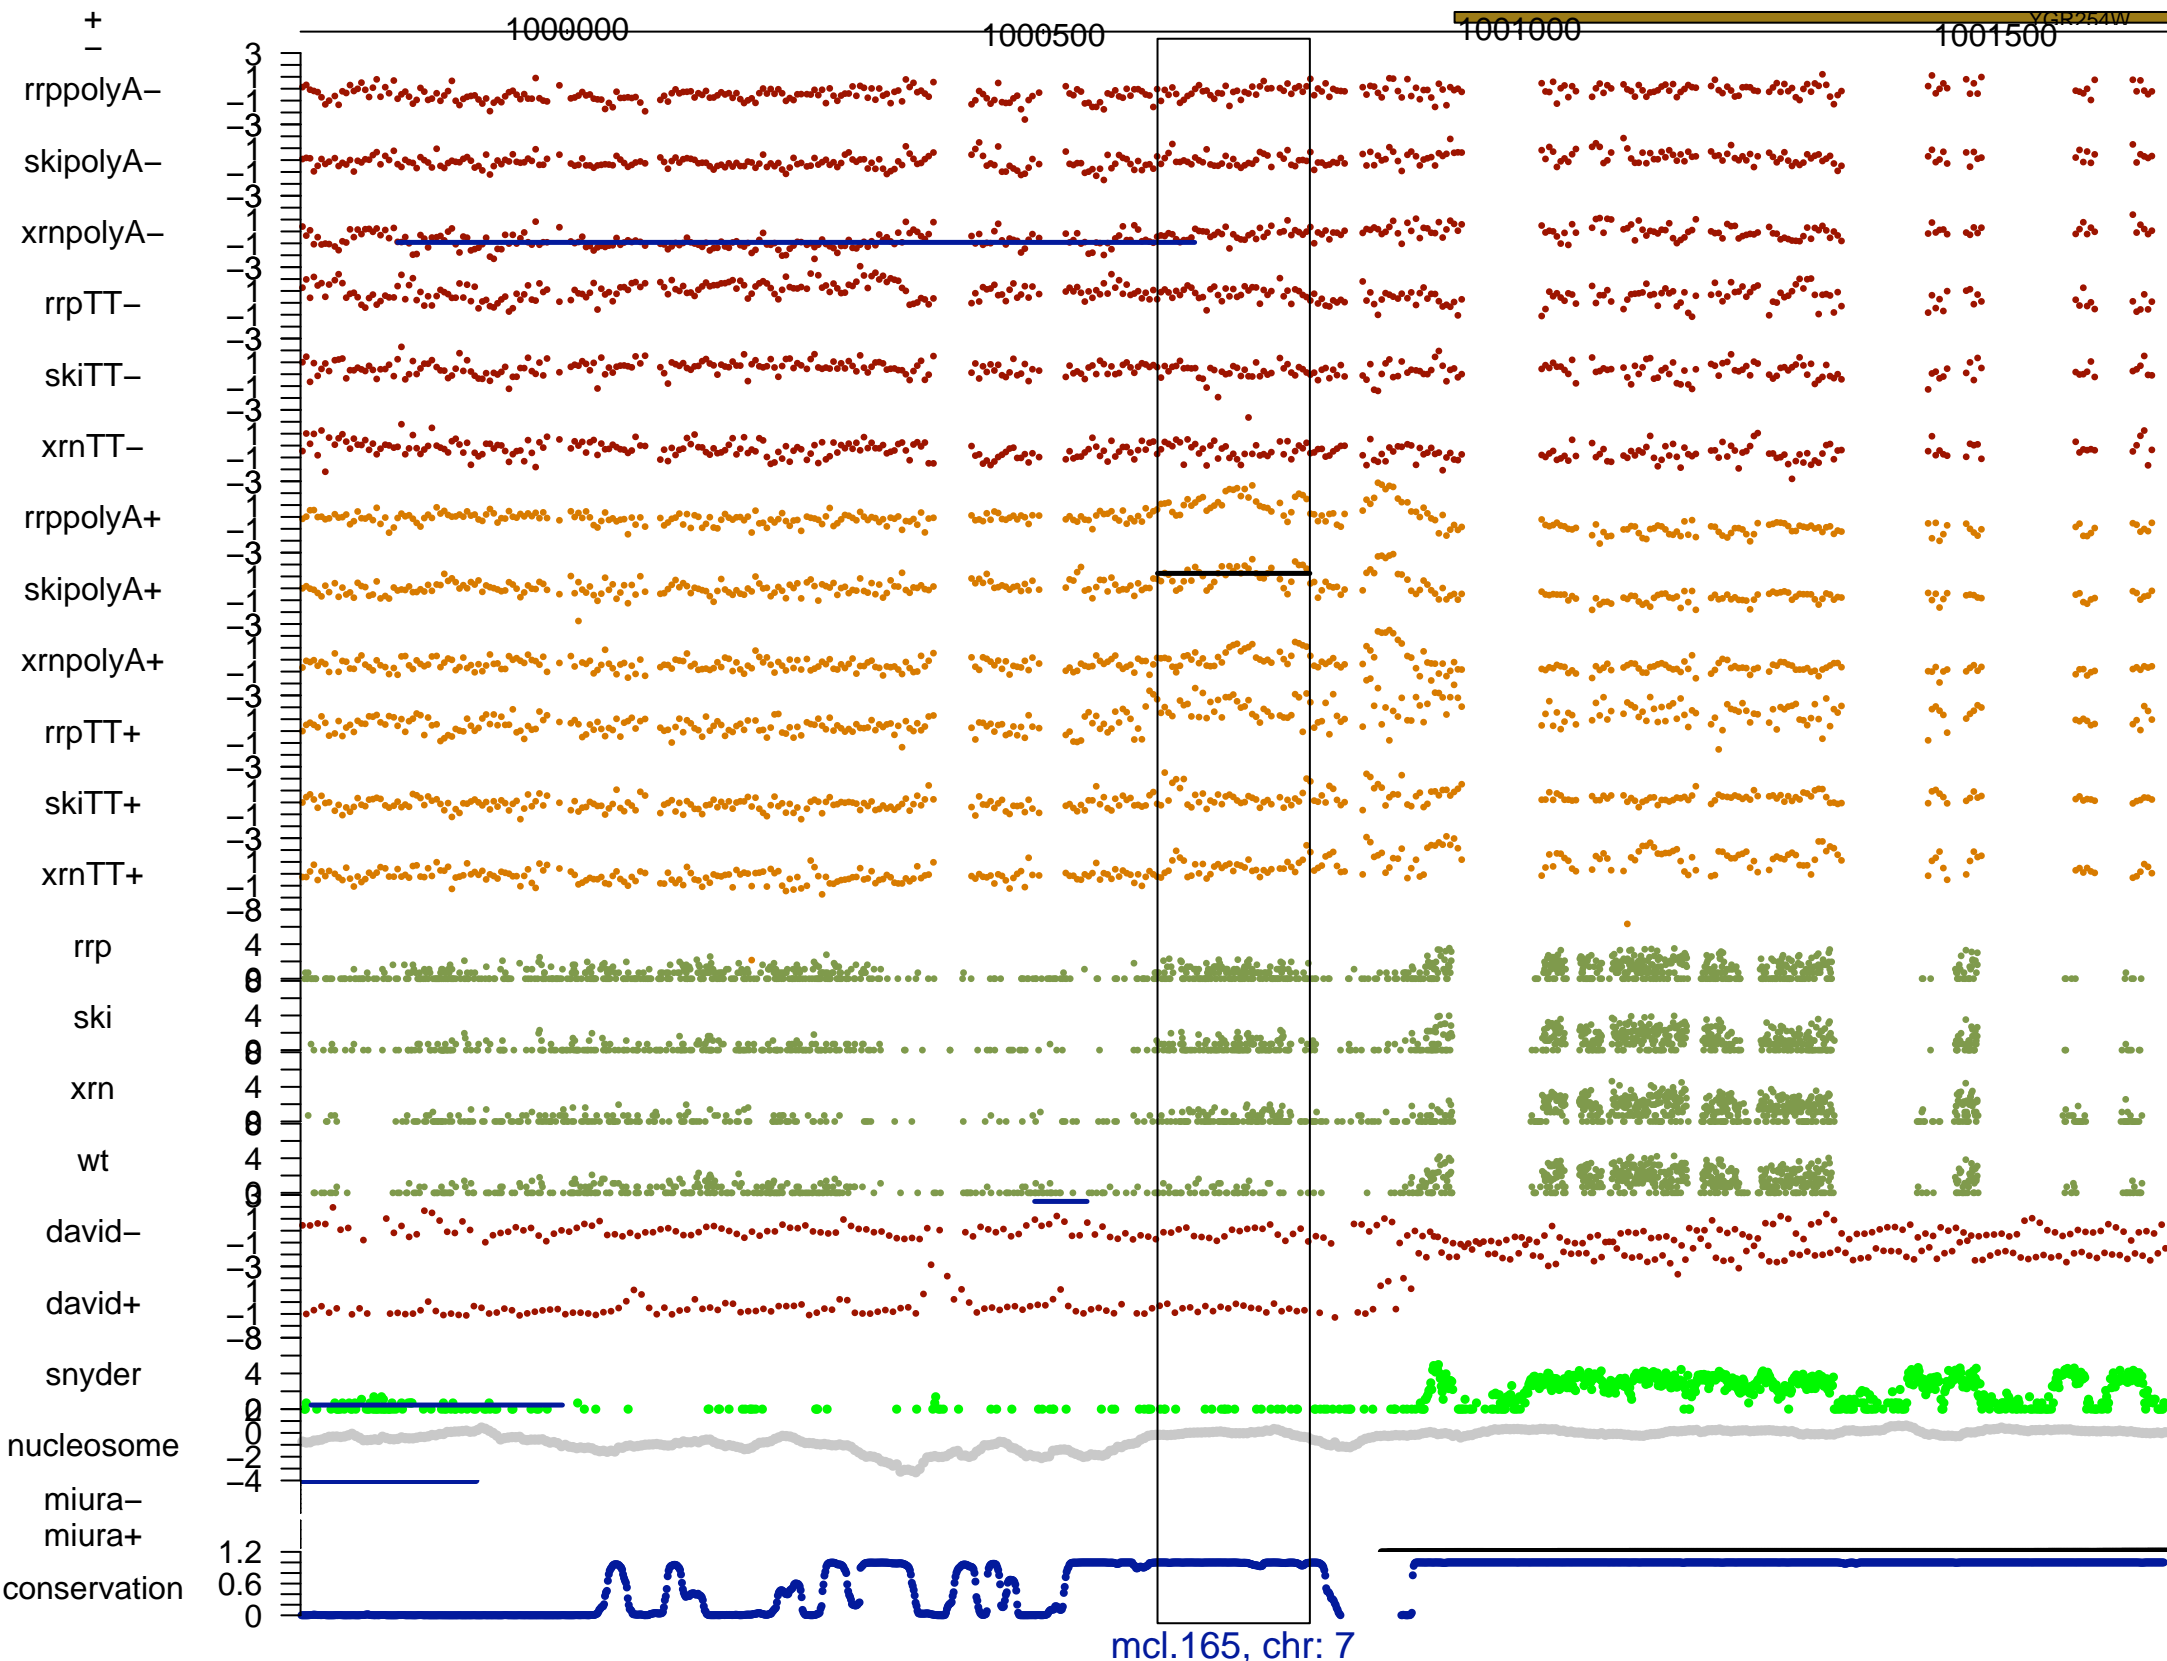



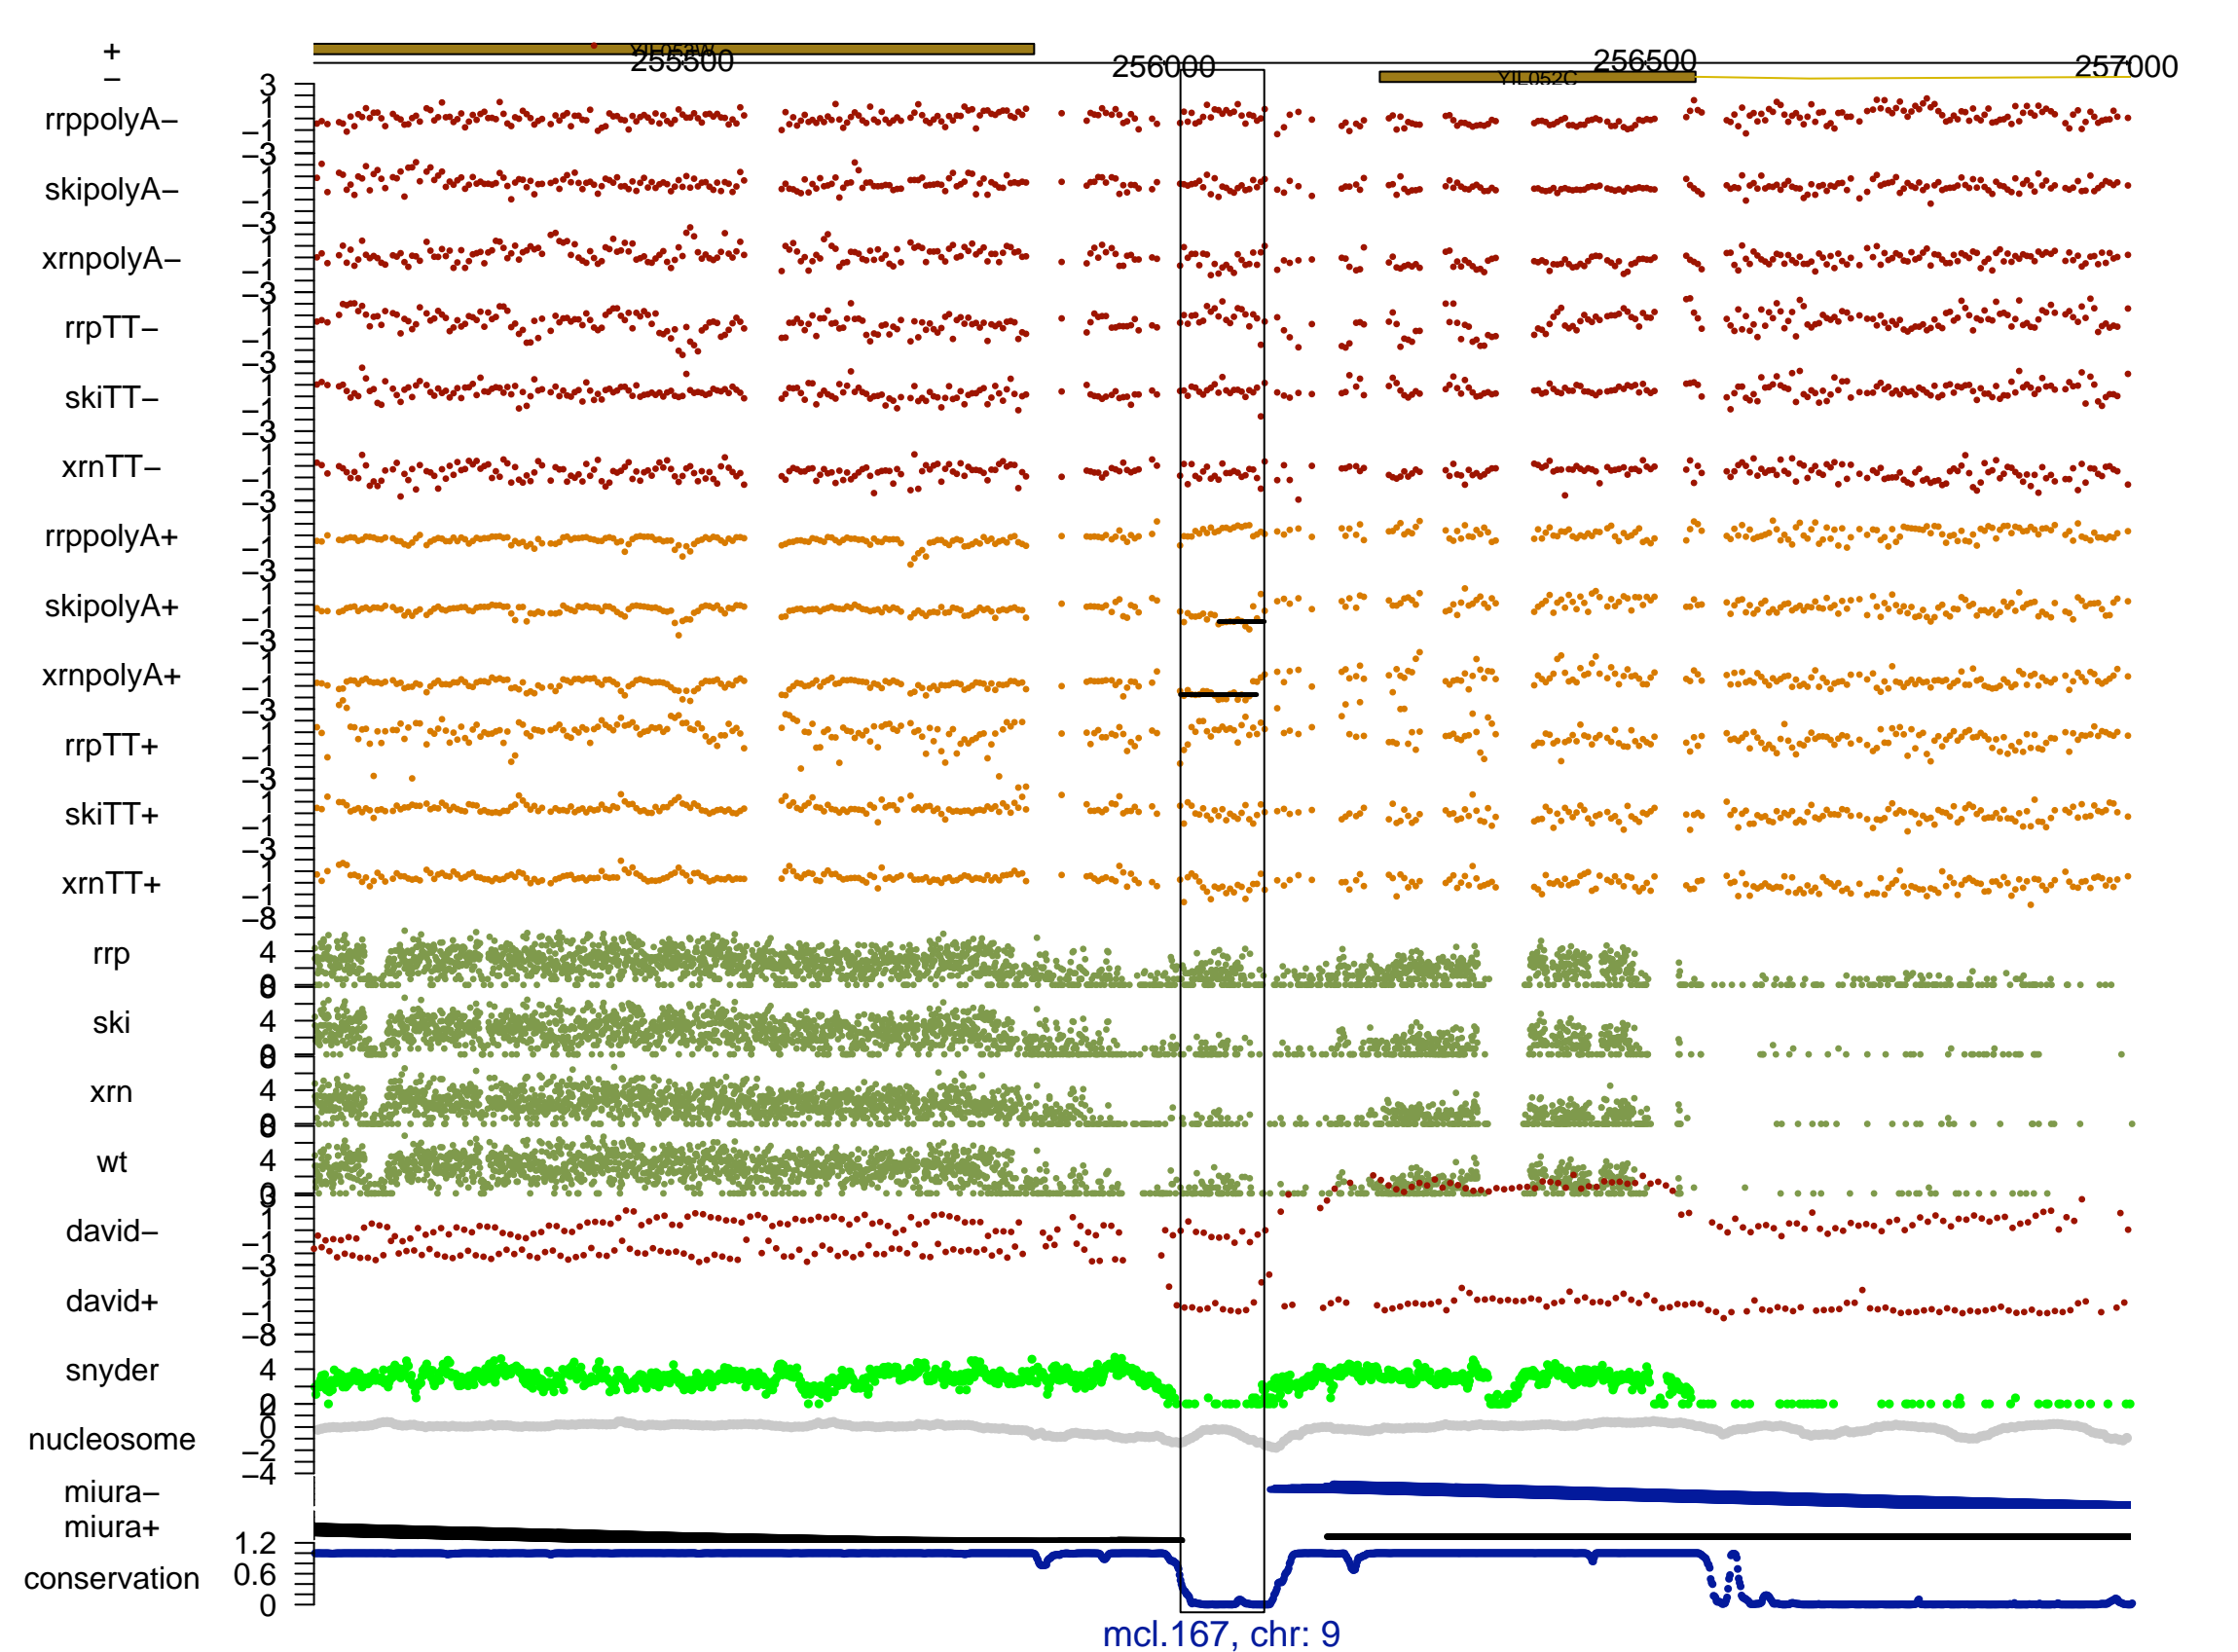

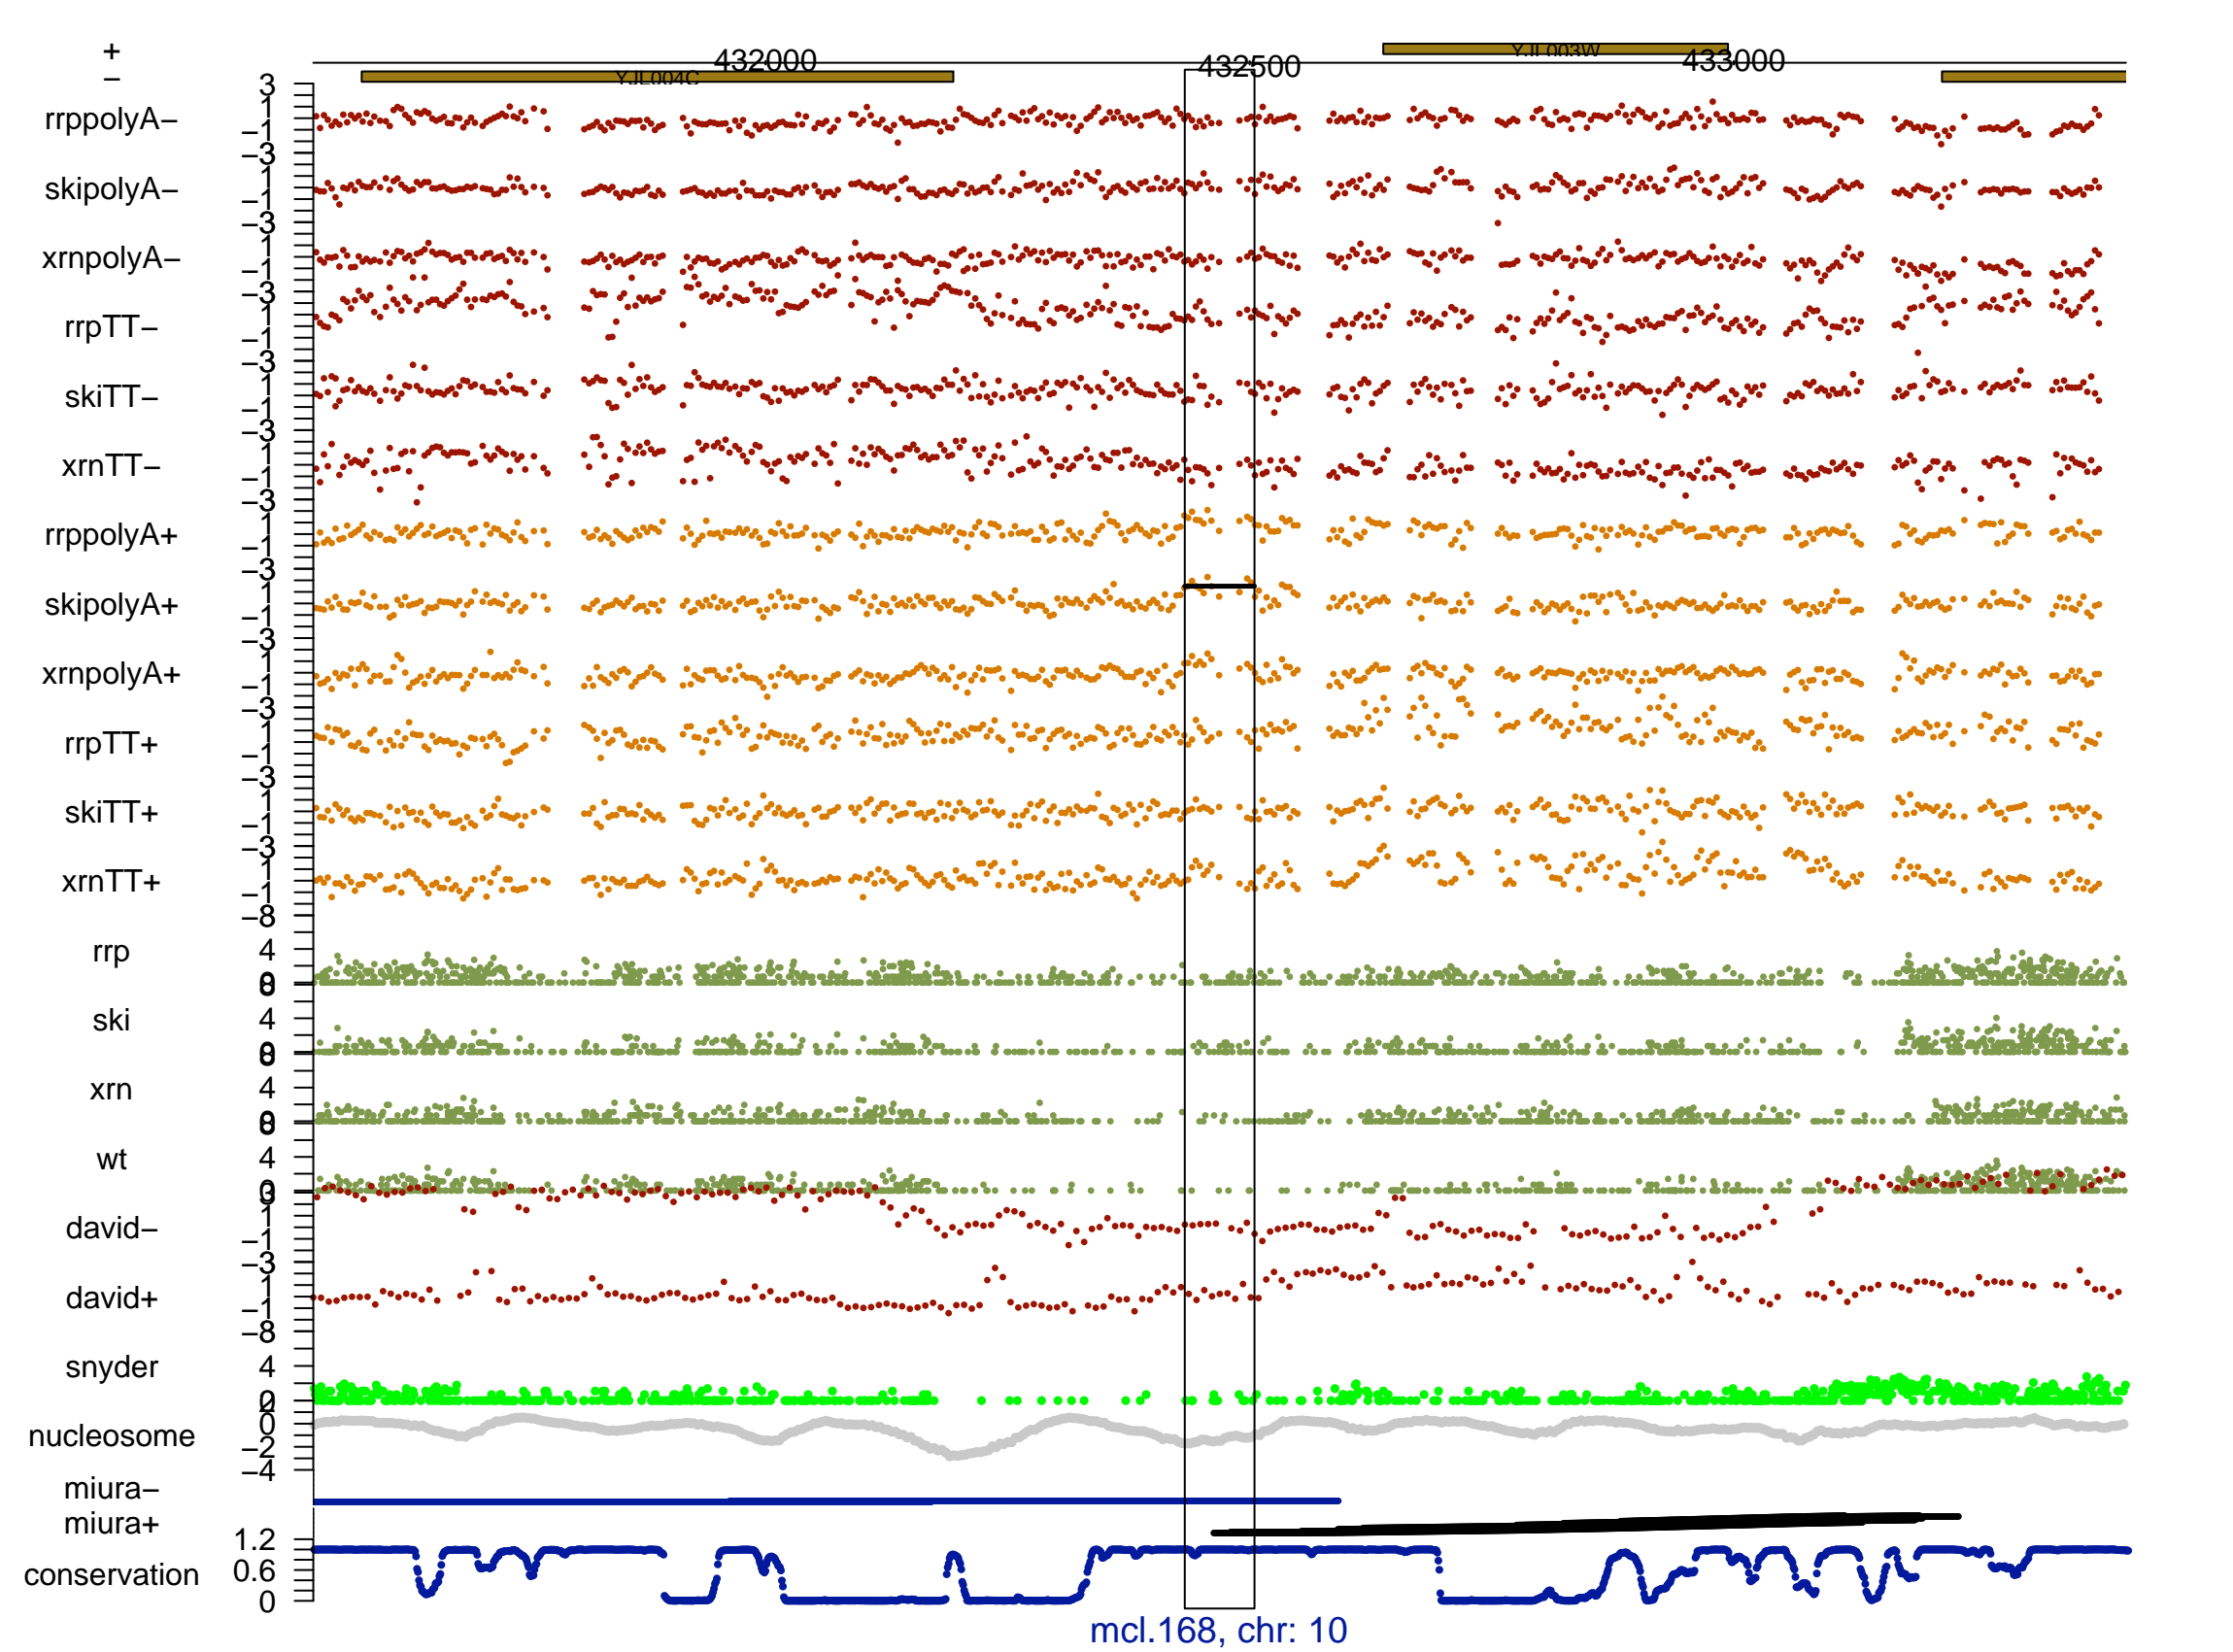

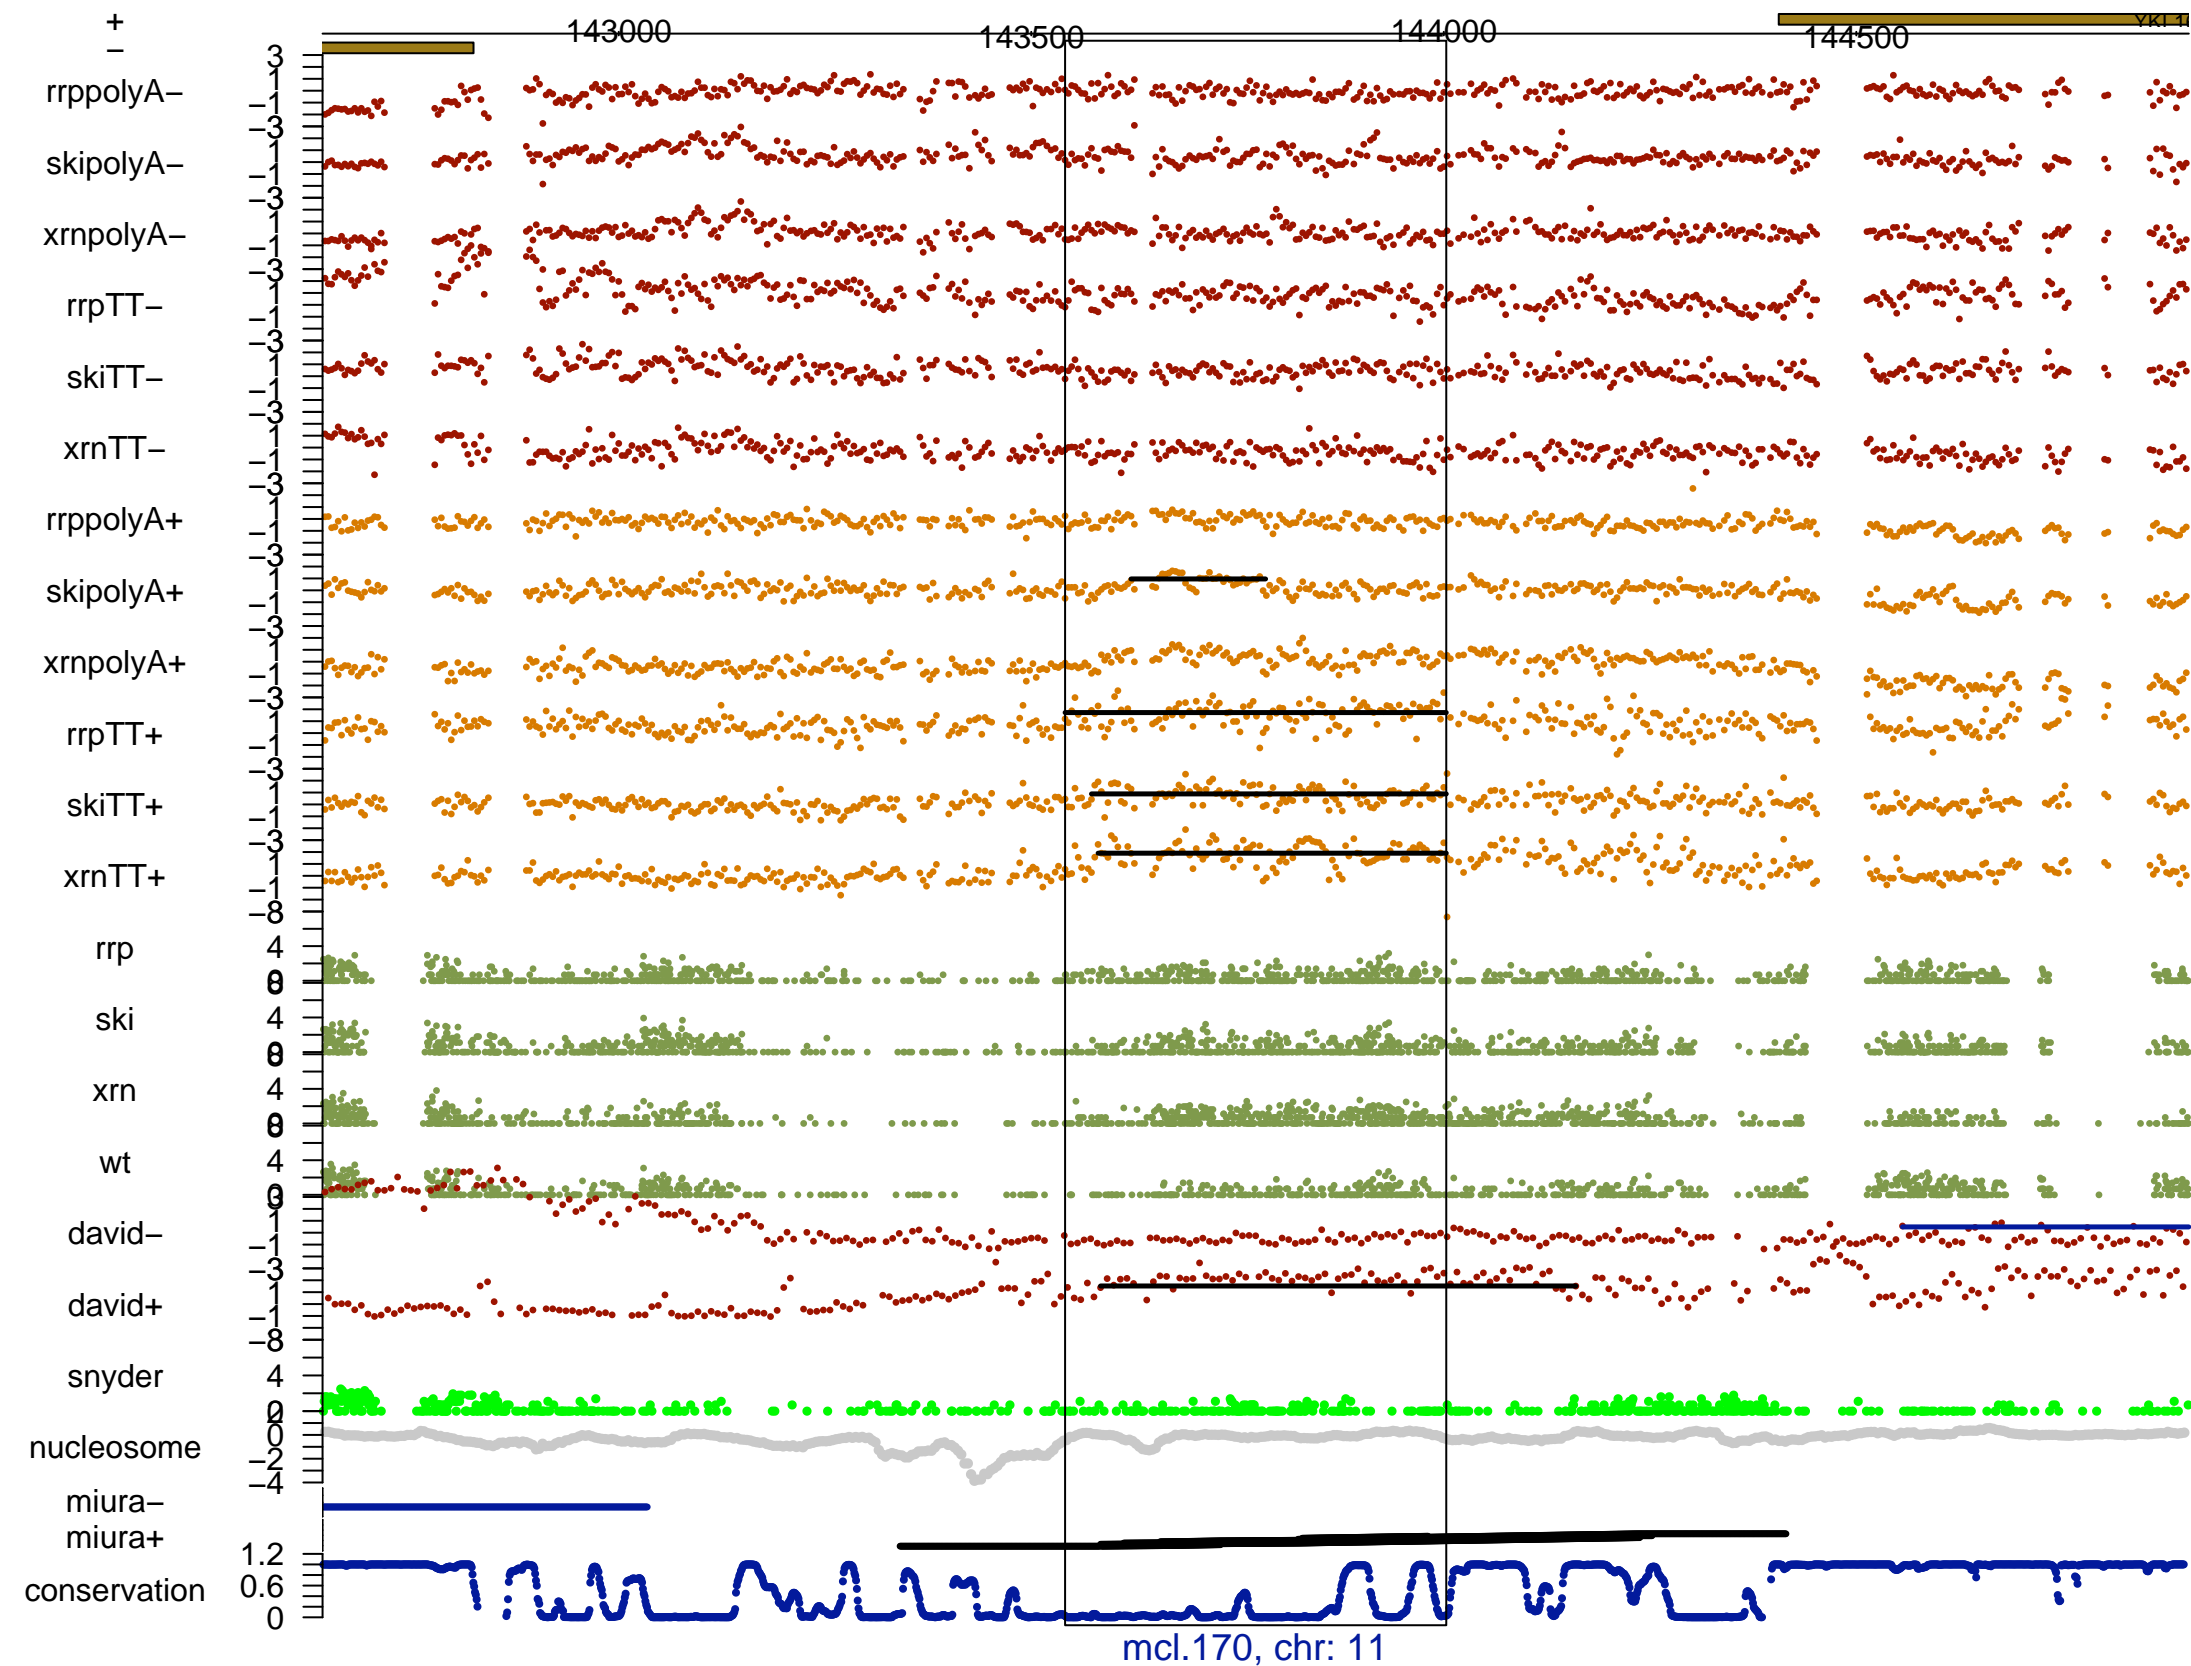

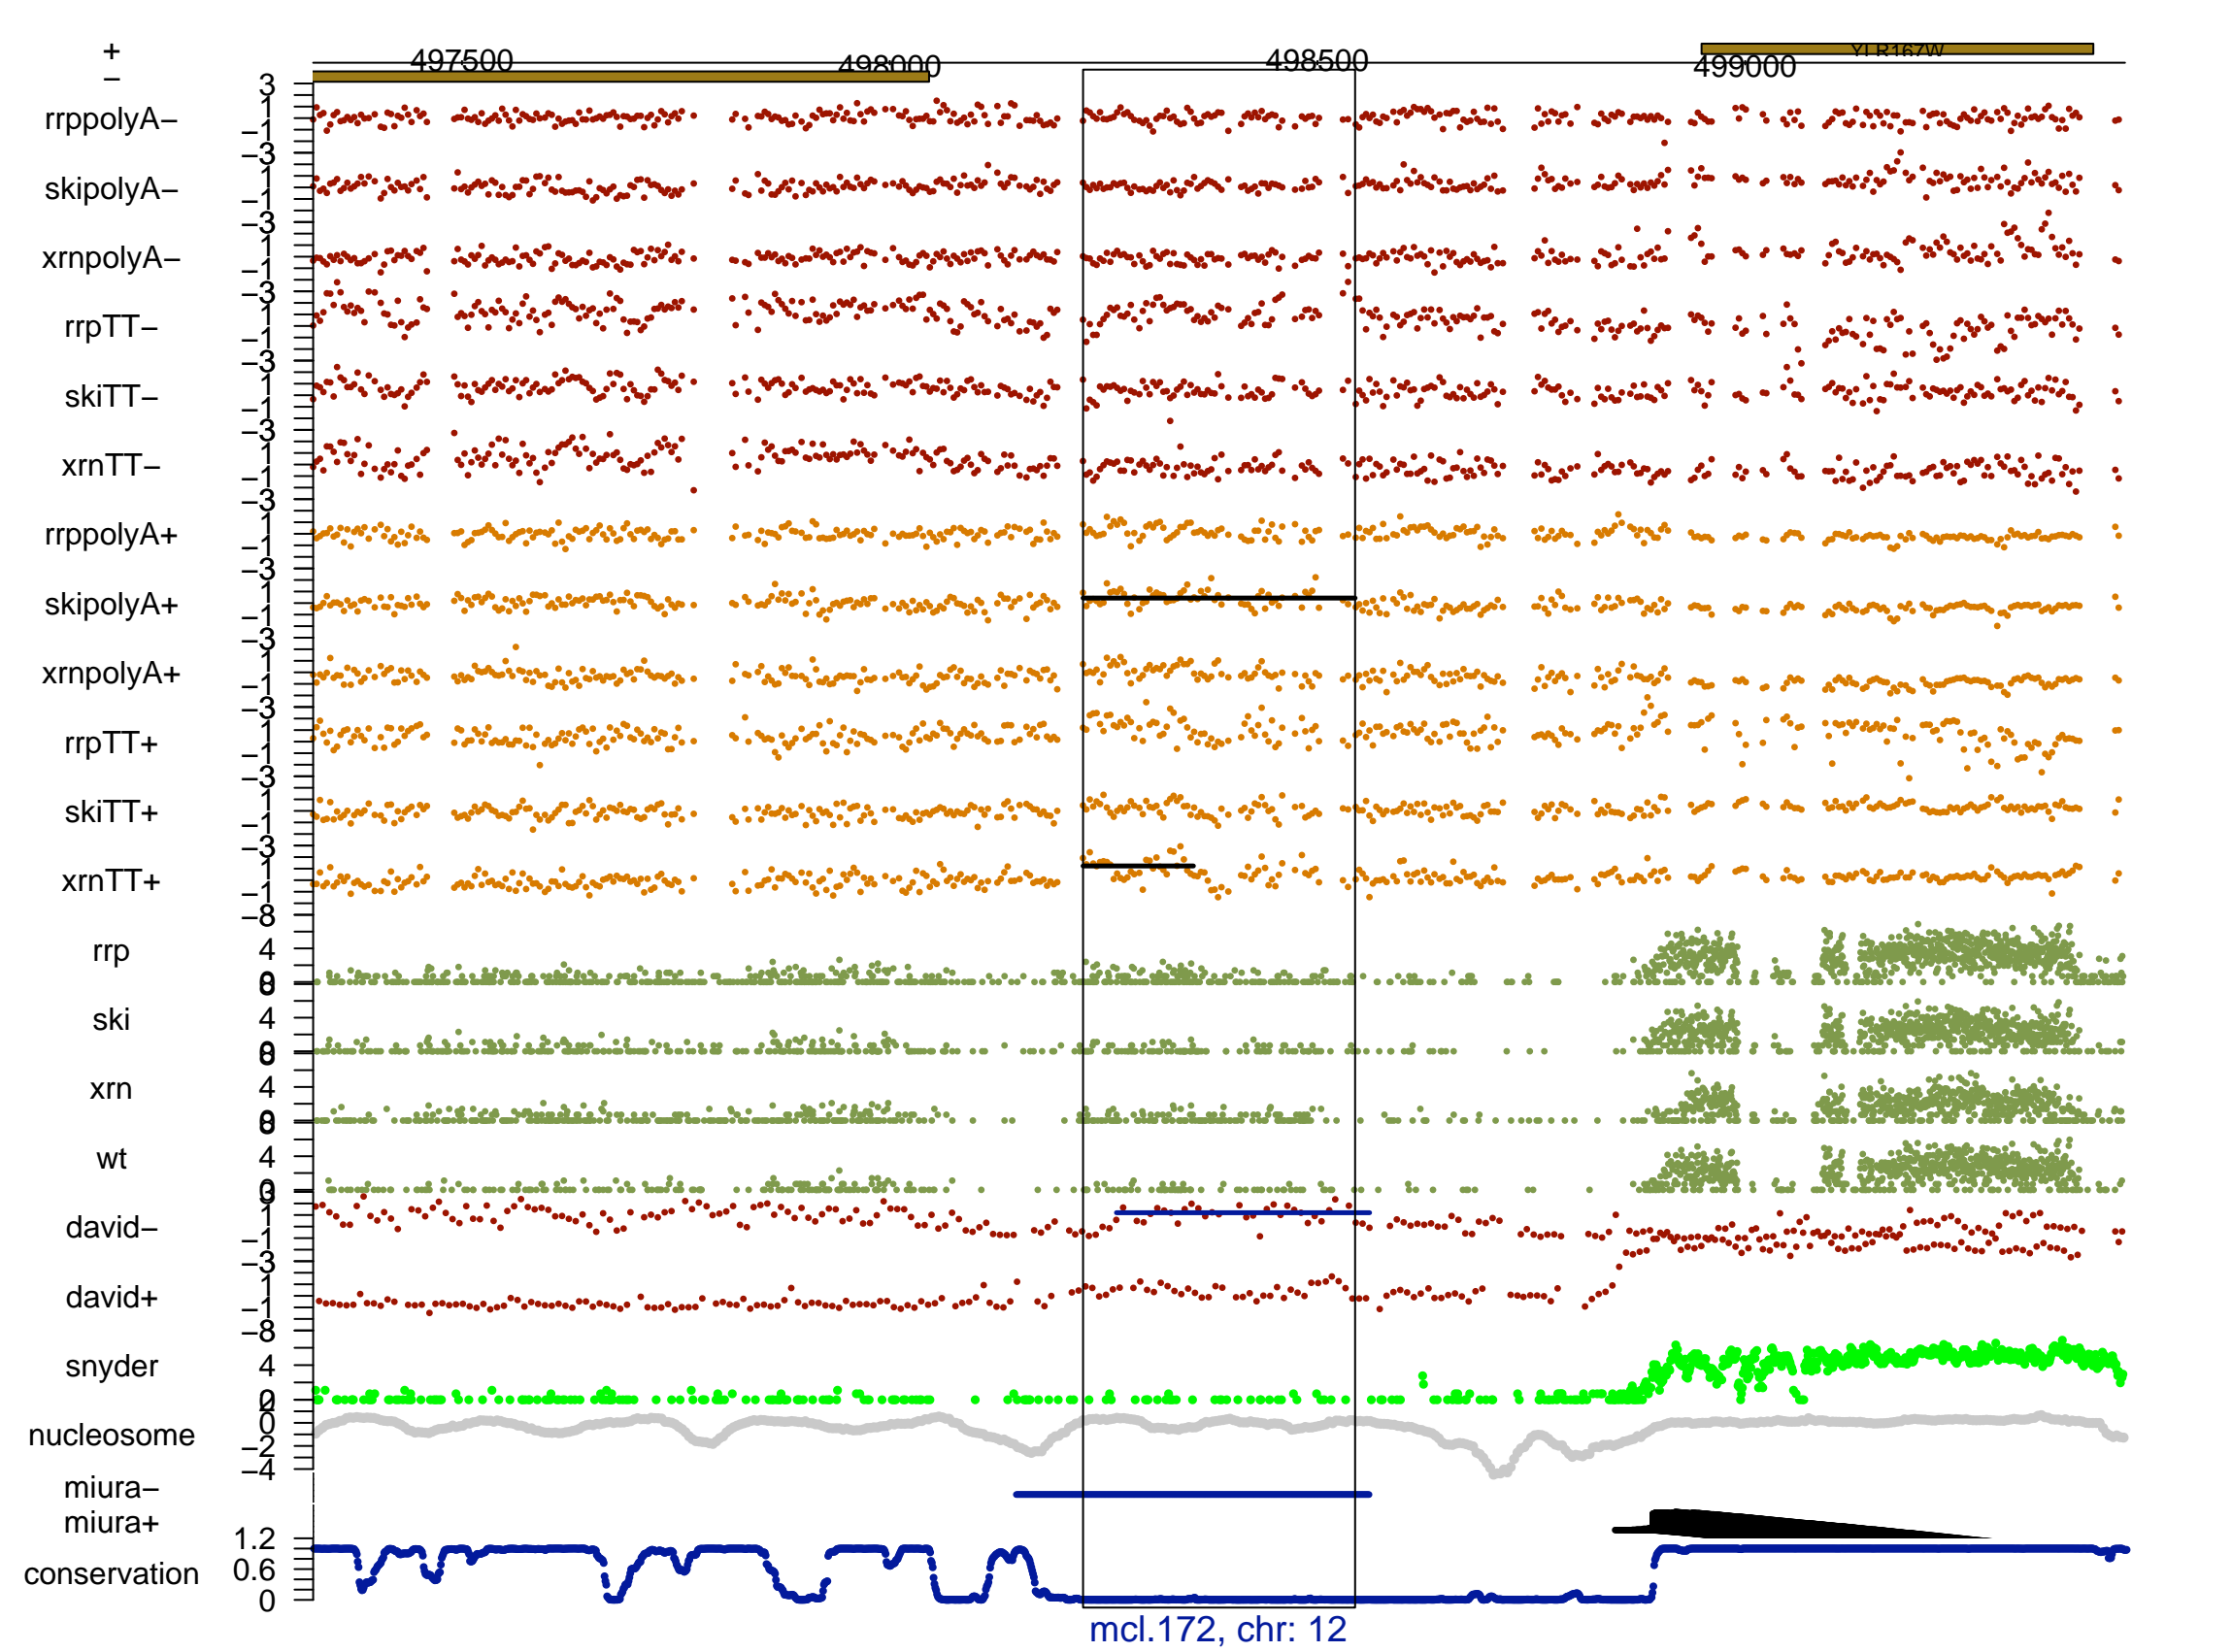







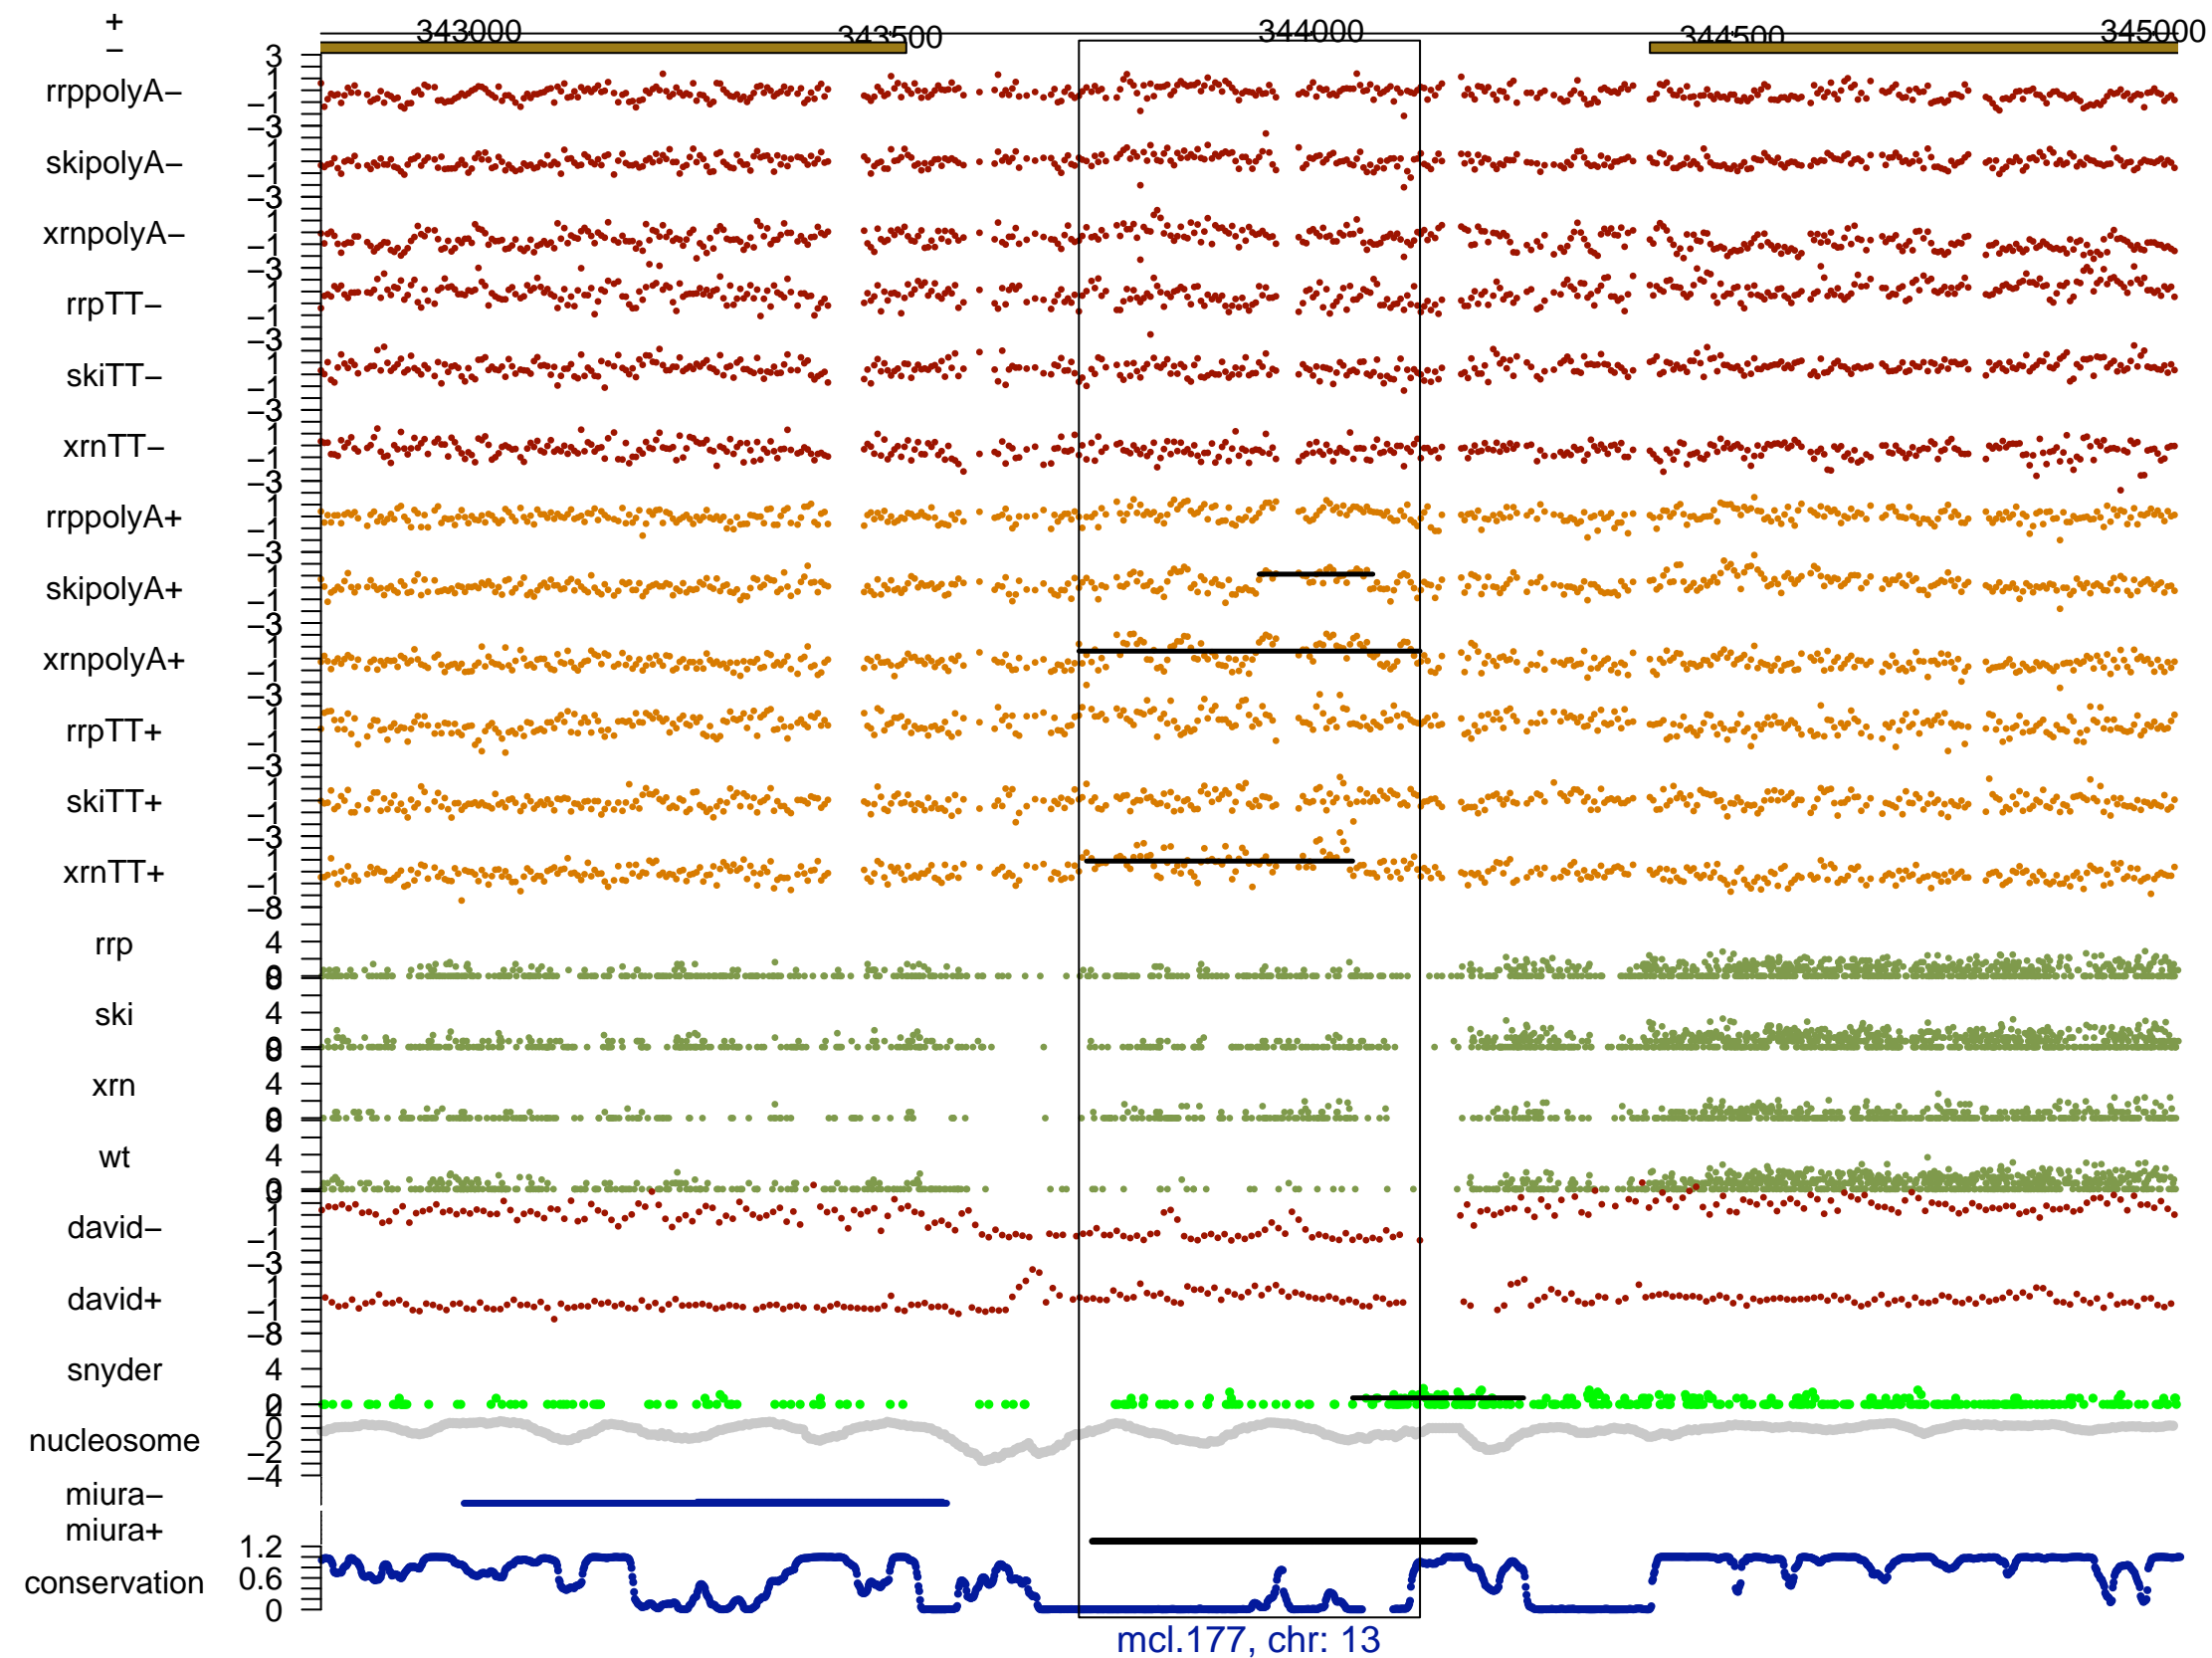

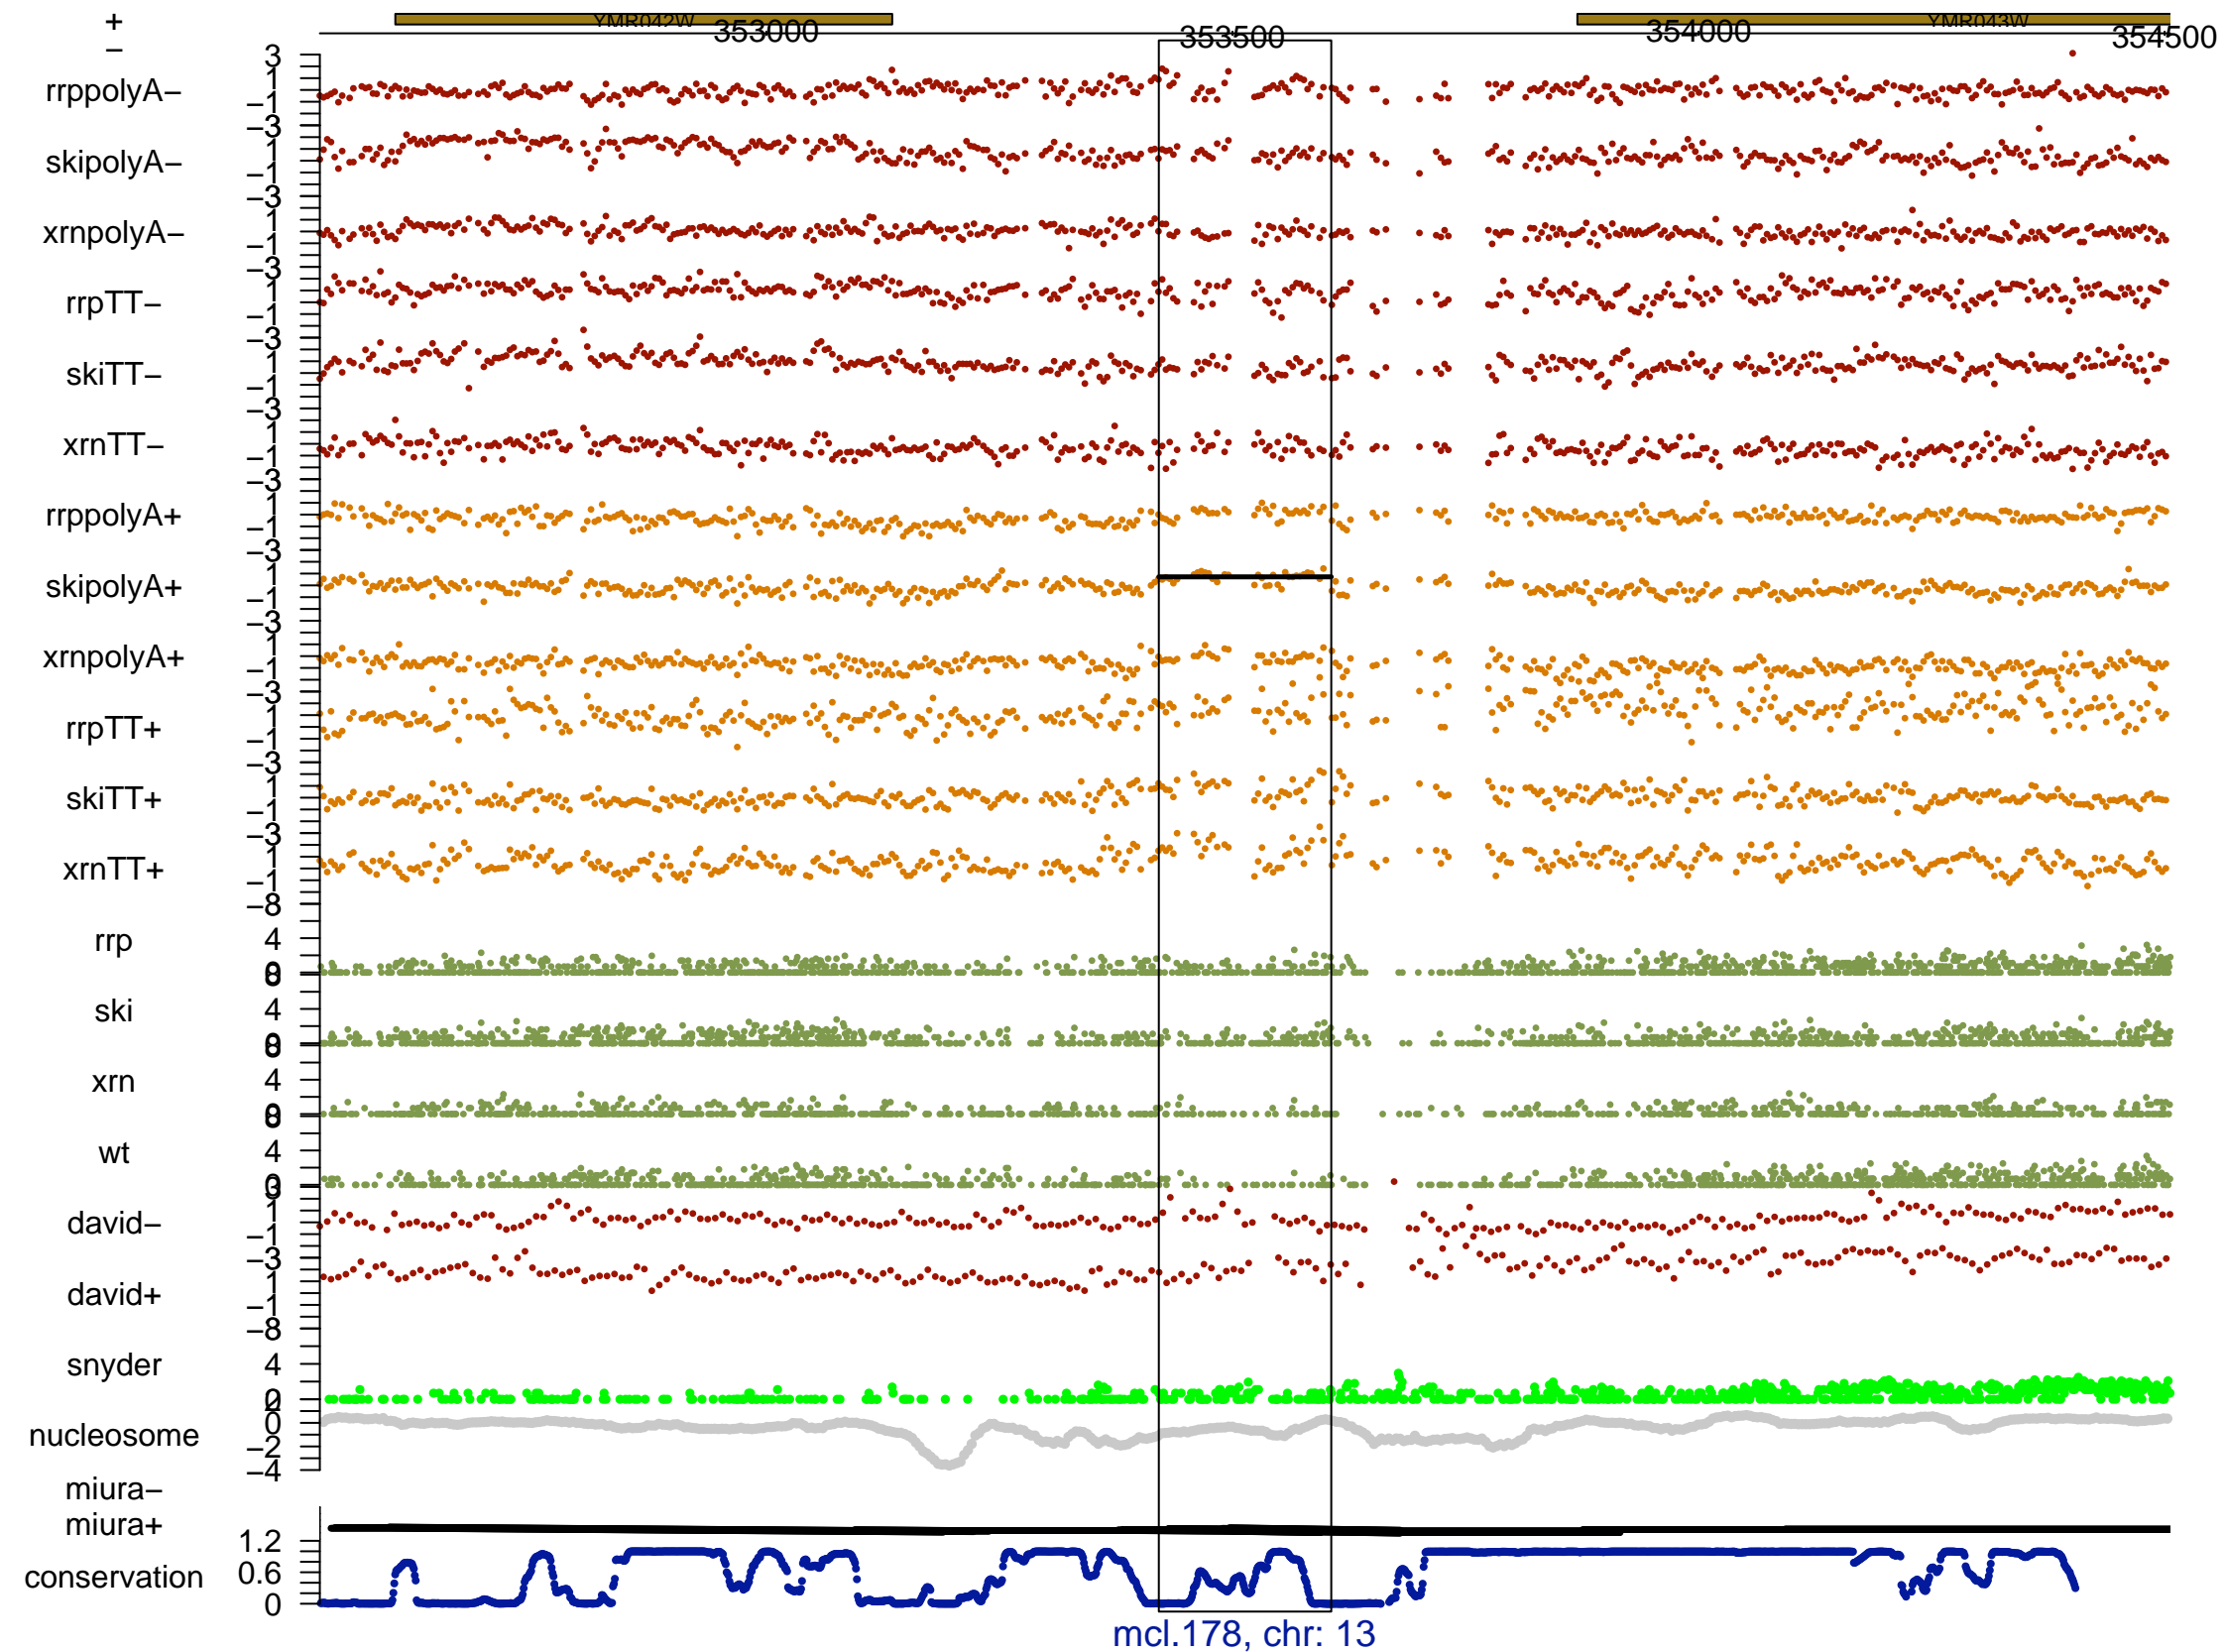



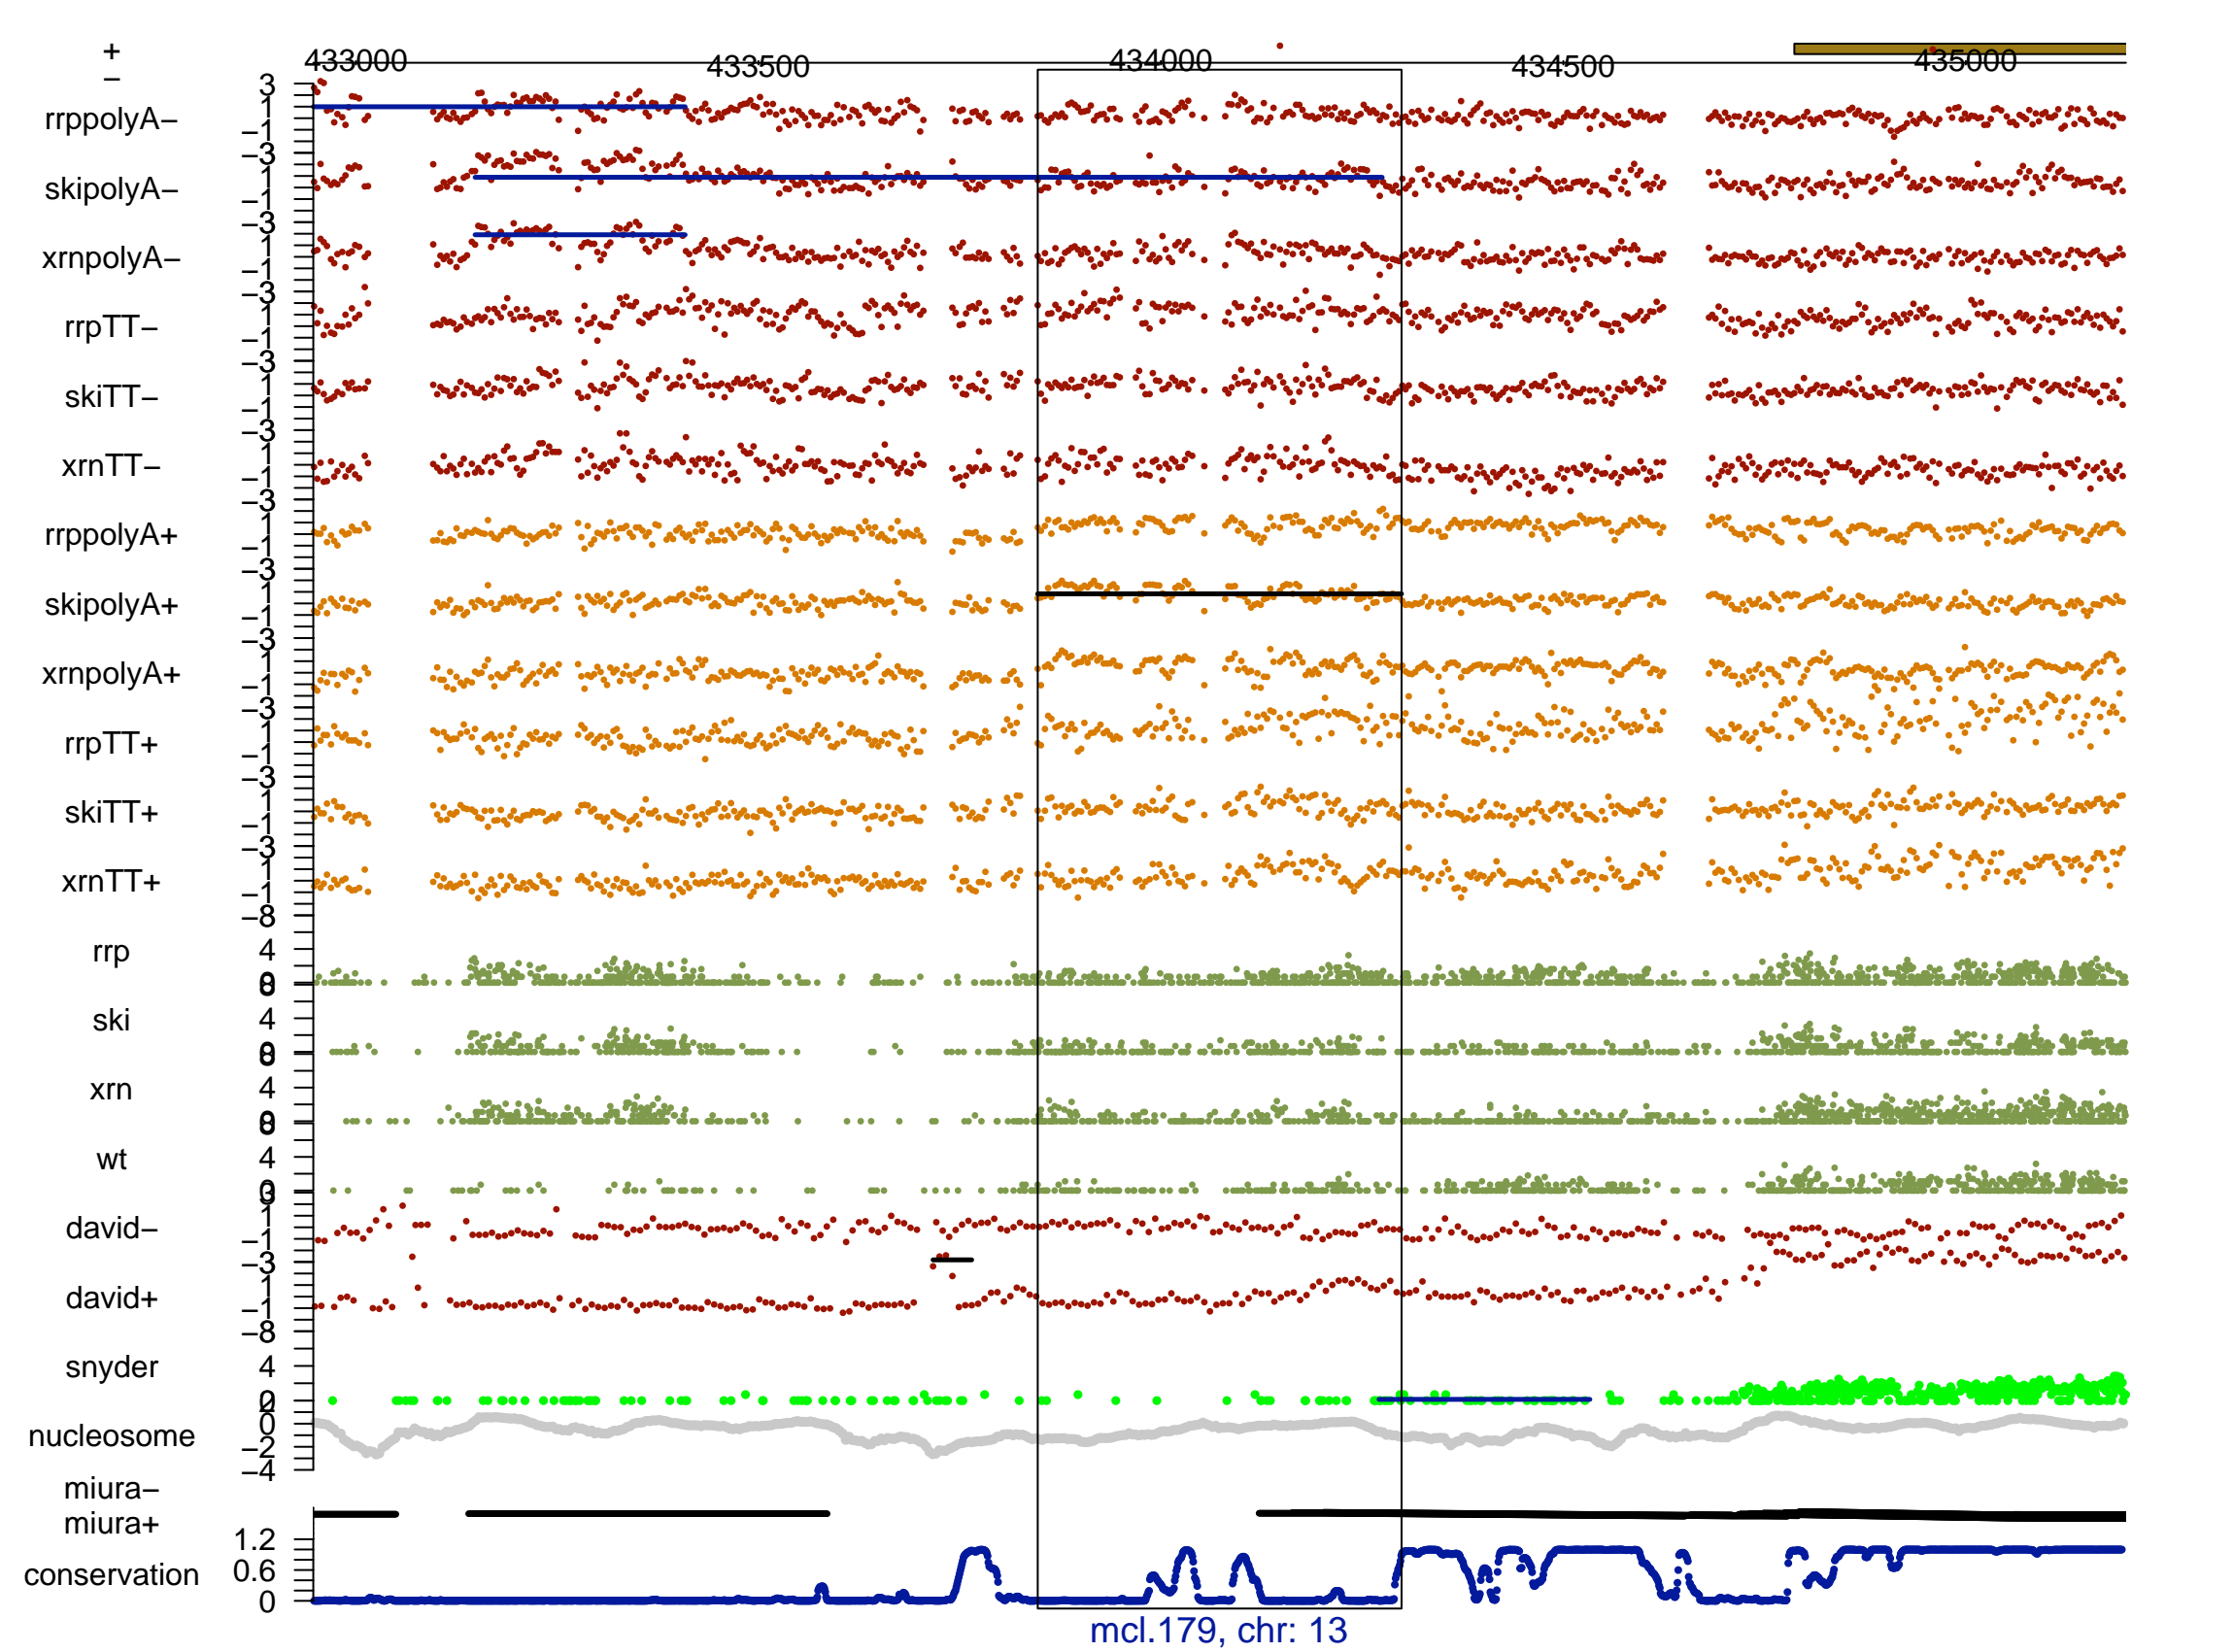



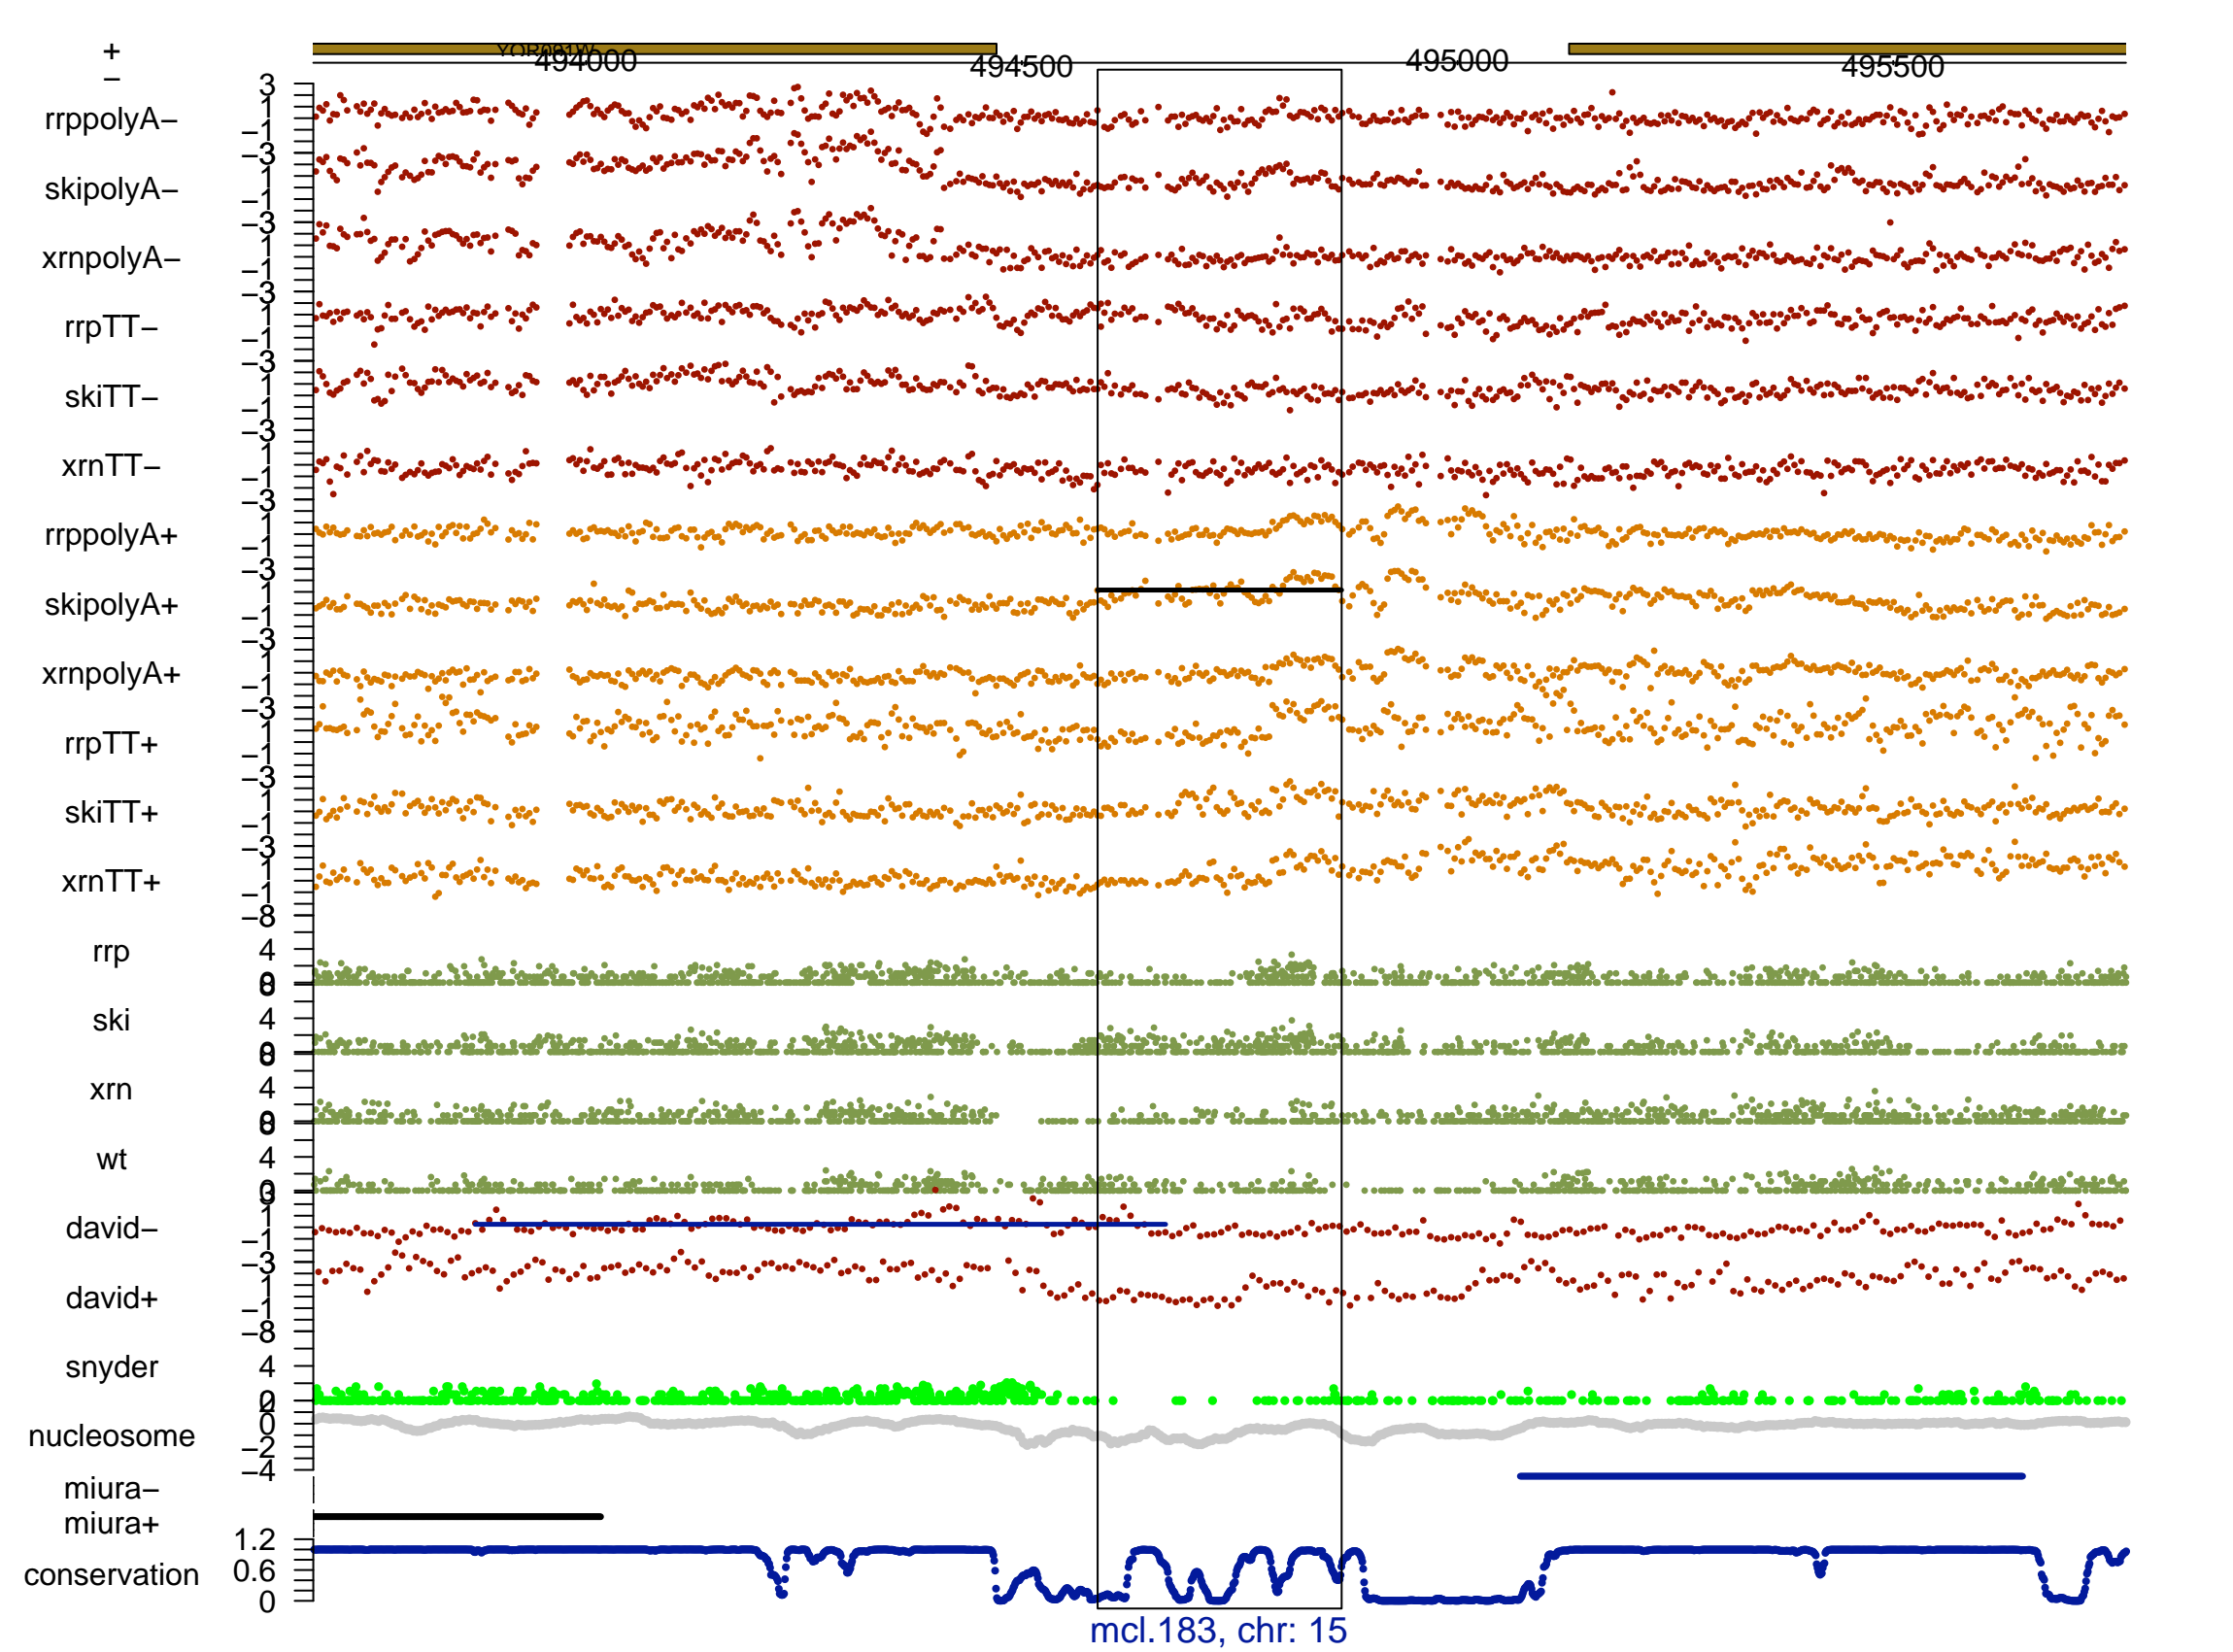

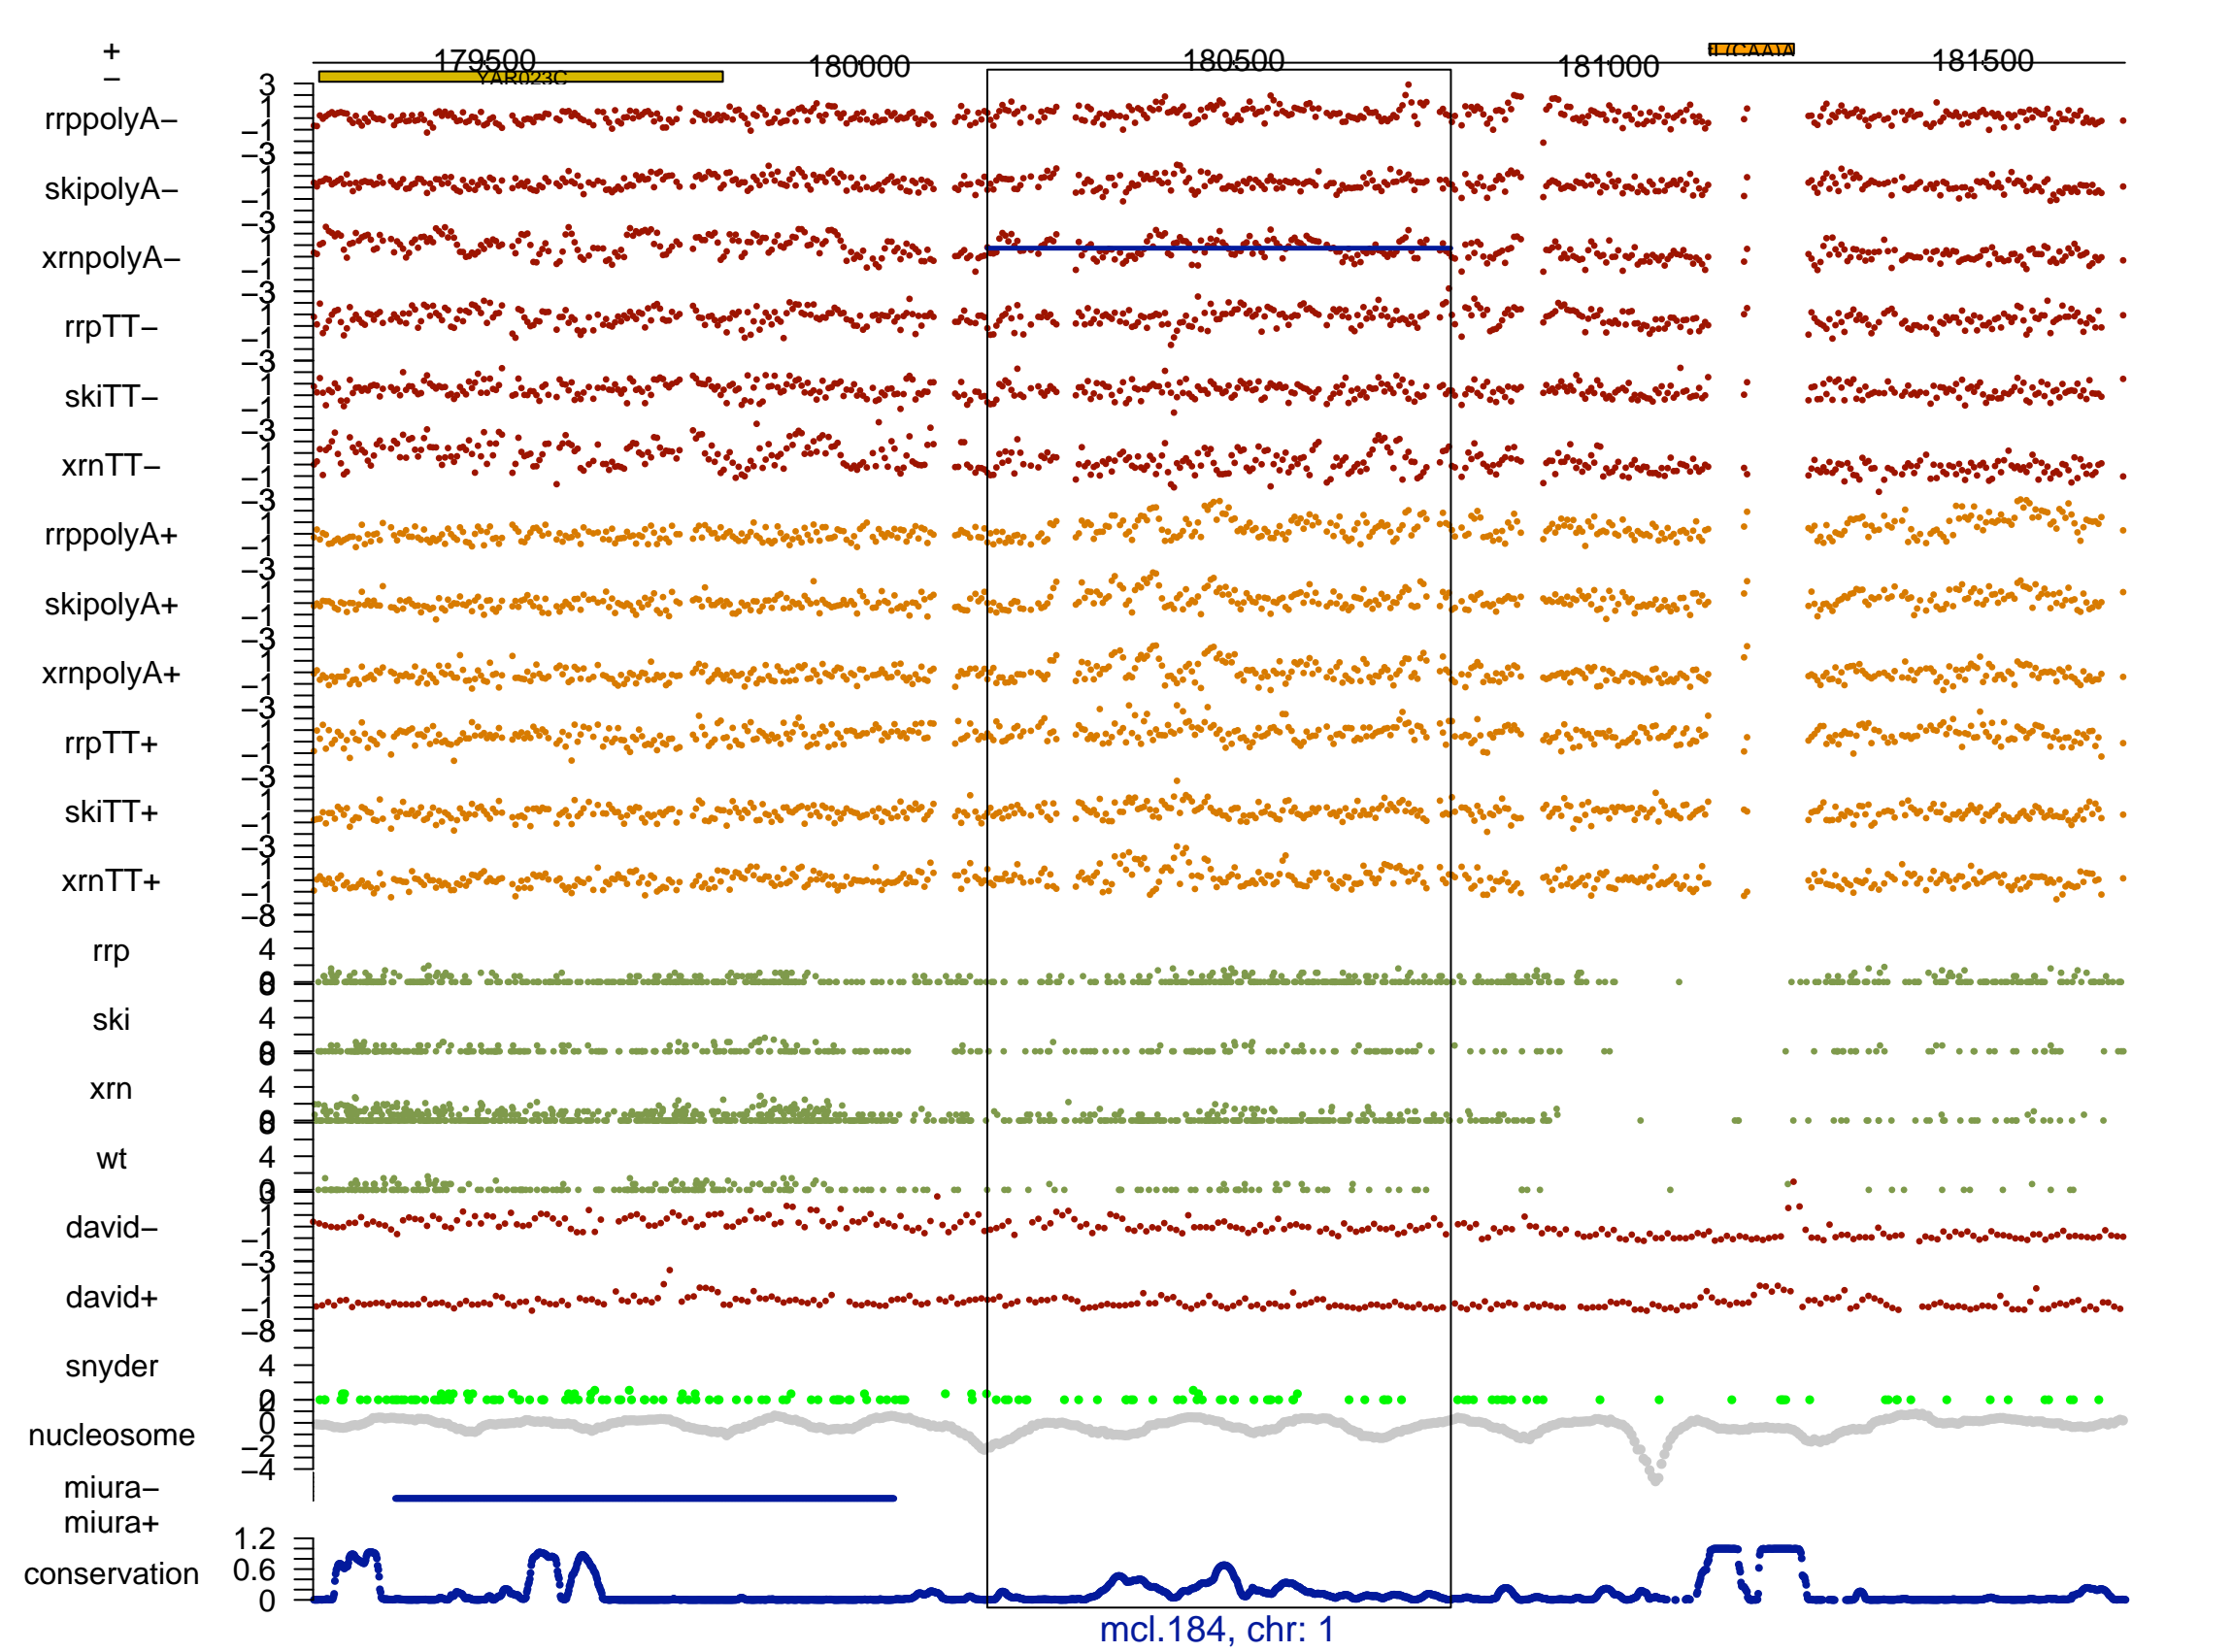



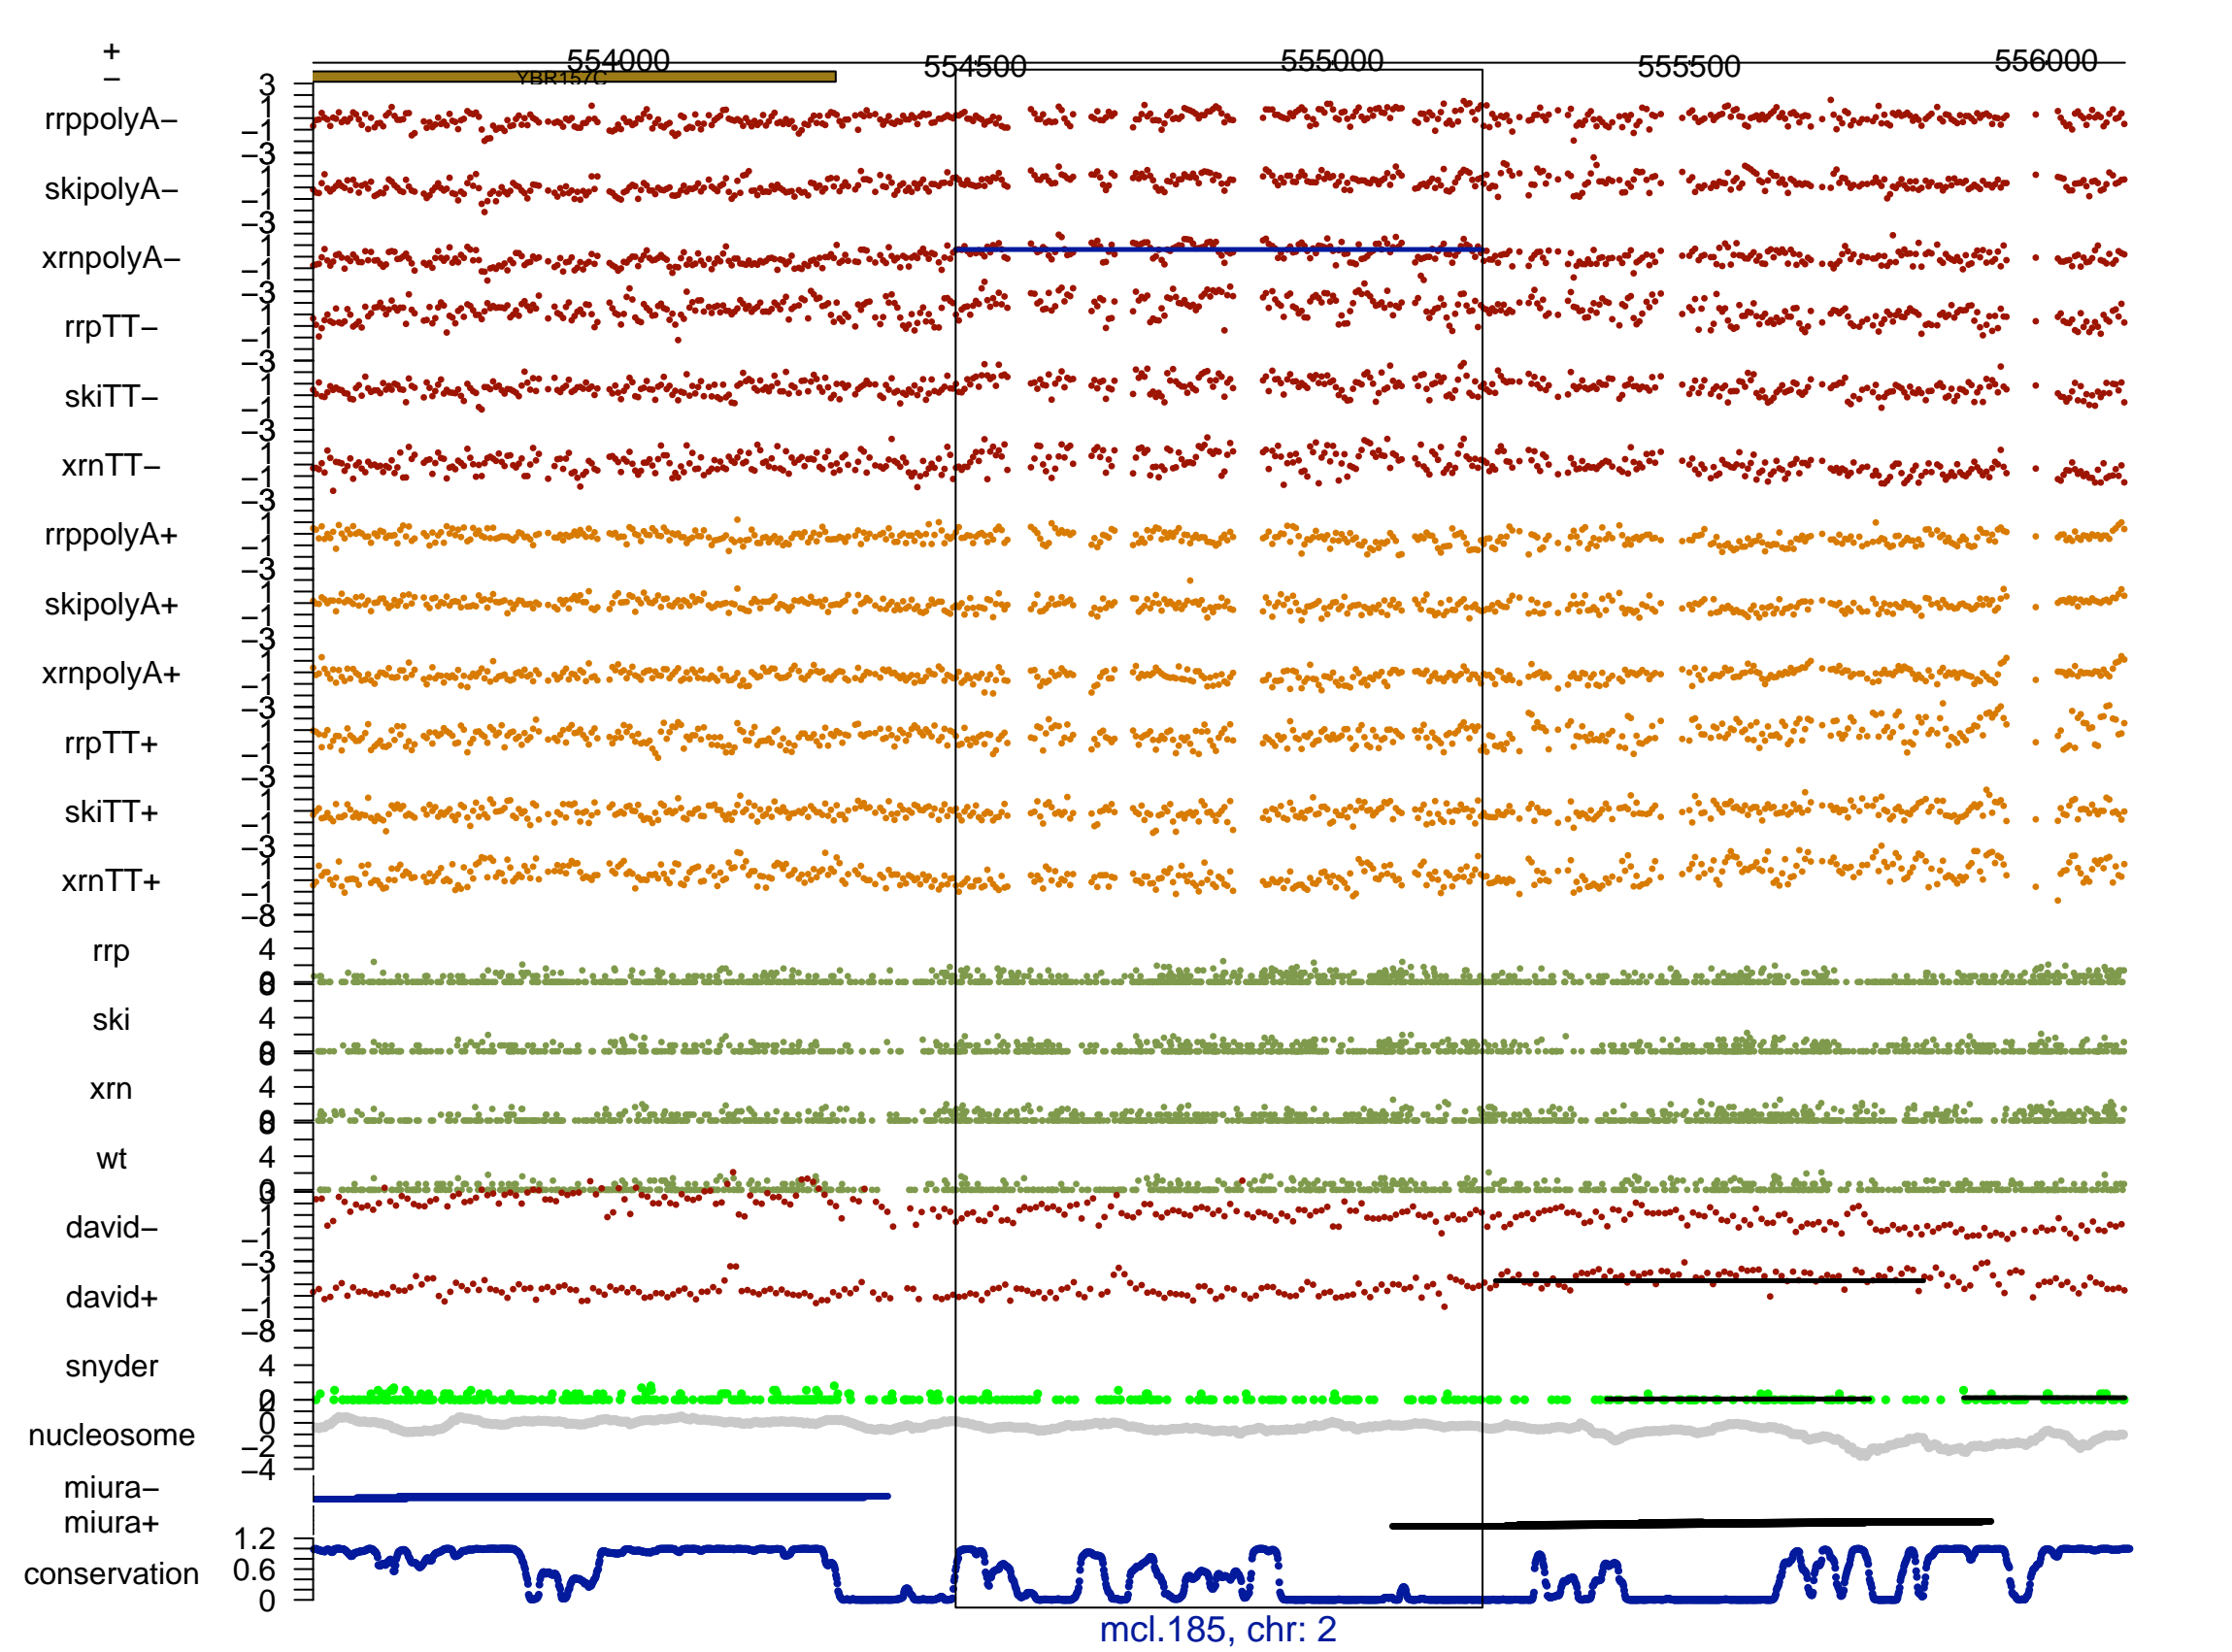



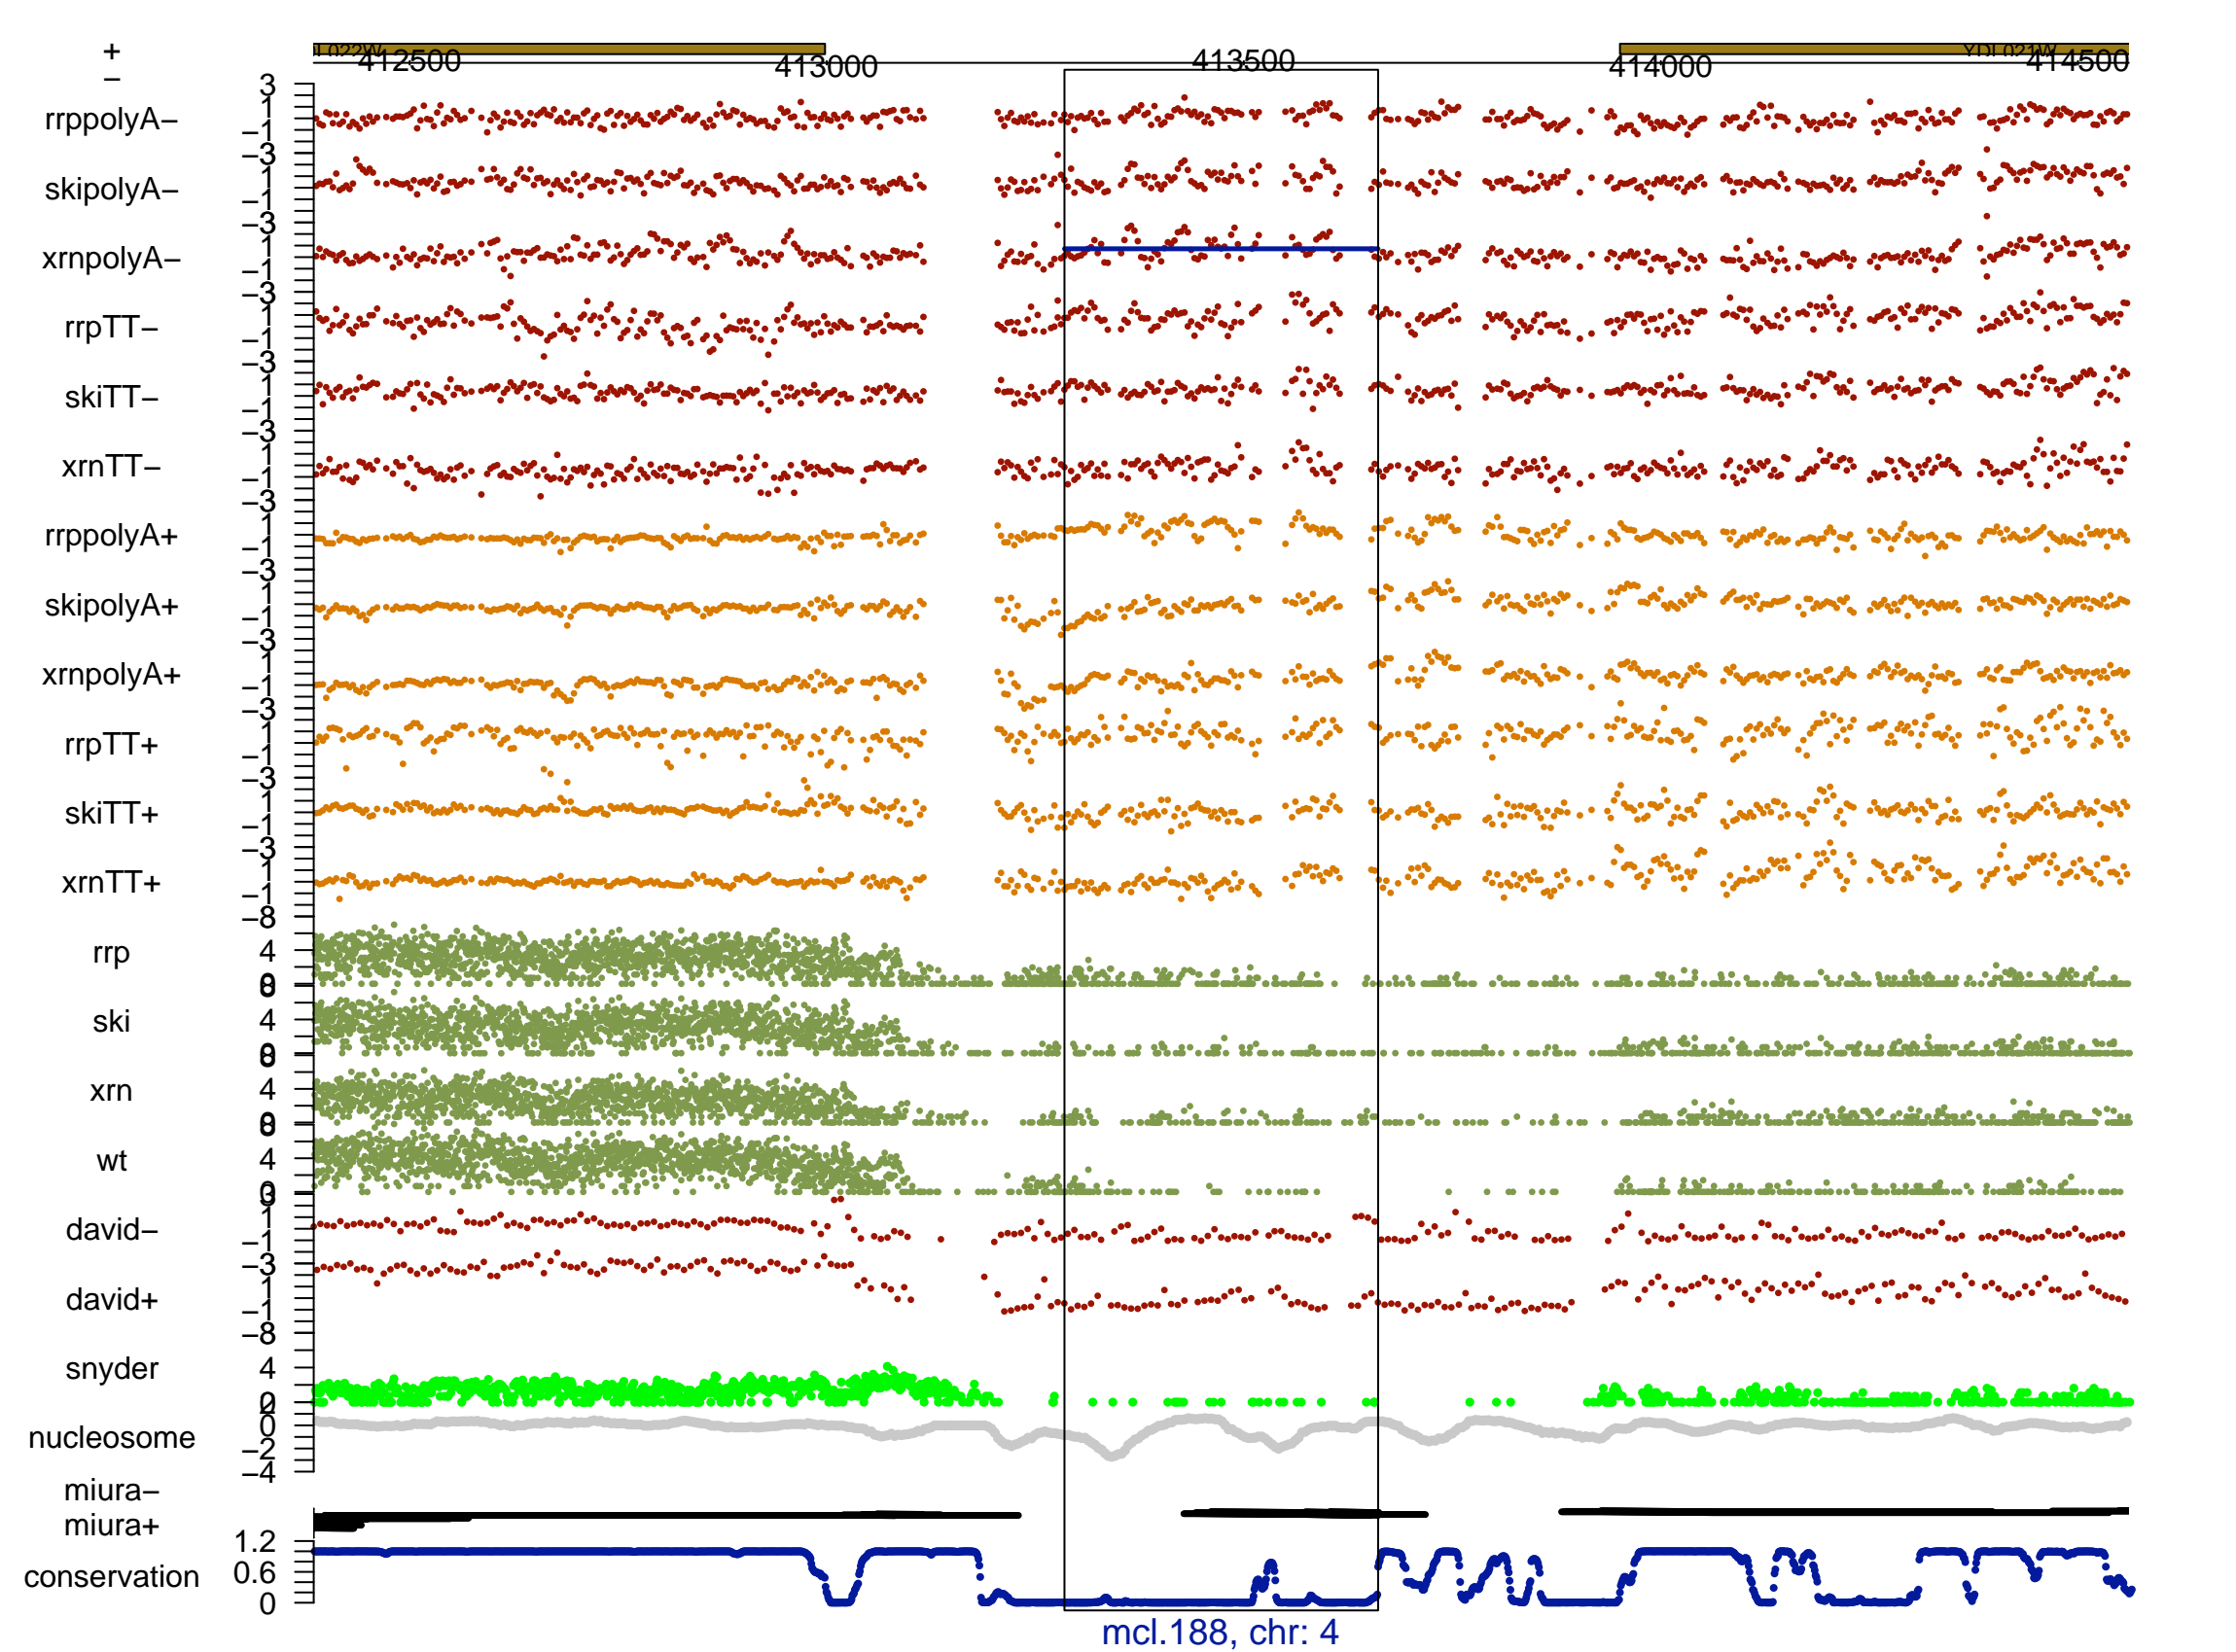

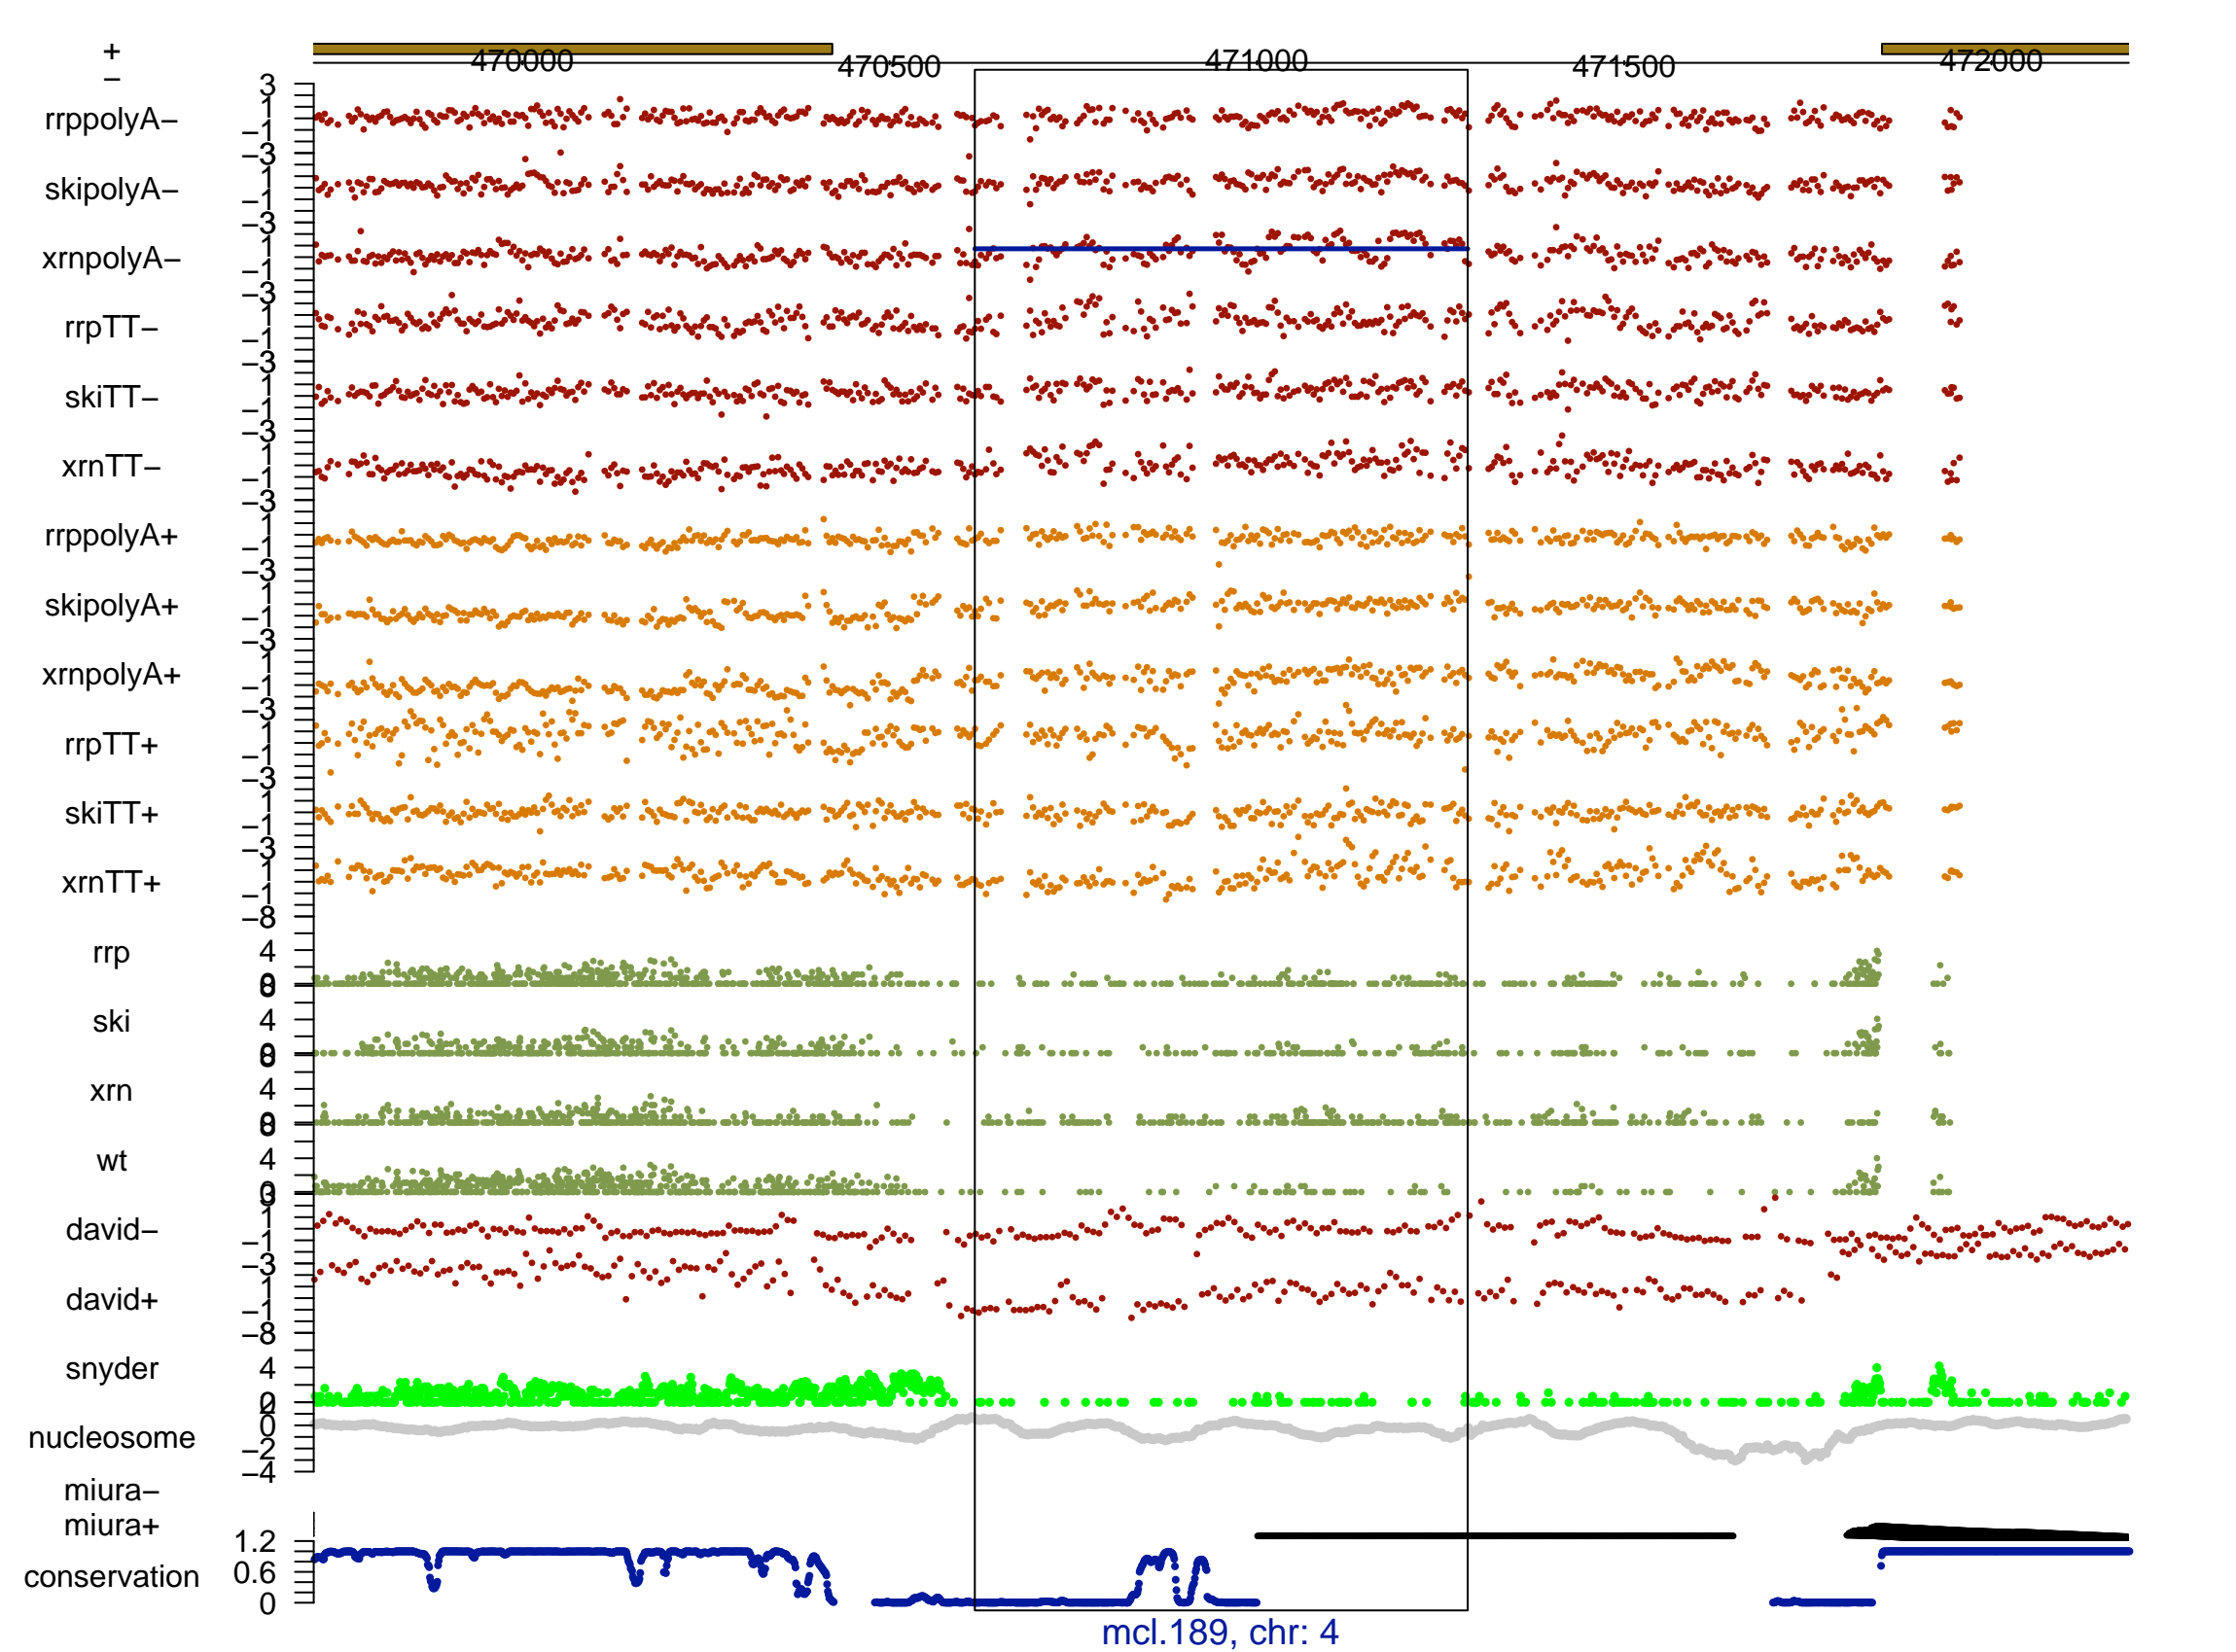



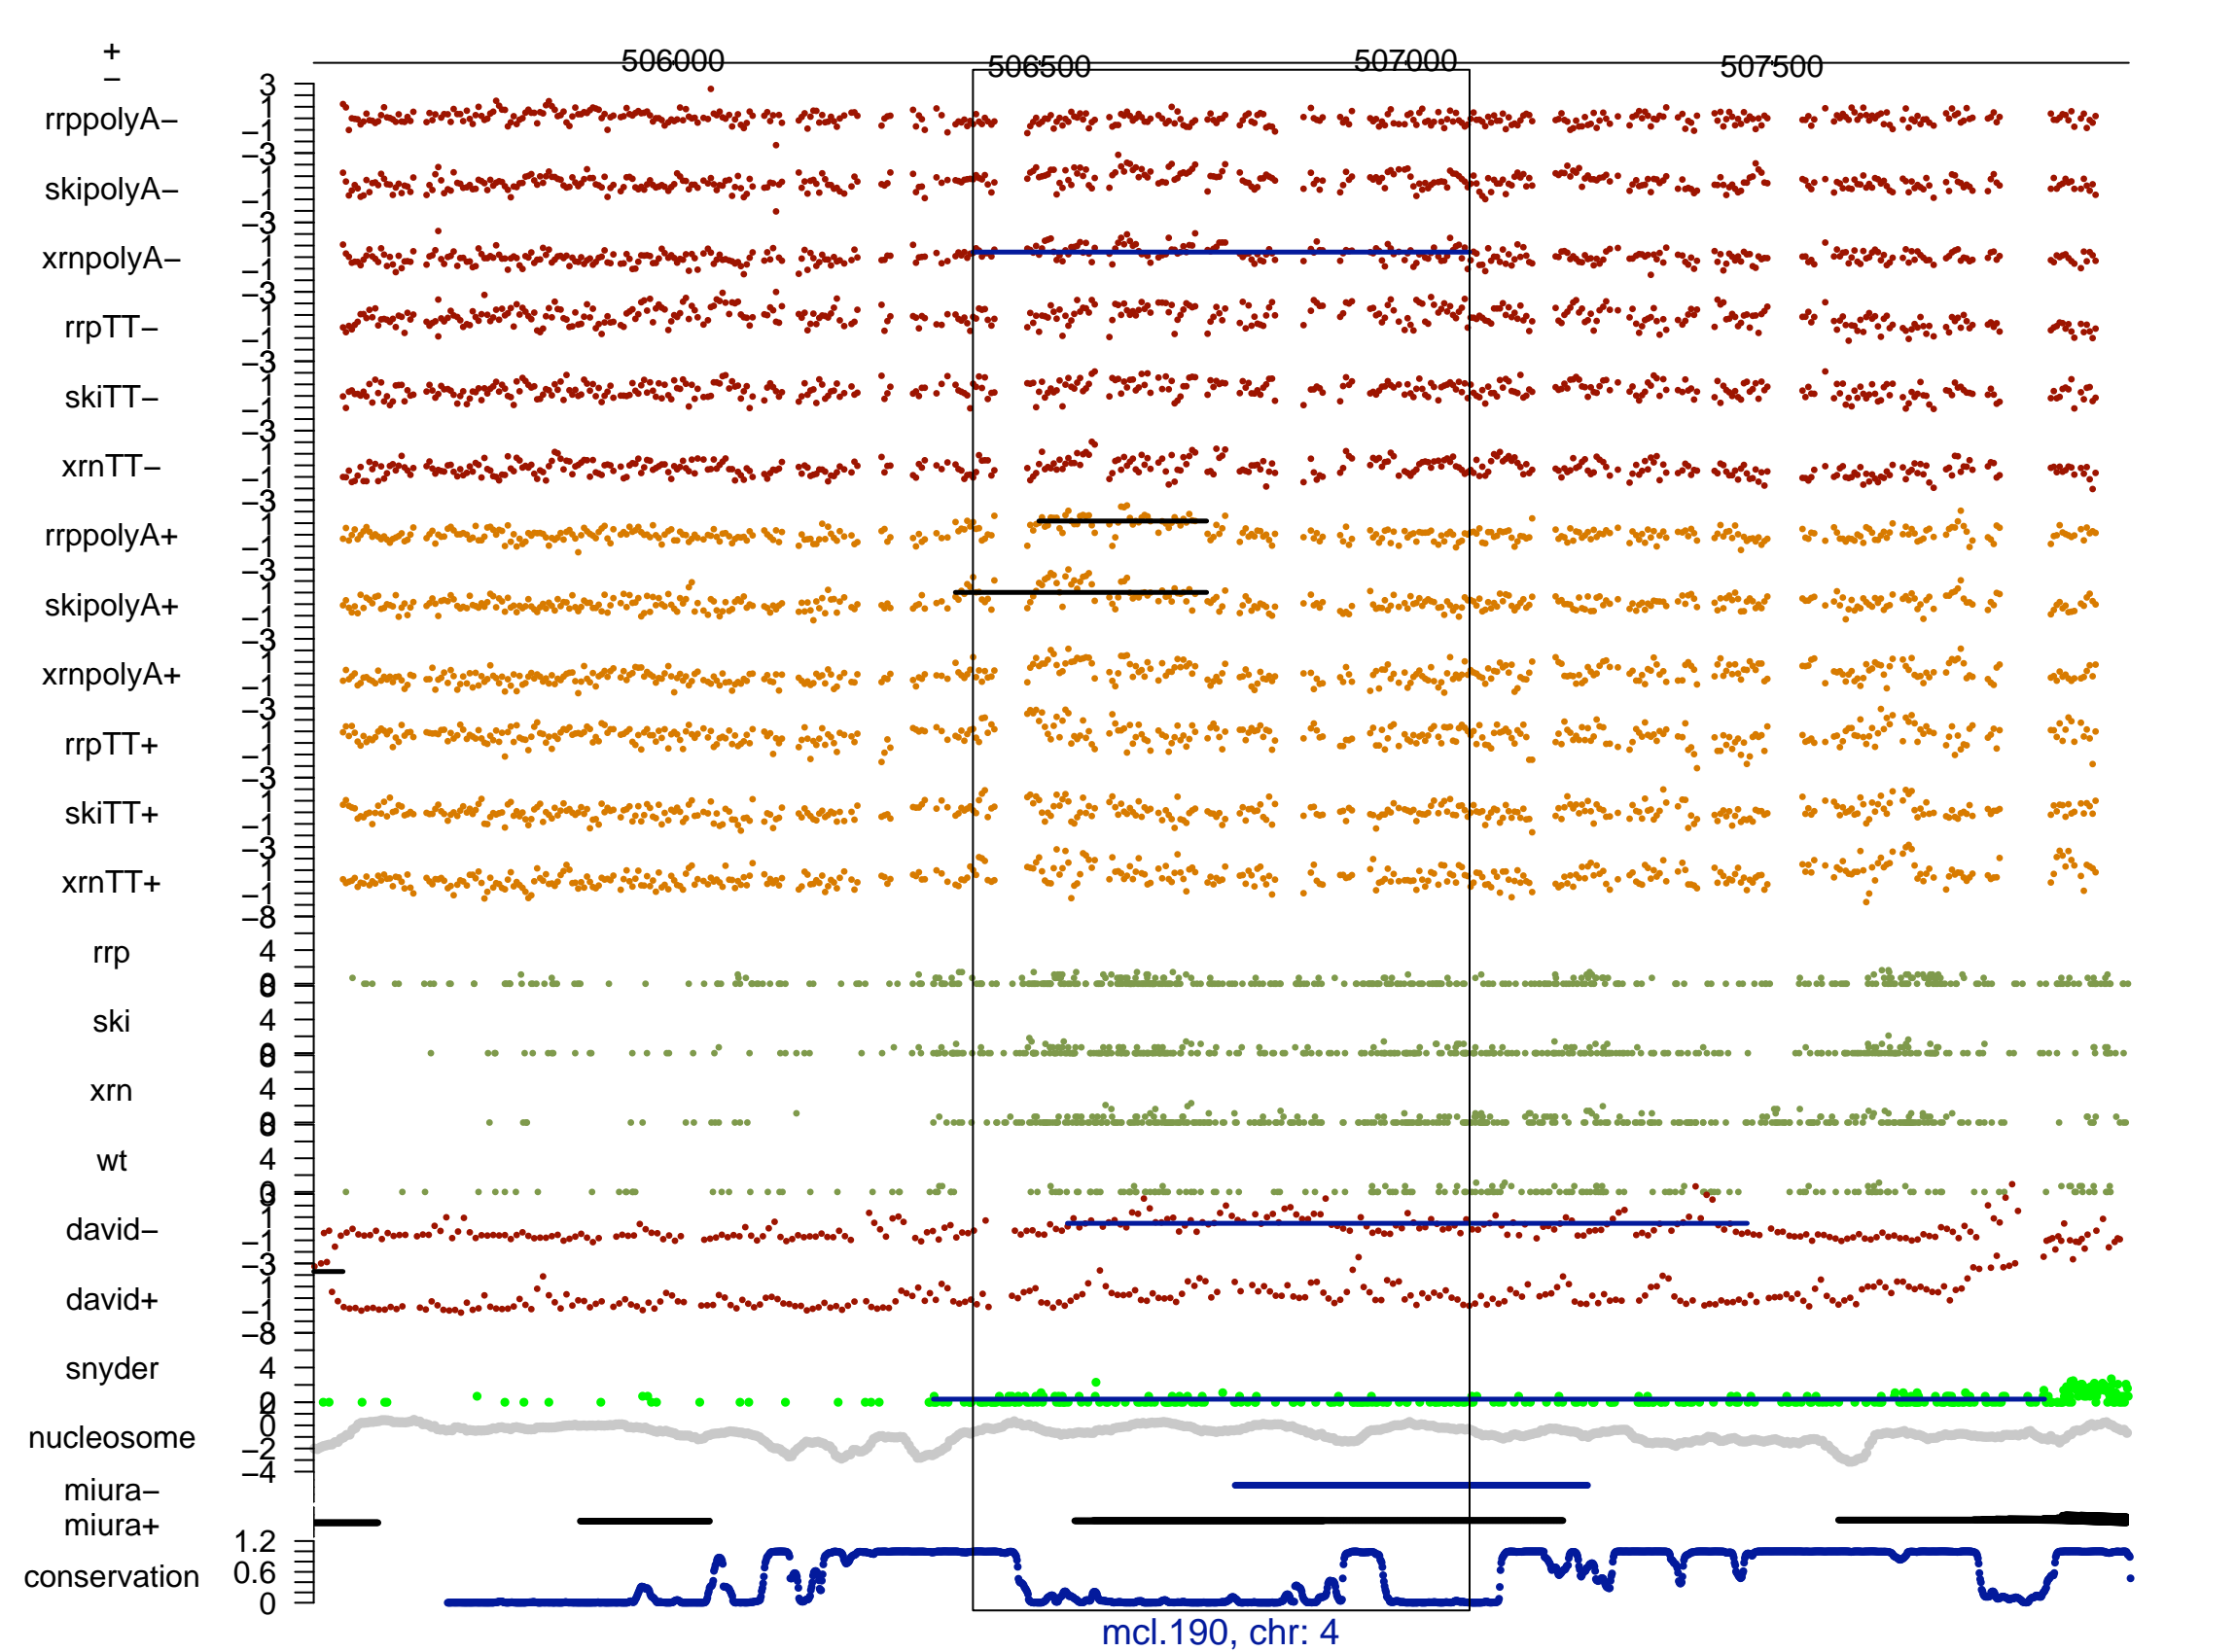

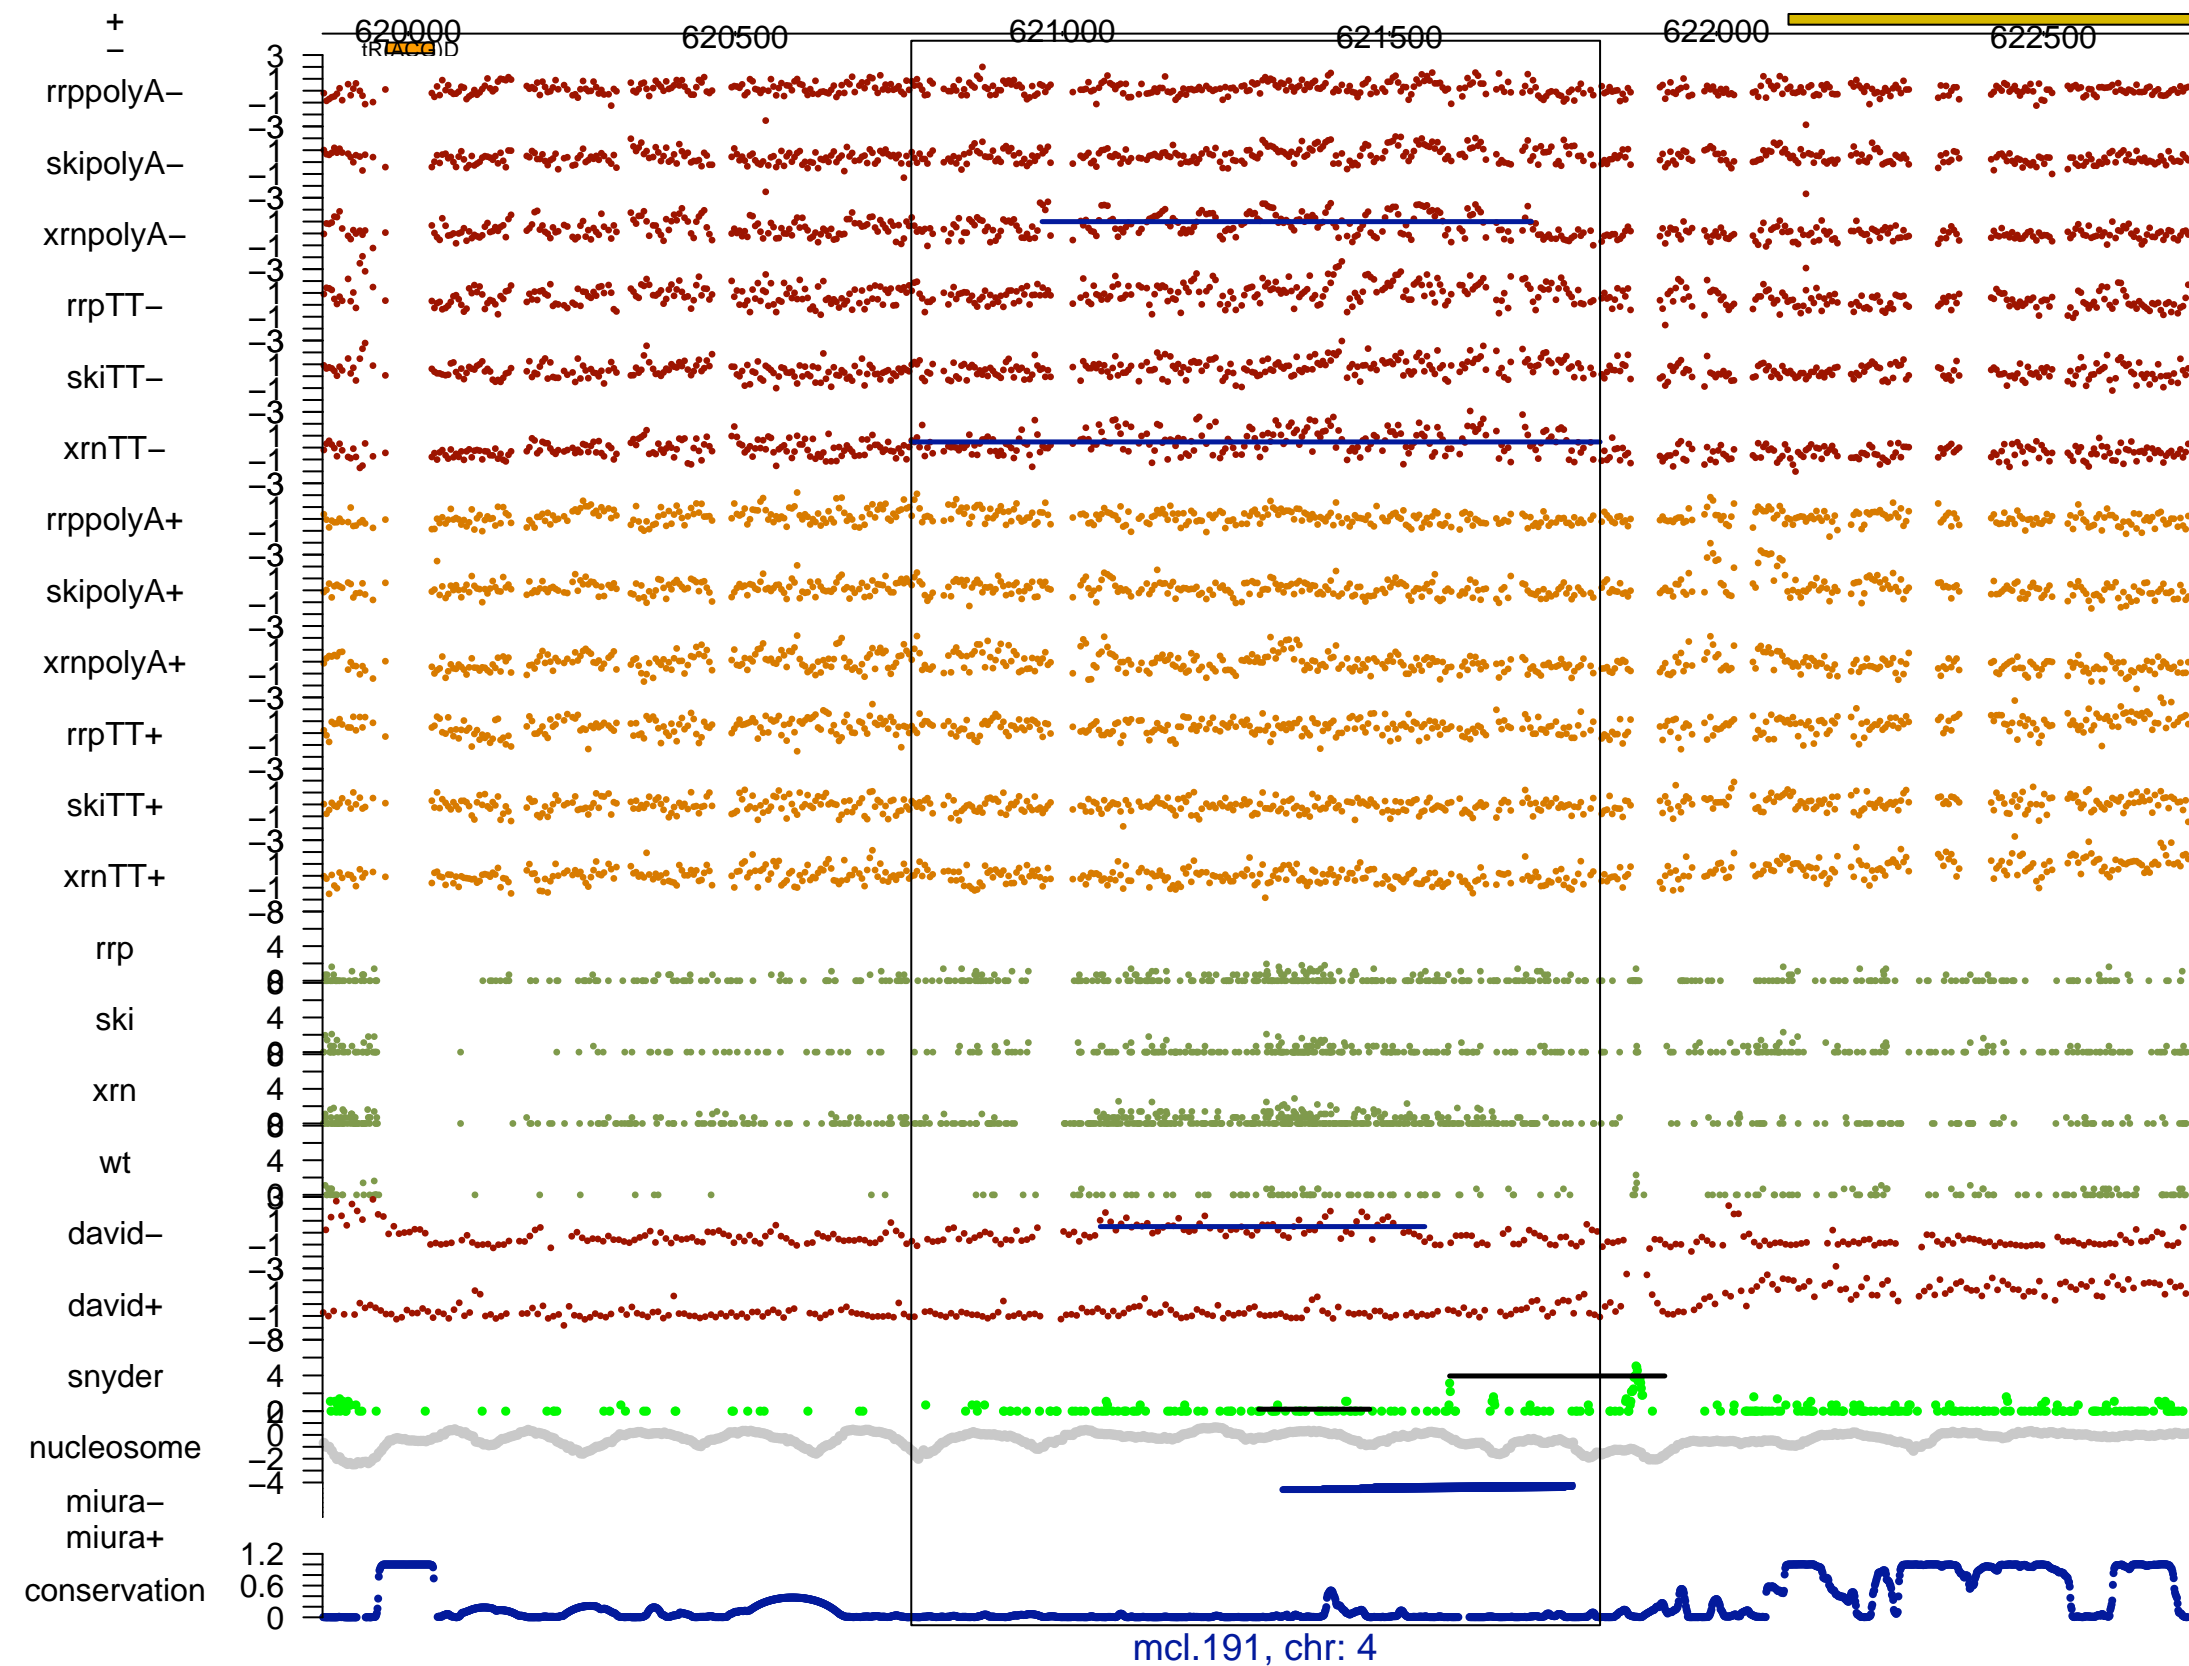

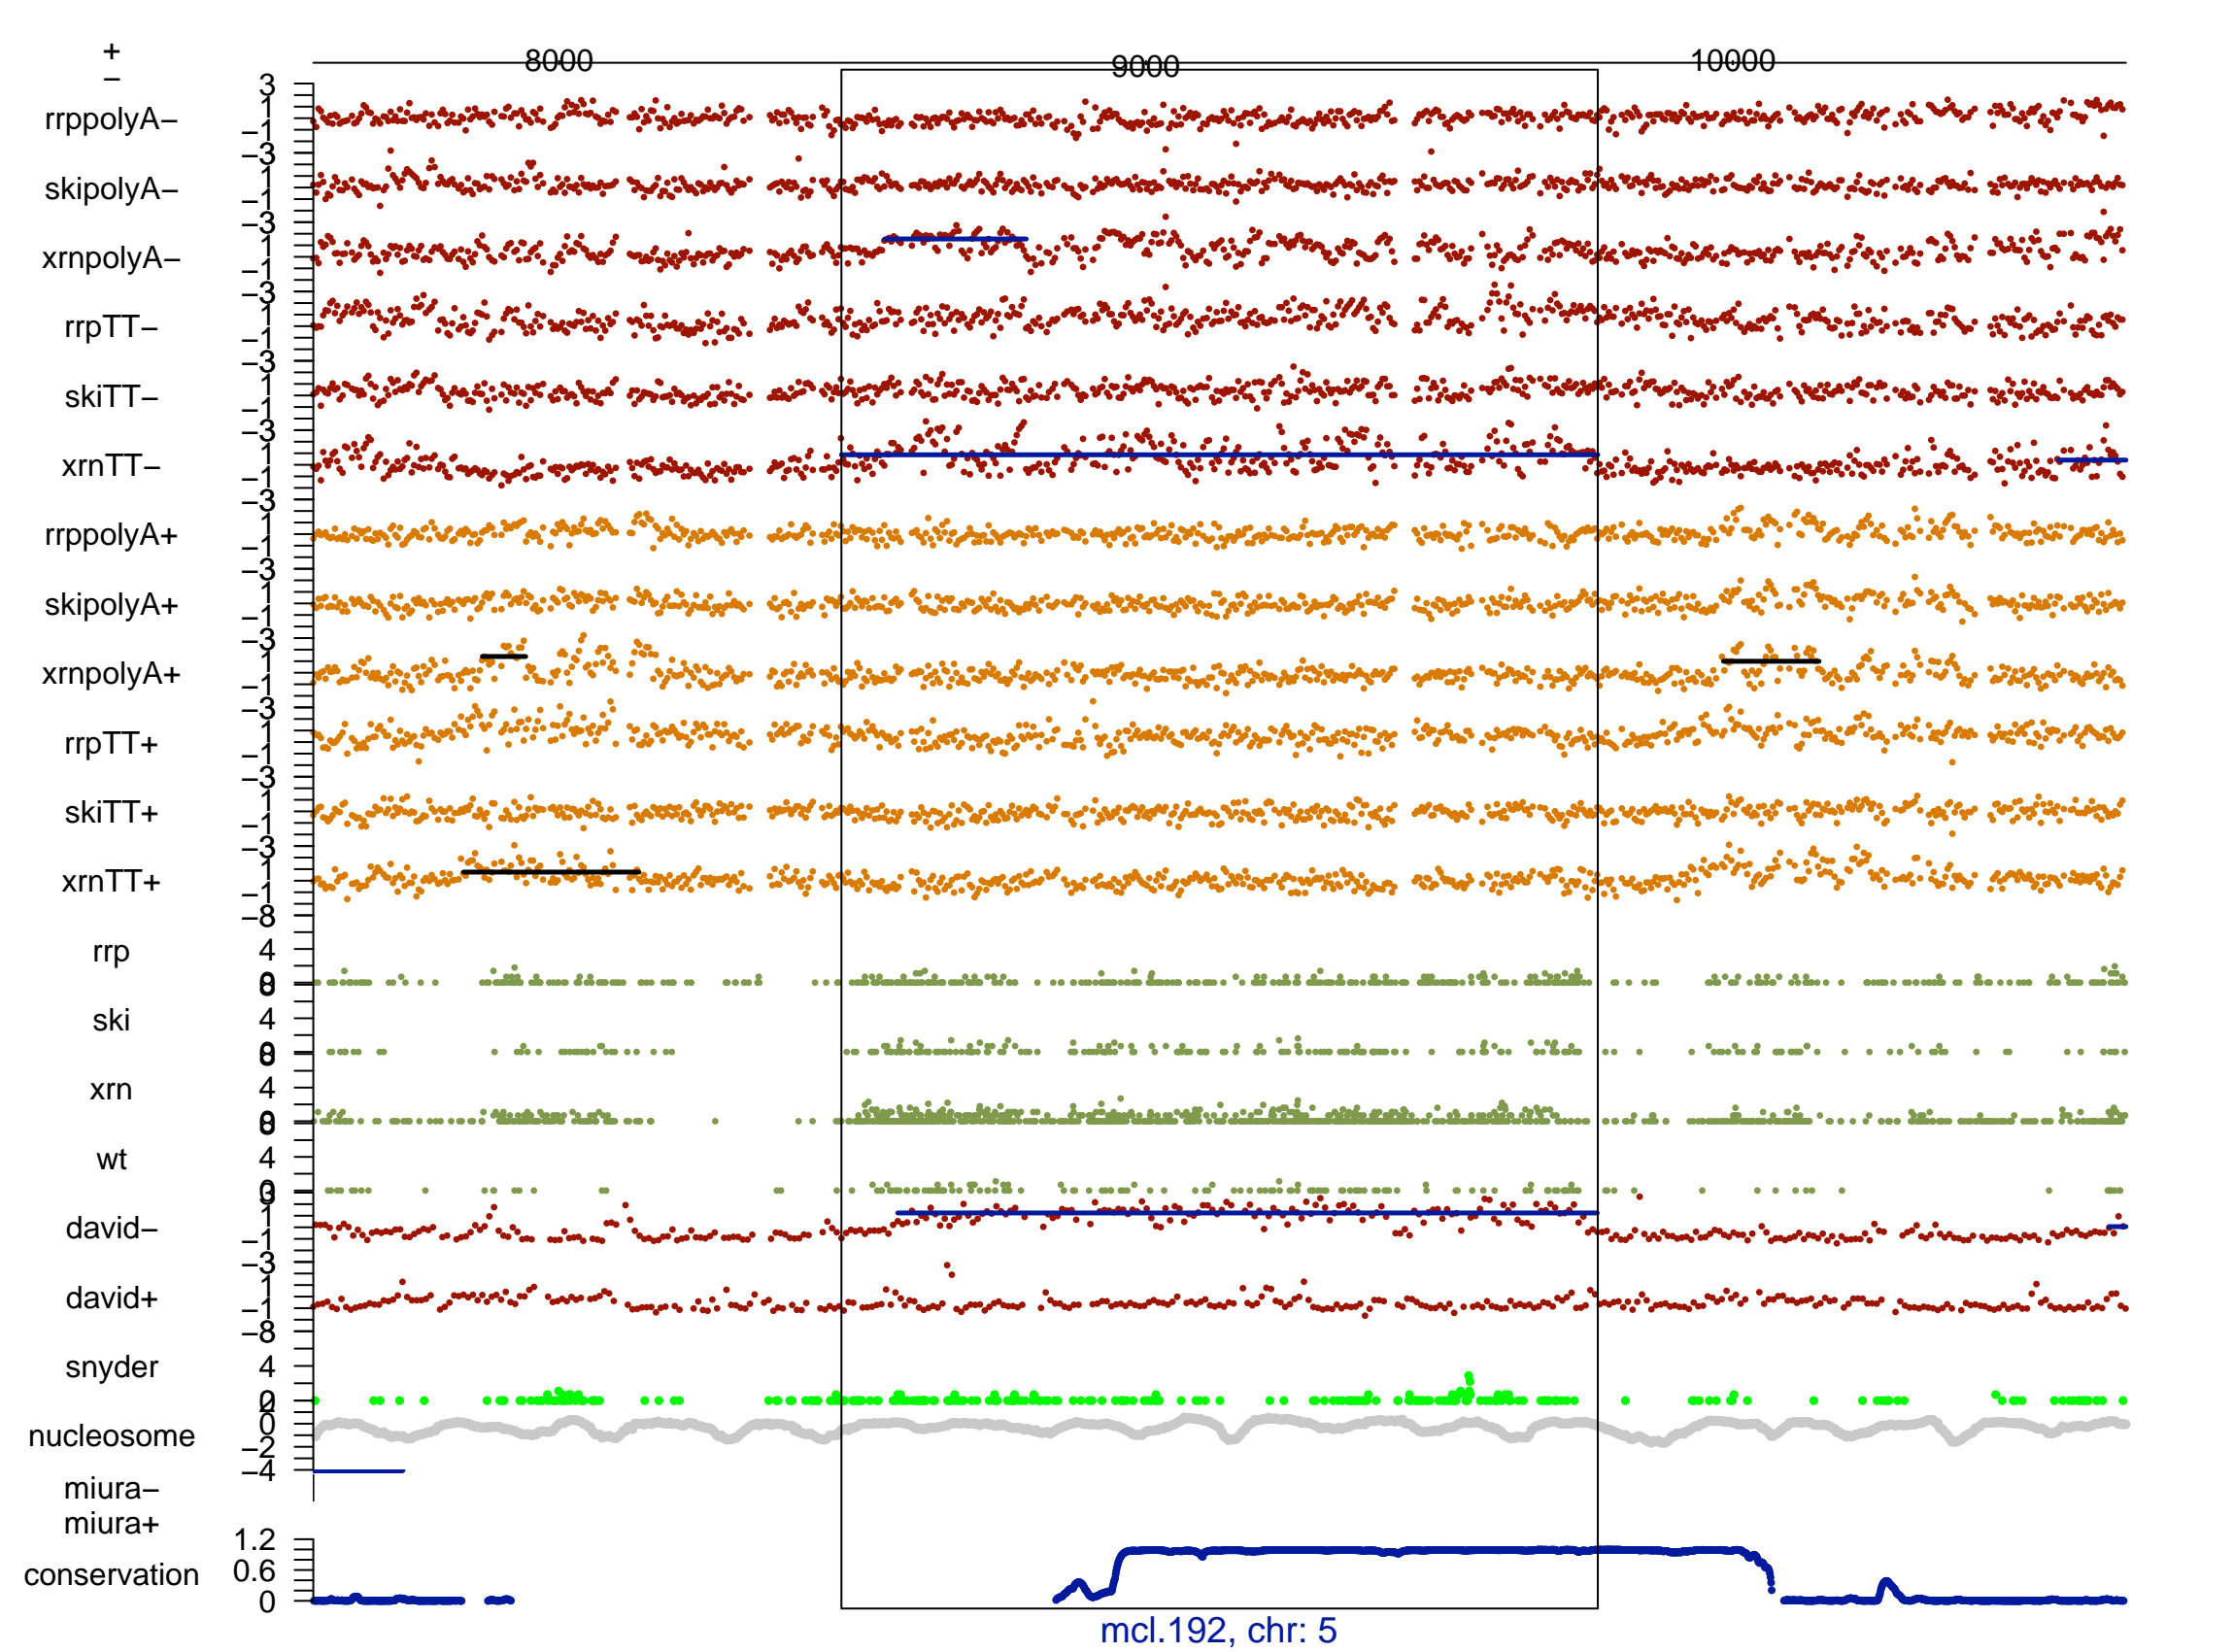

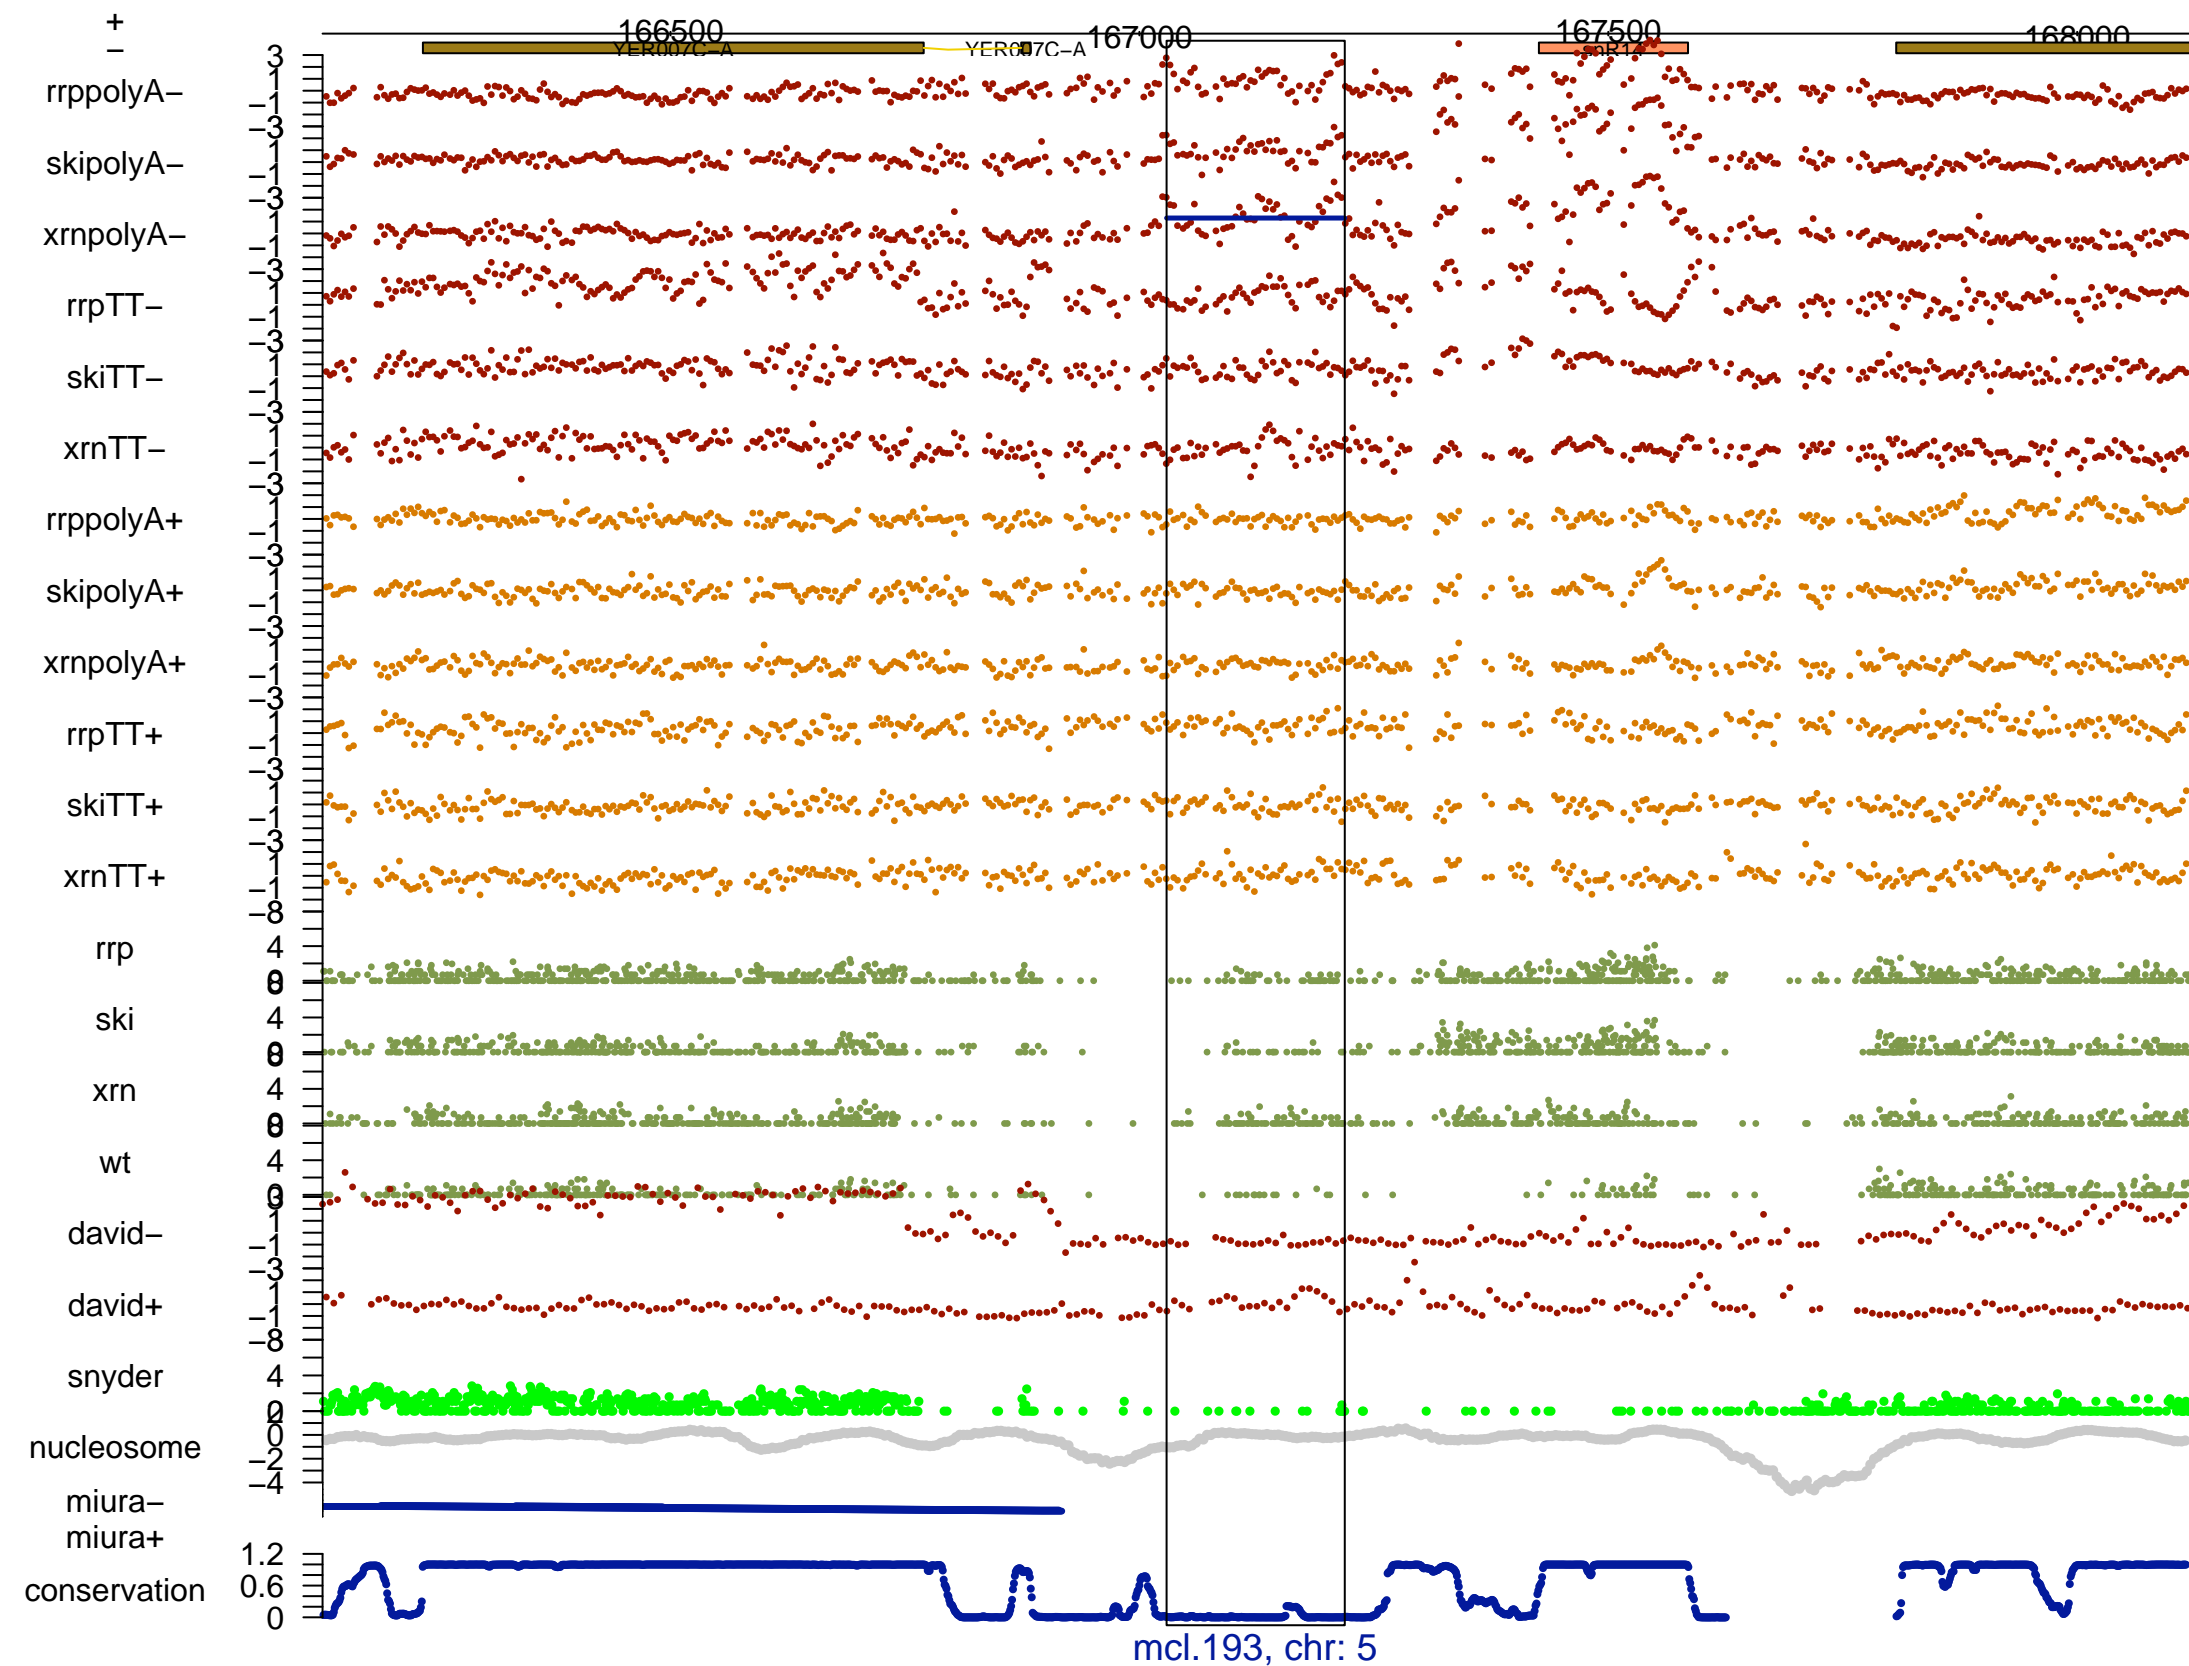



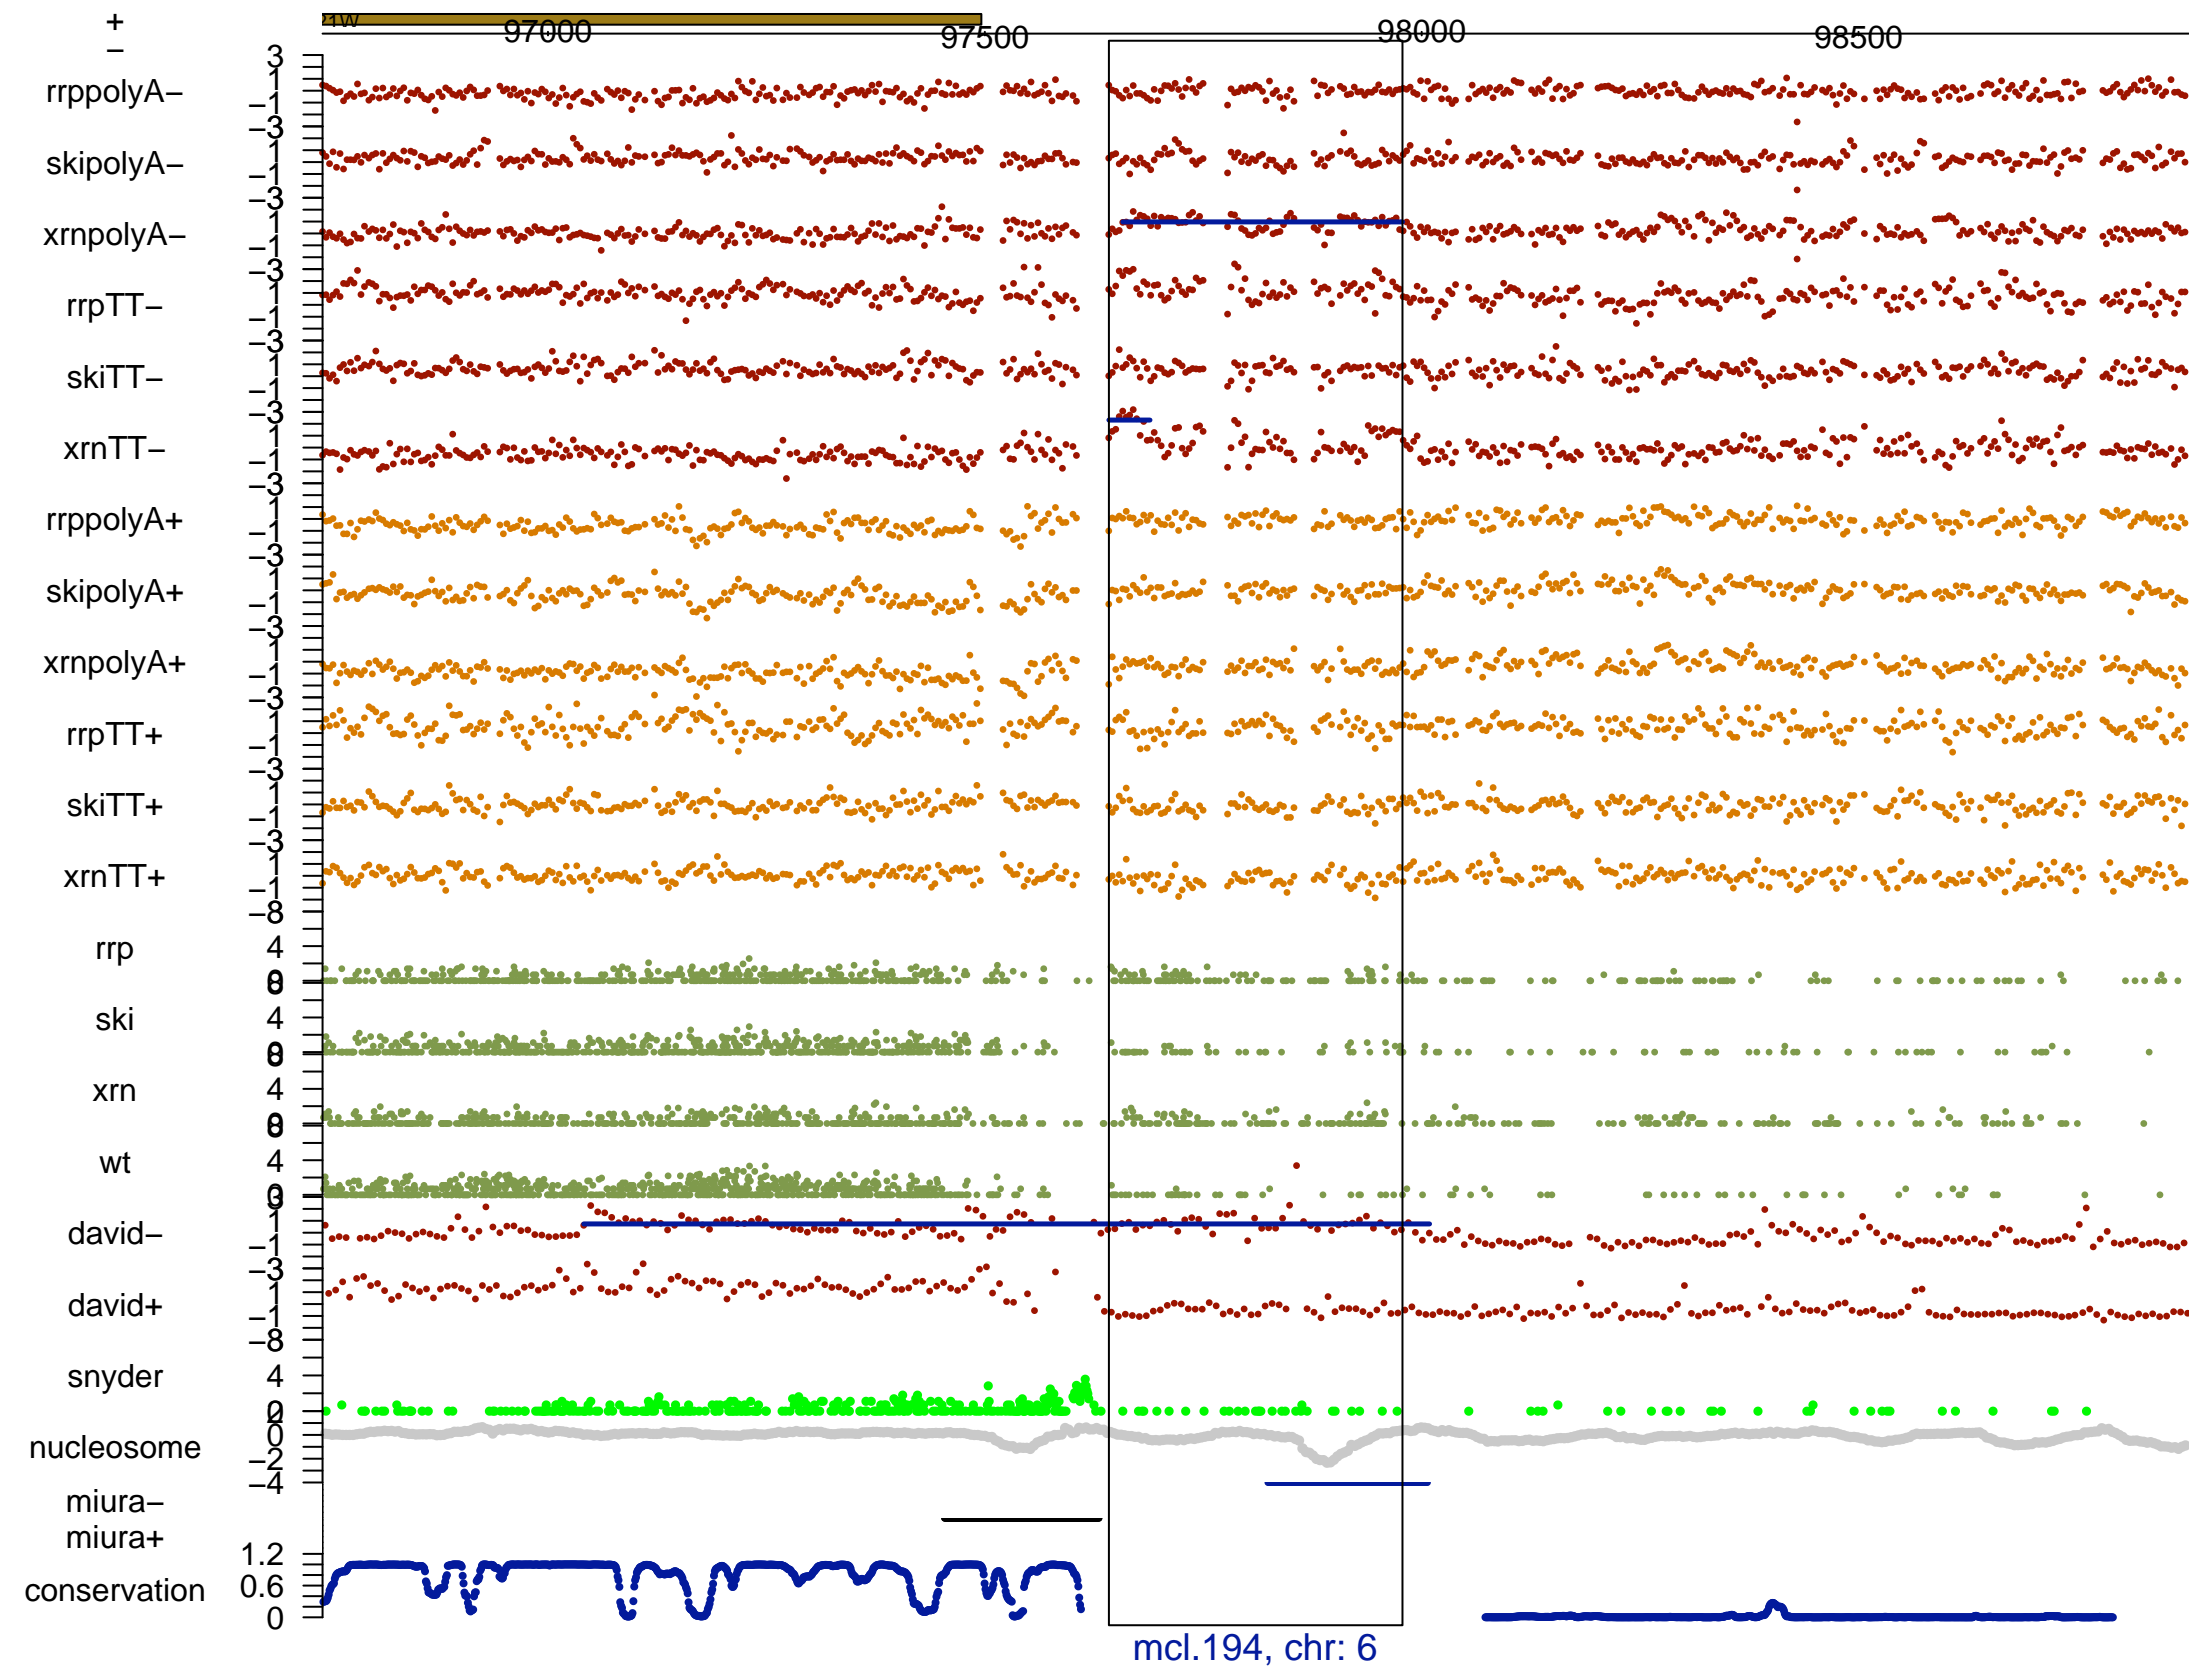



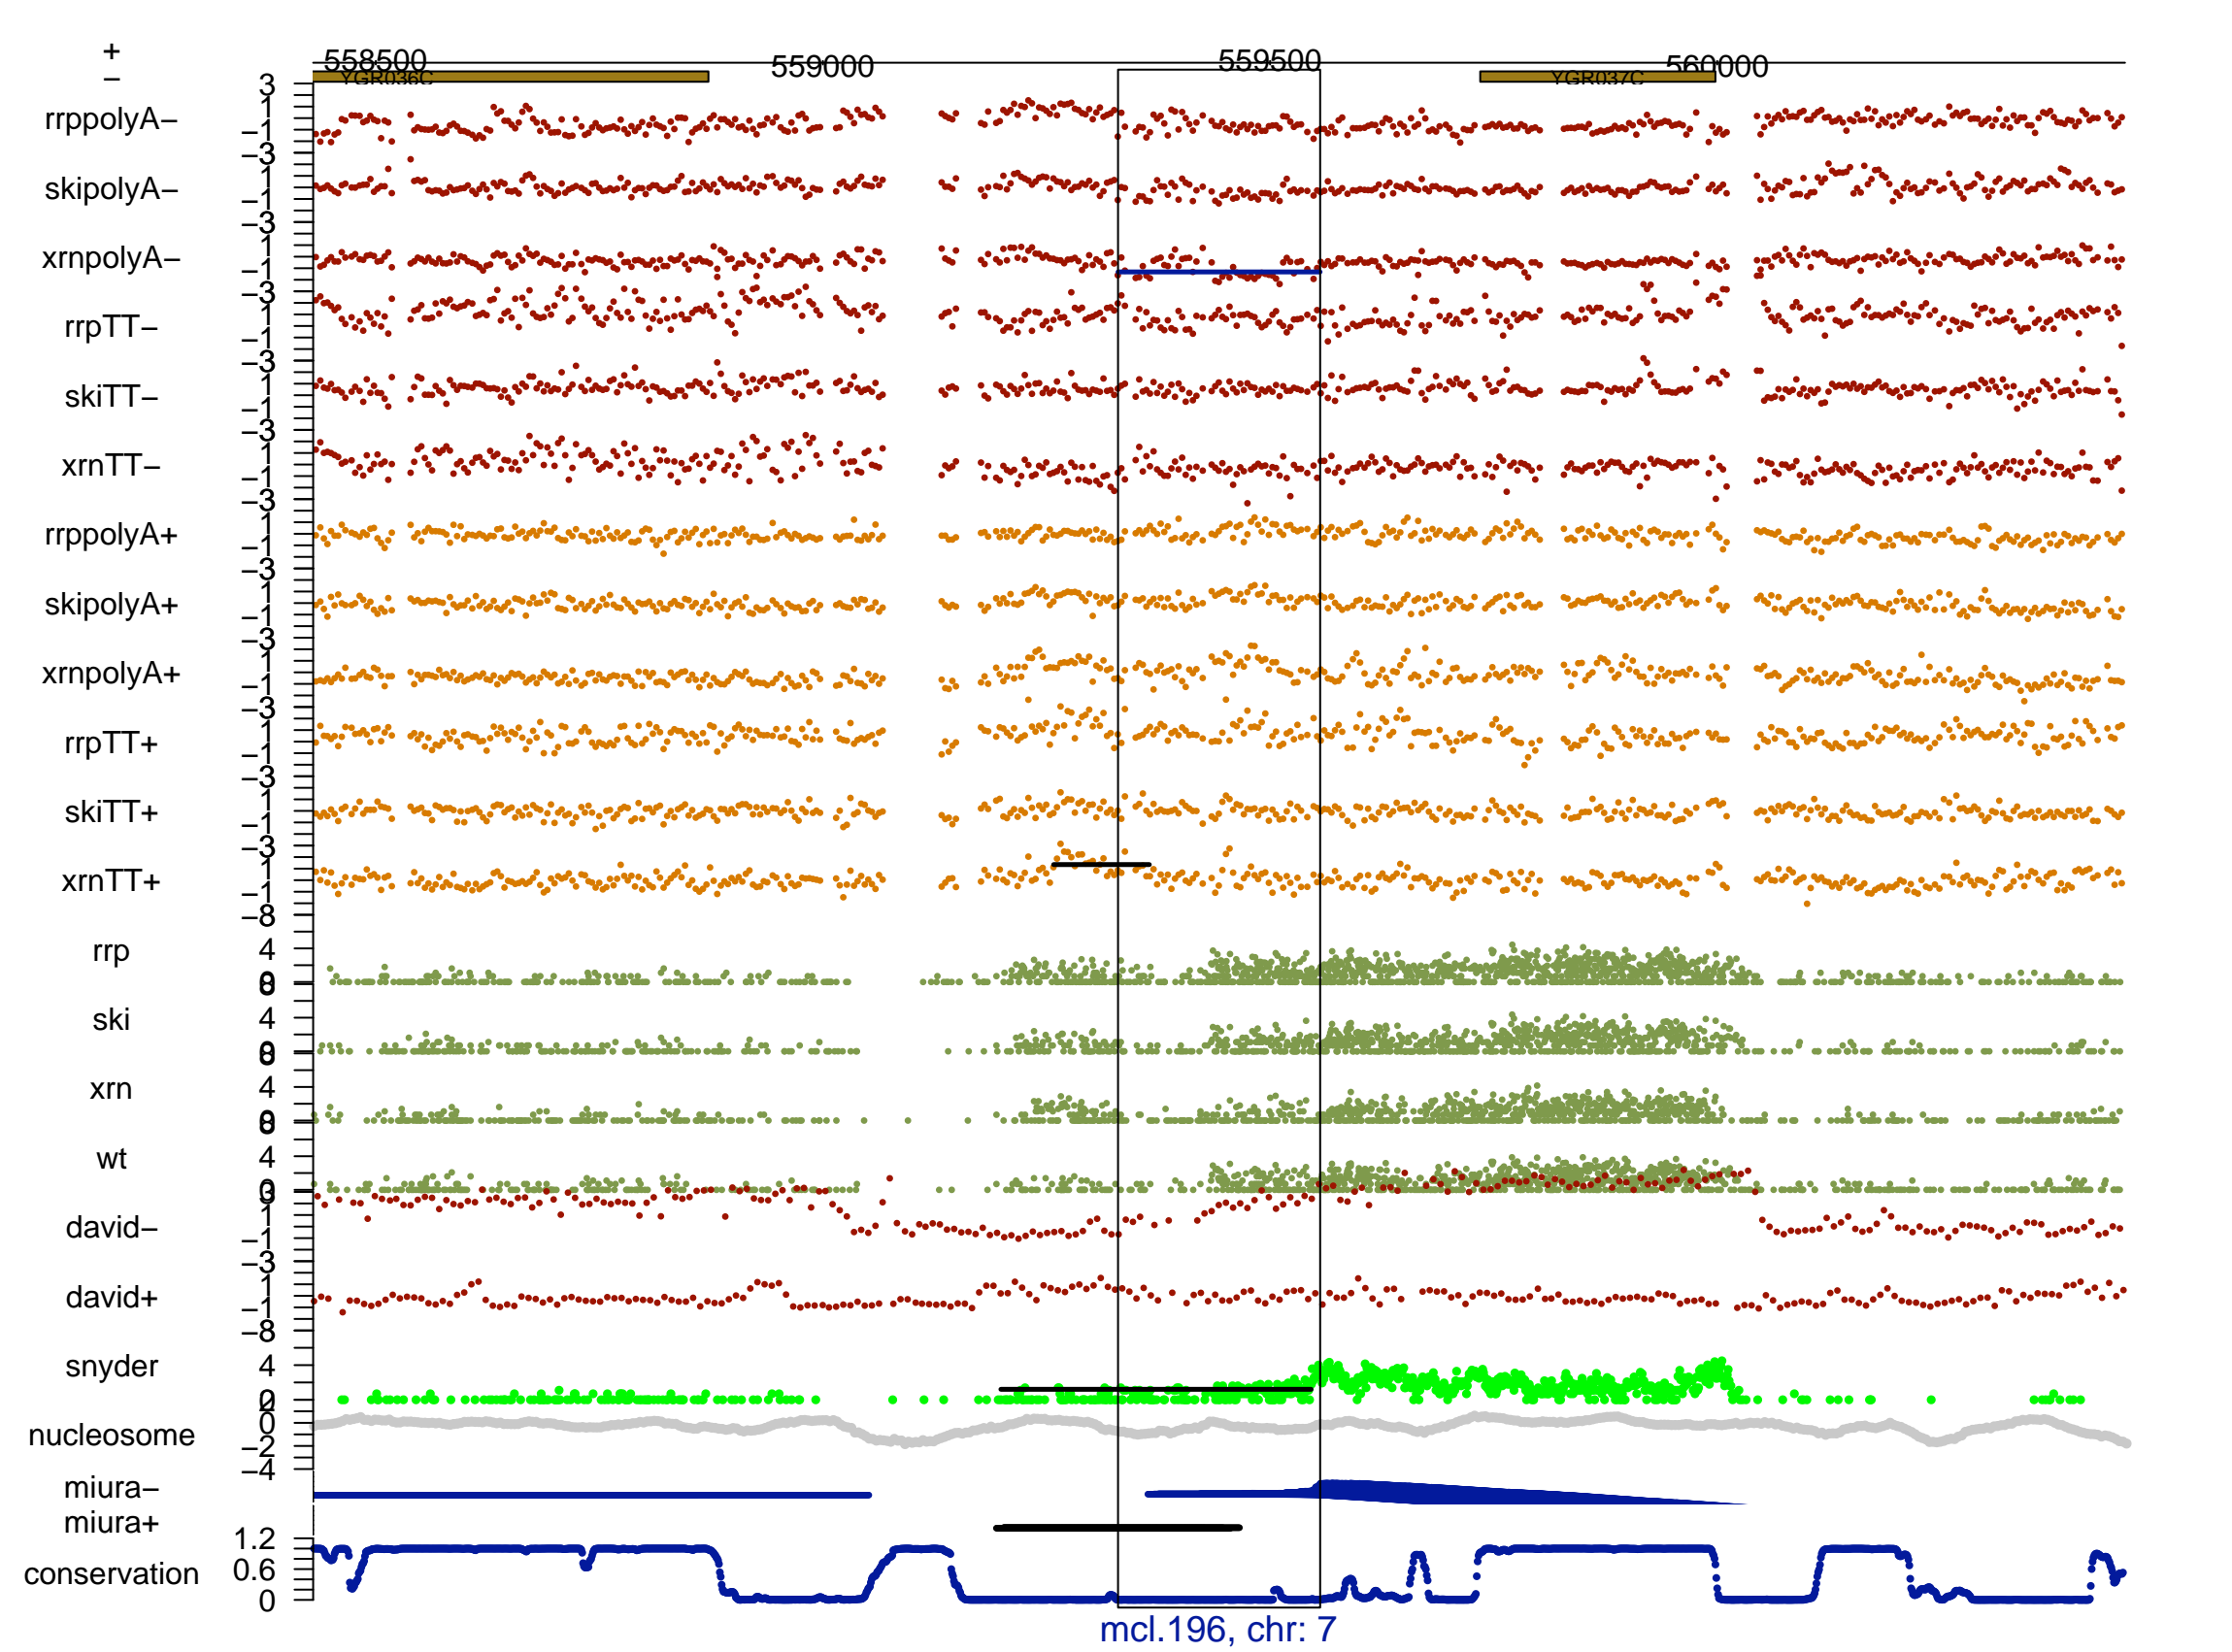







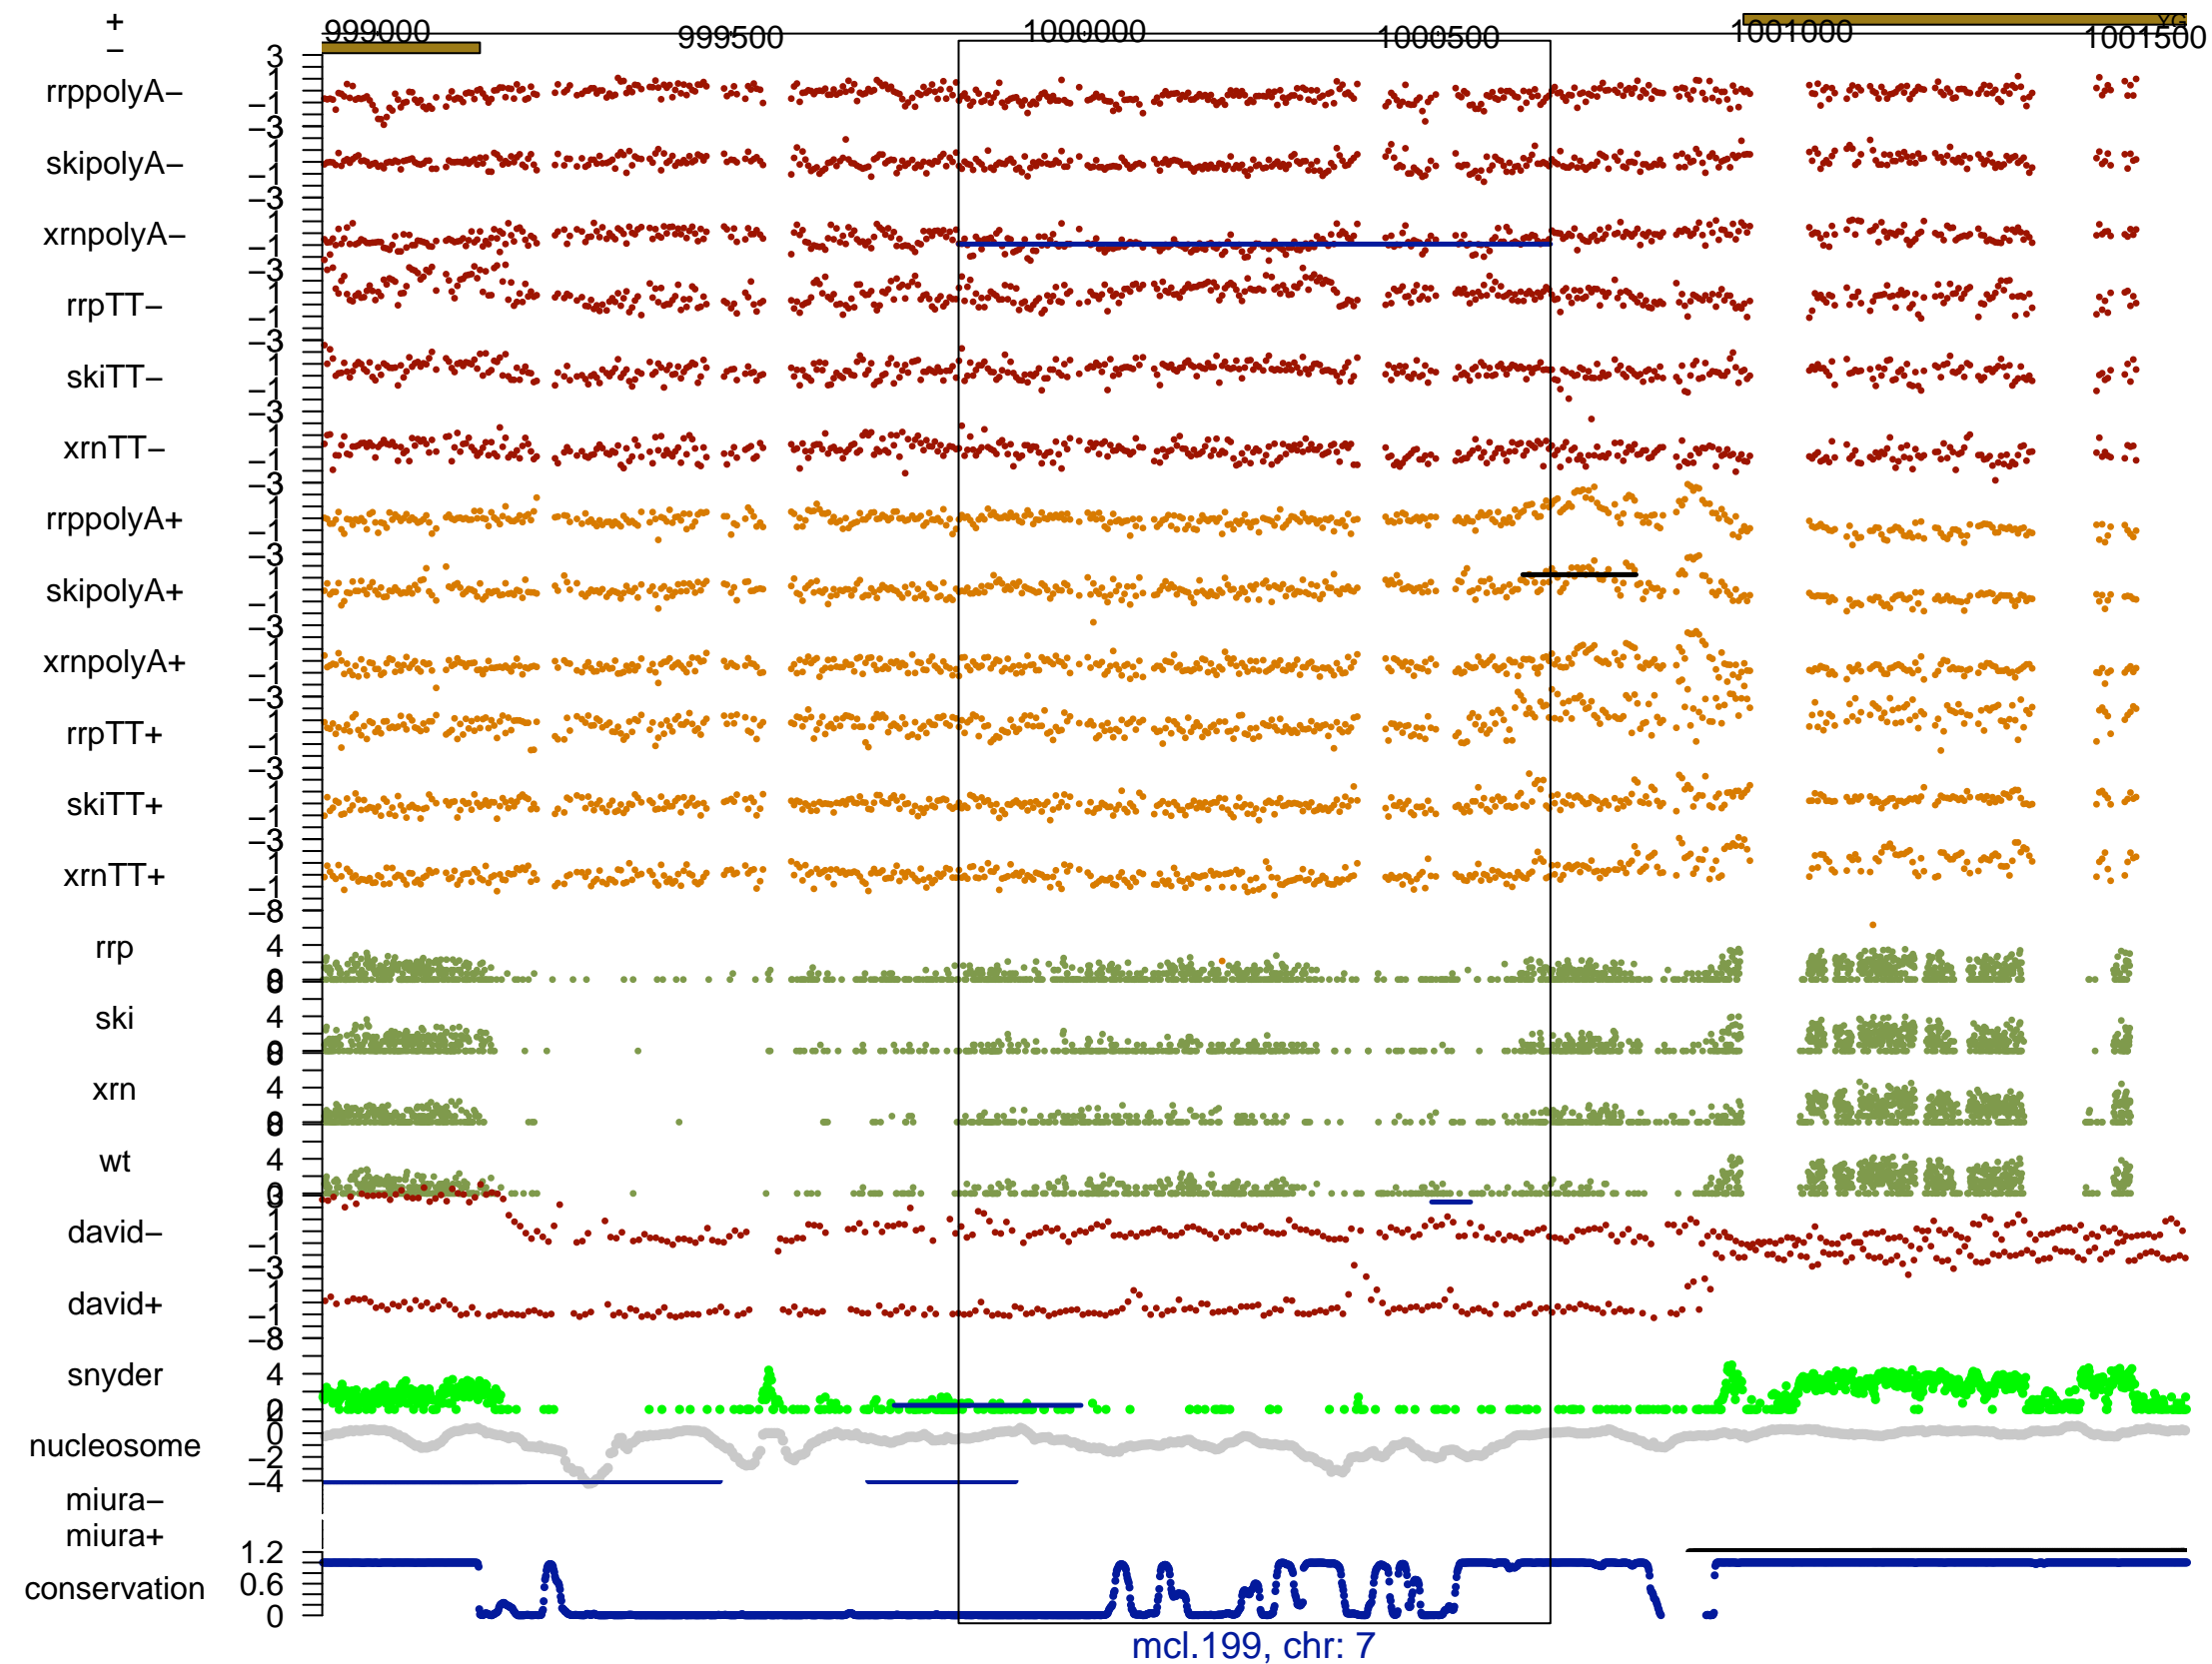

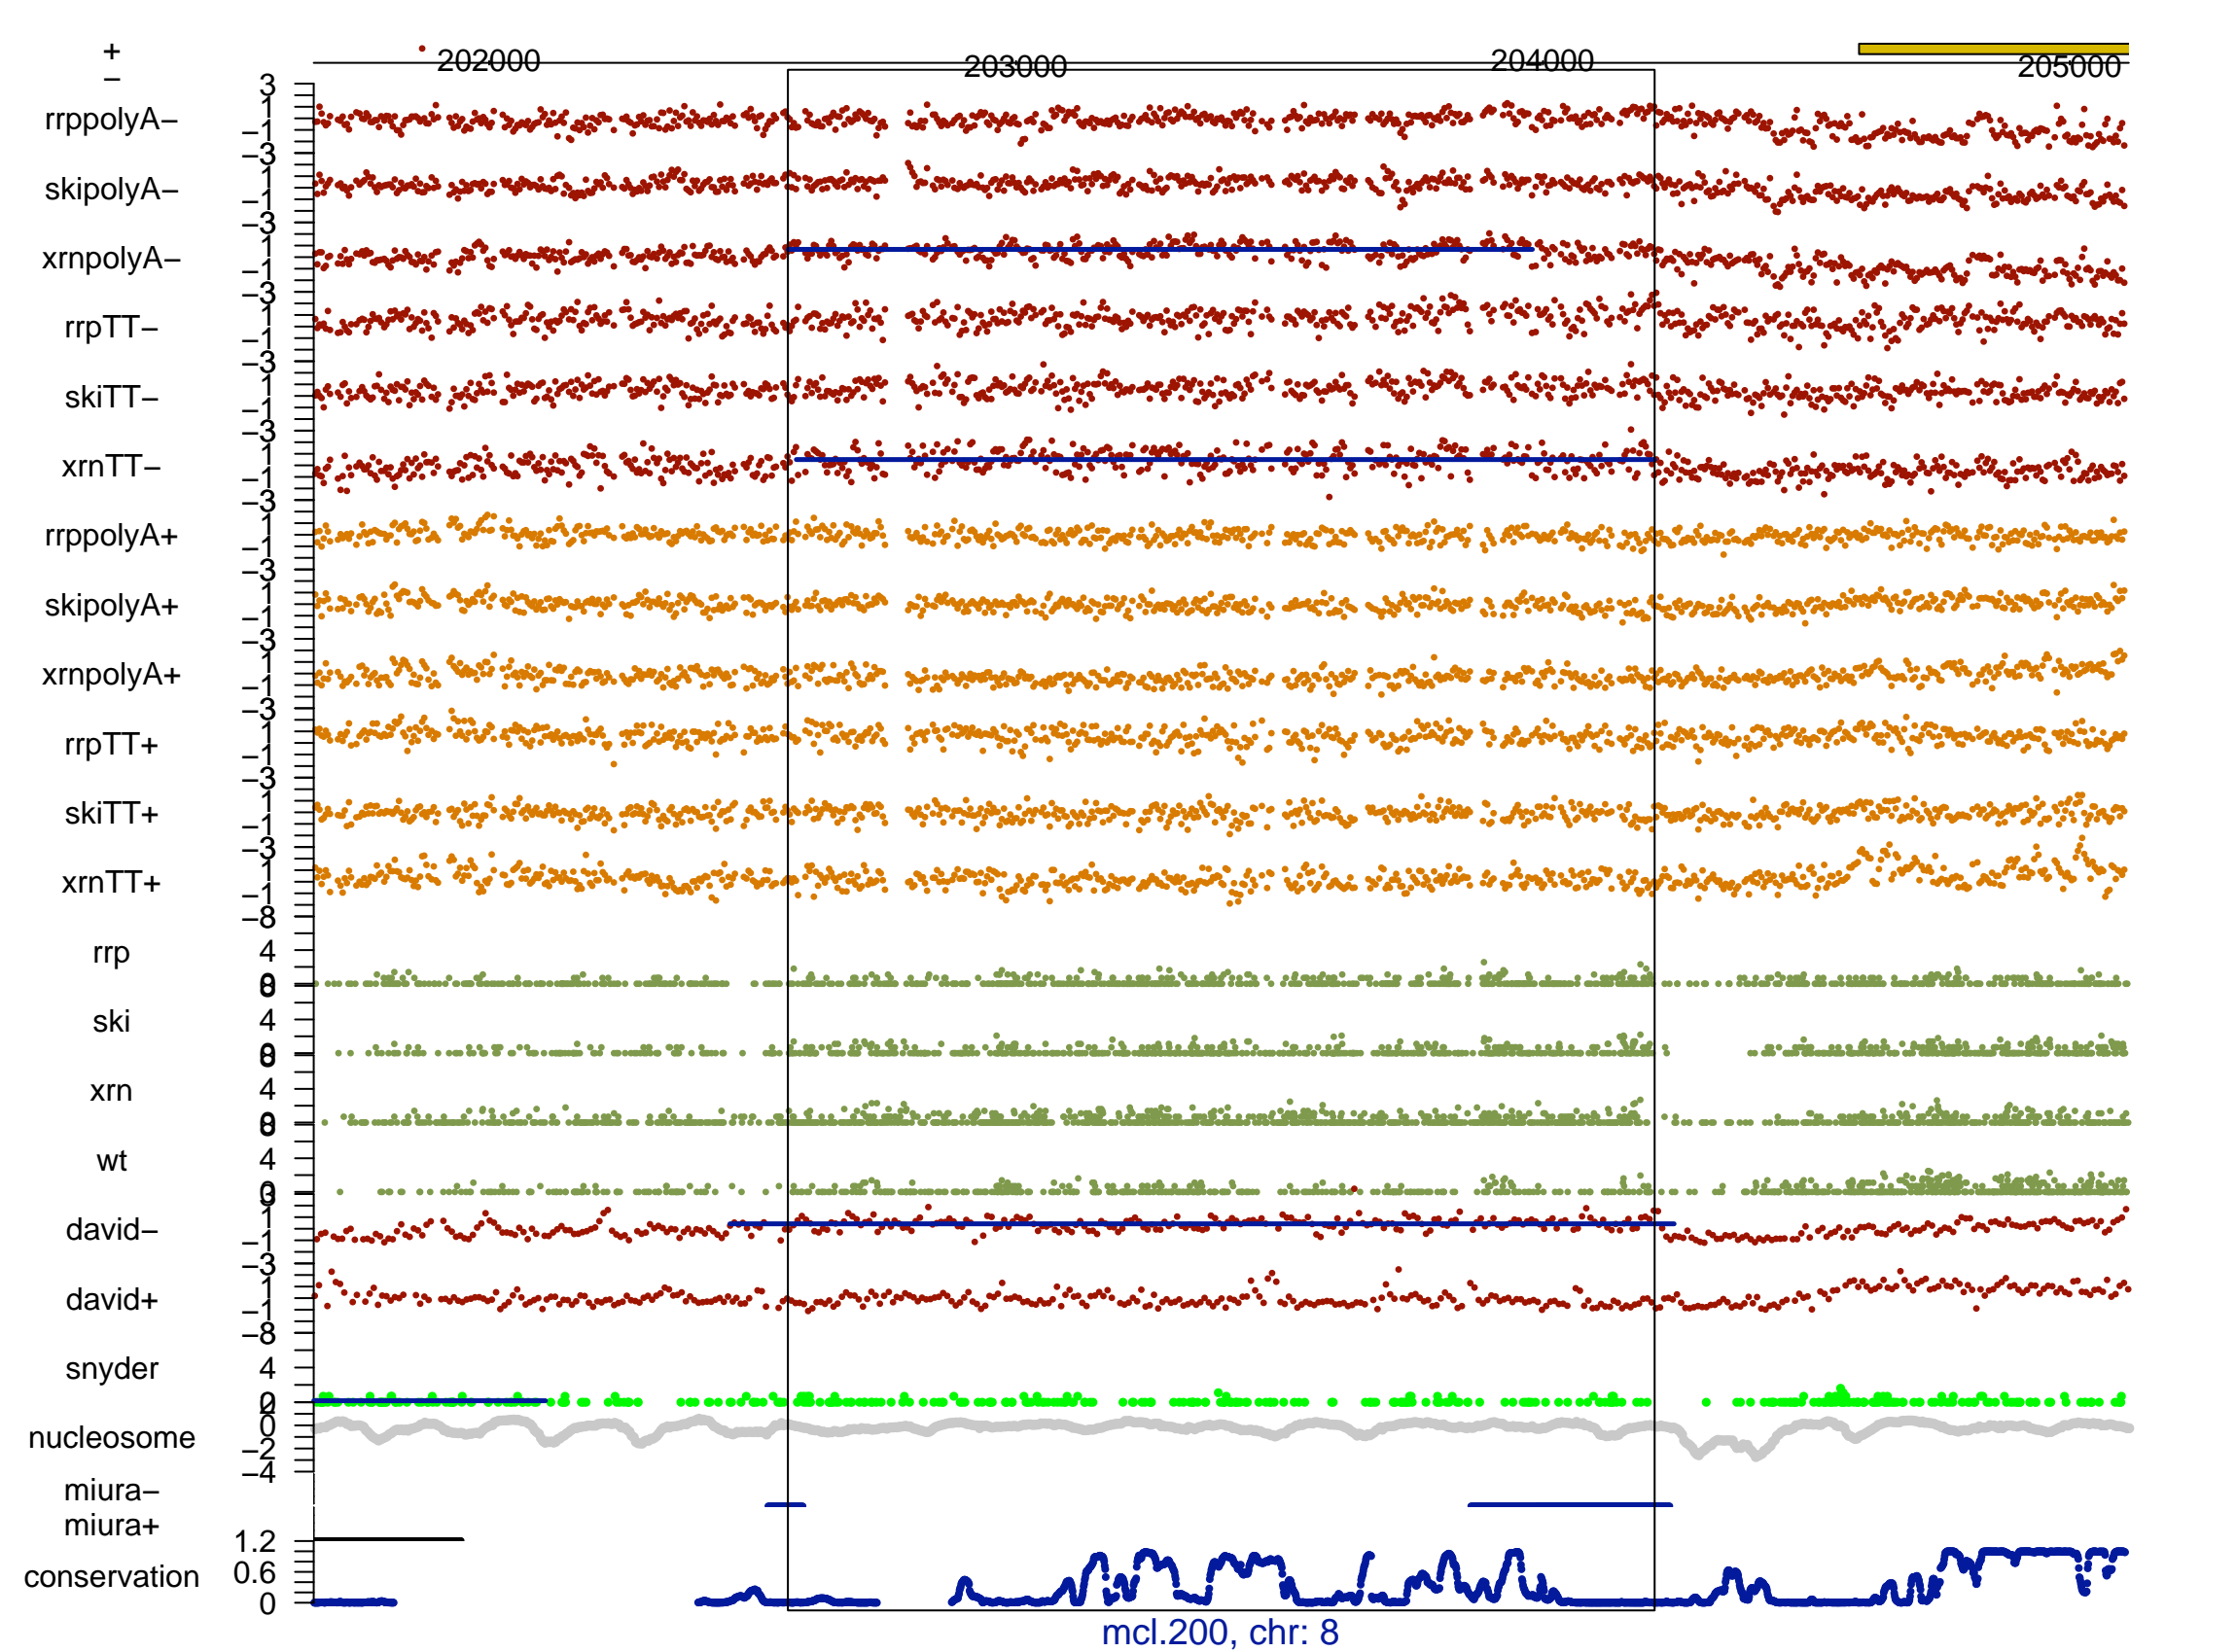

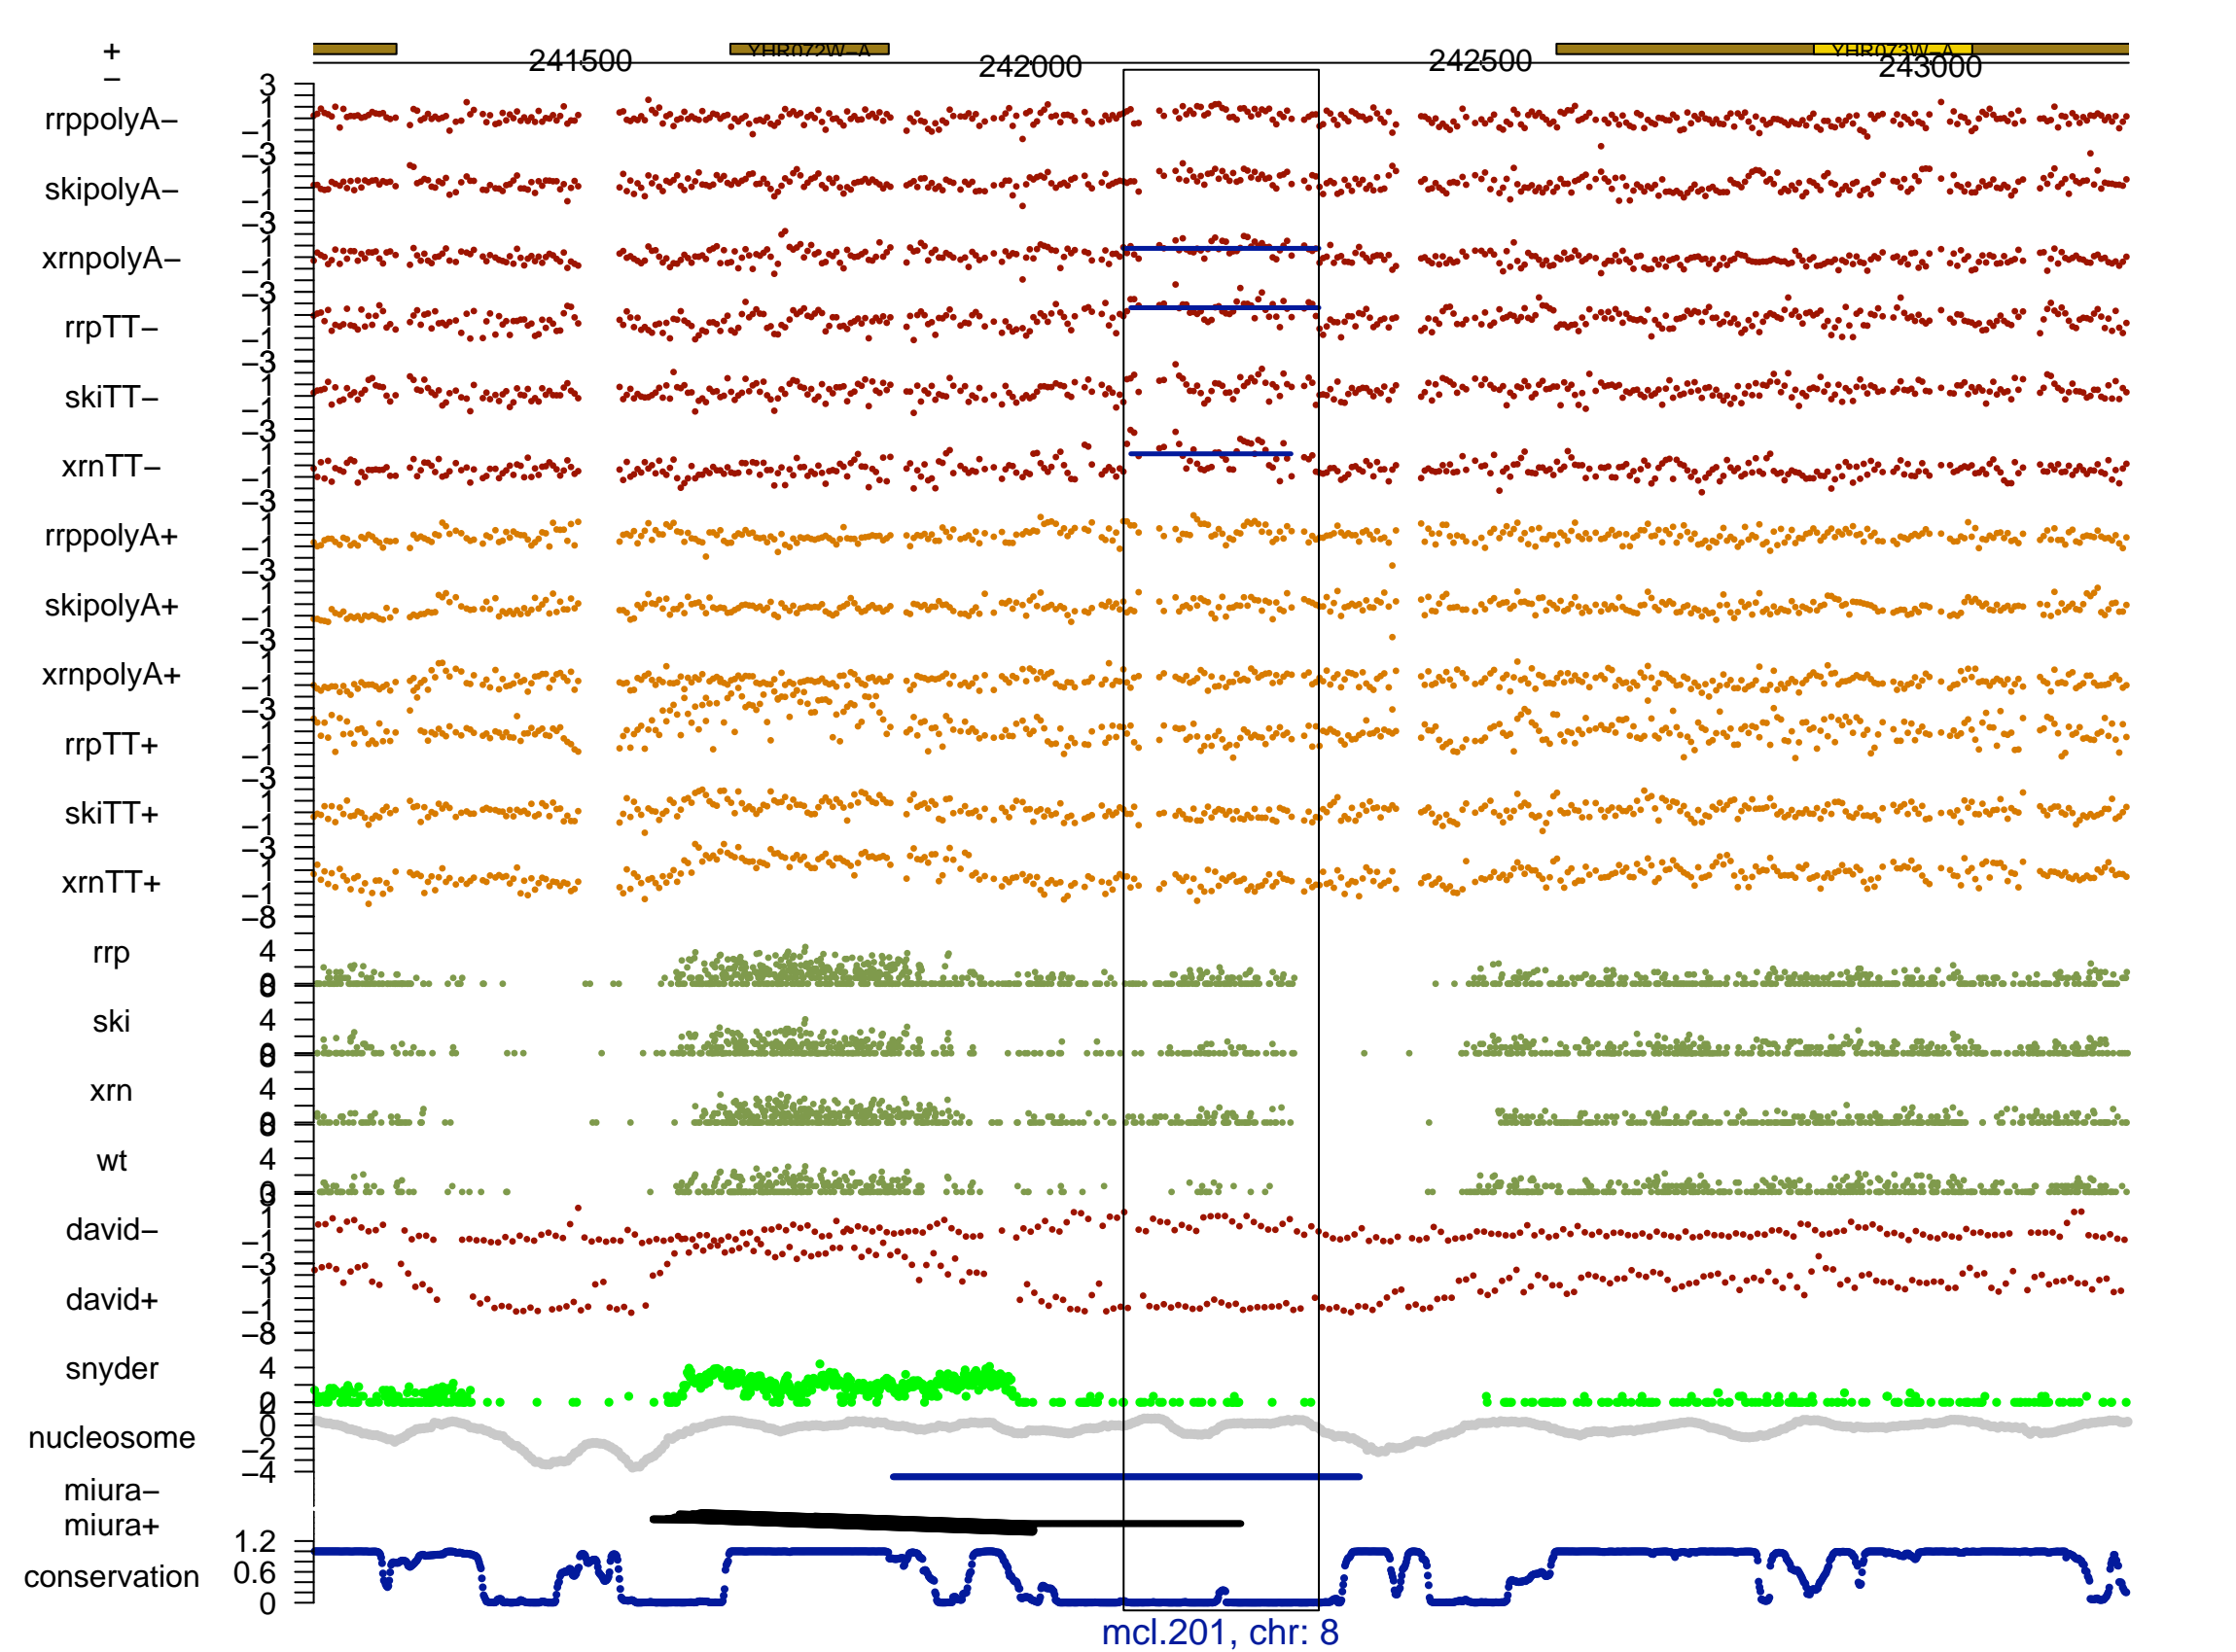



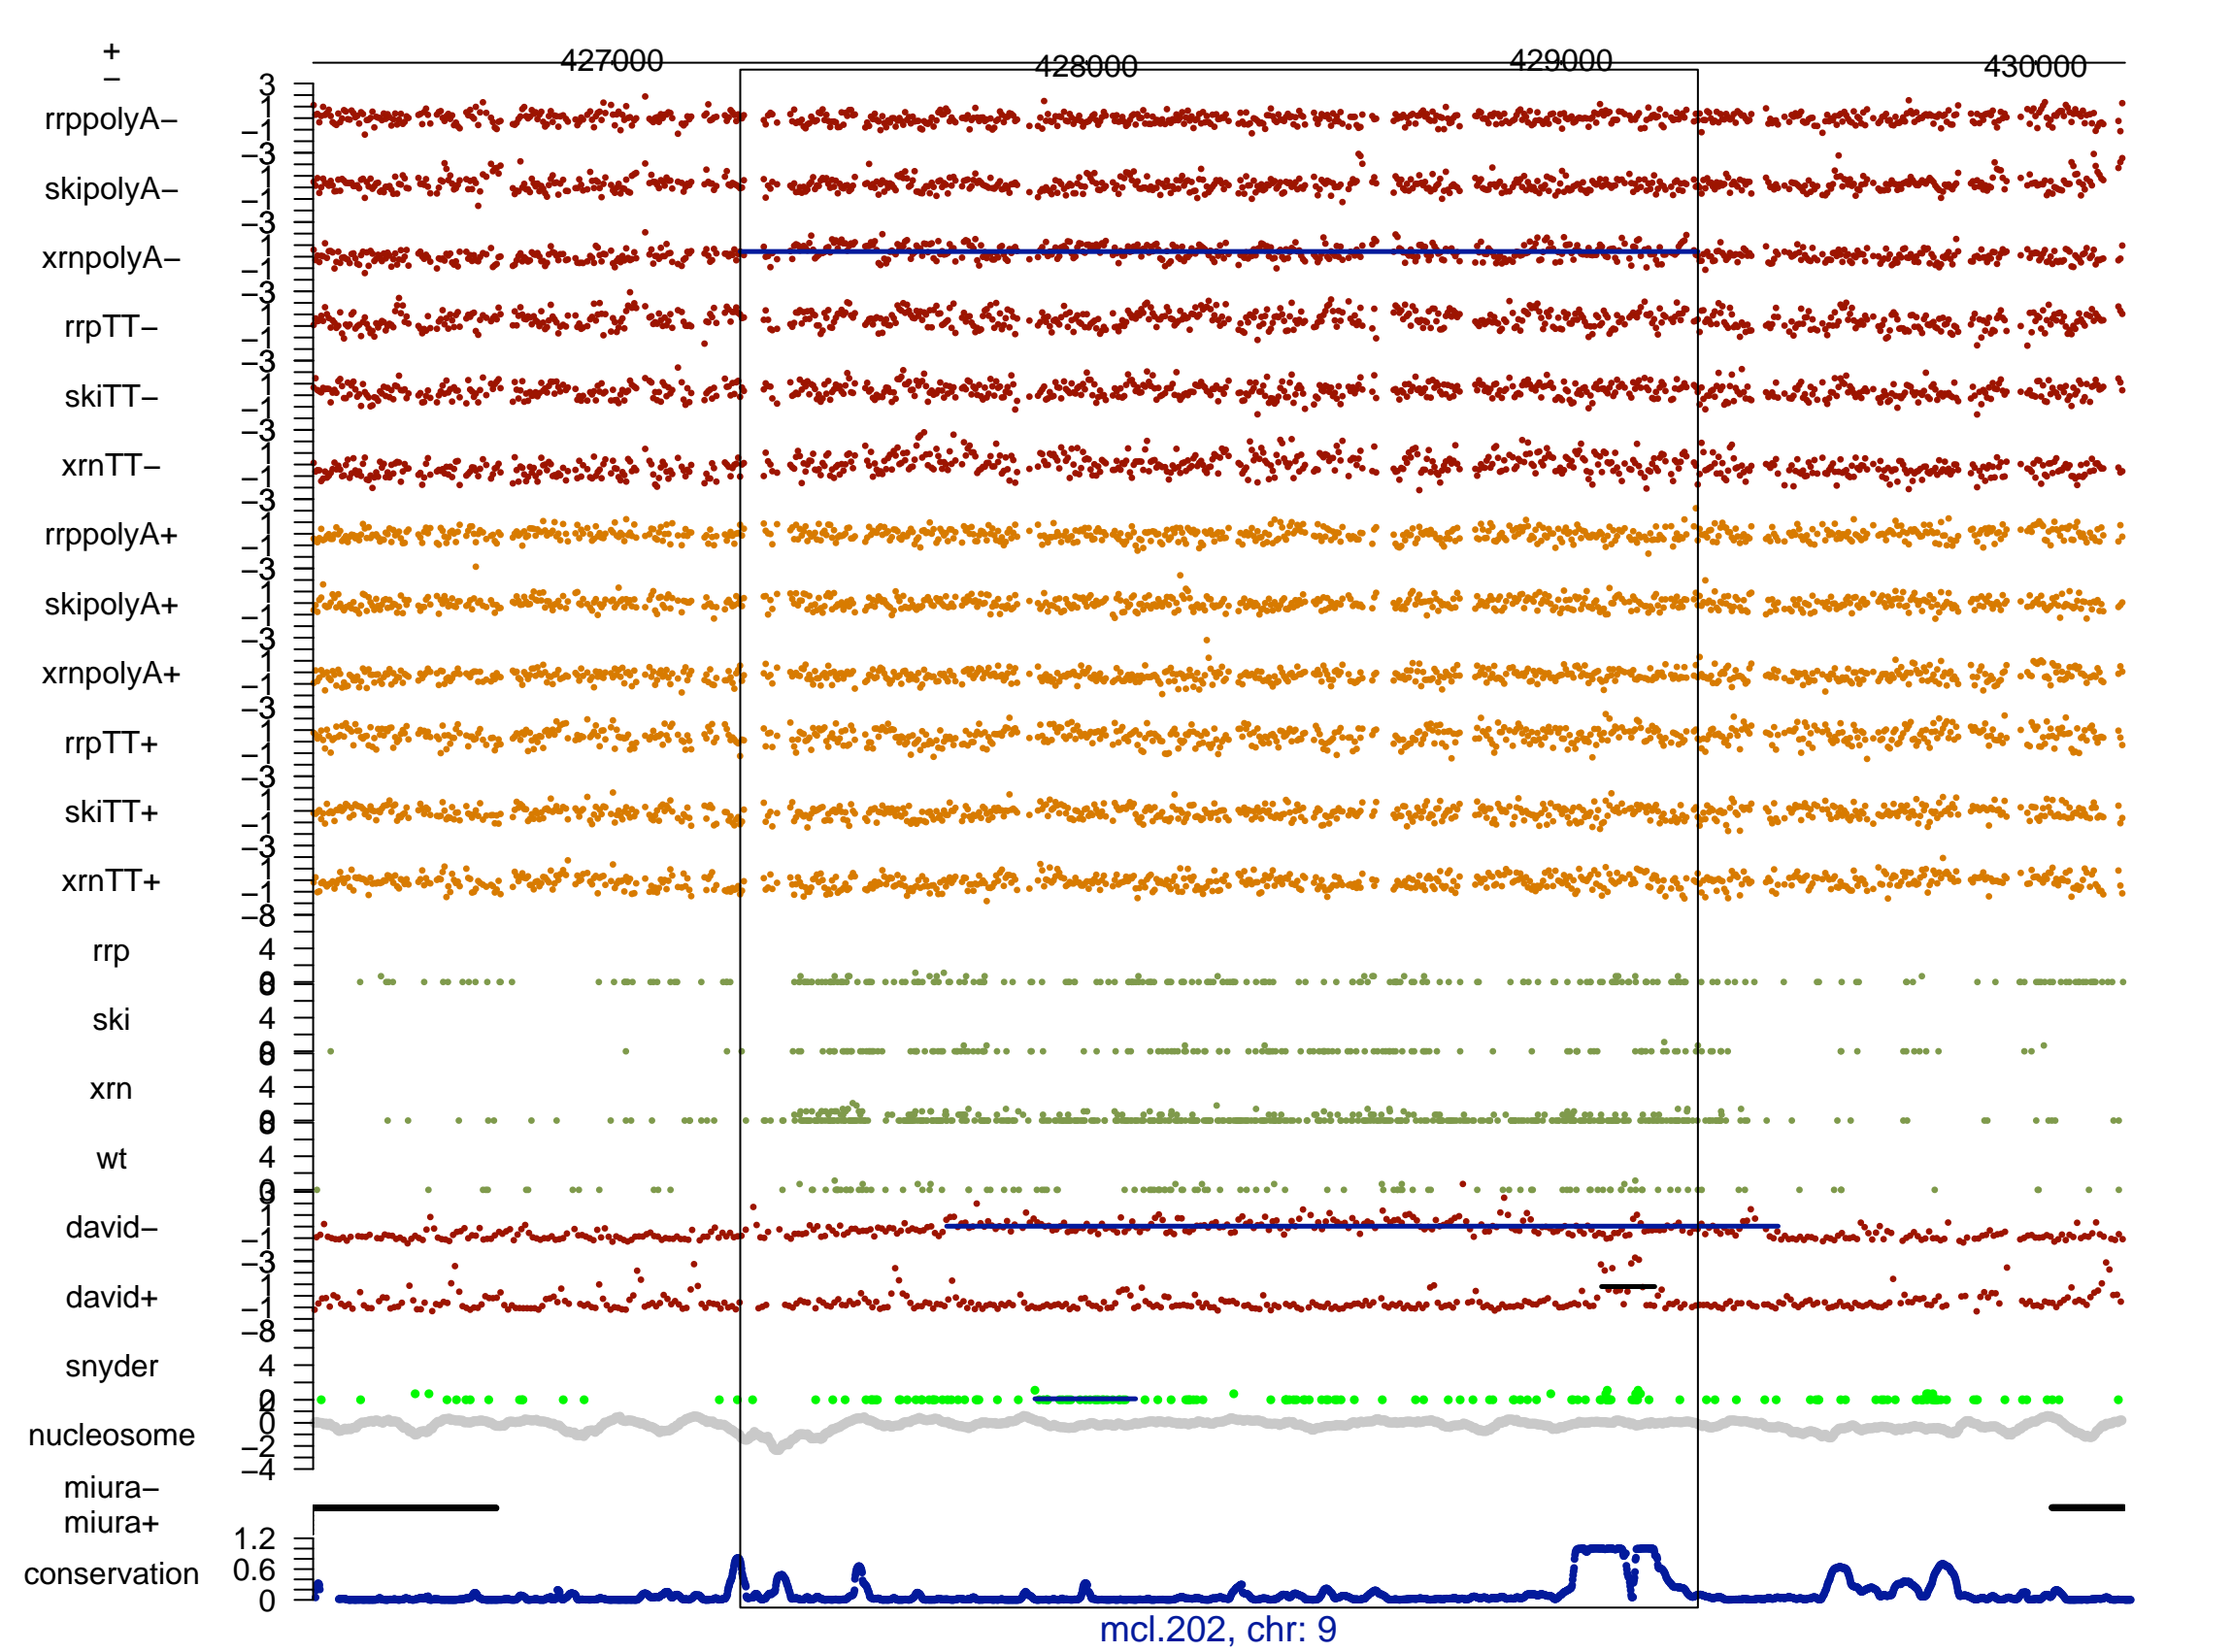

mcl.202, chr: 9

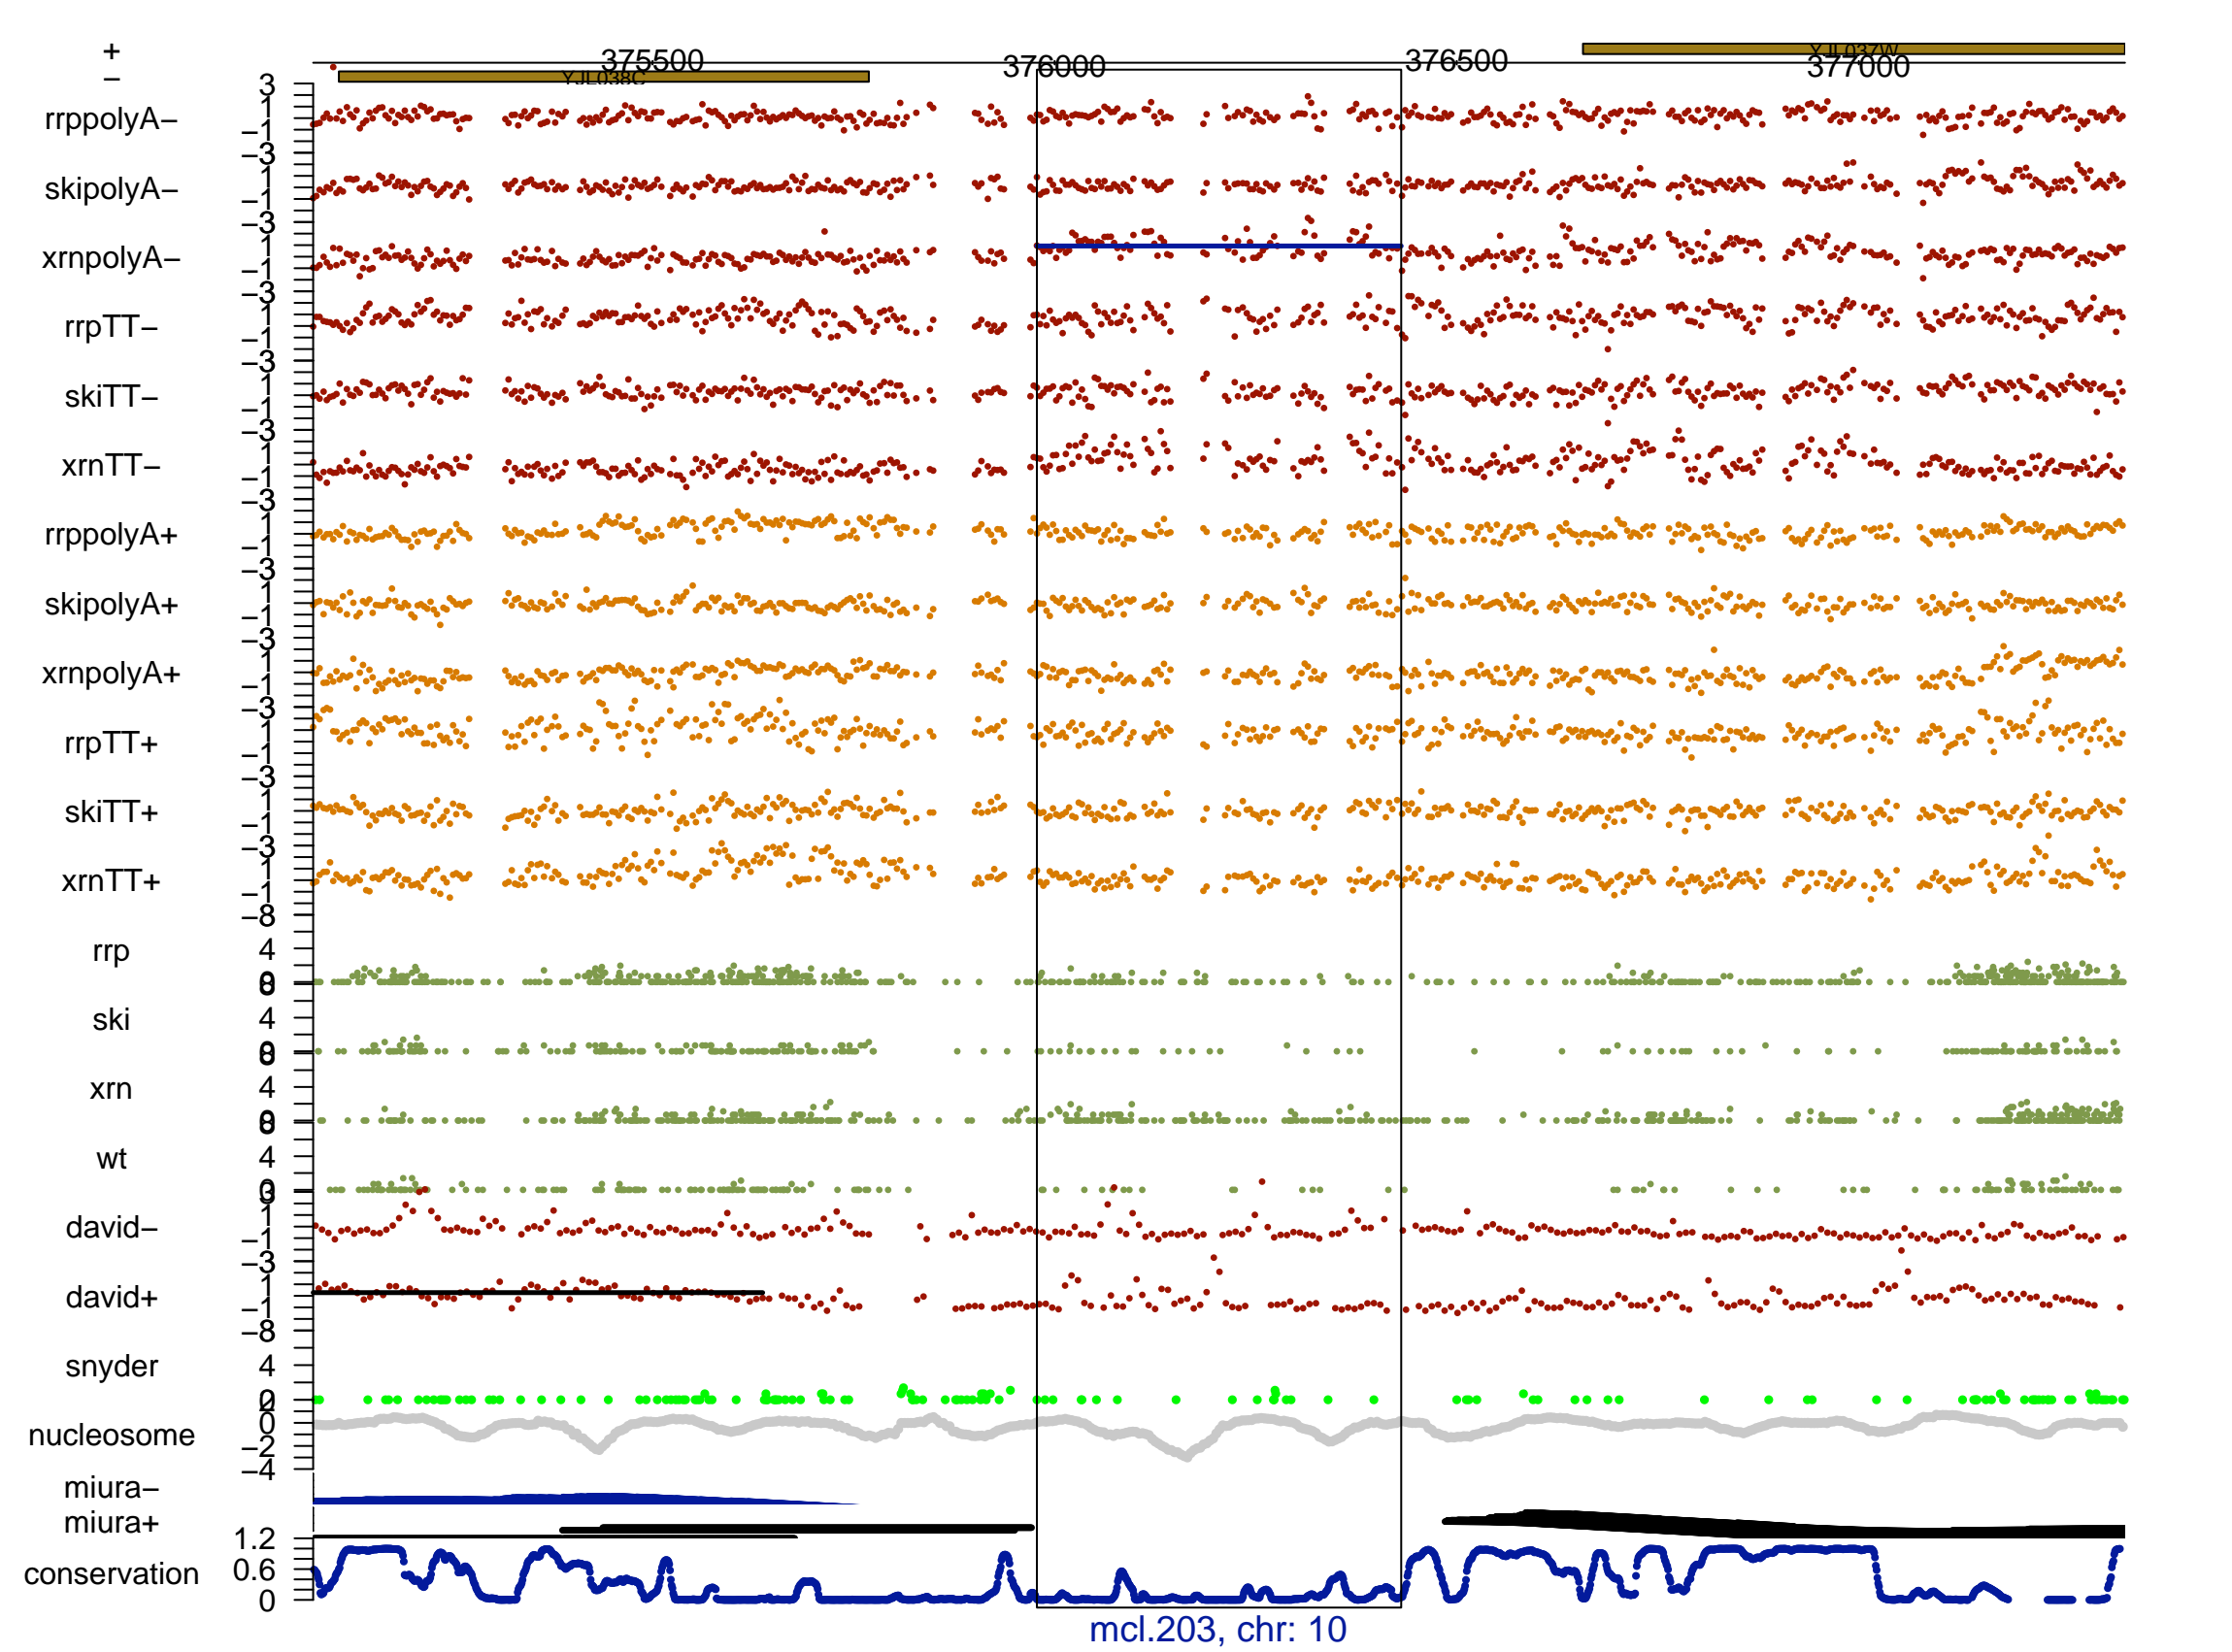



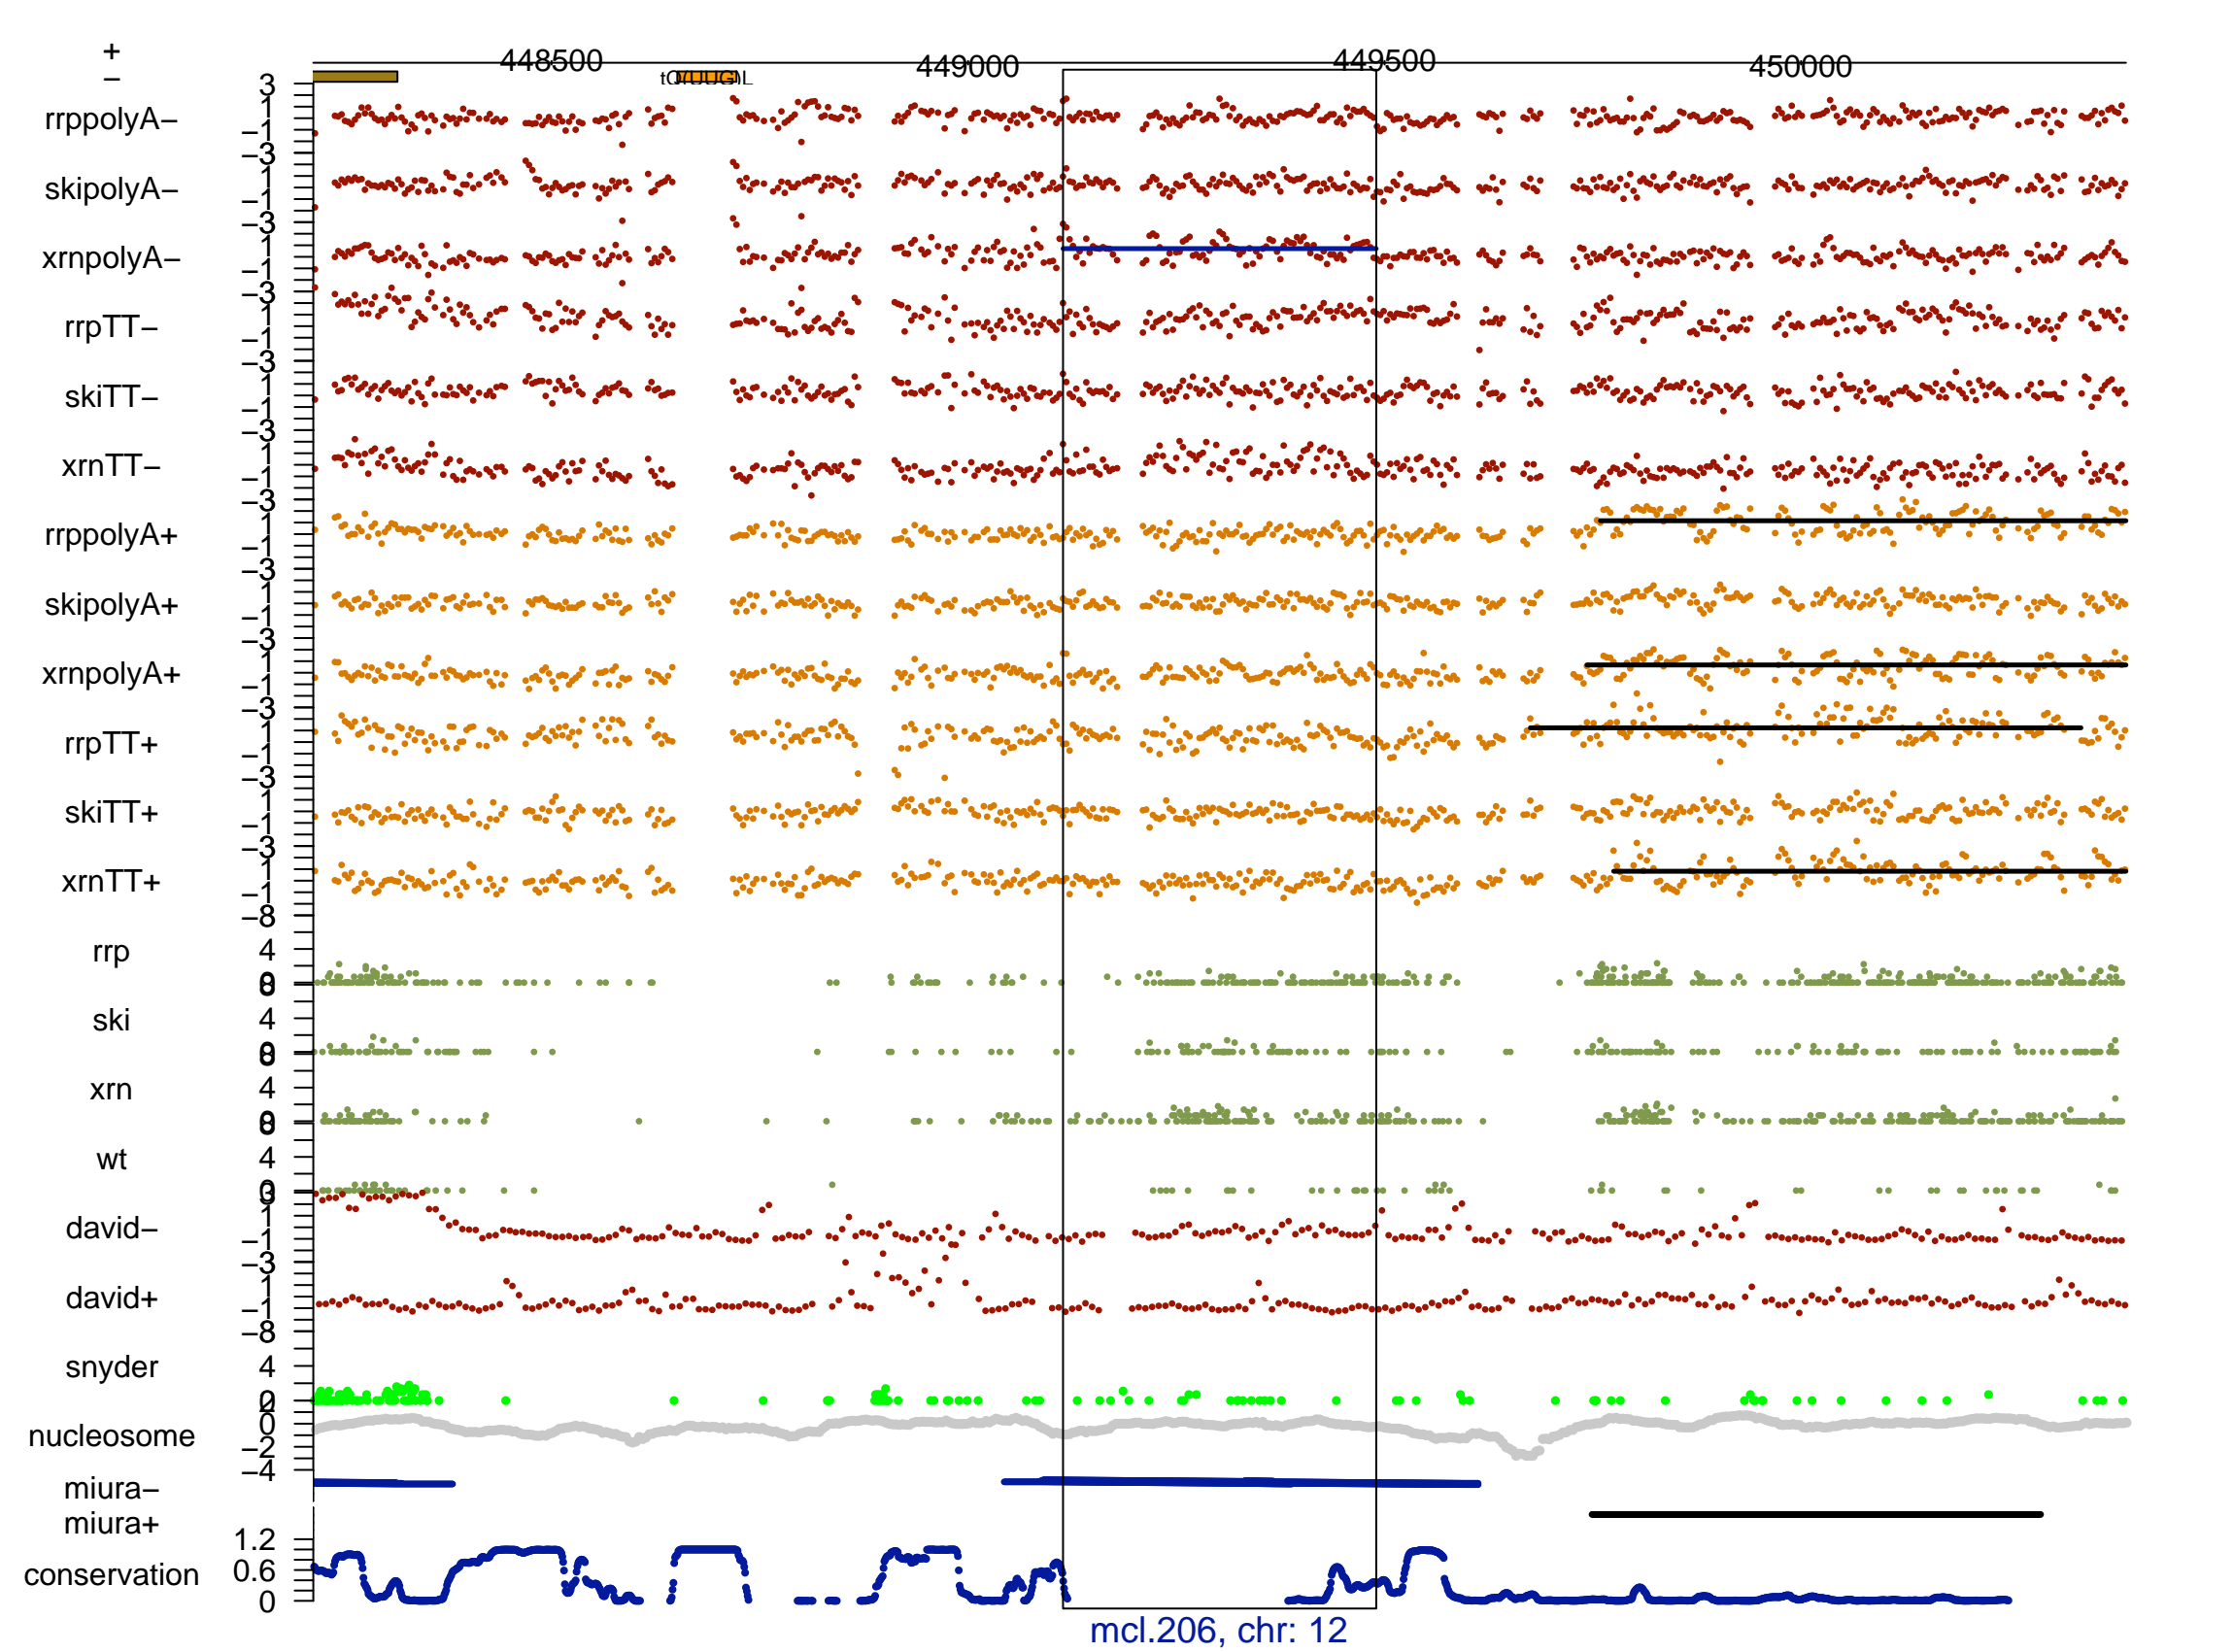



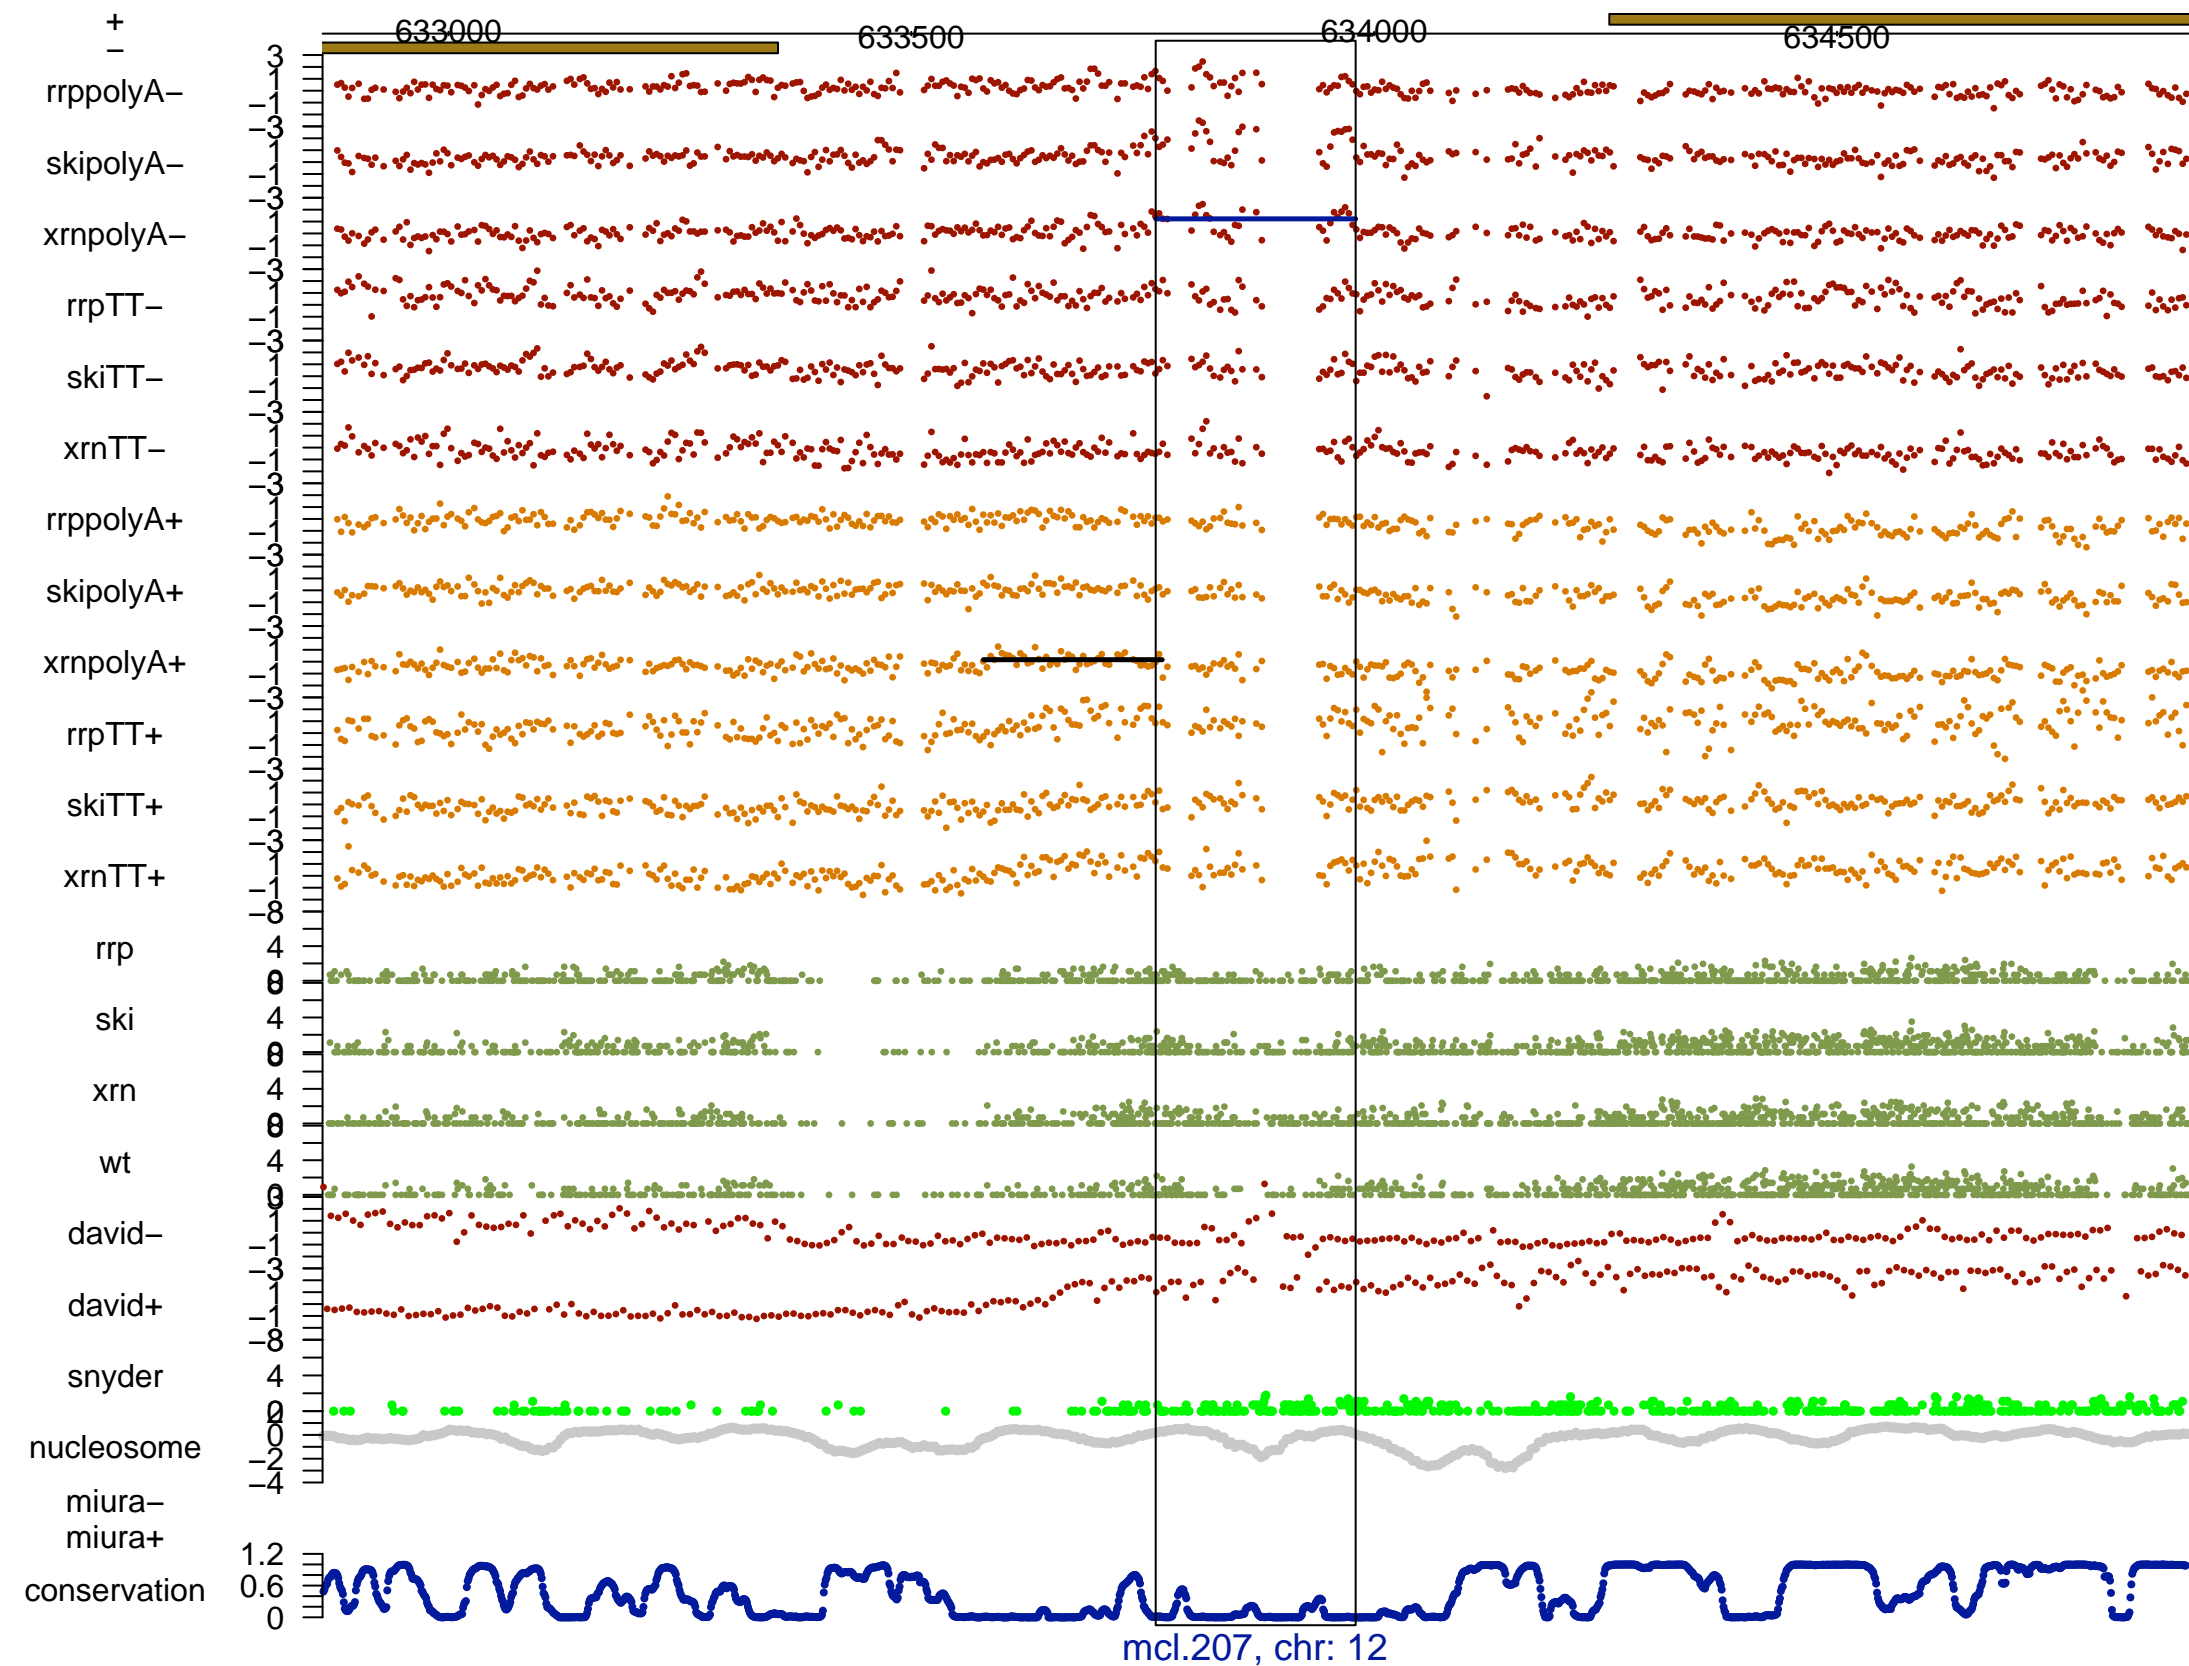

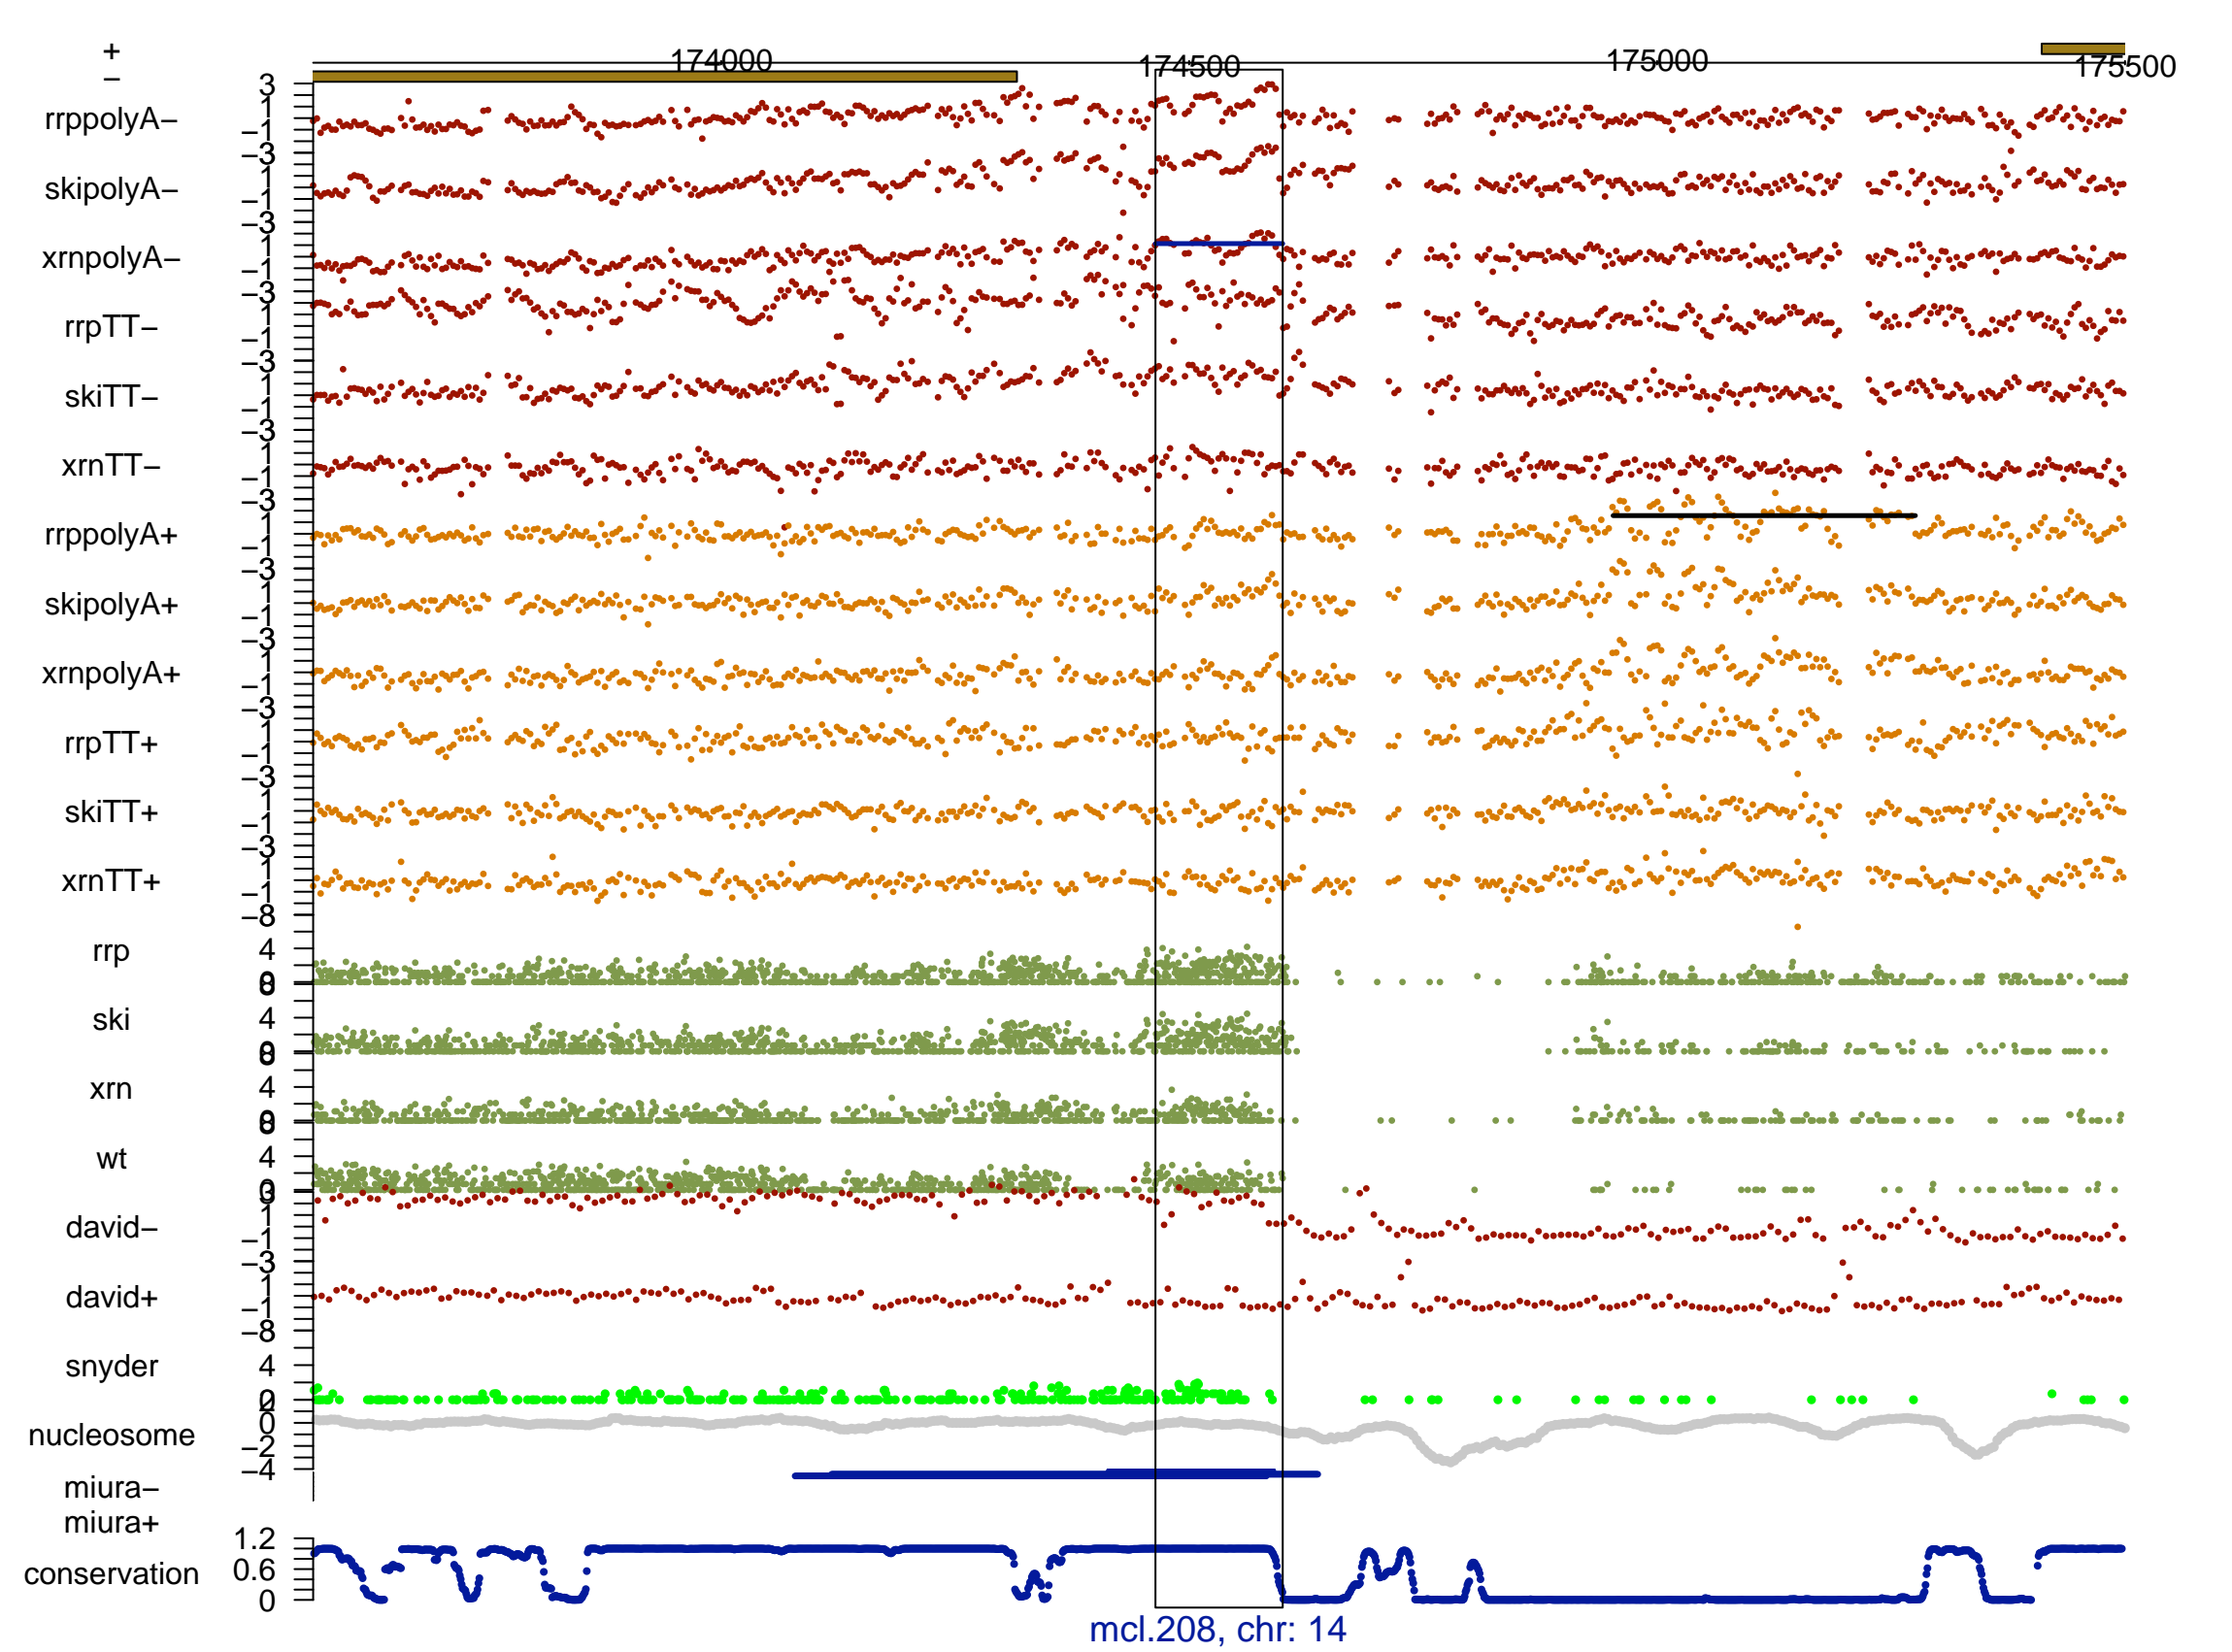

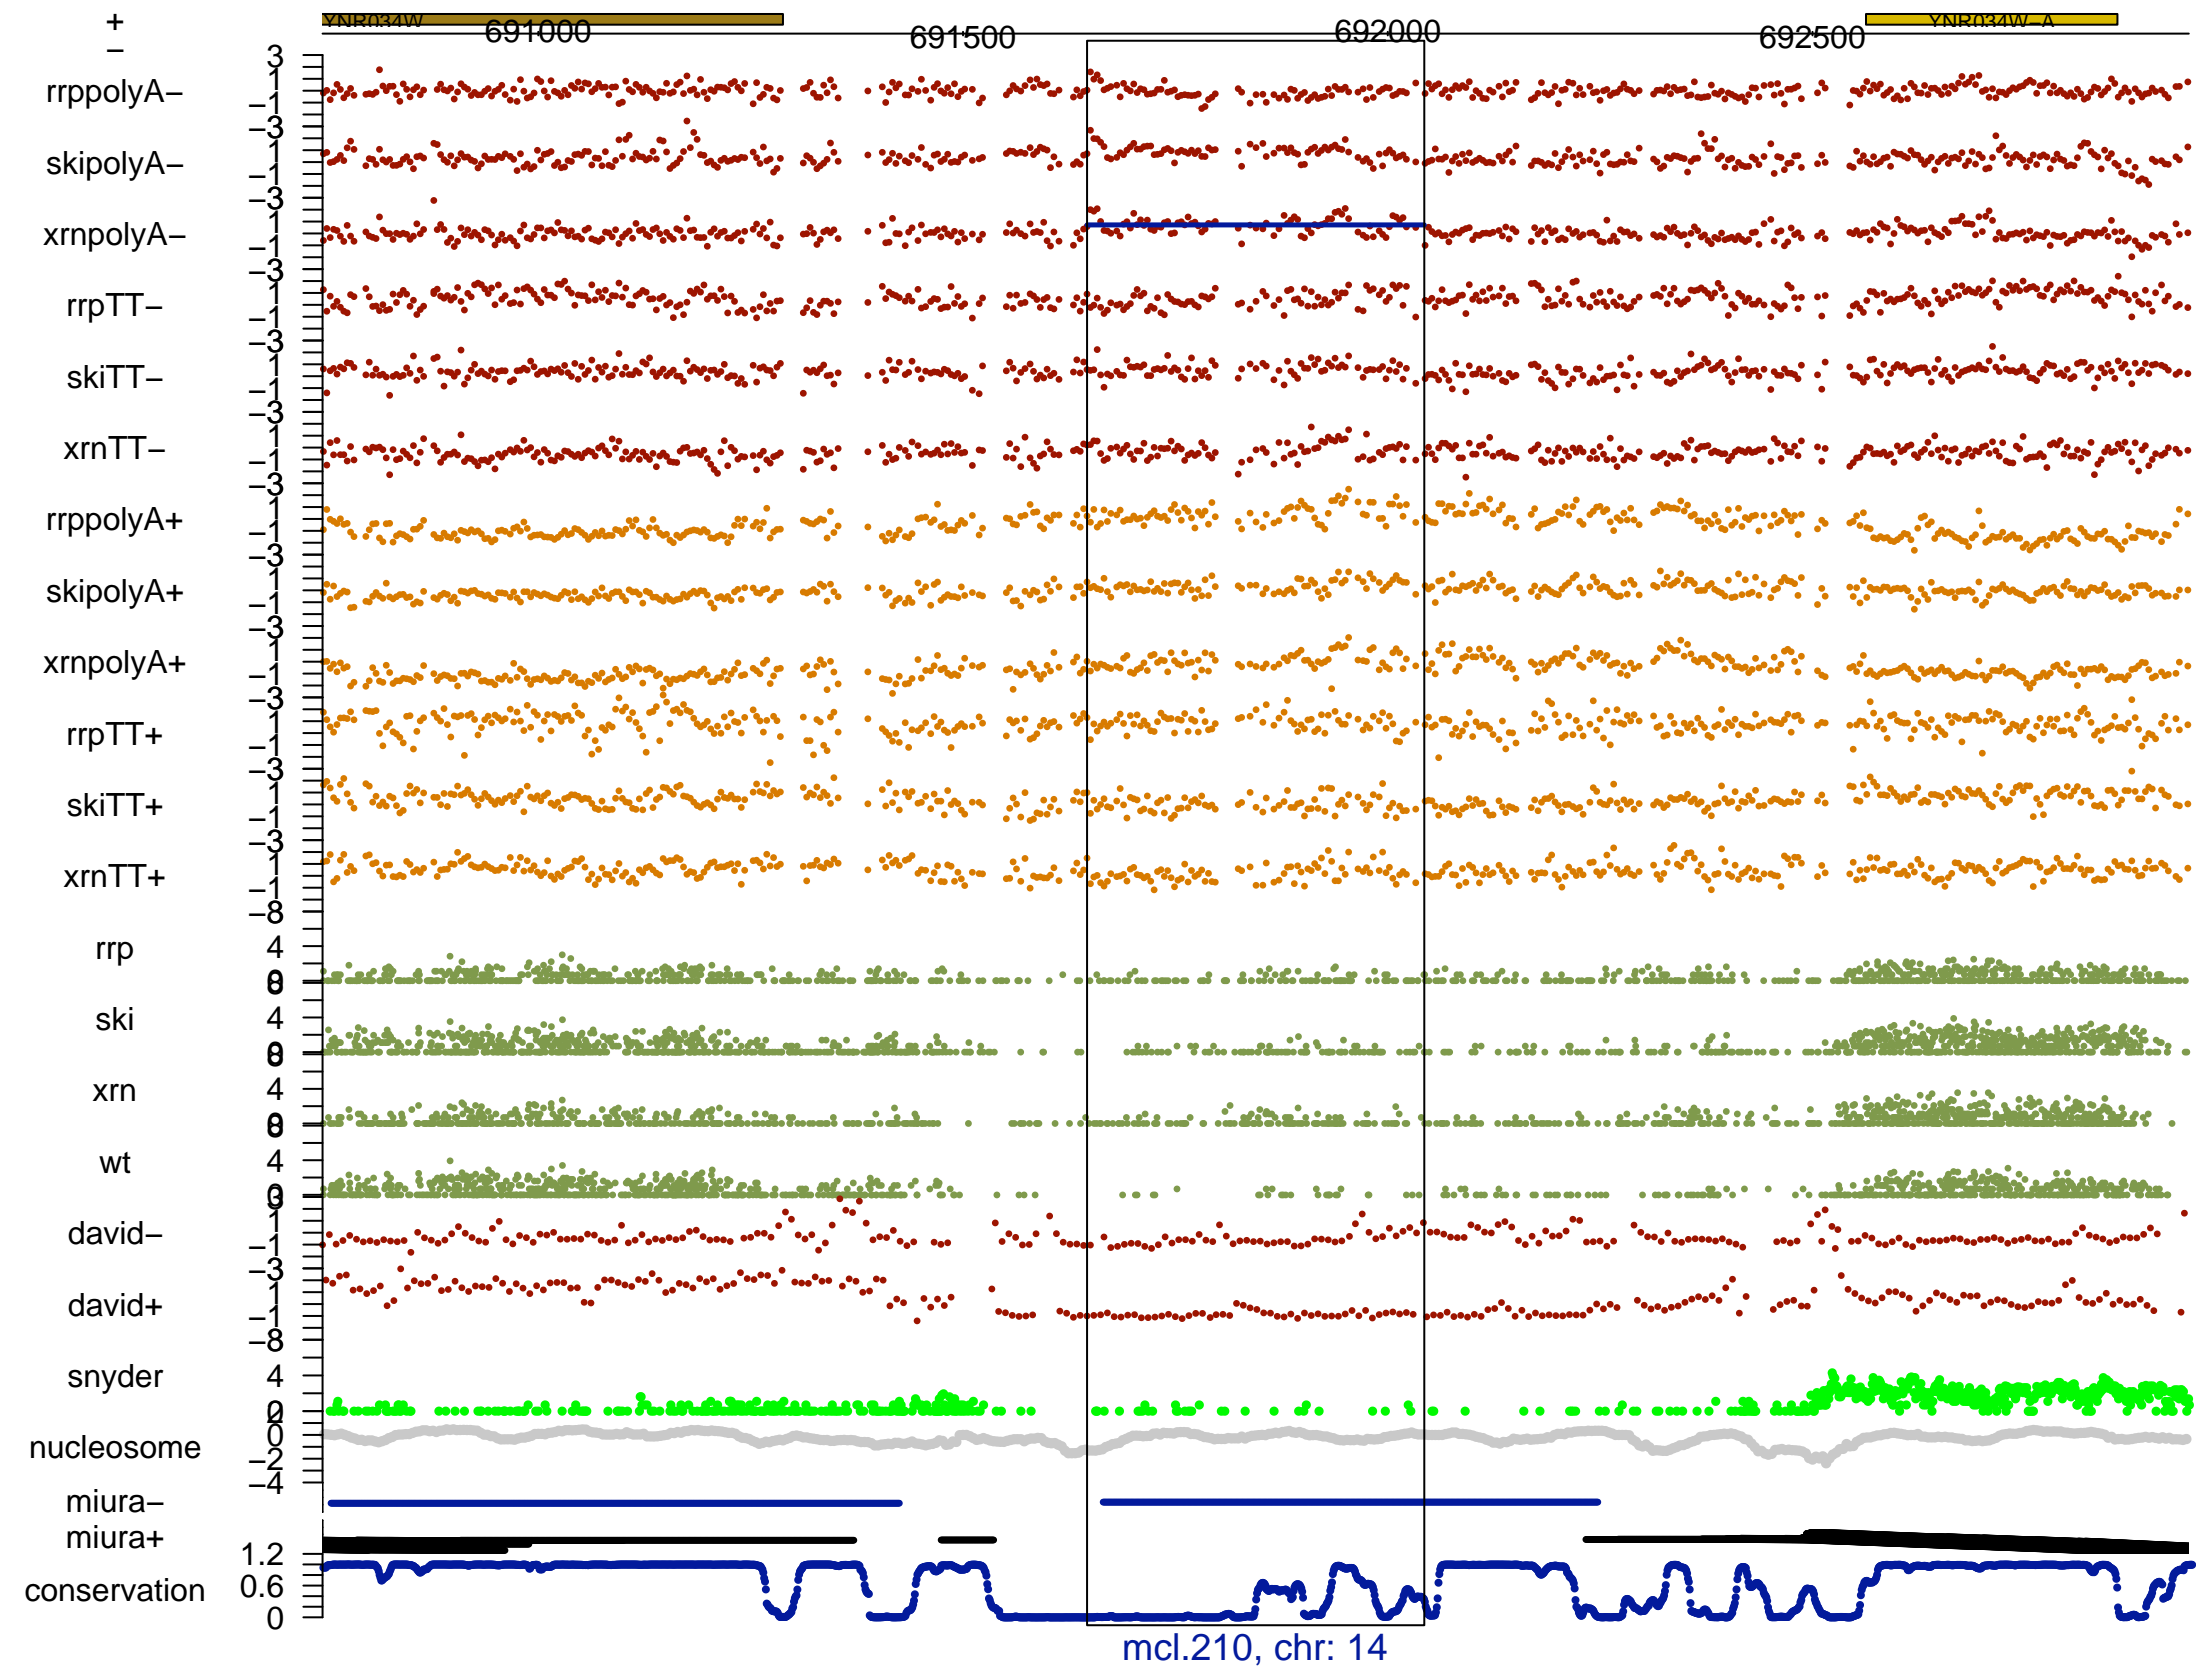

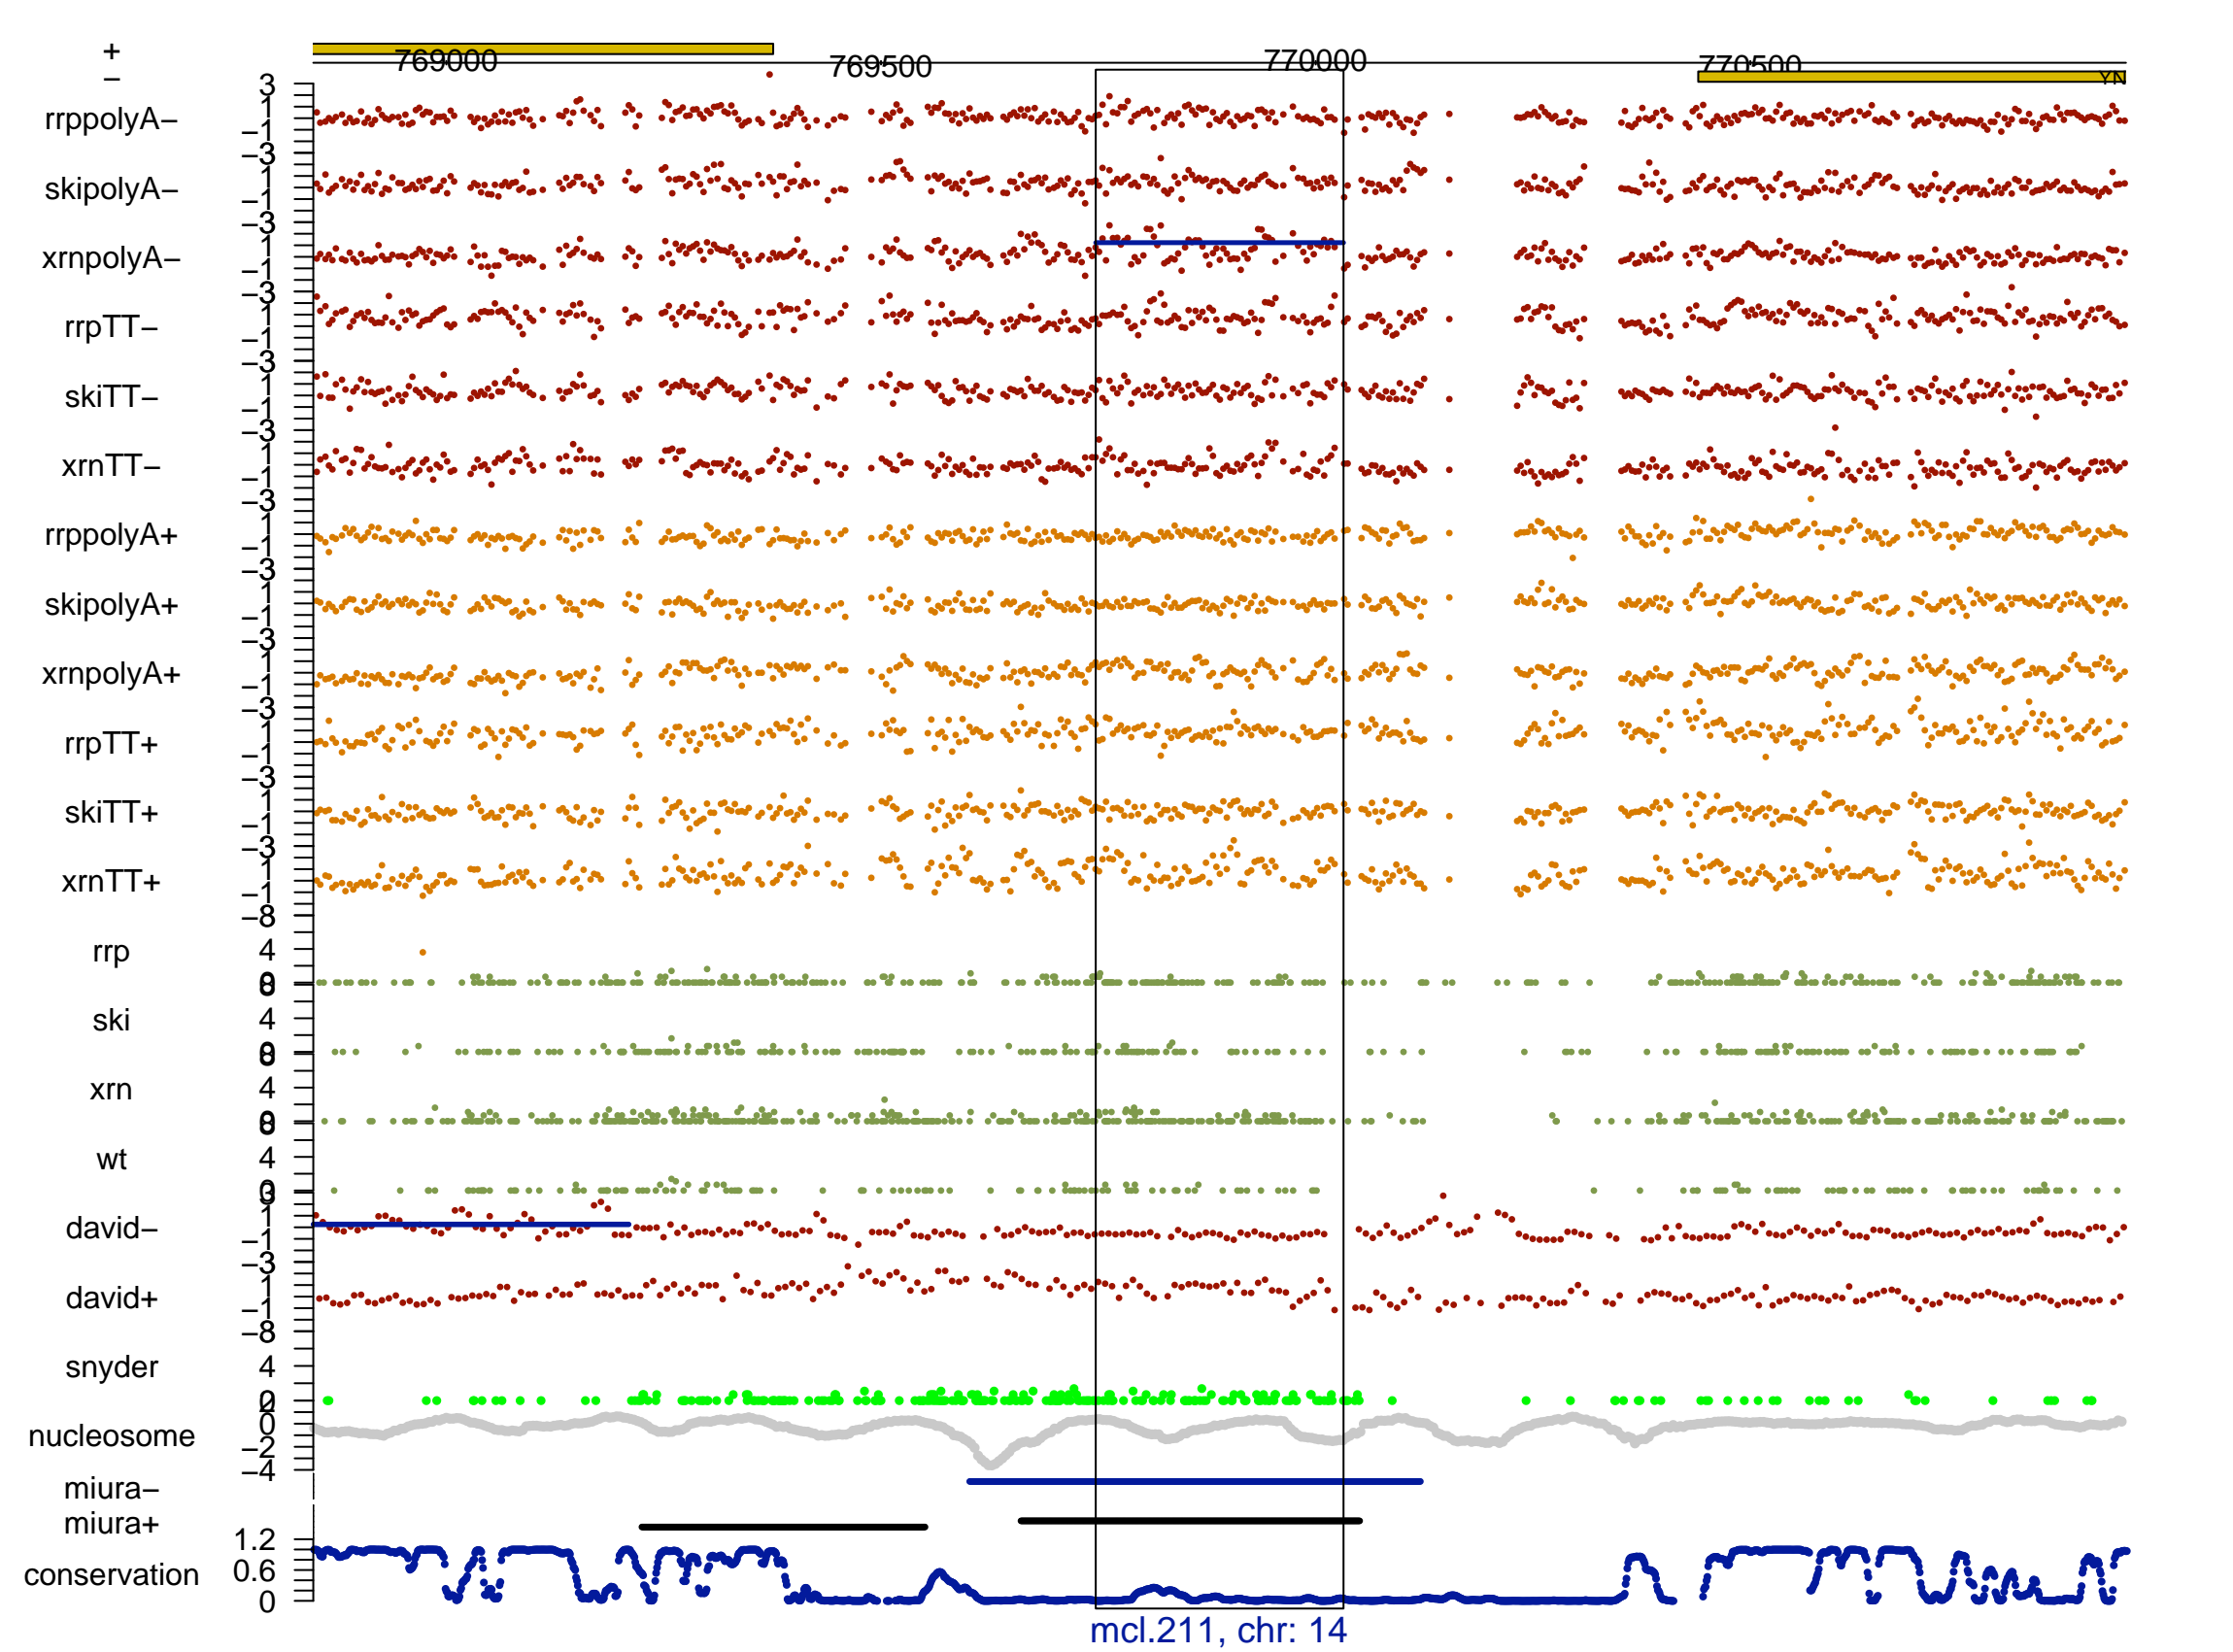



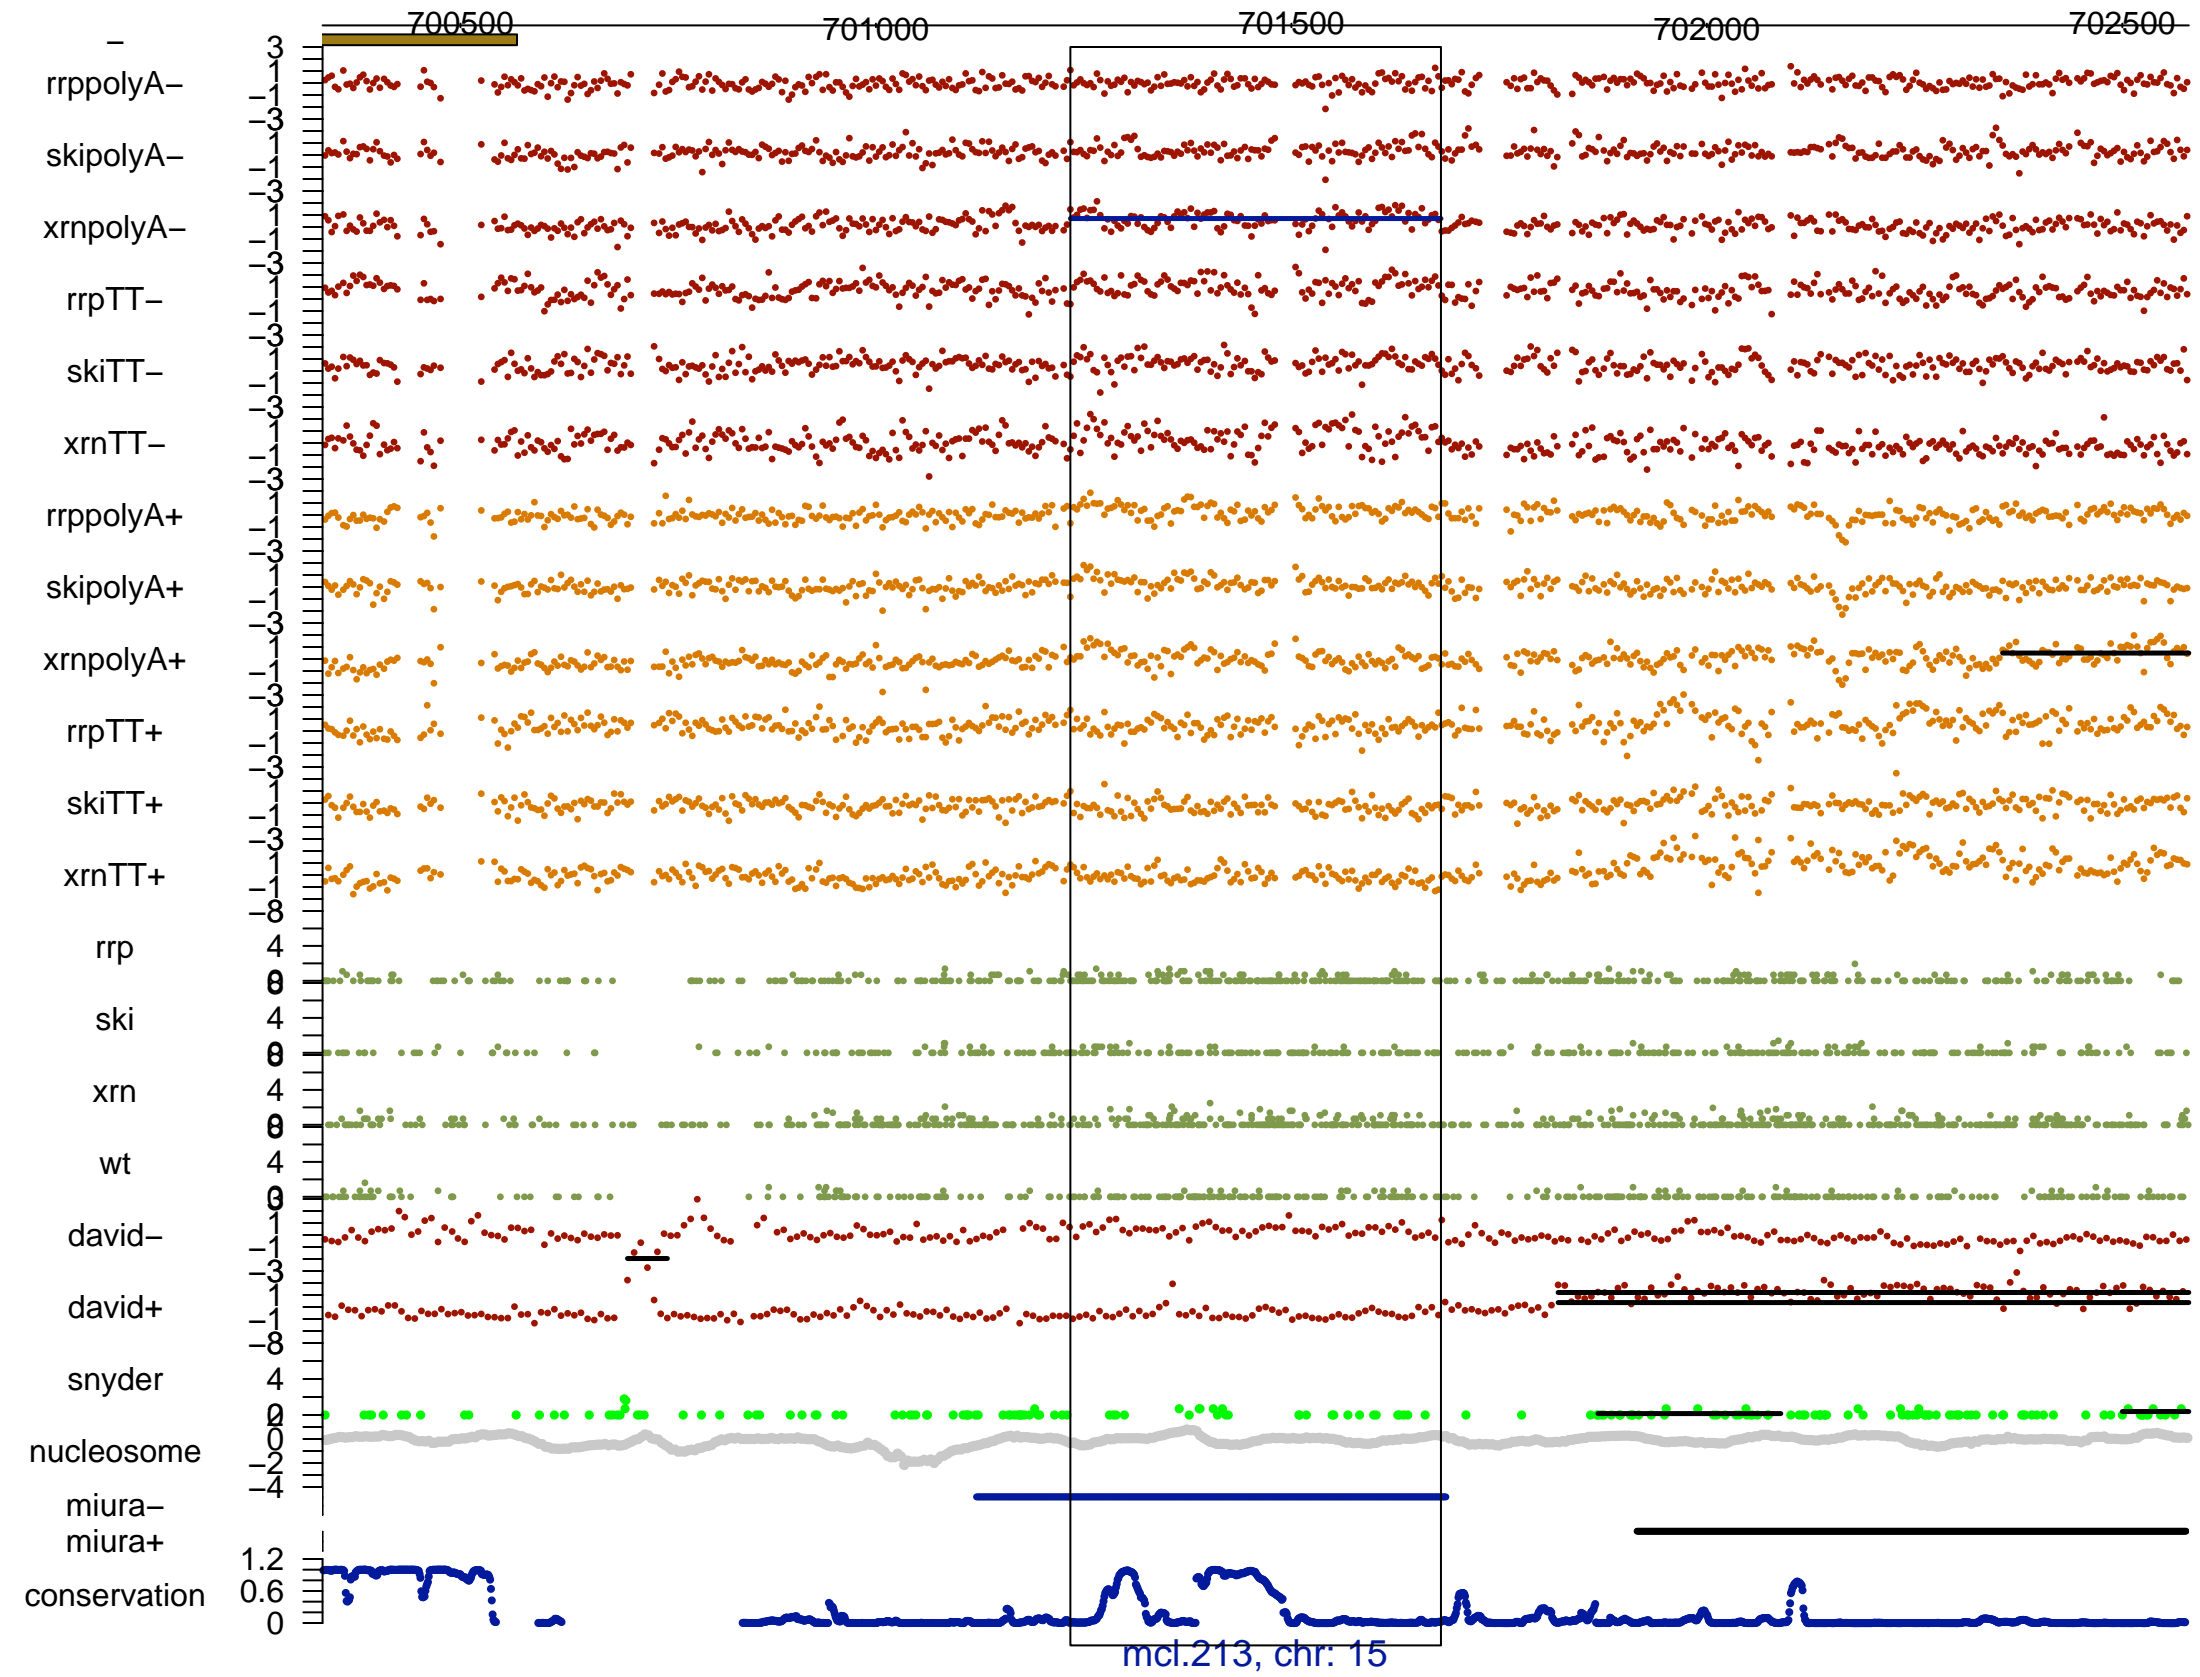

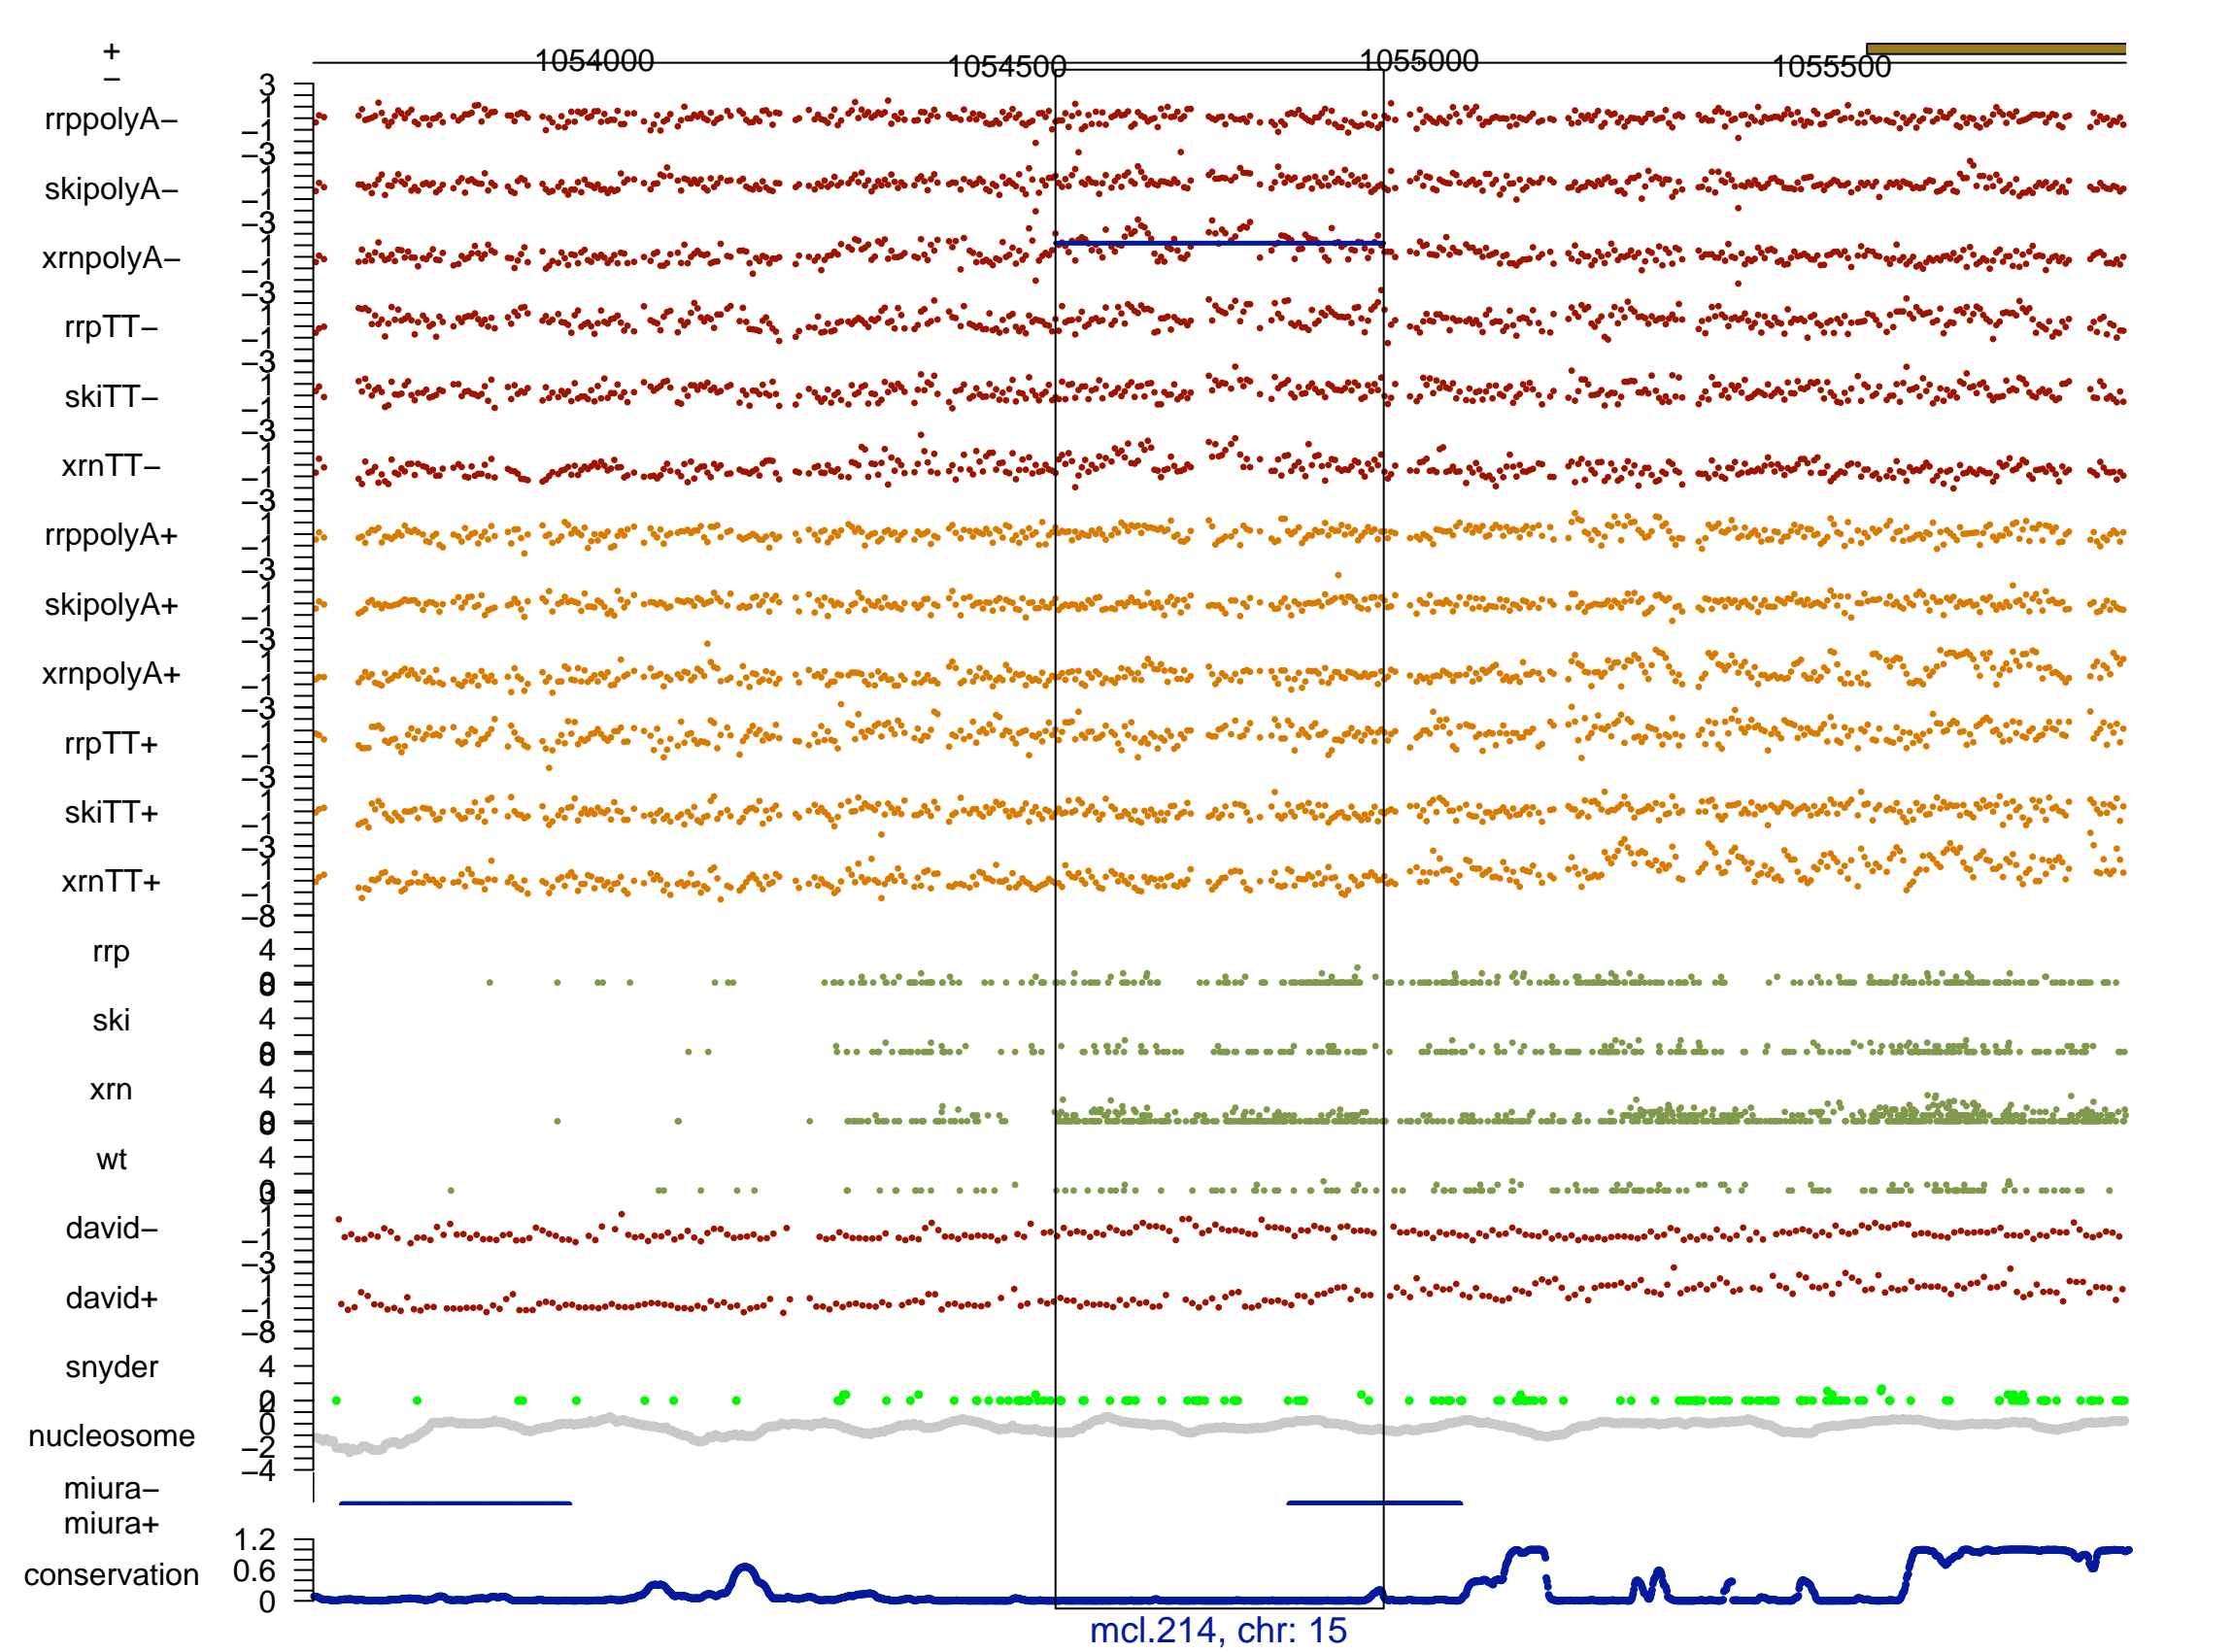

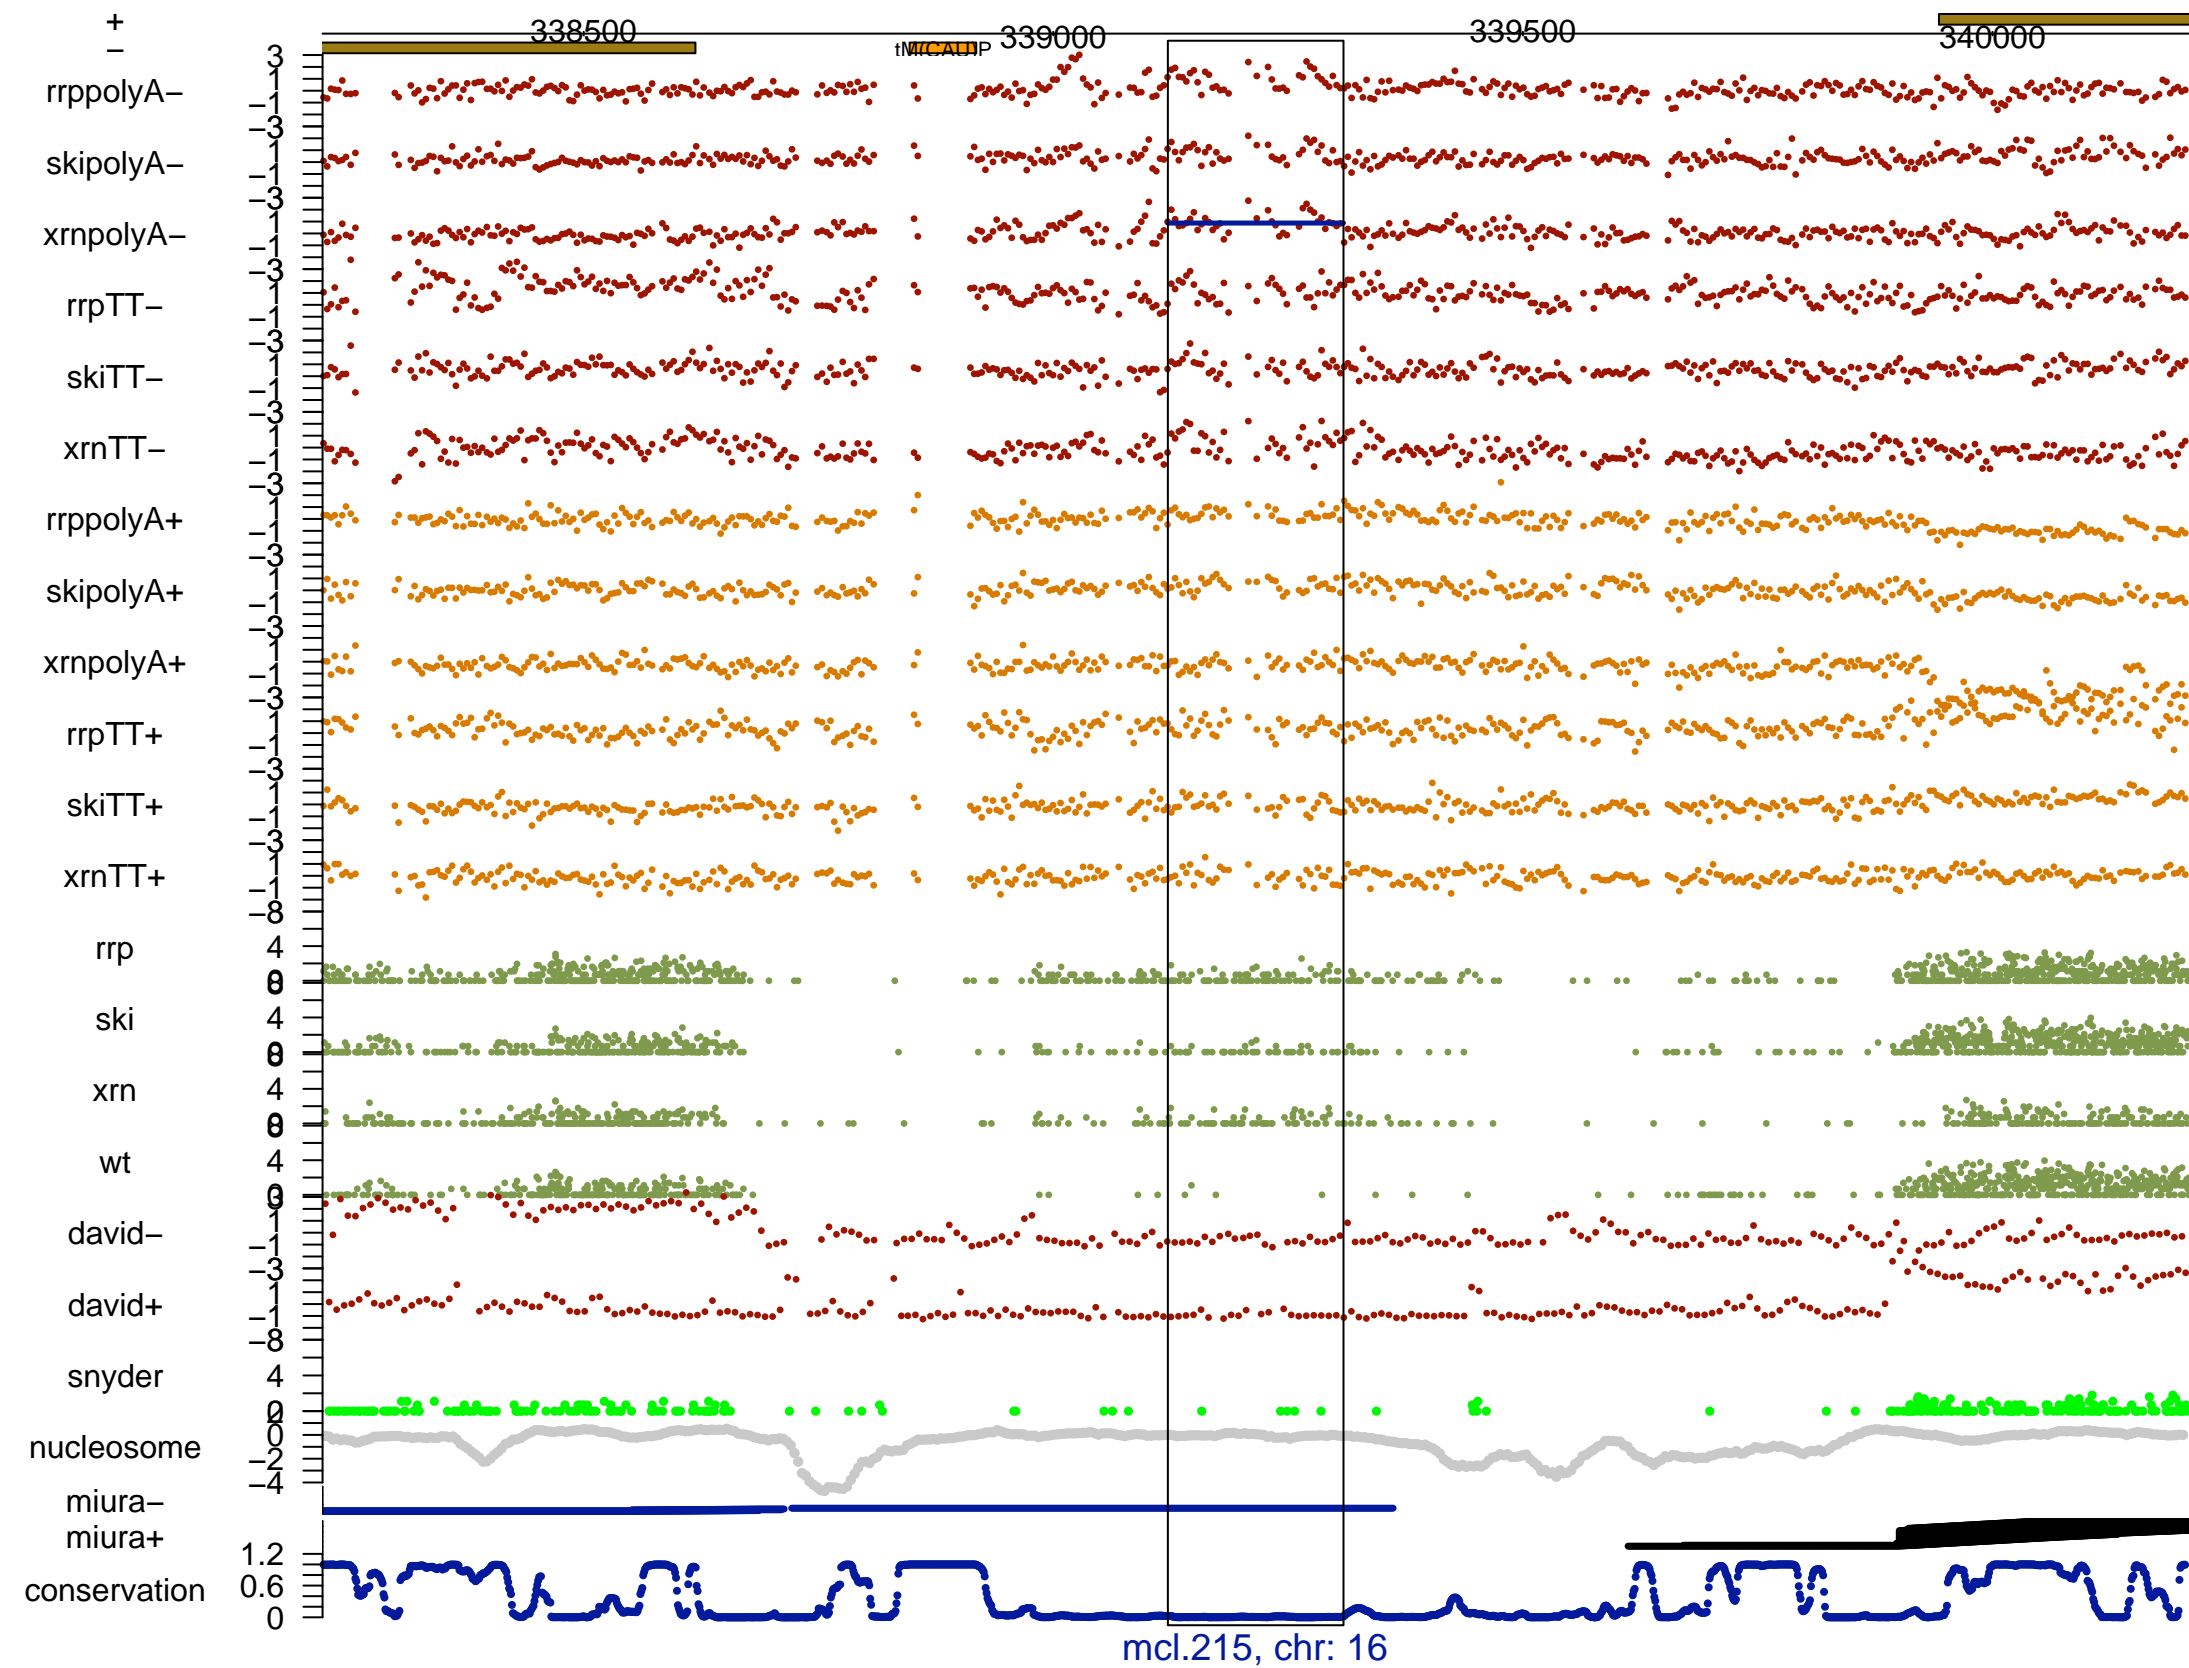

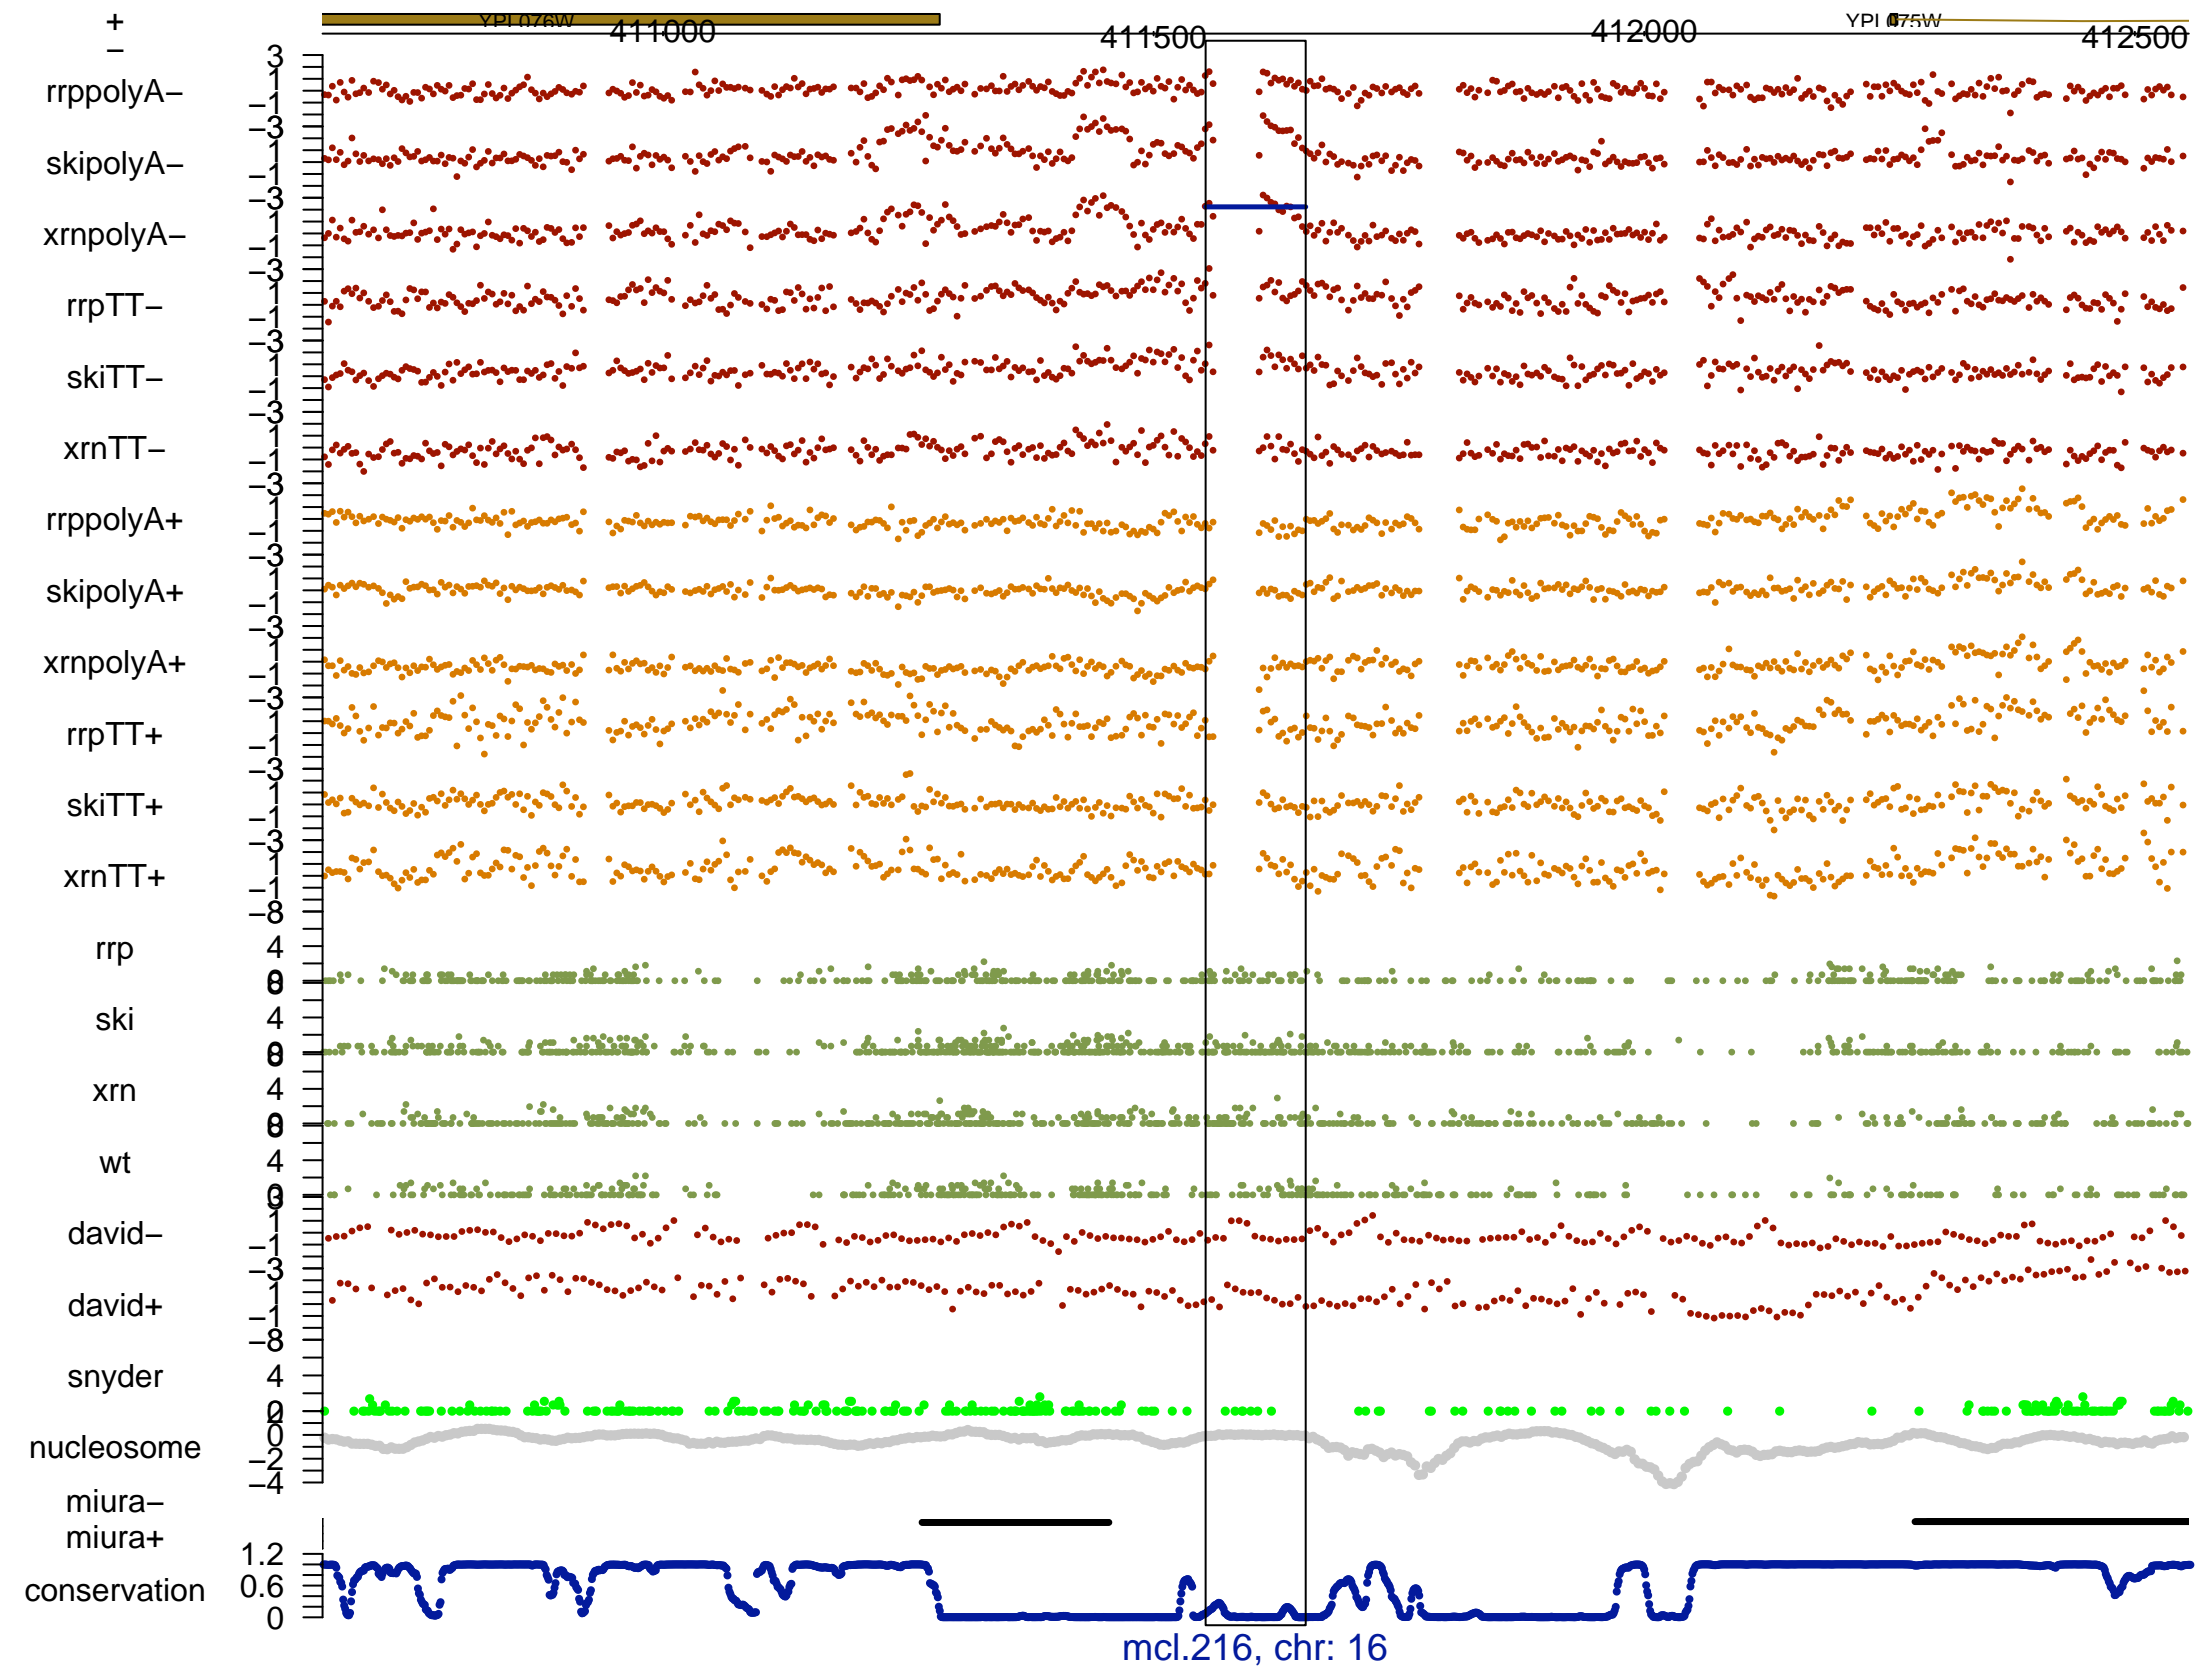







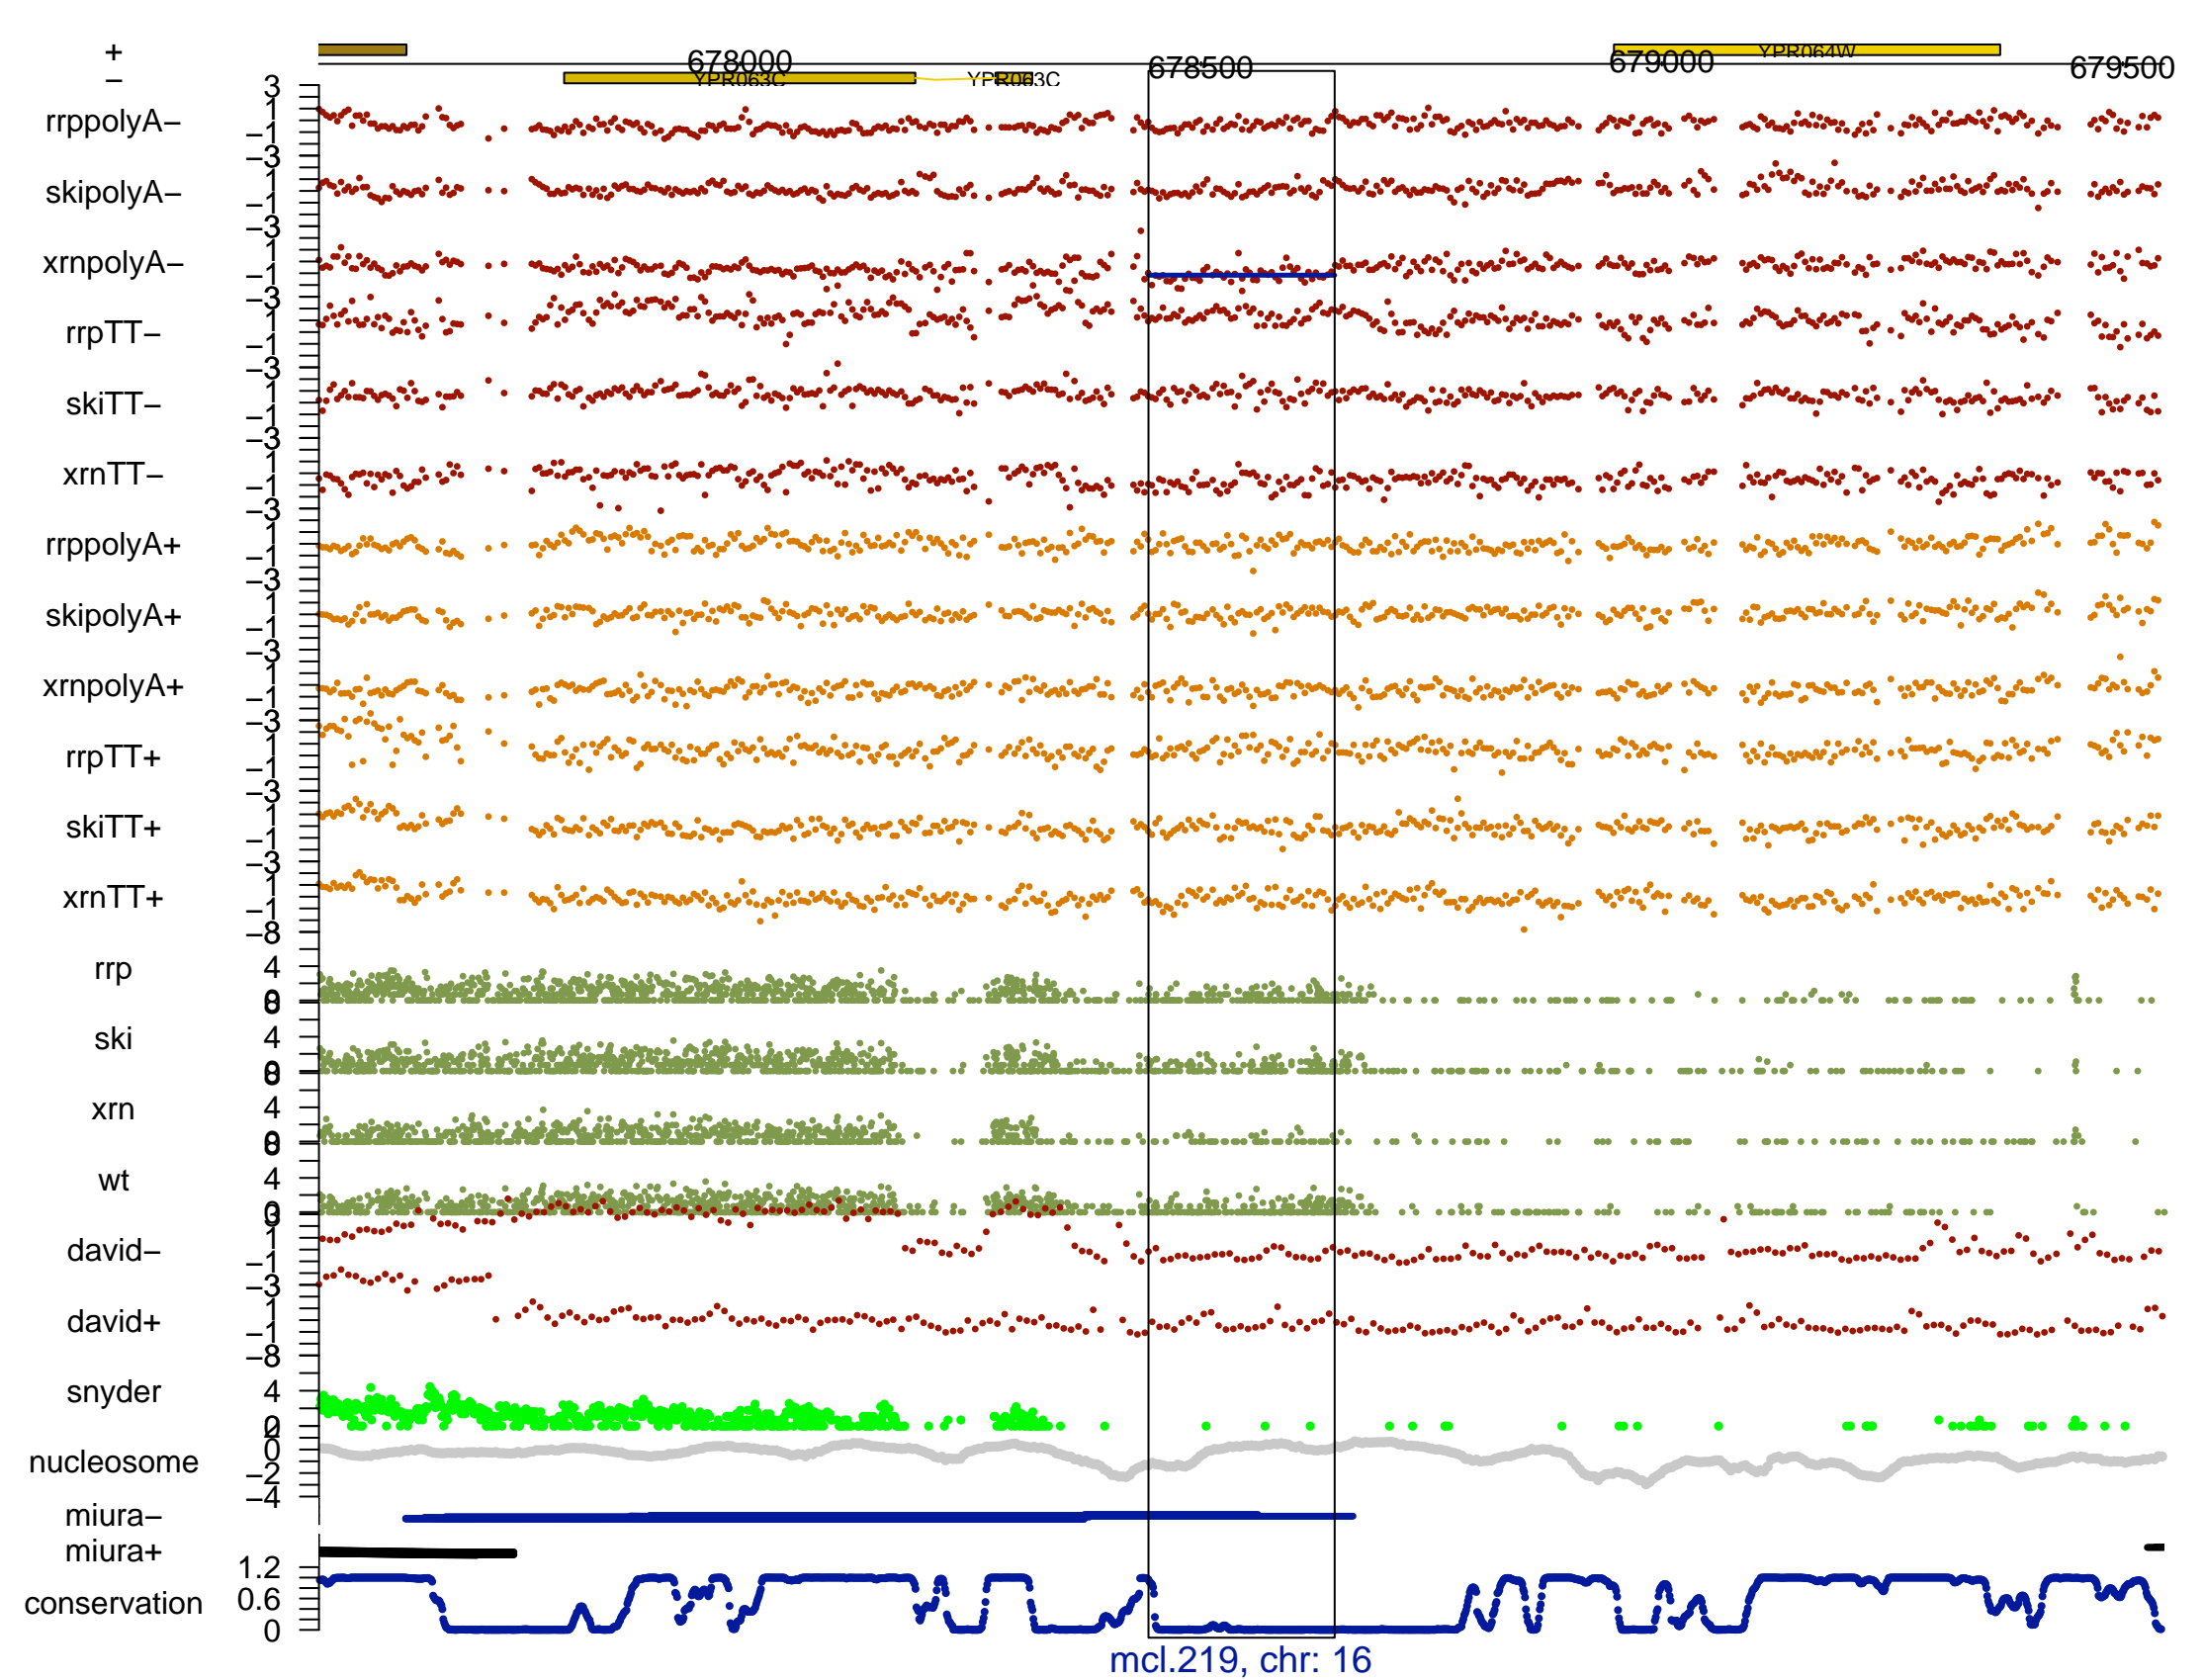

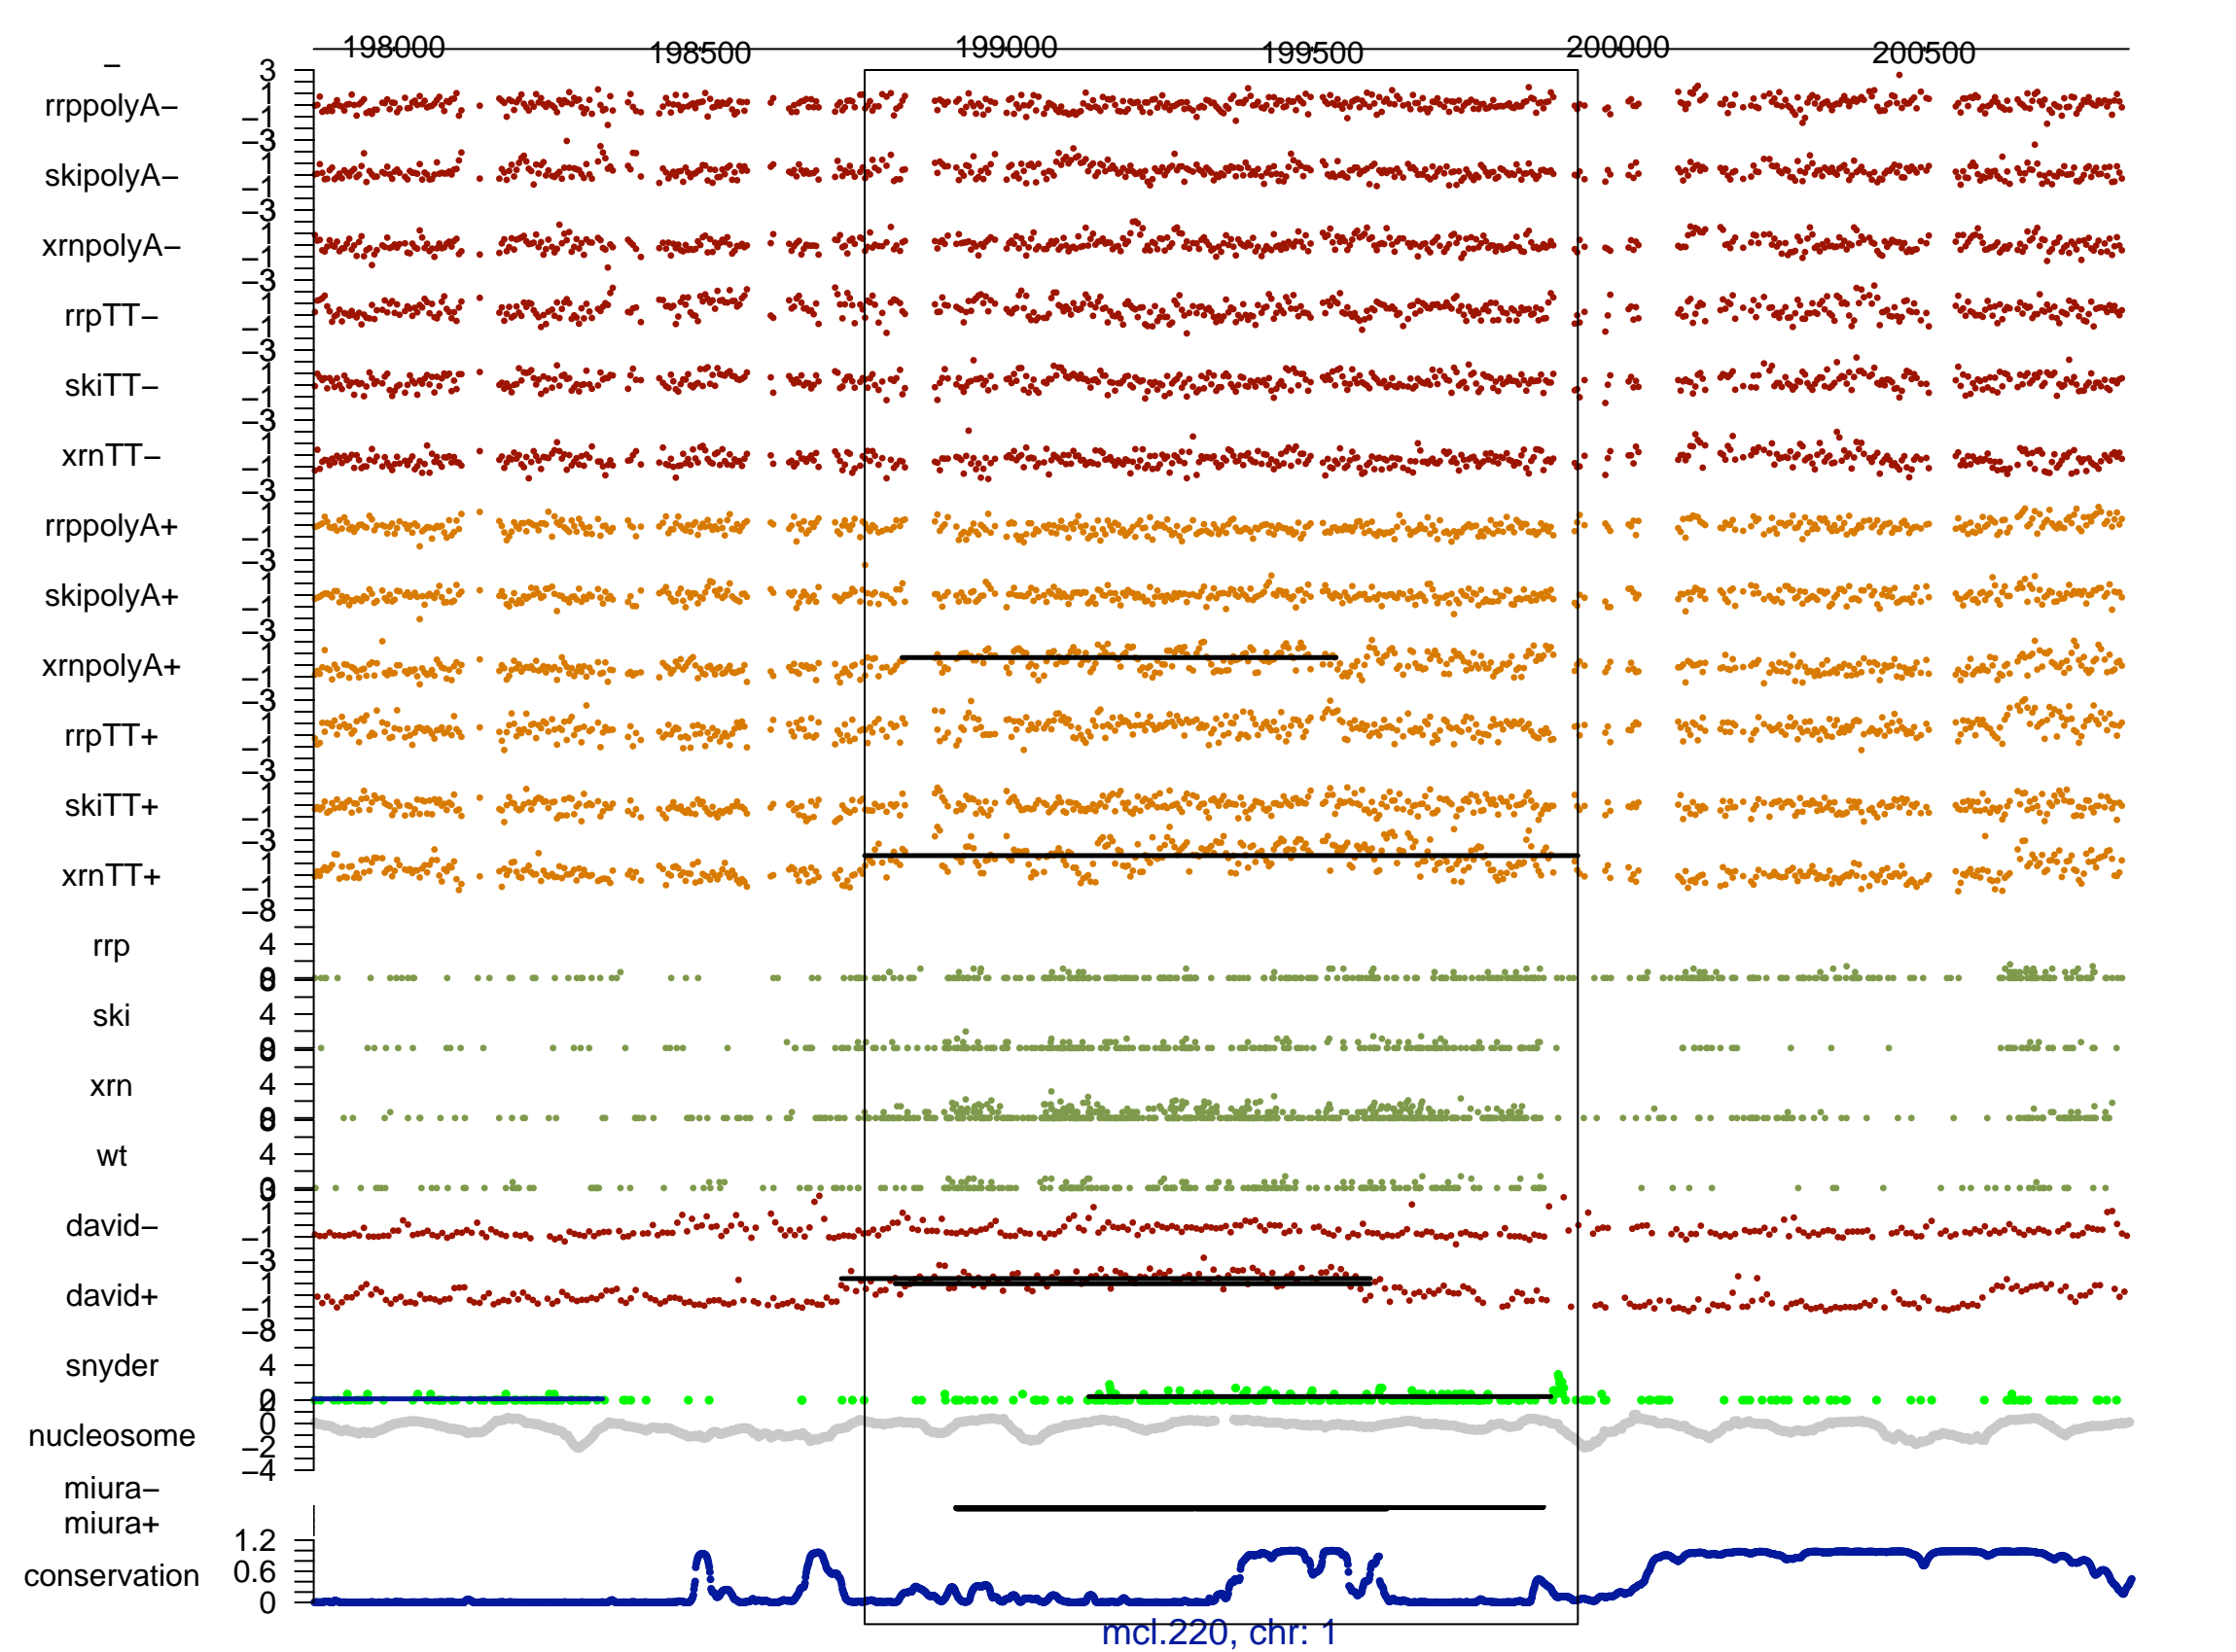



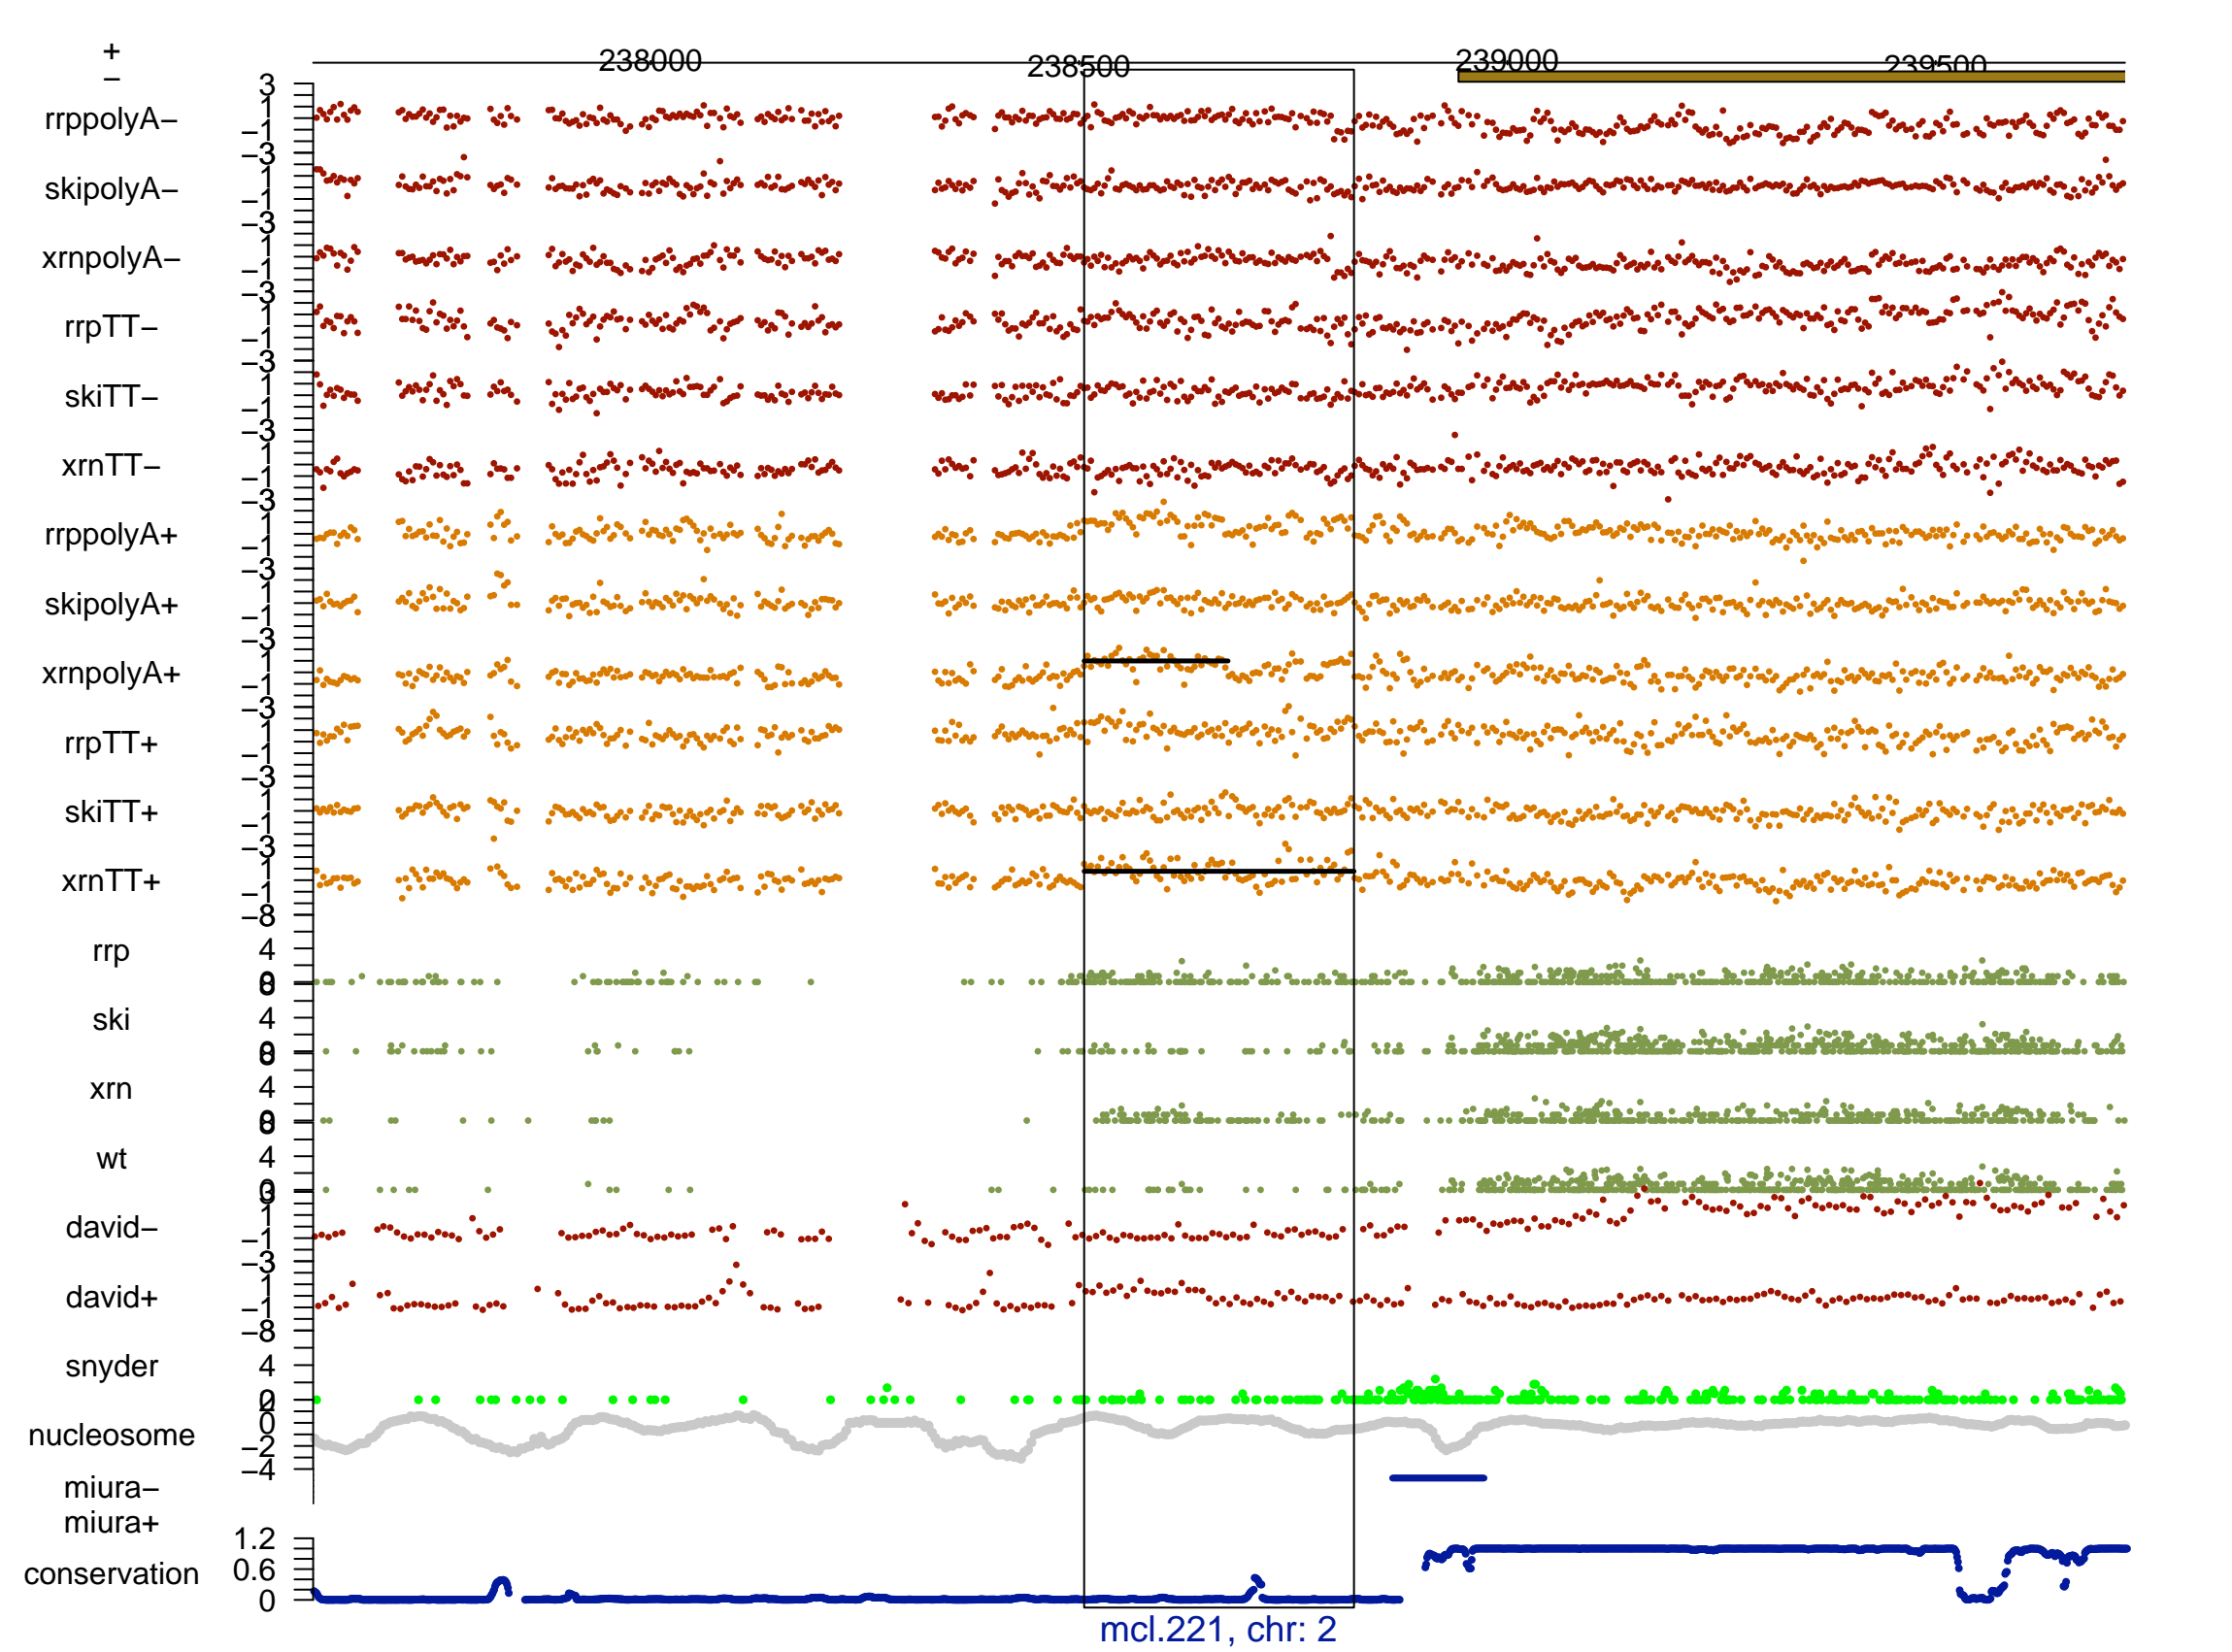

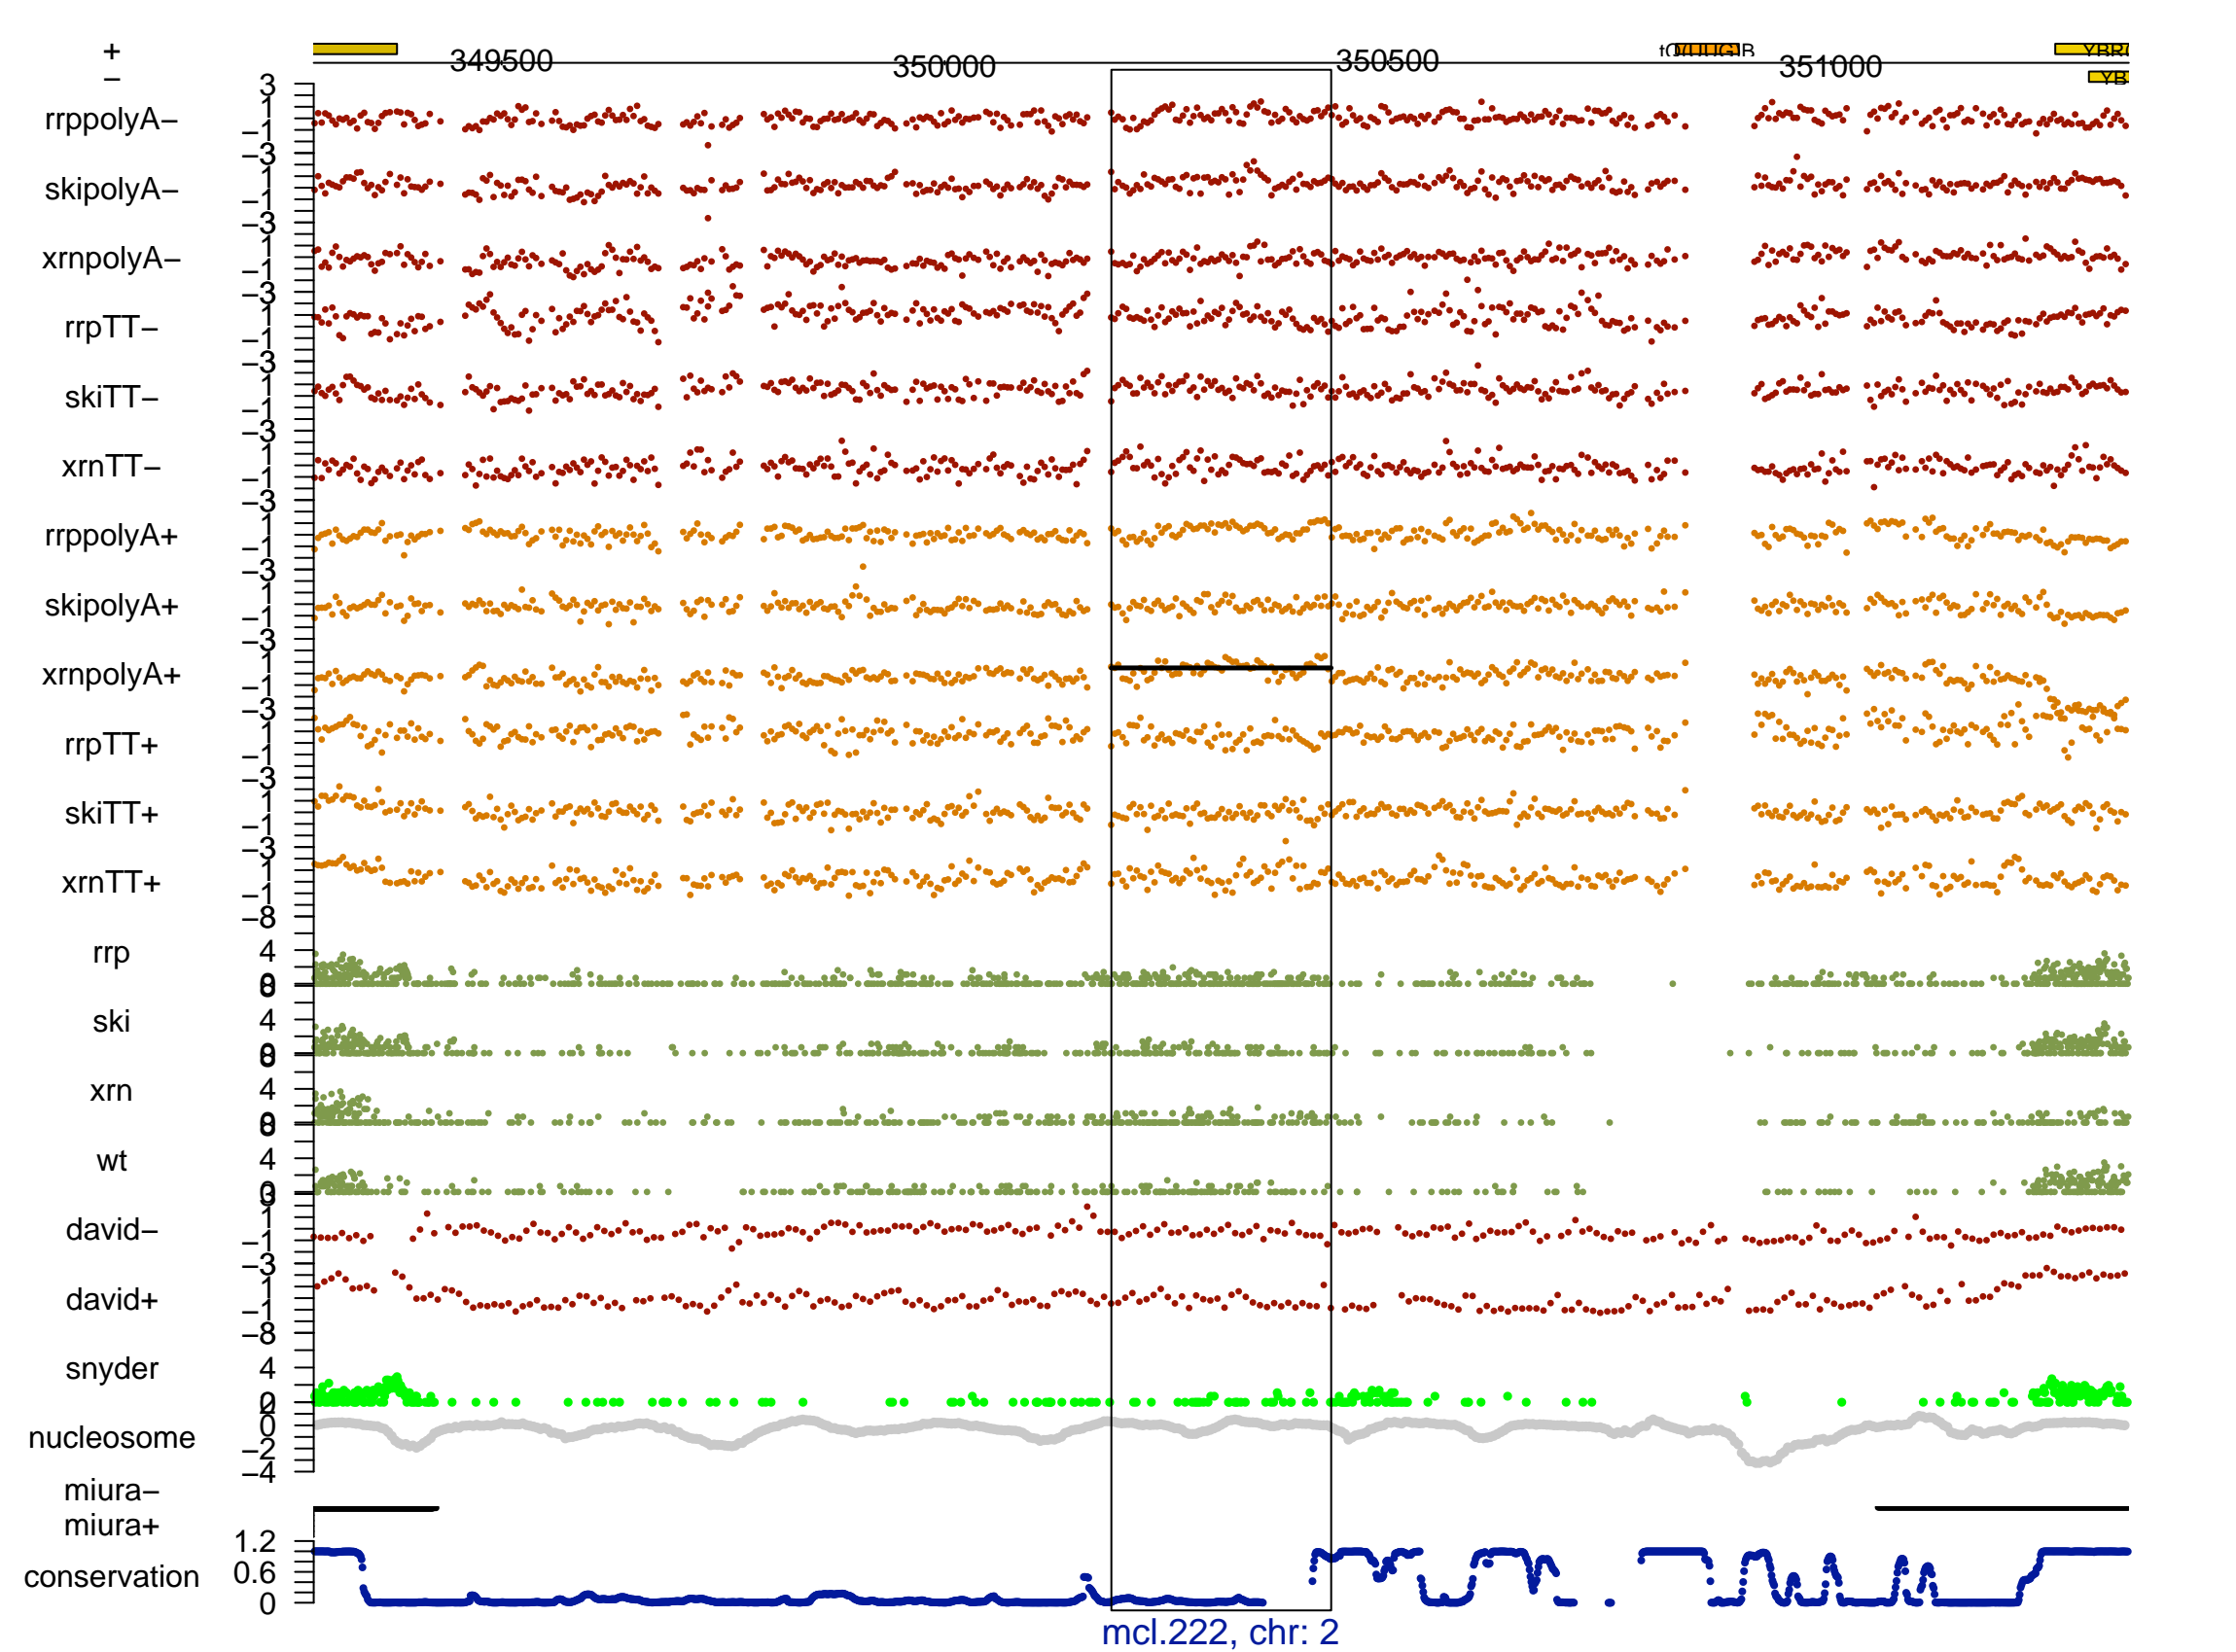



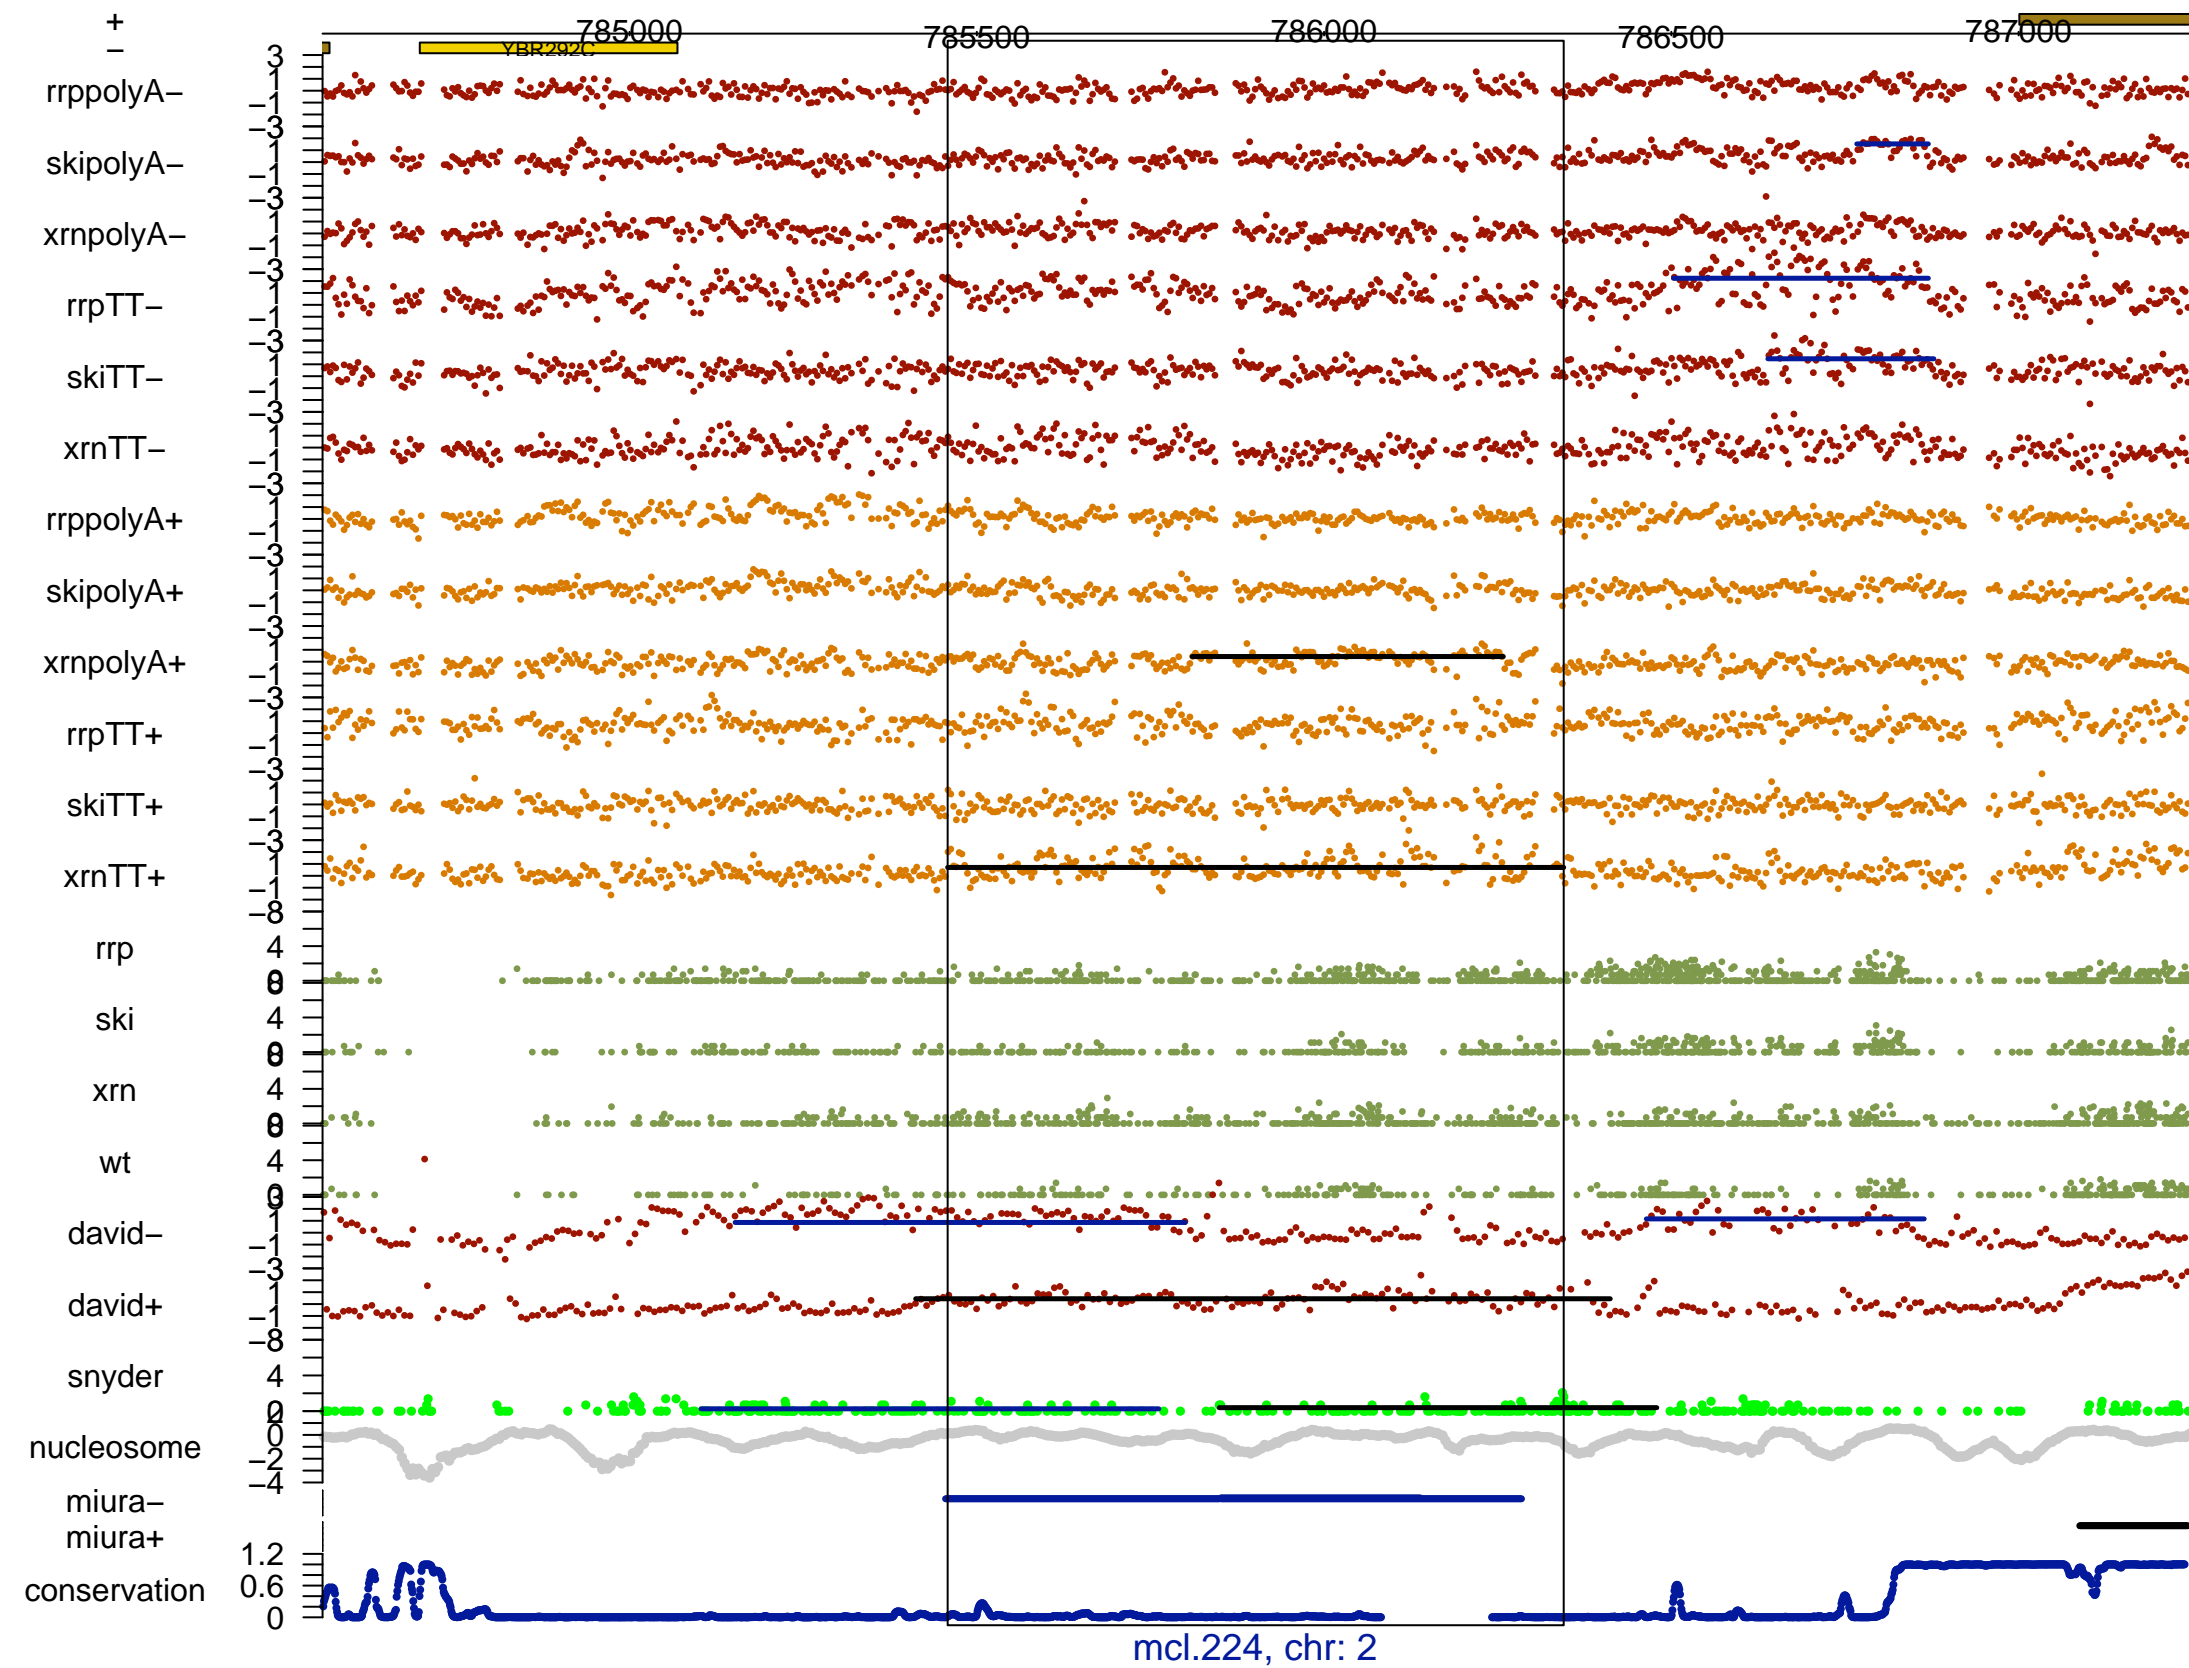



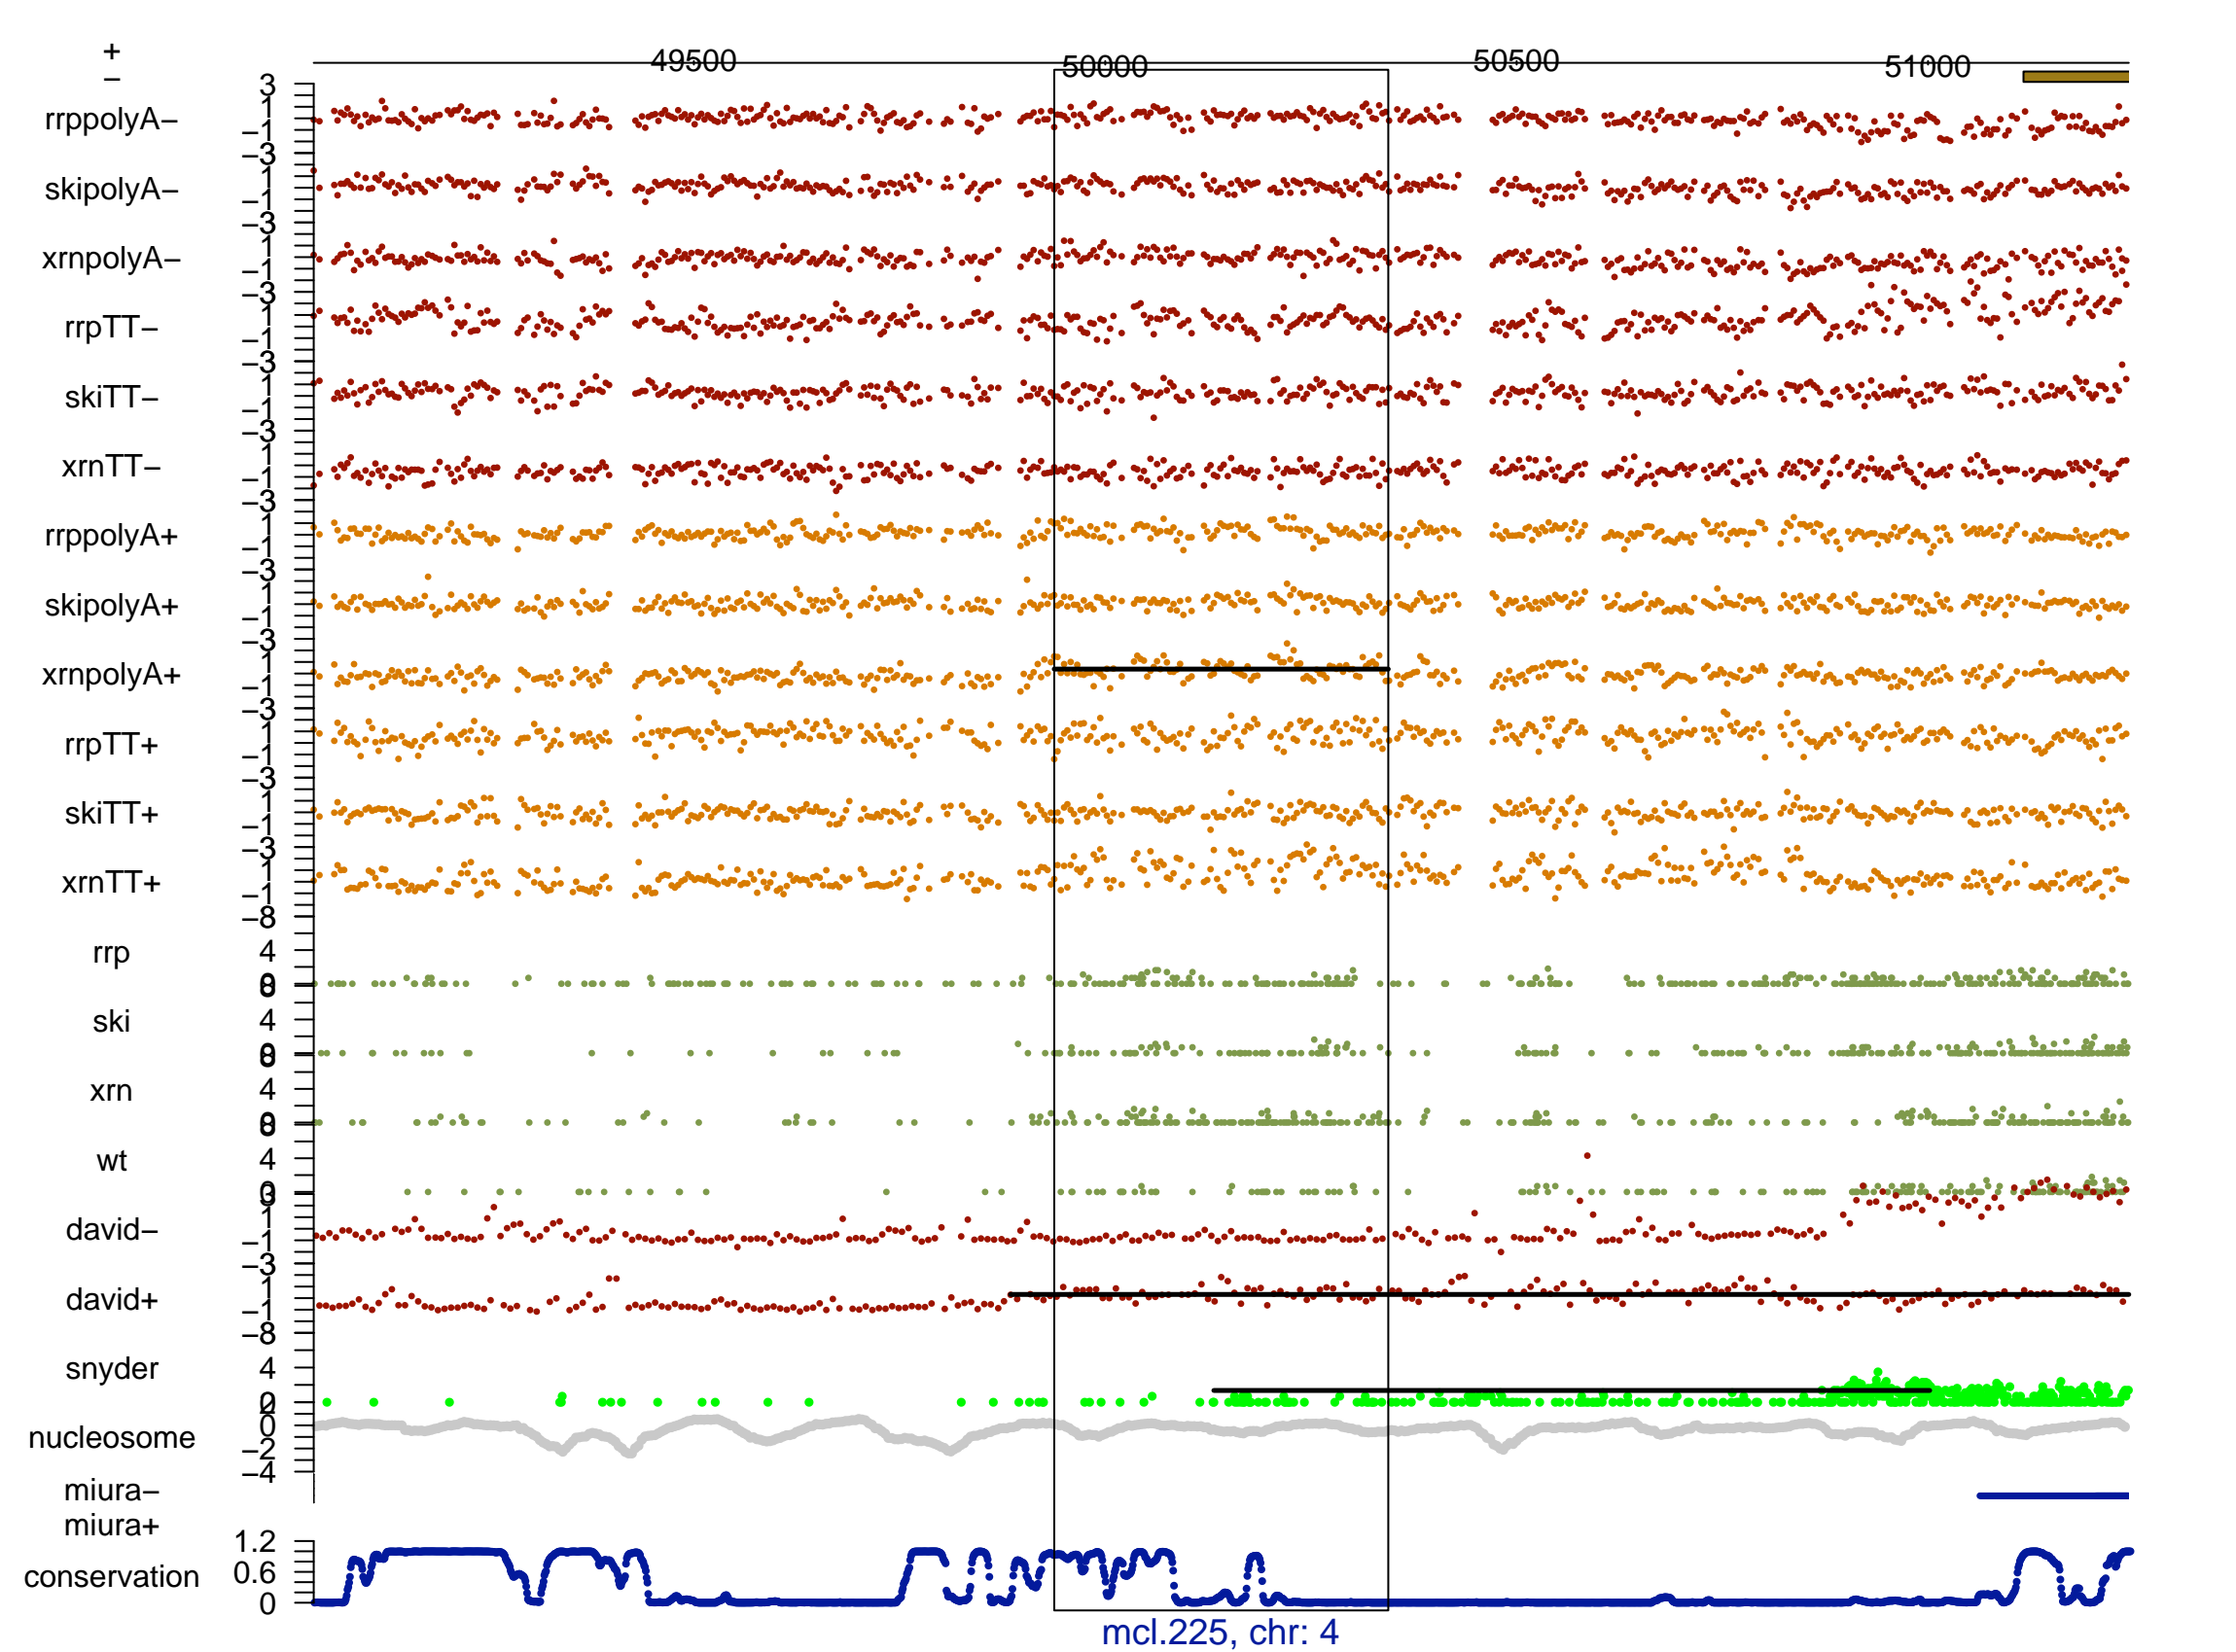

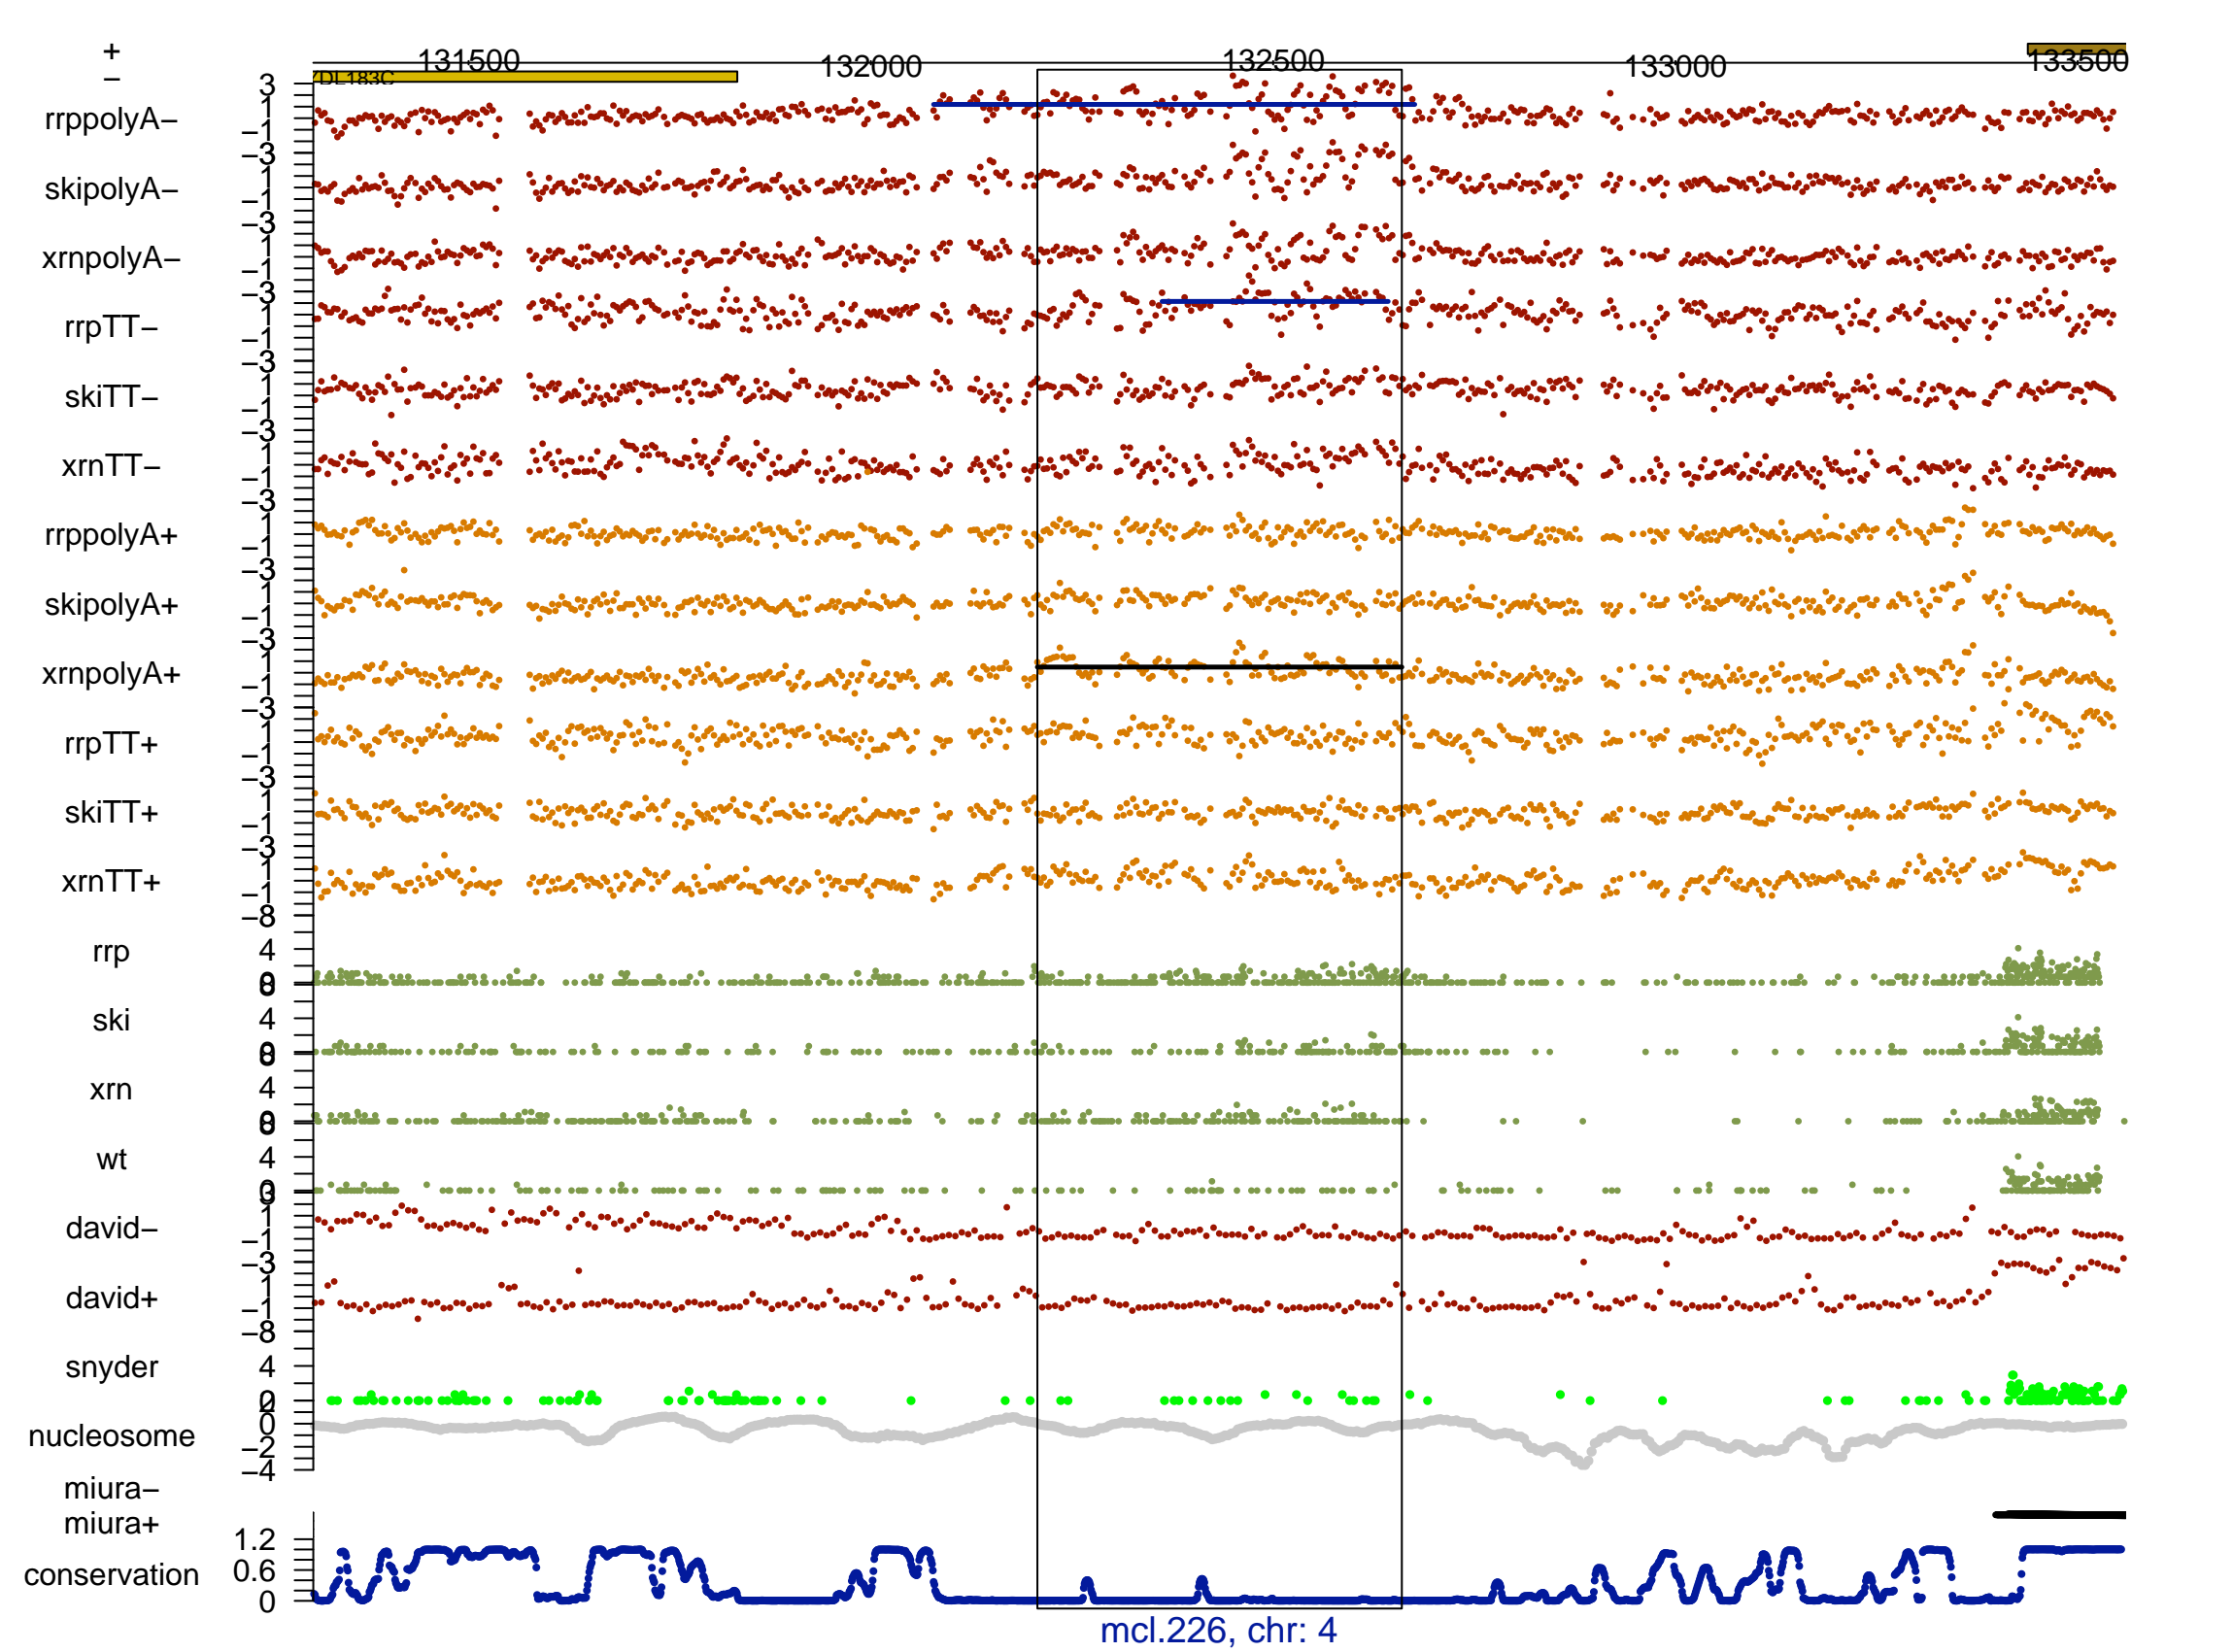

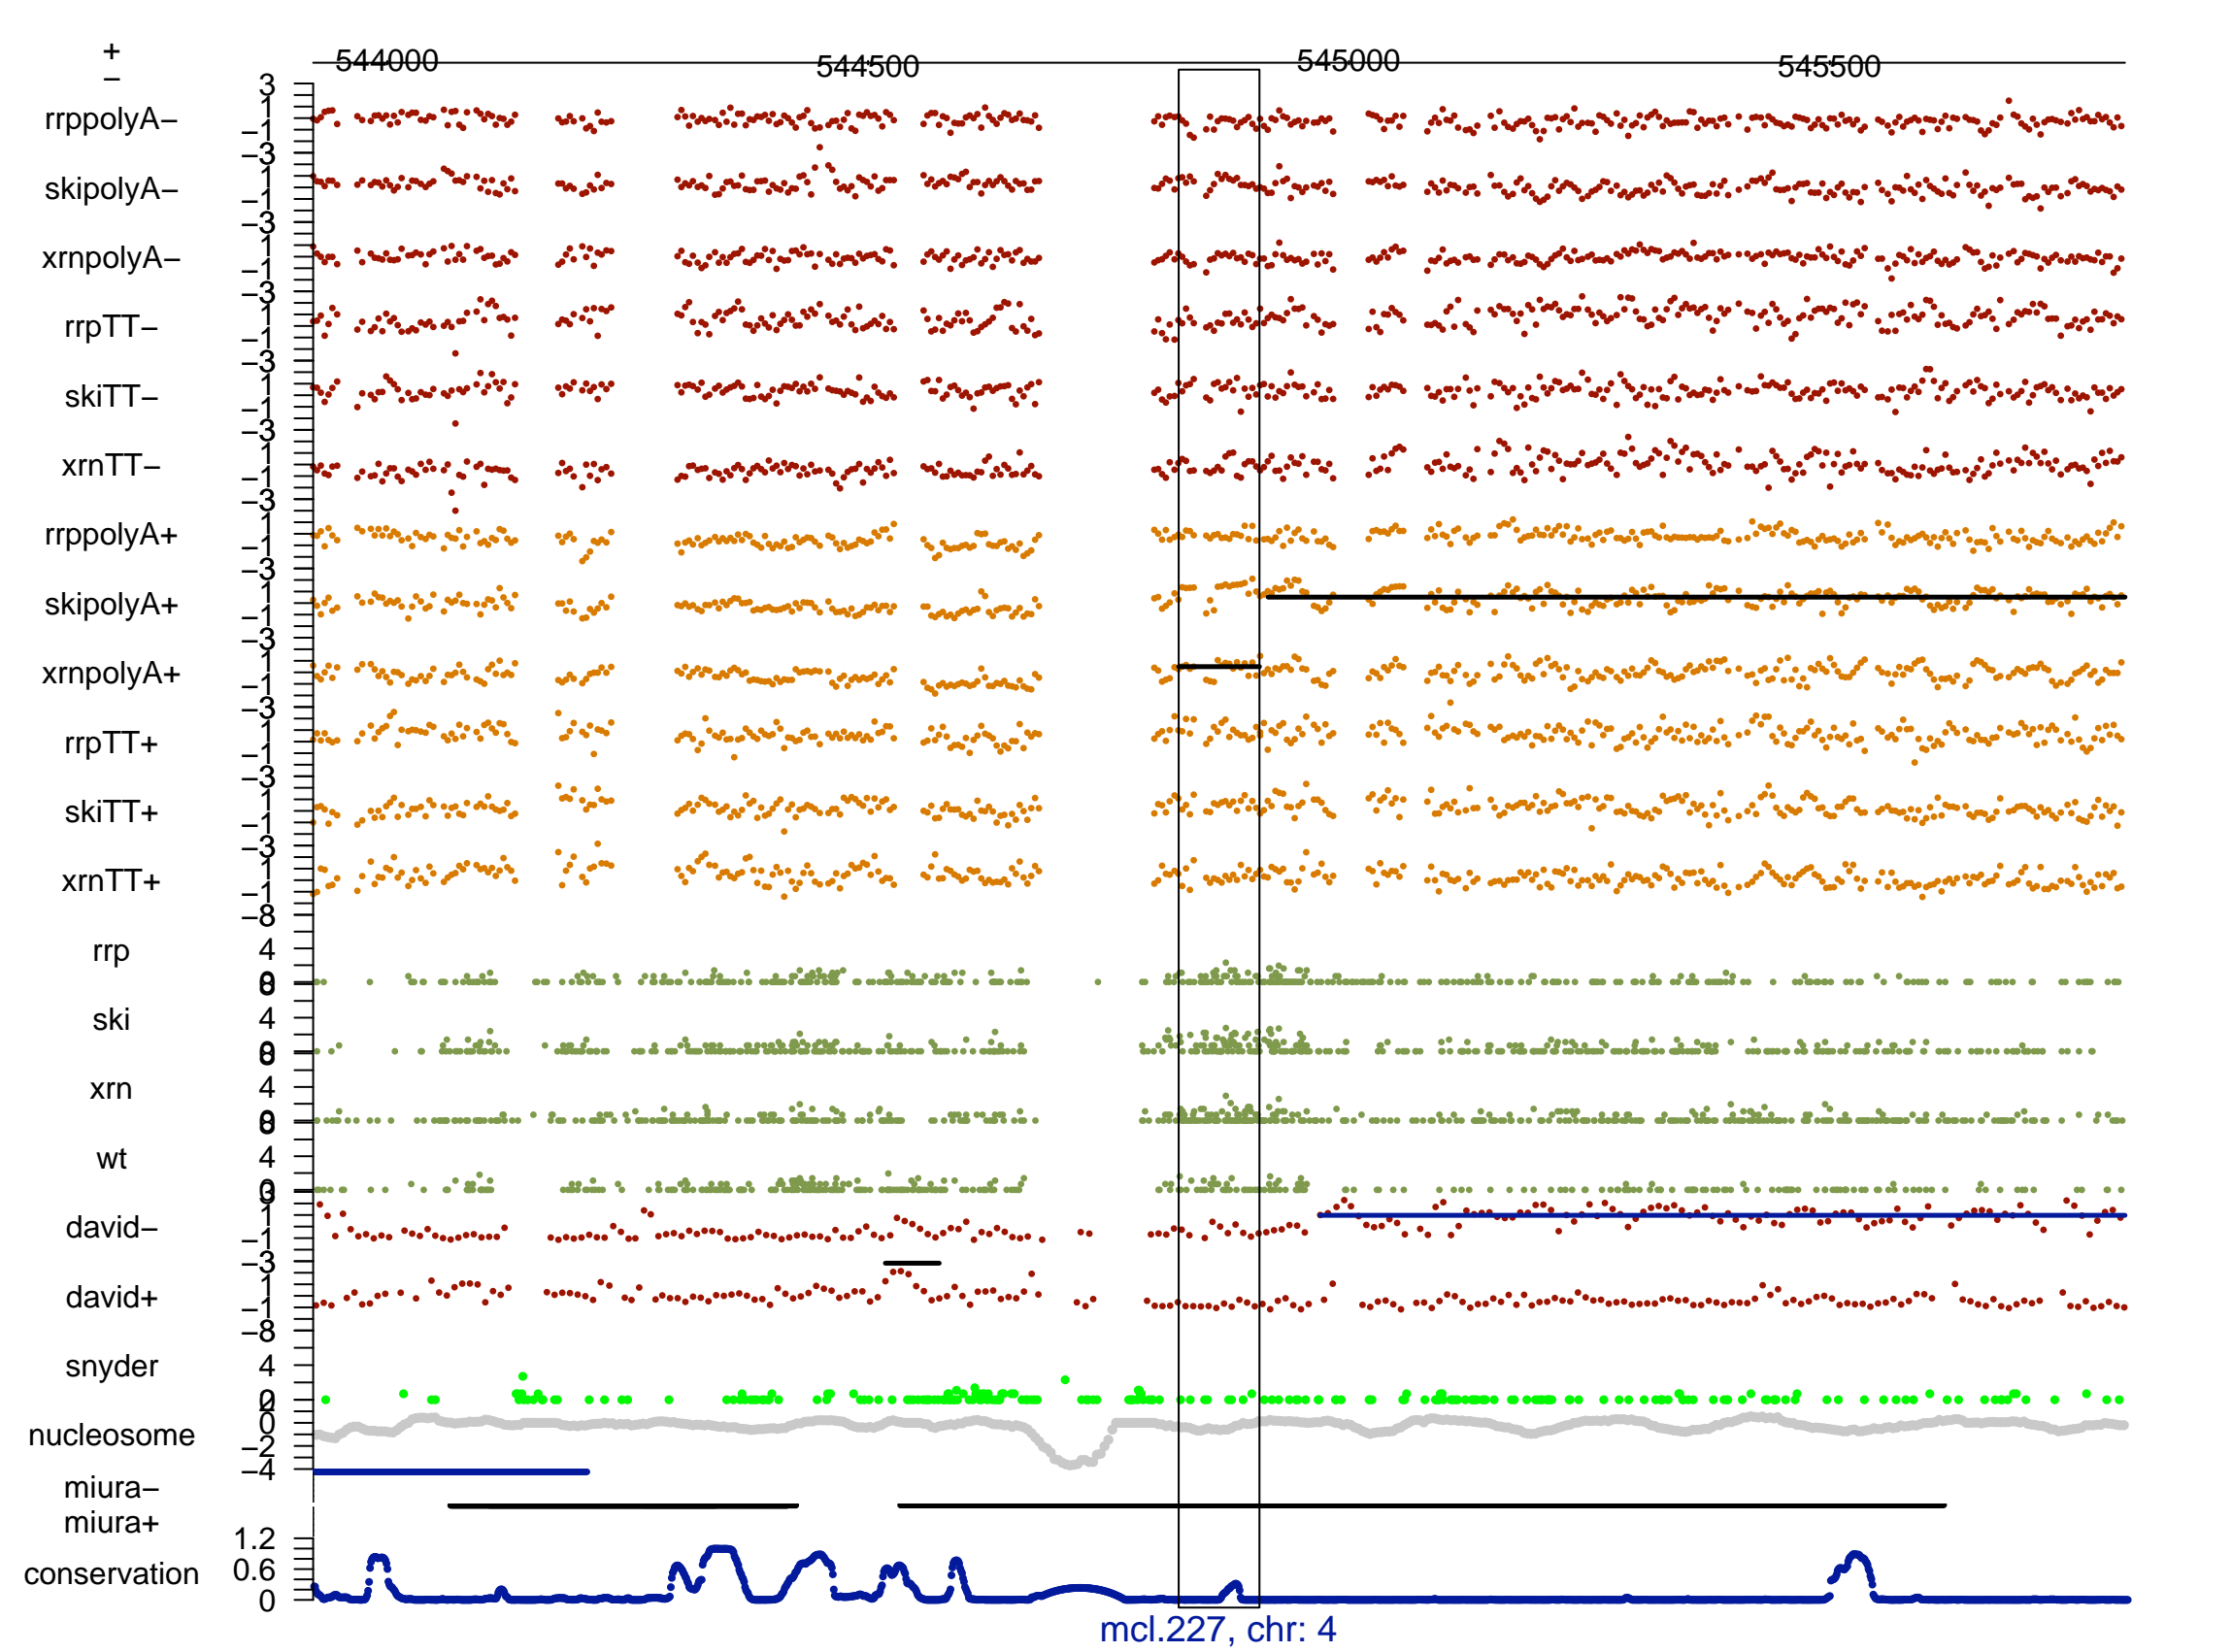

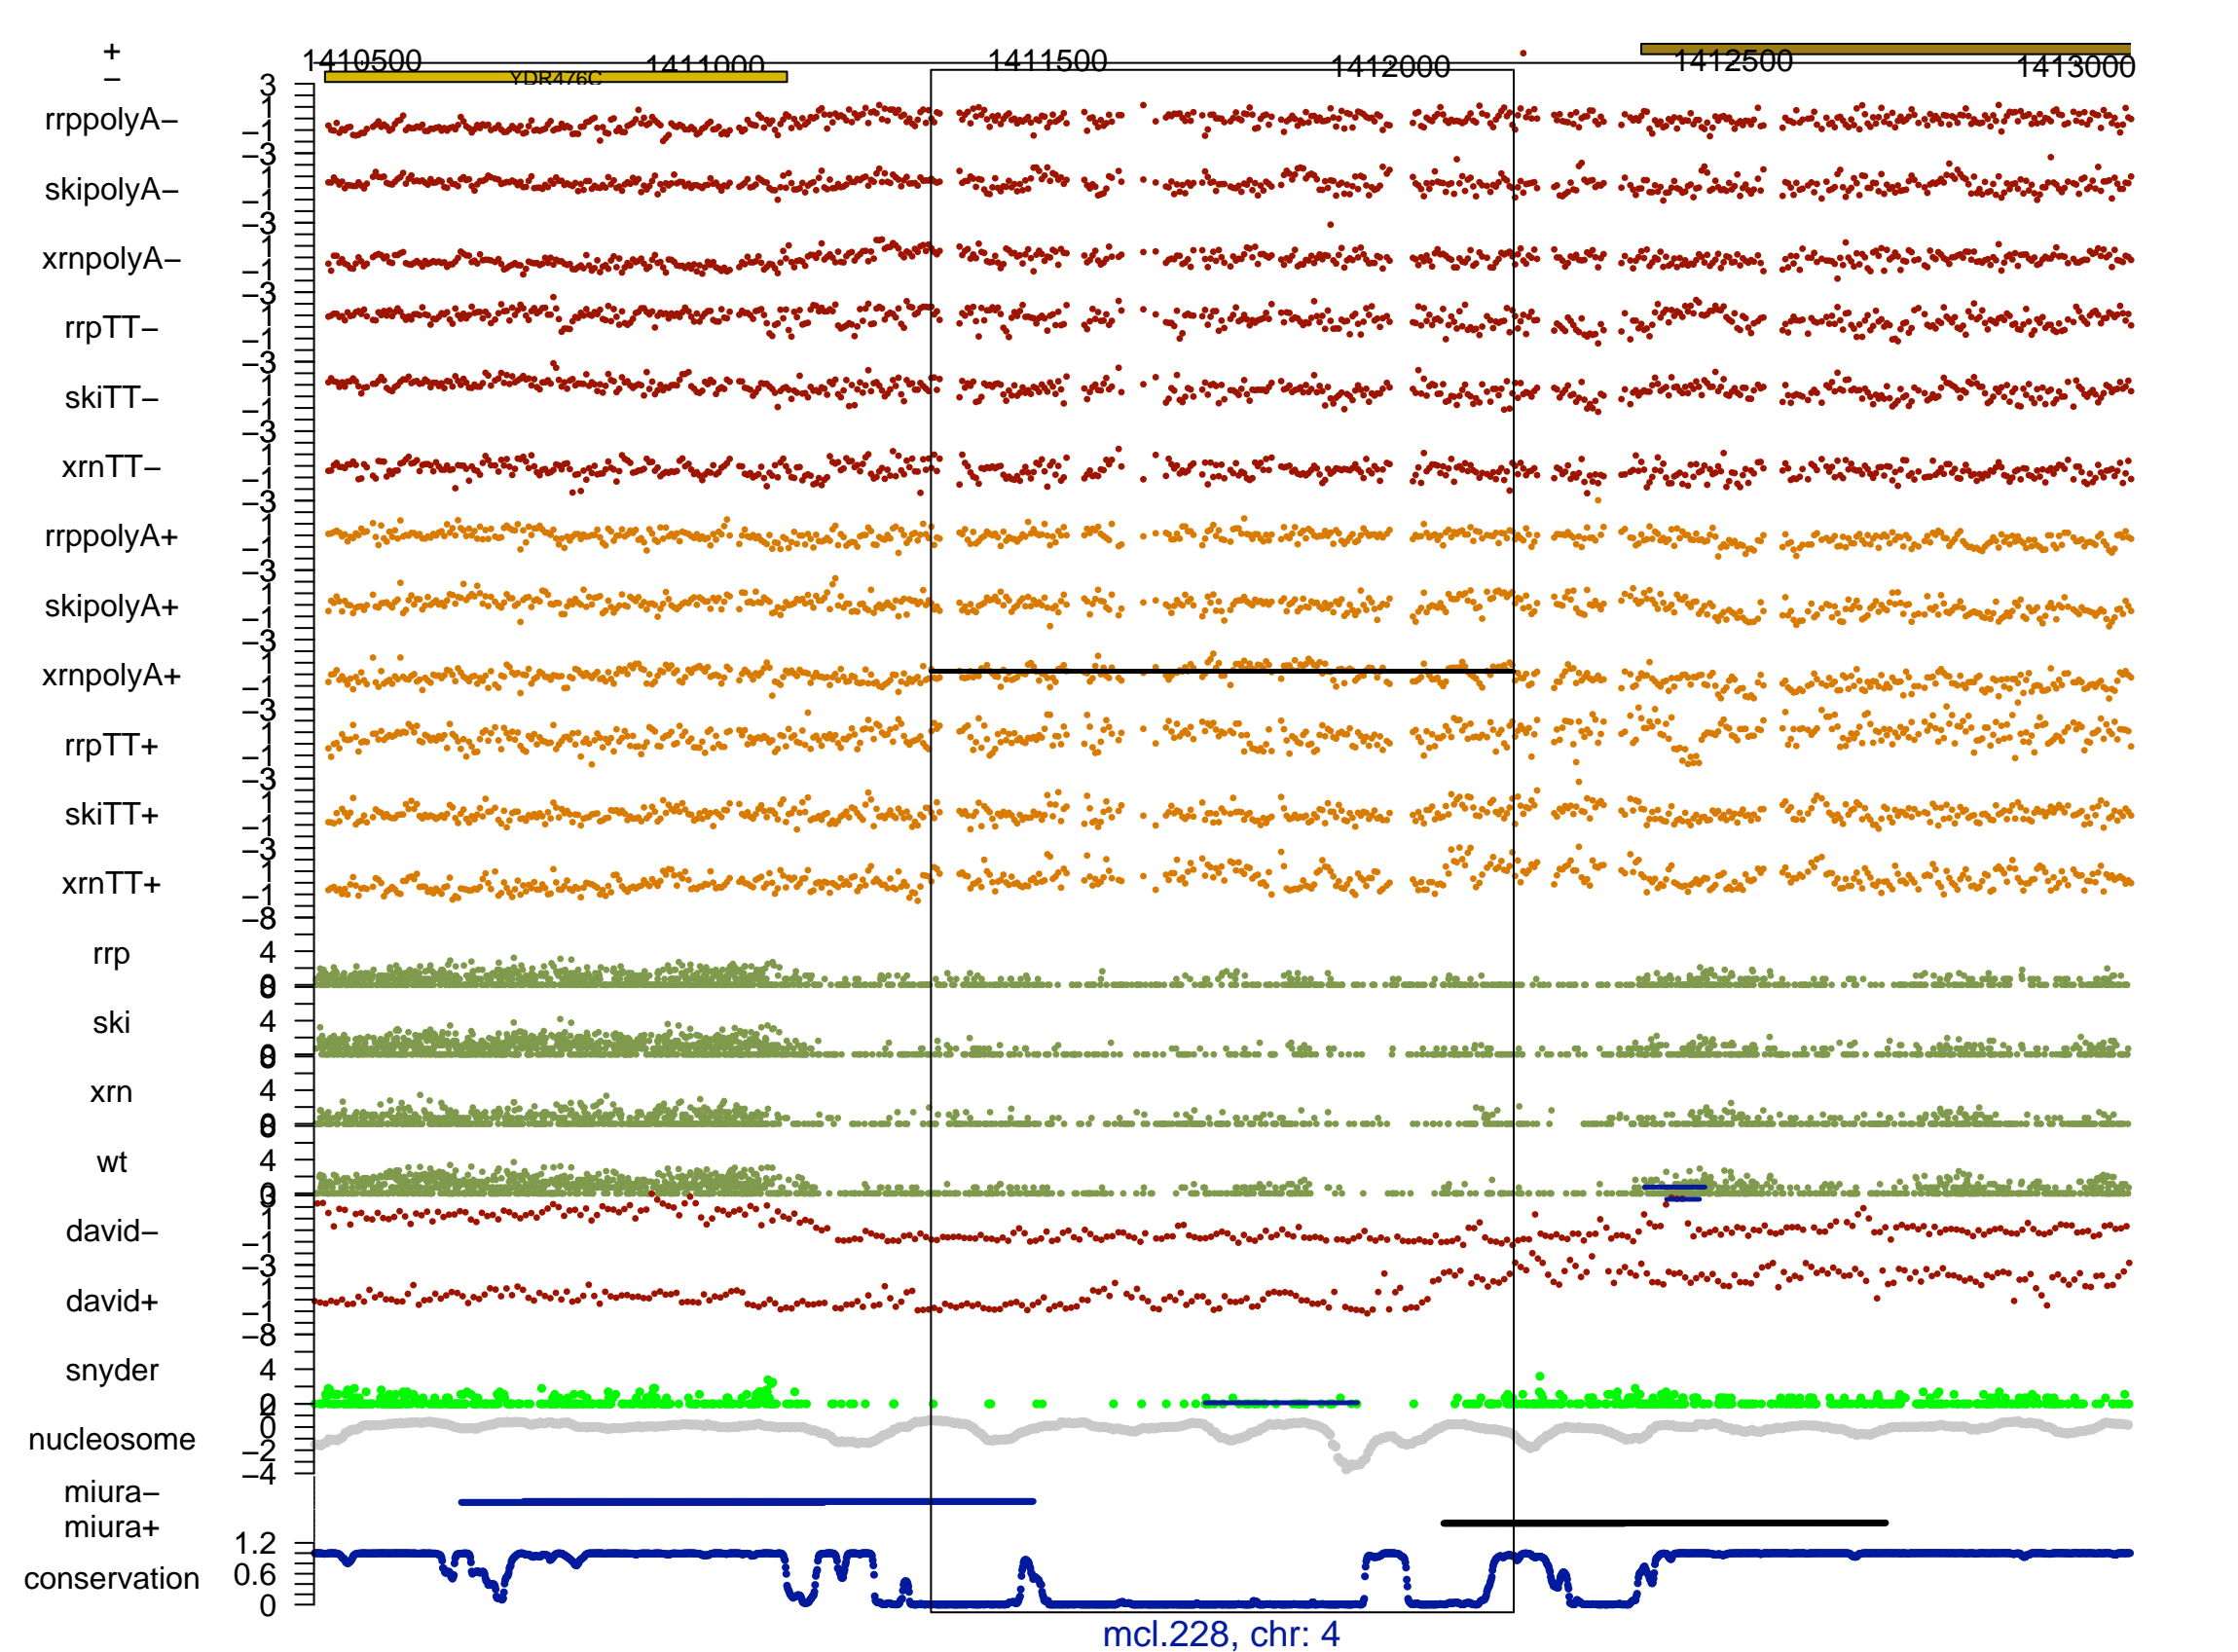



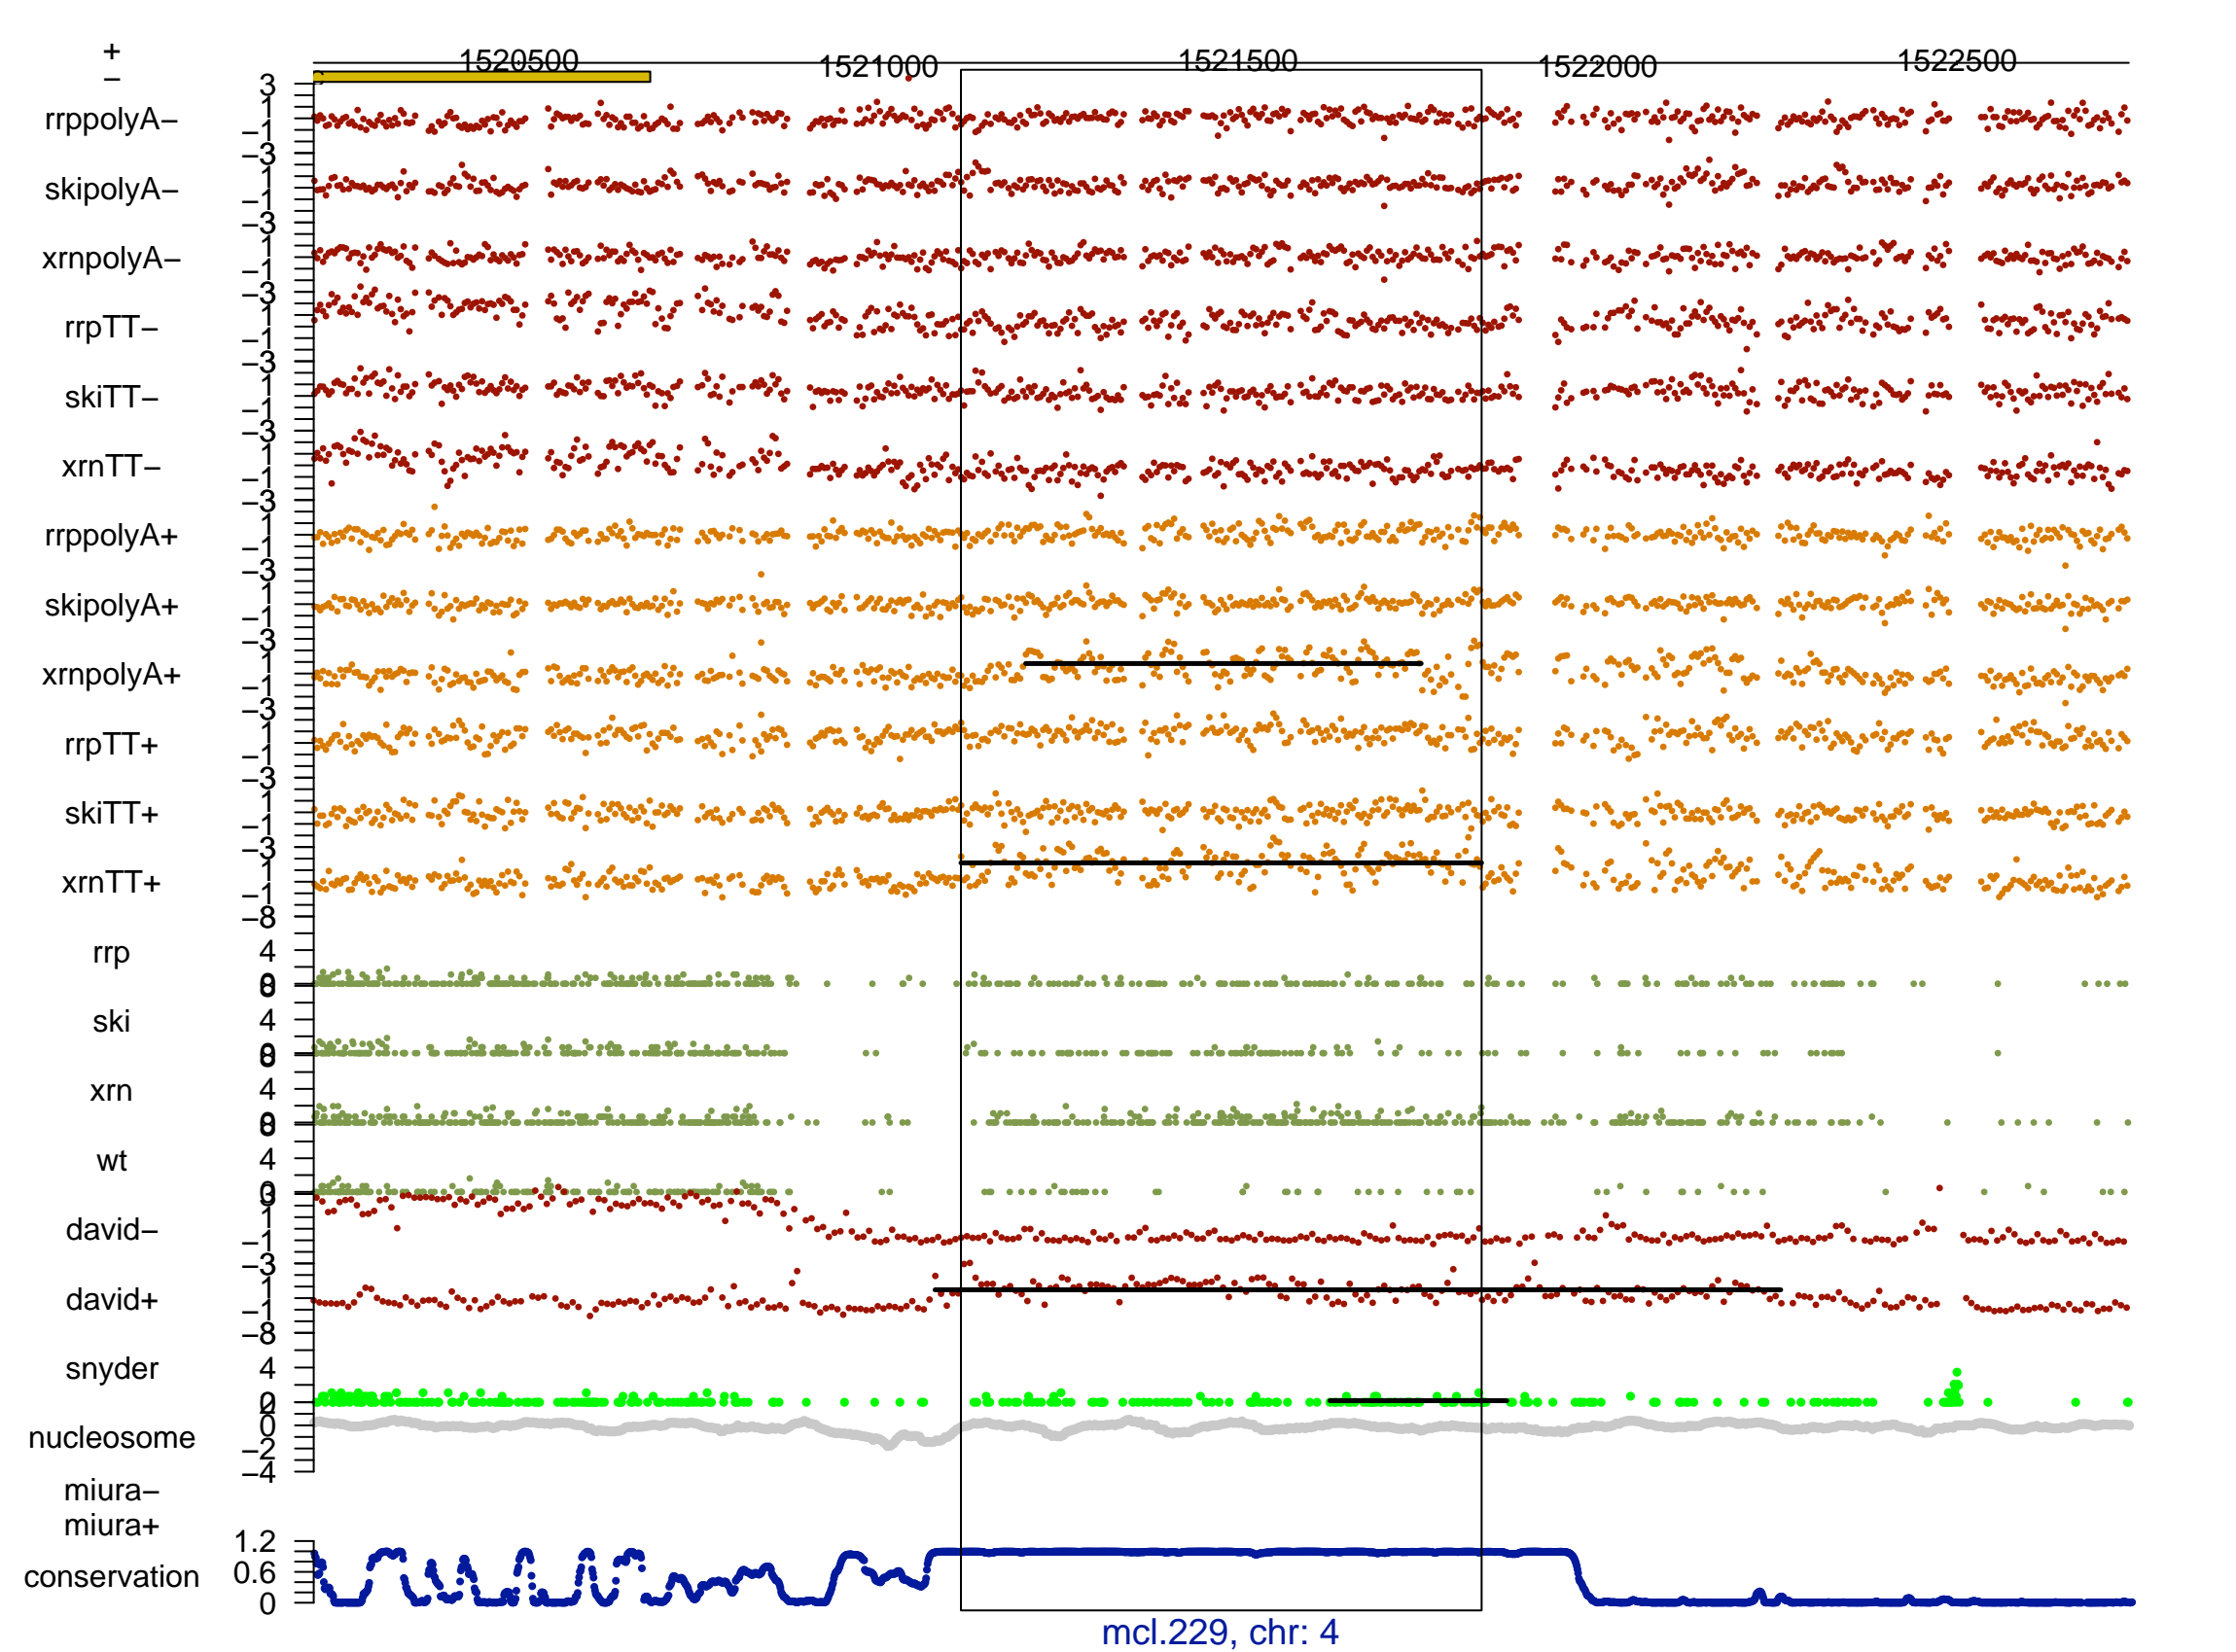

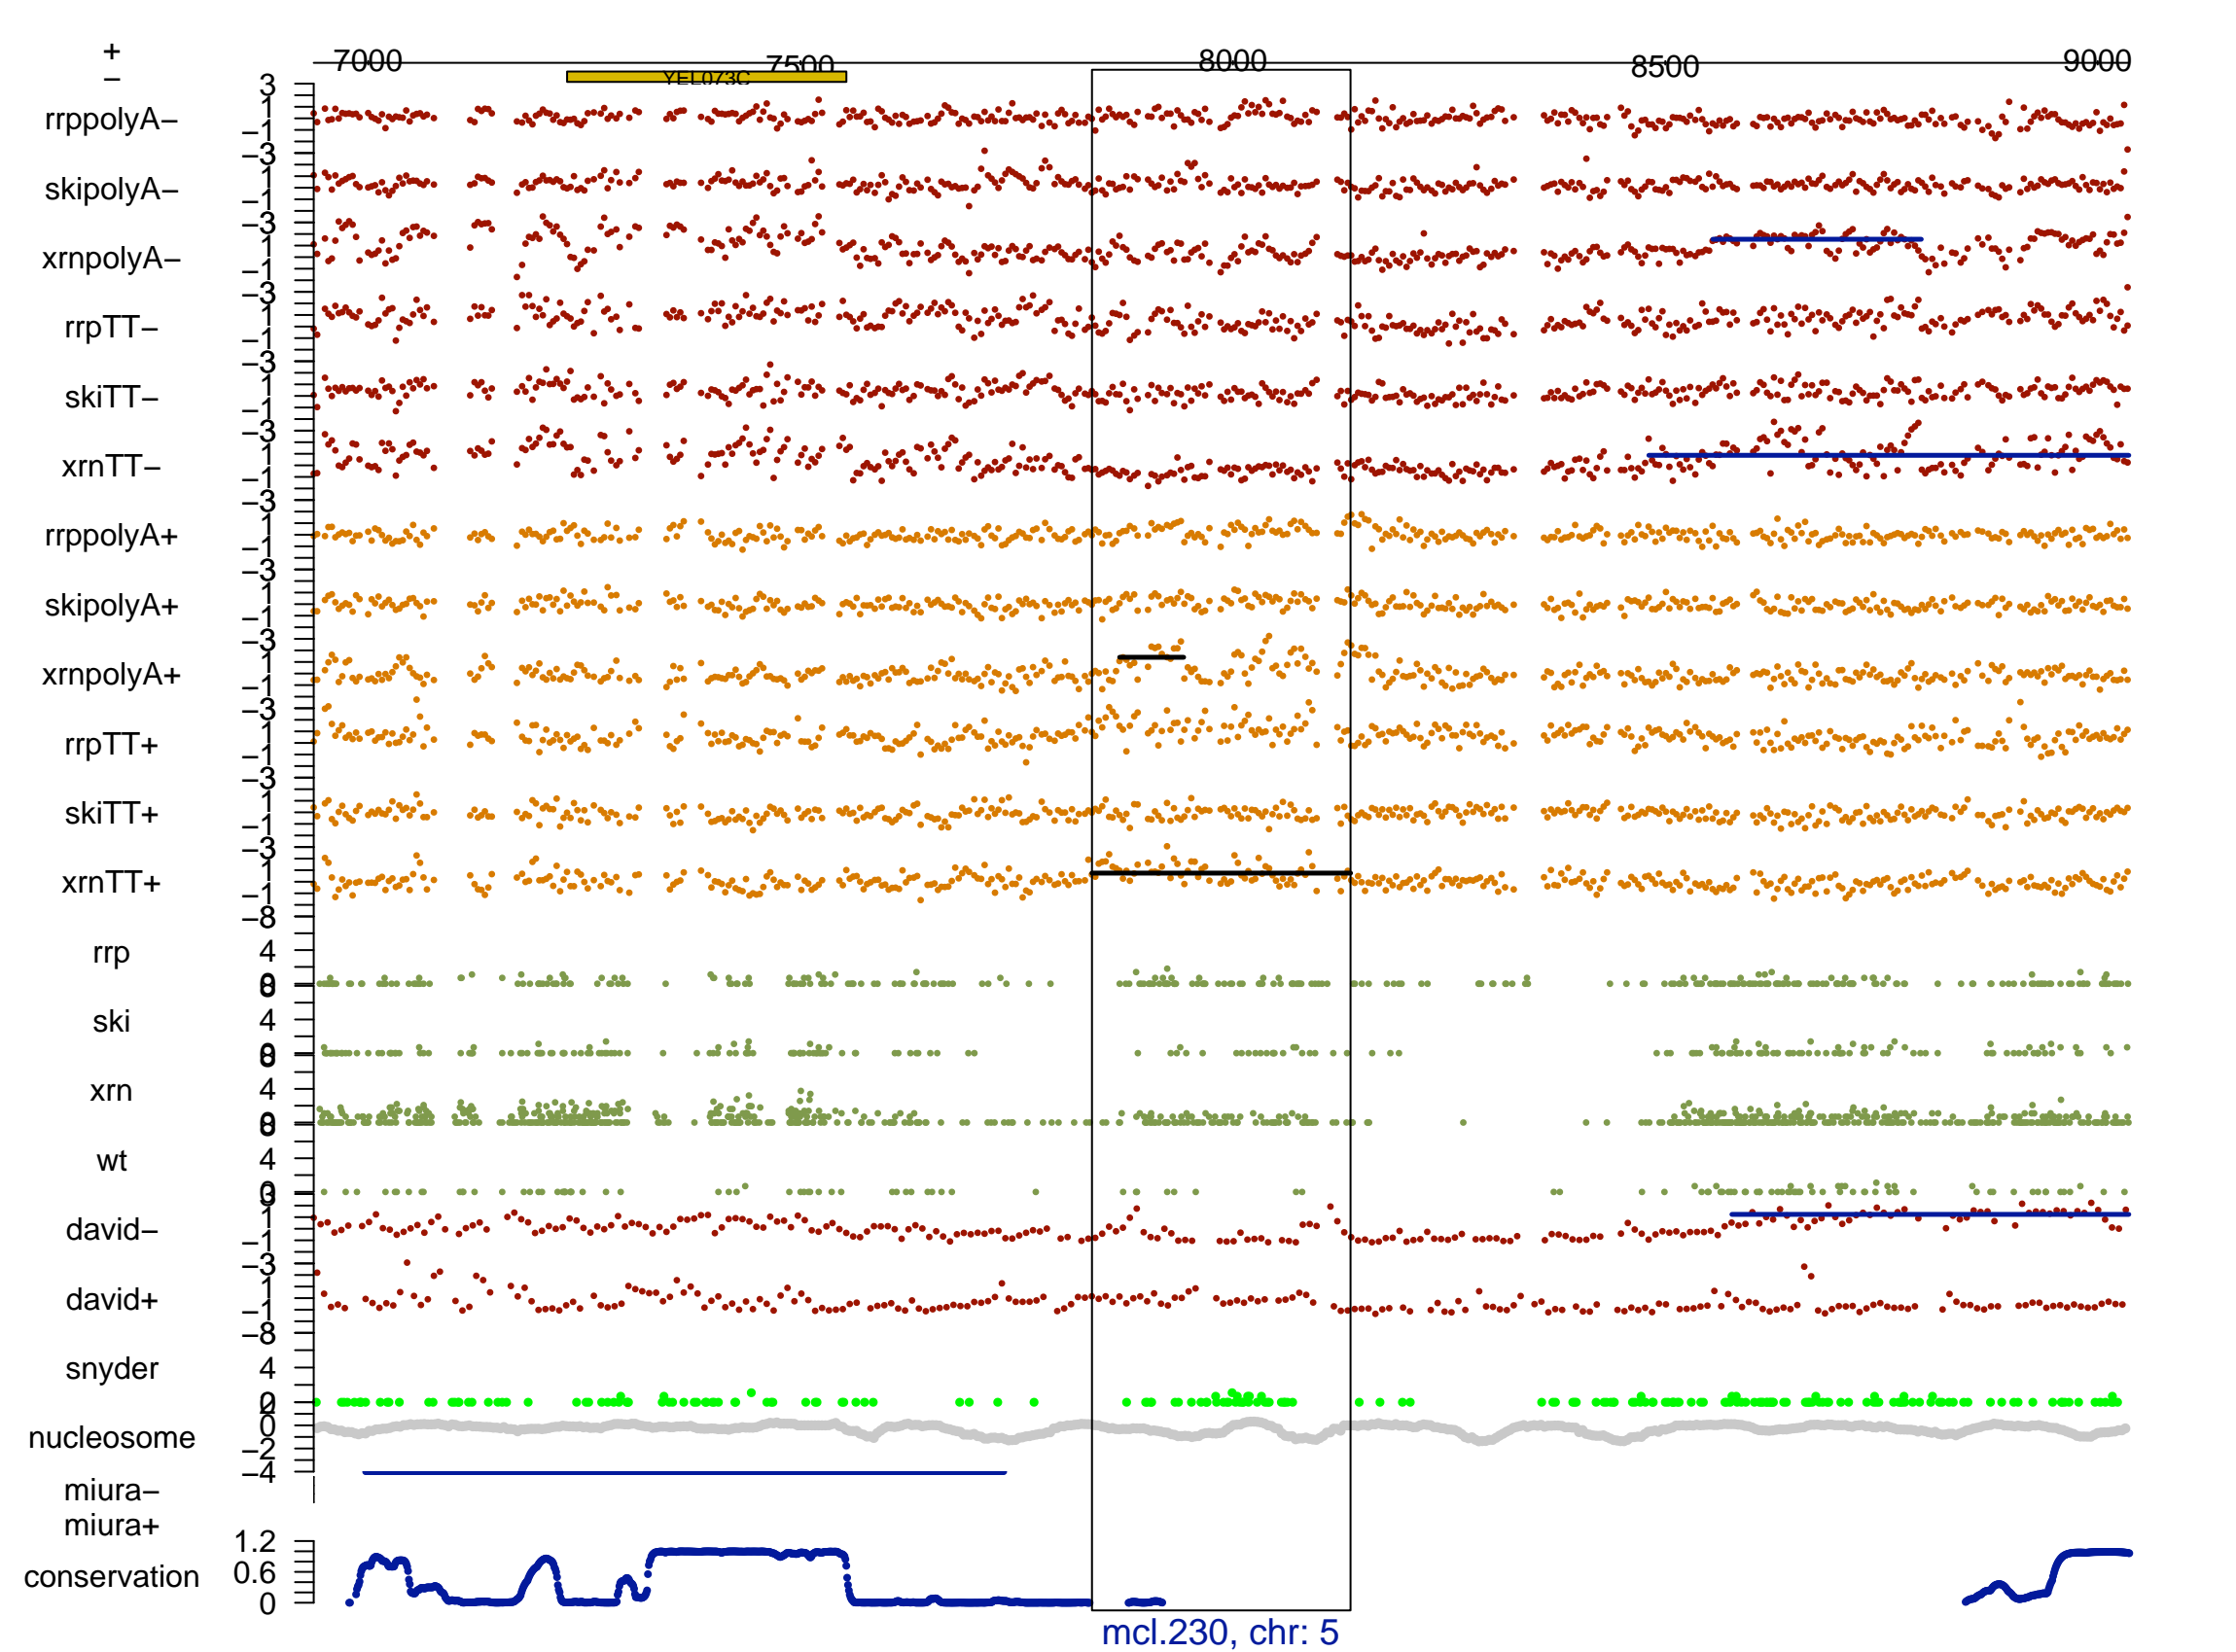







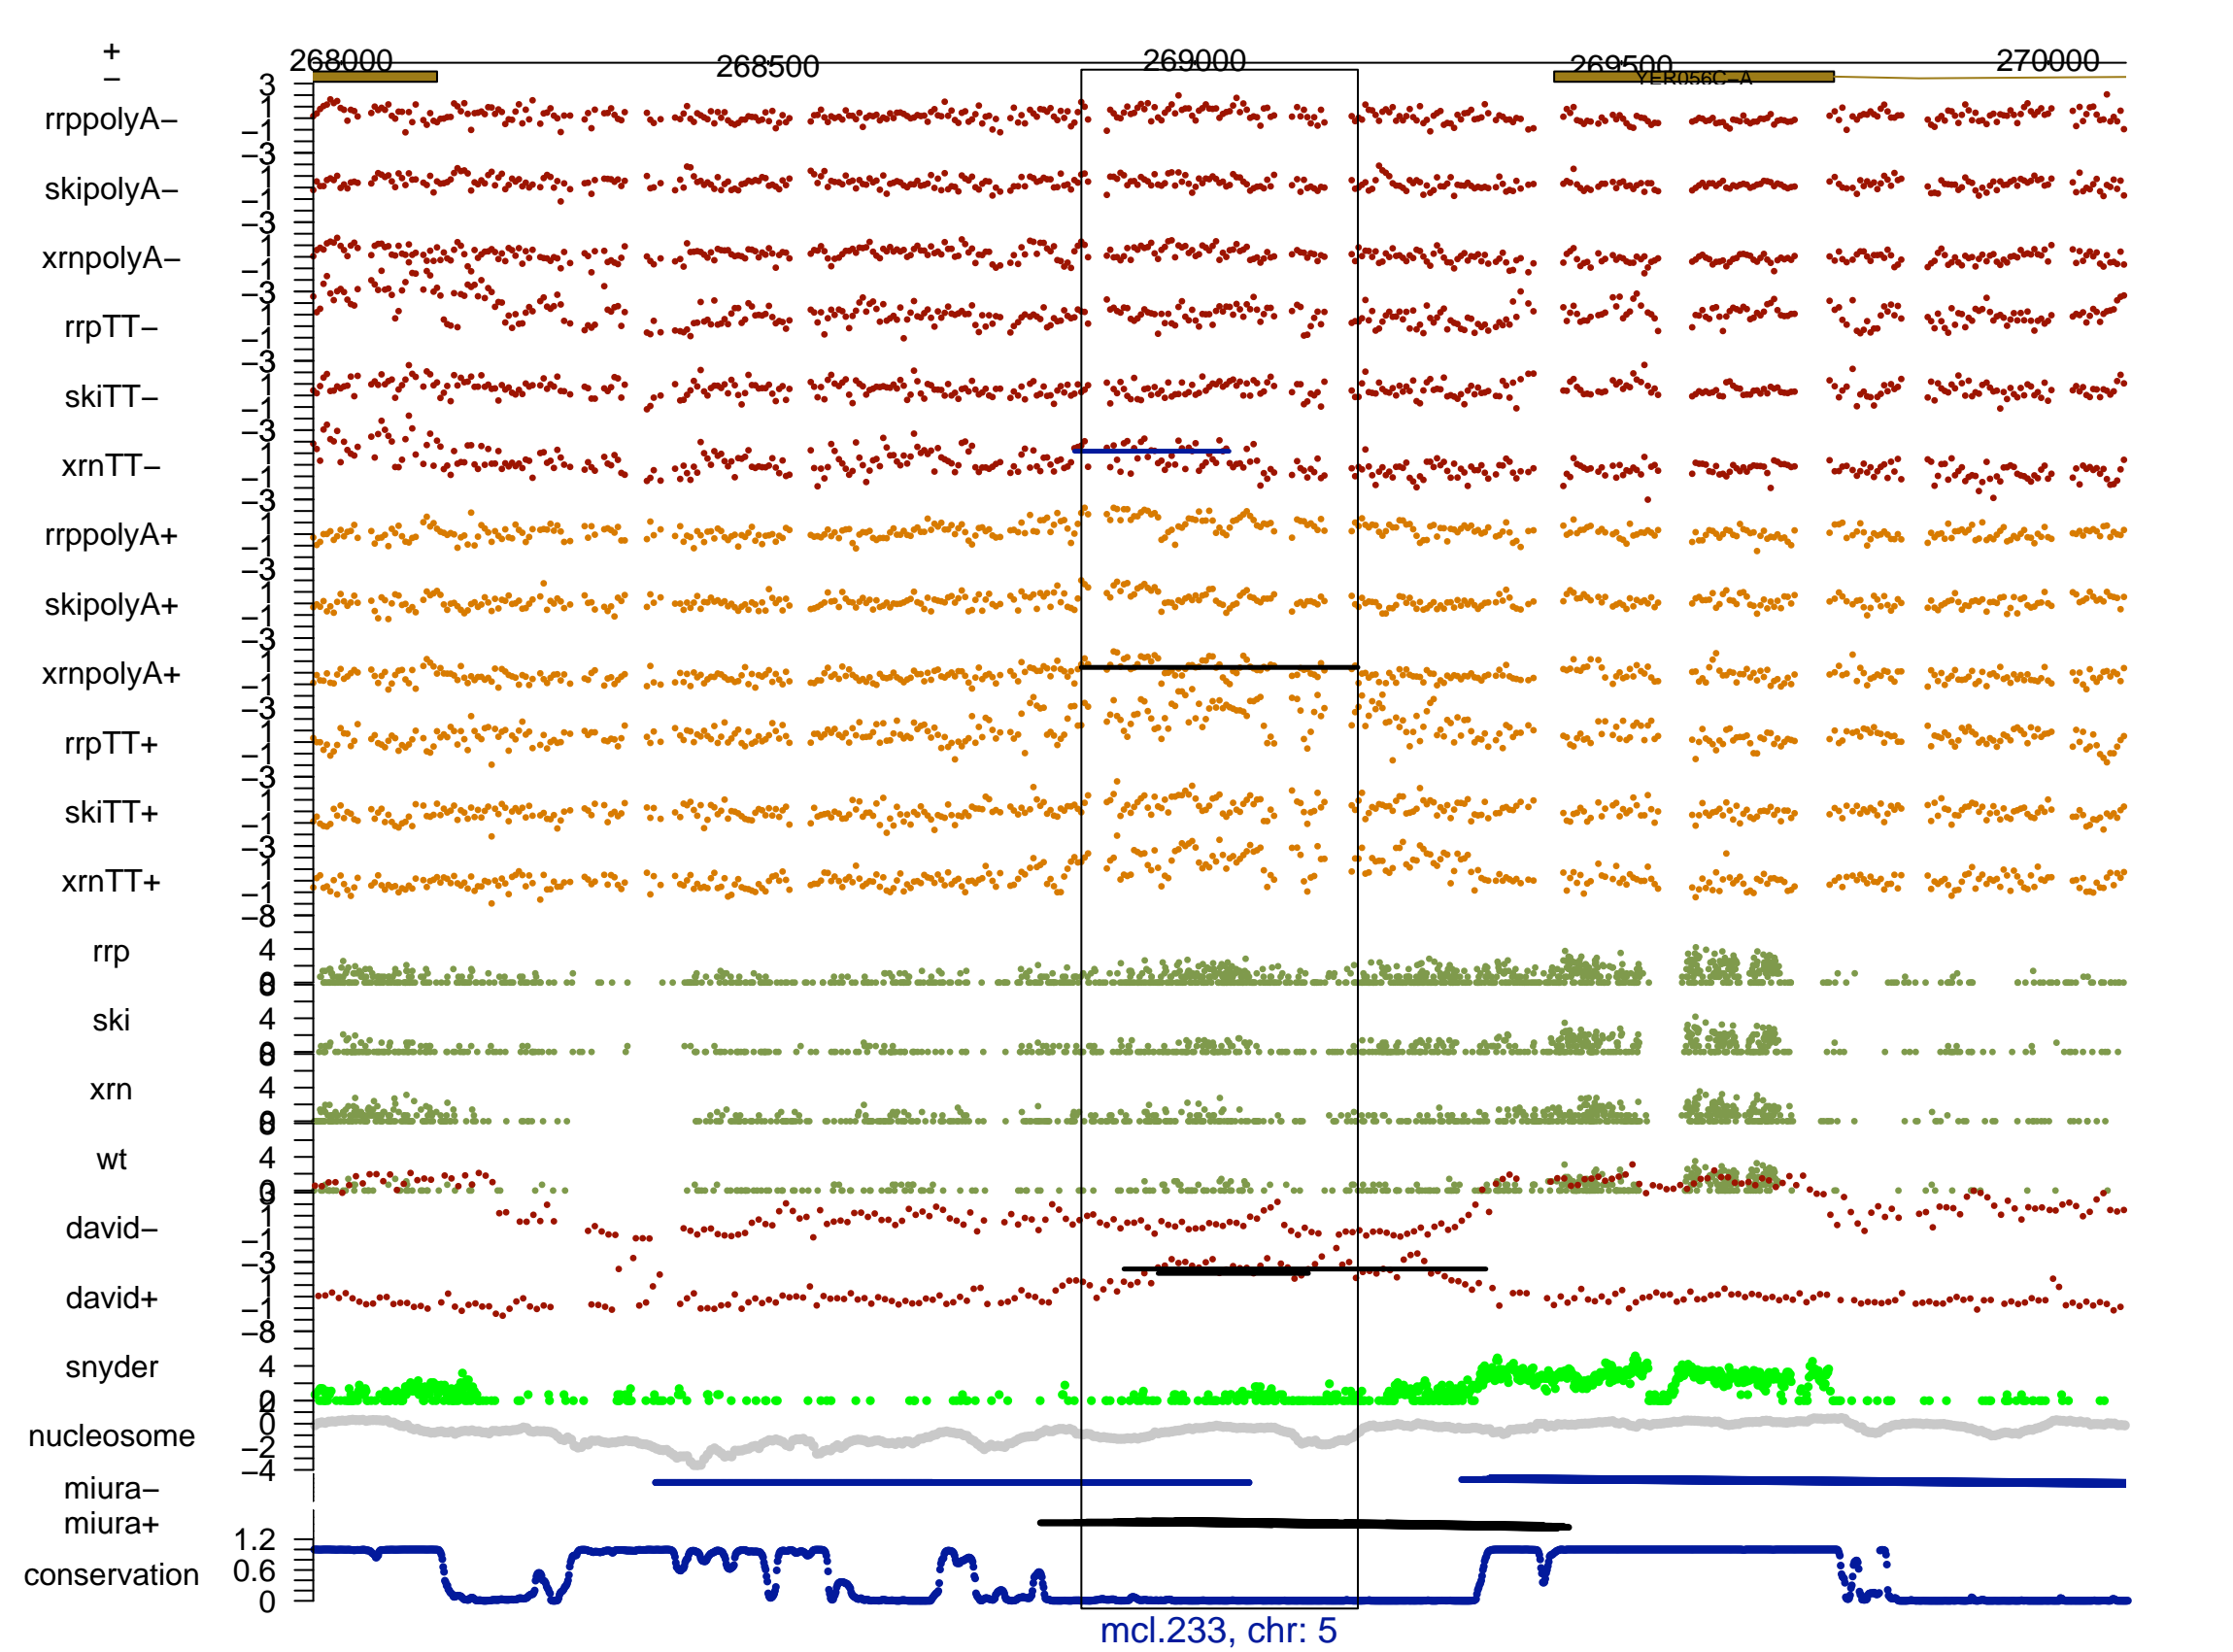

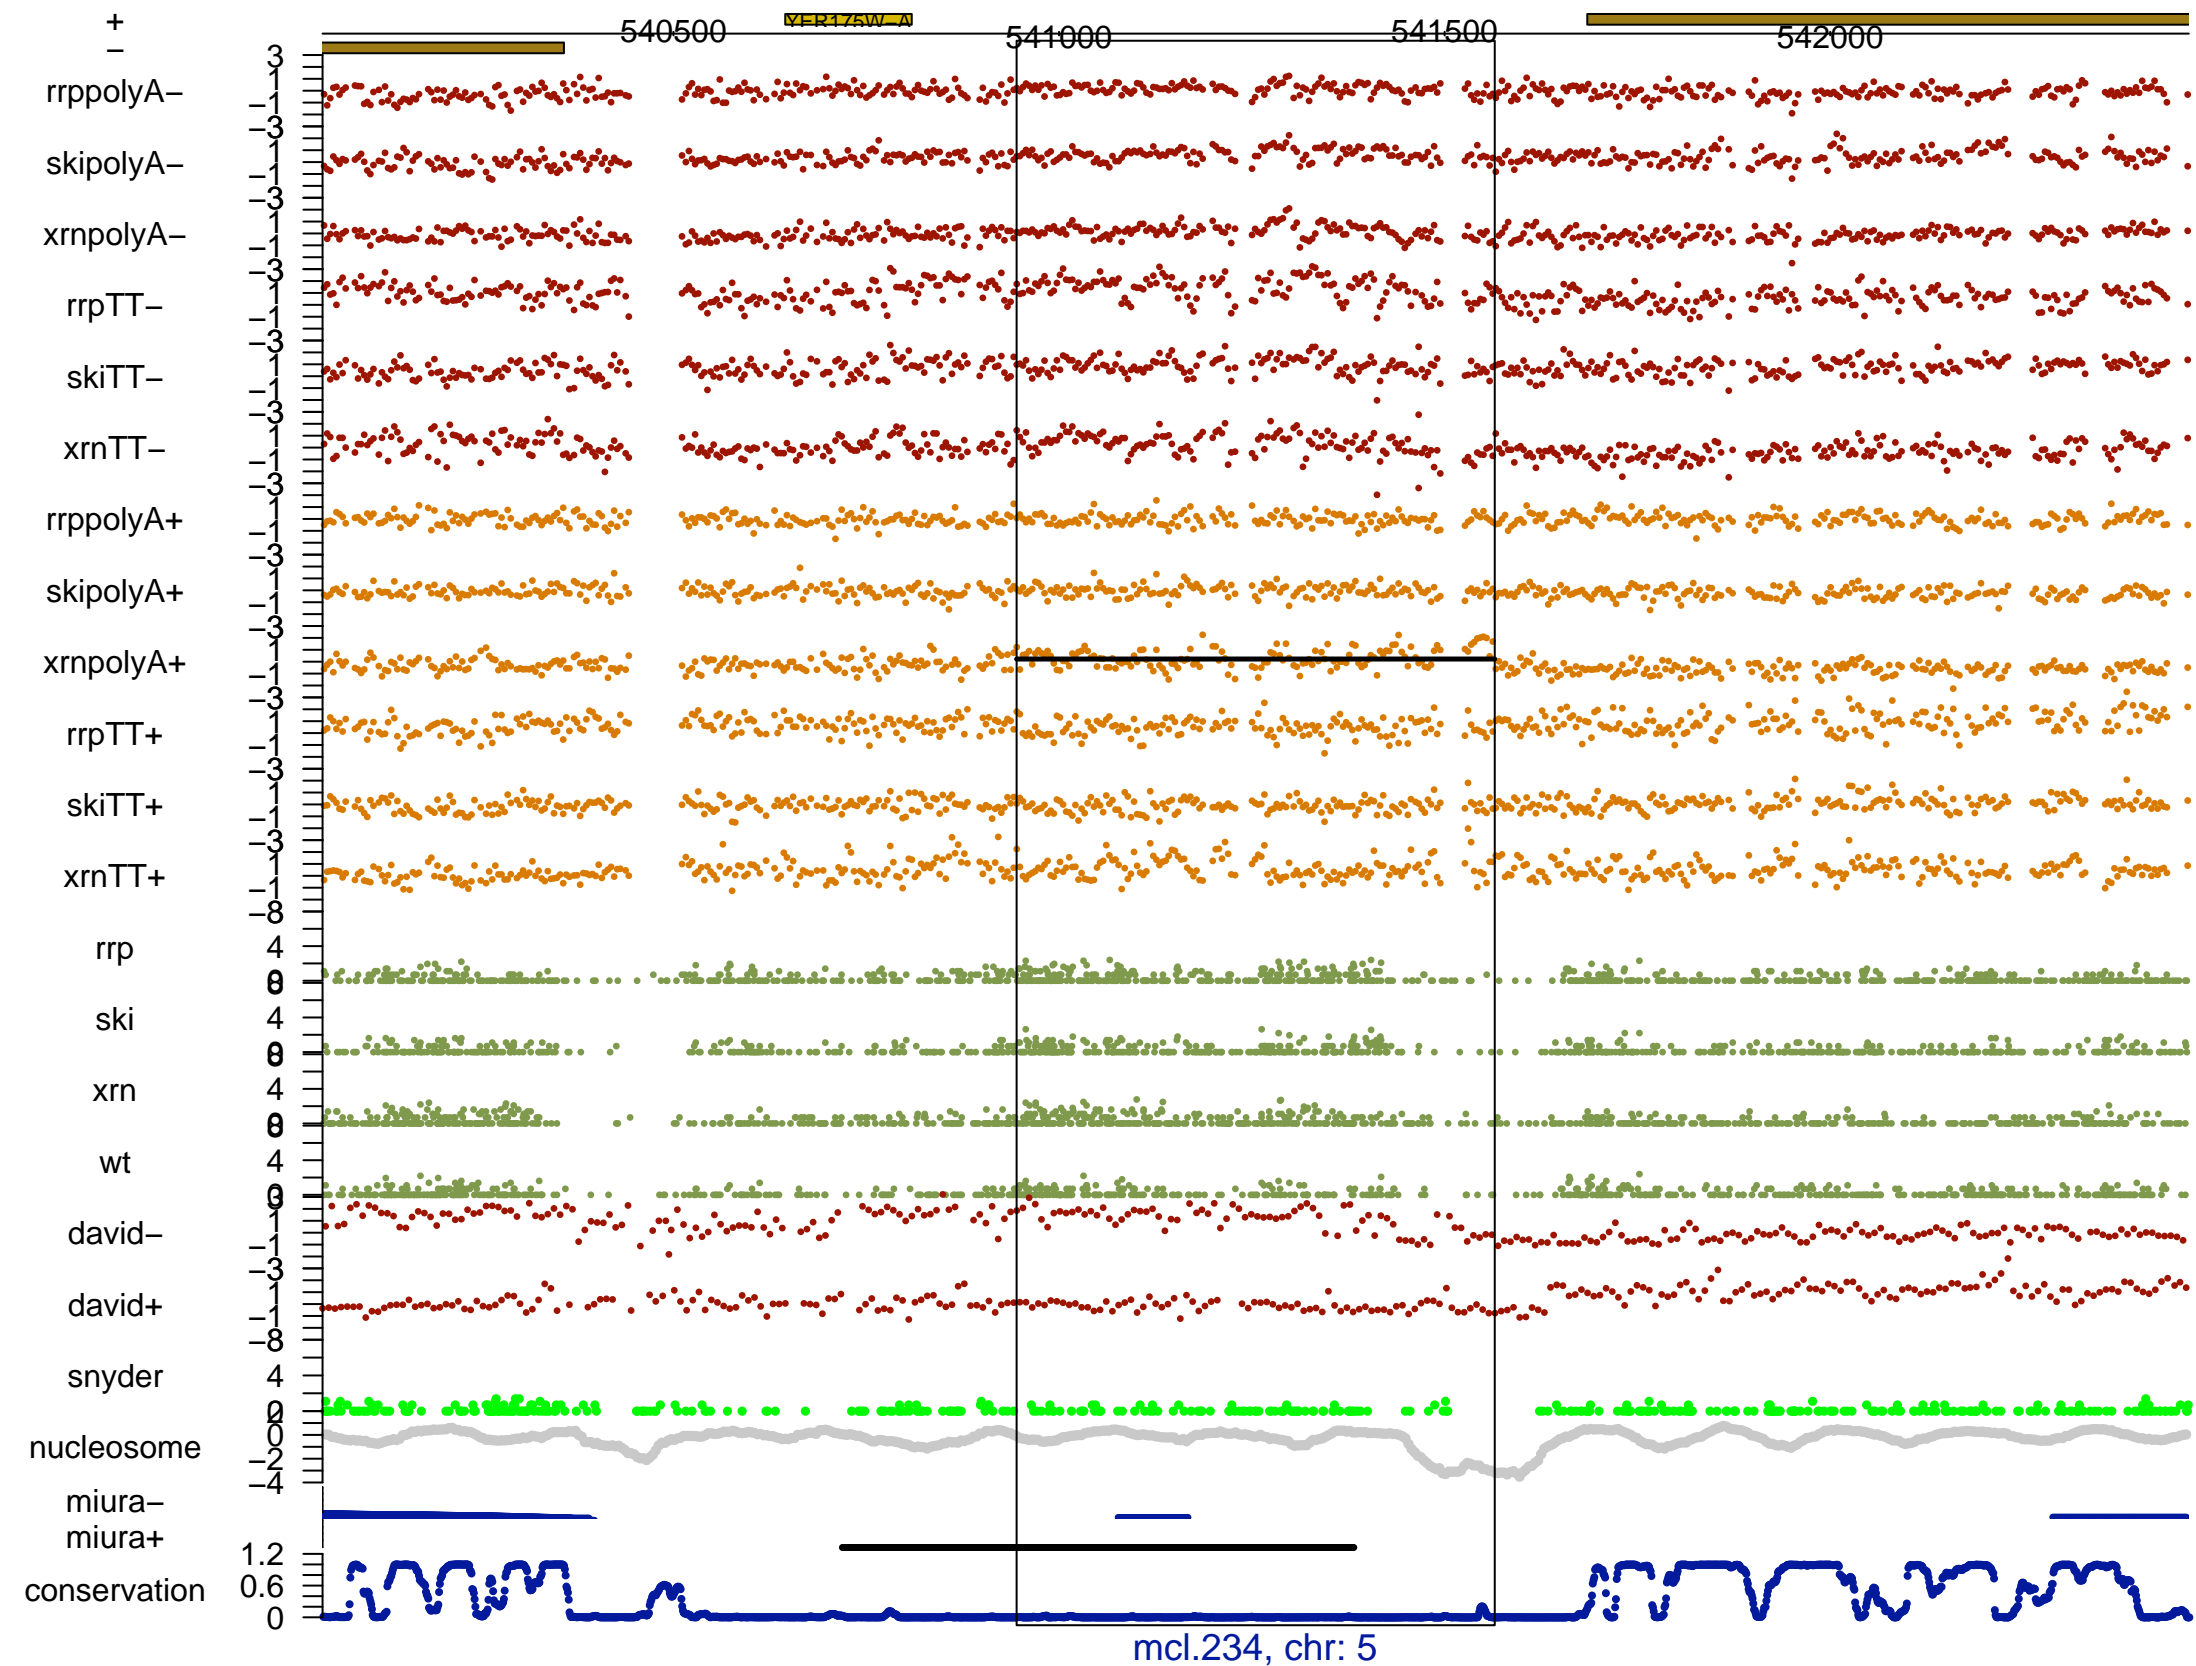

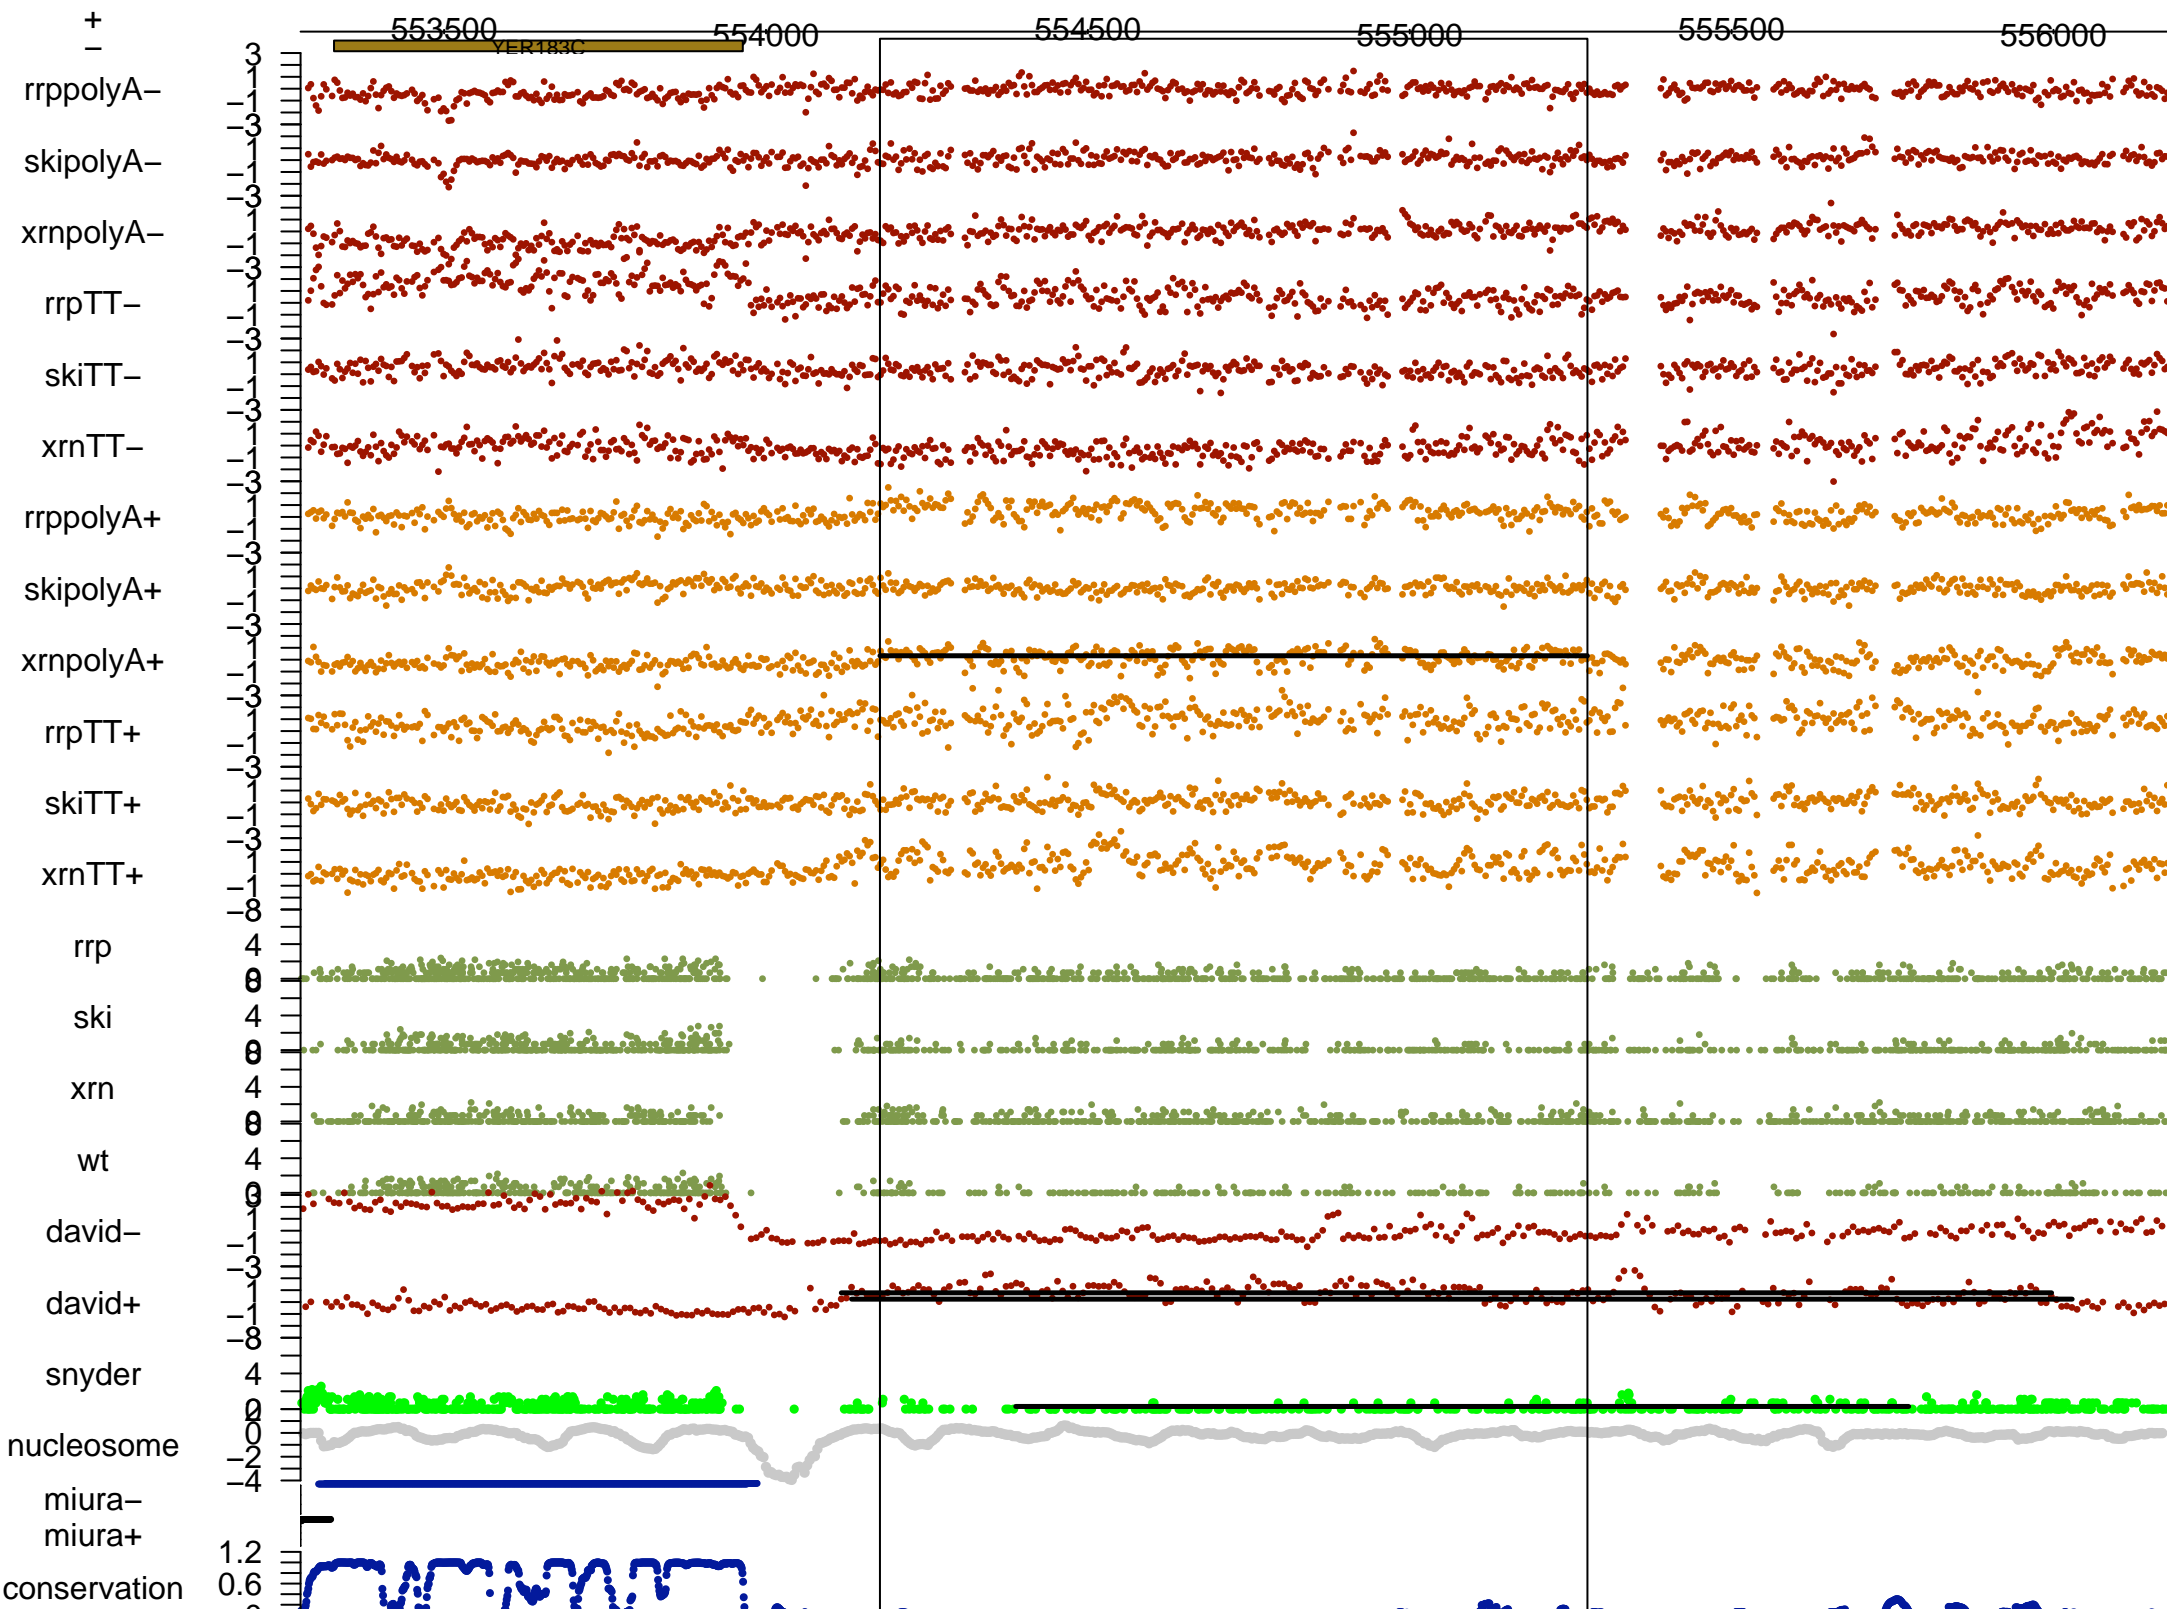

mcl.235, chr: 5

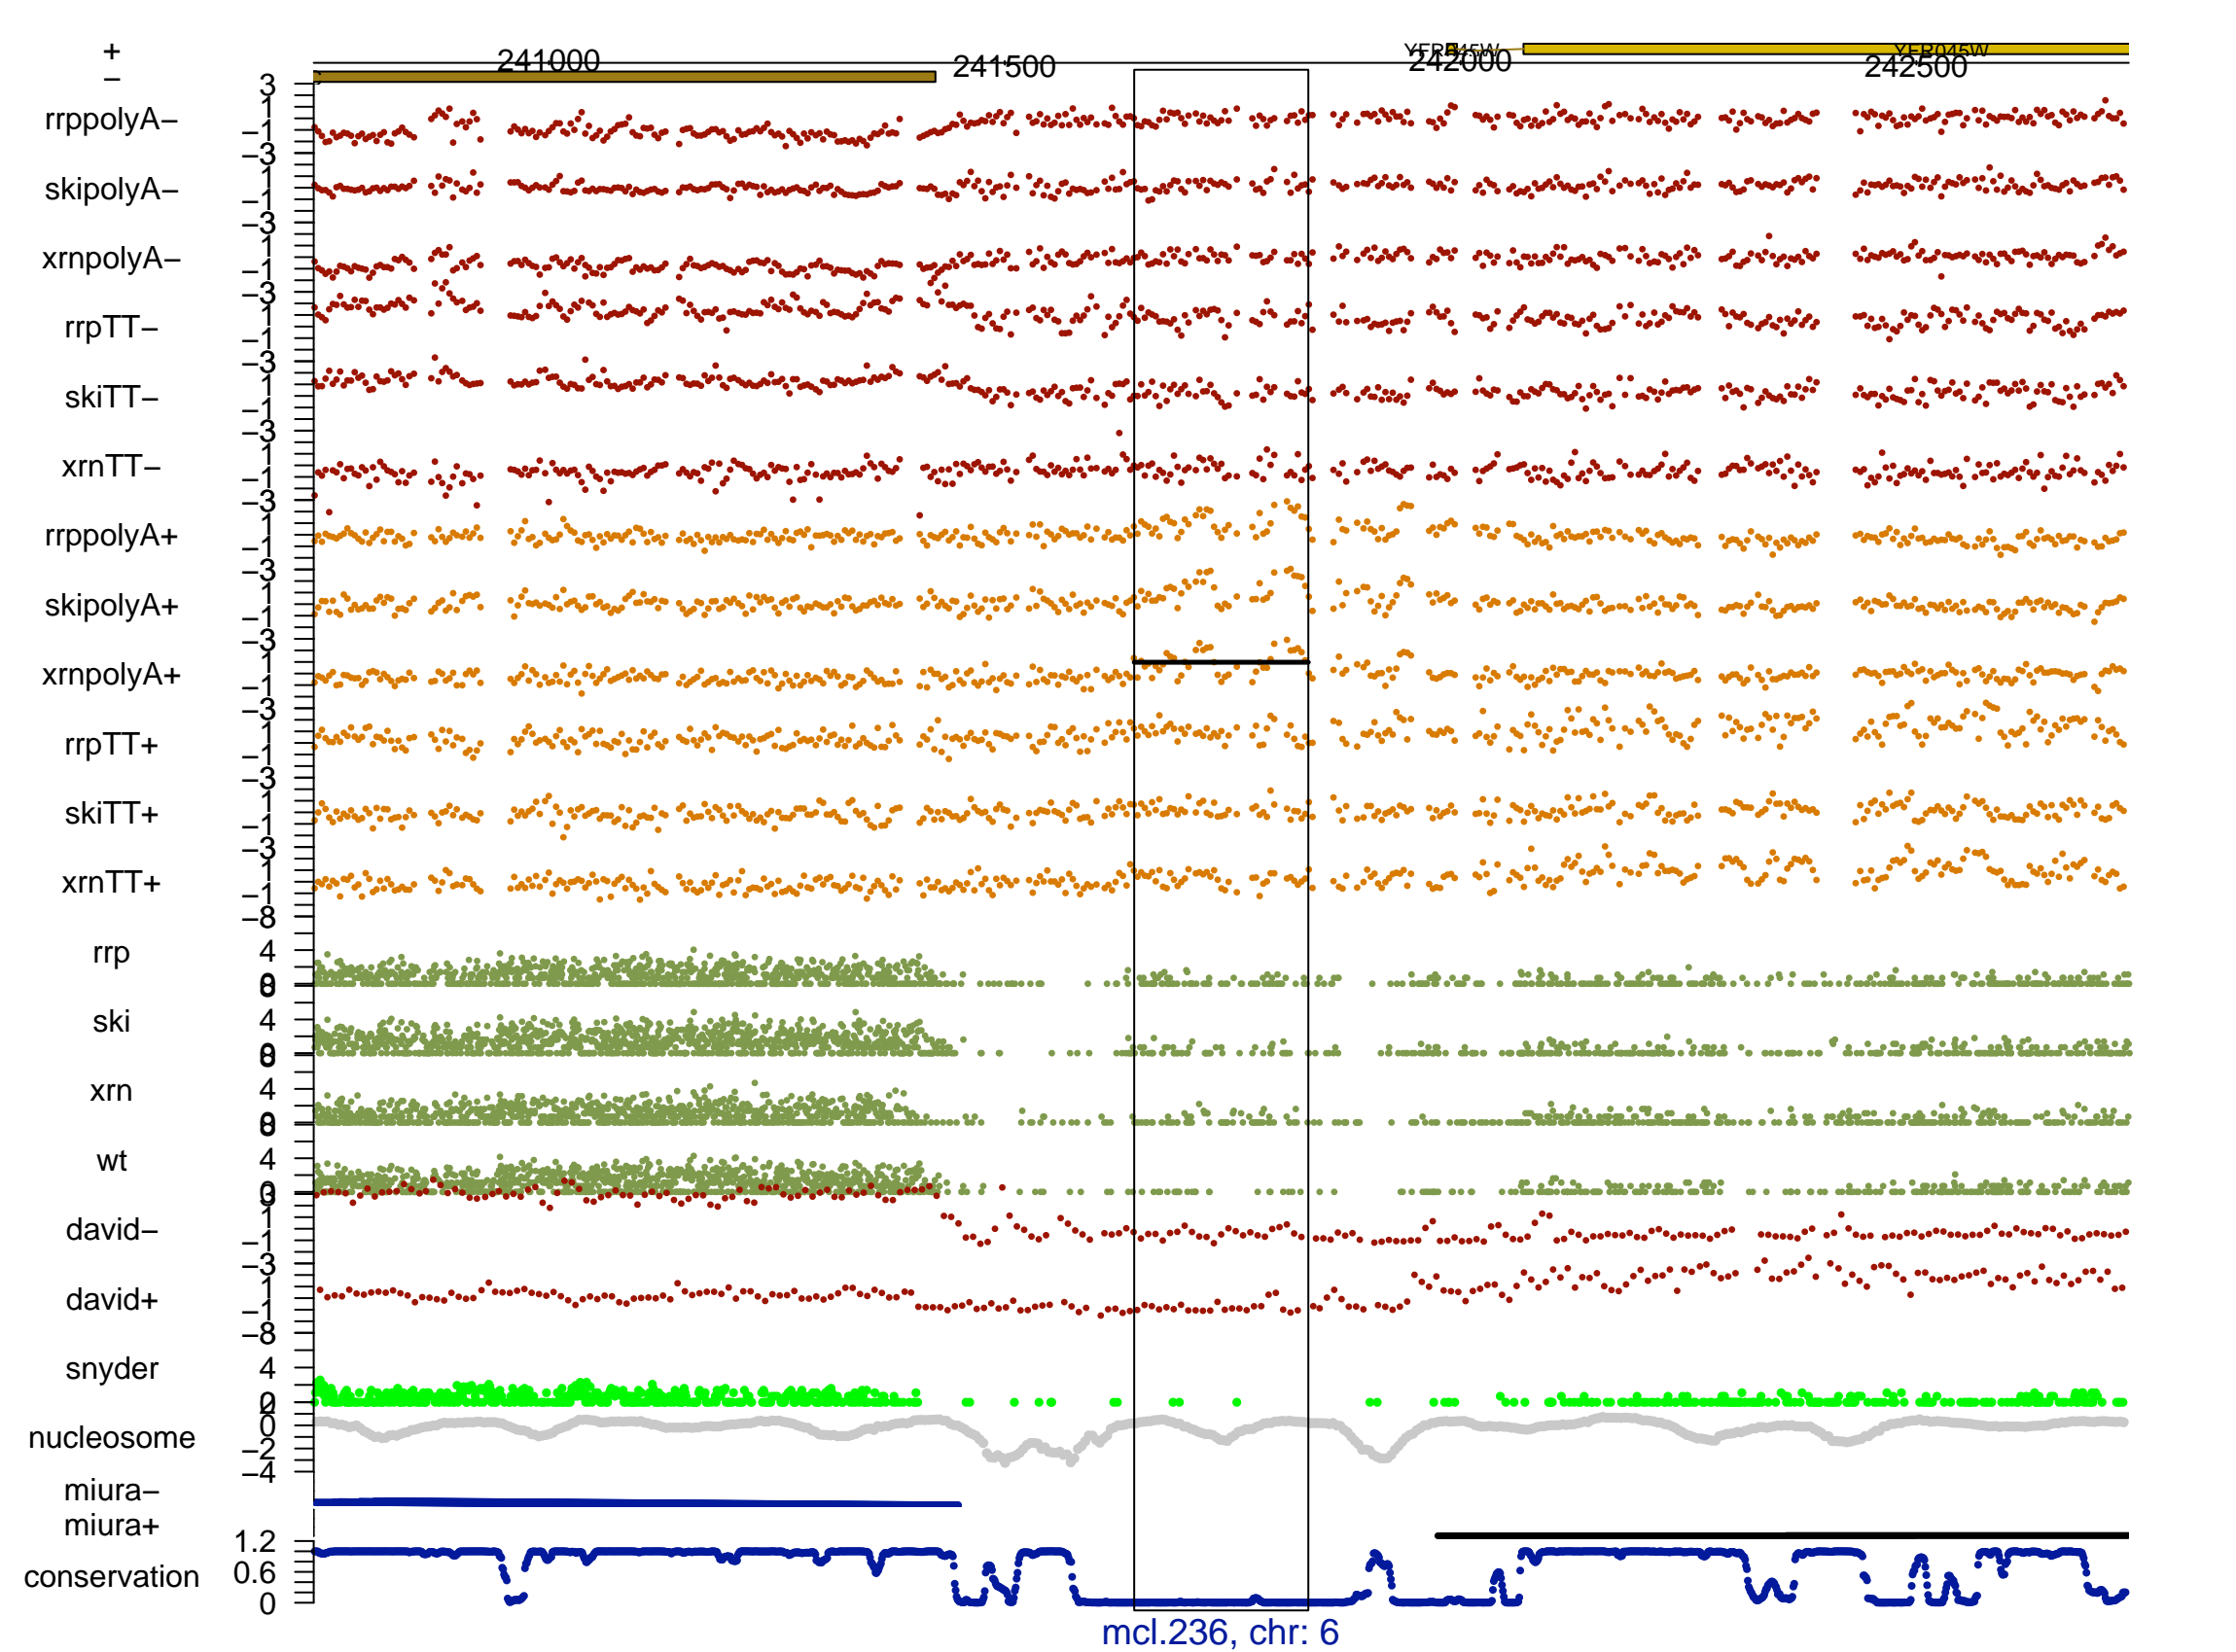



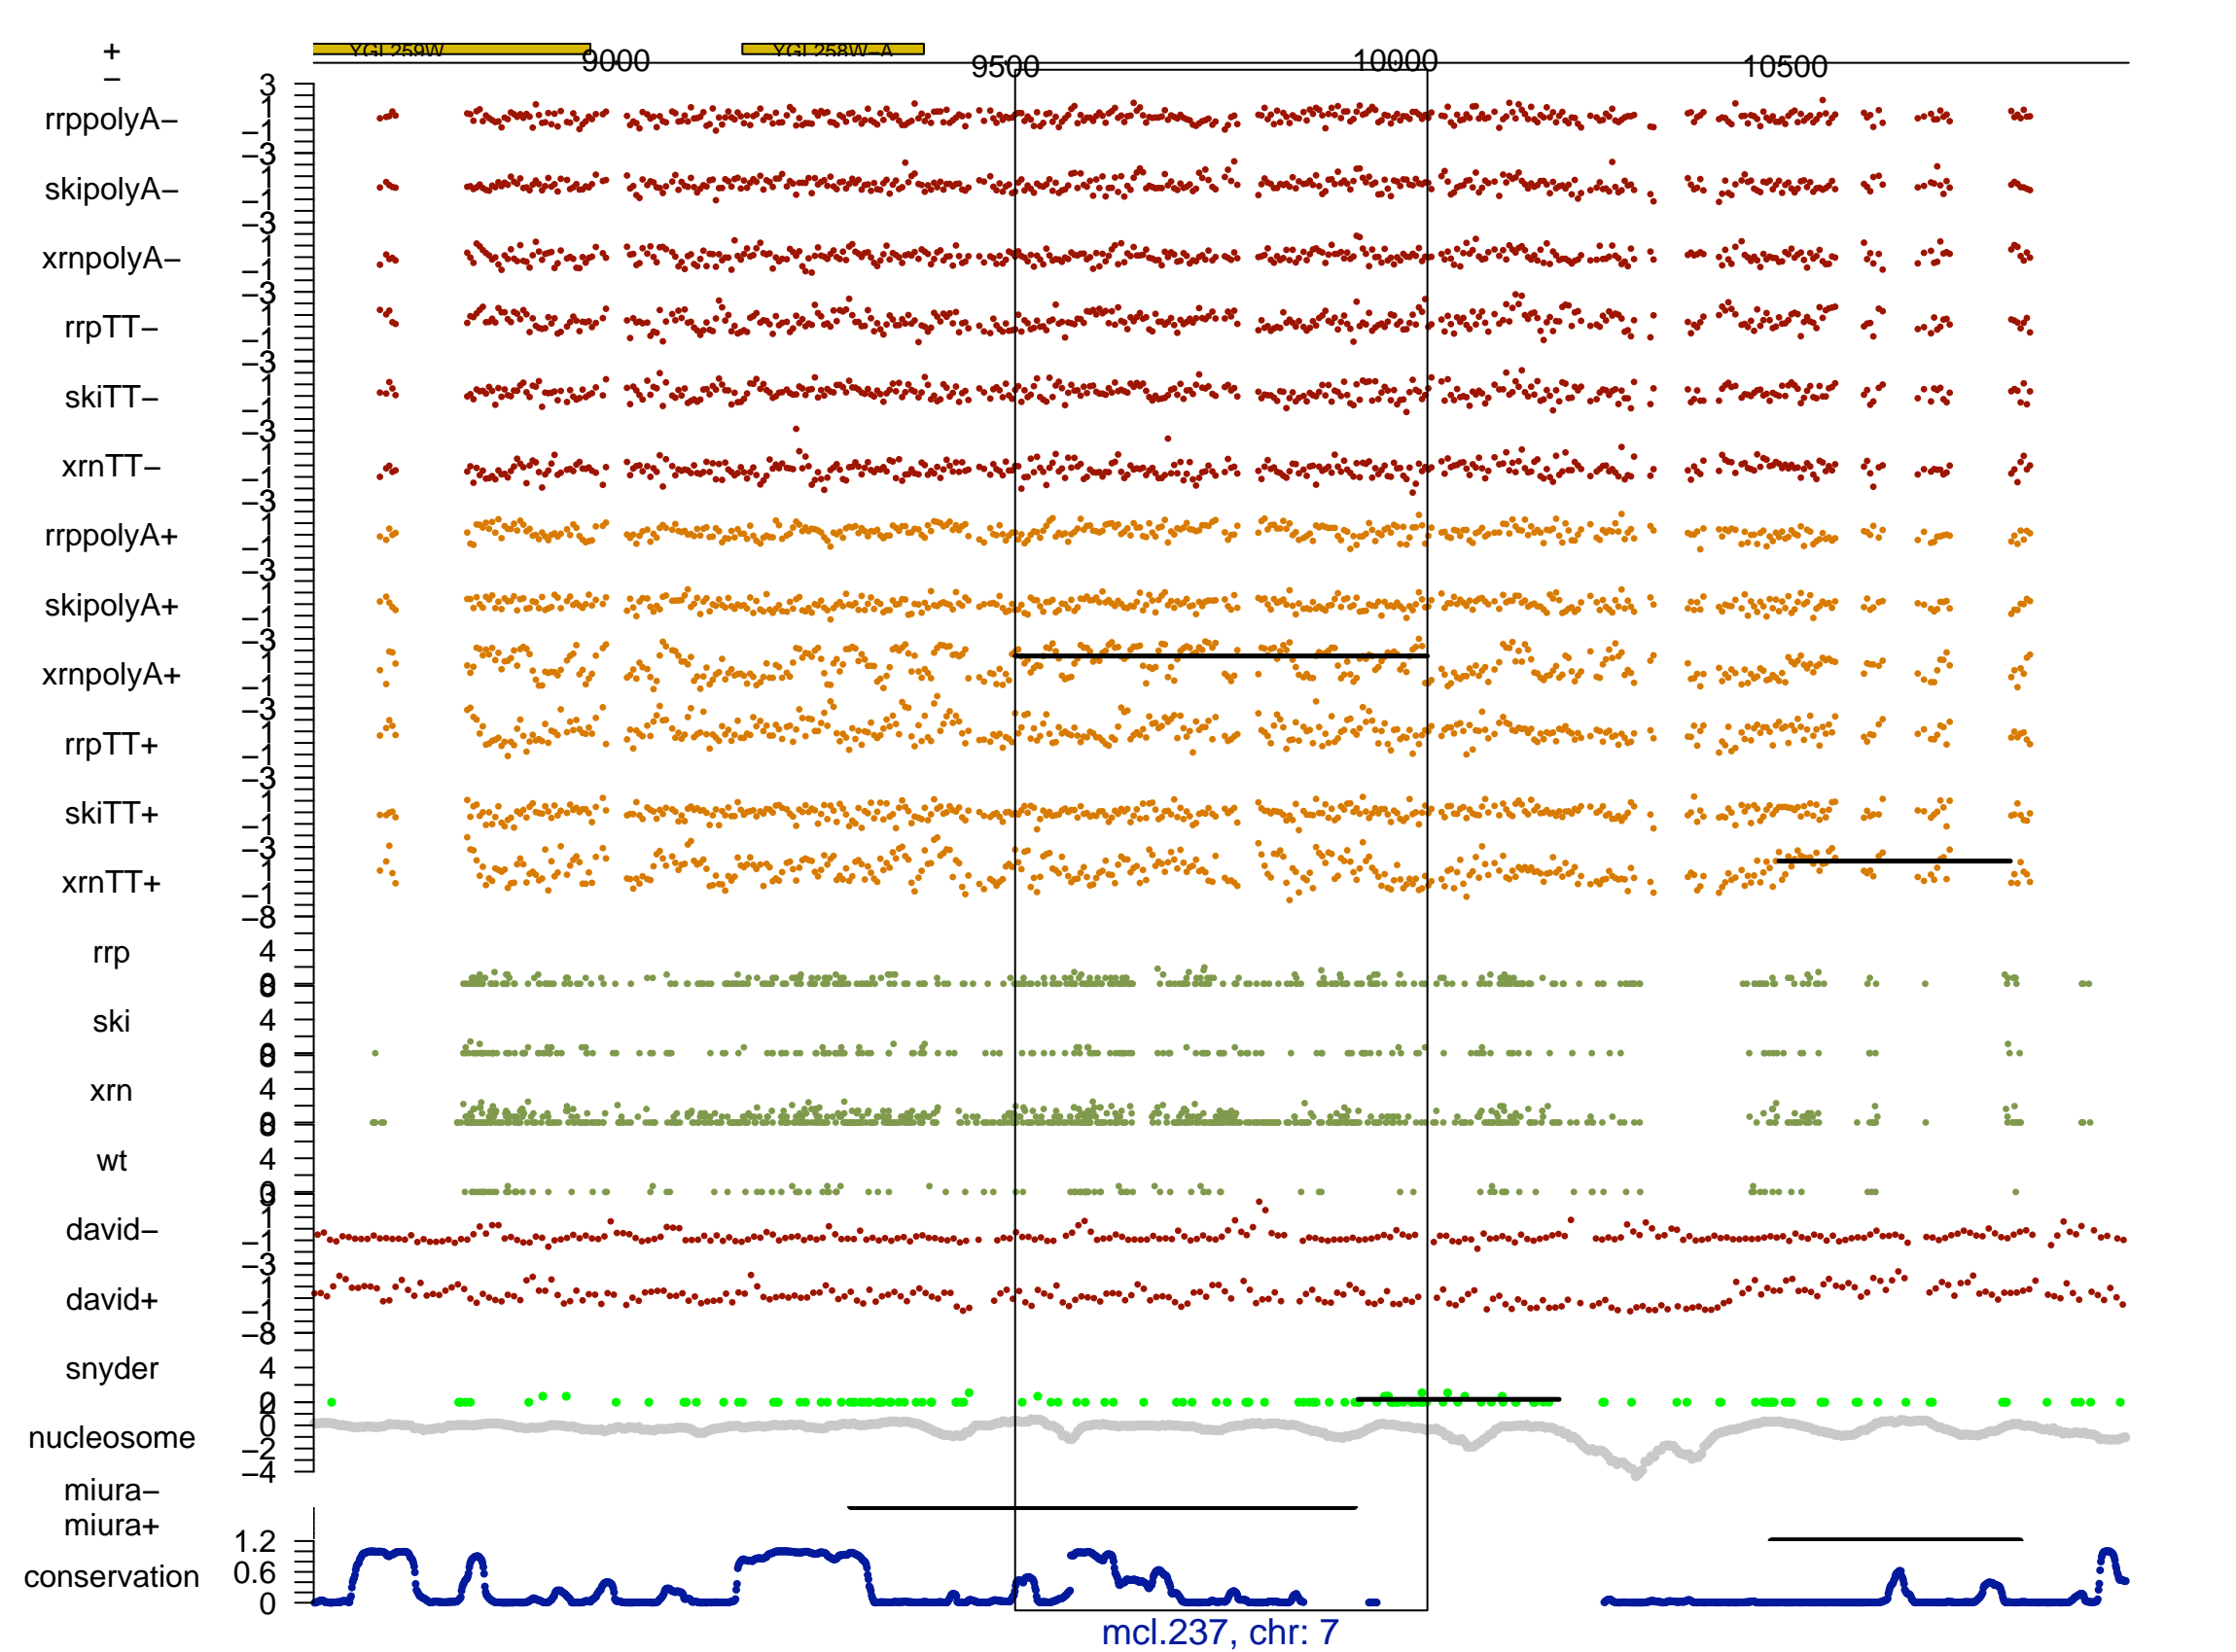

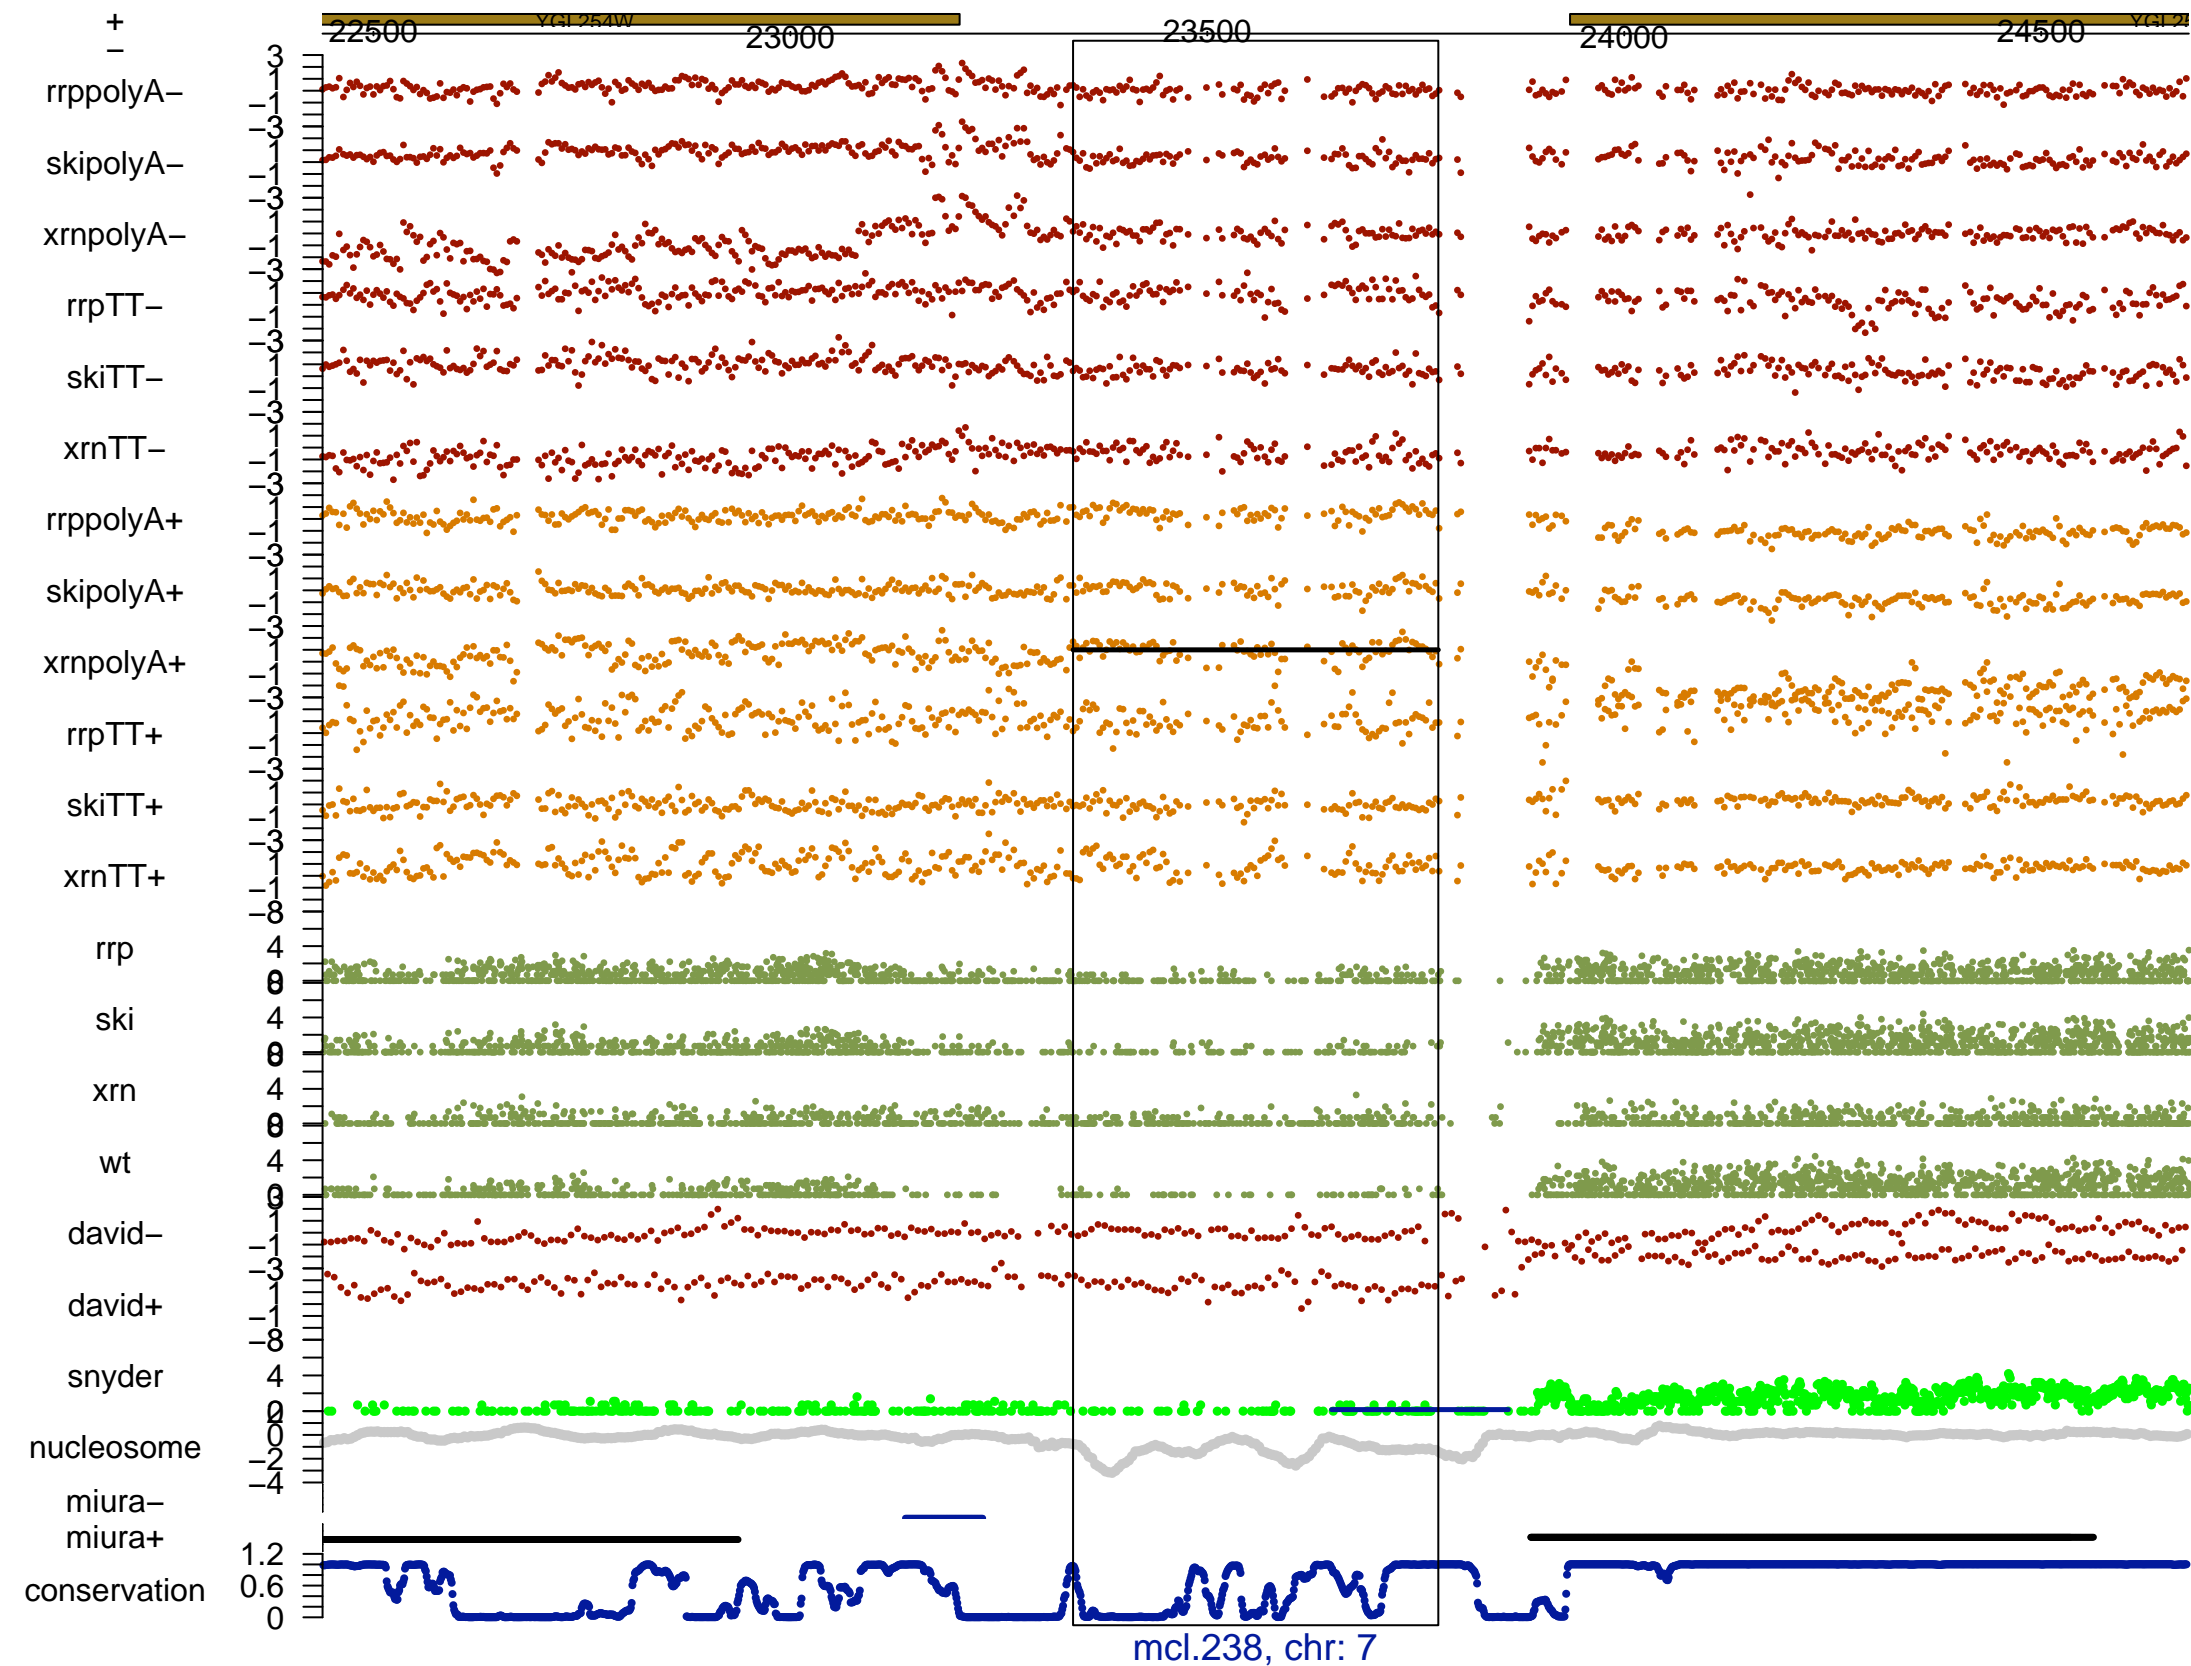

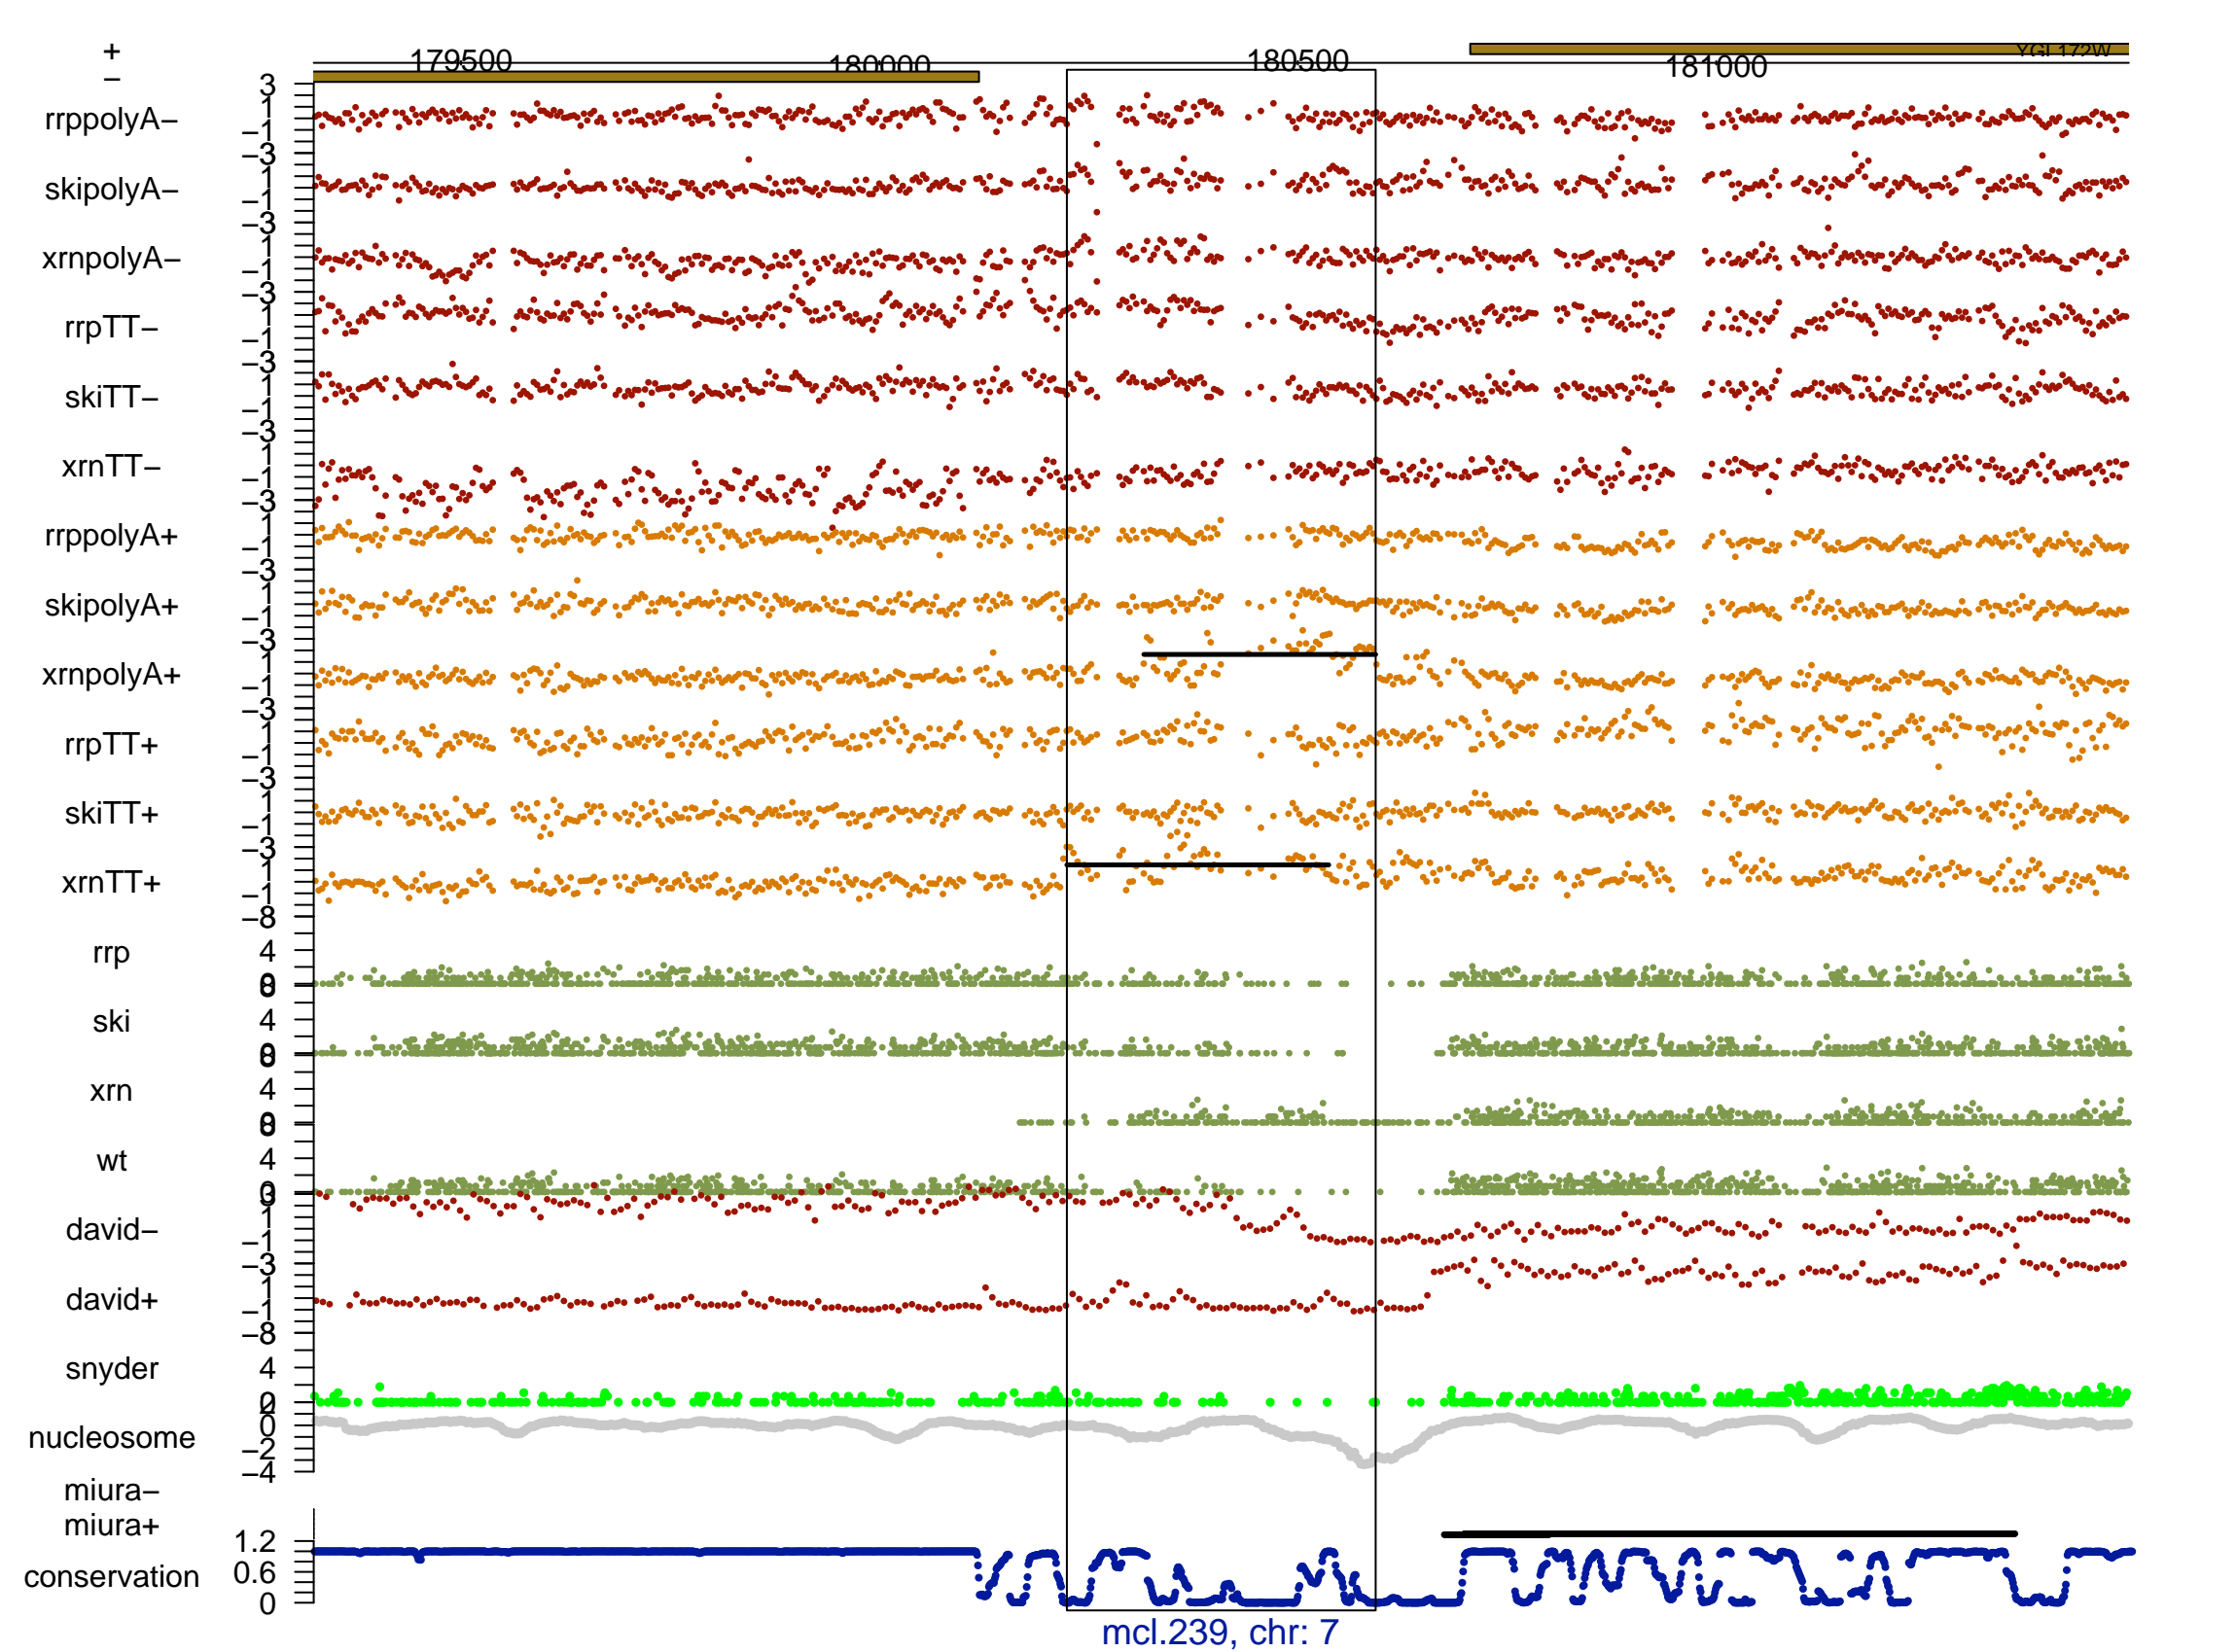





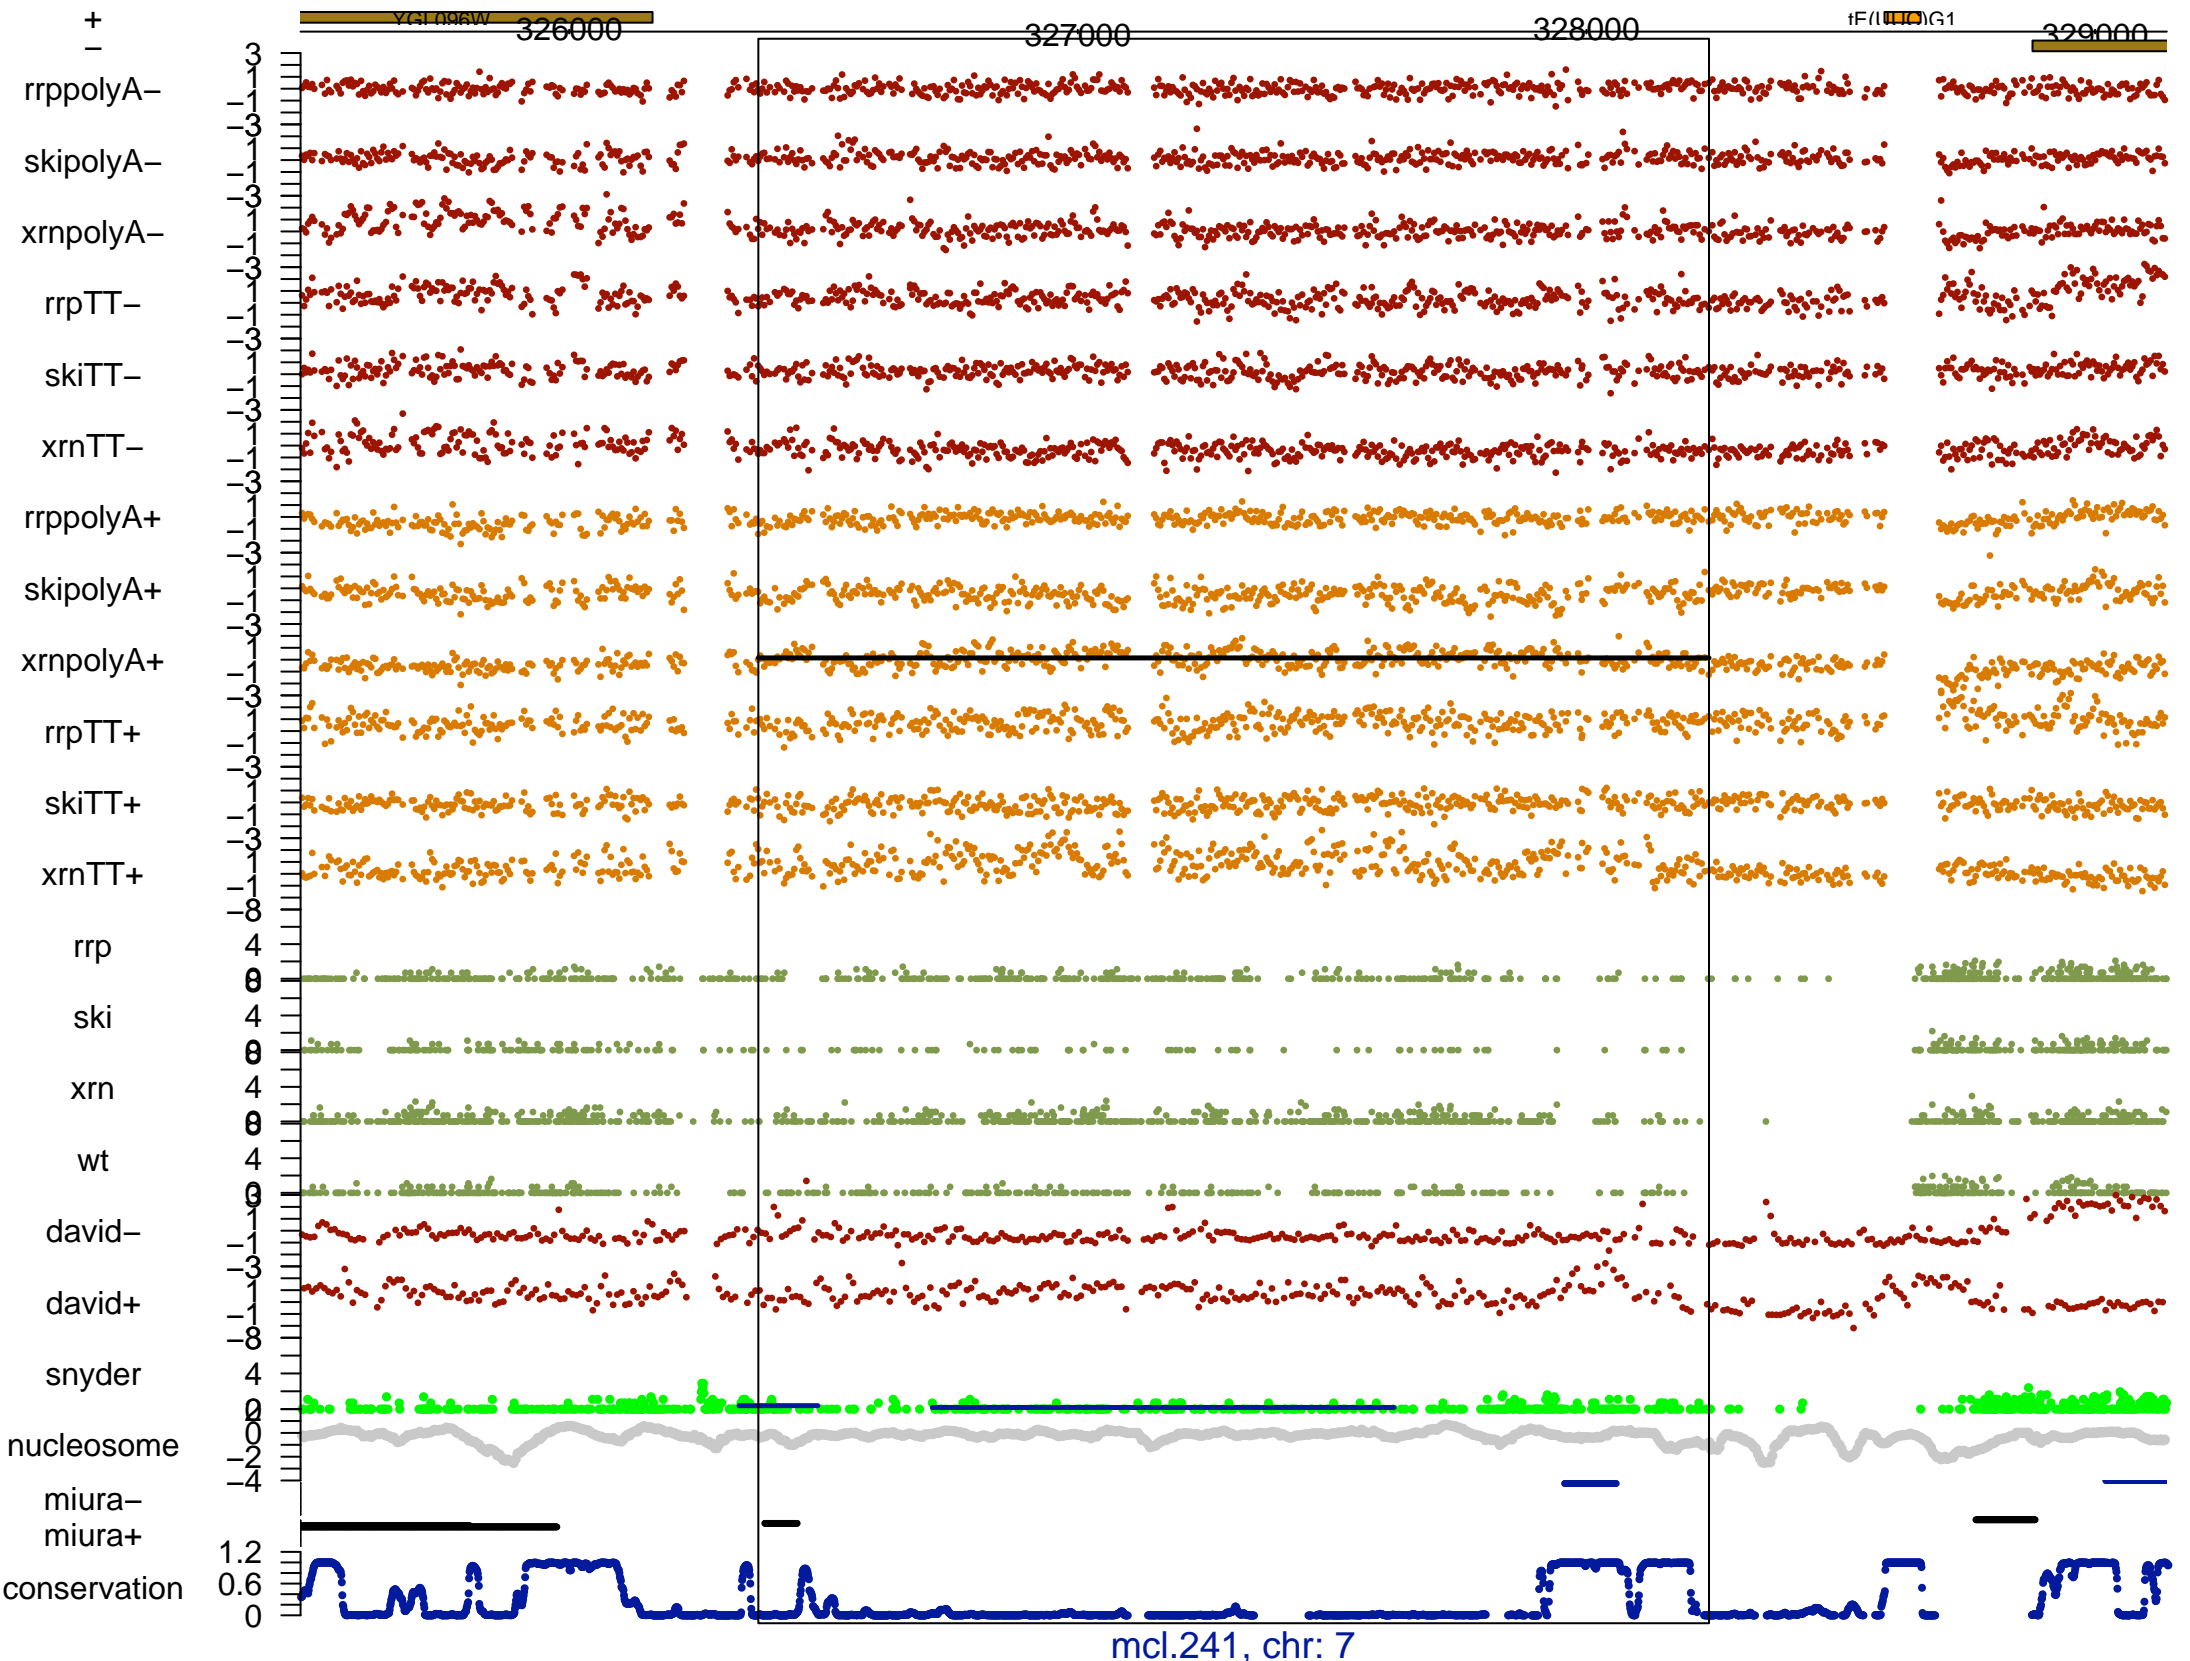















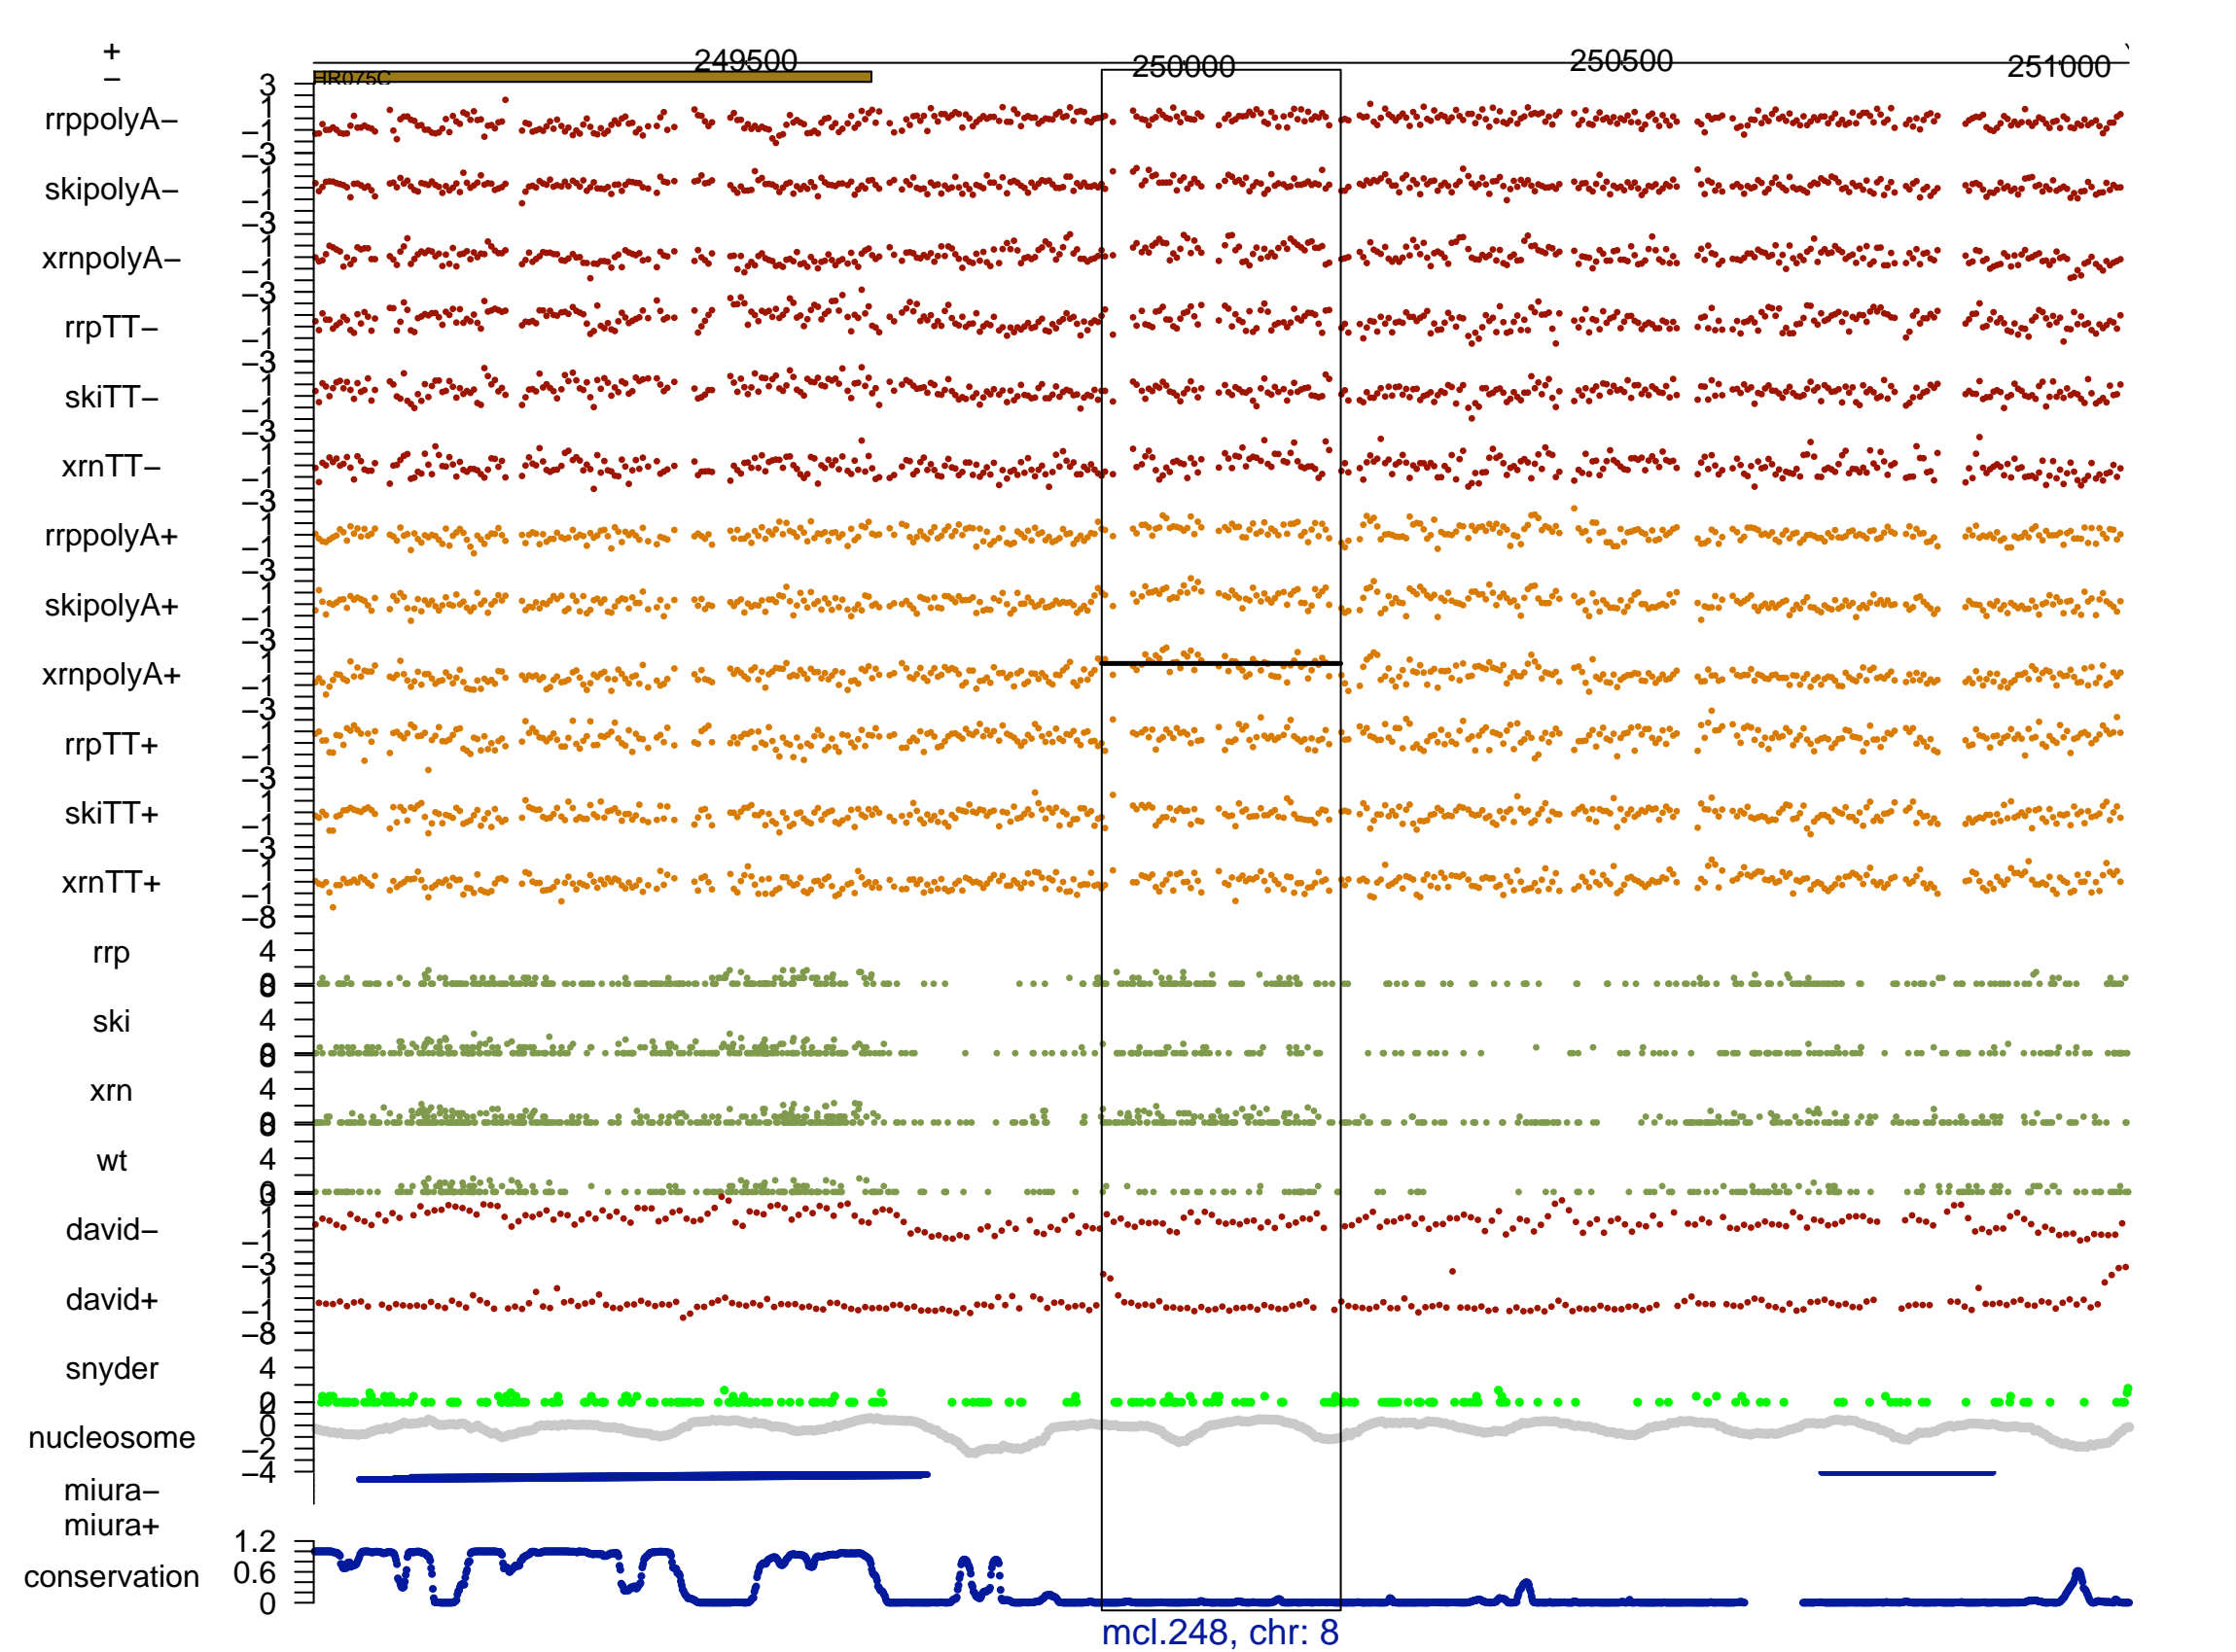



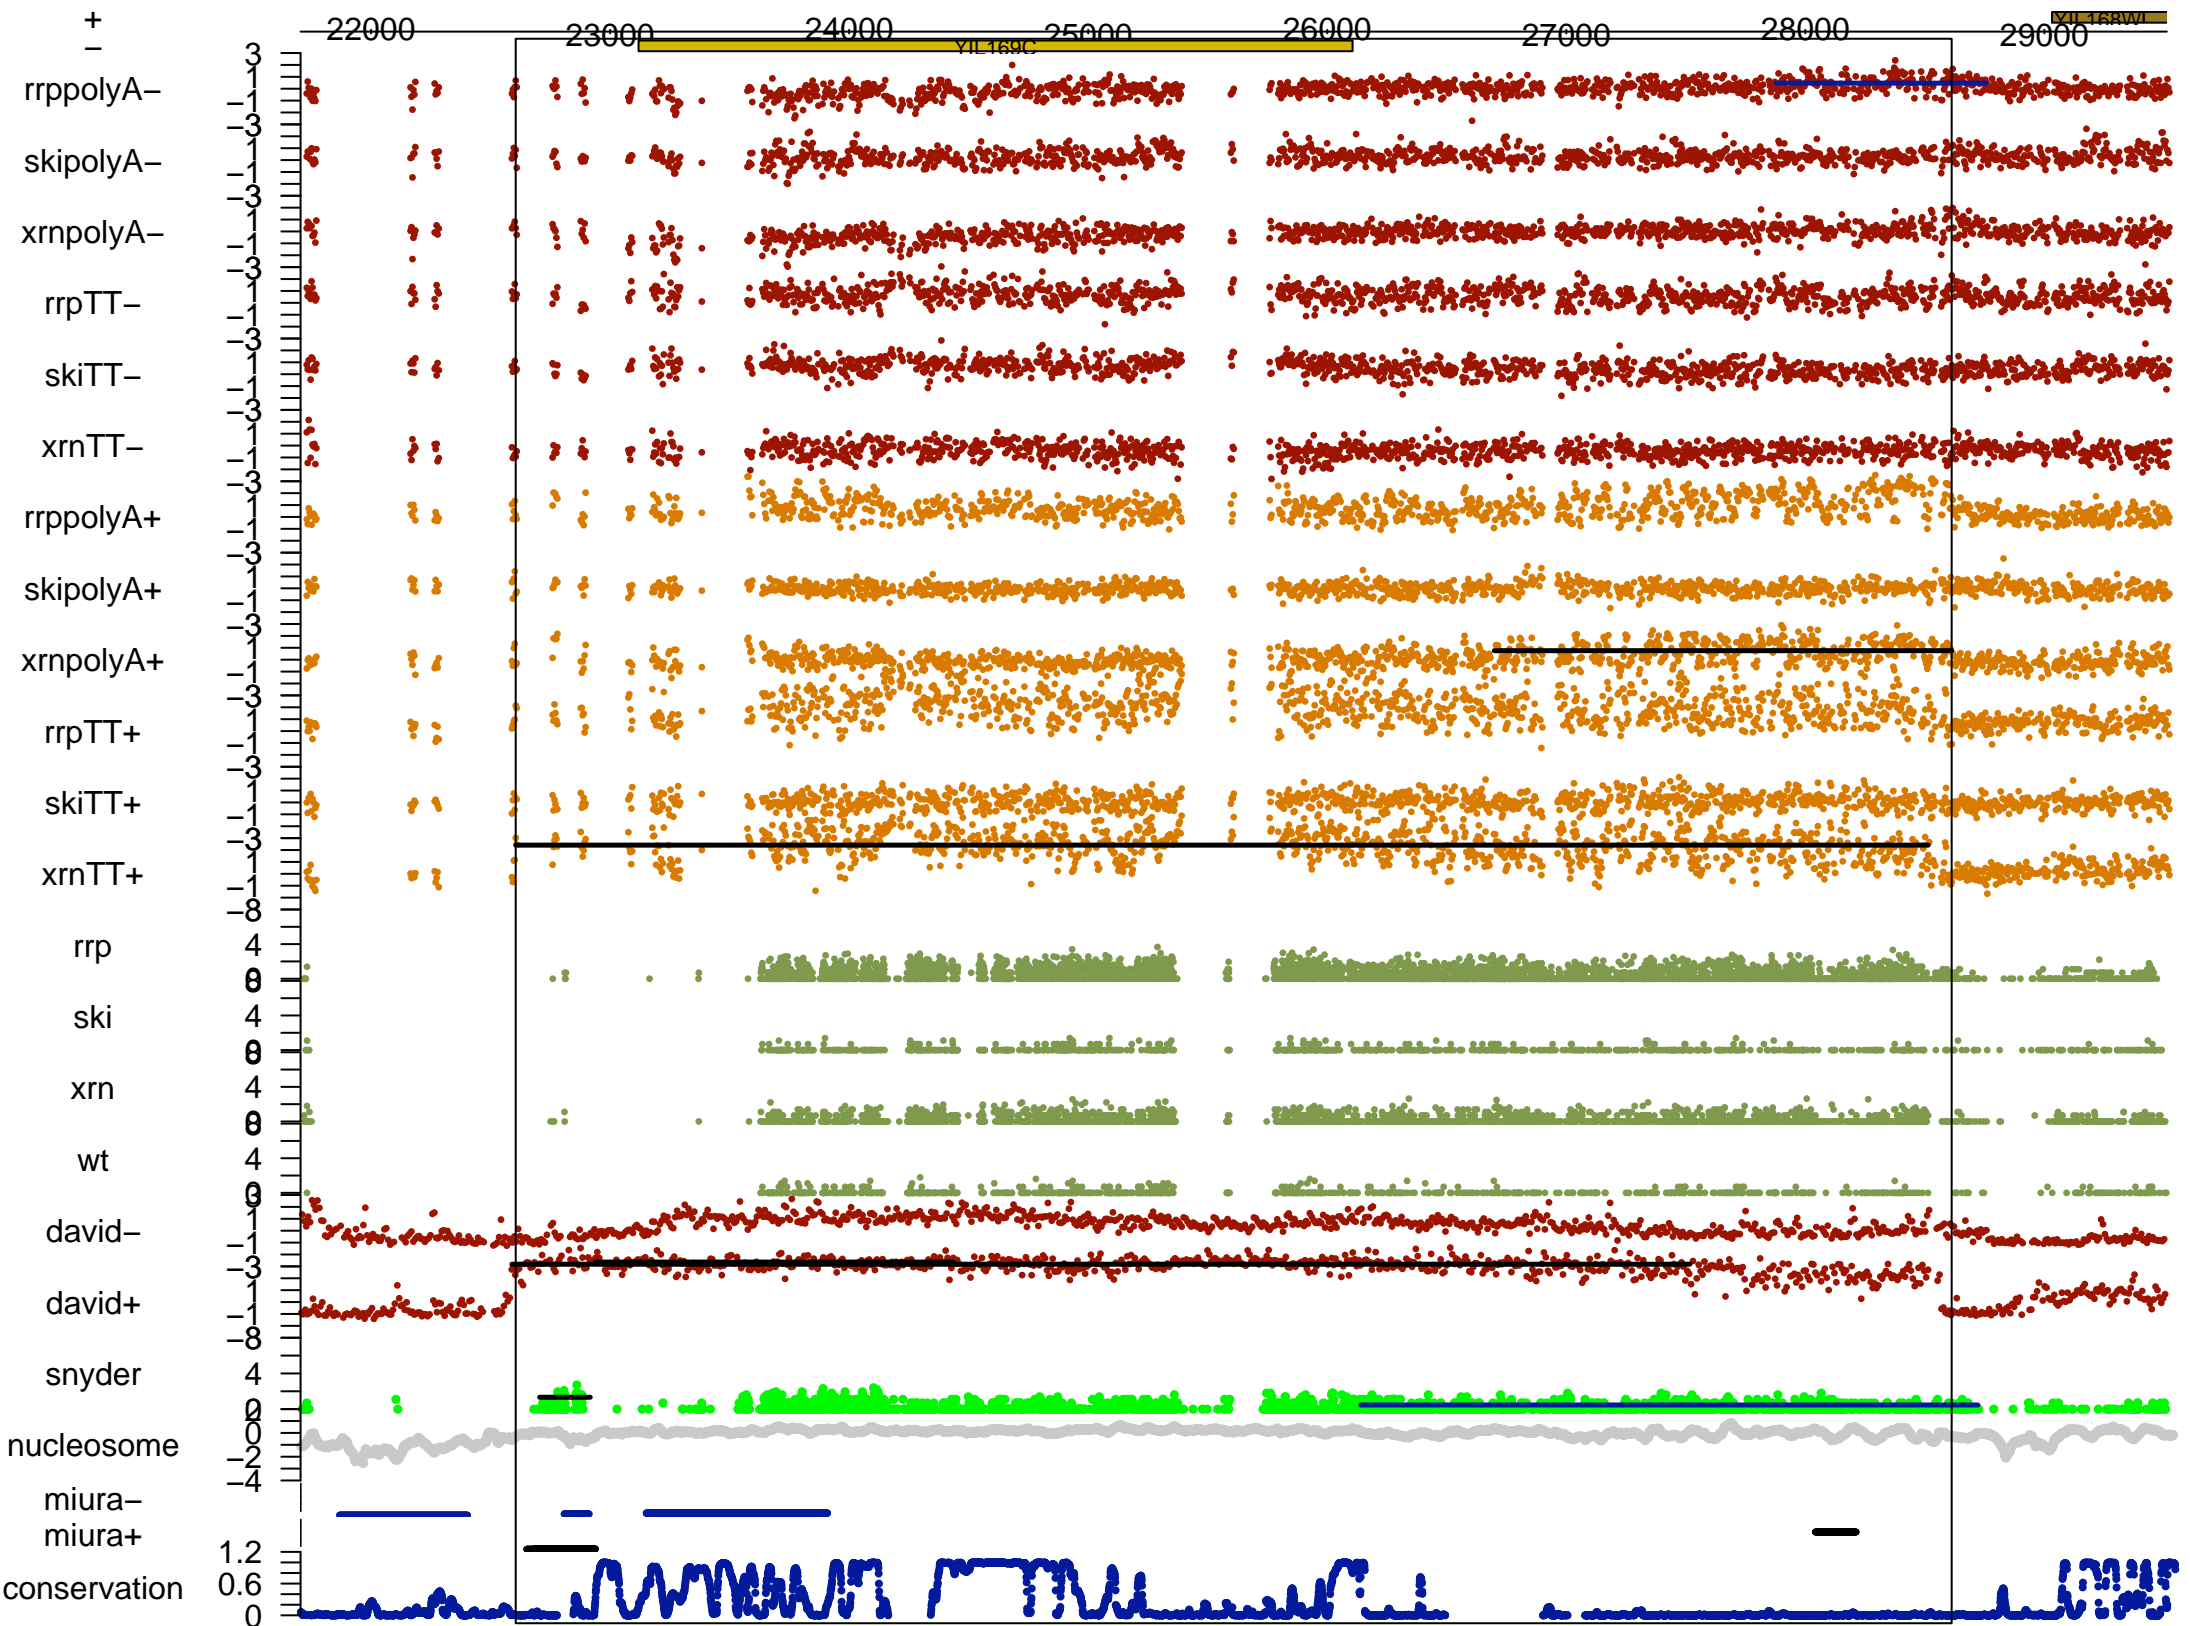

mcl.249, chr: 9

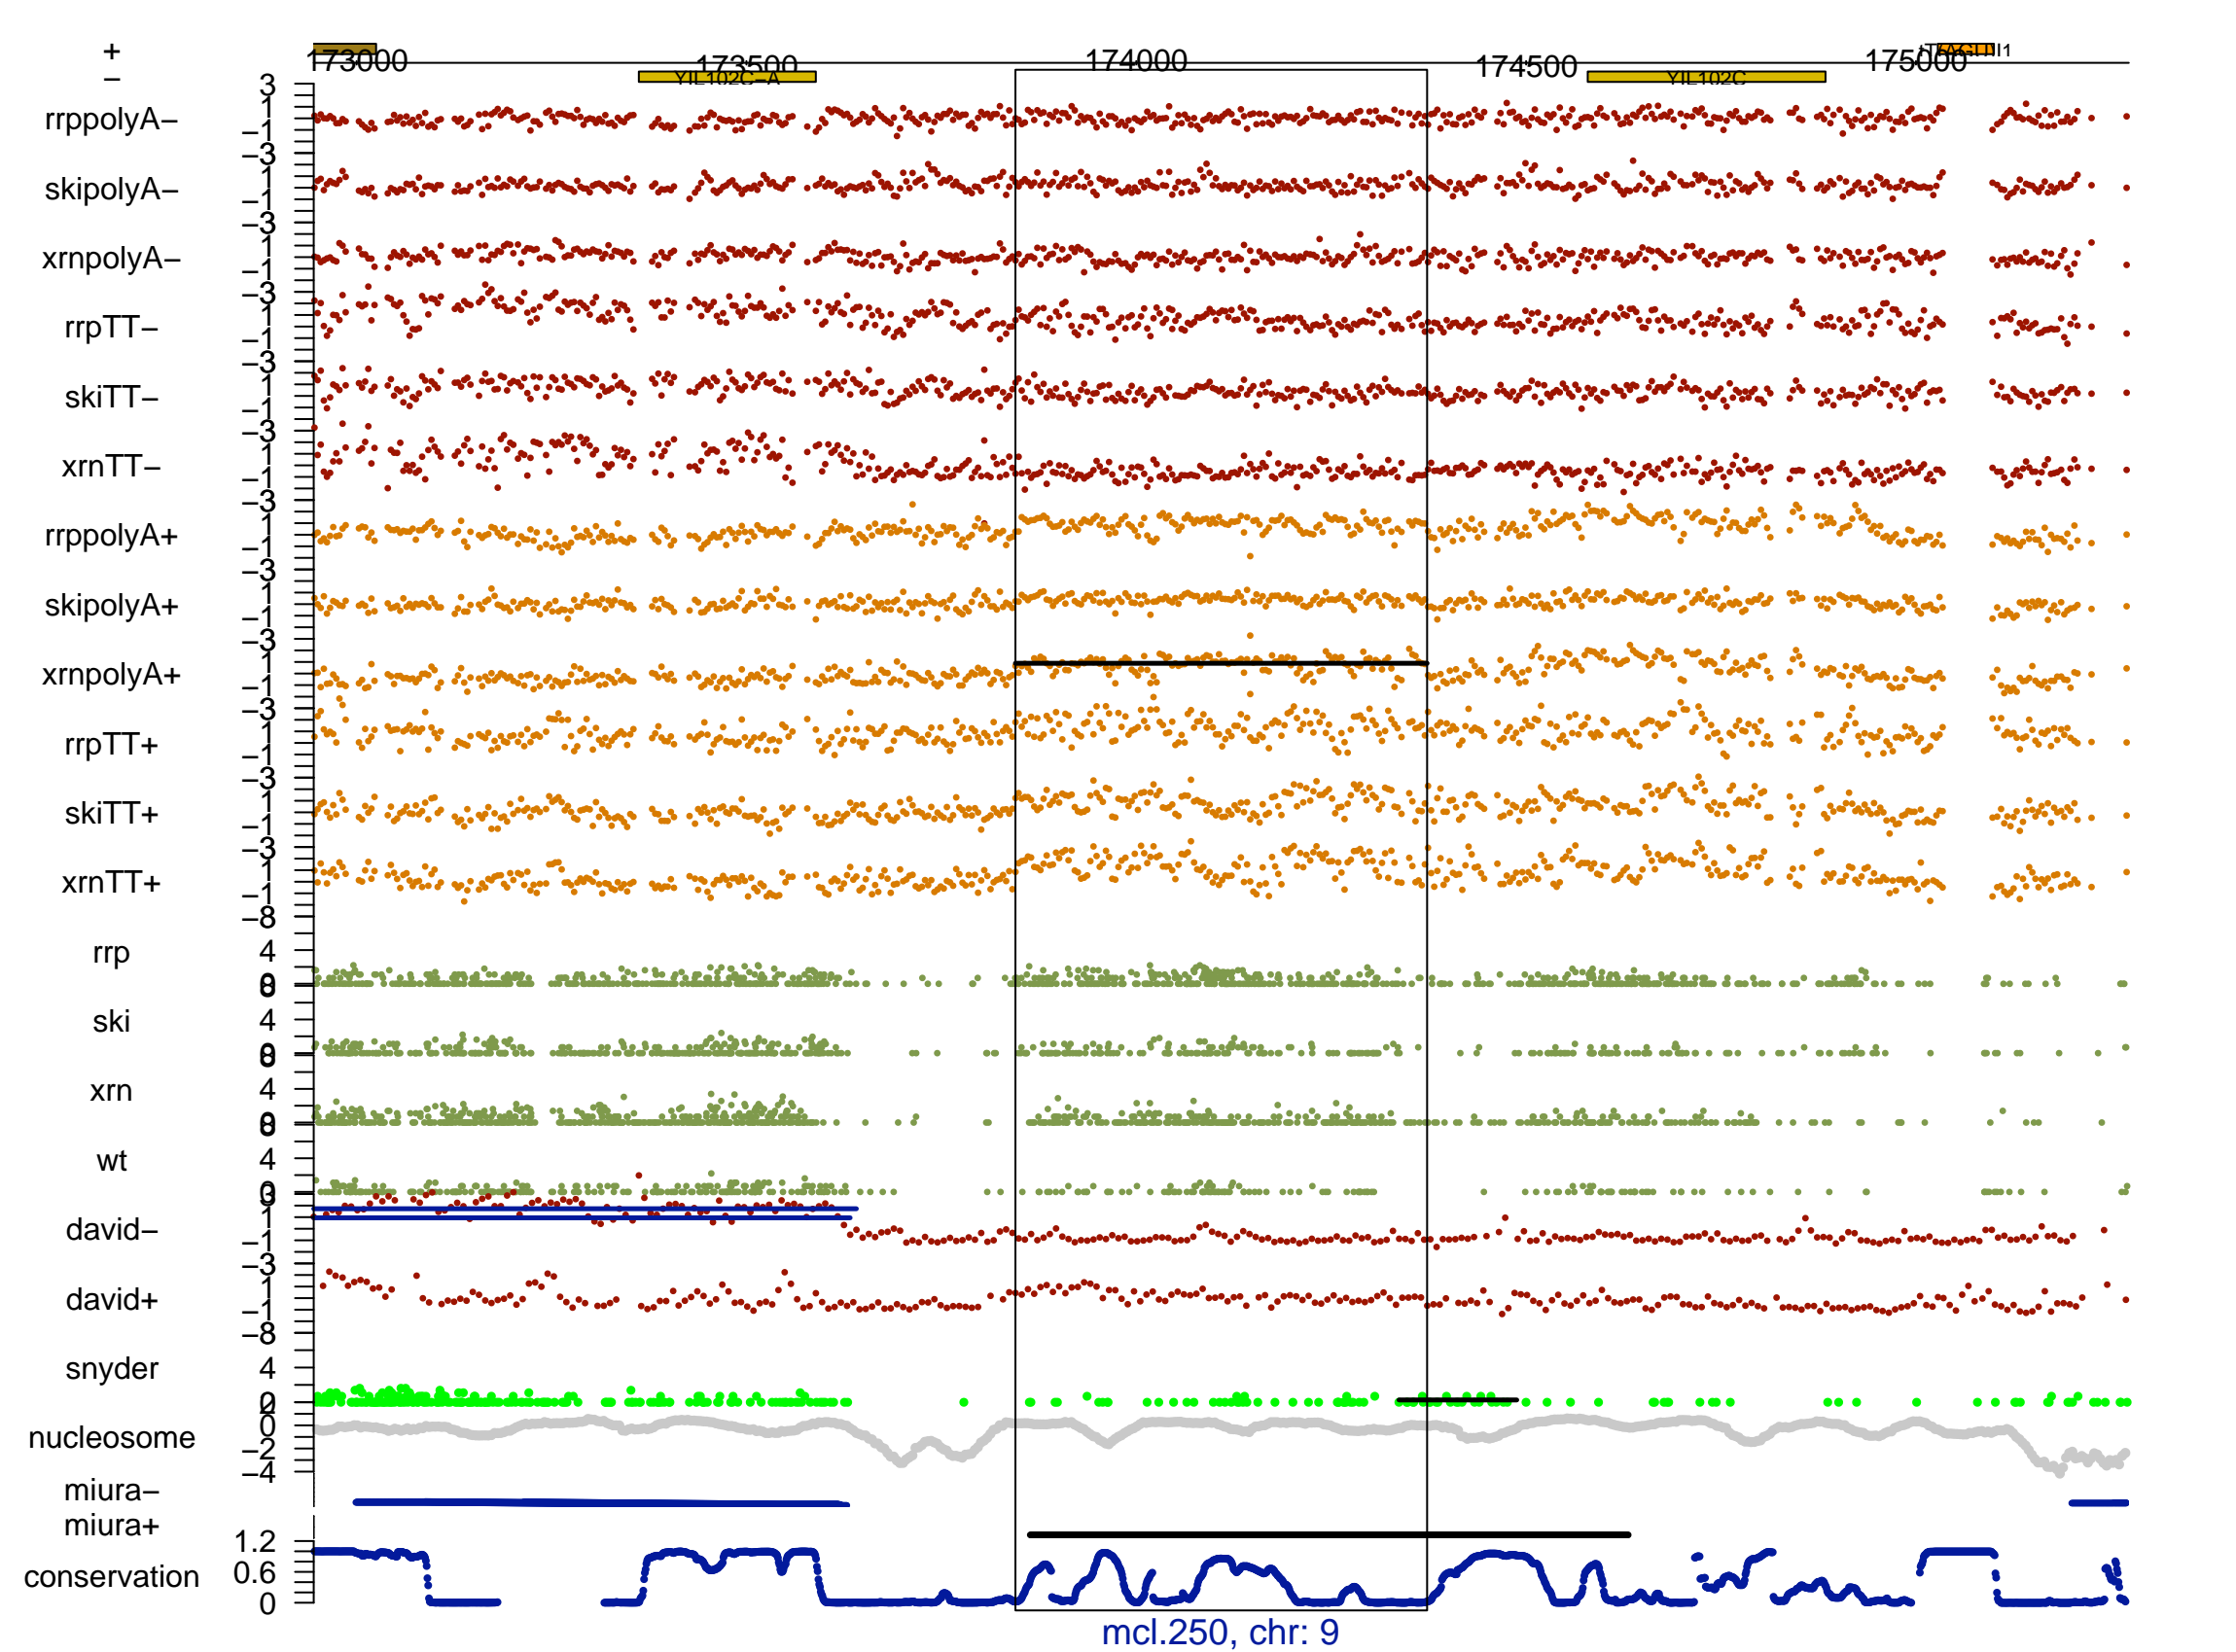

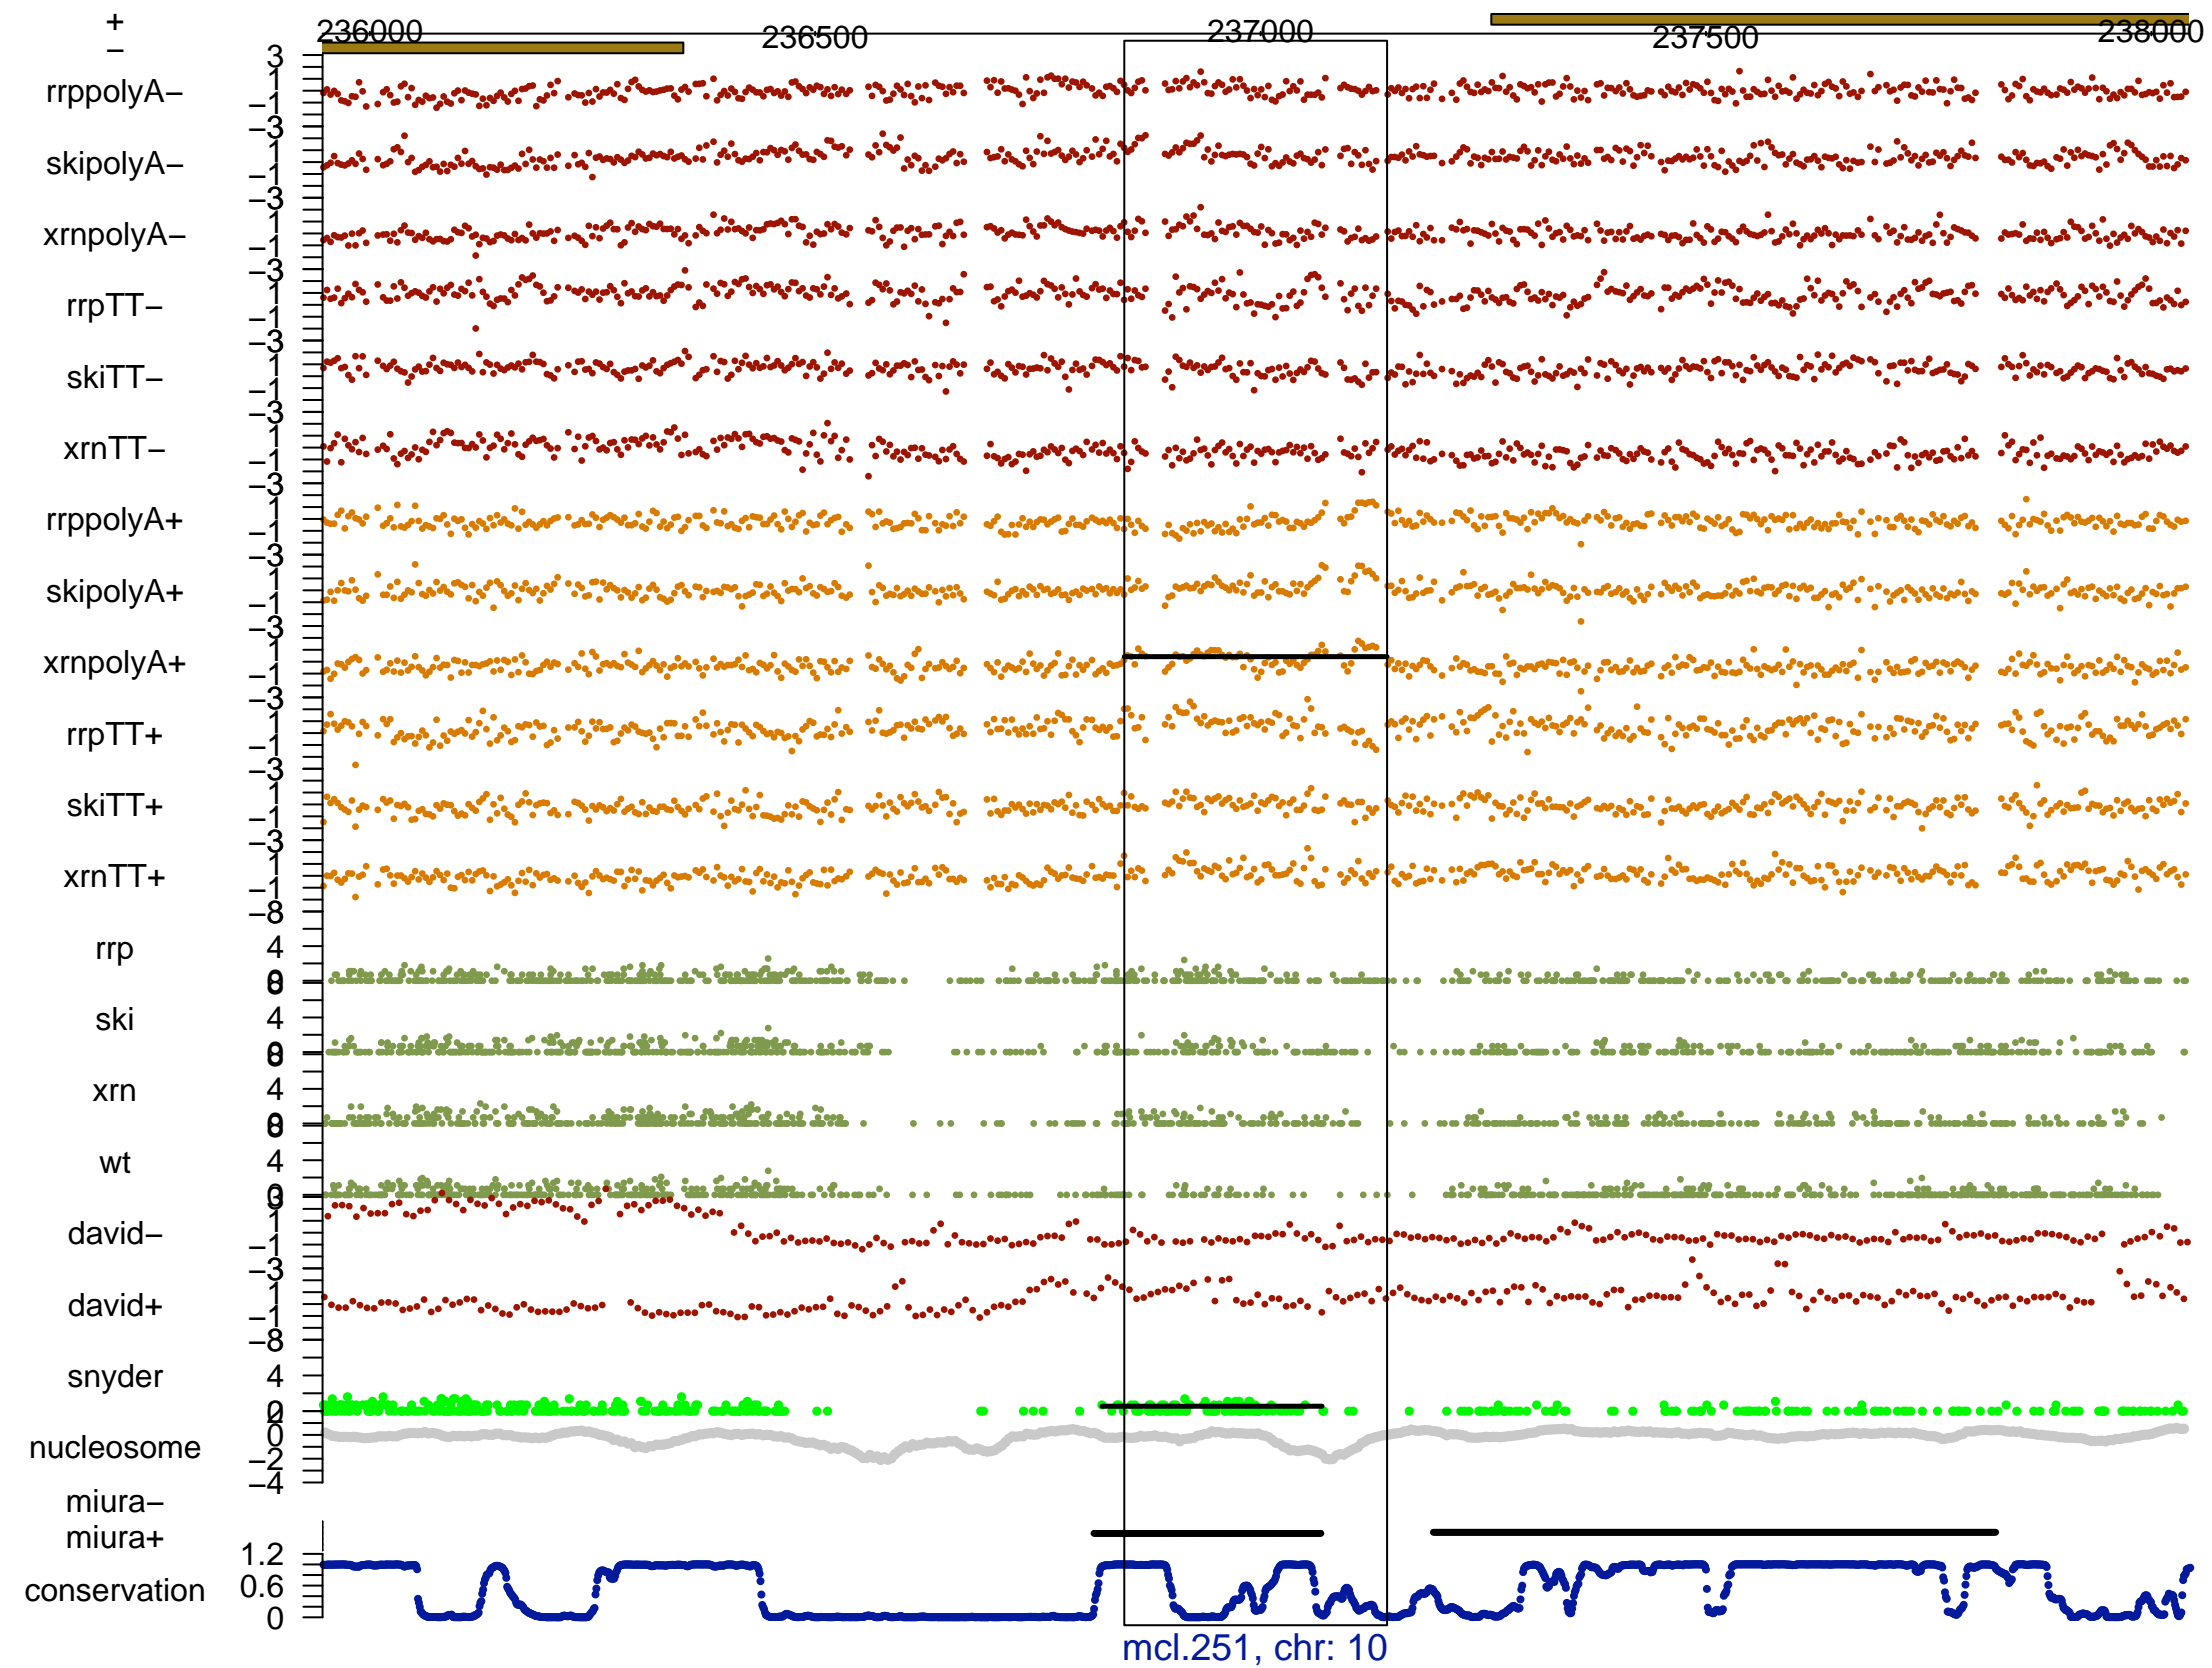

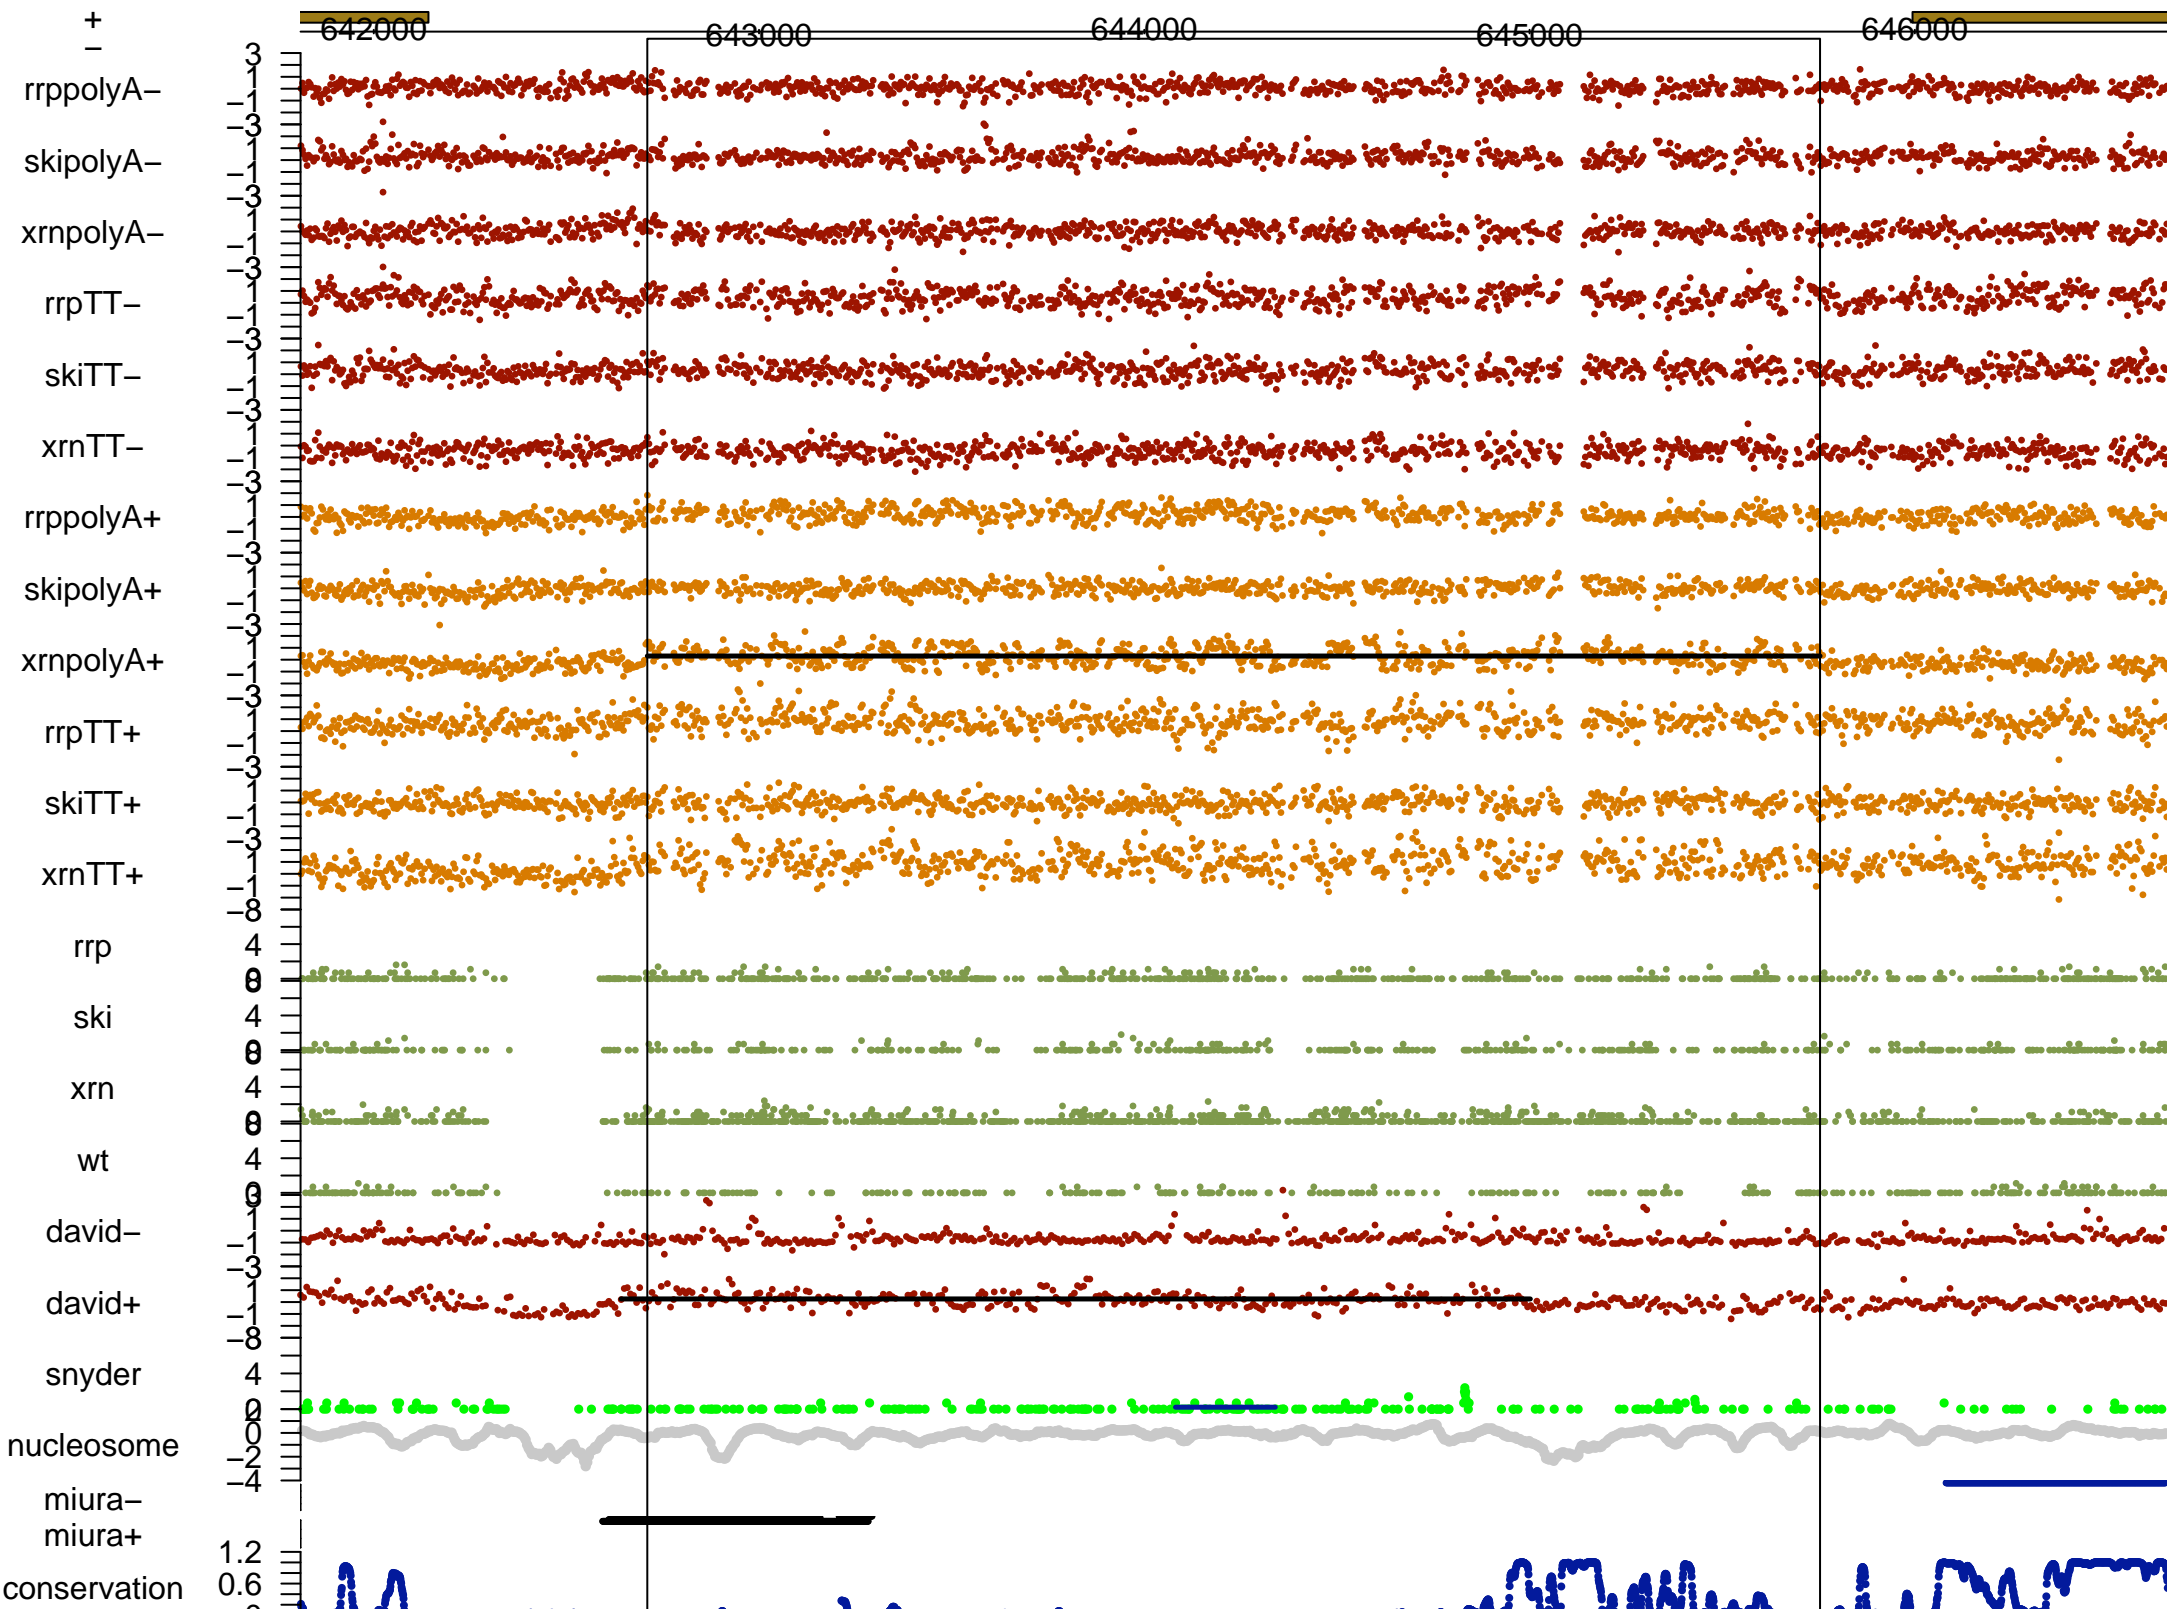

mcl.252, chr: 11



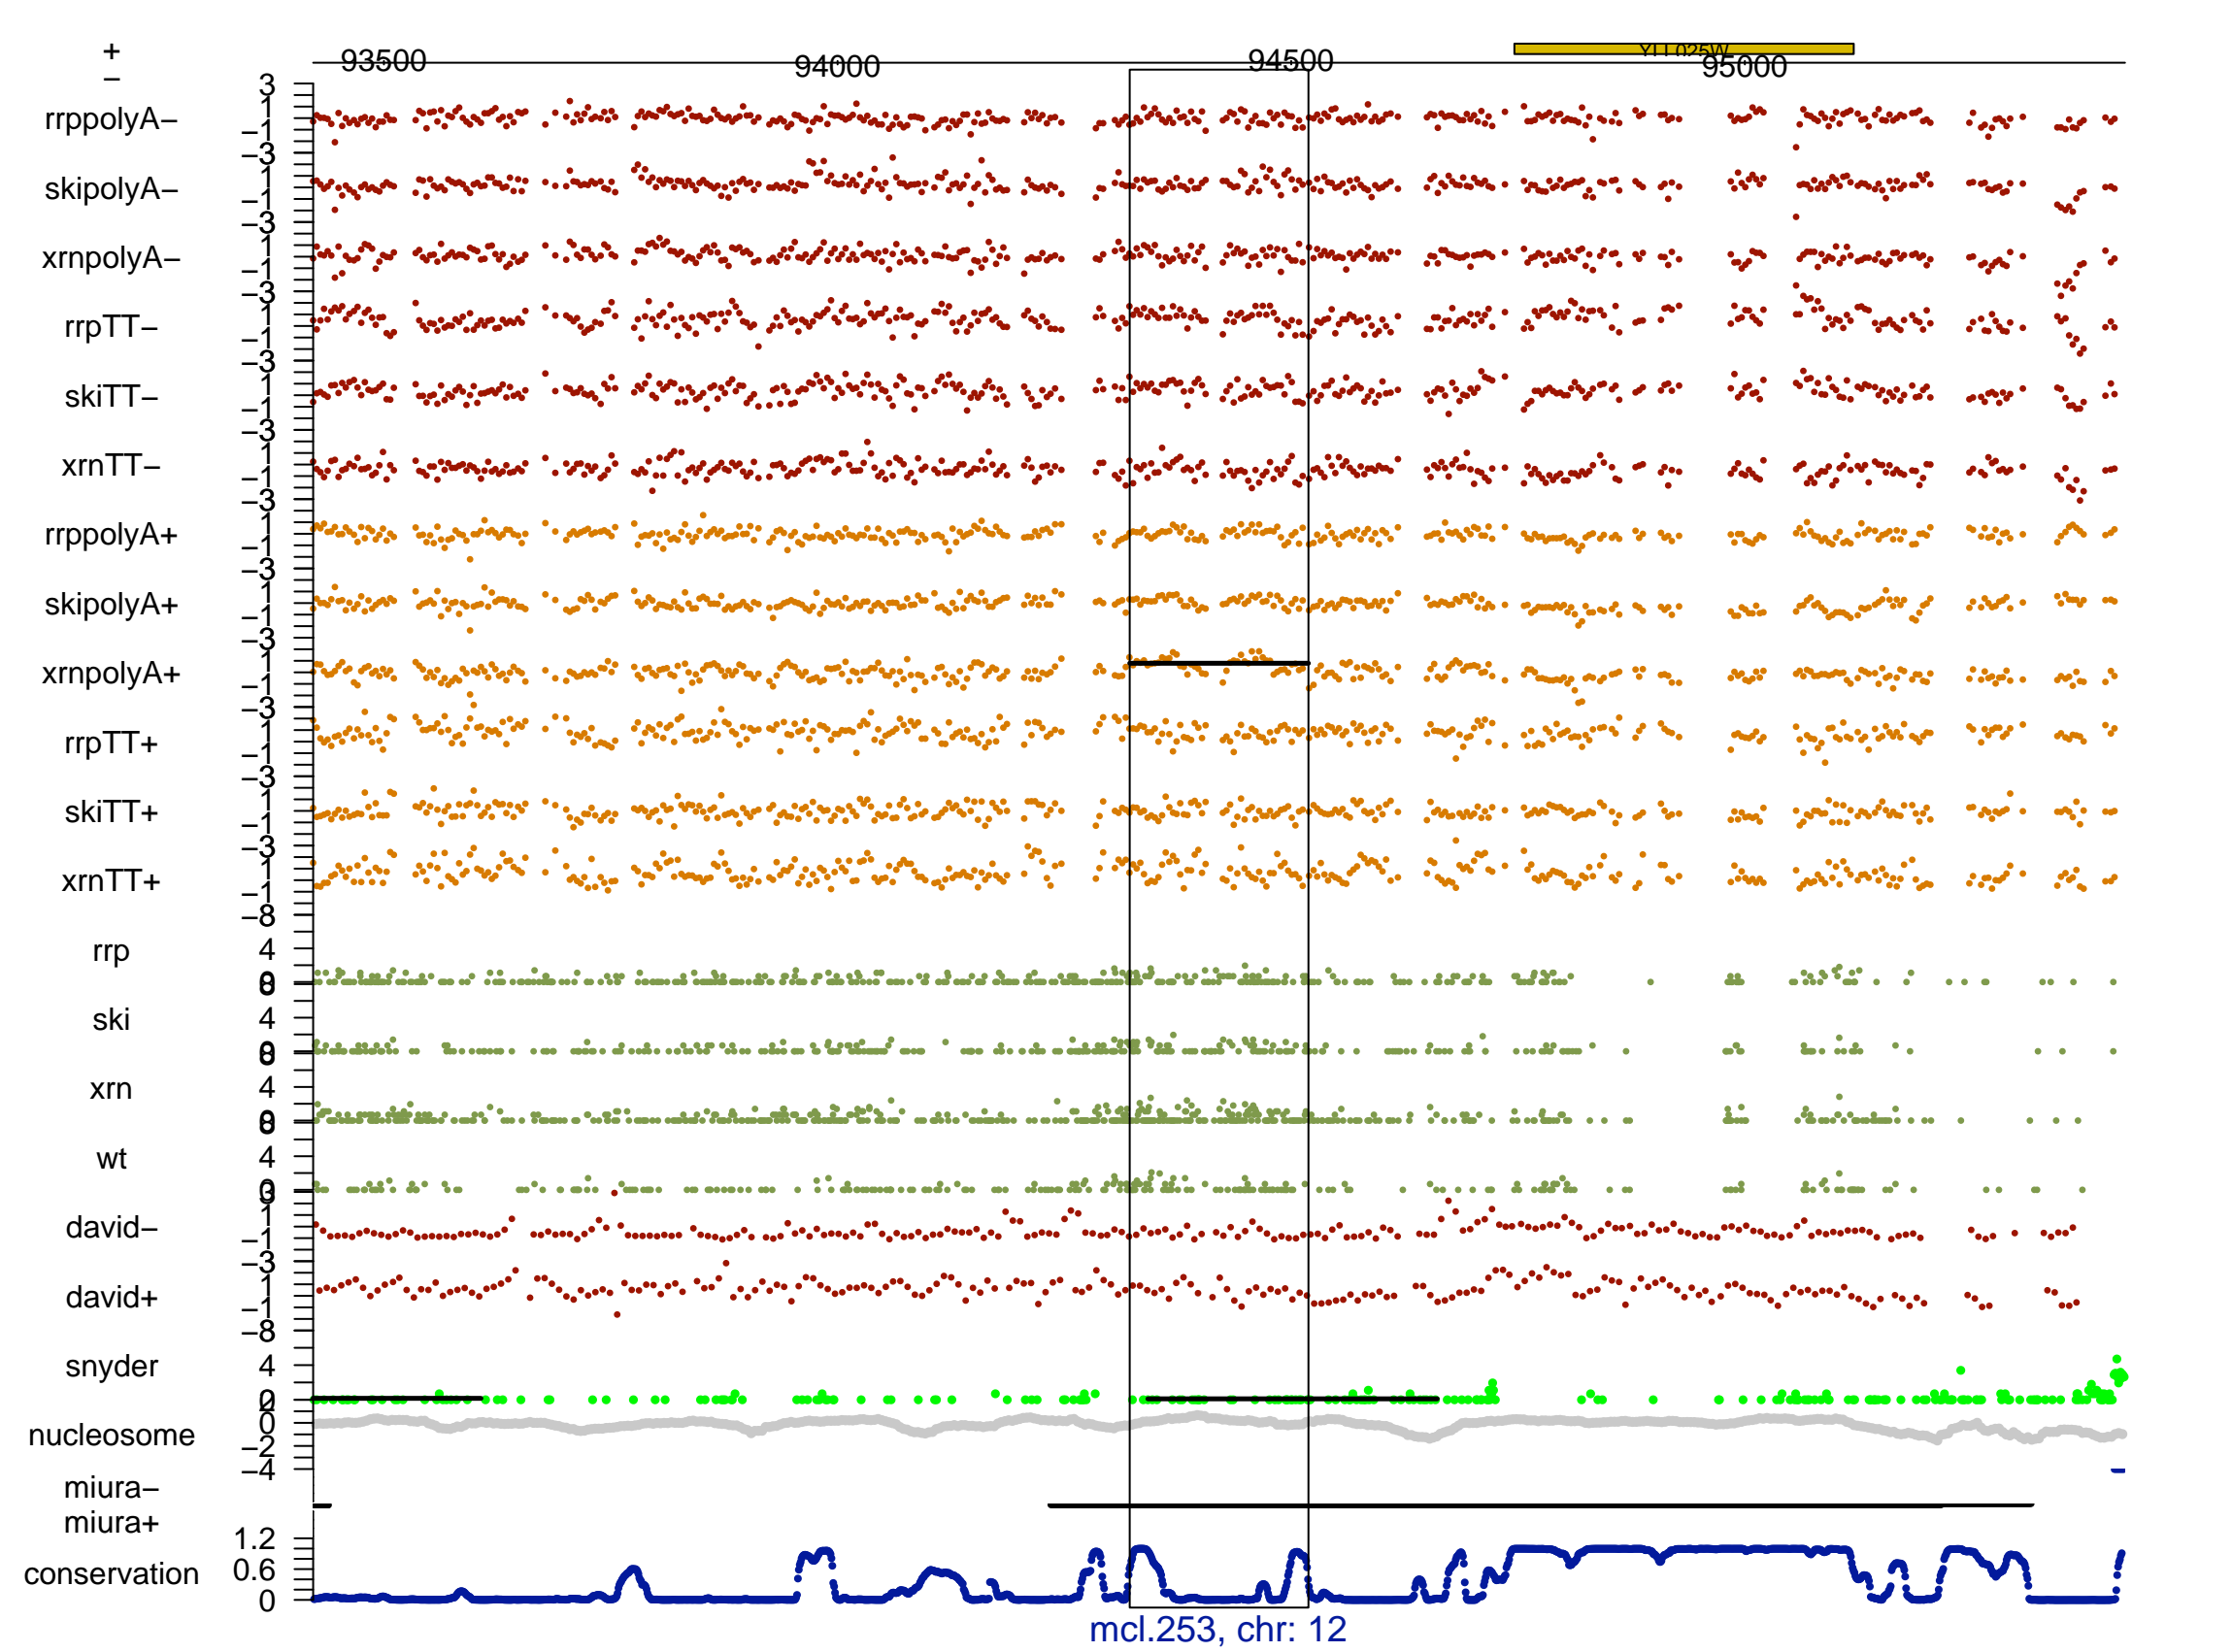



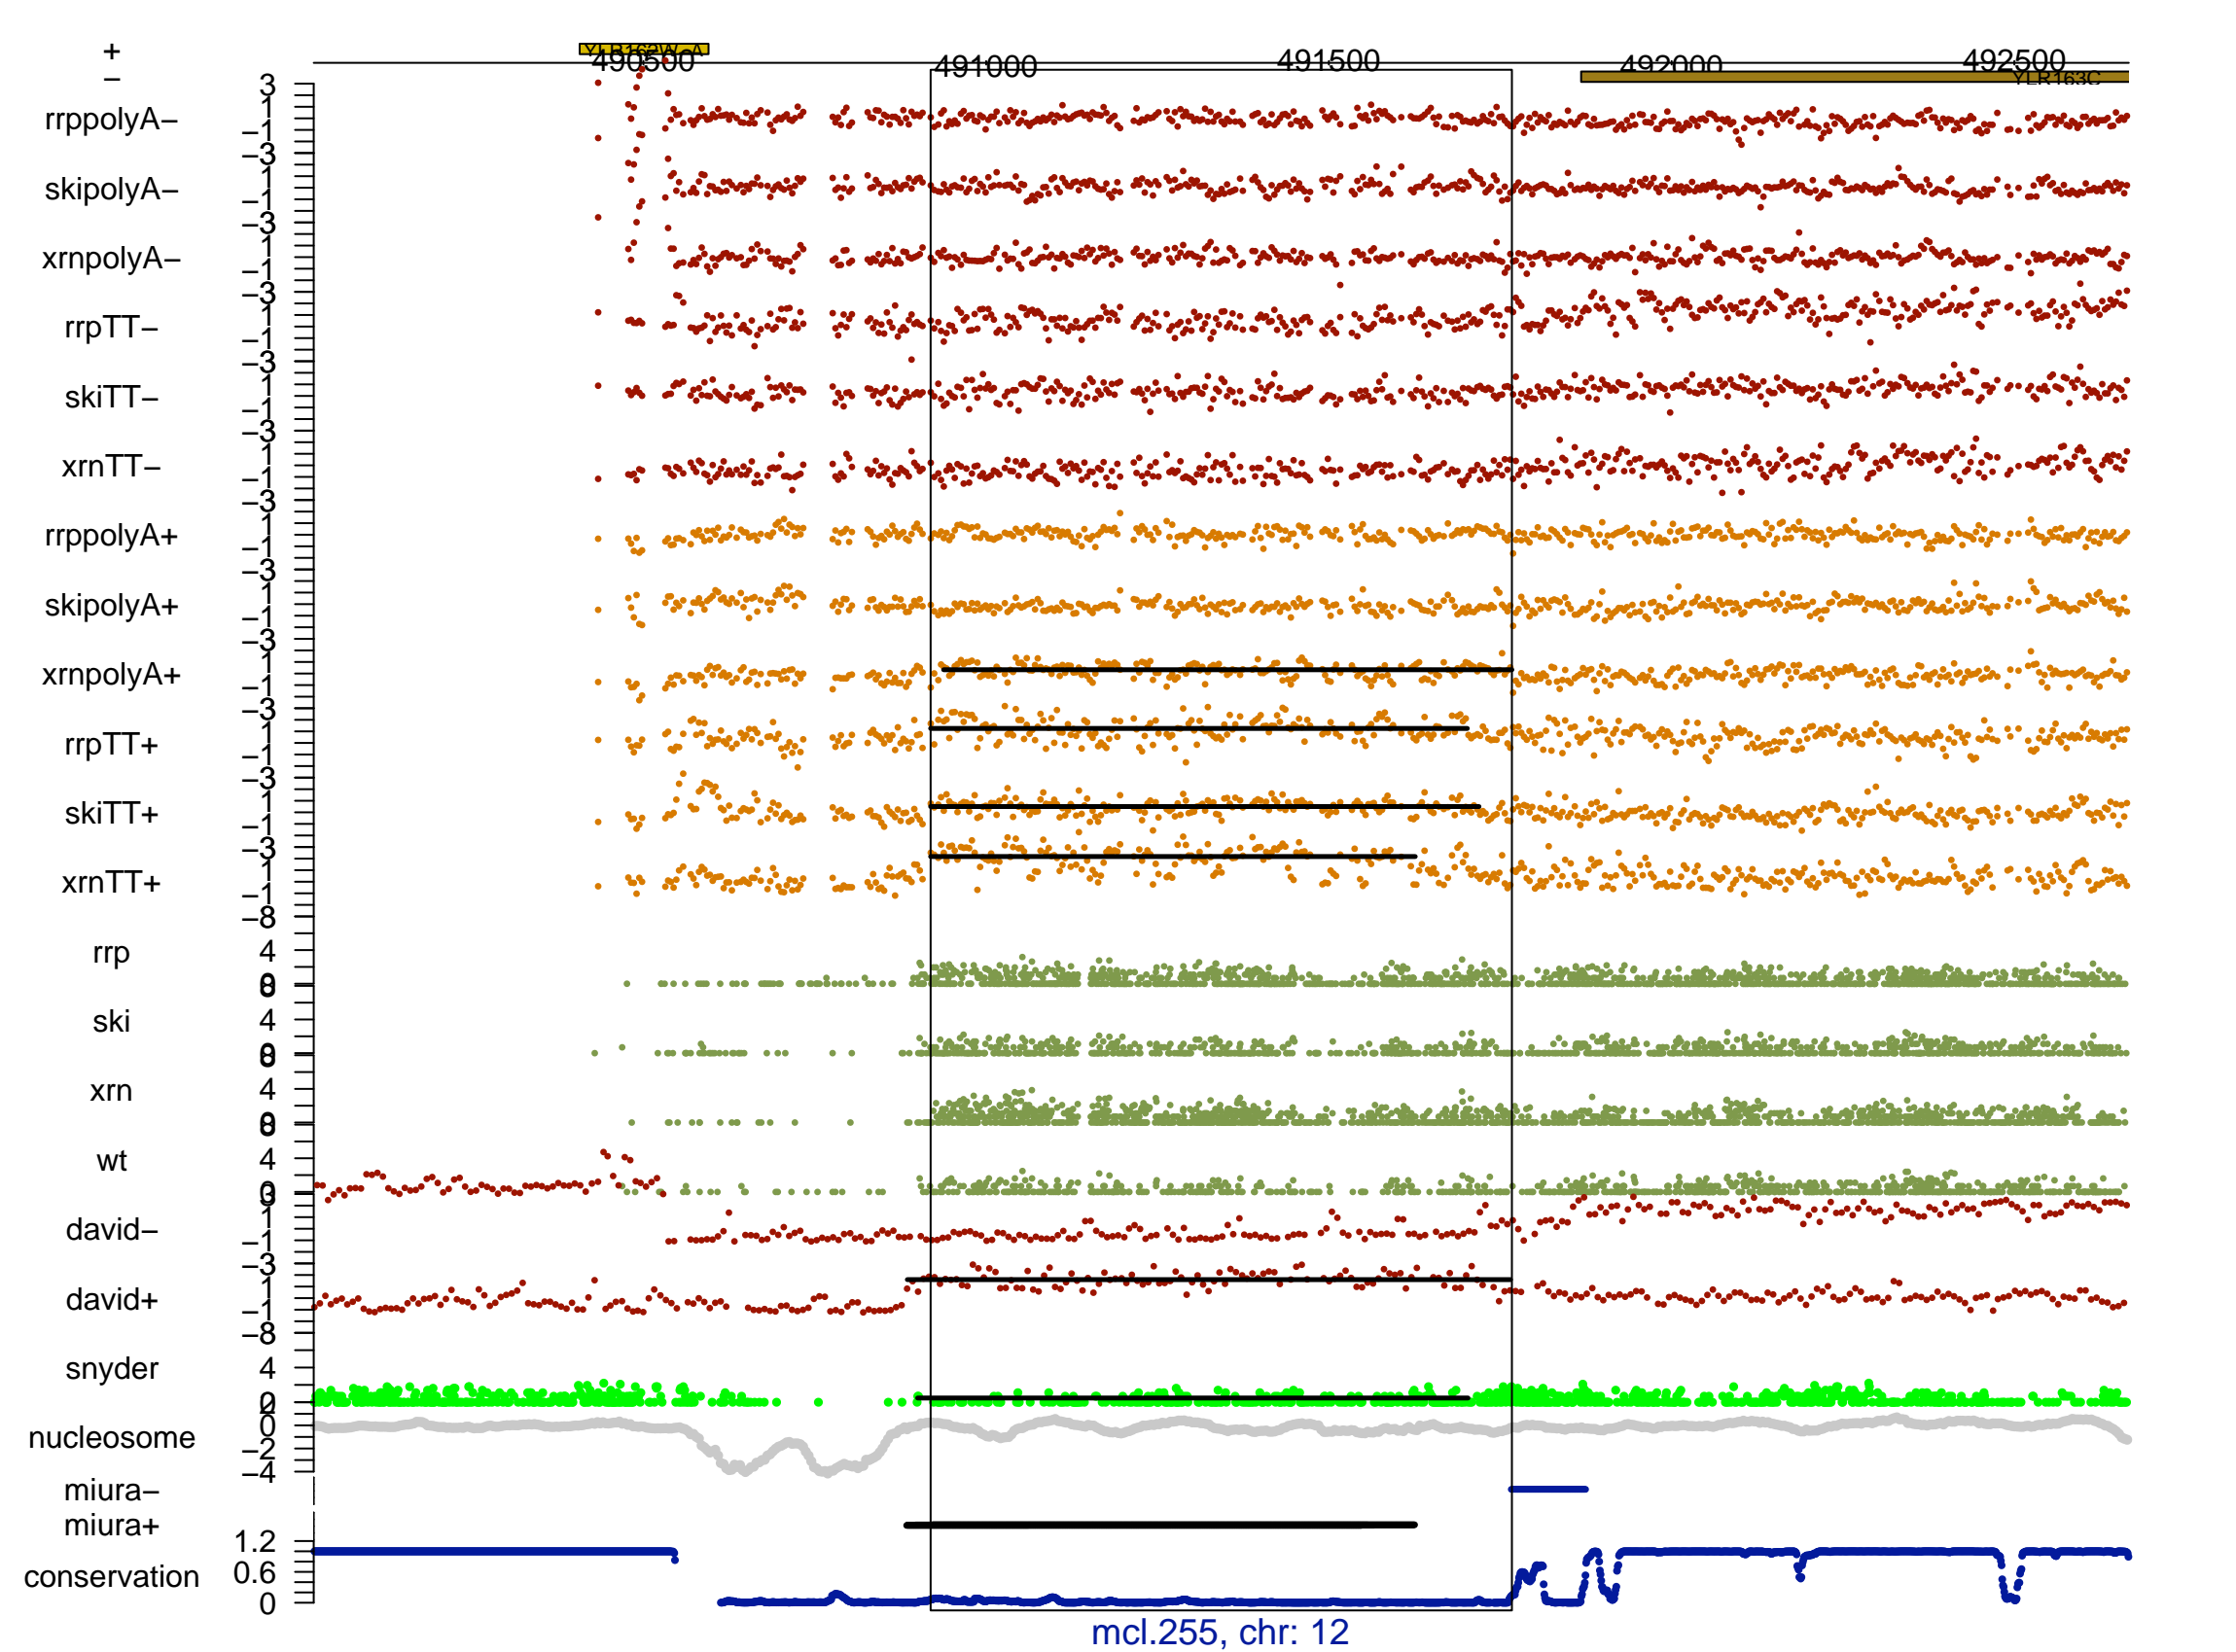





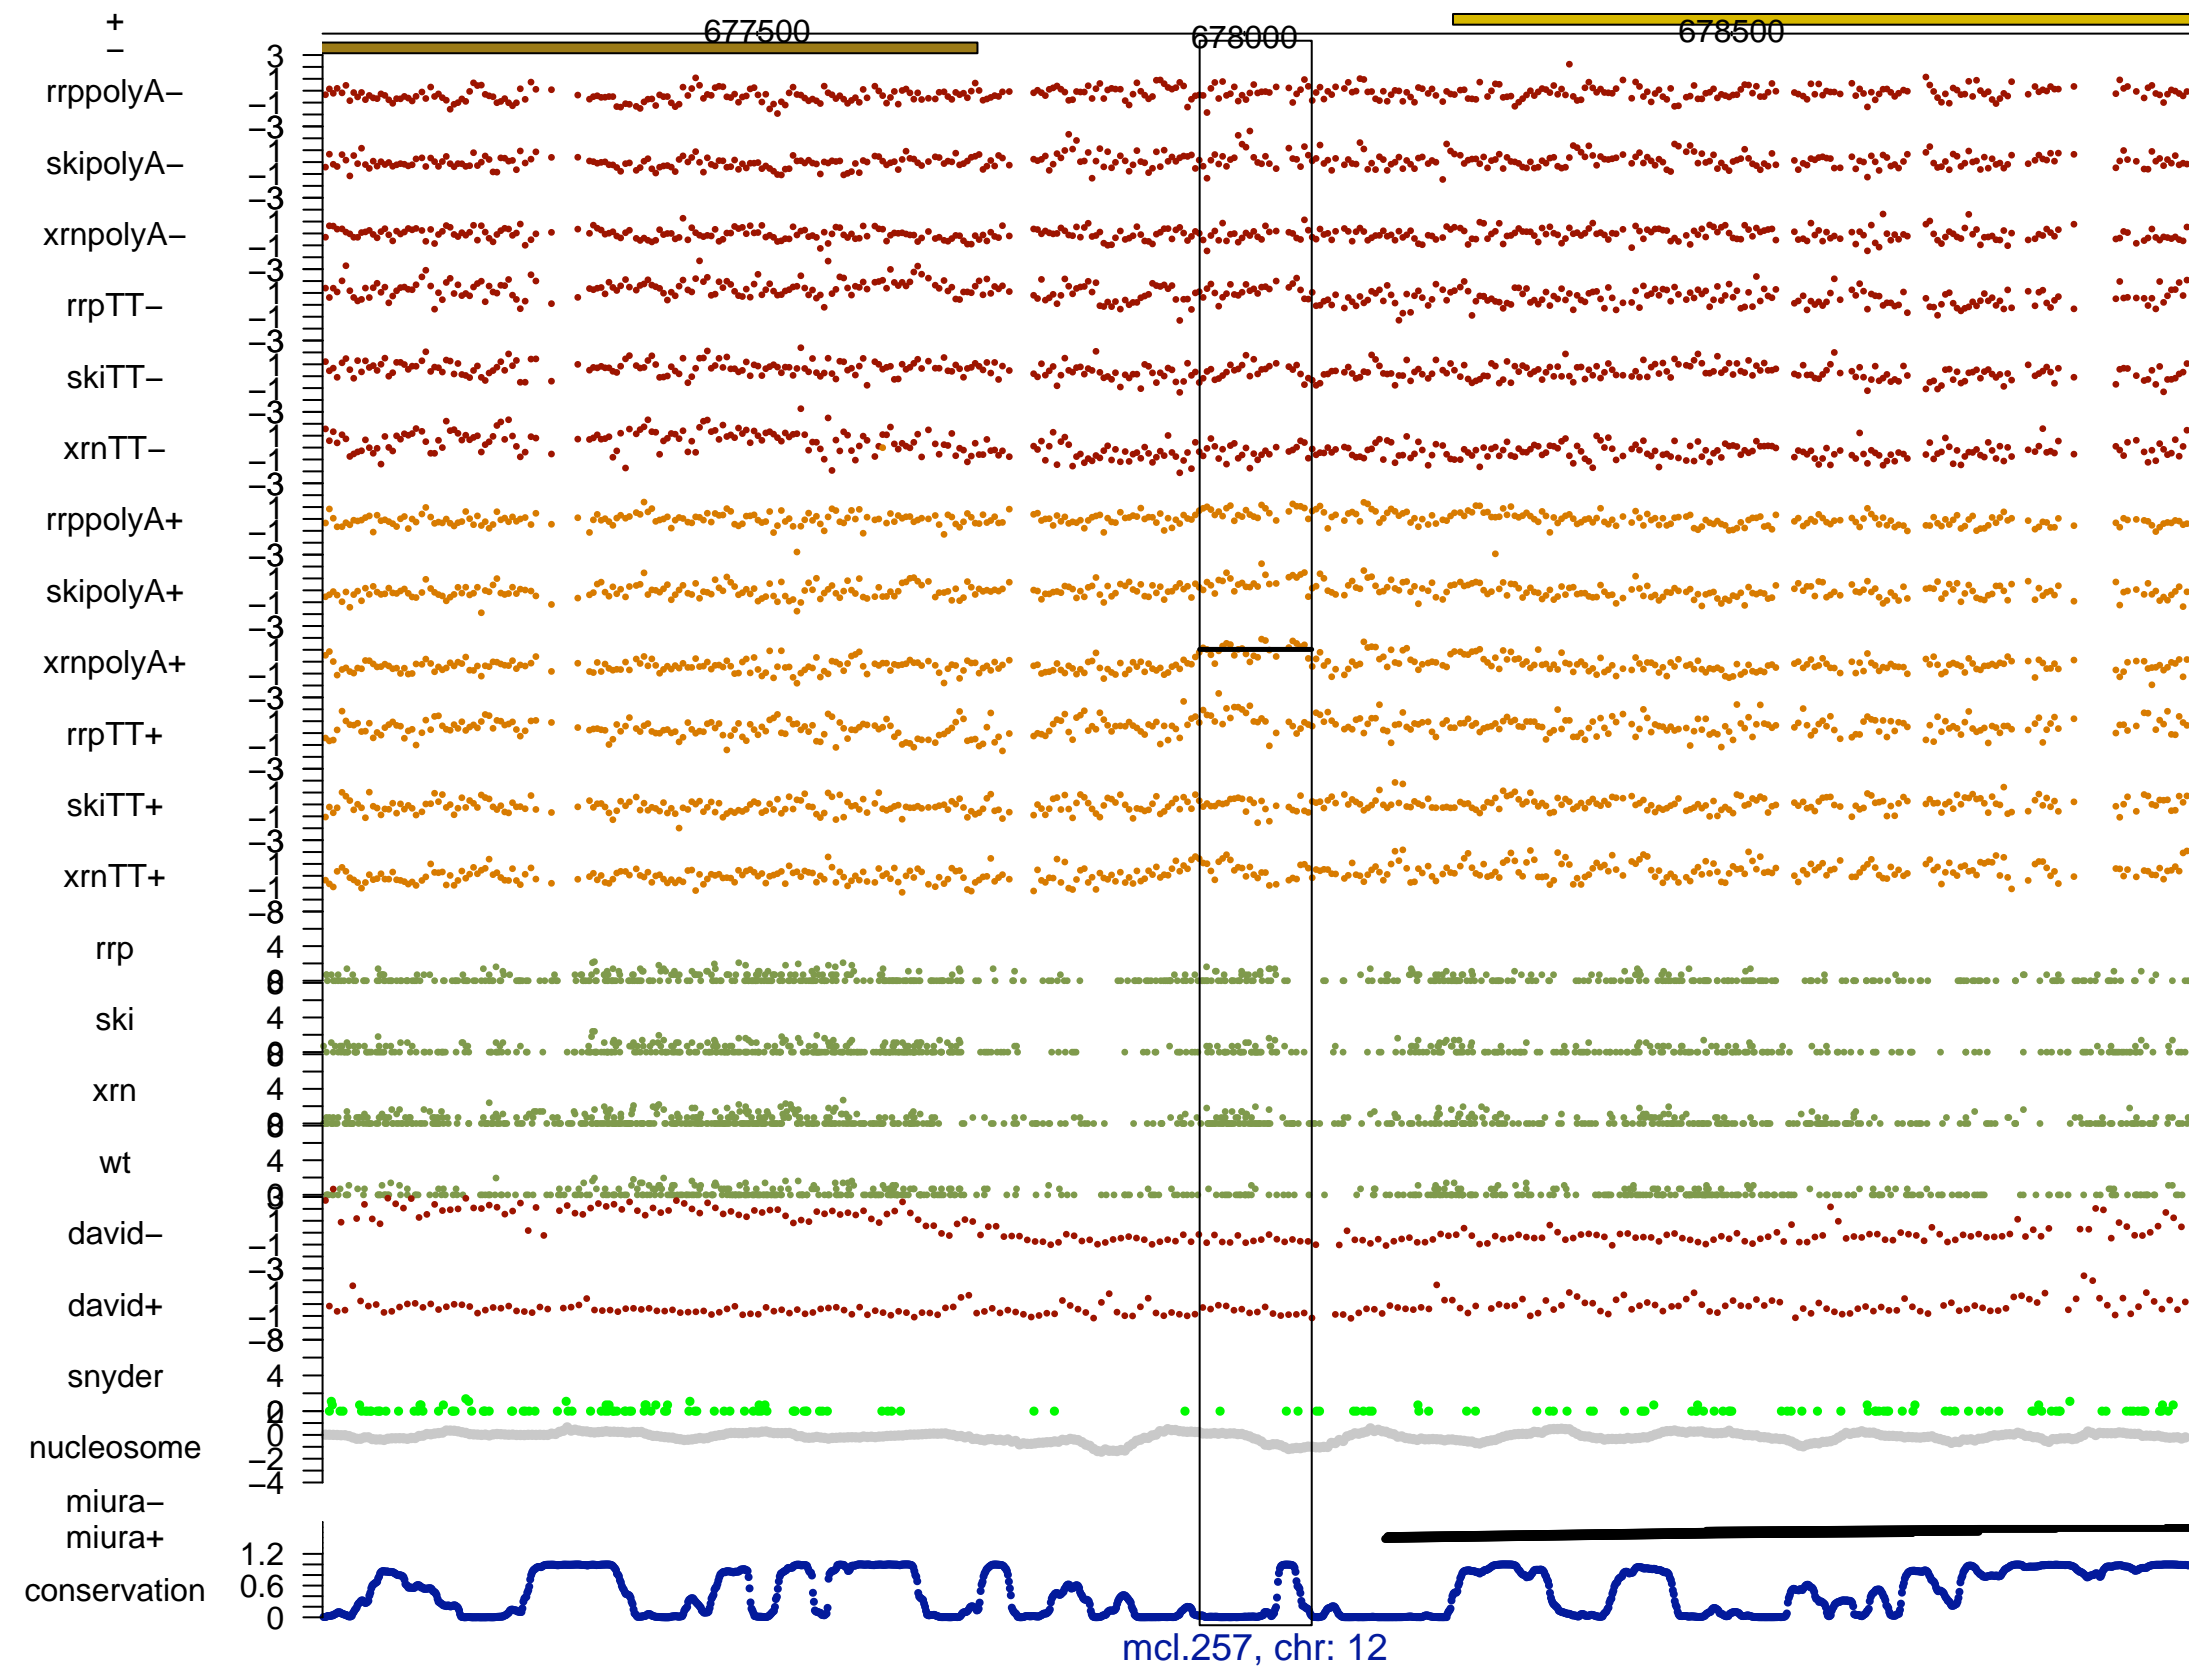

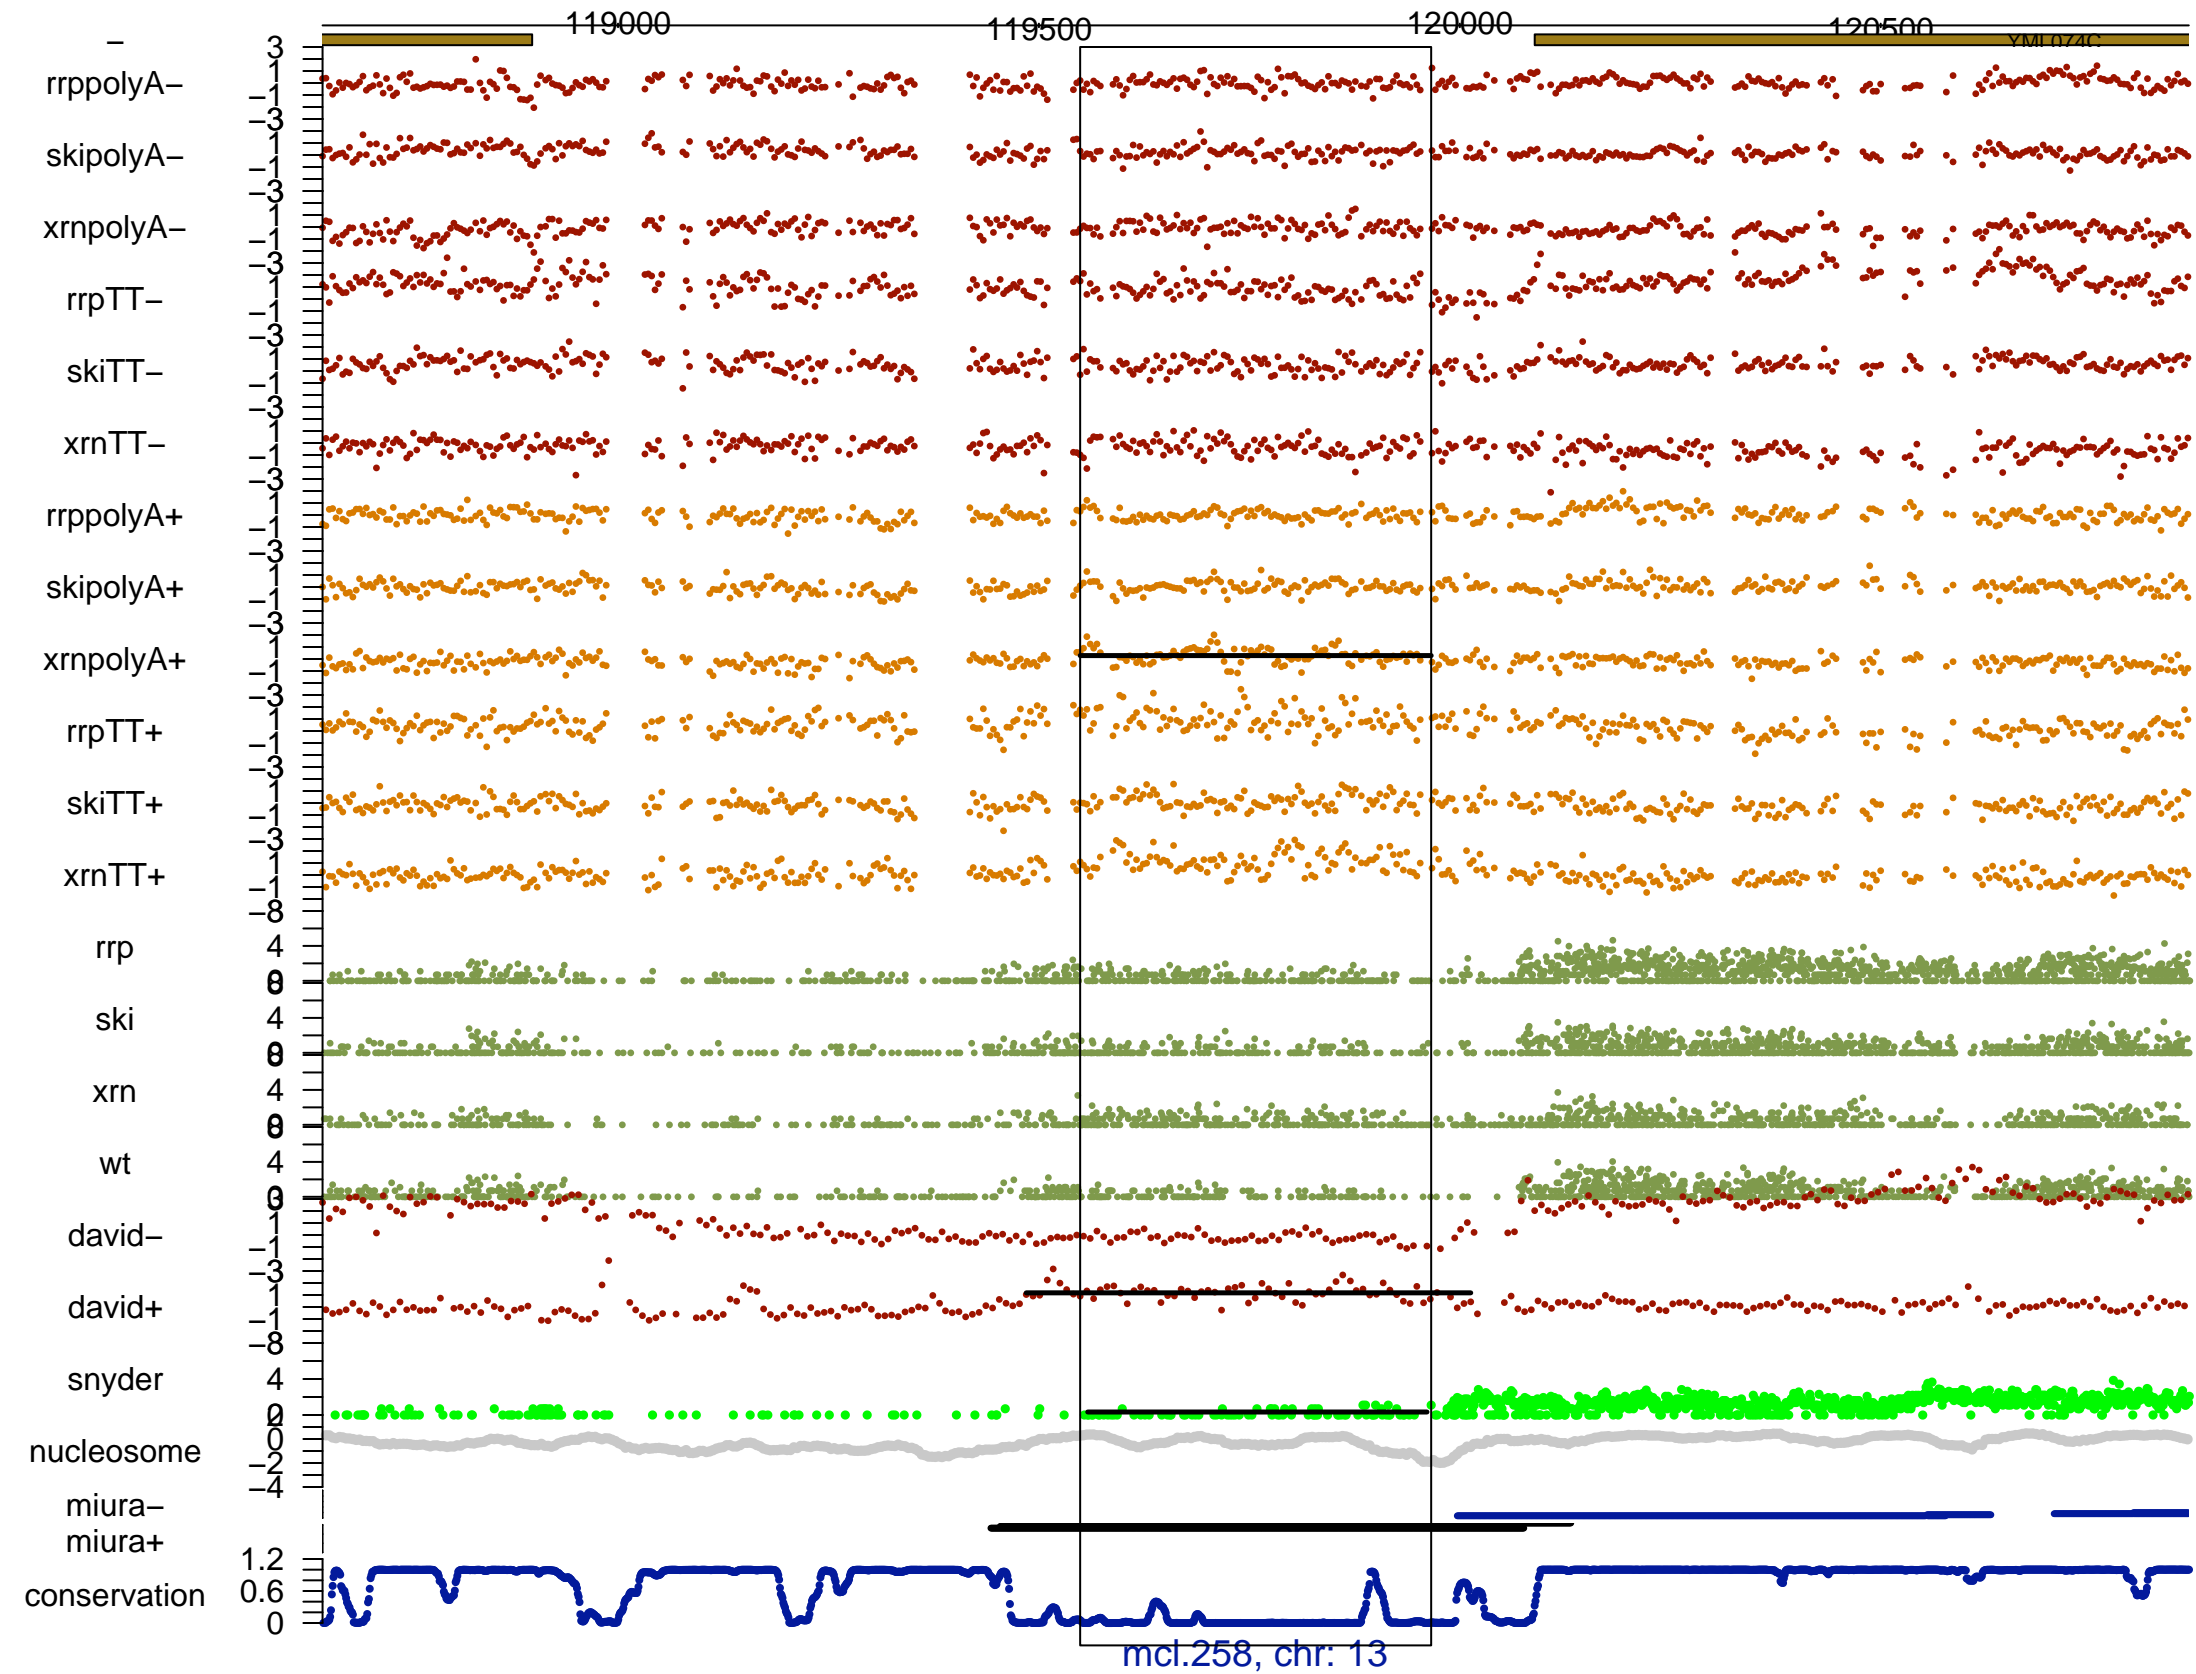

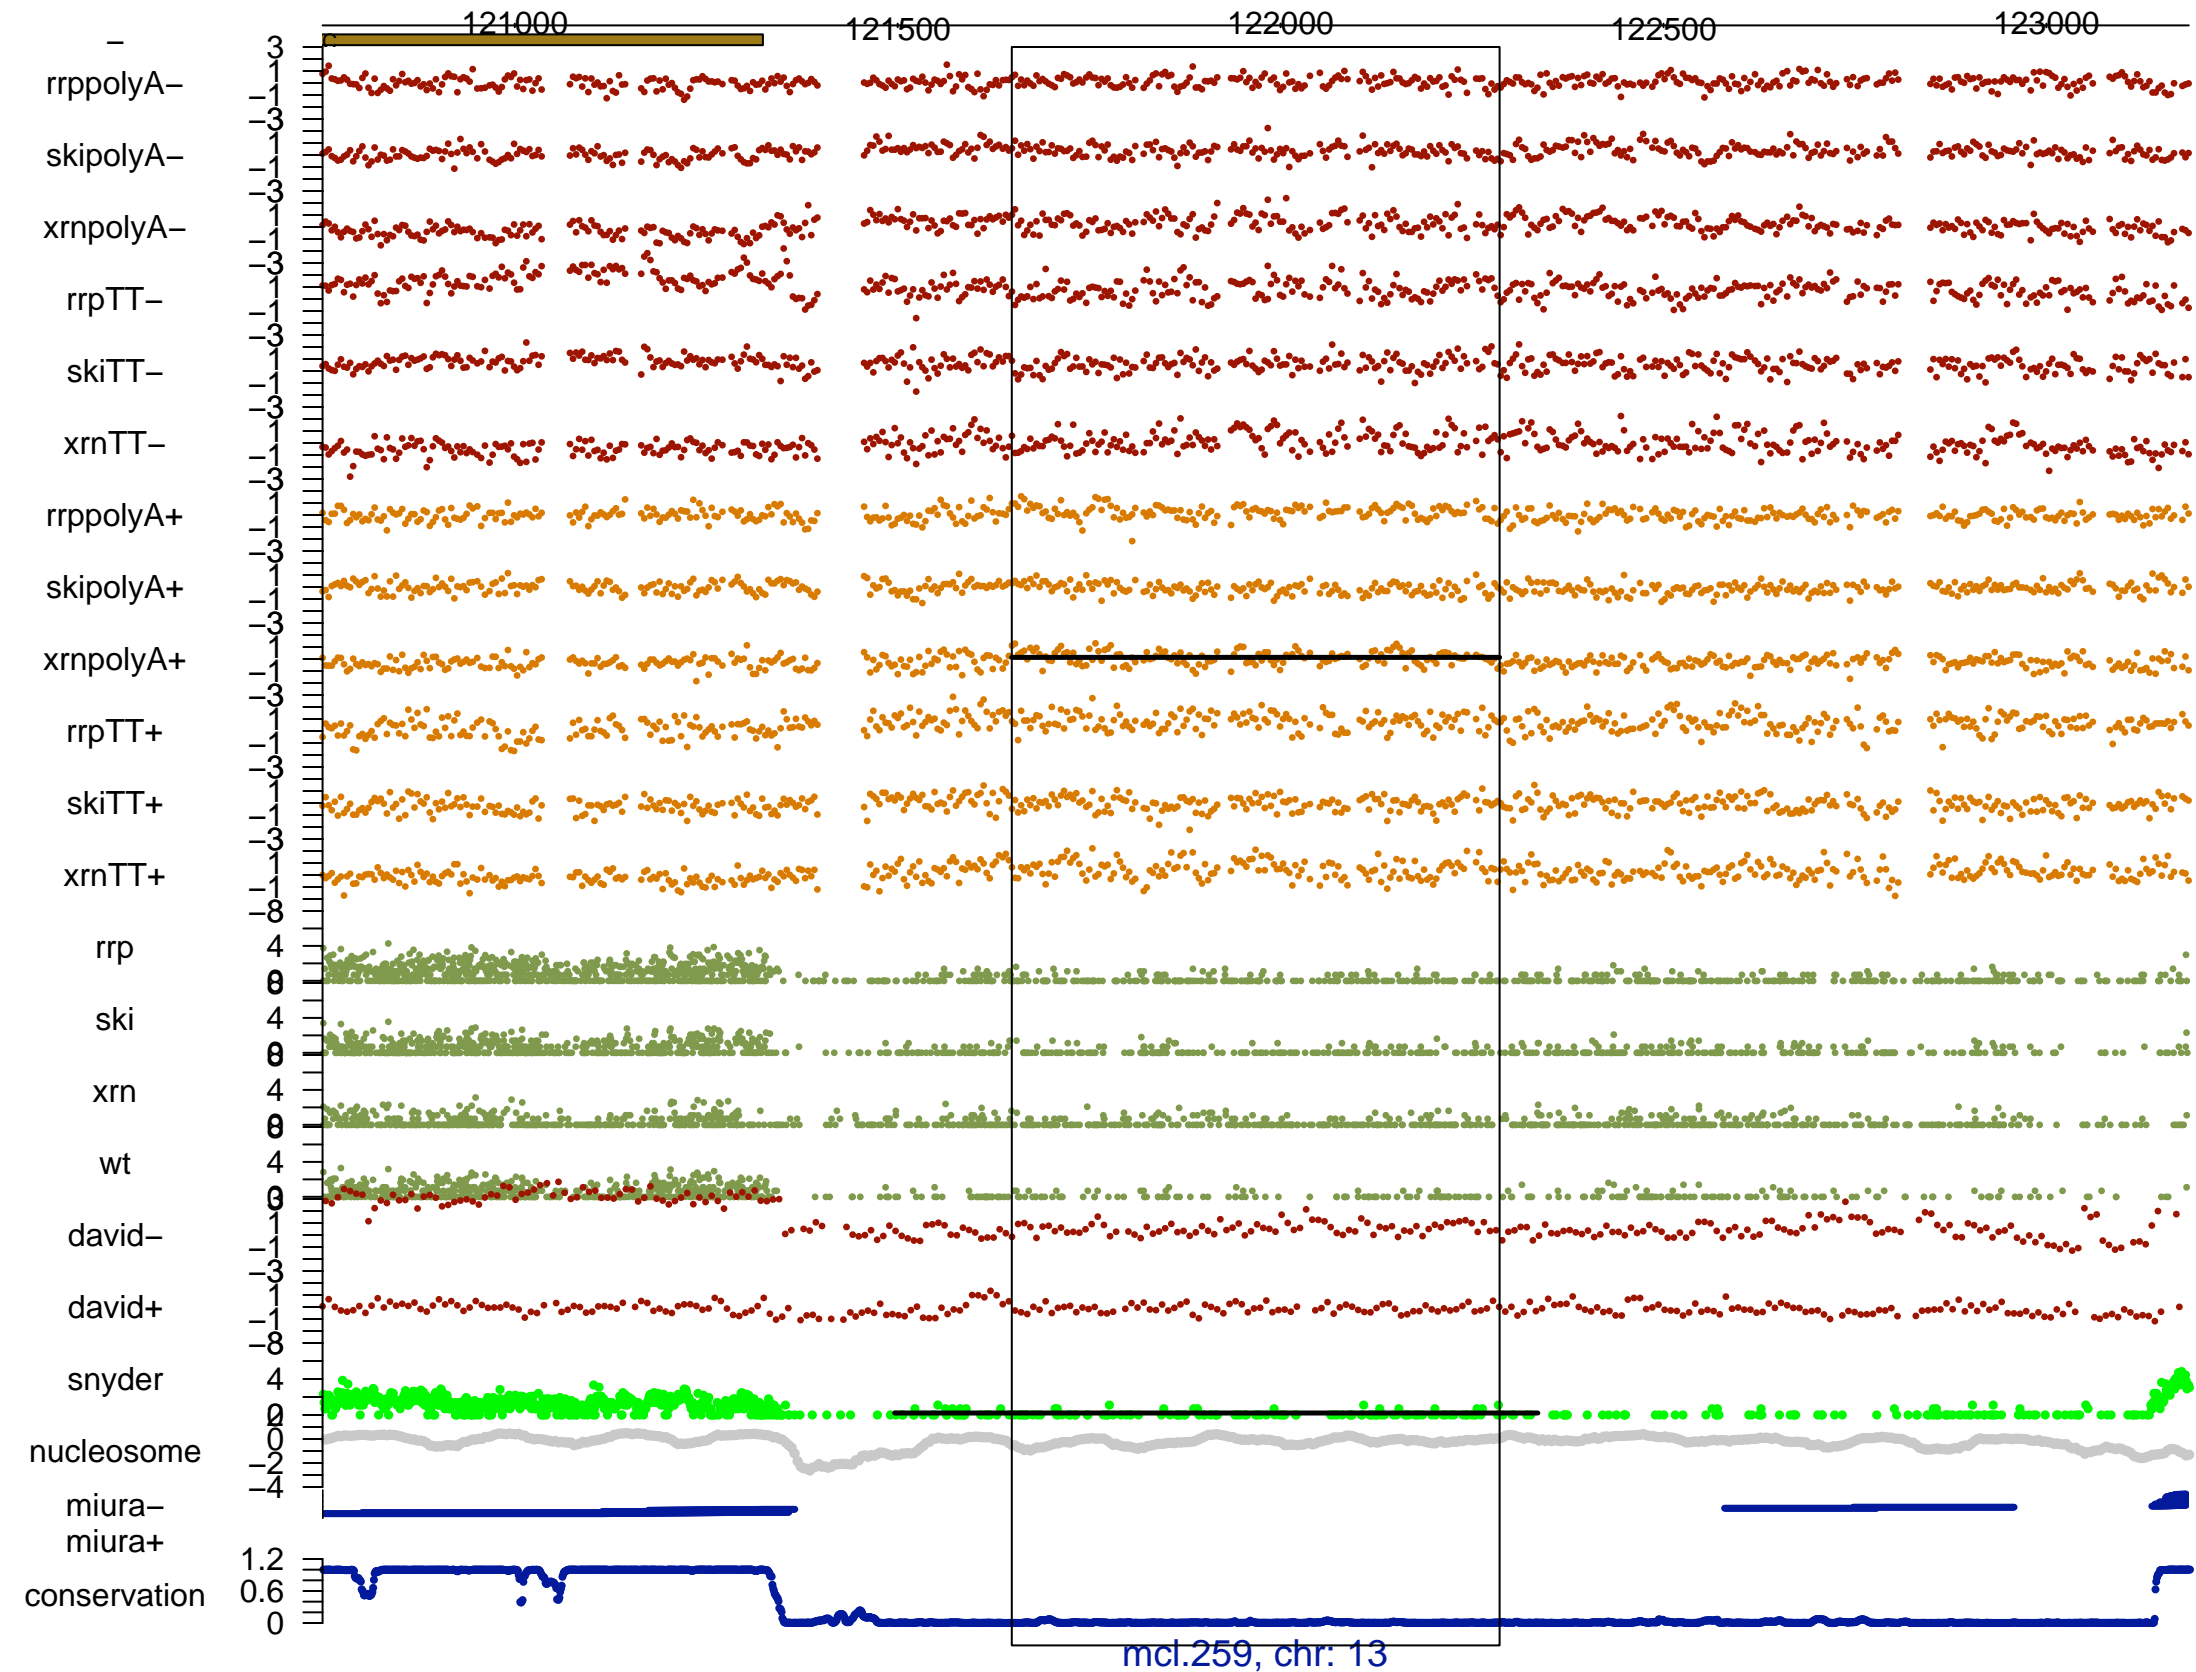





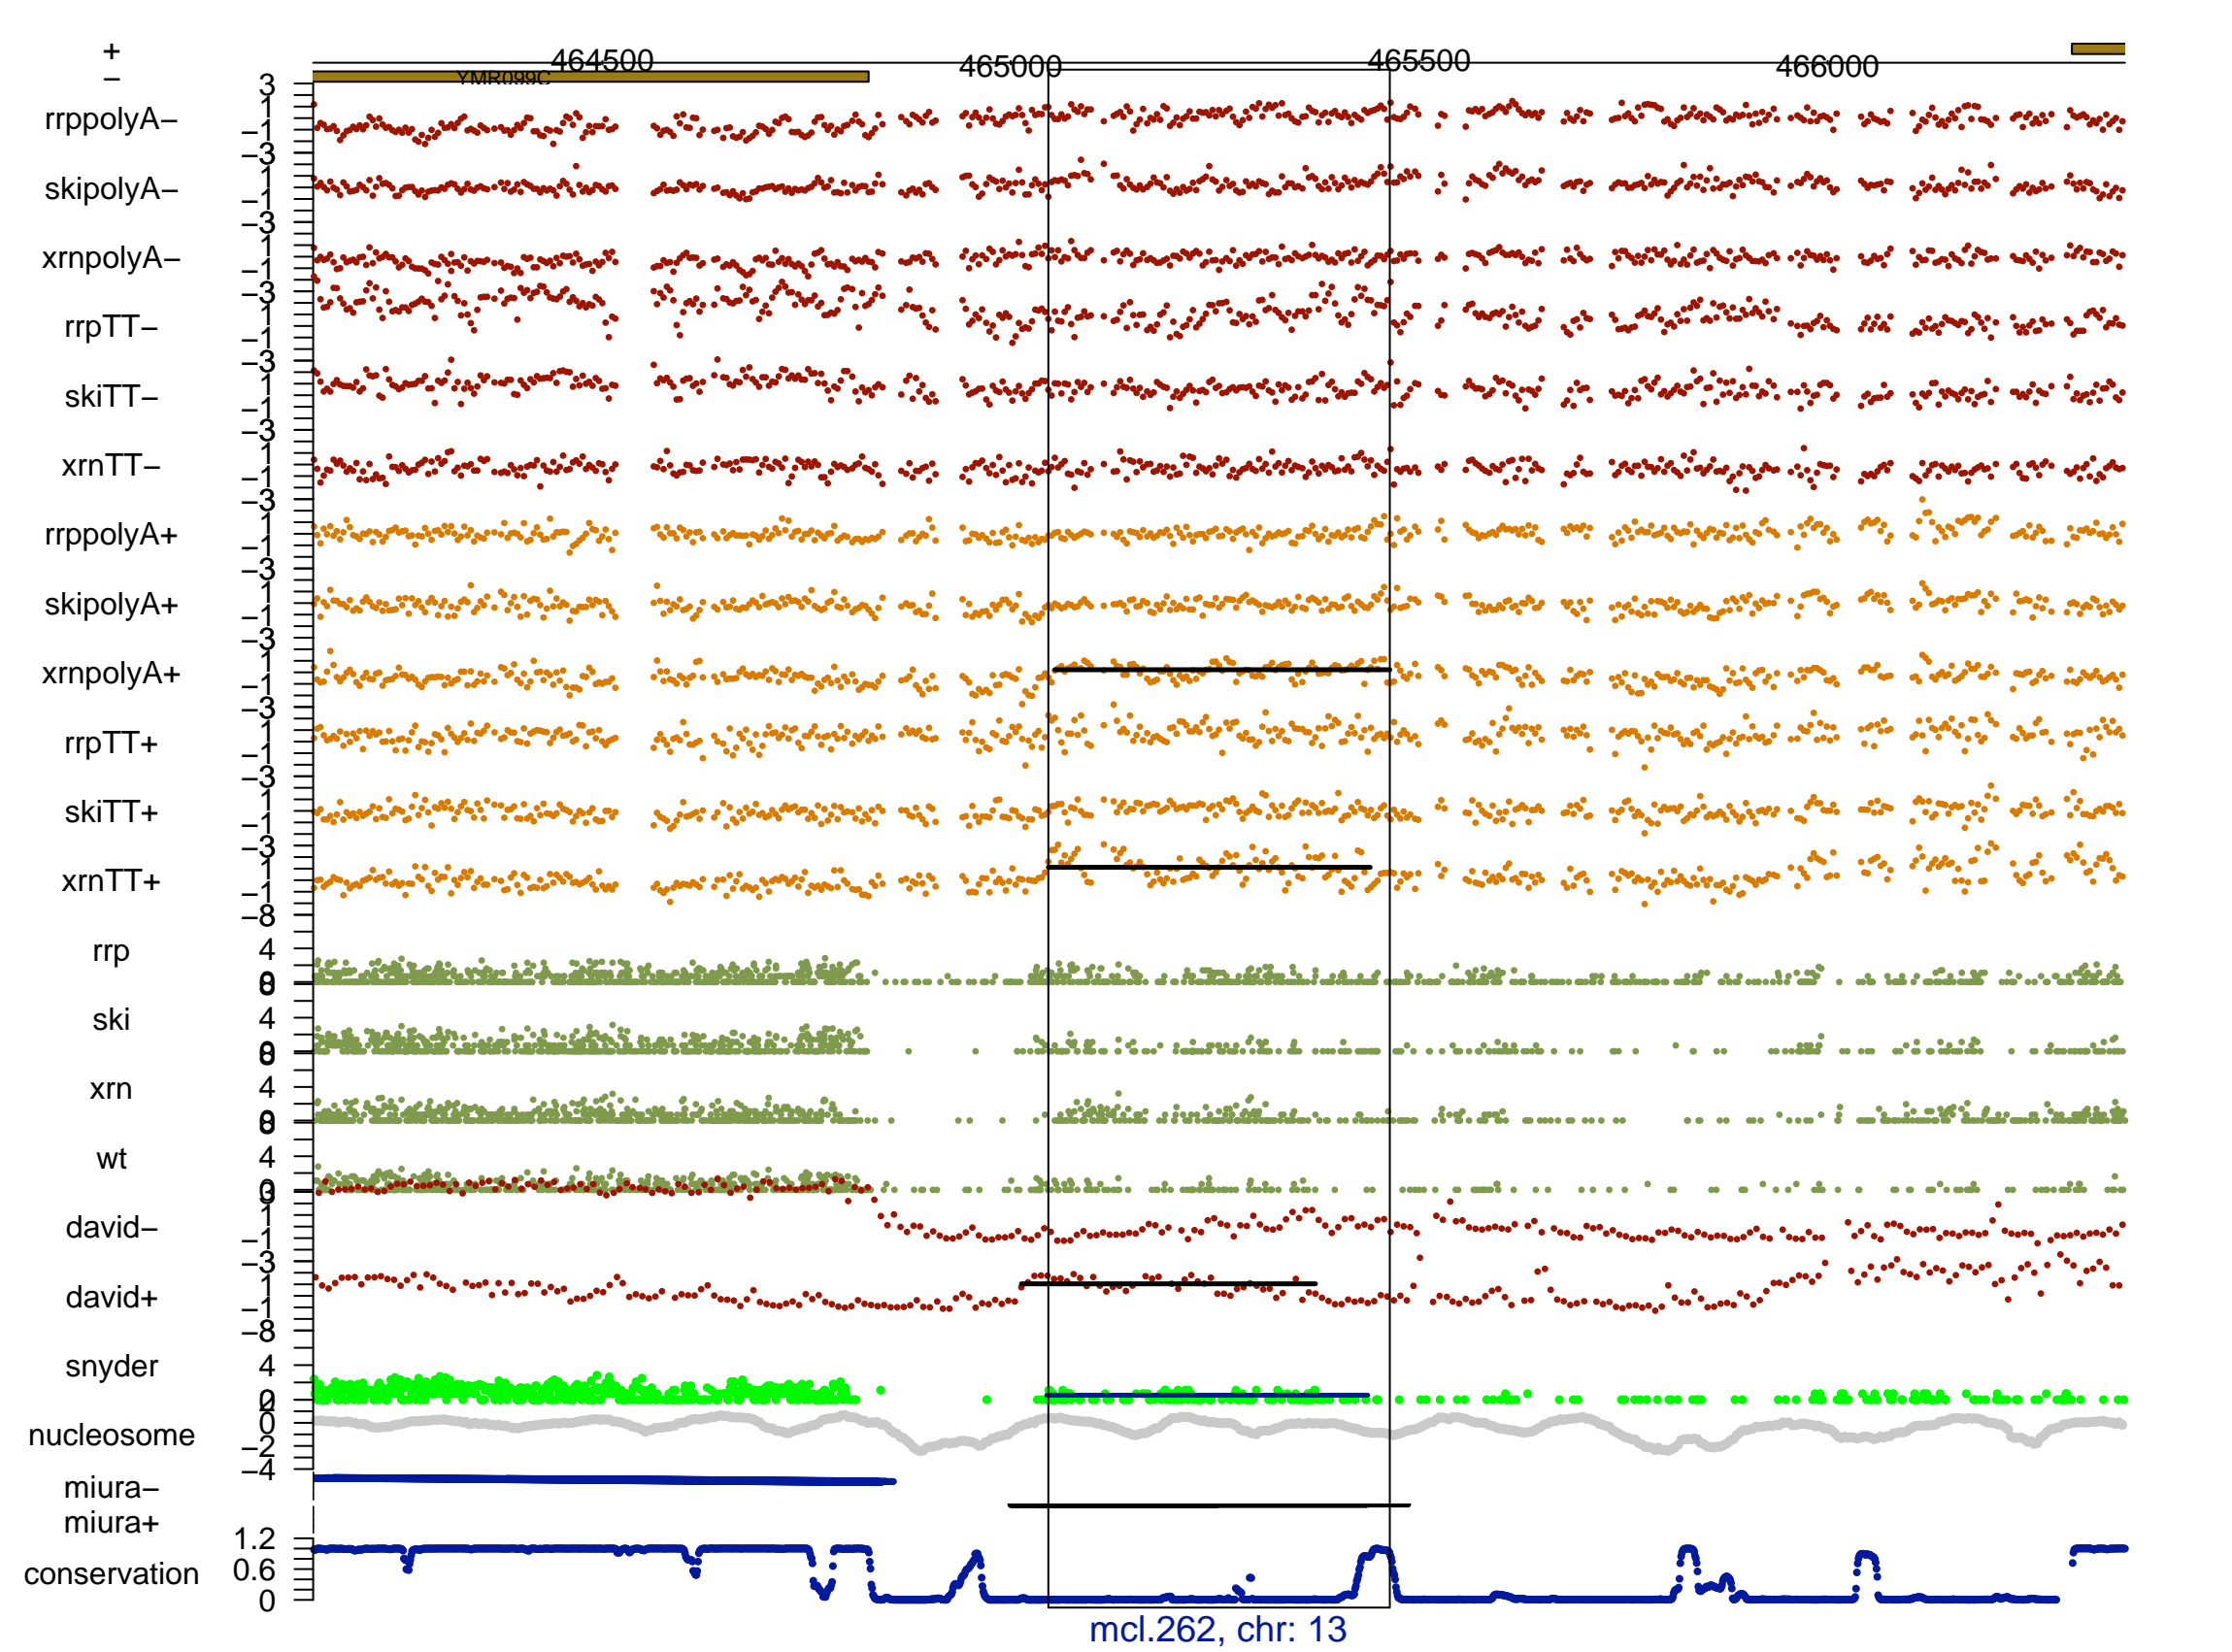



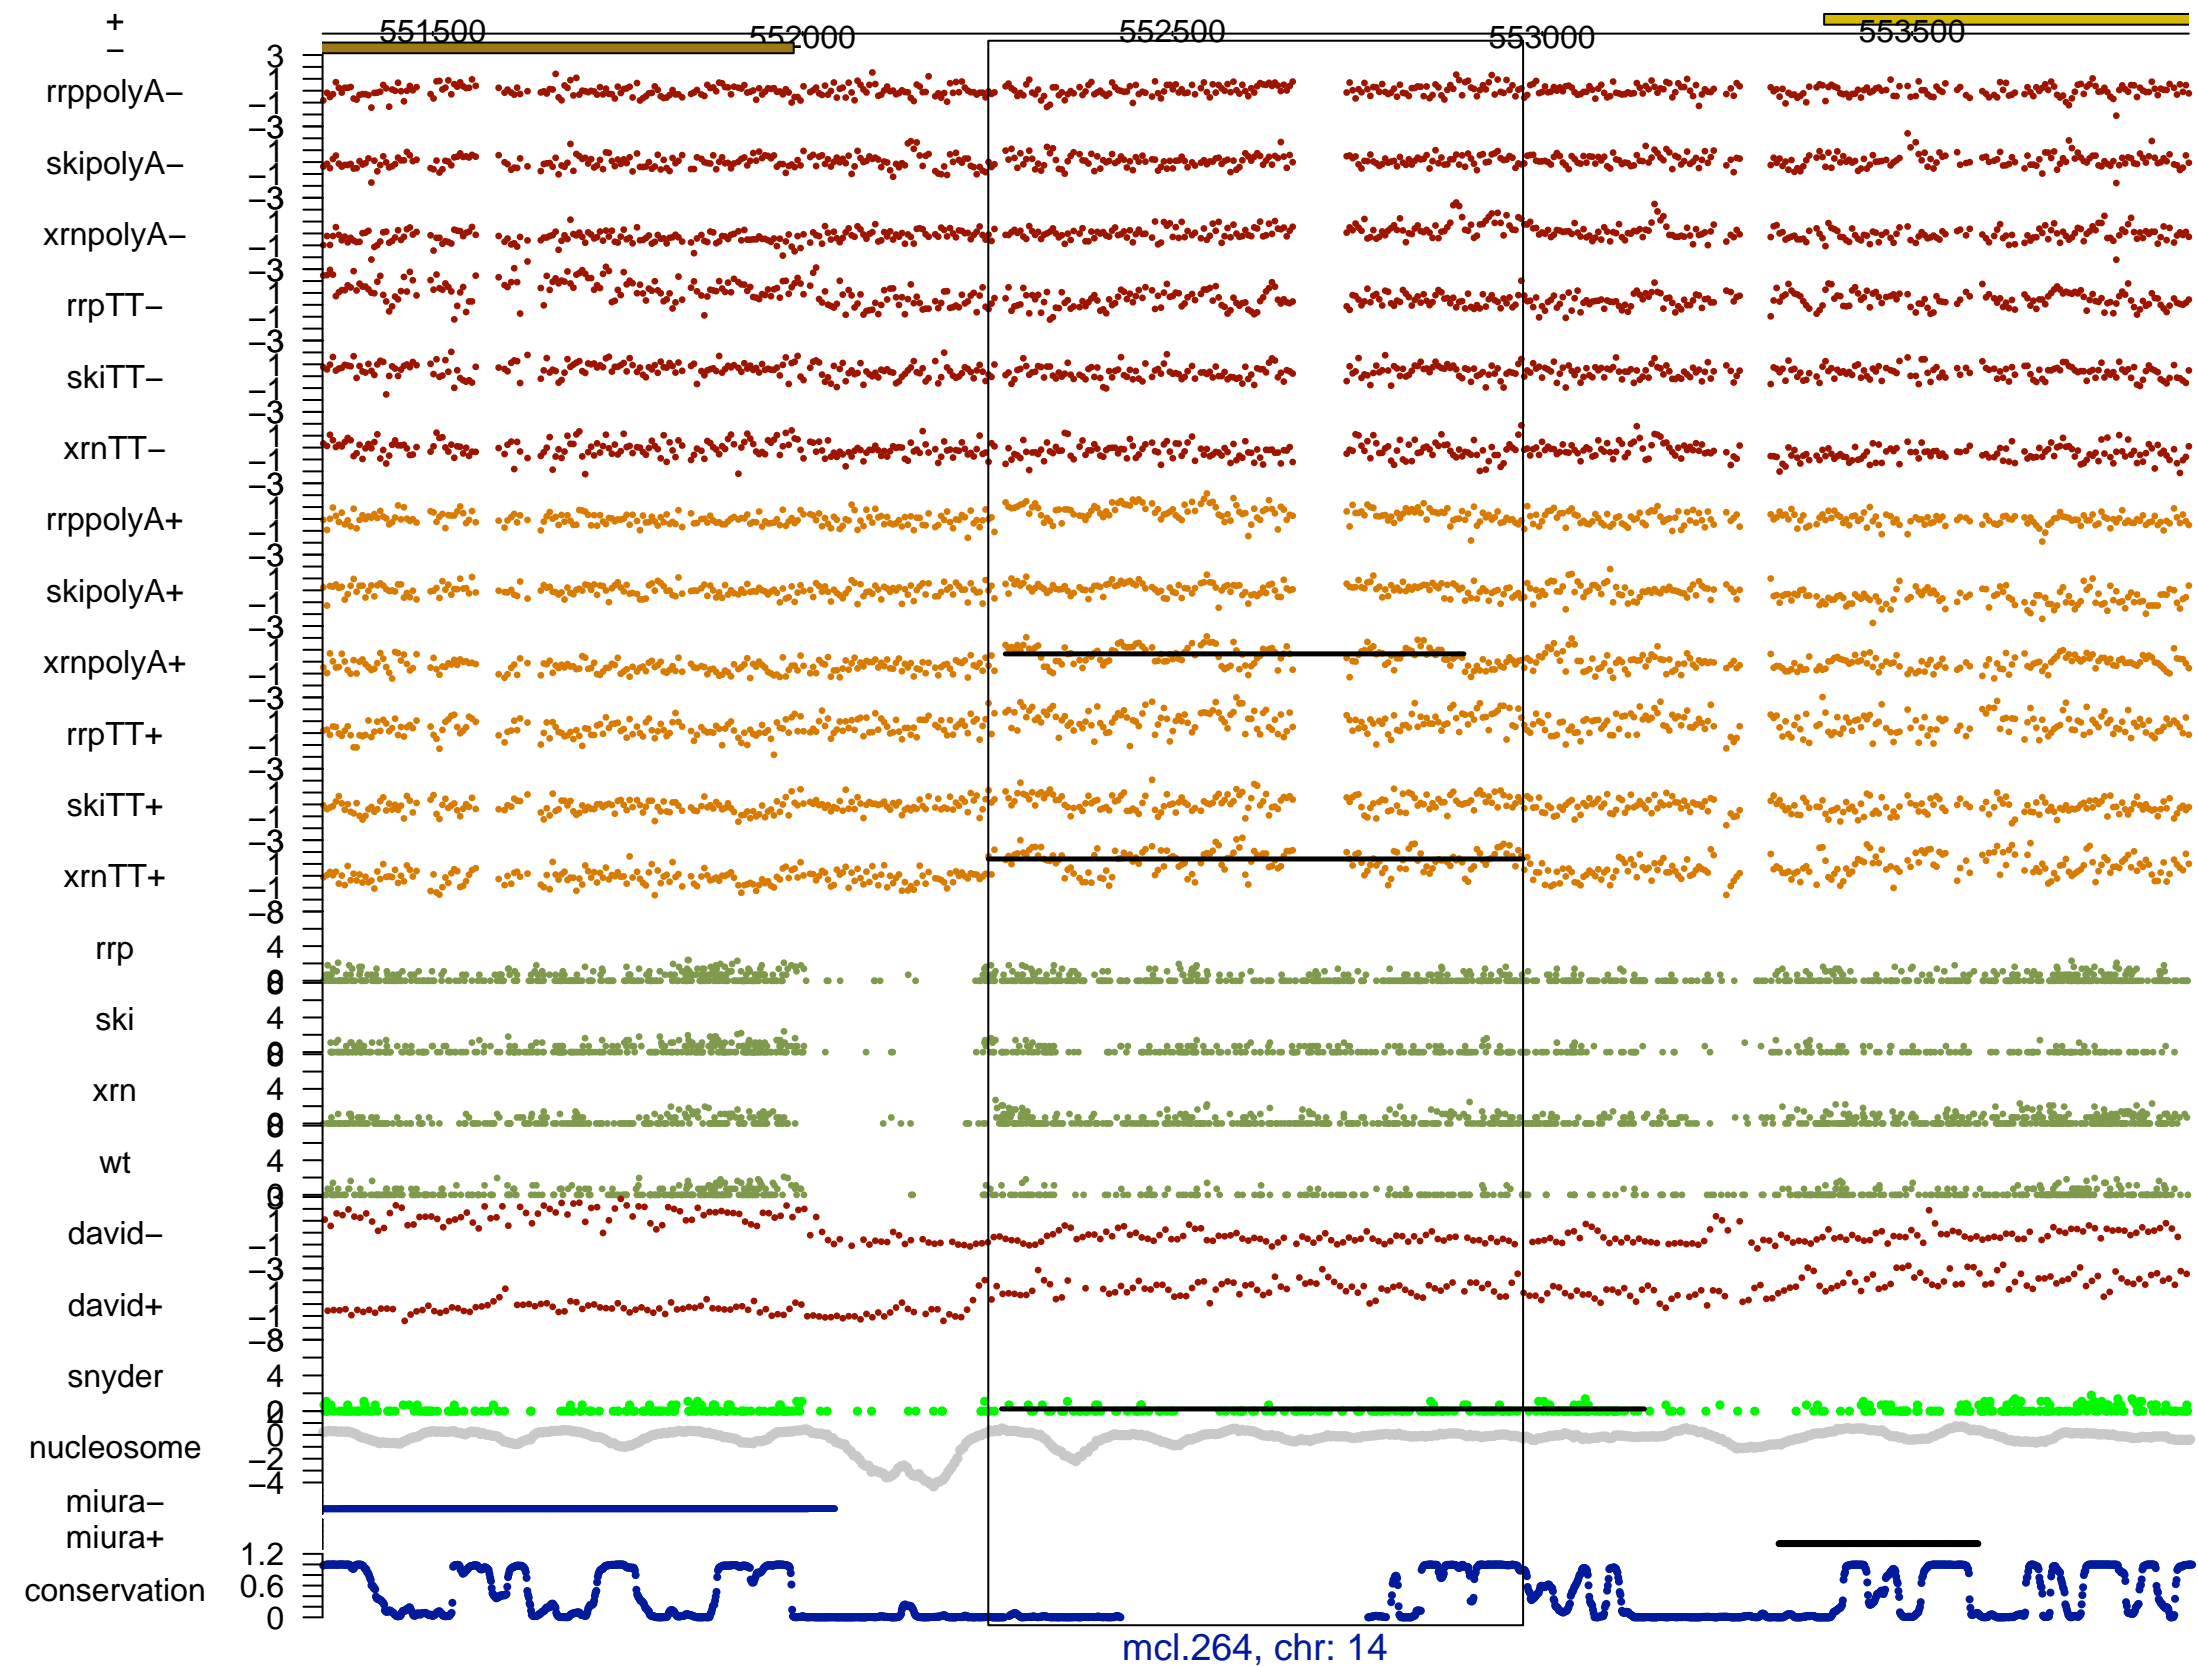

mcl.264, chr: 14

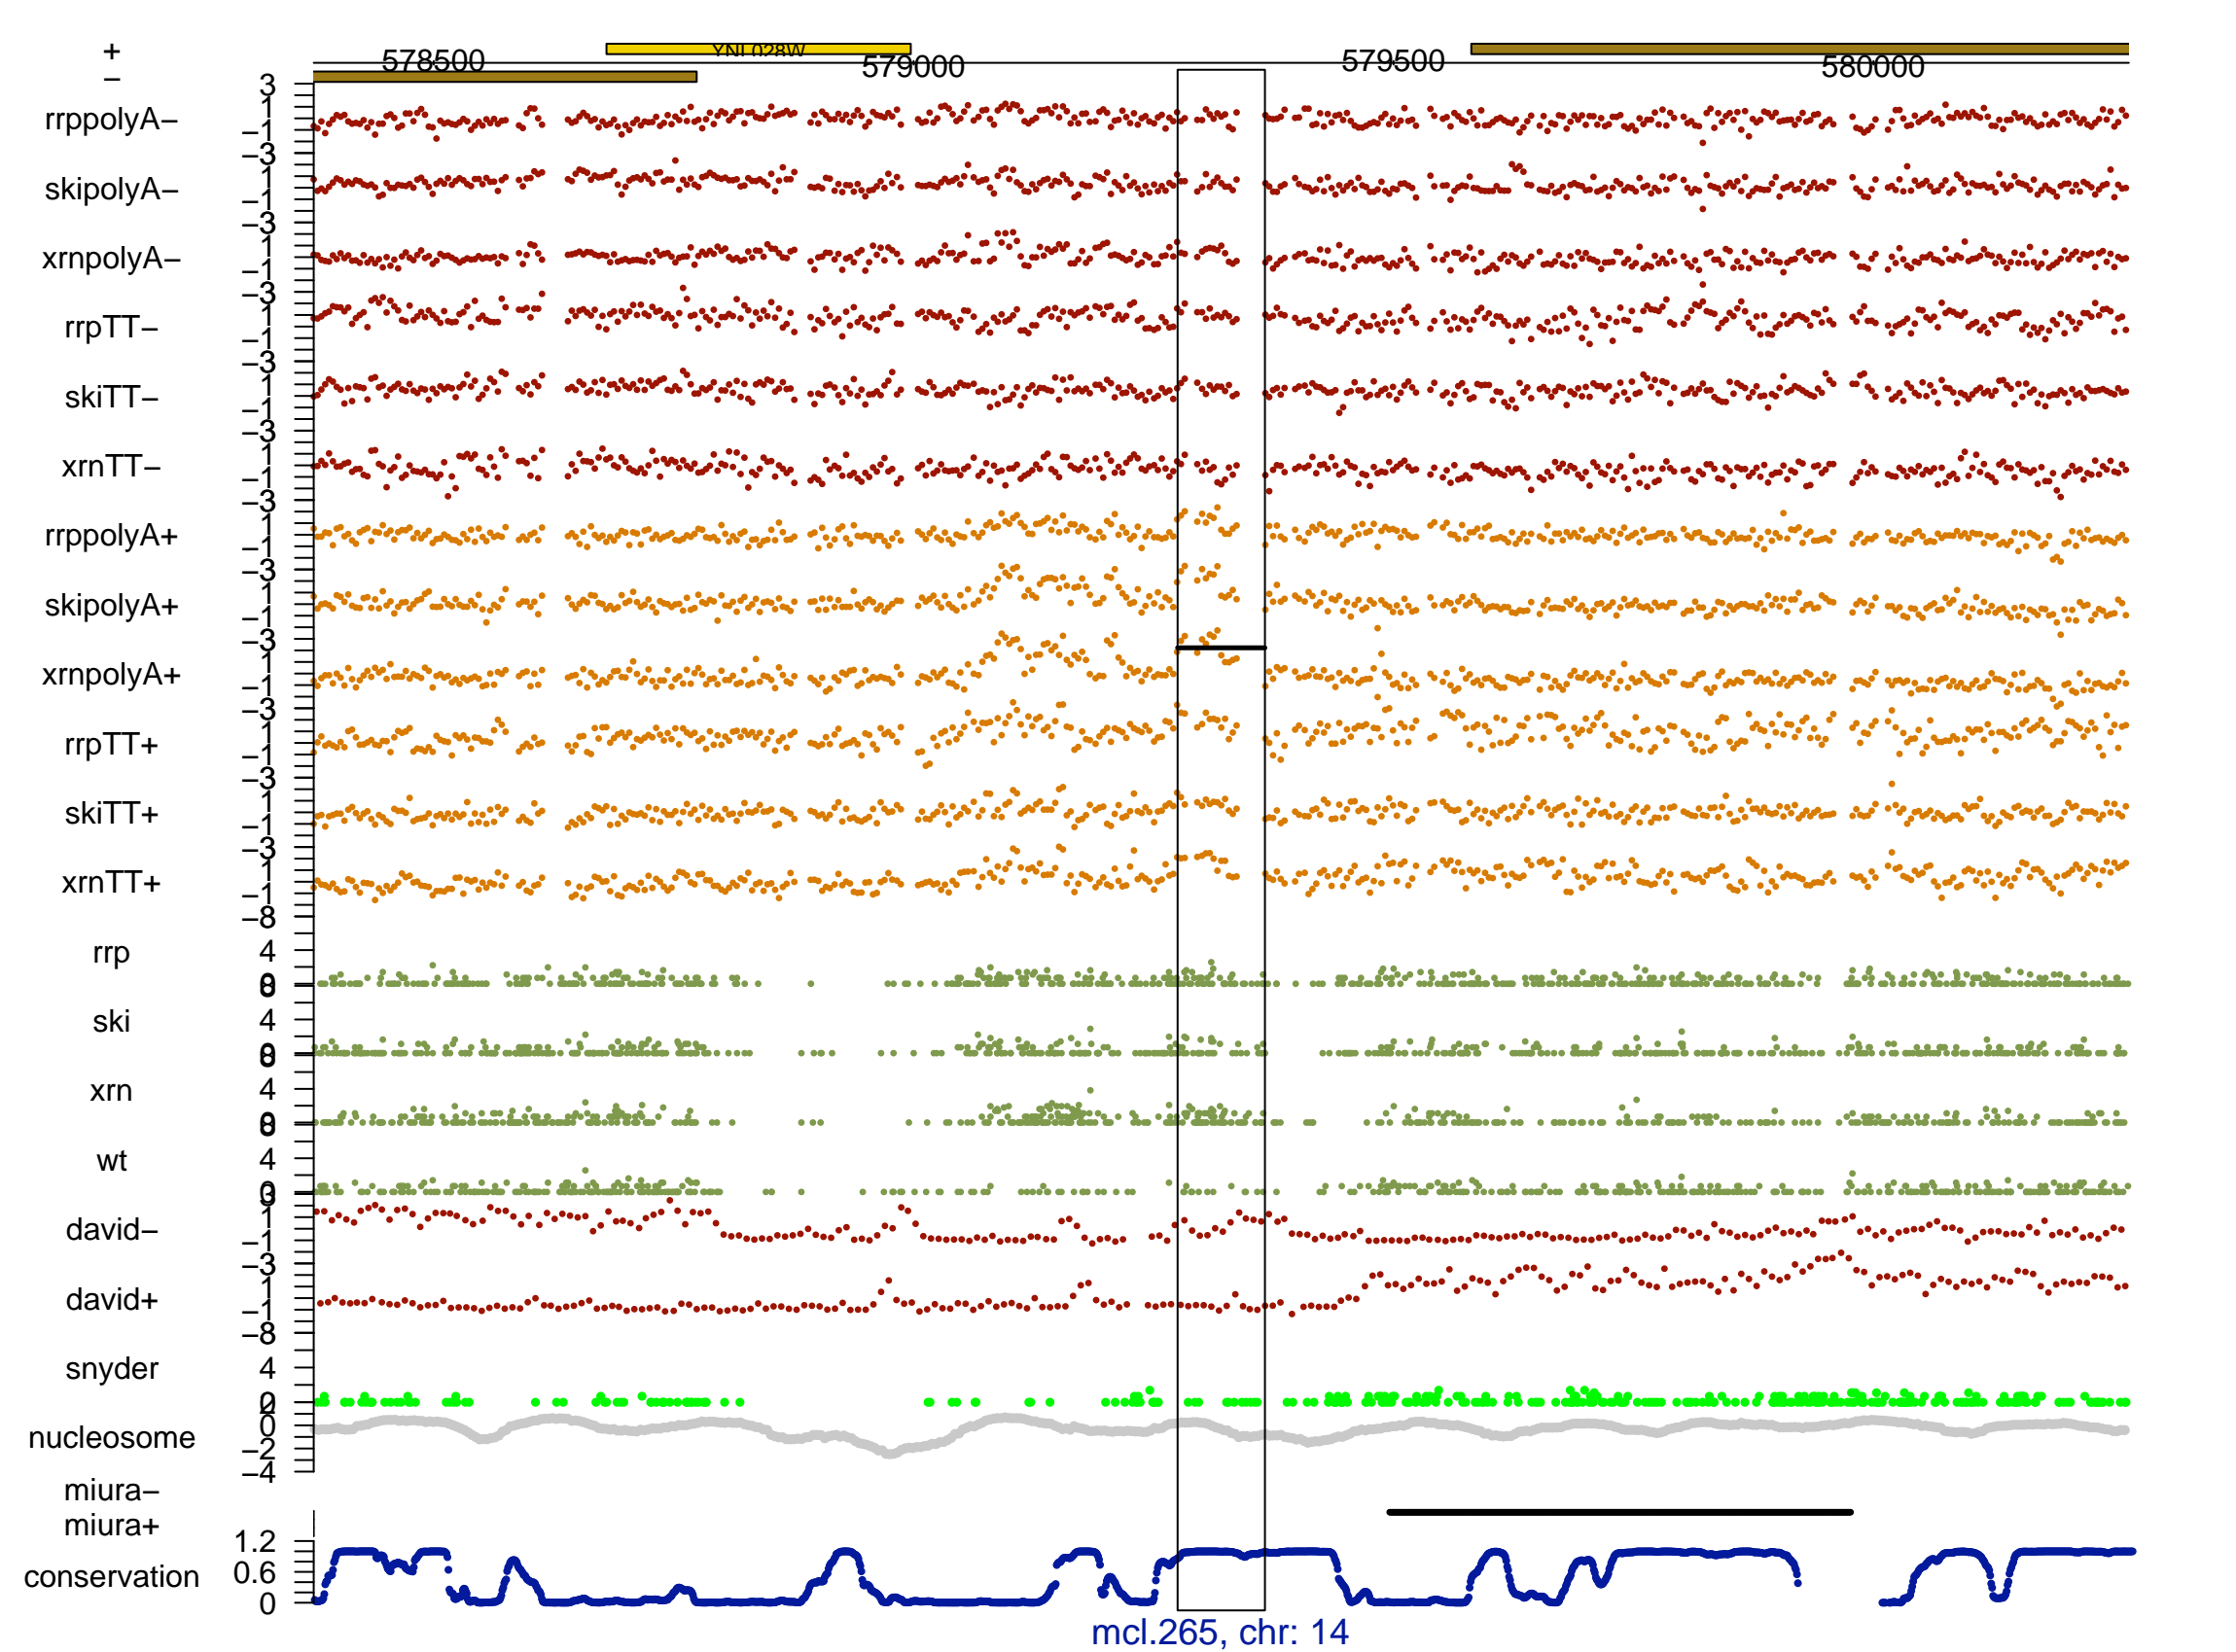





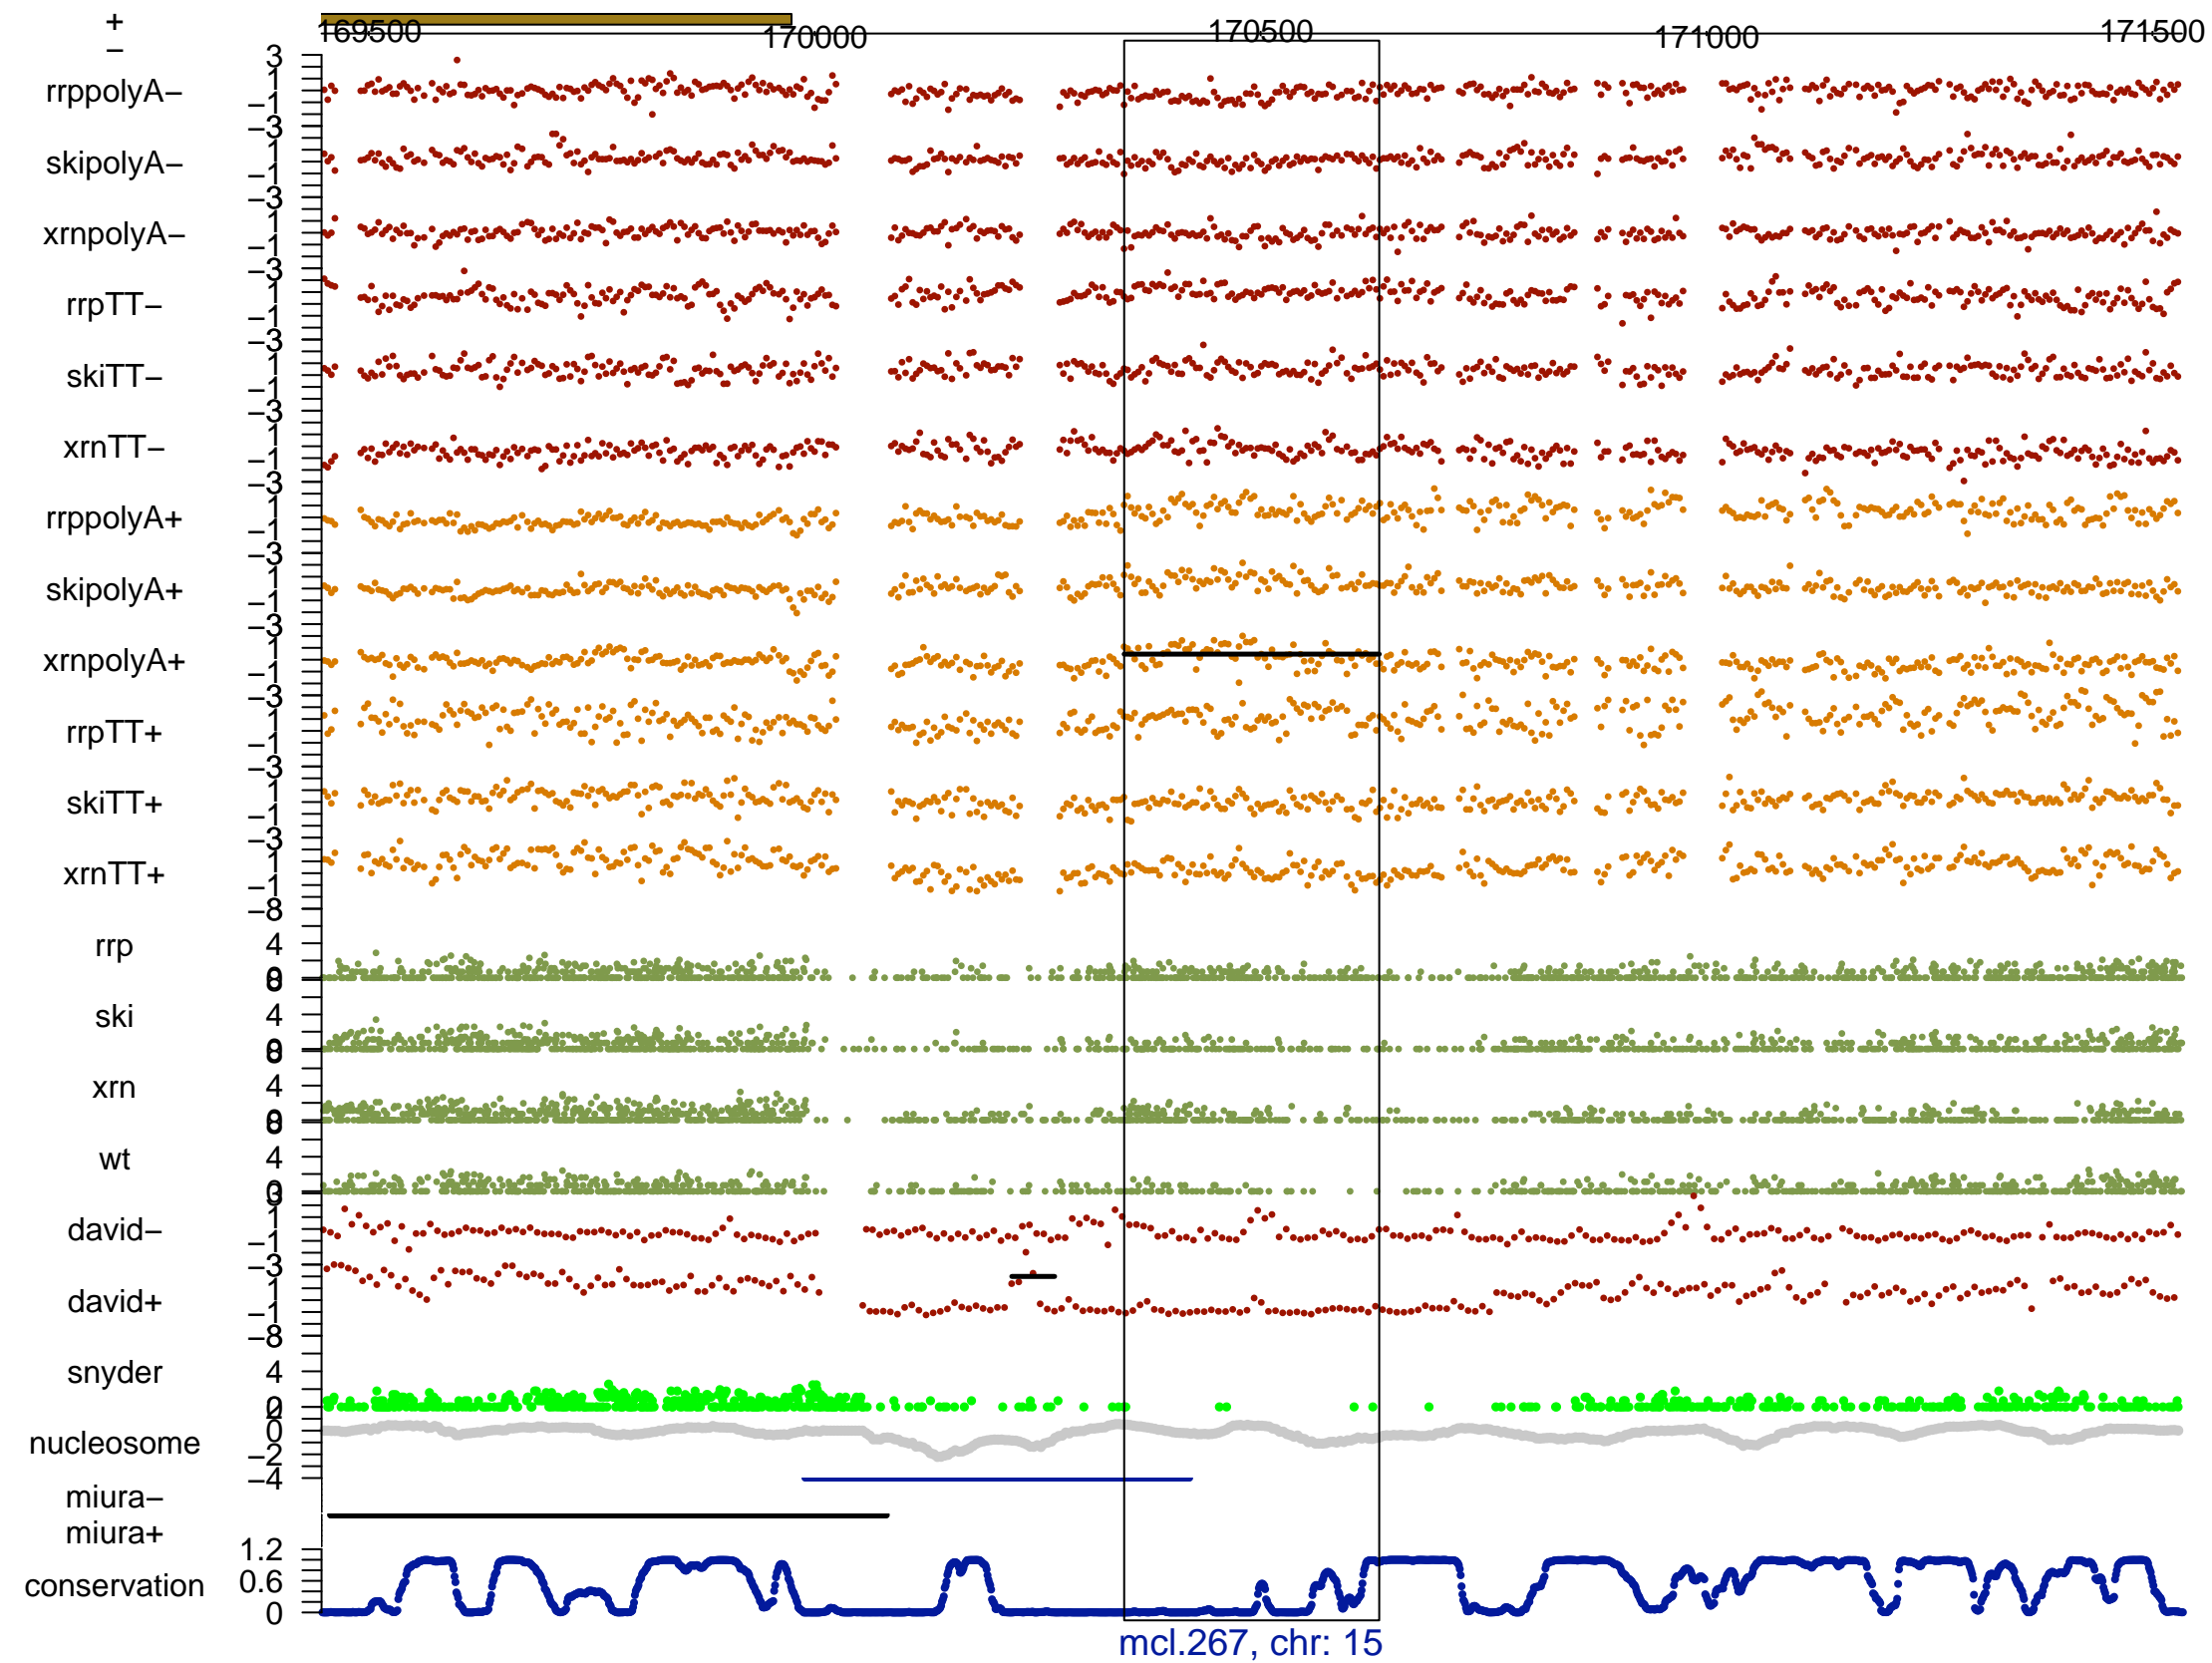

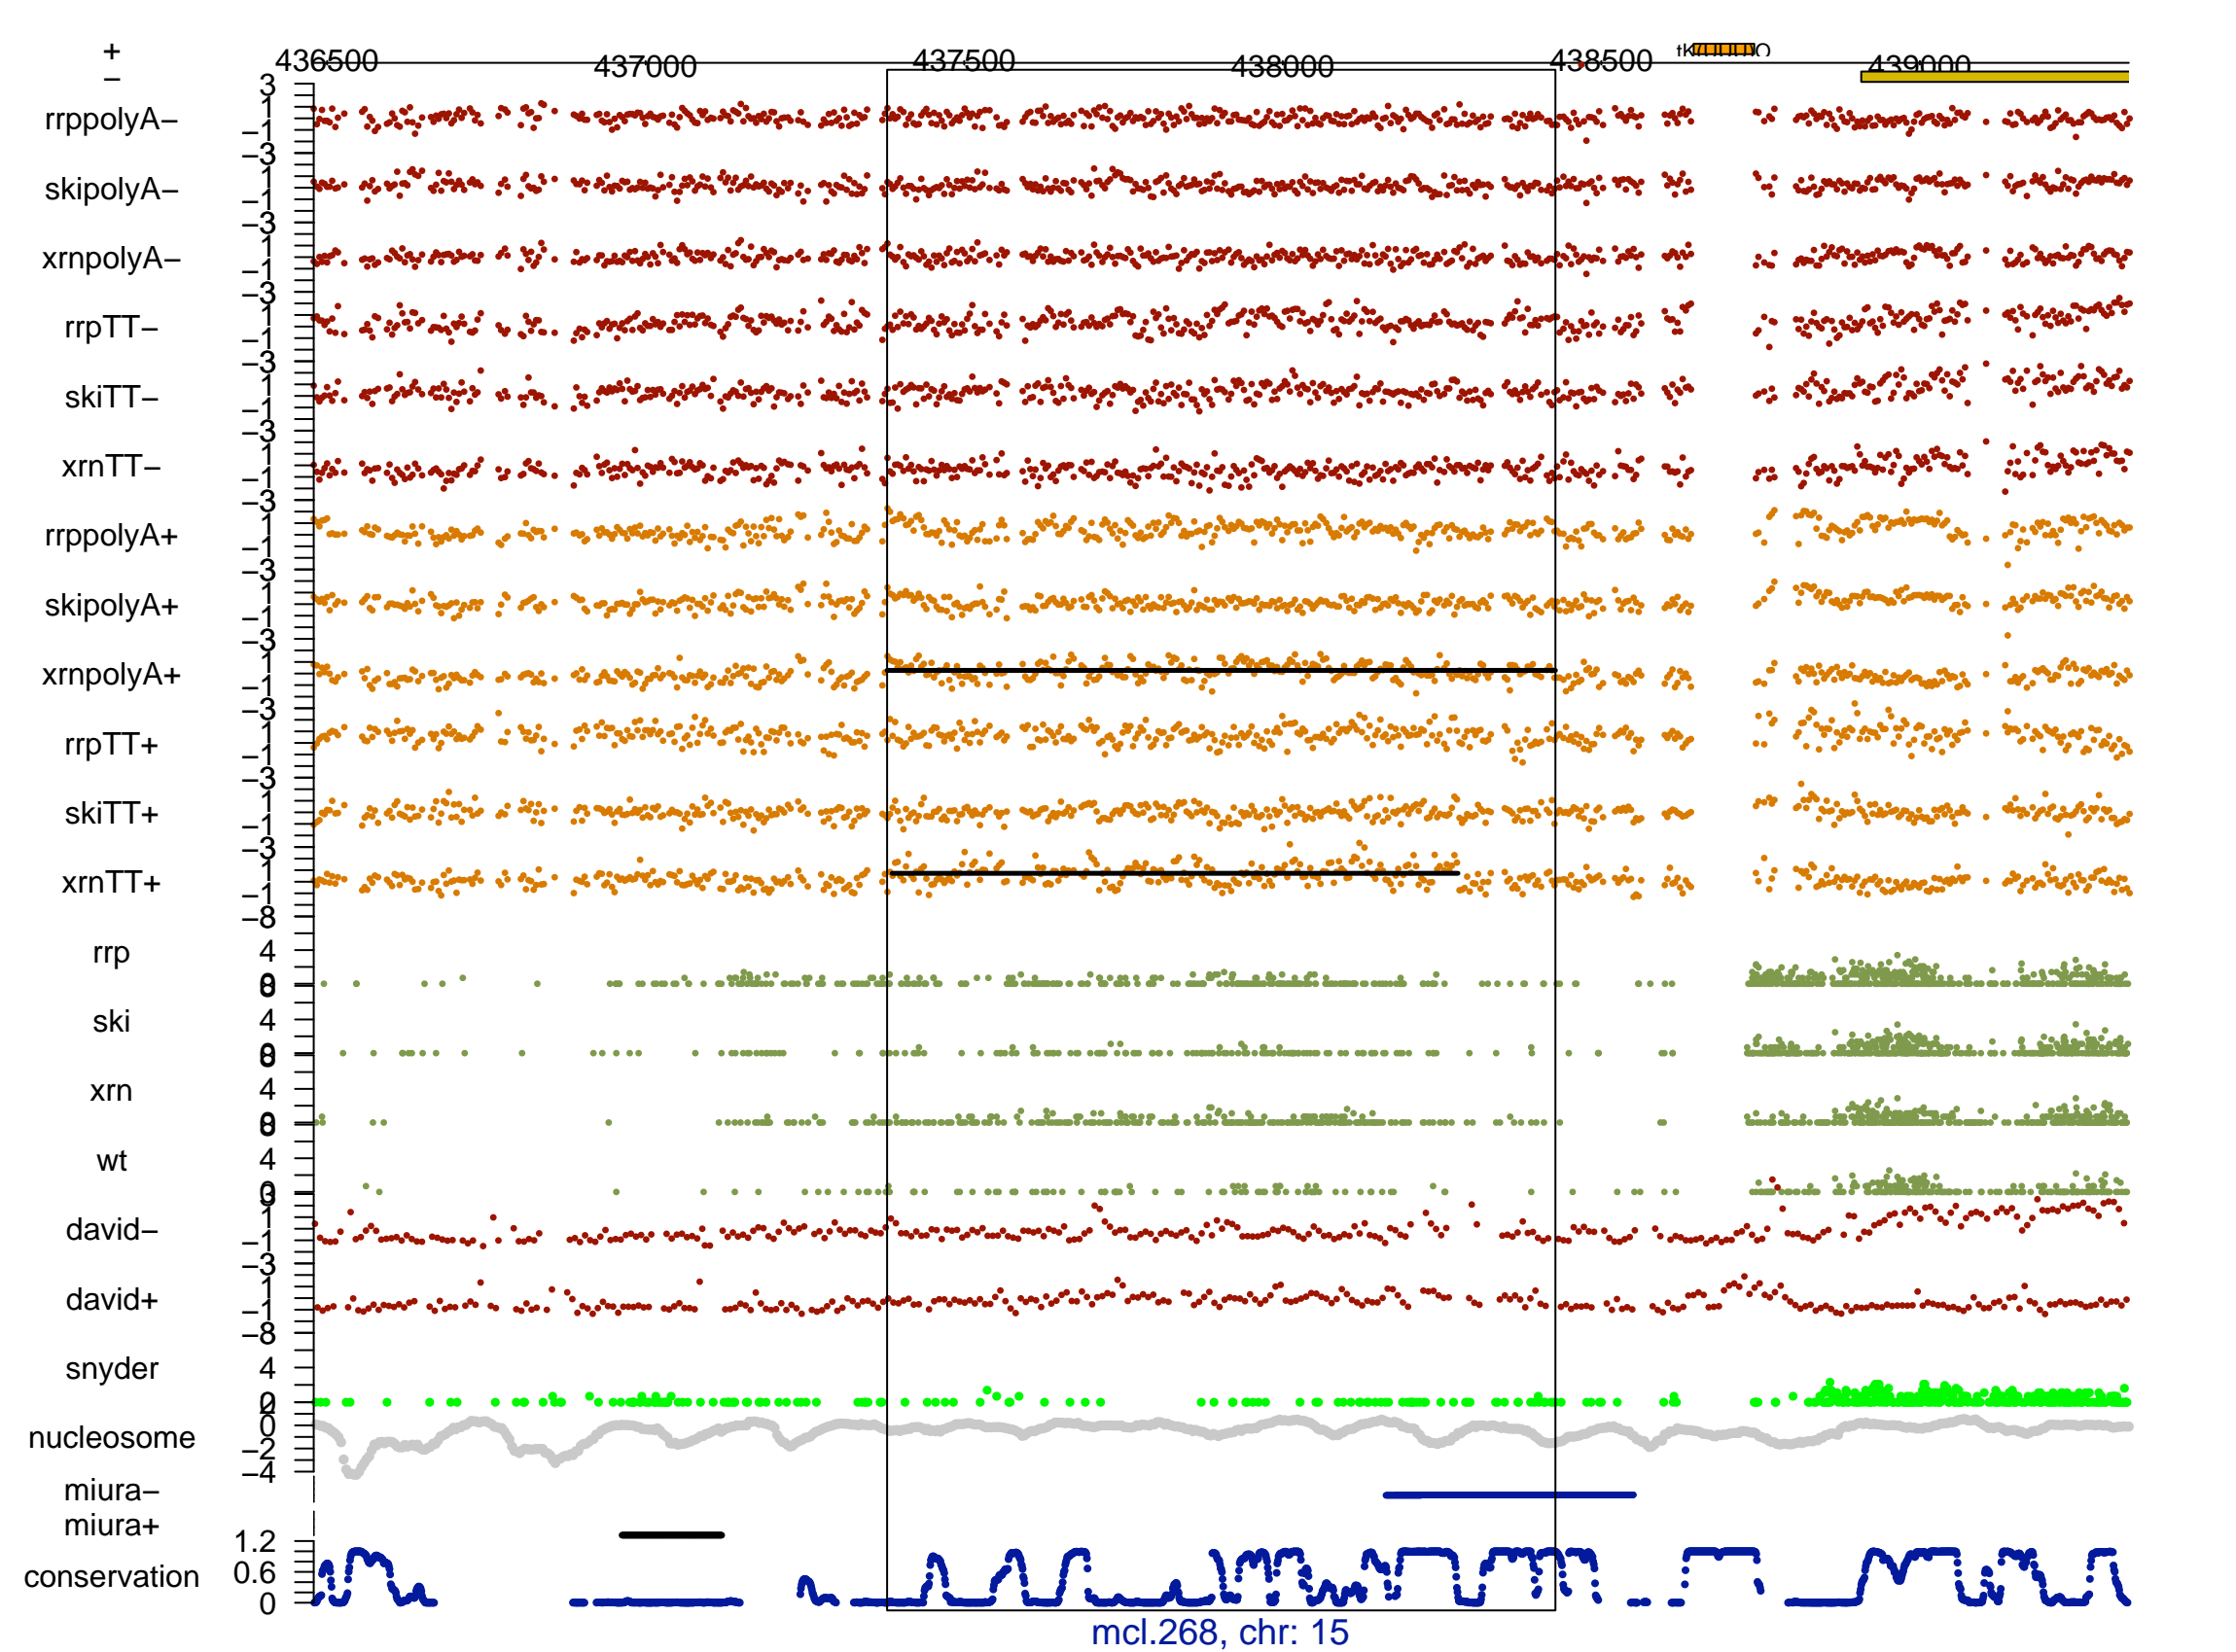

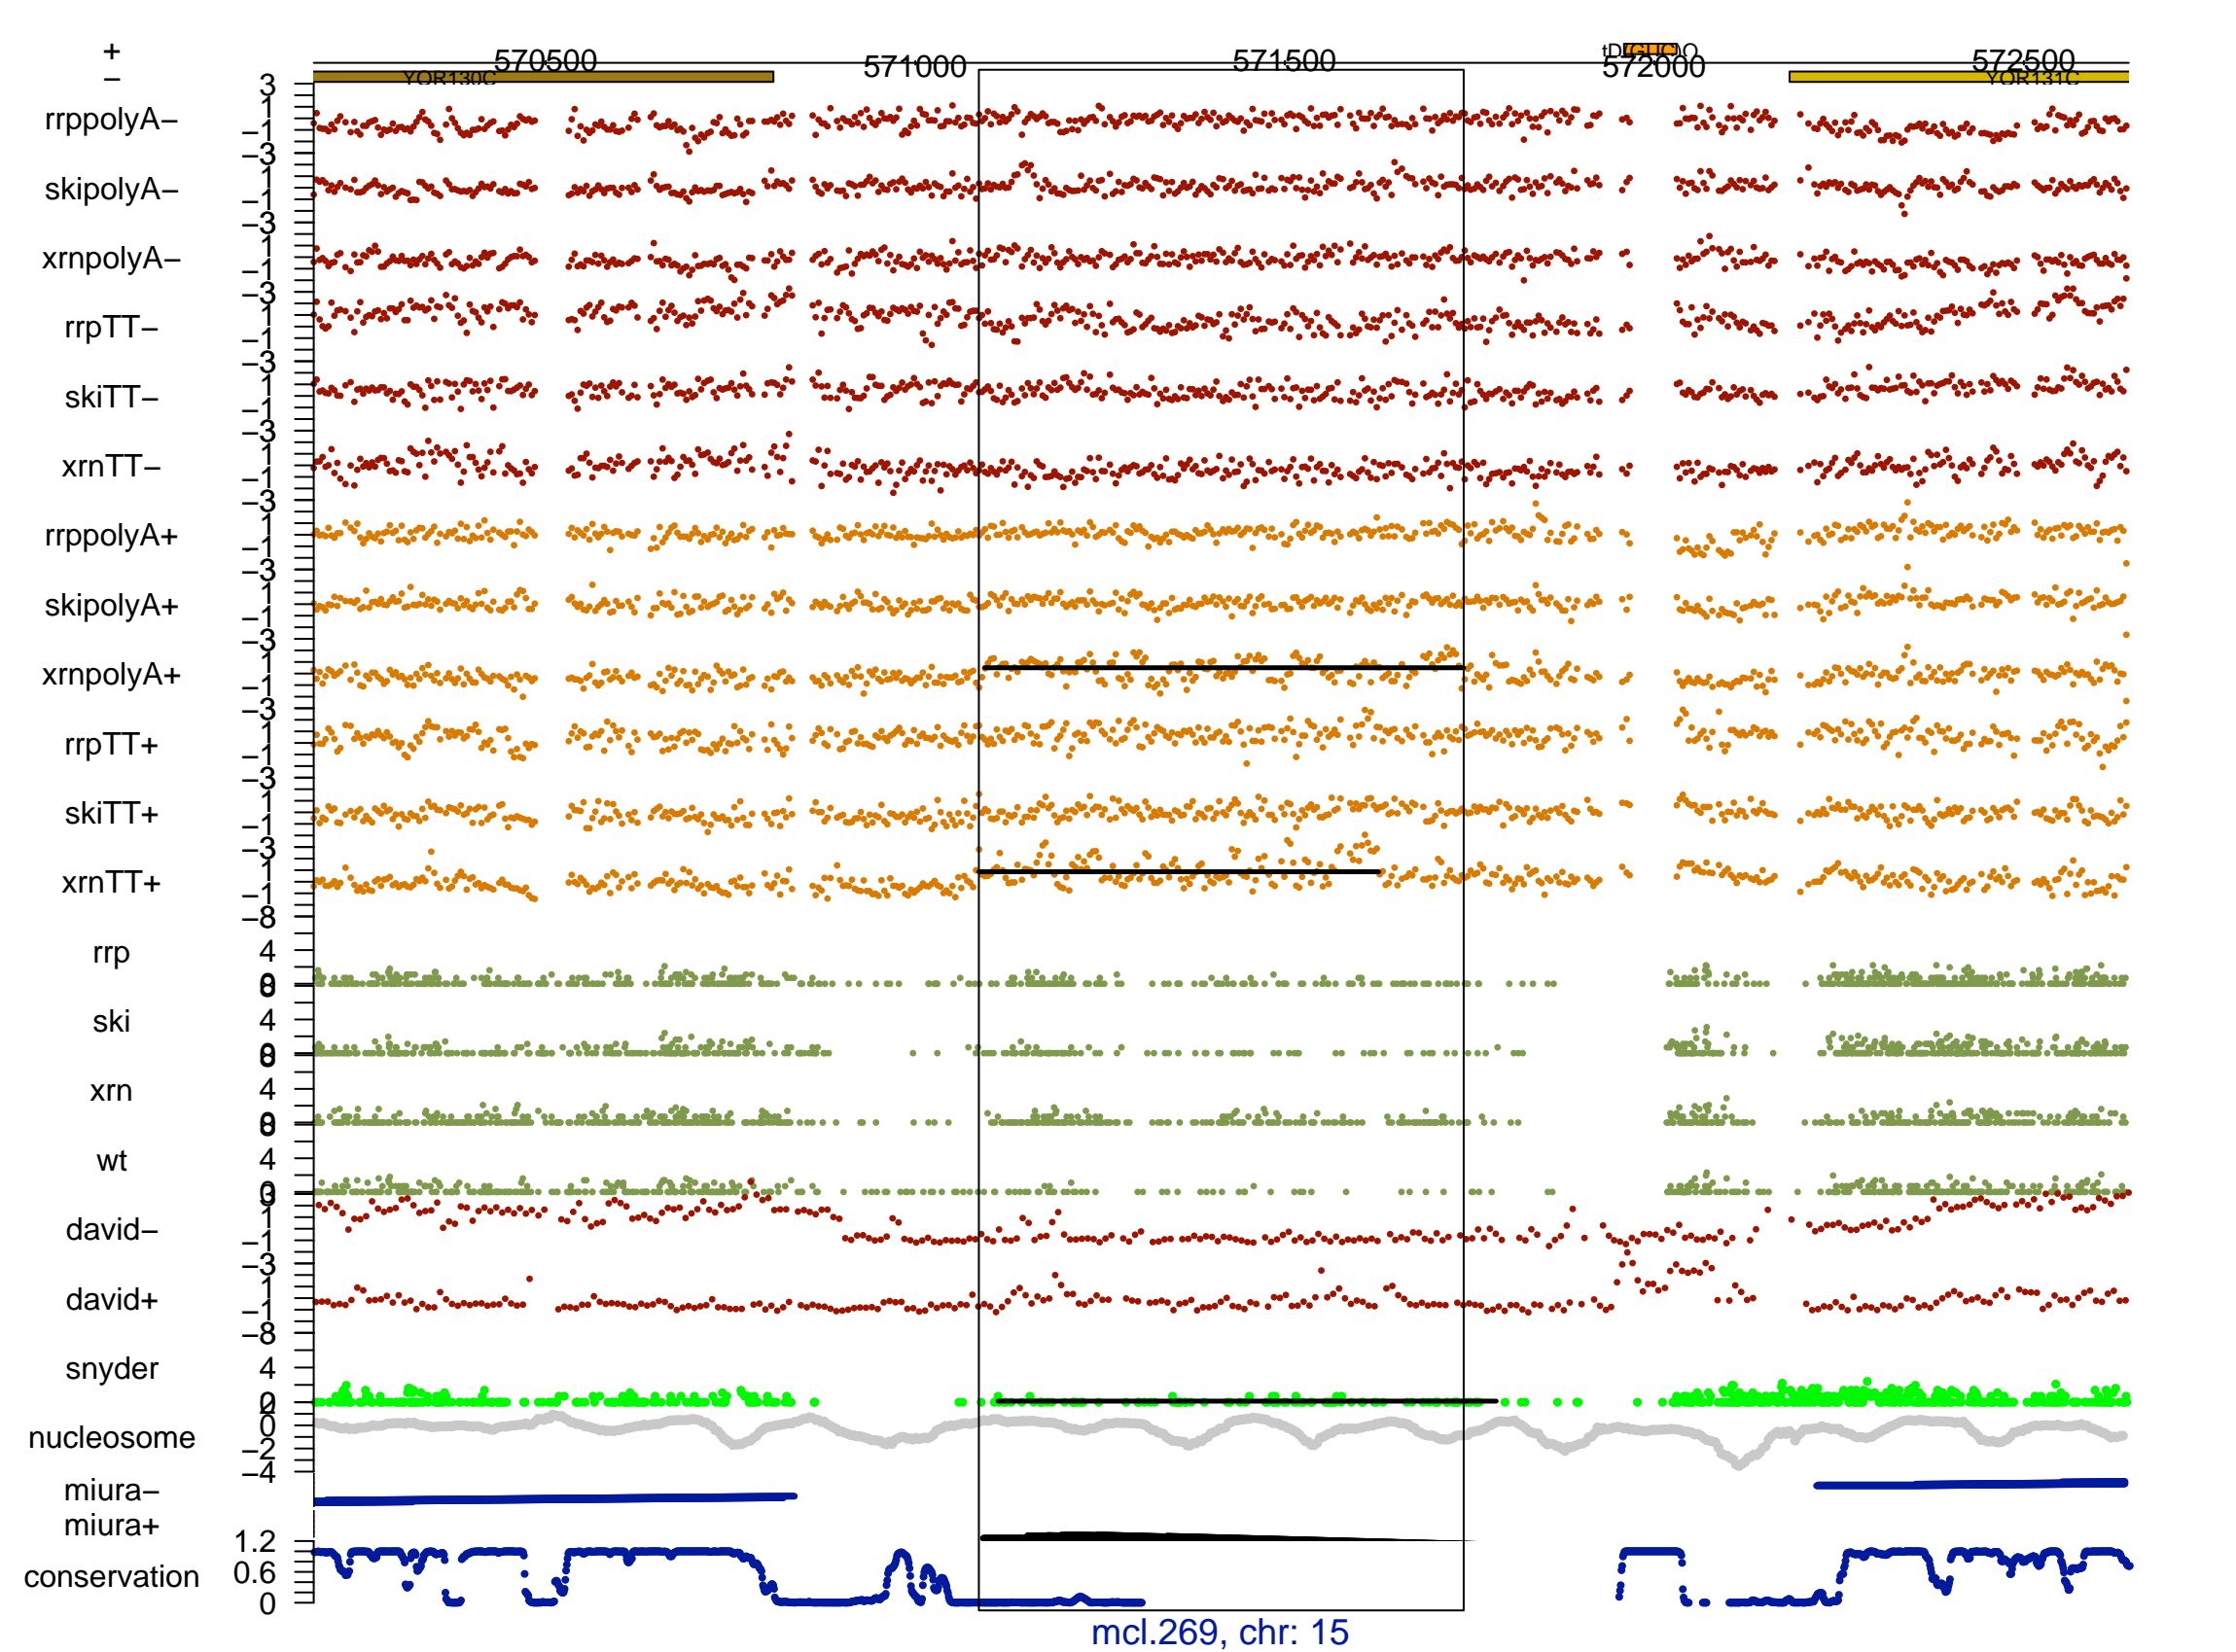



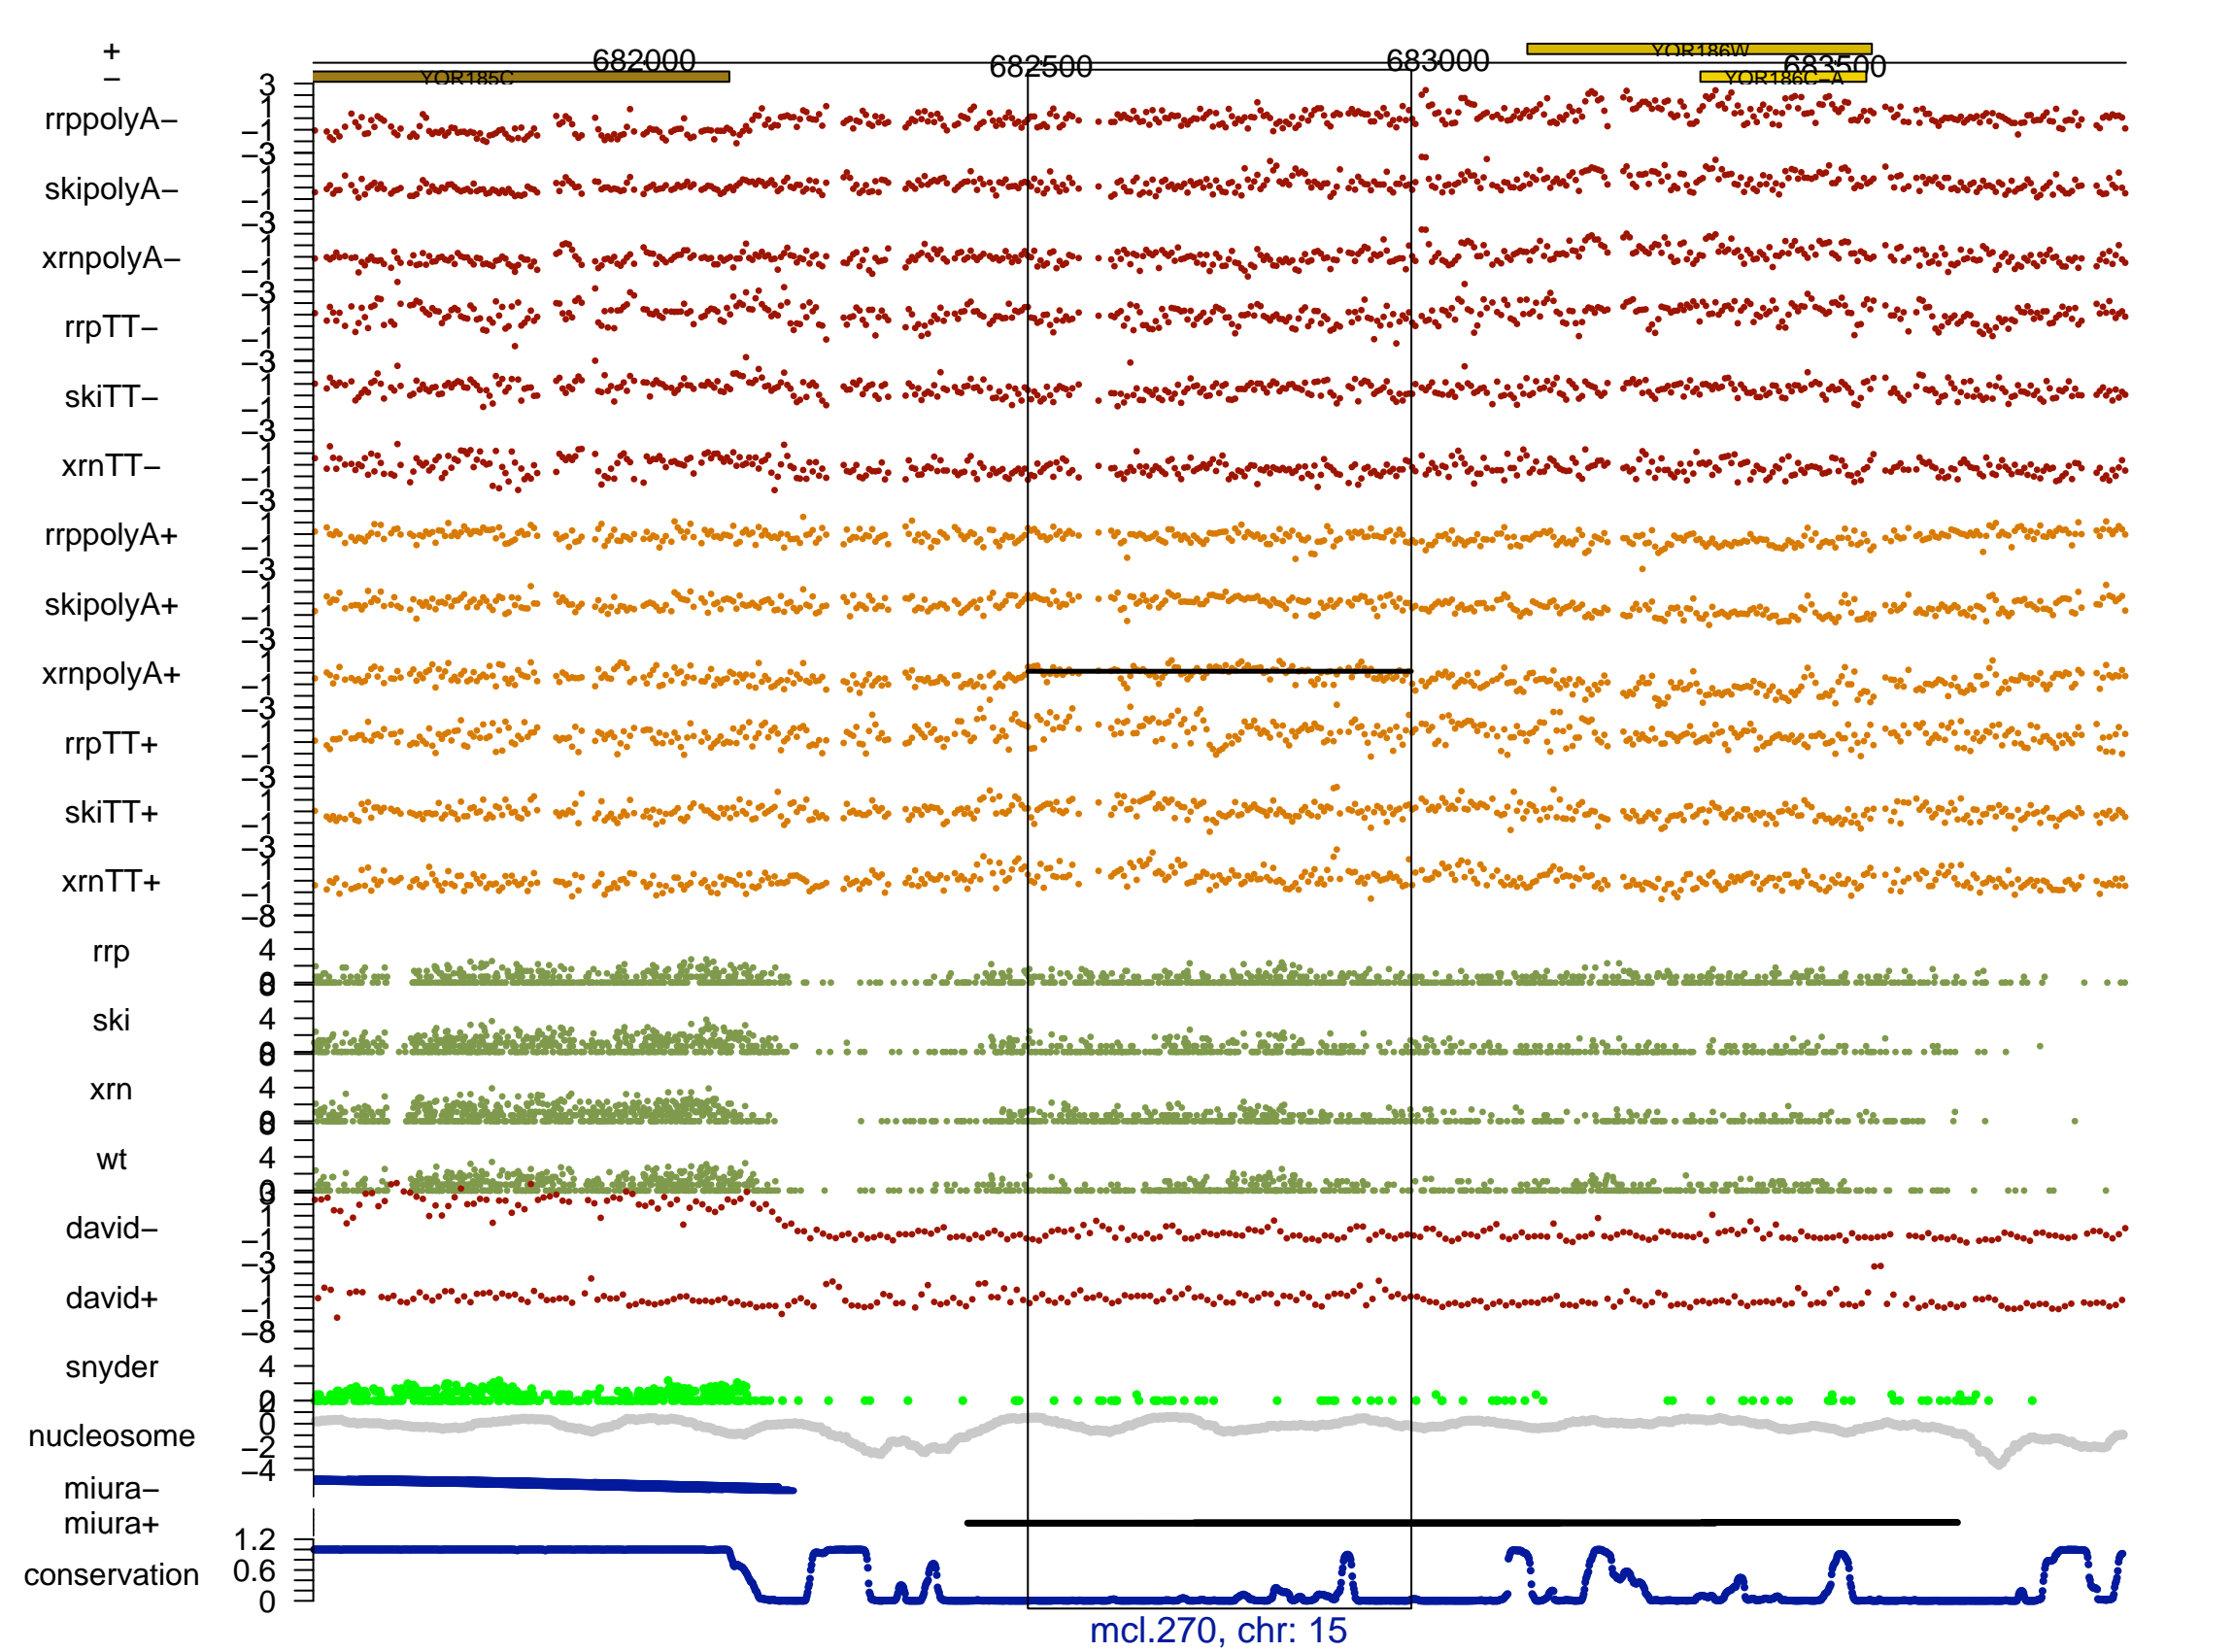

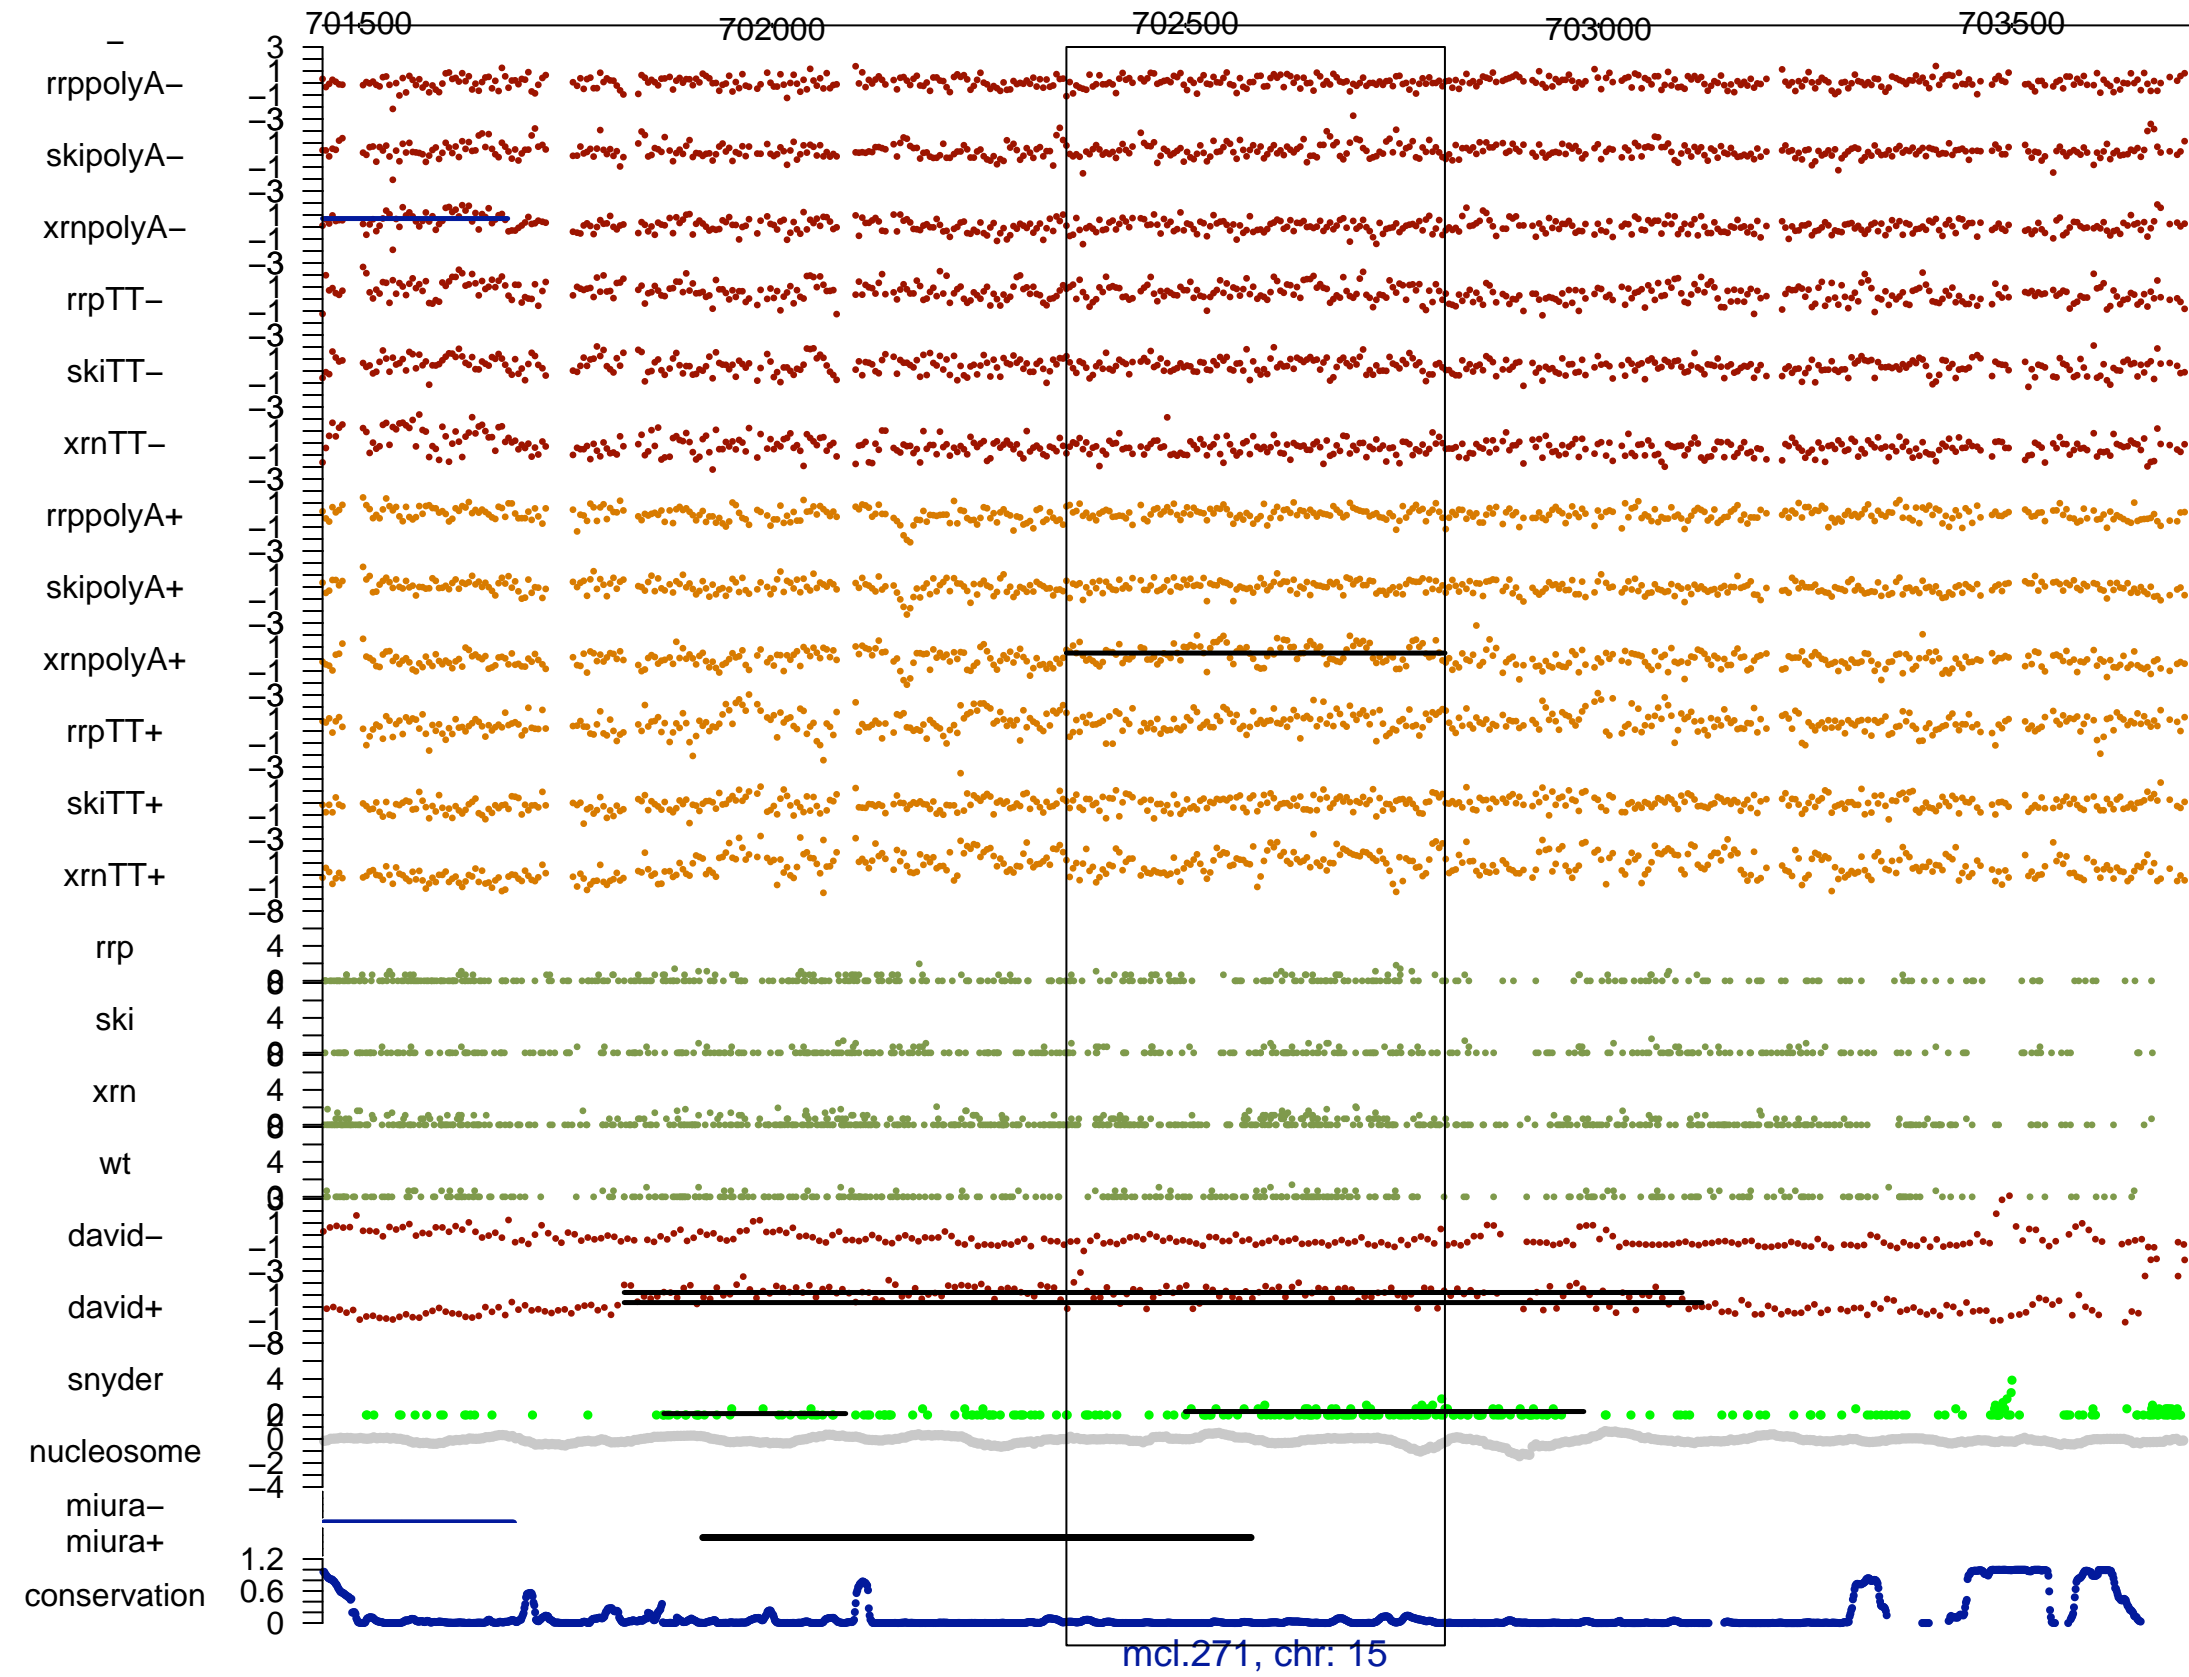









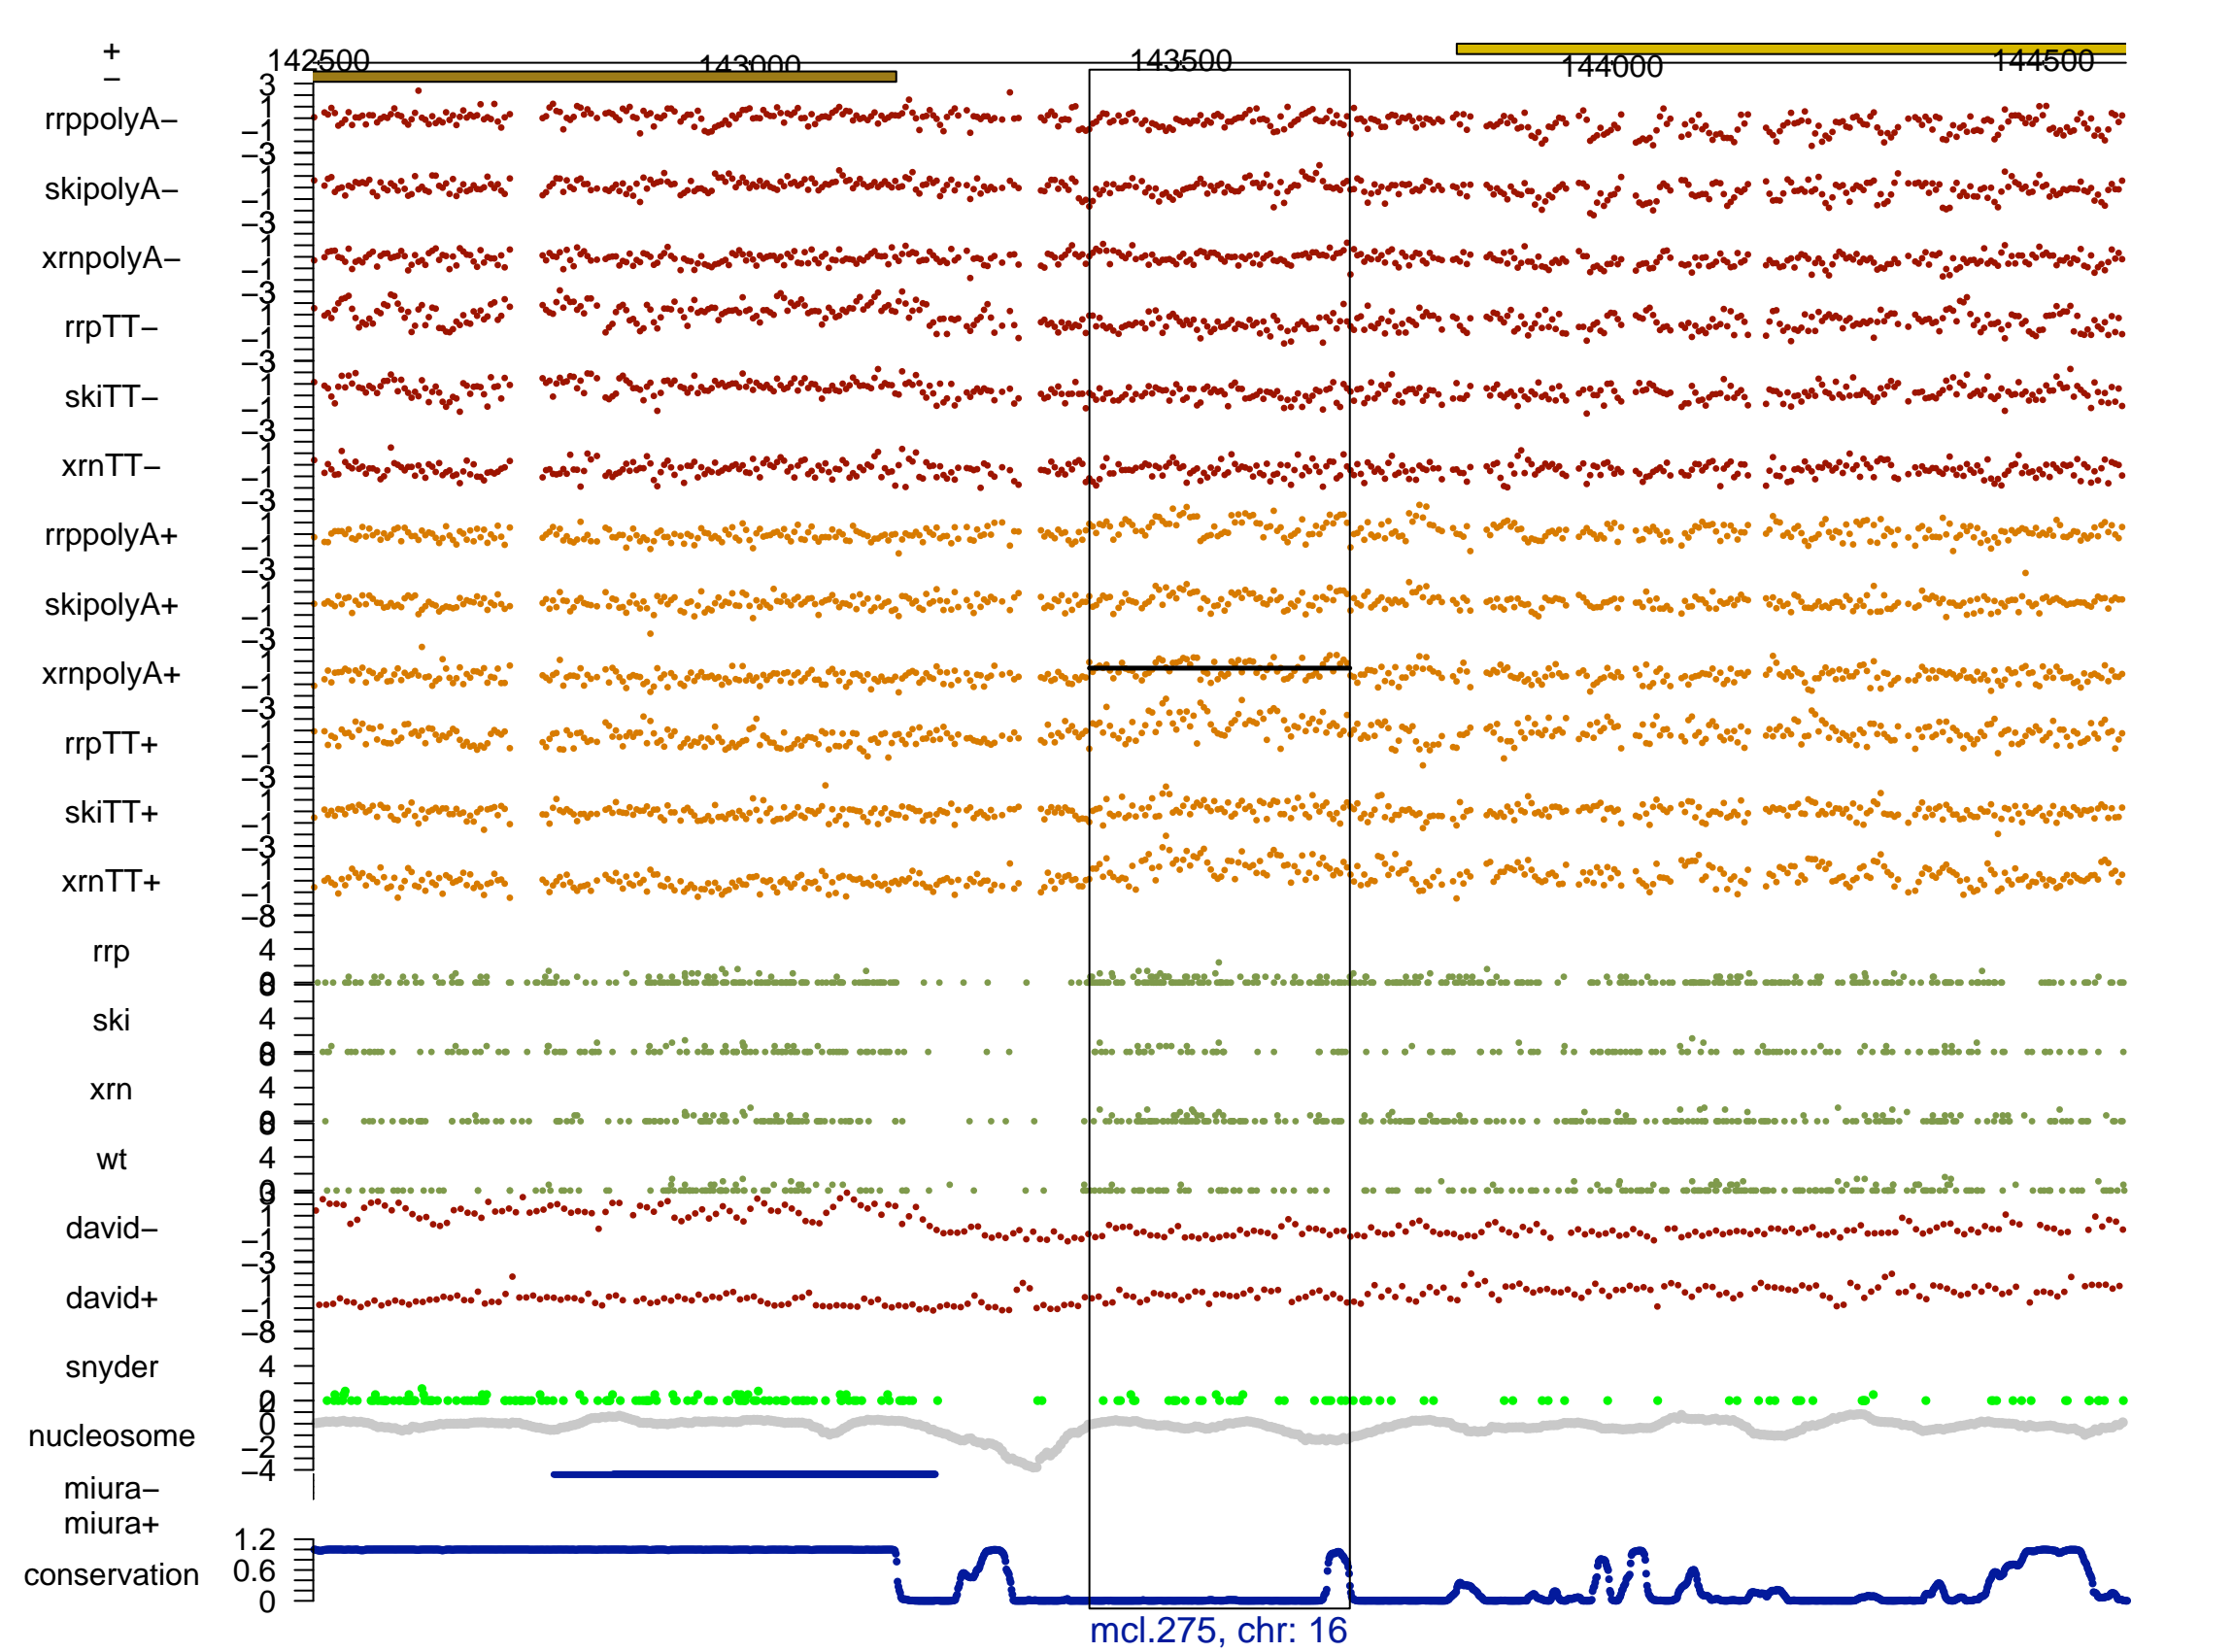

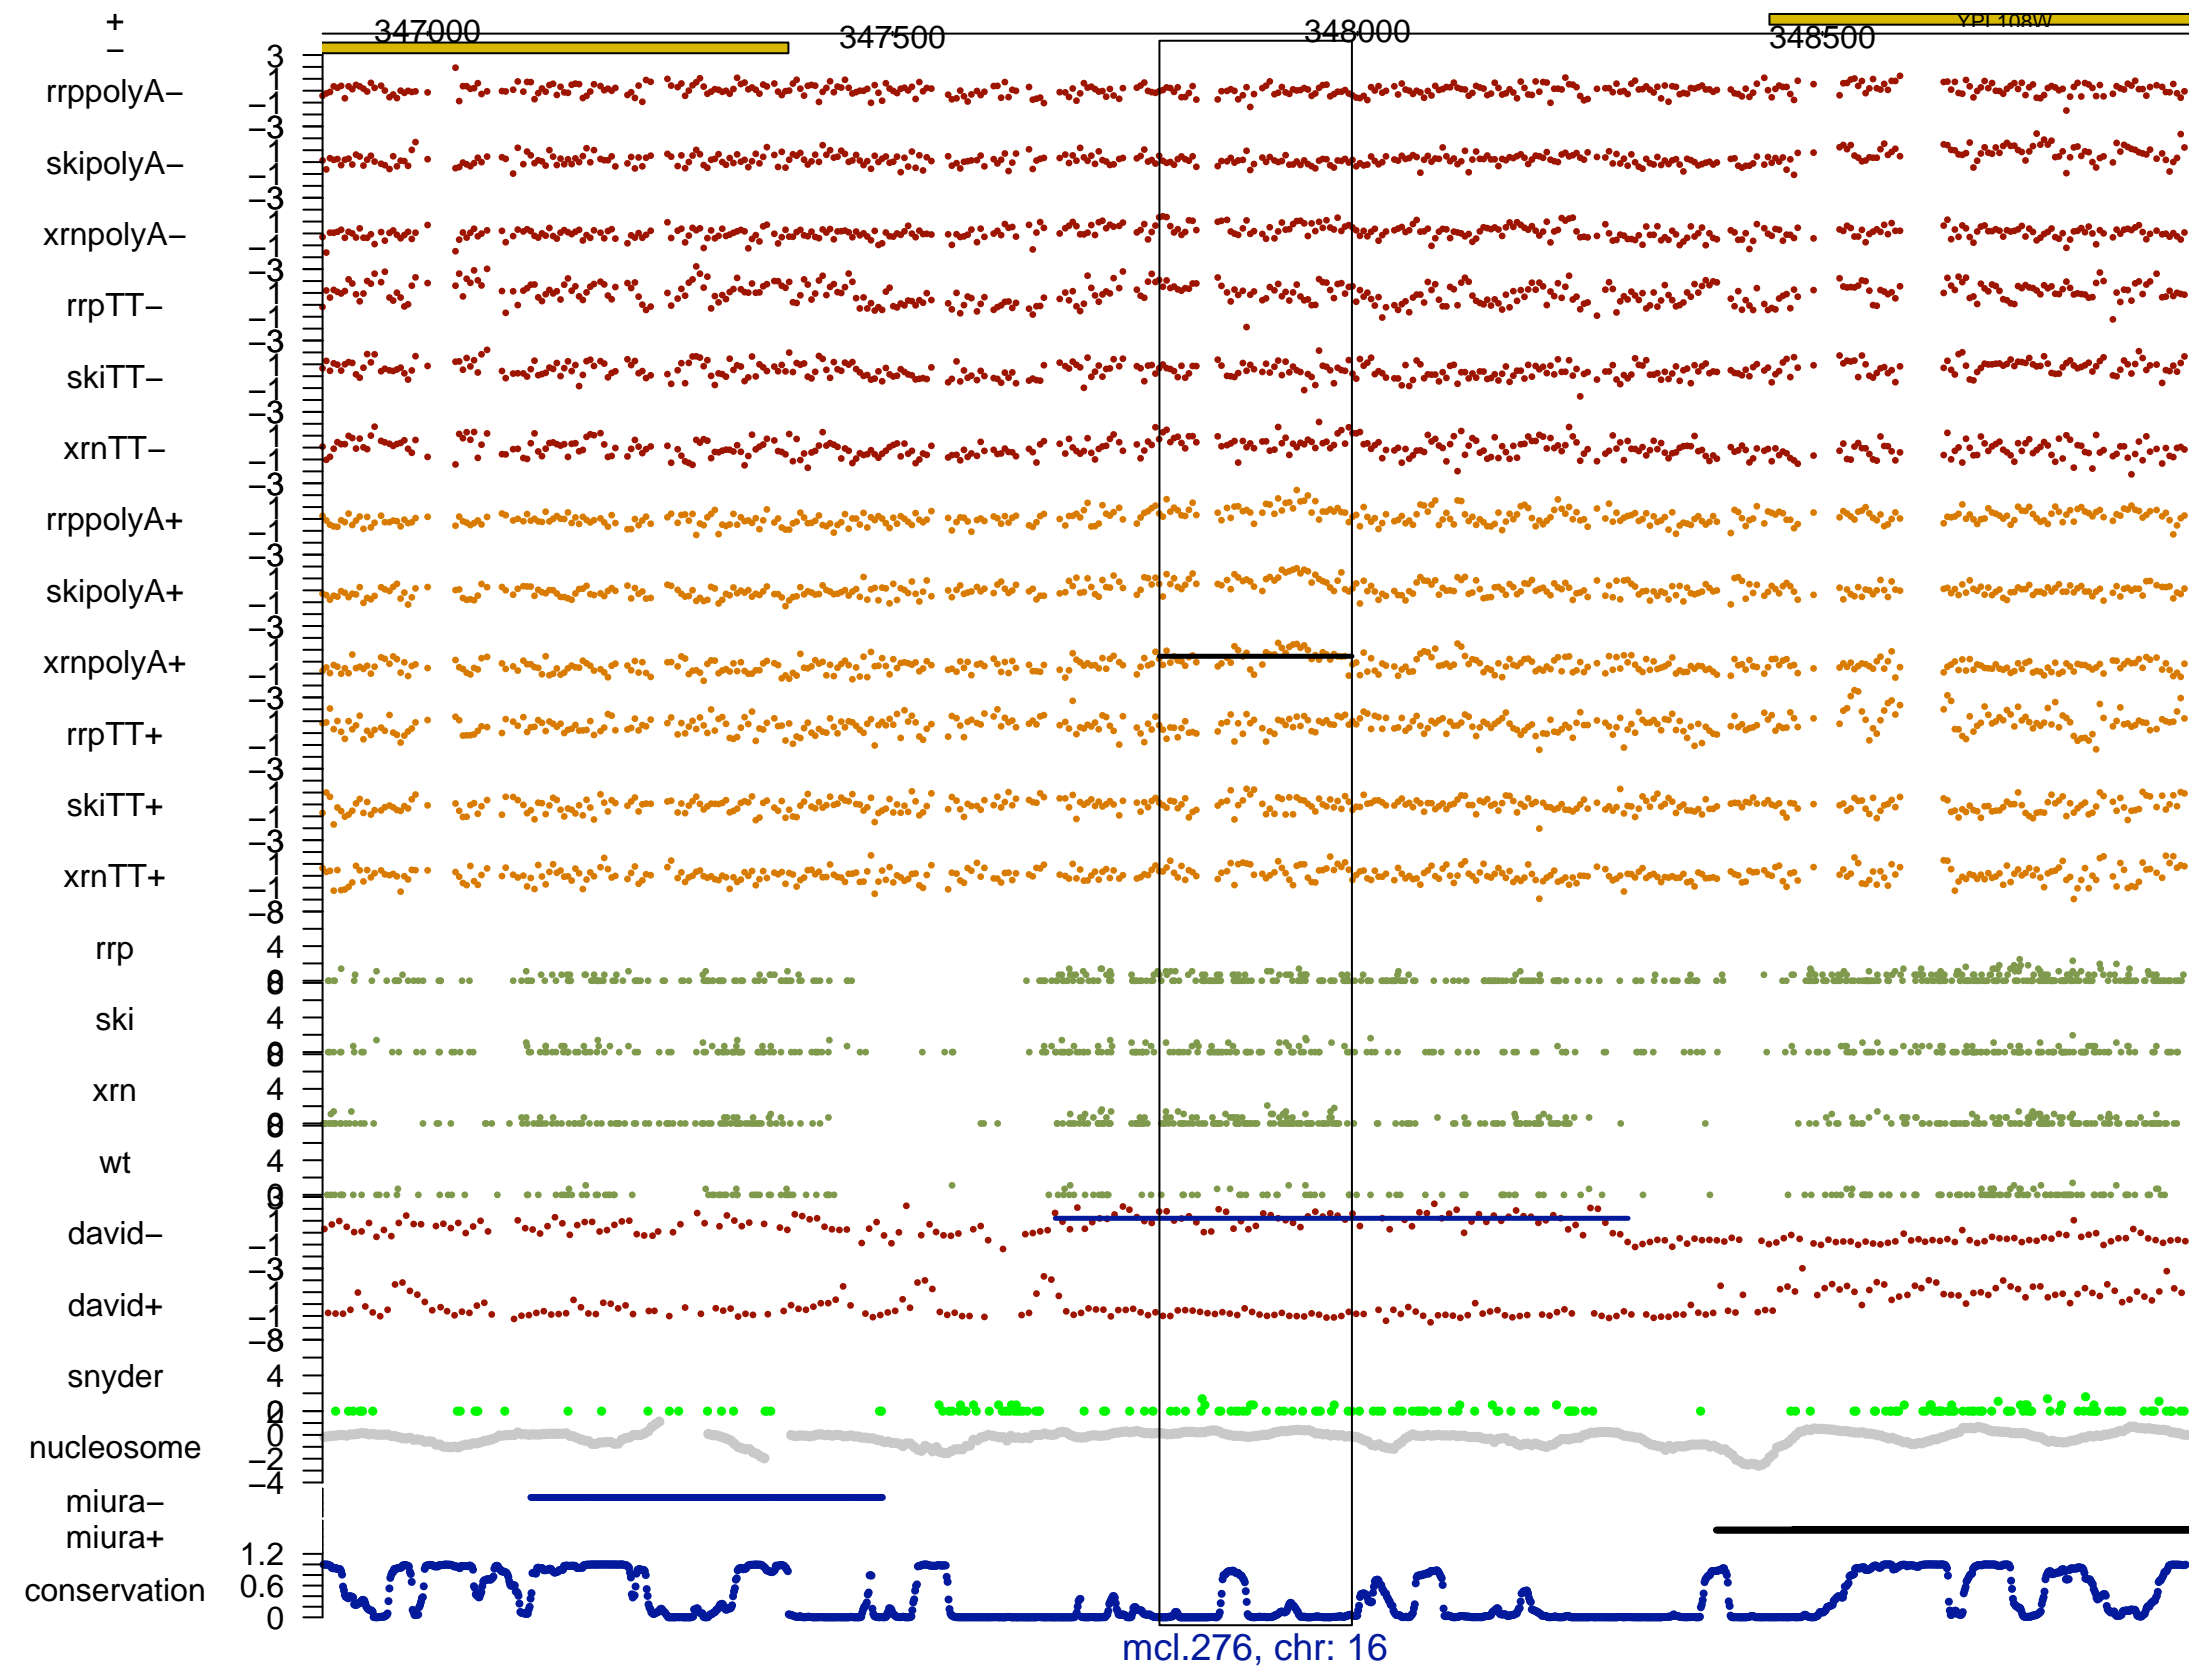





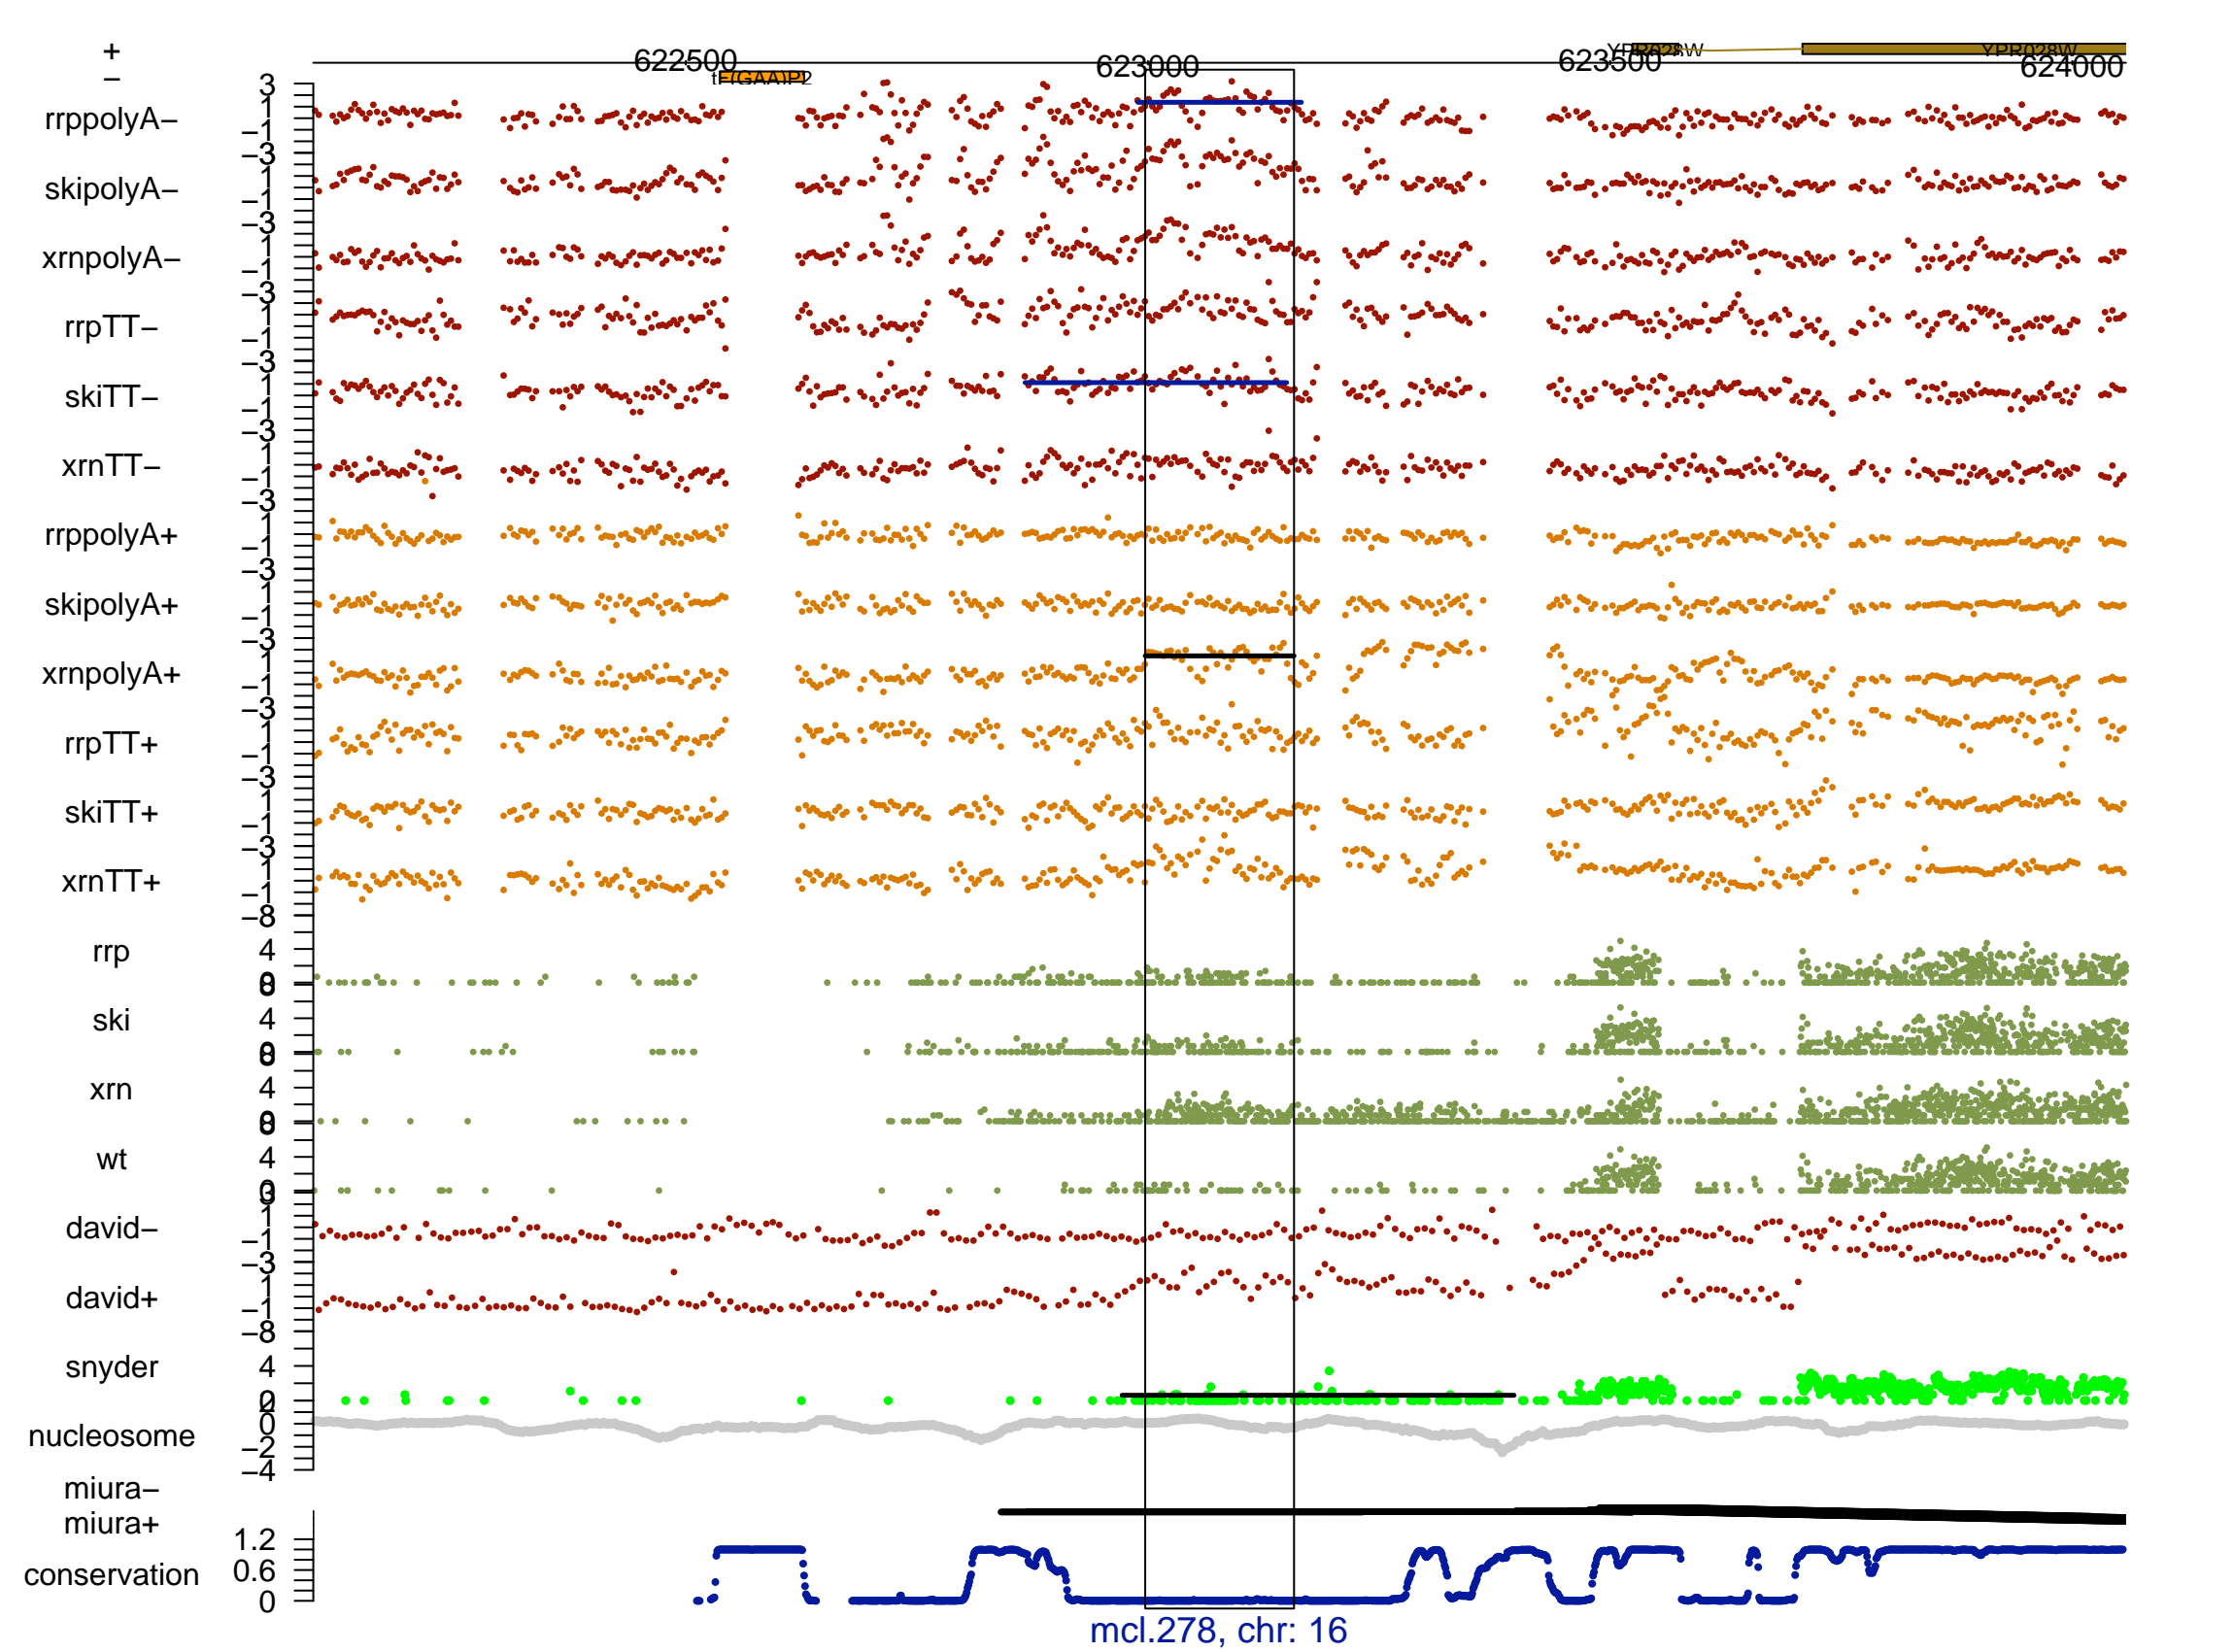

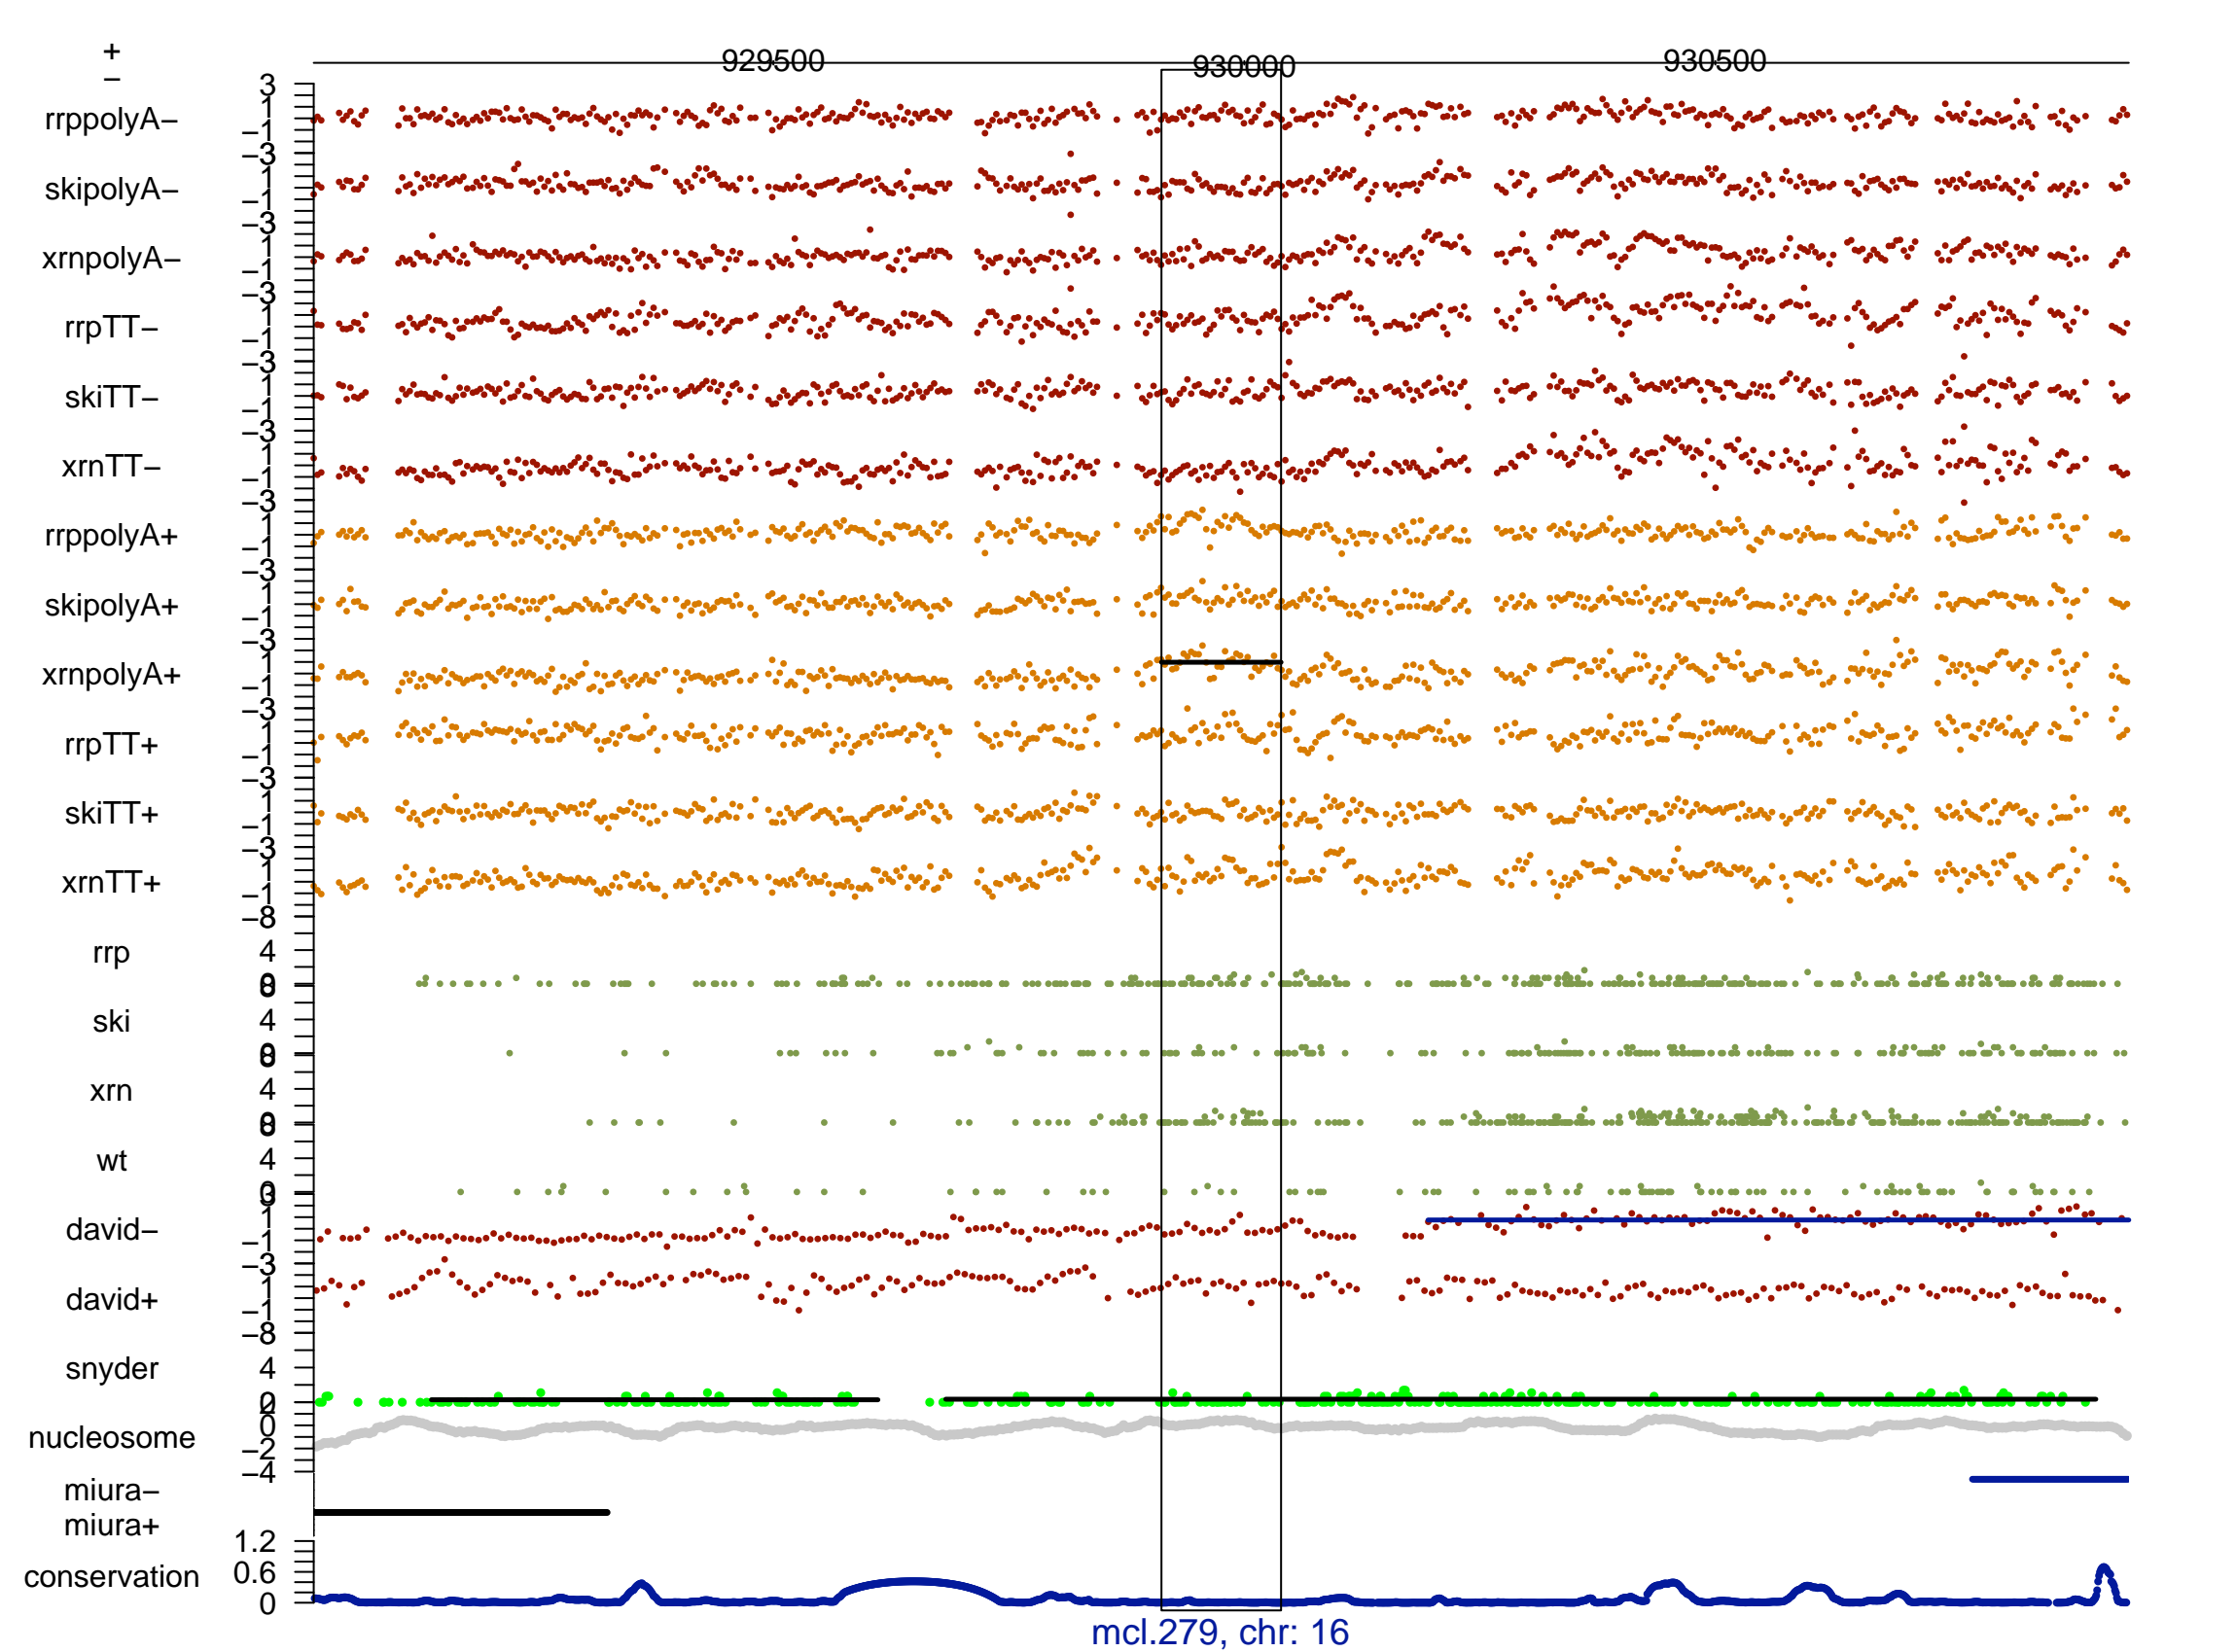



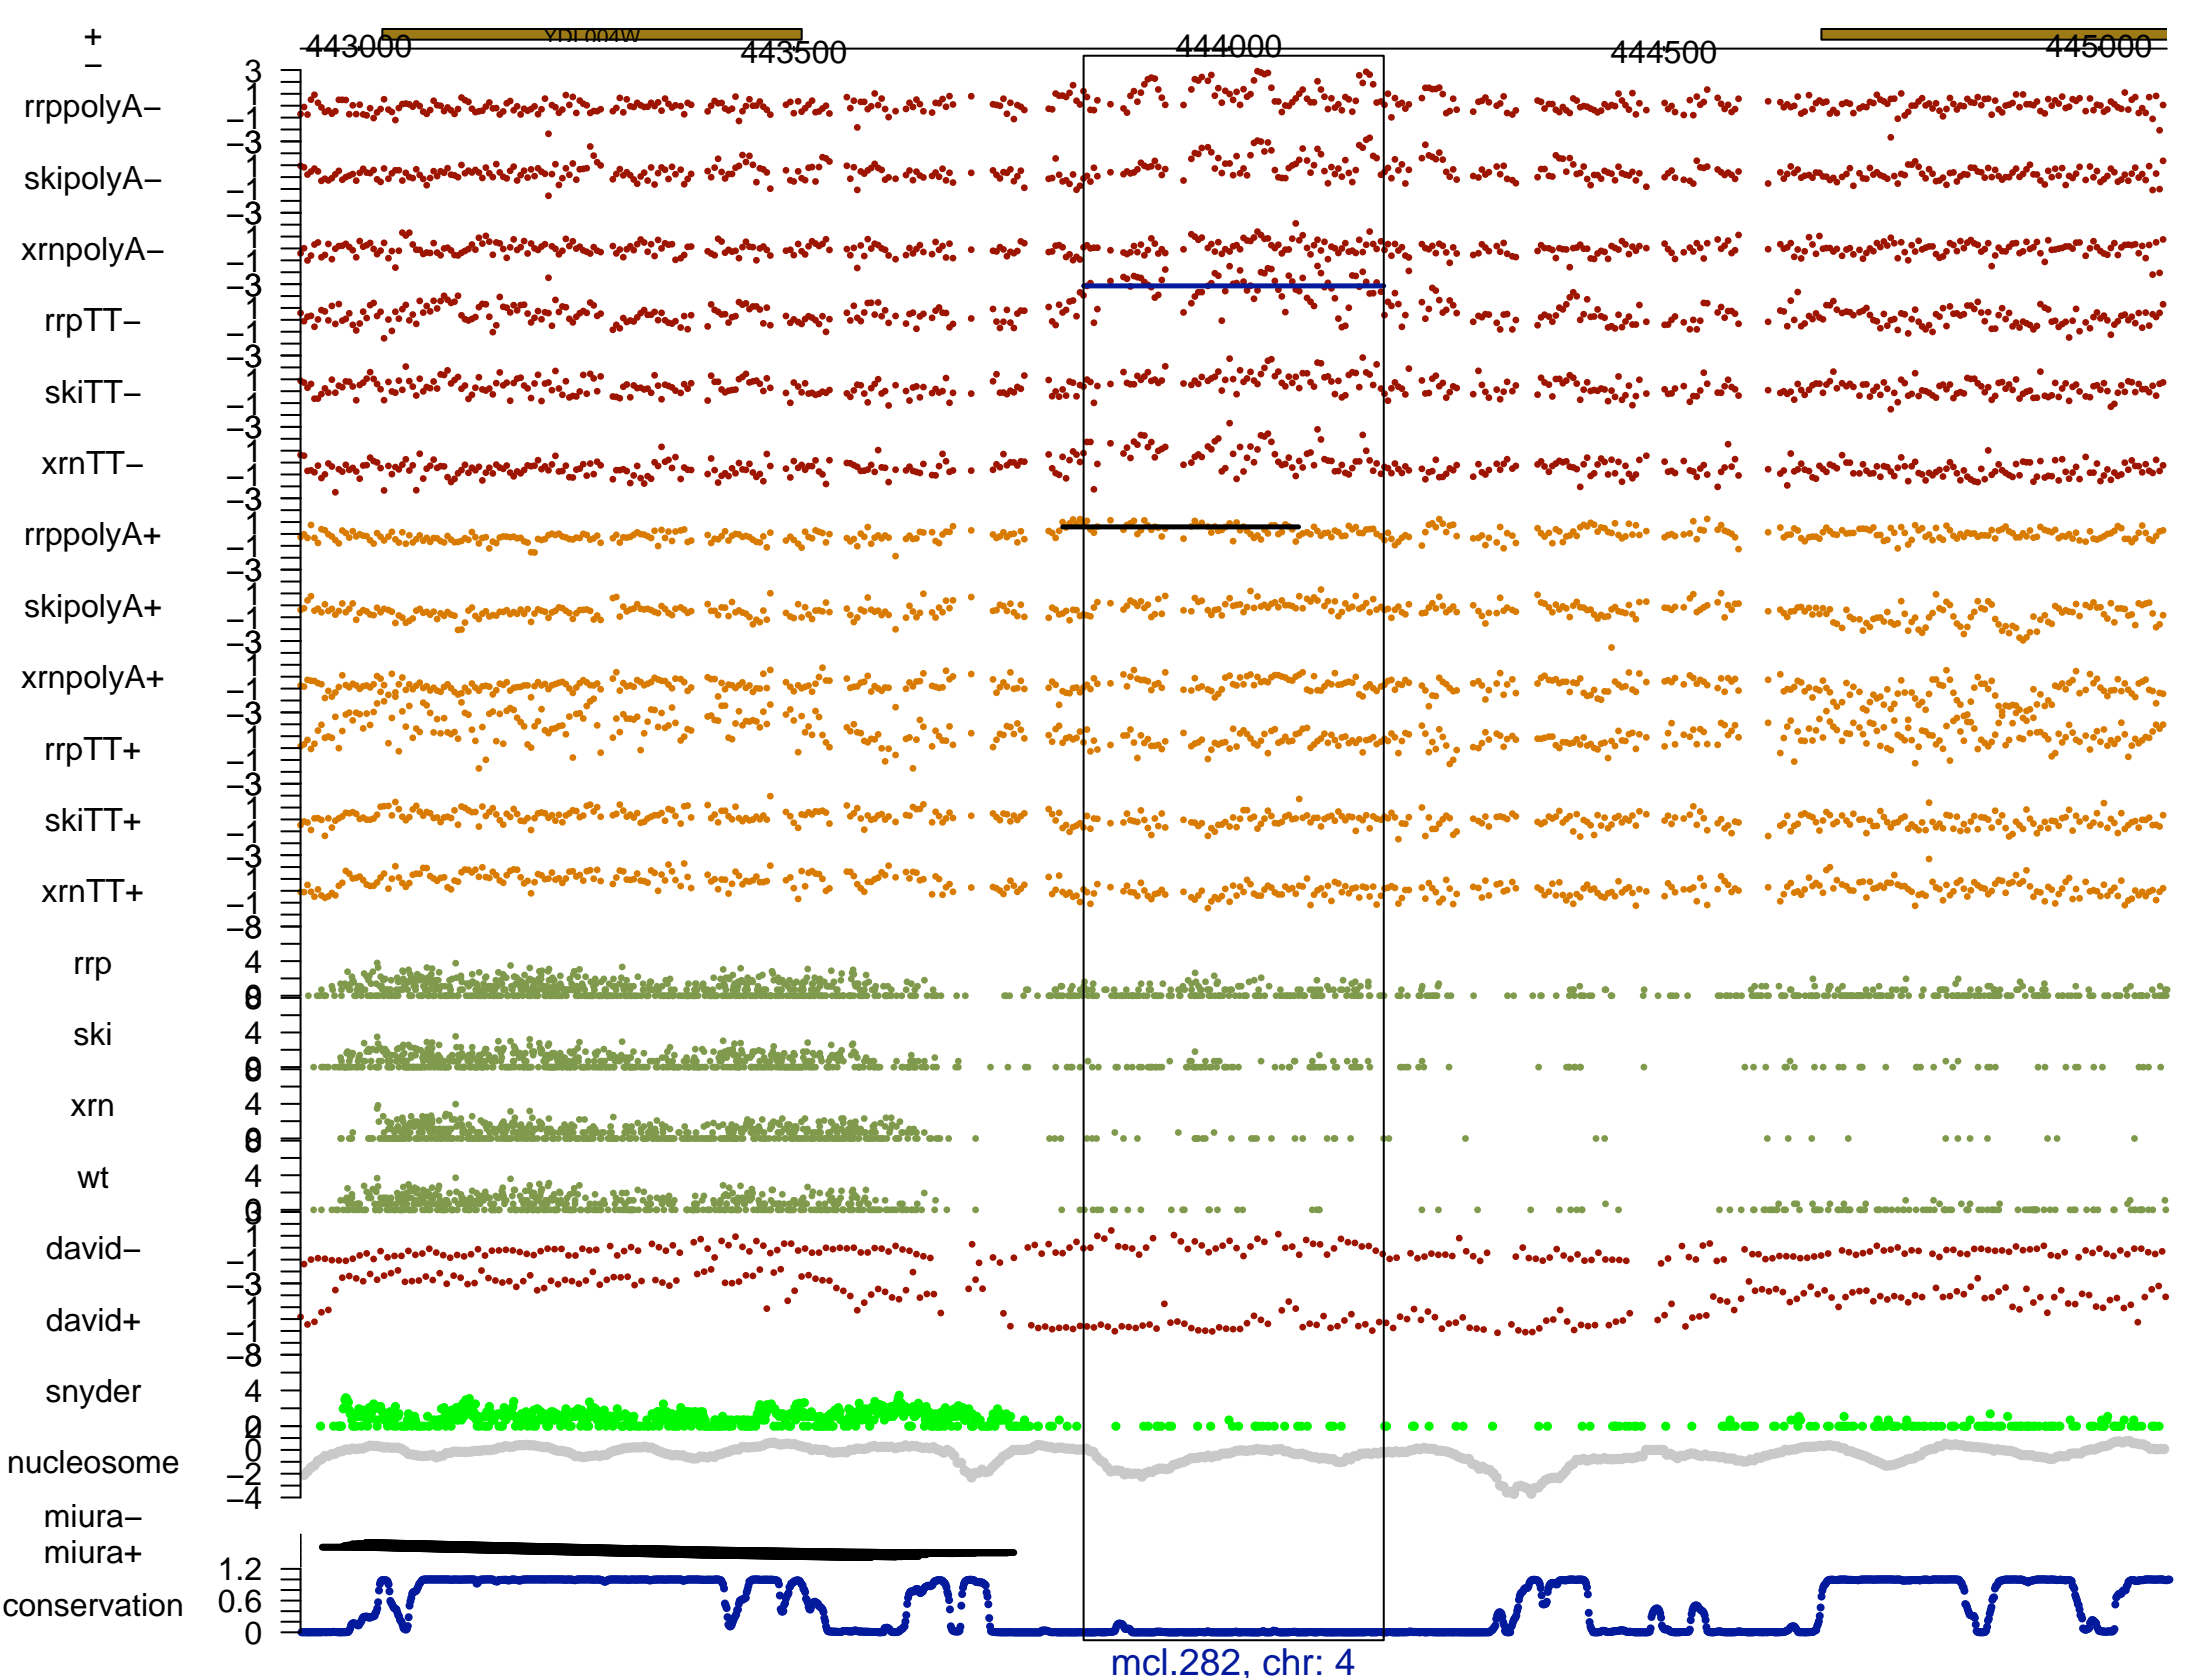





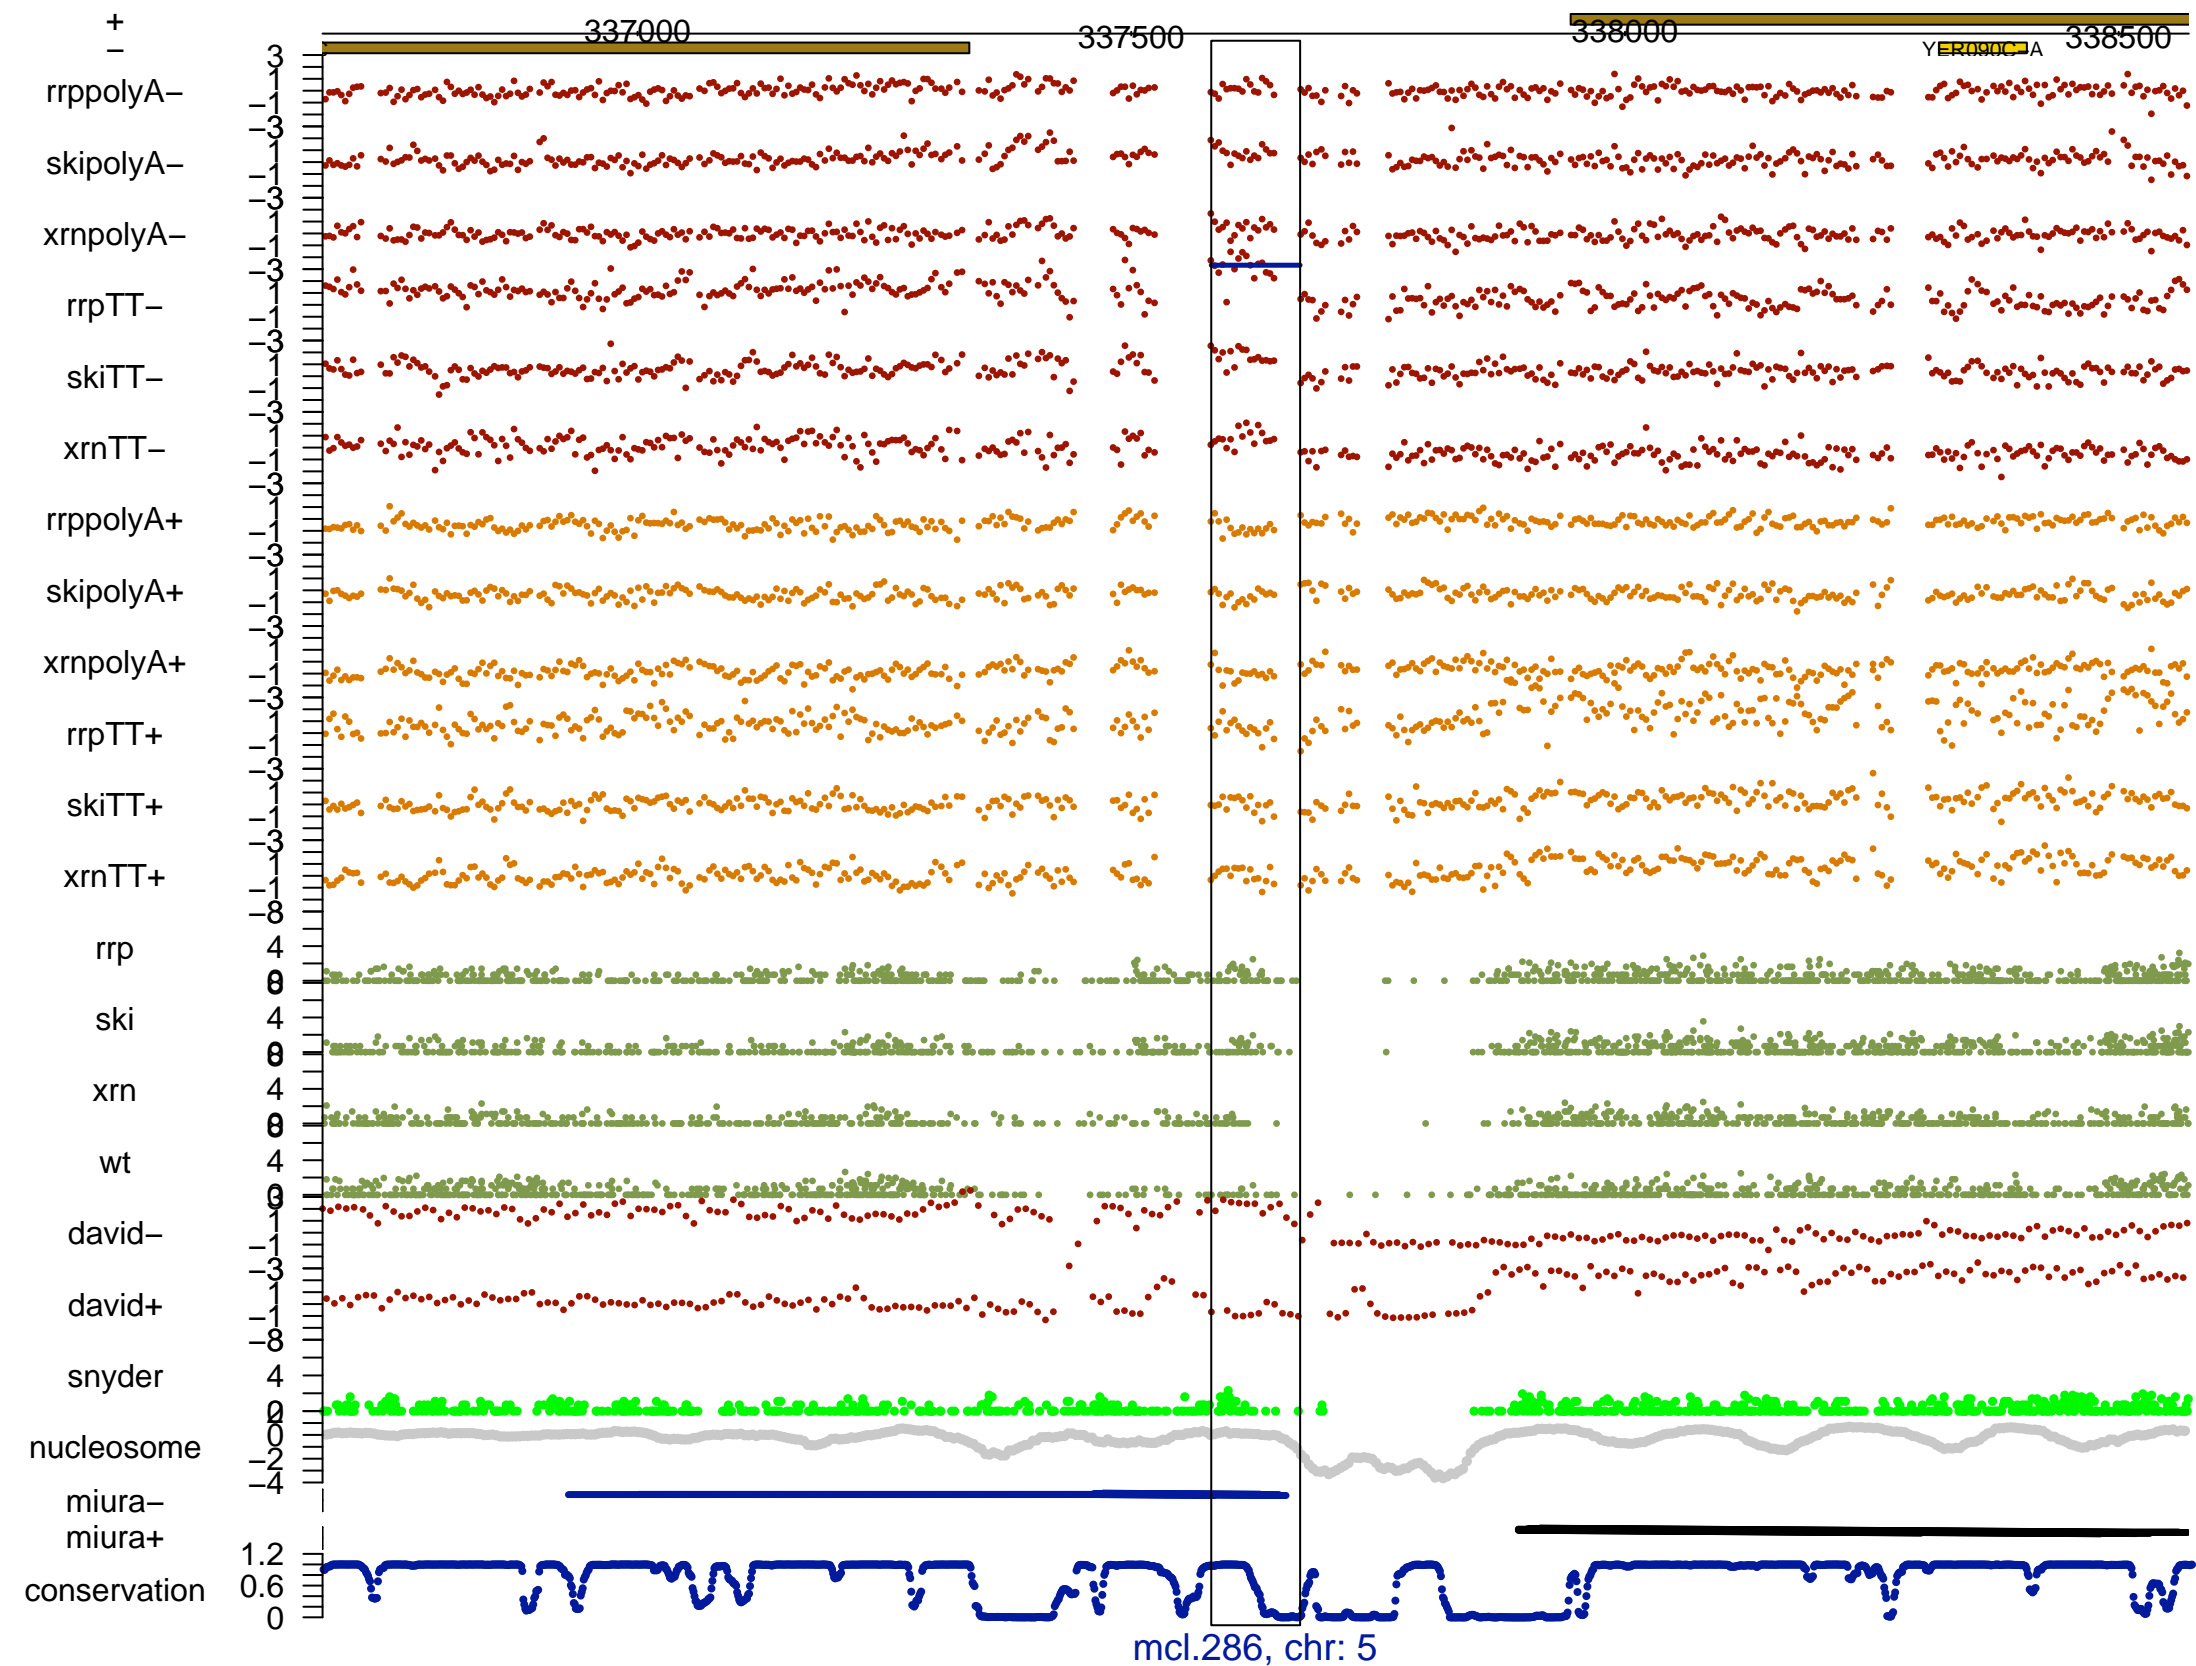

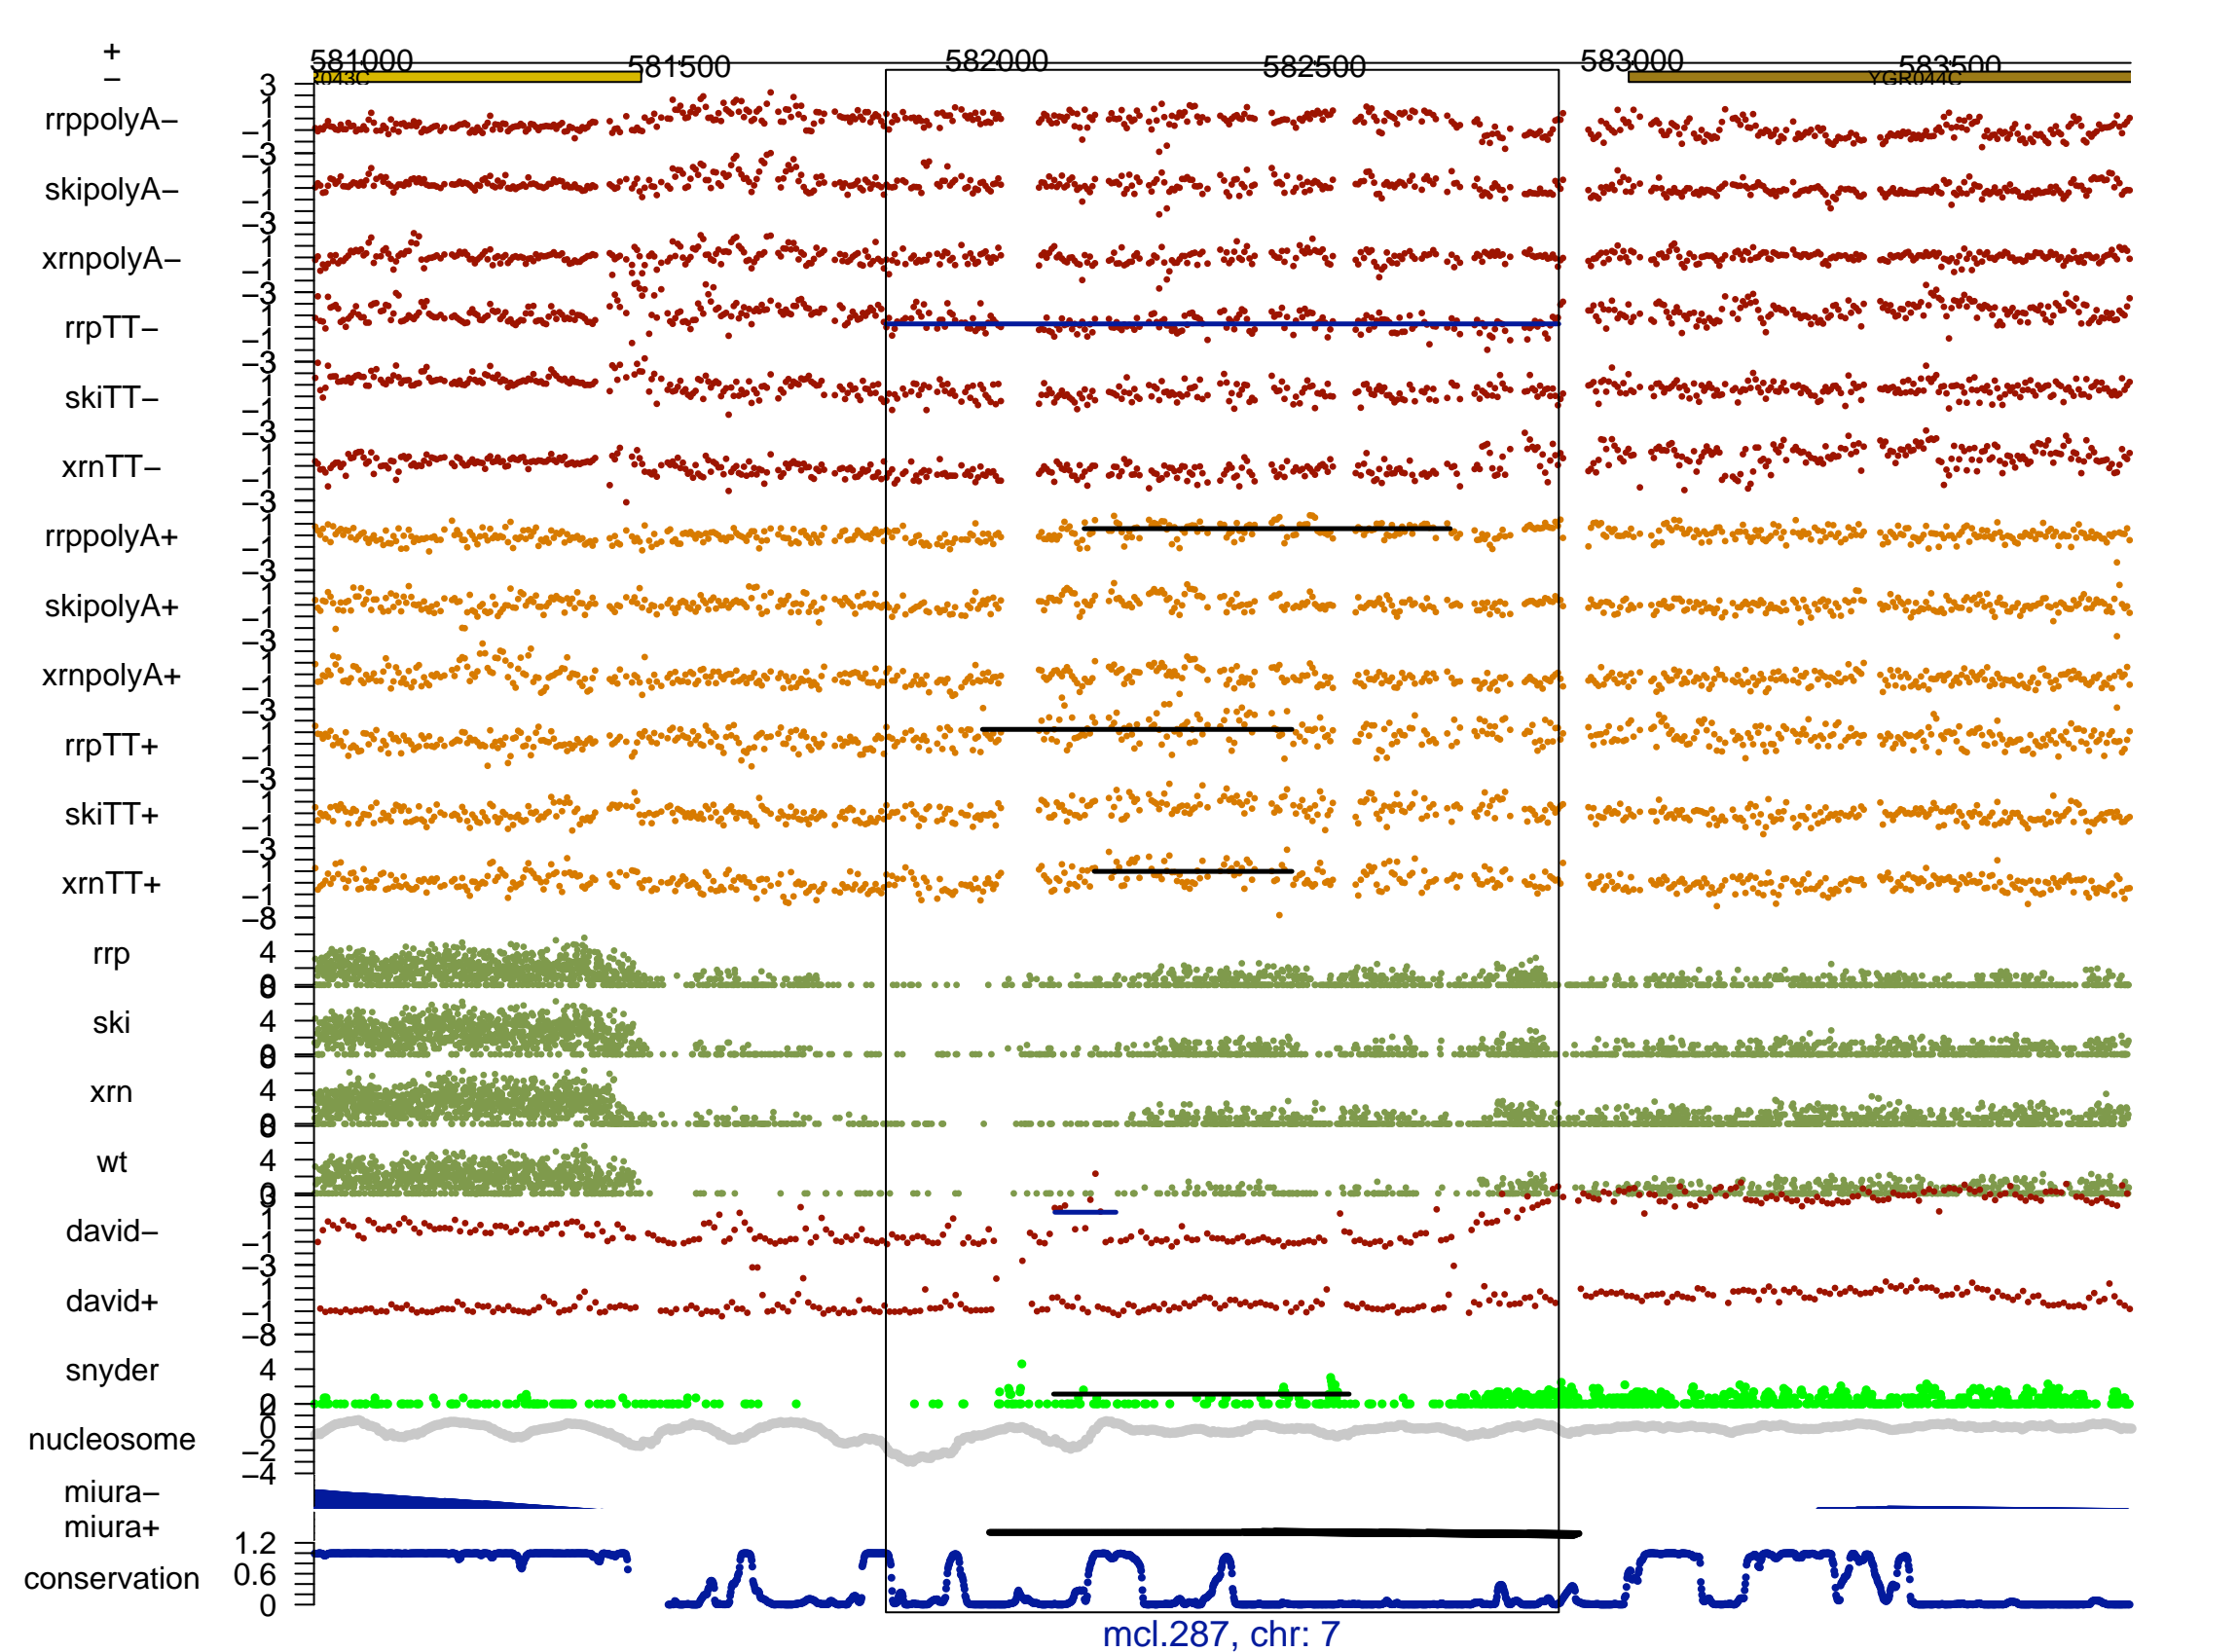

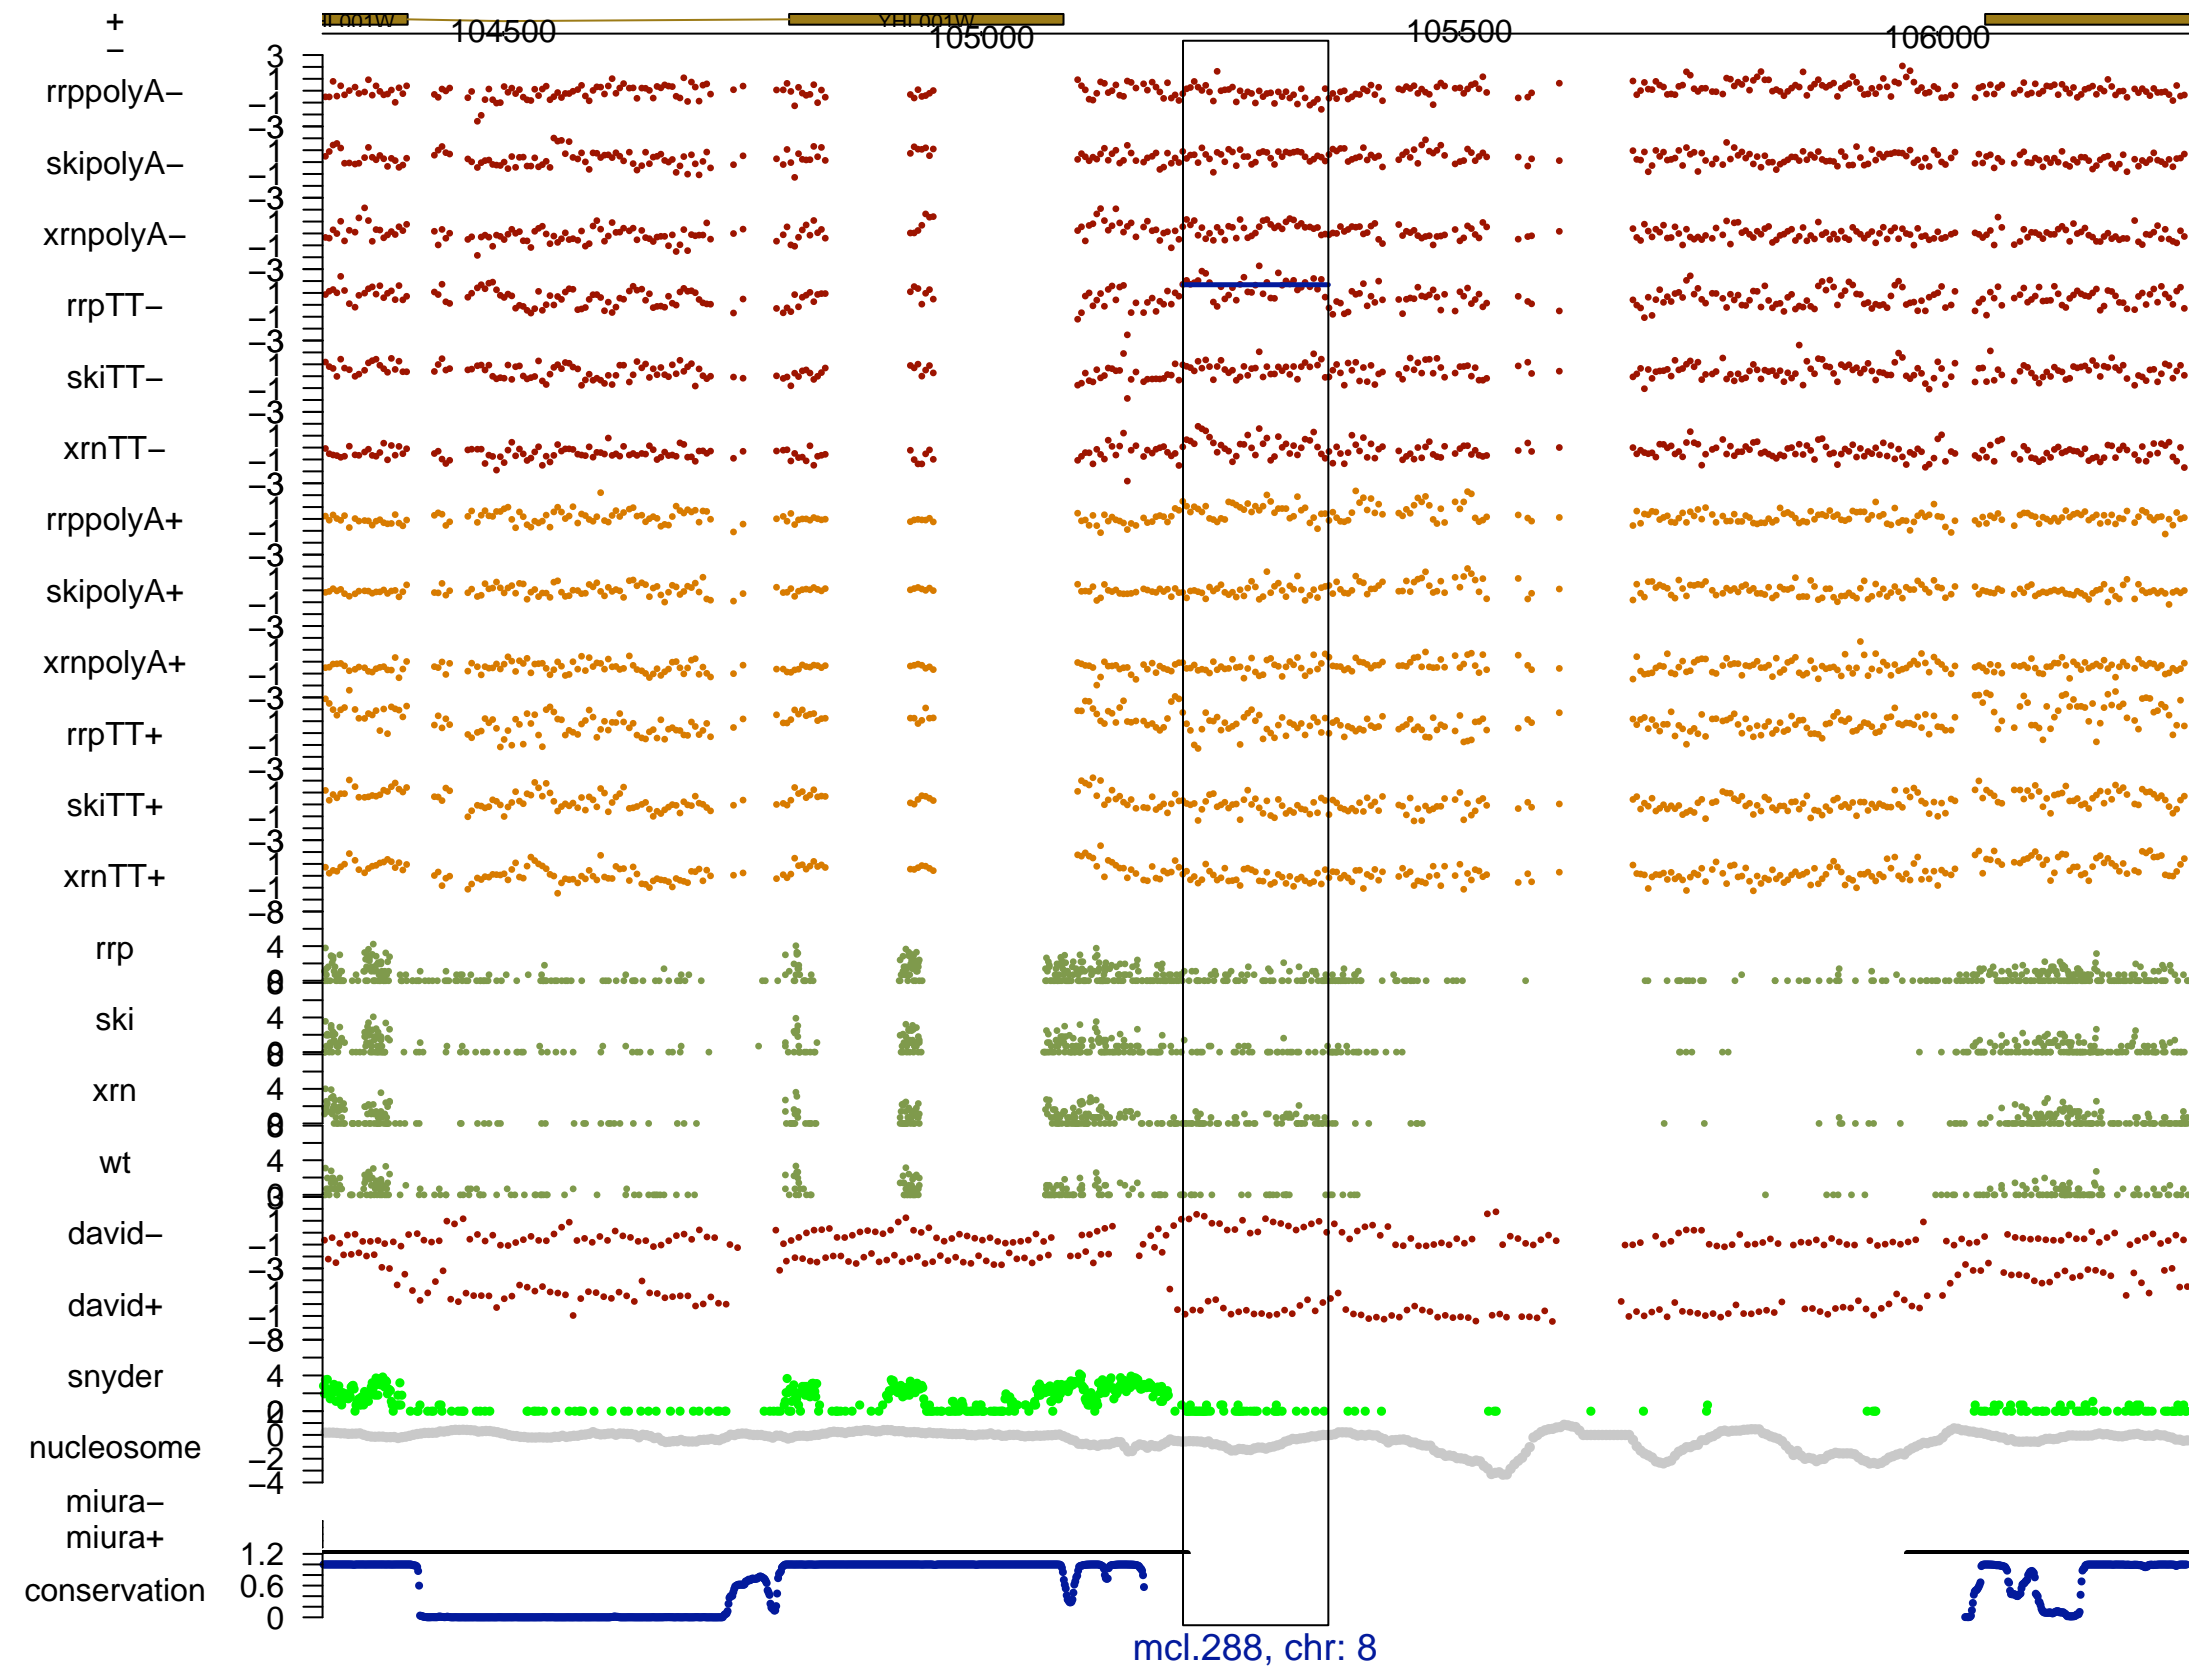



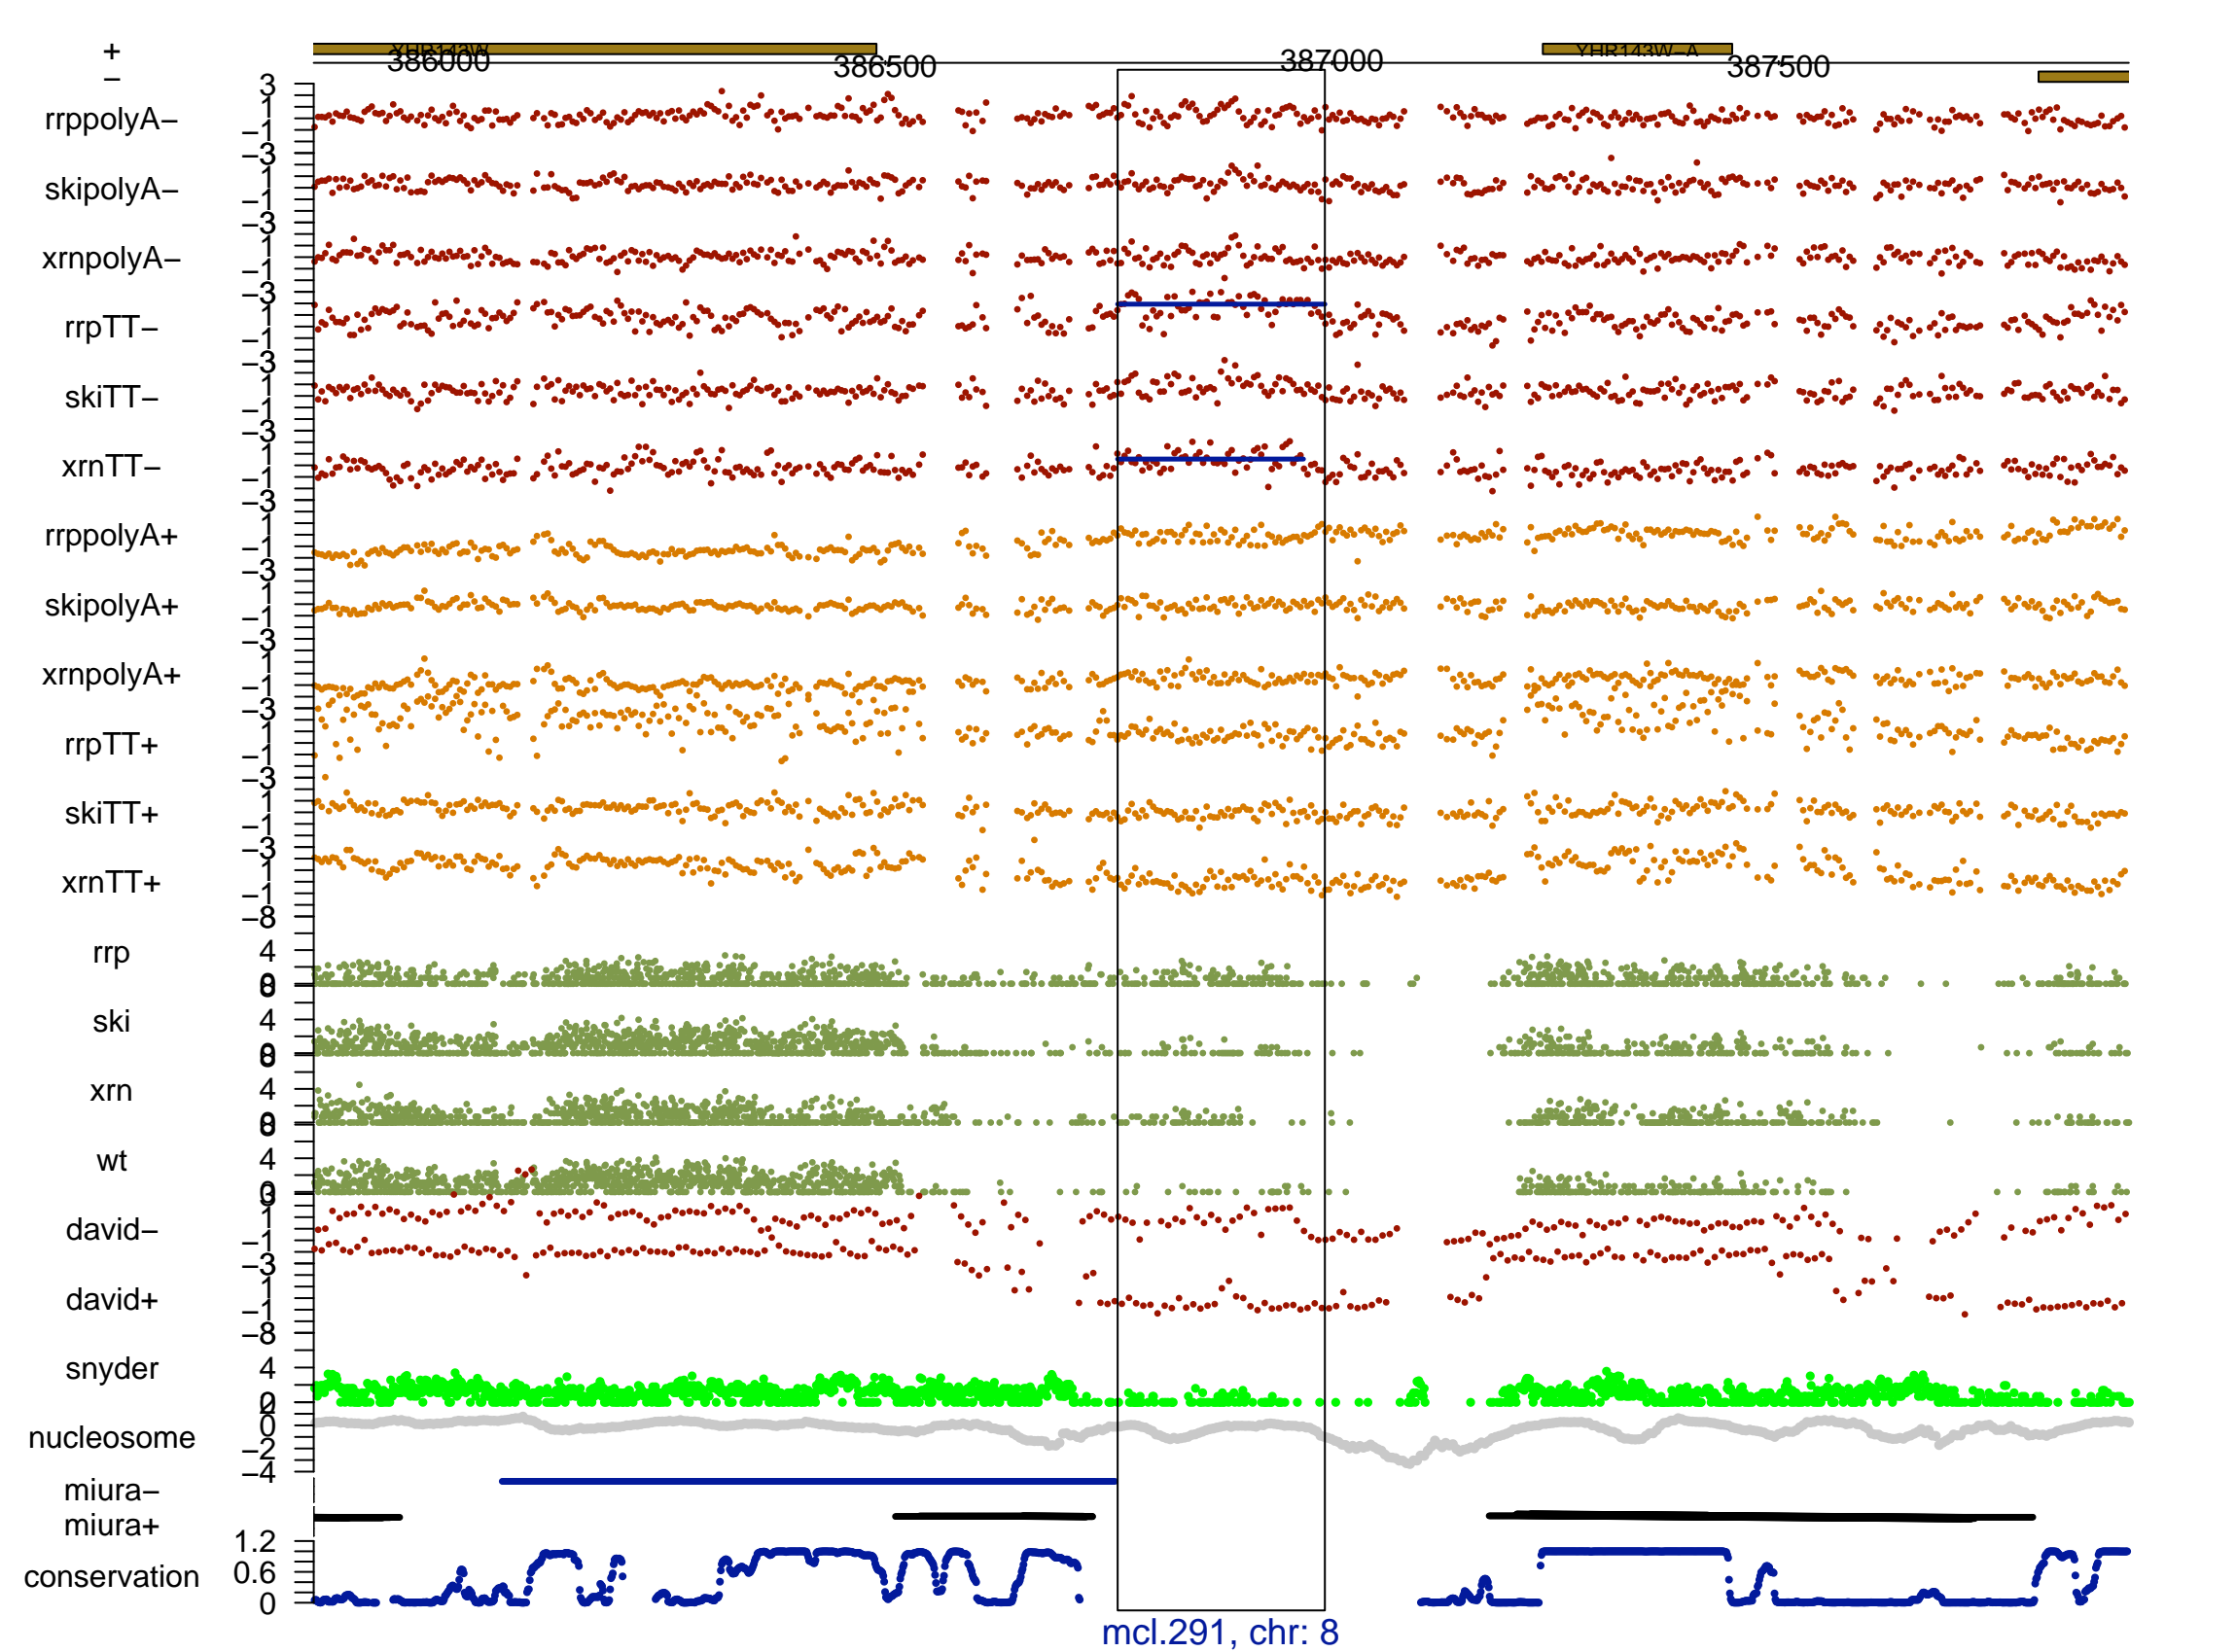

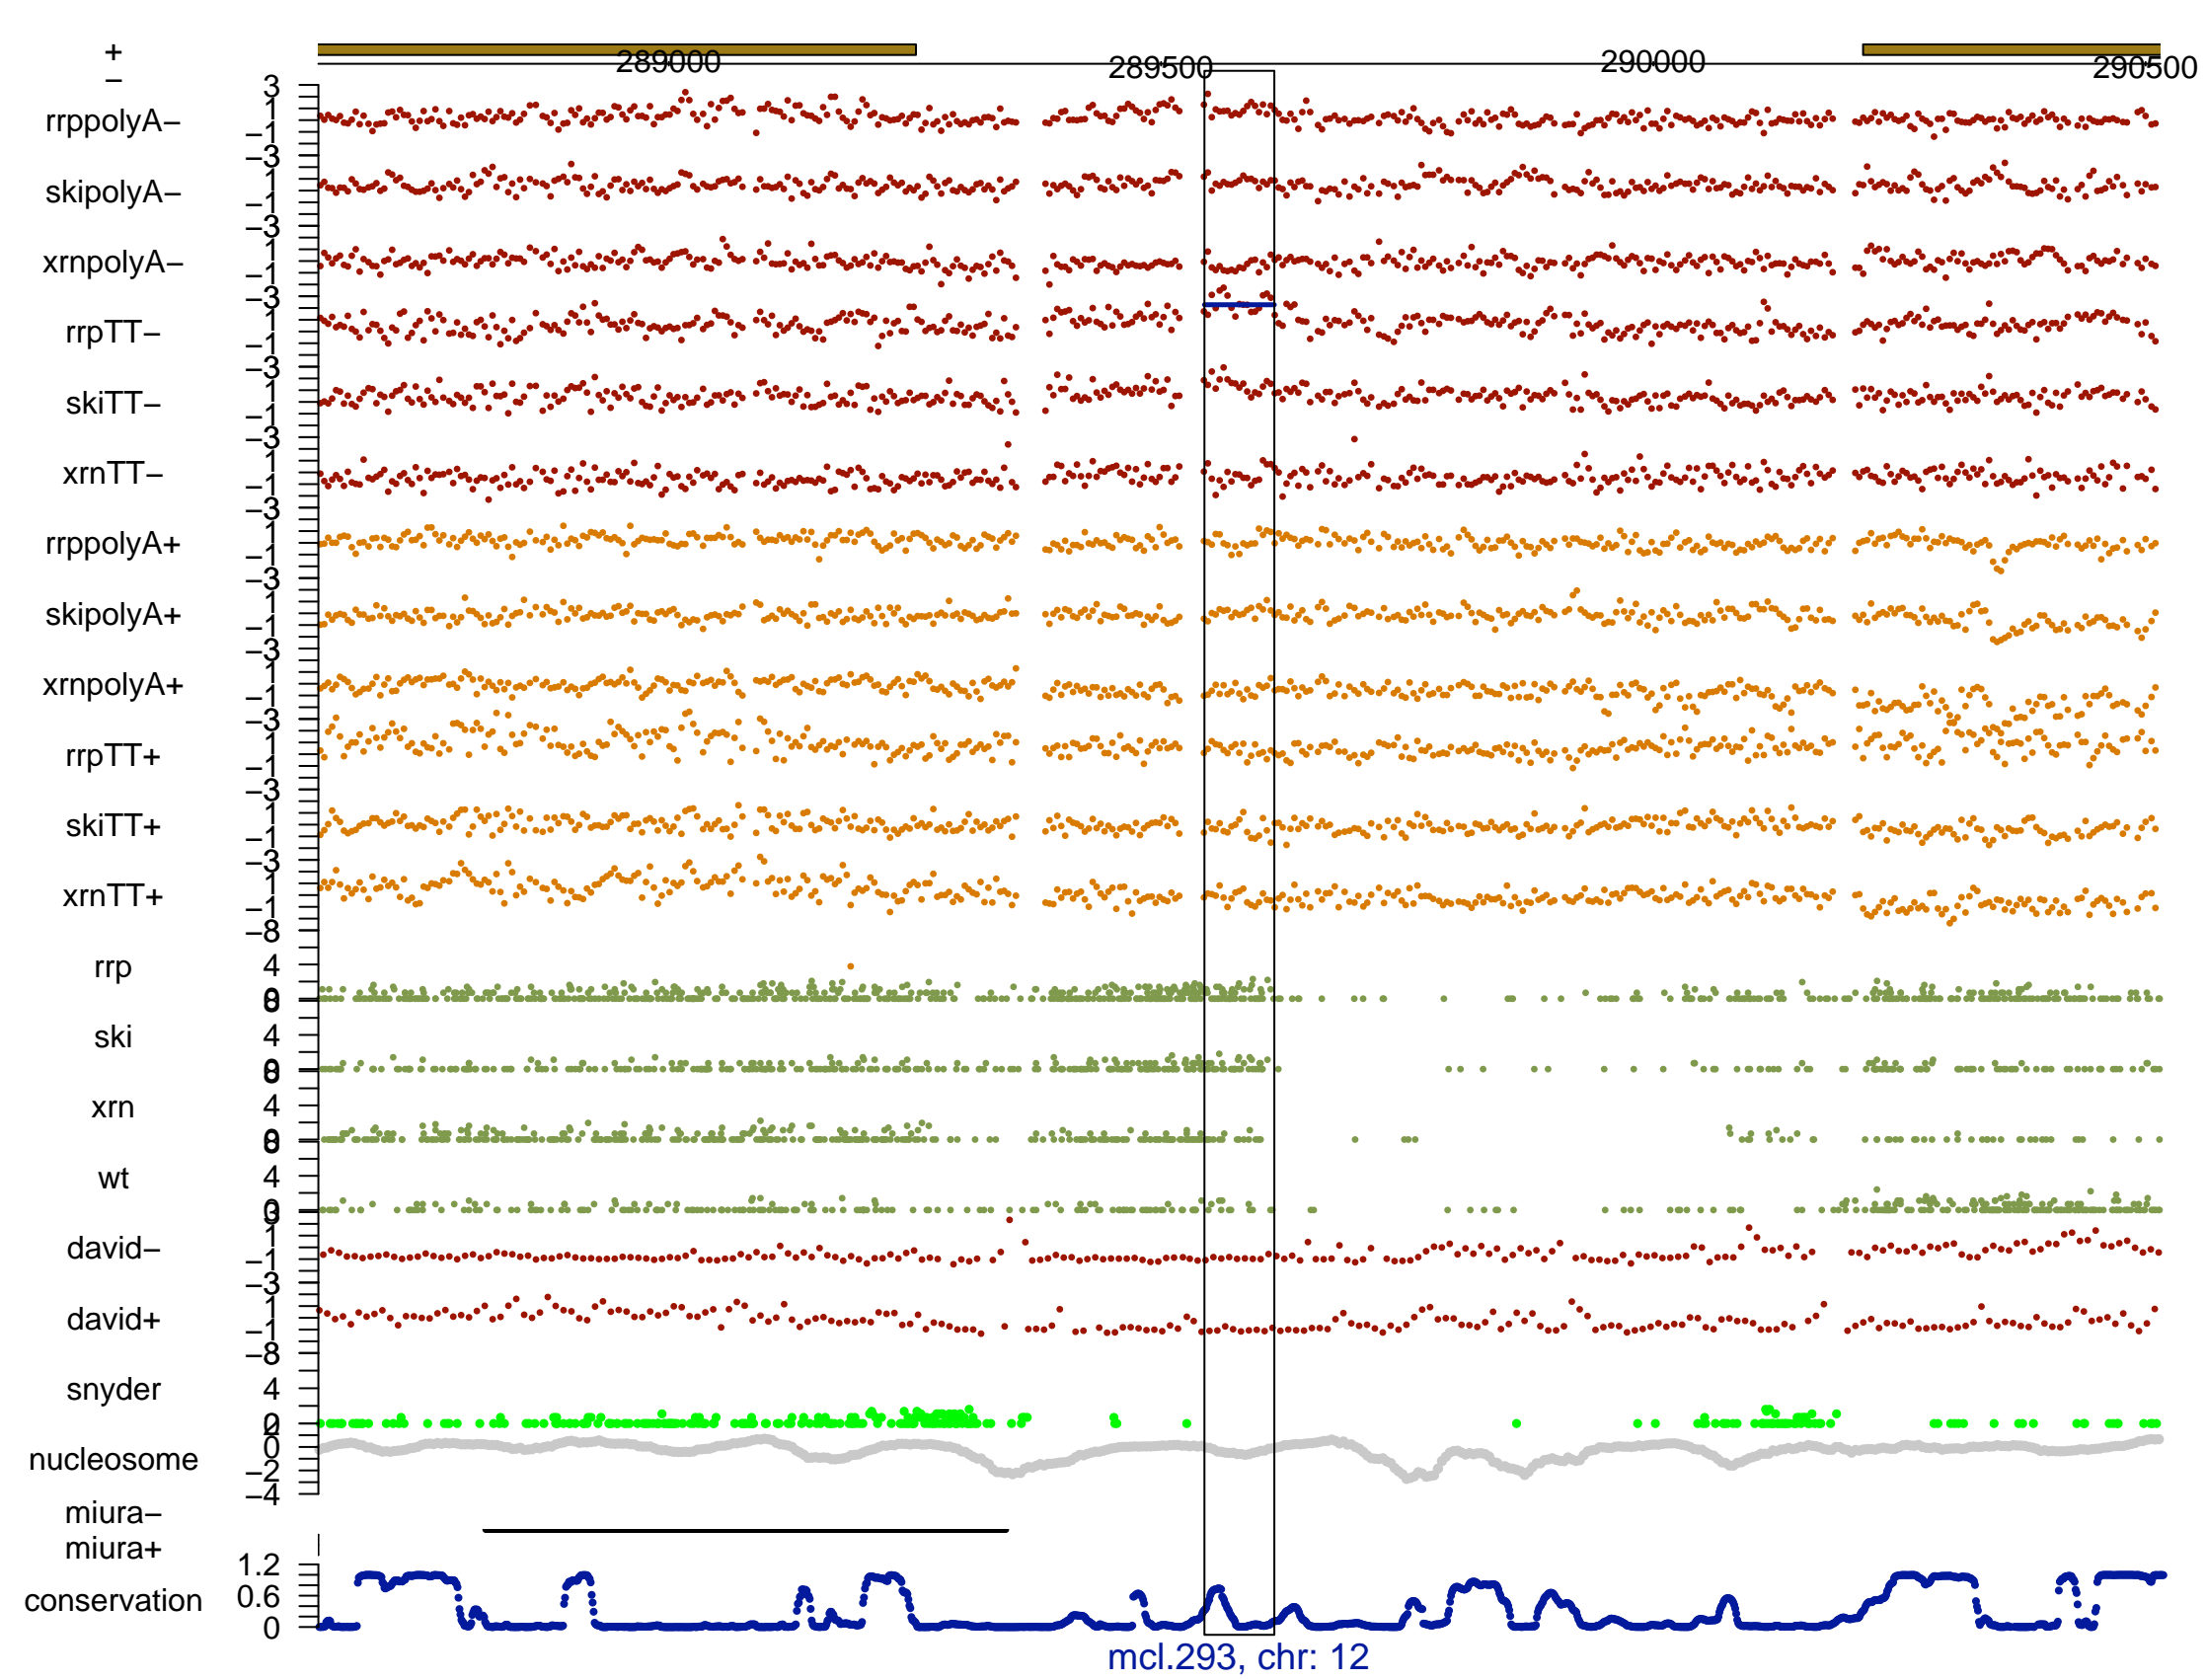



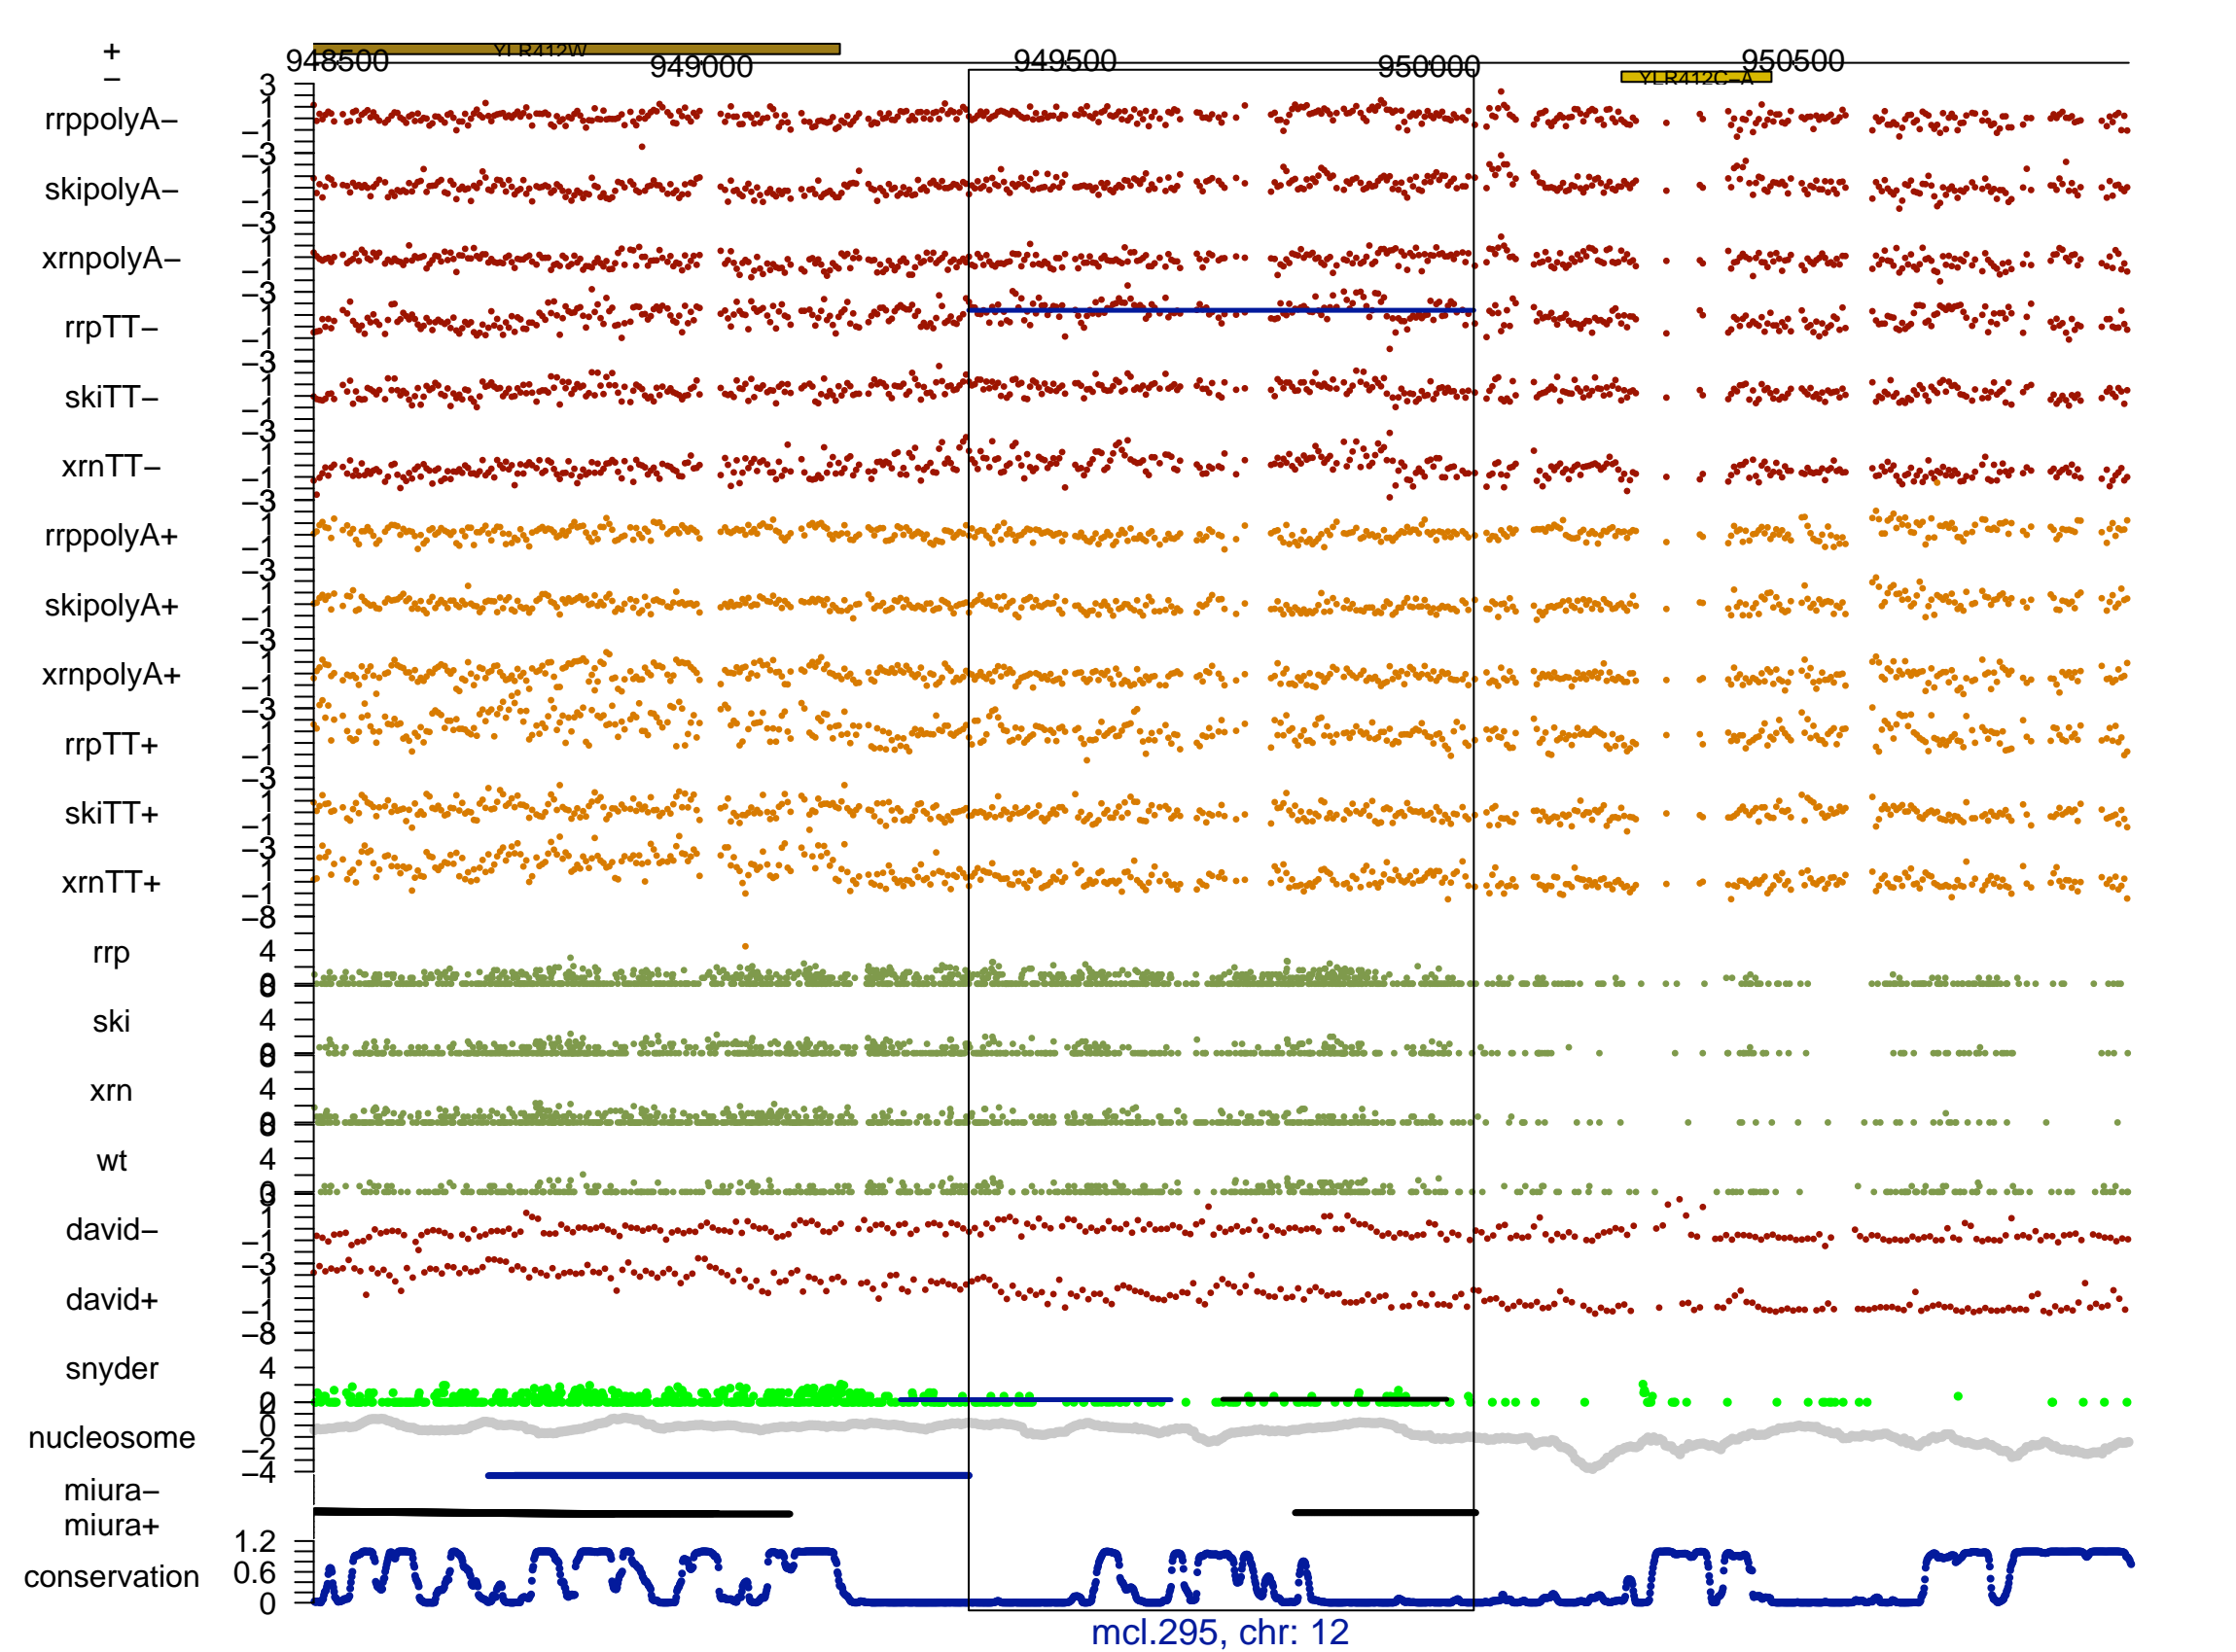



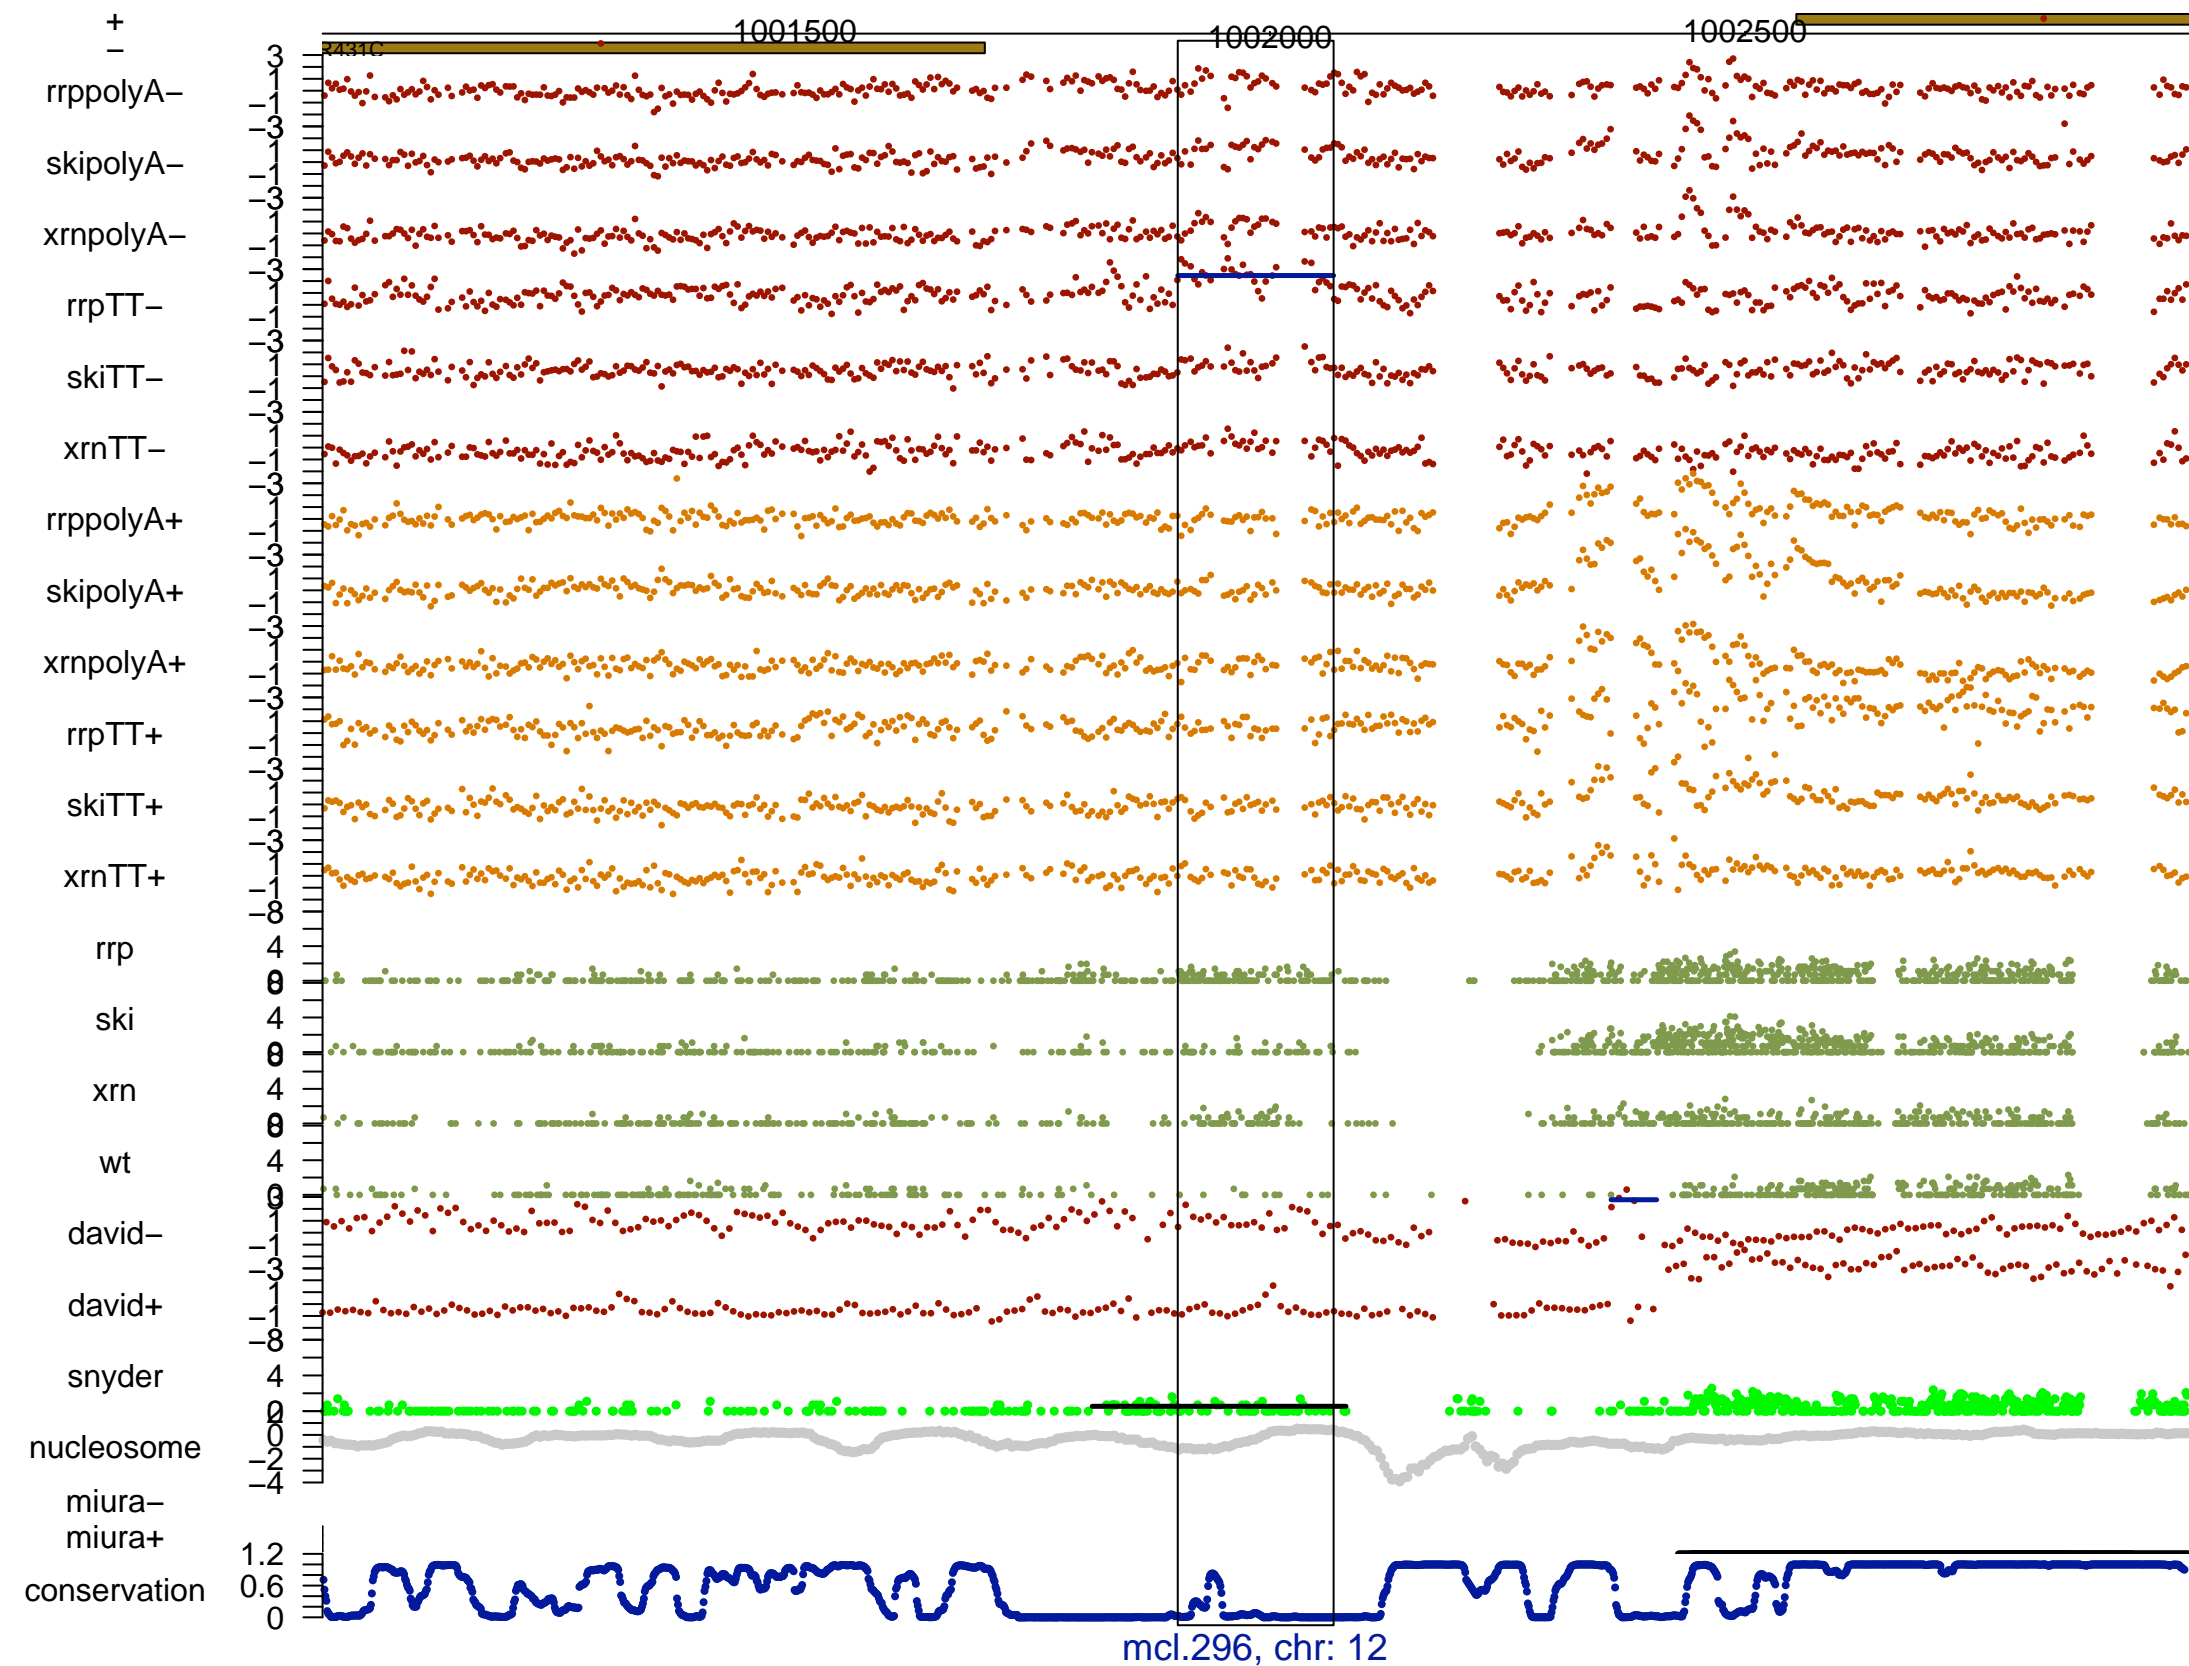

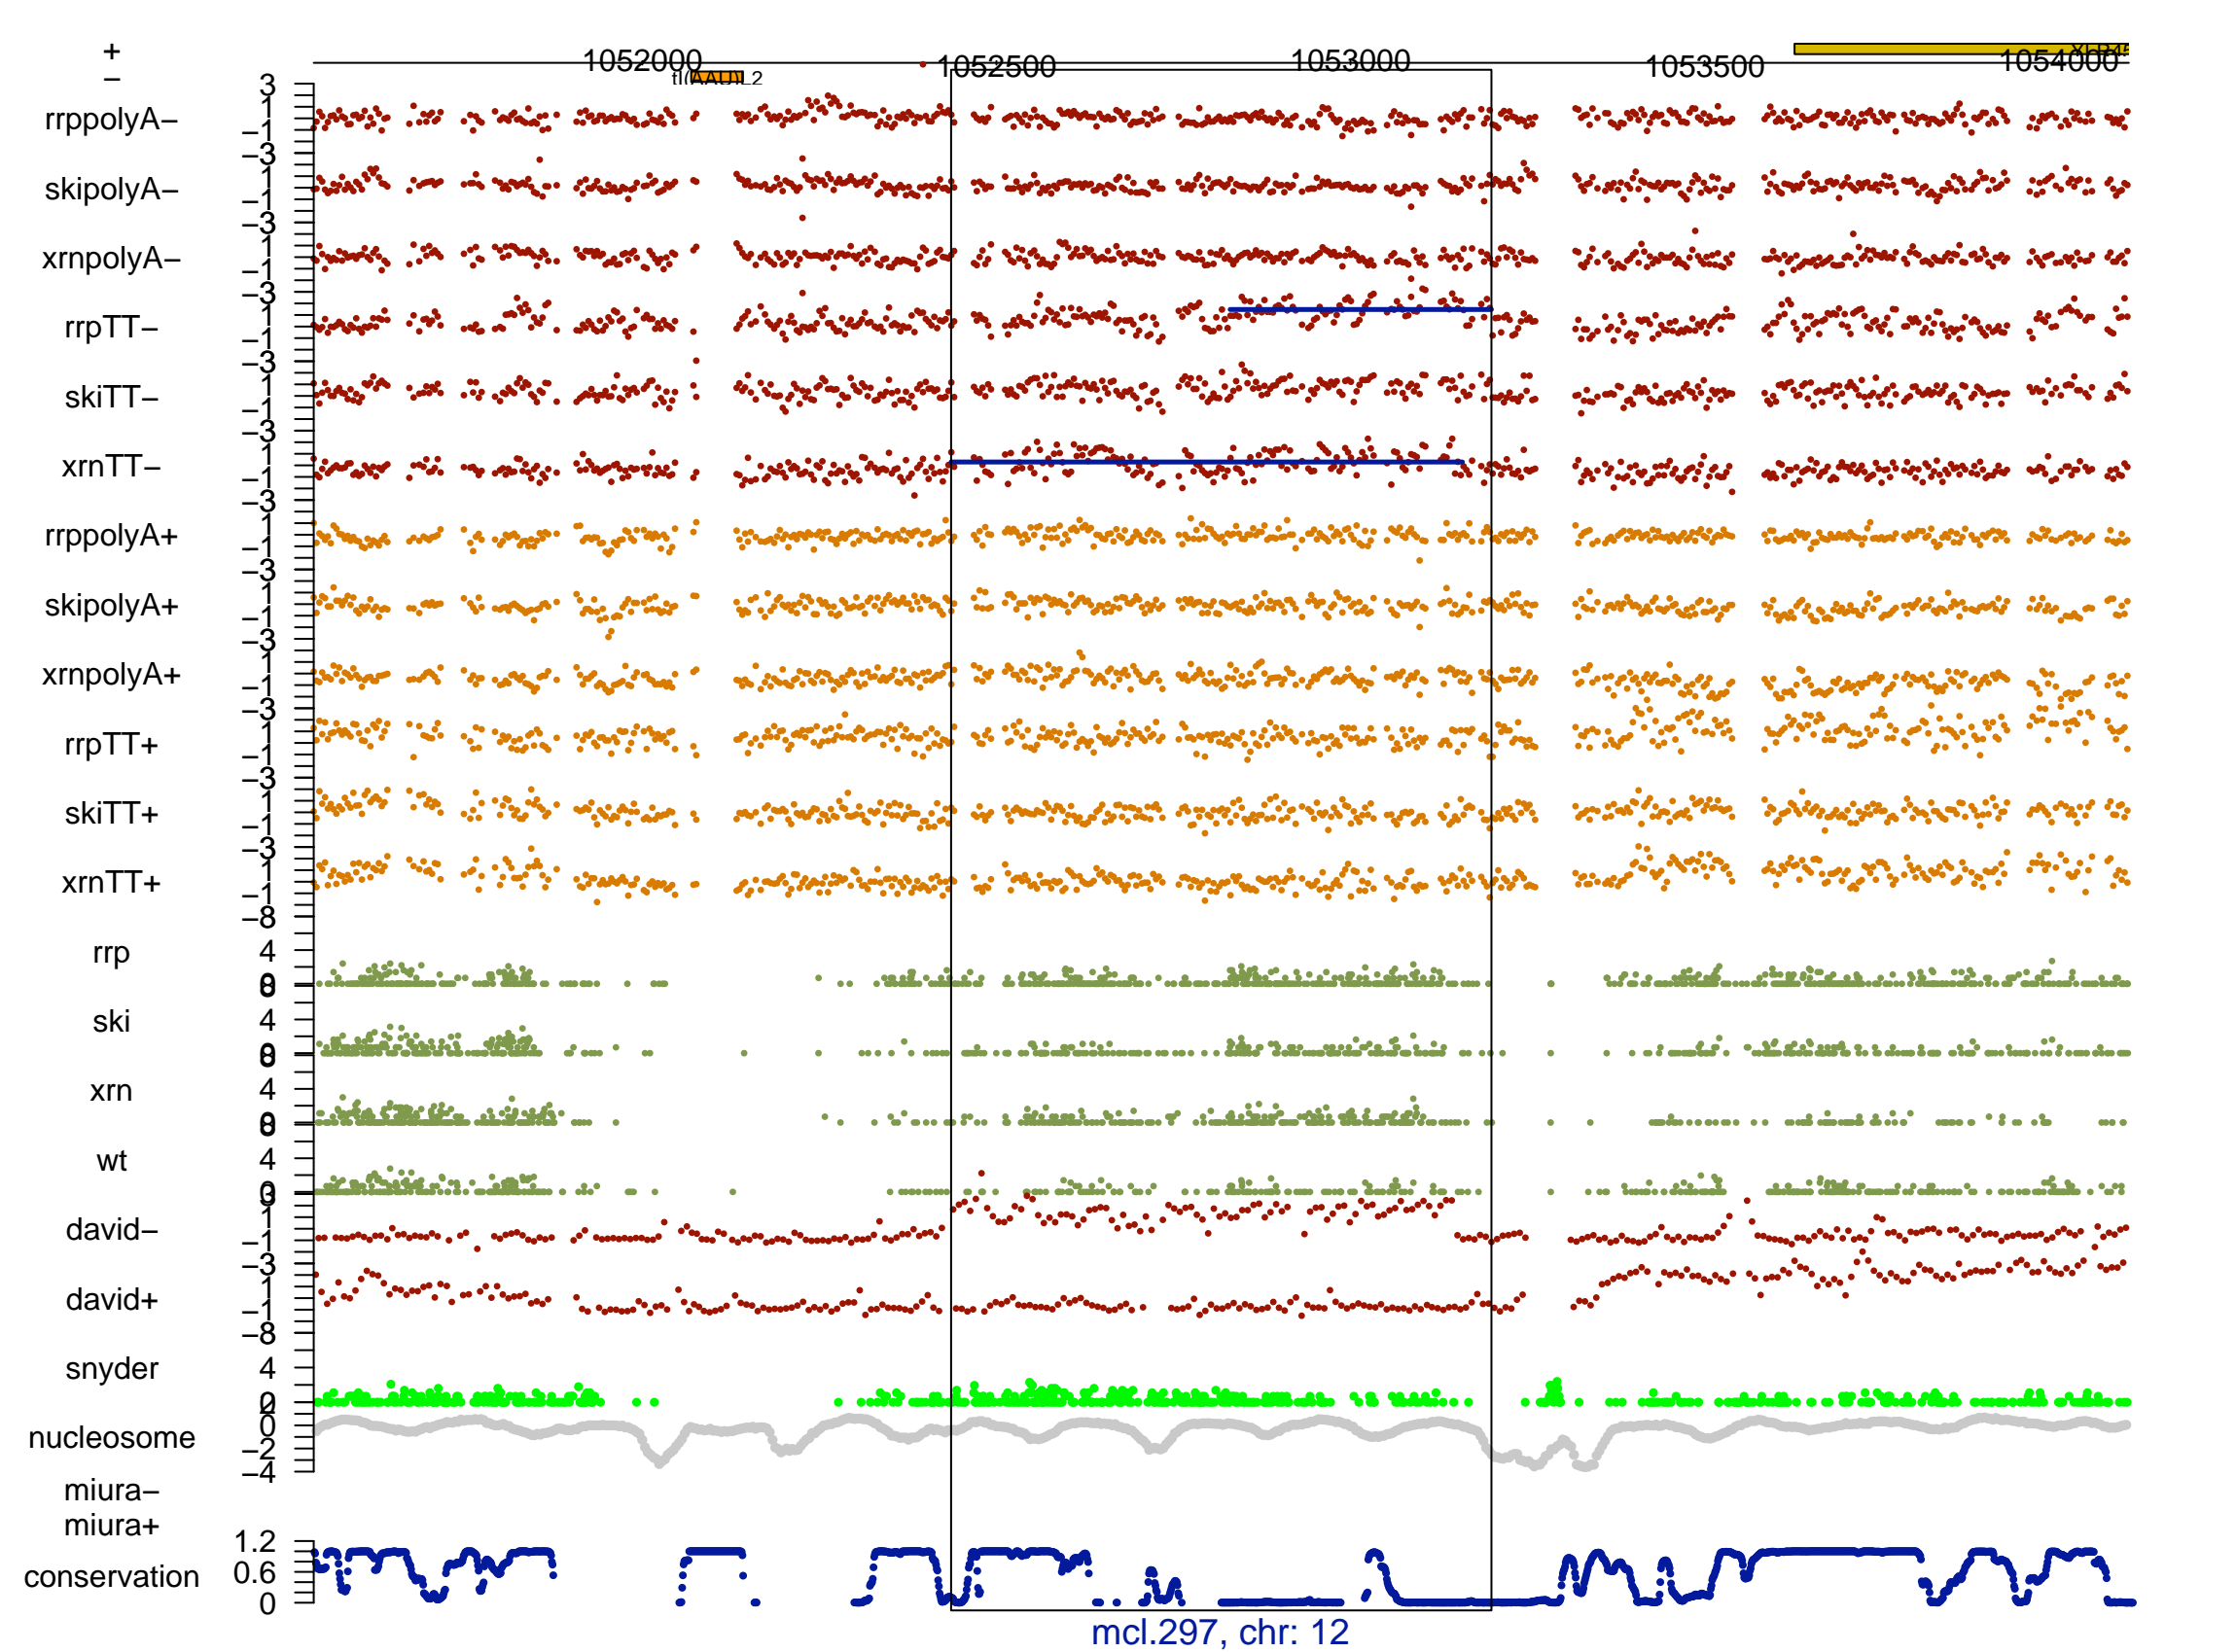

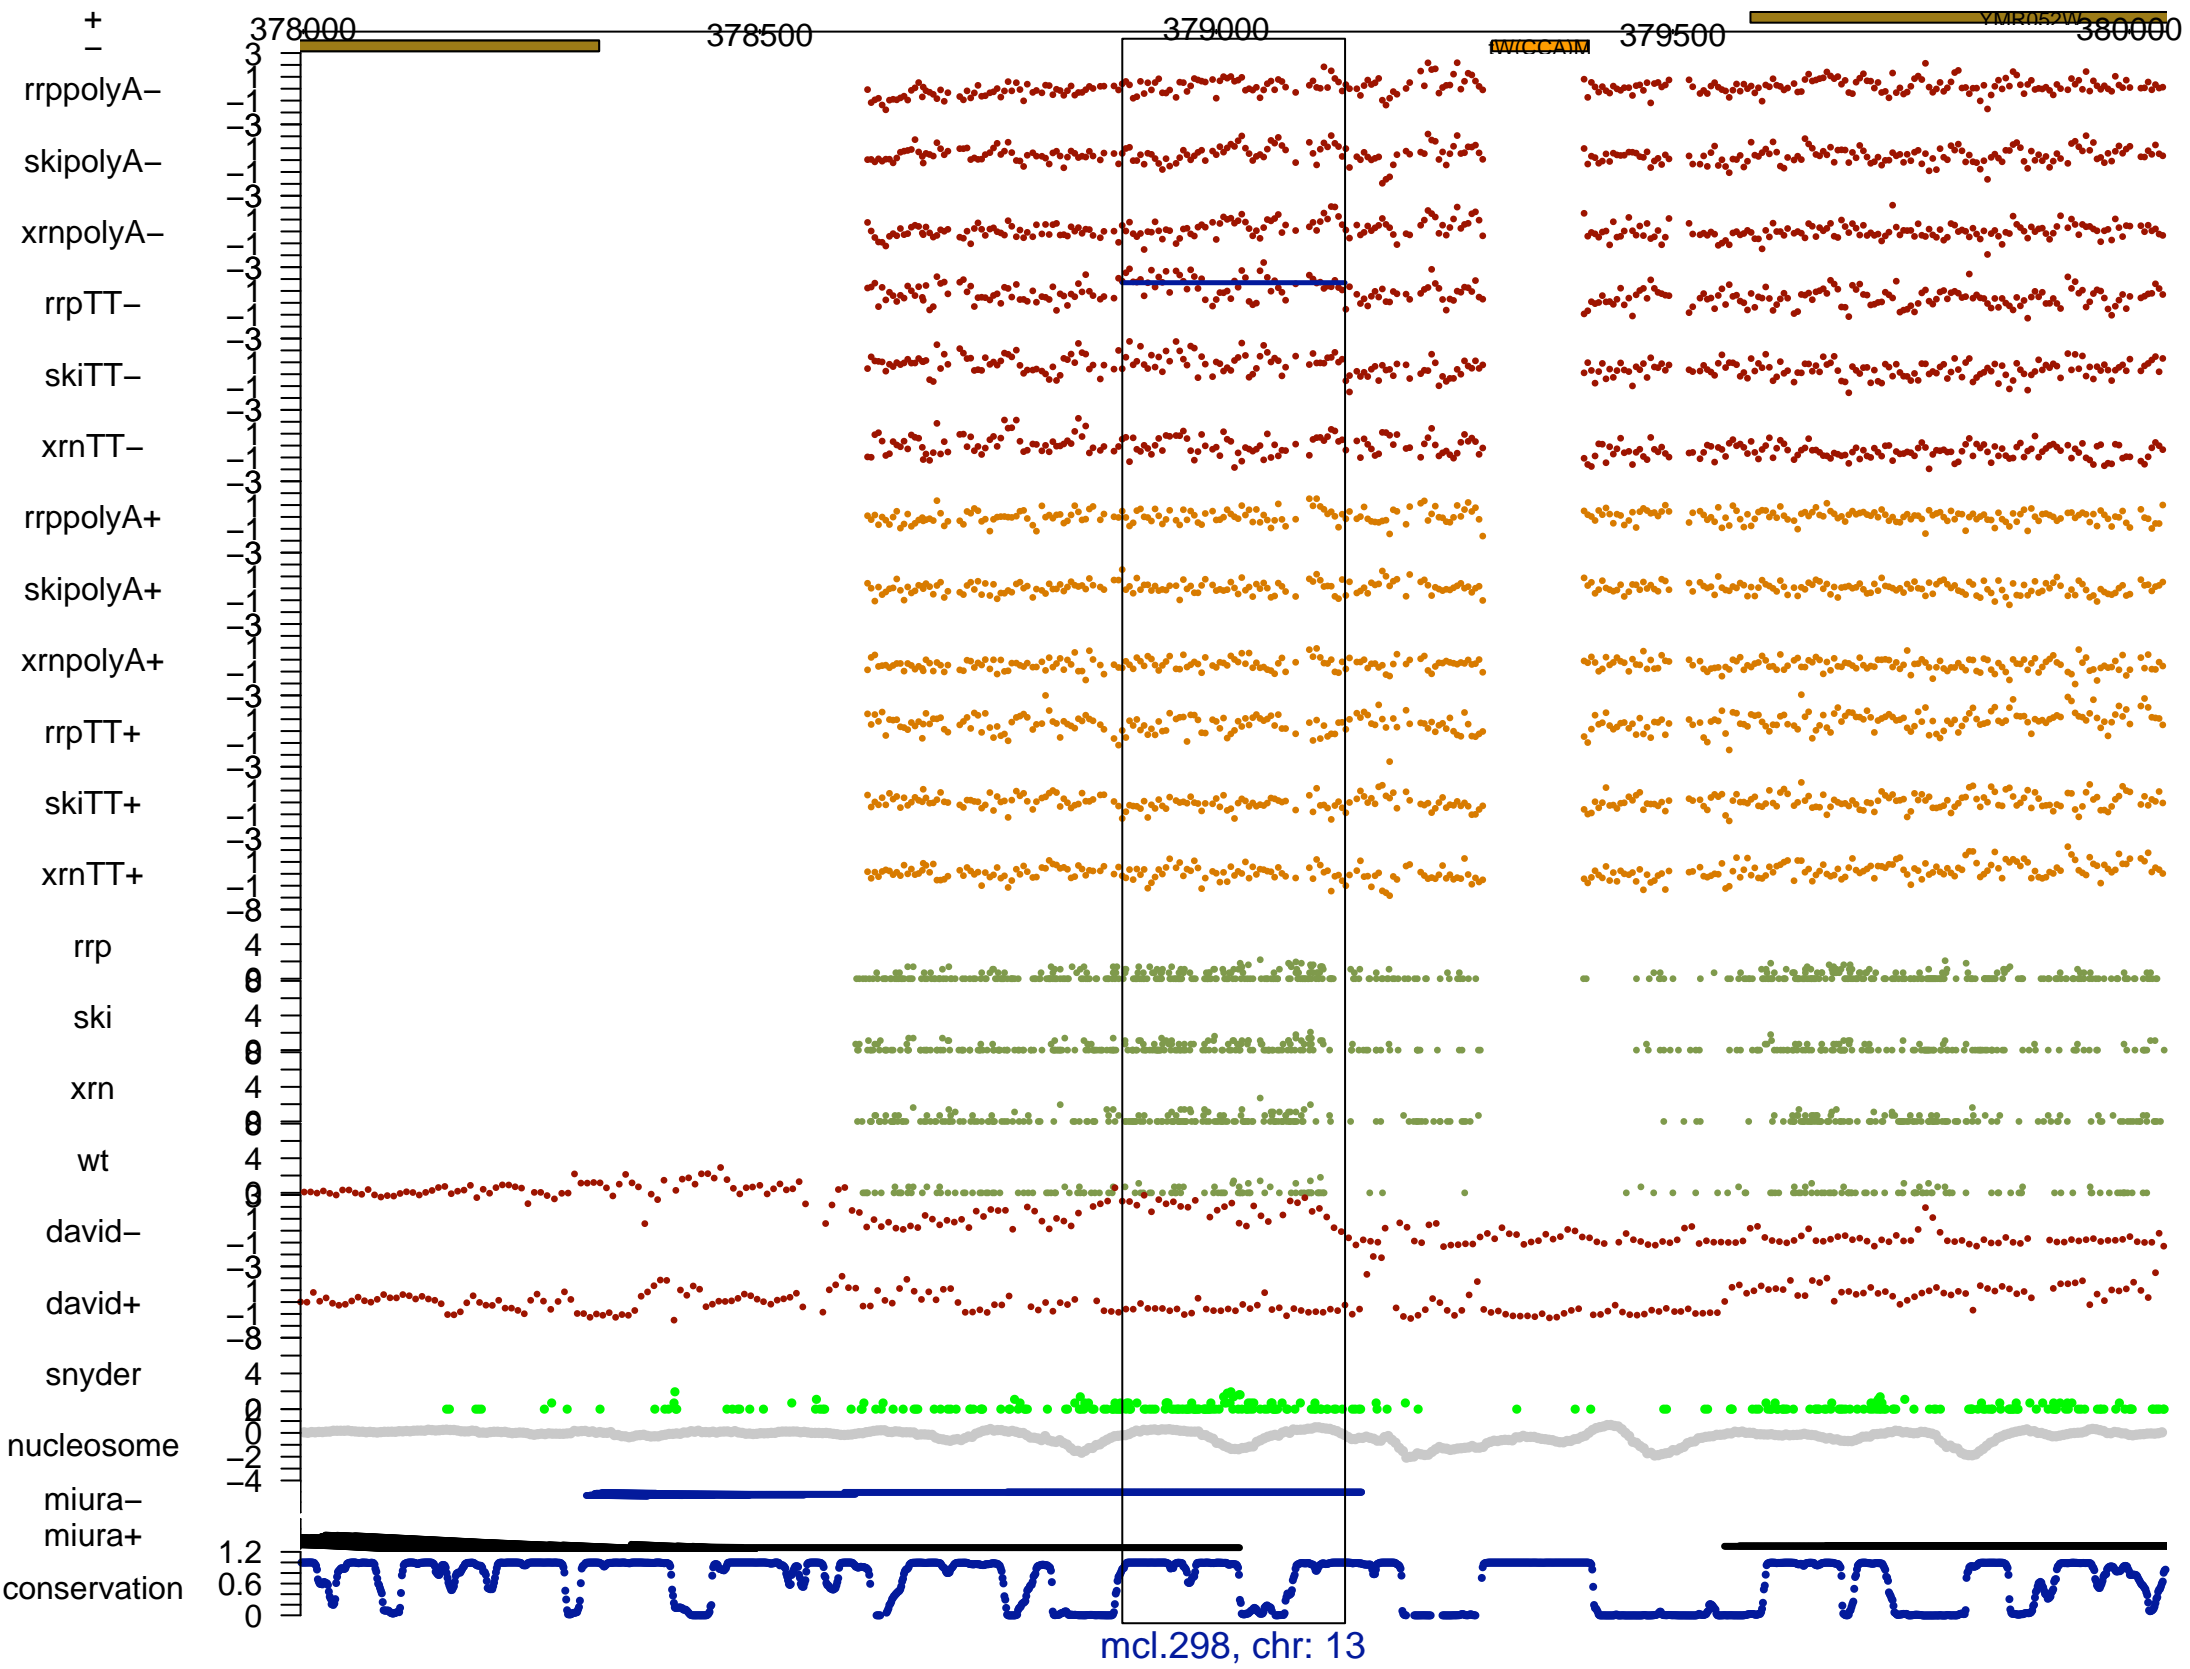





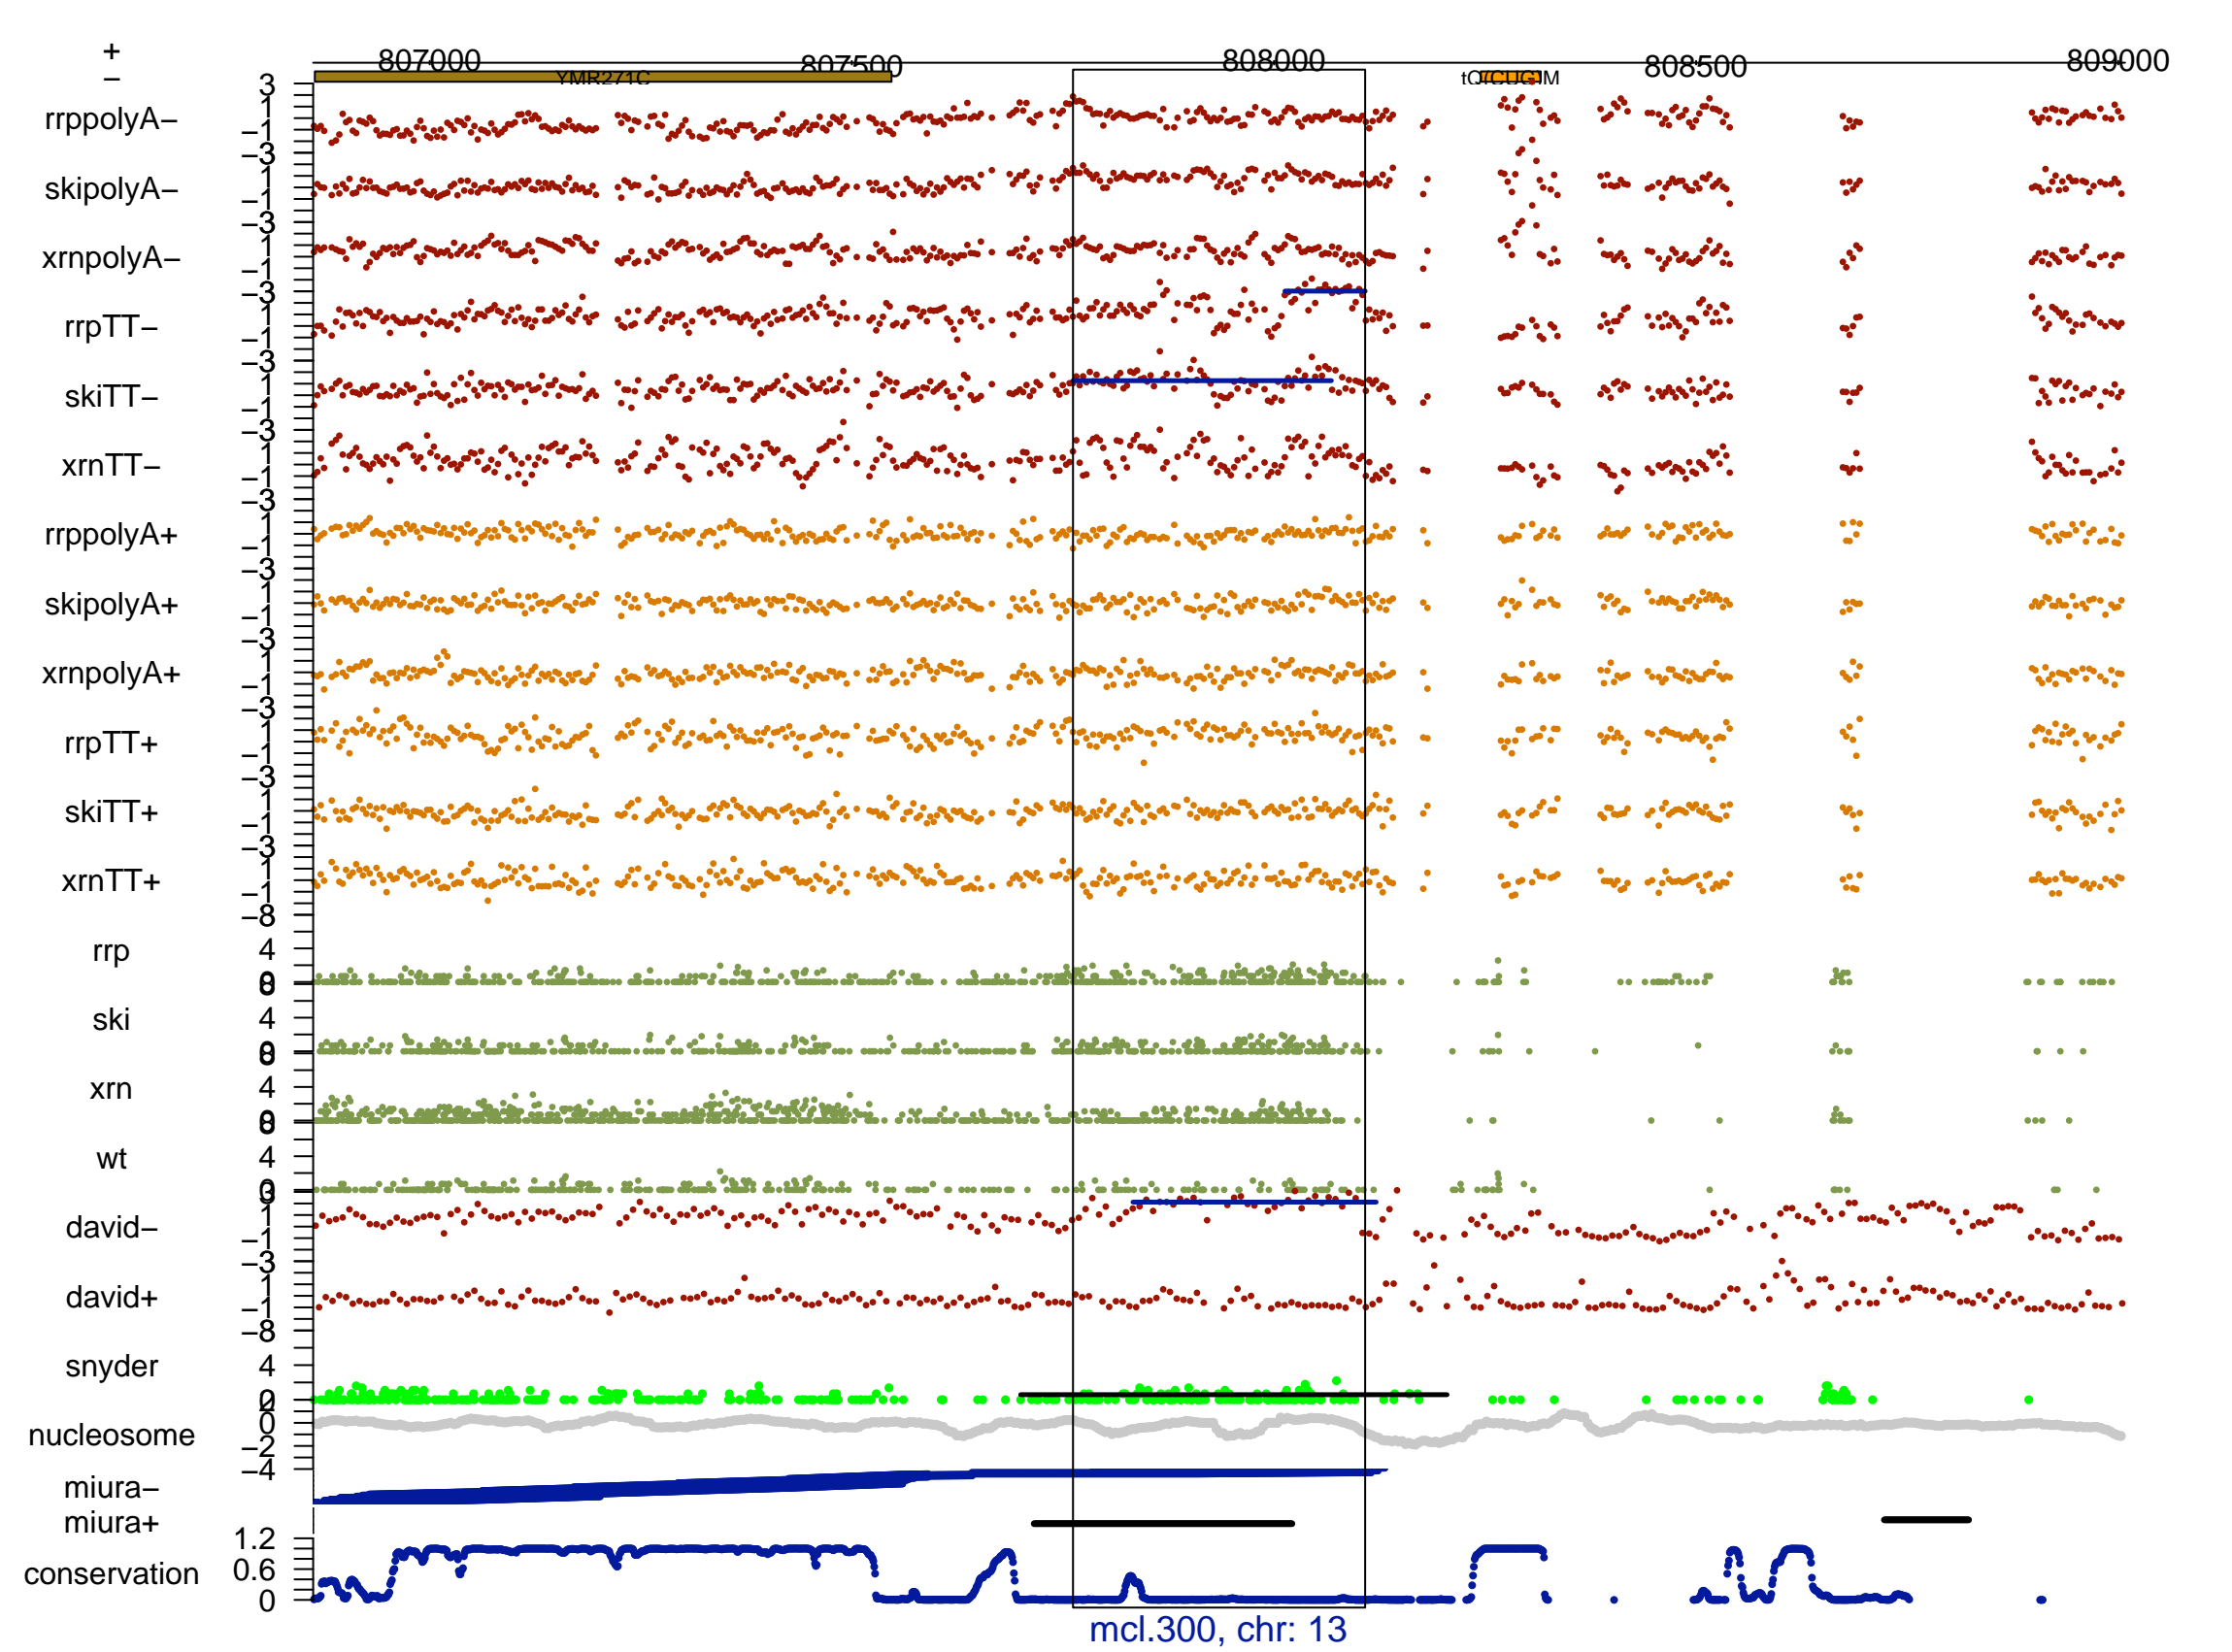

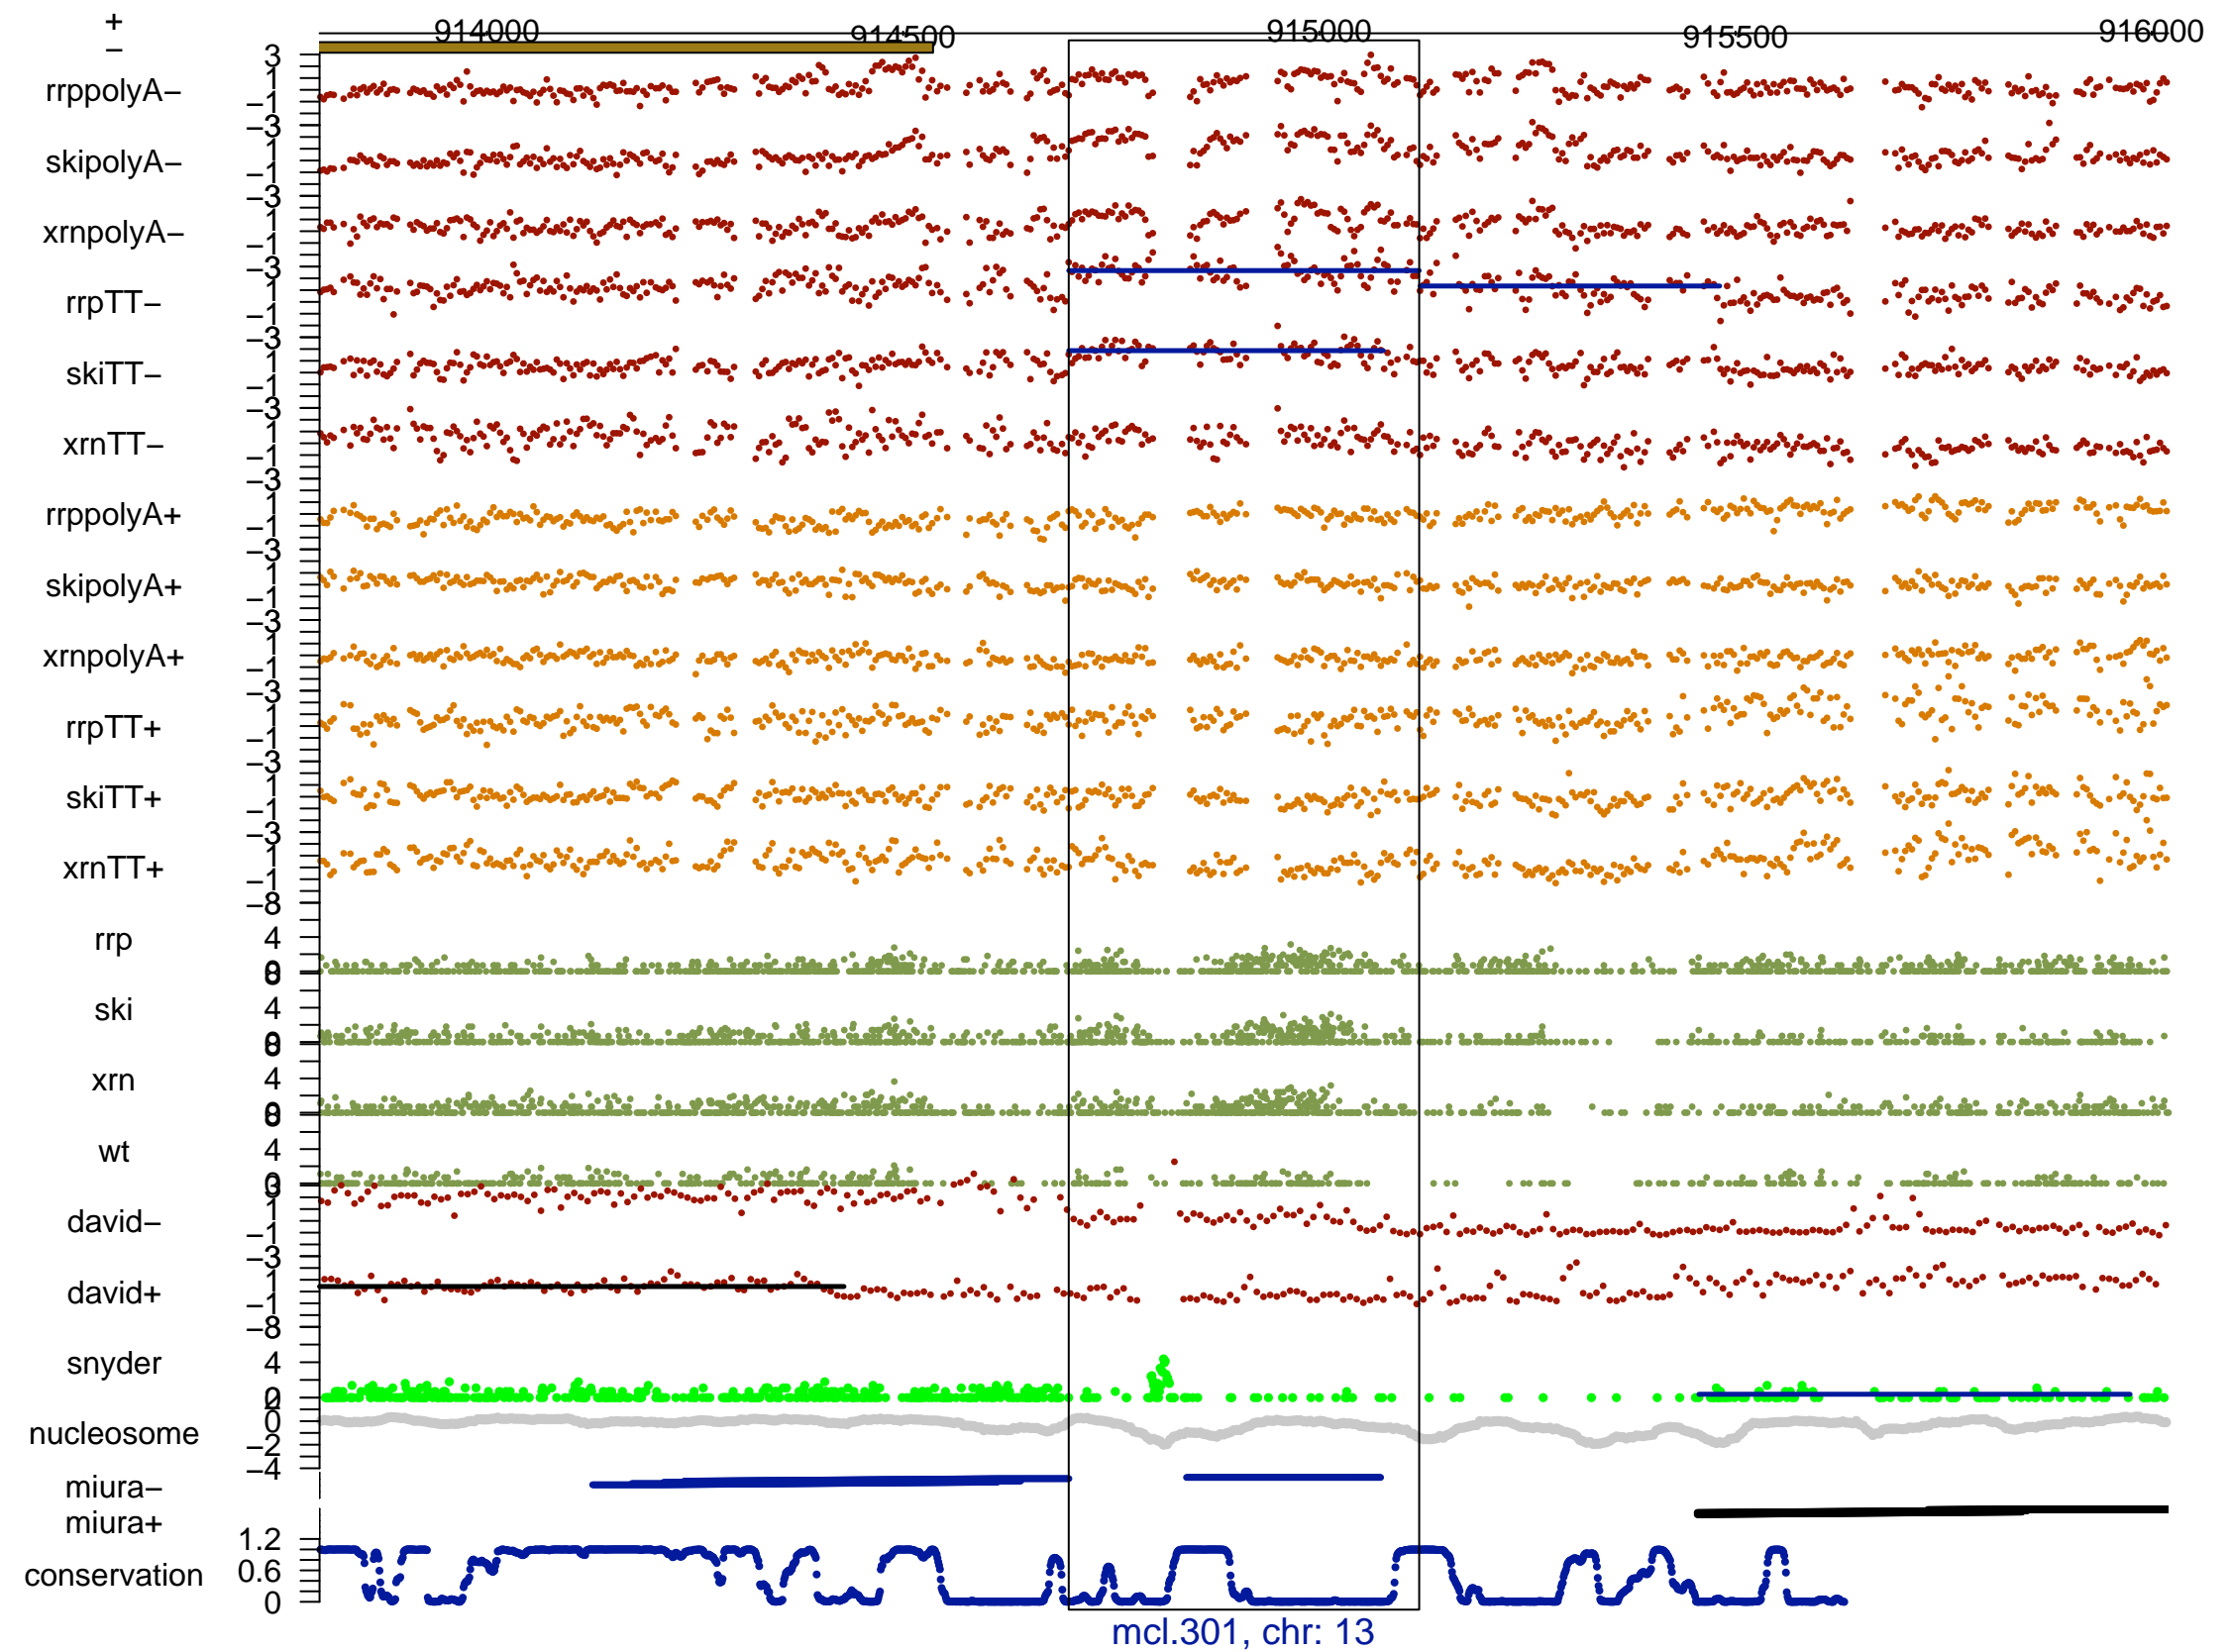

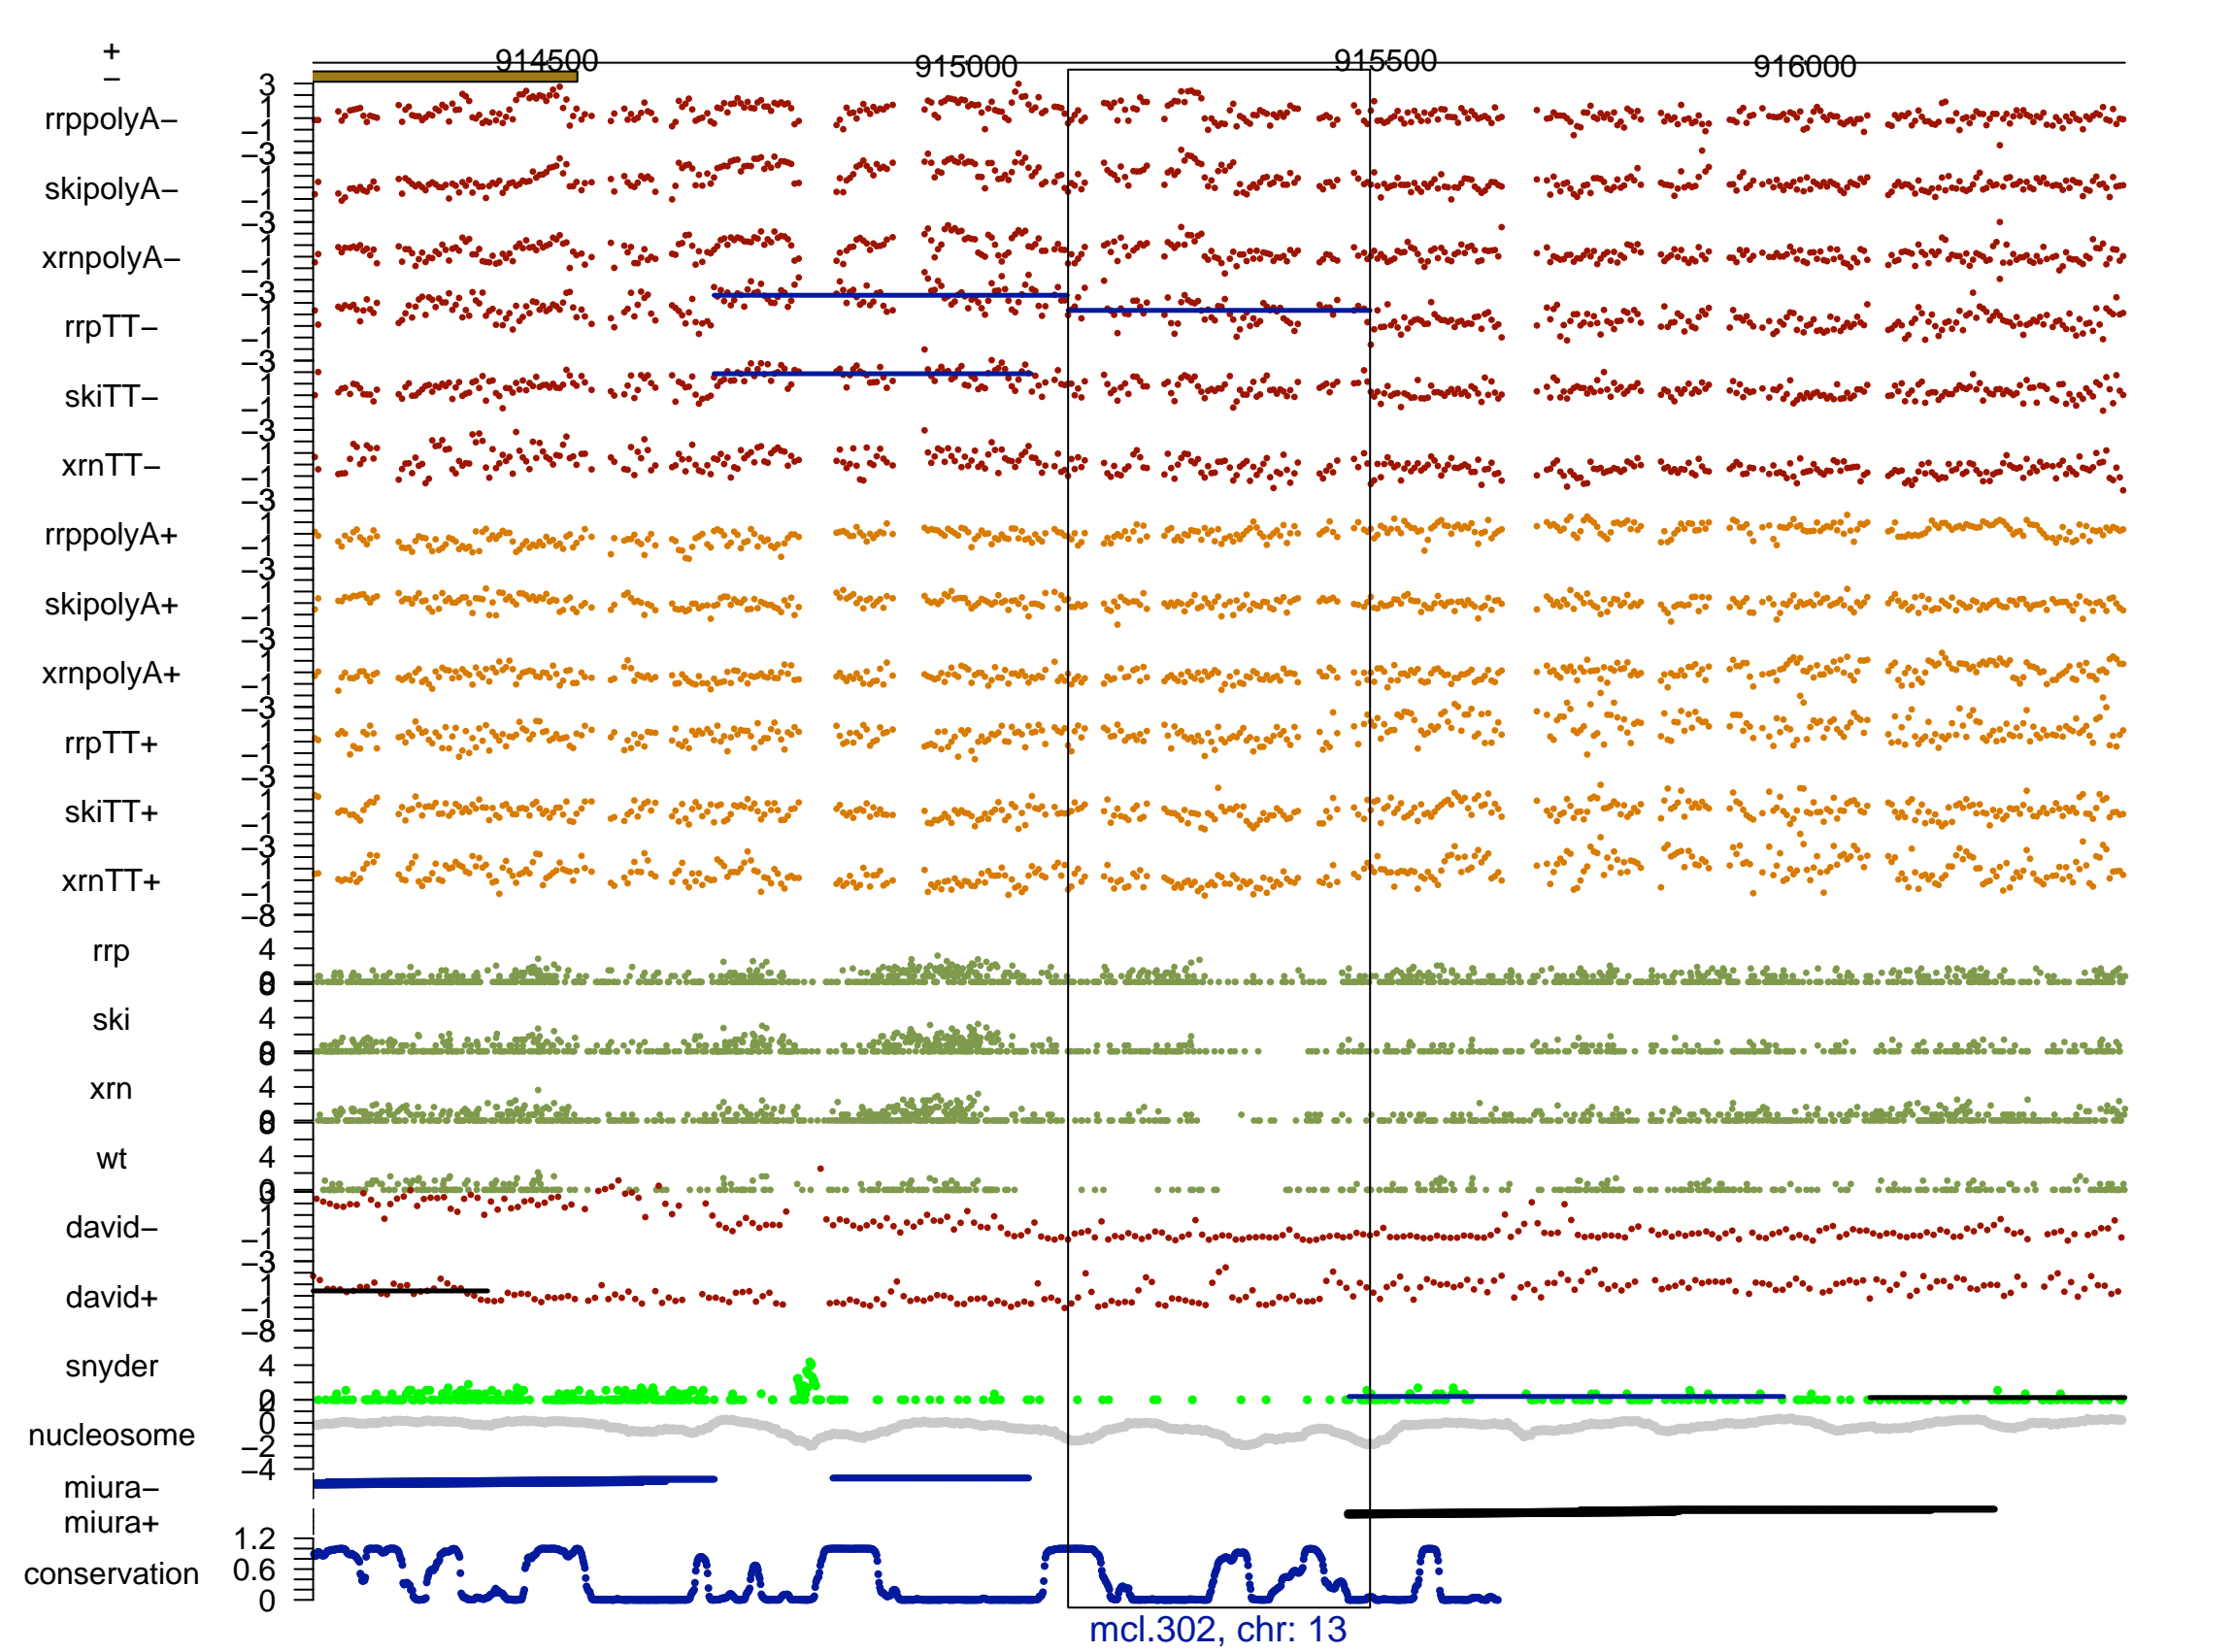

mcl.302, chr: 13

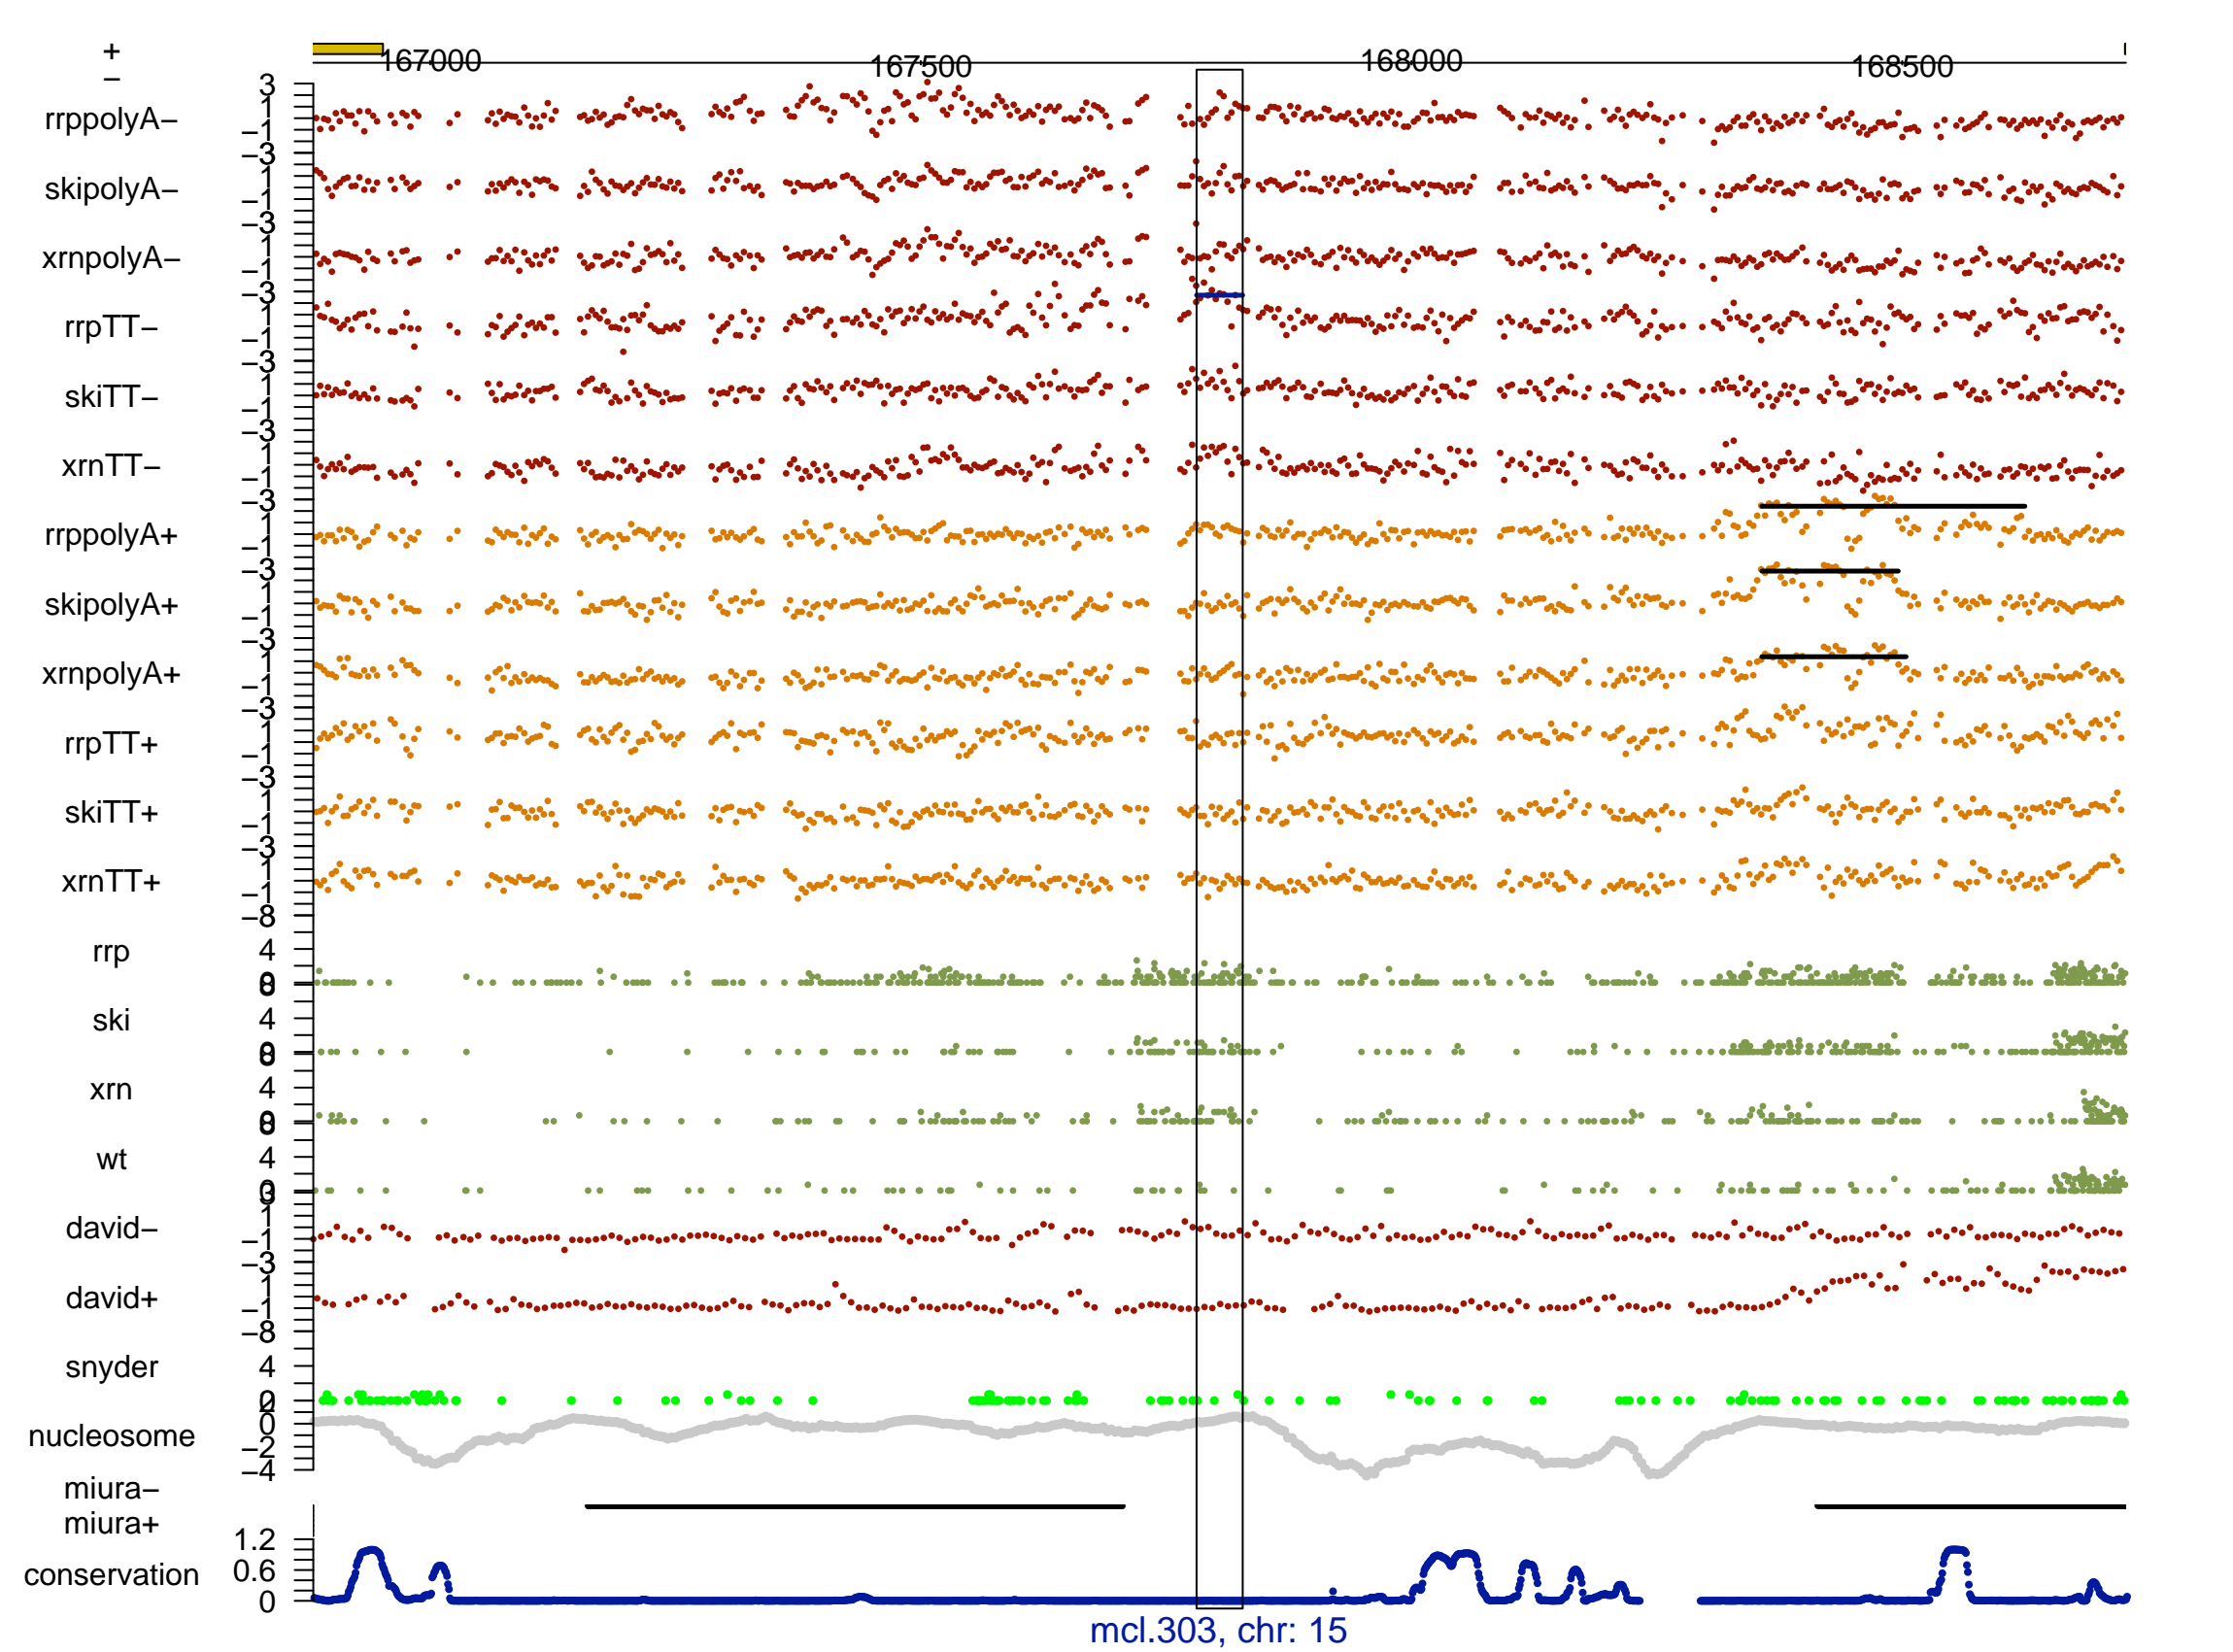



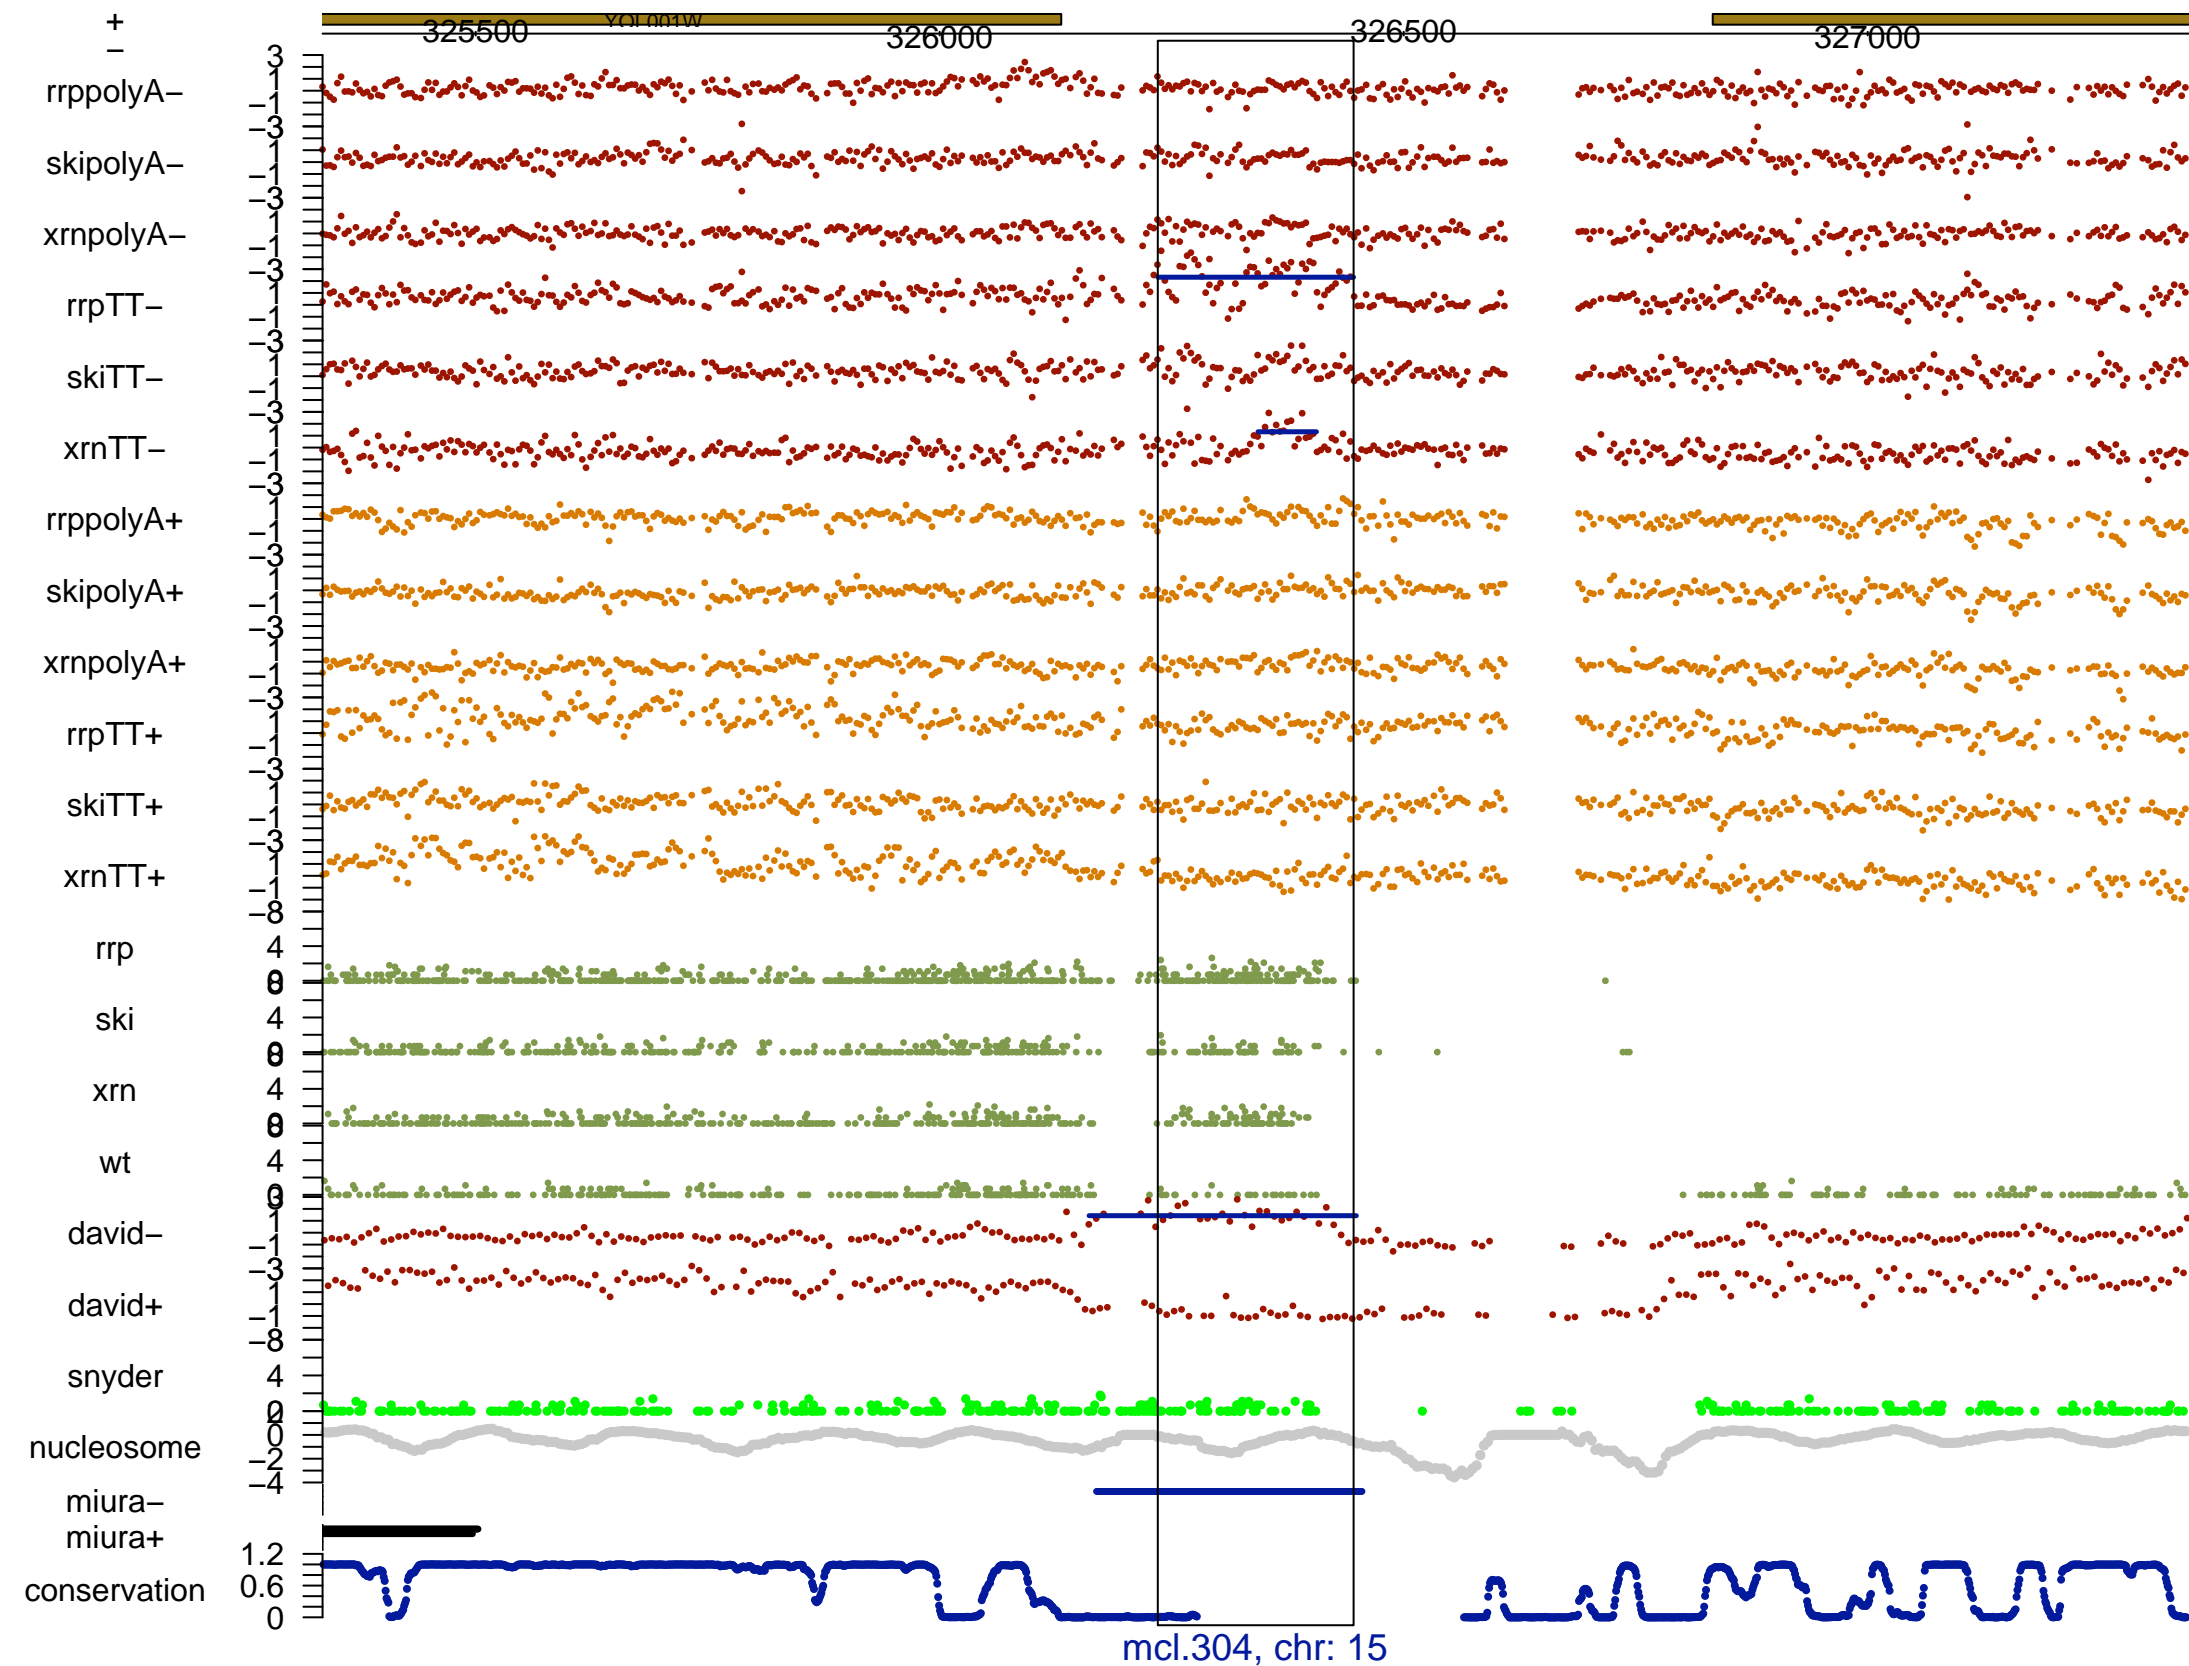

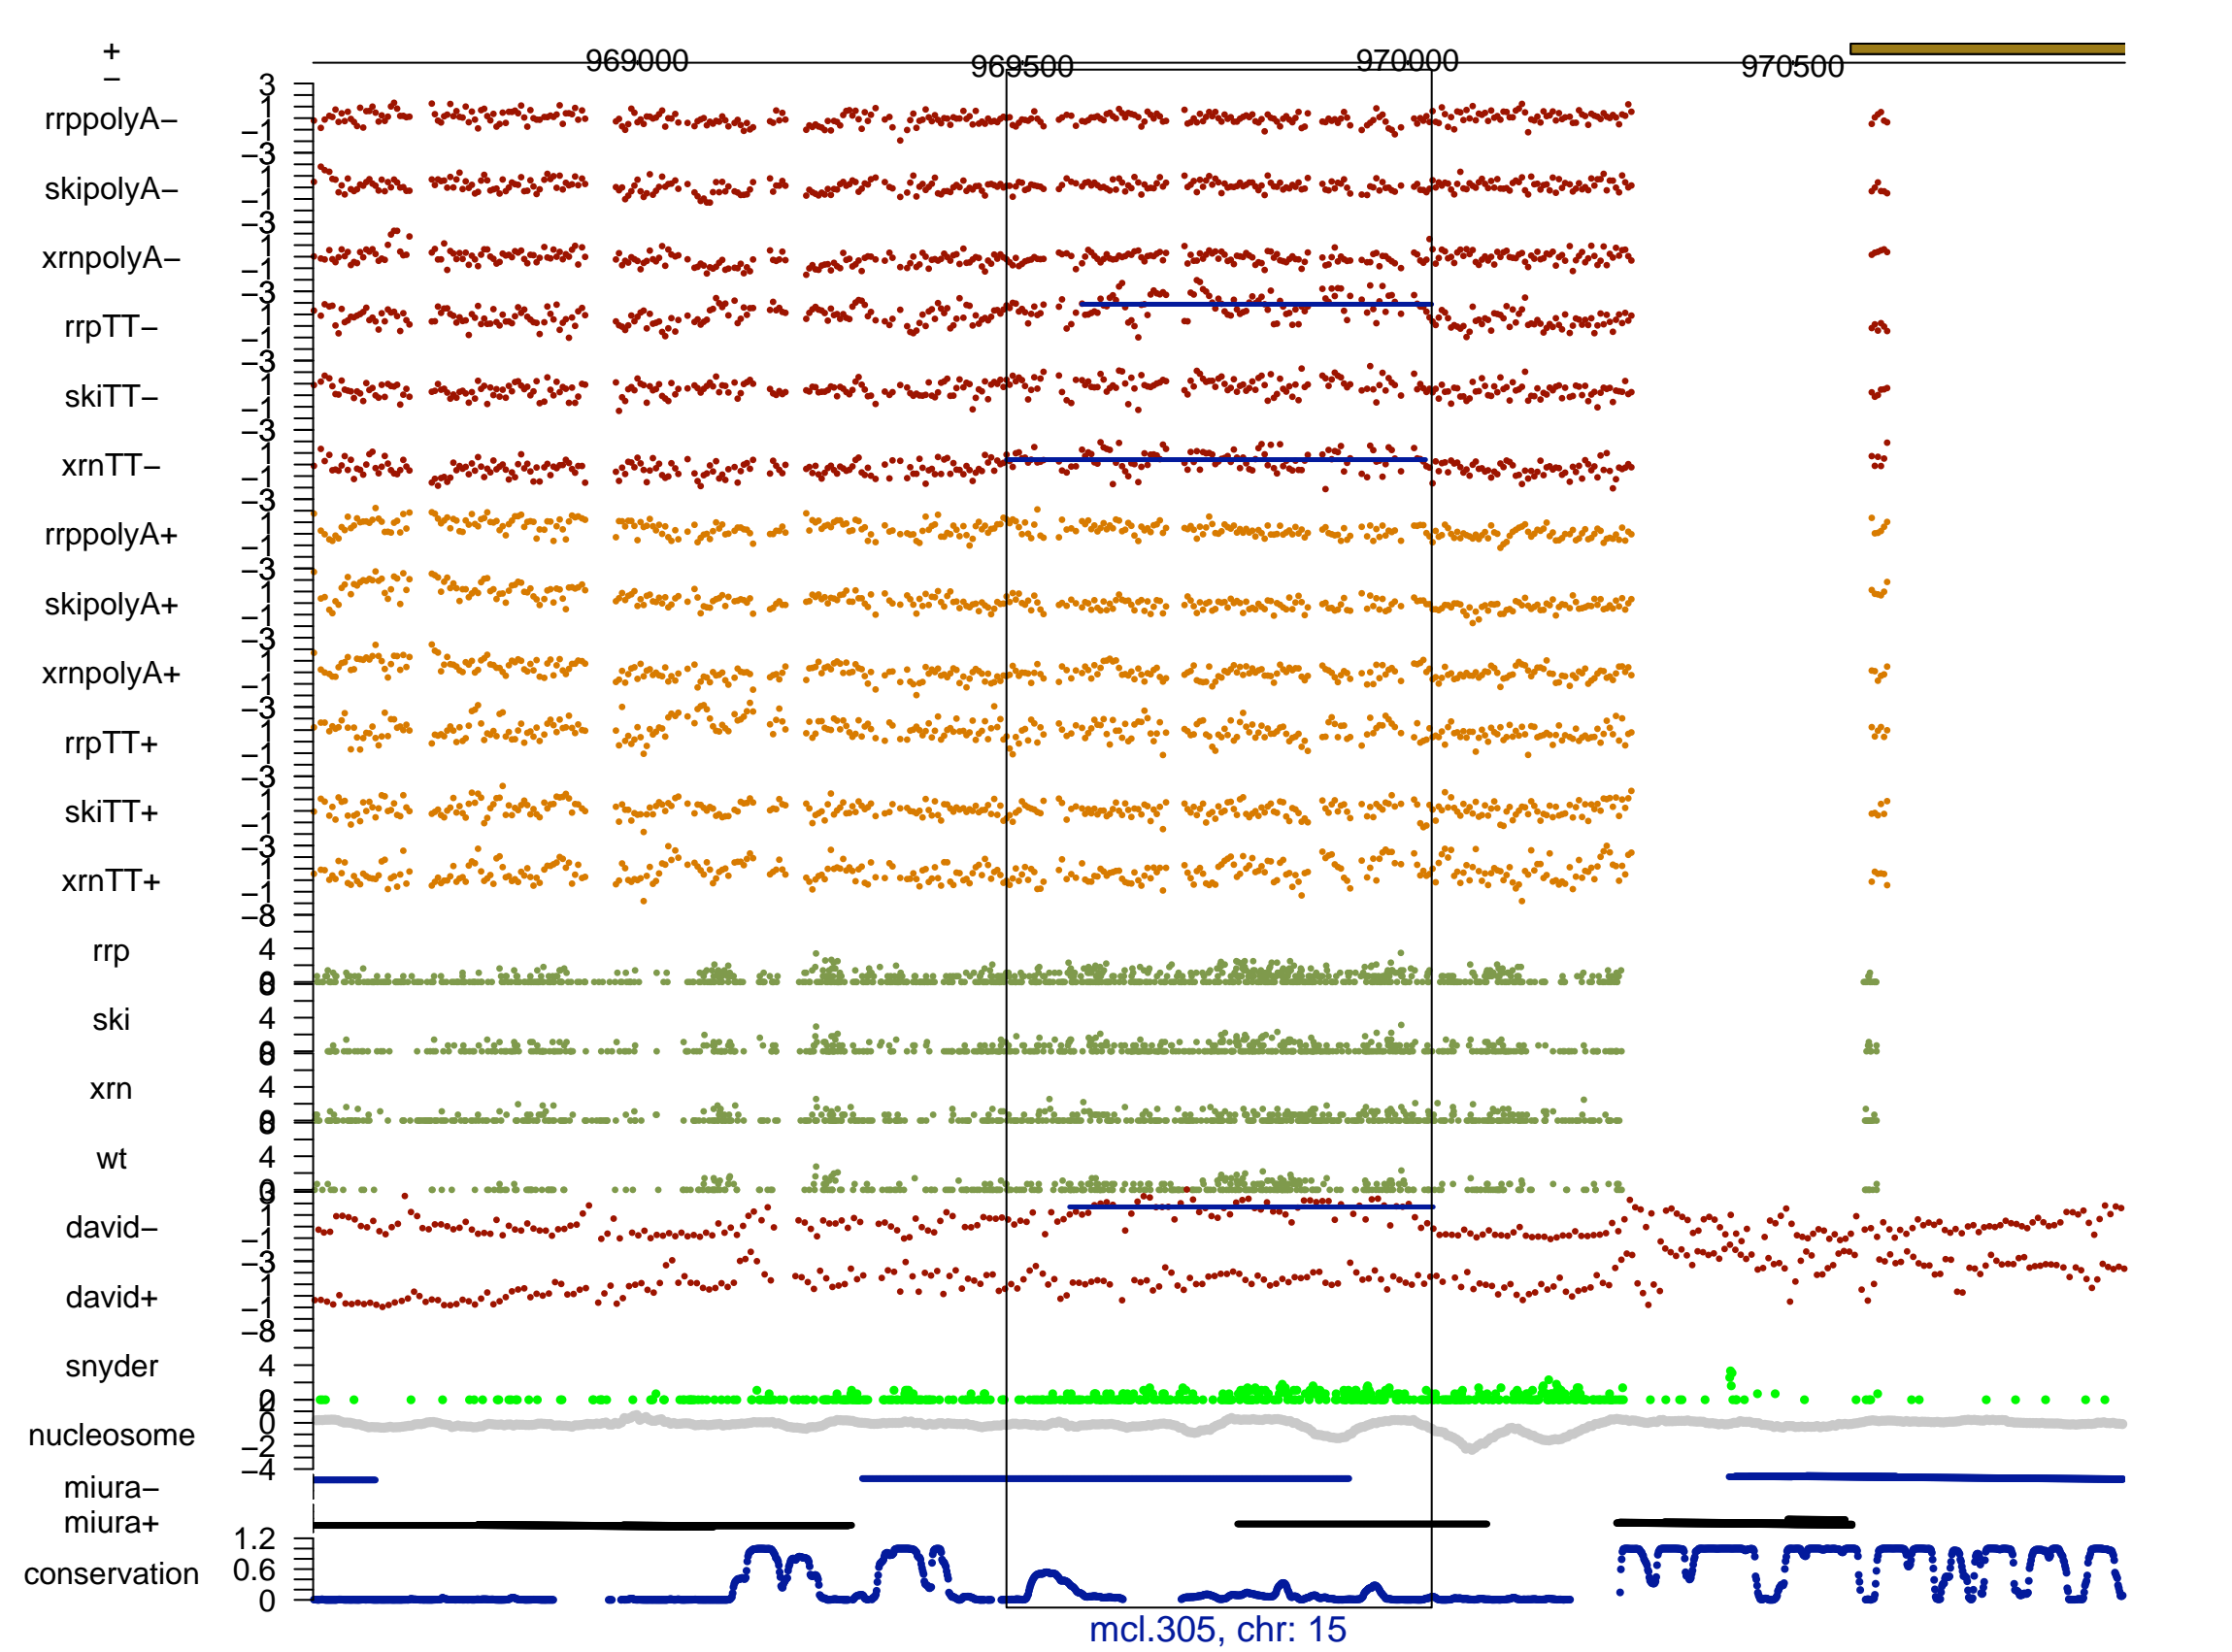

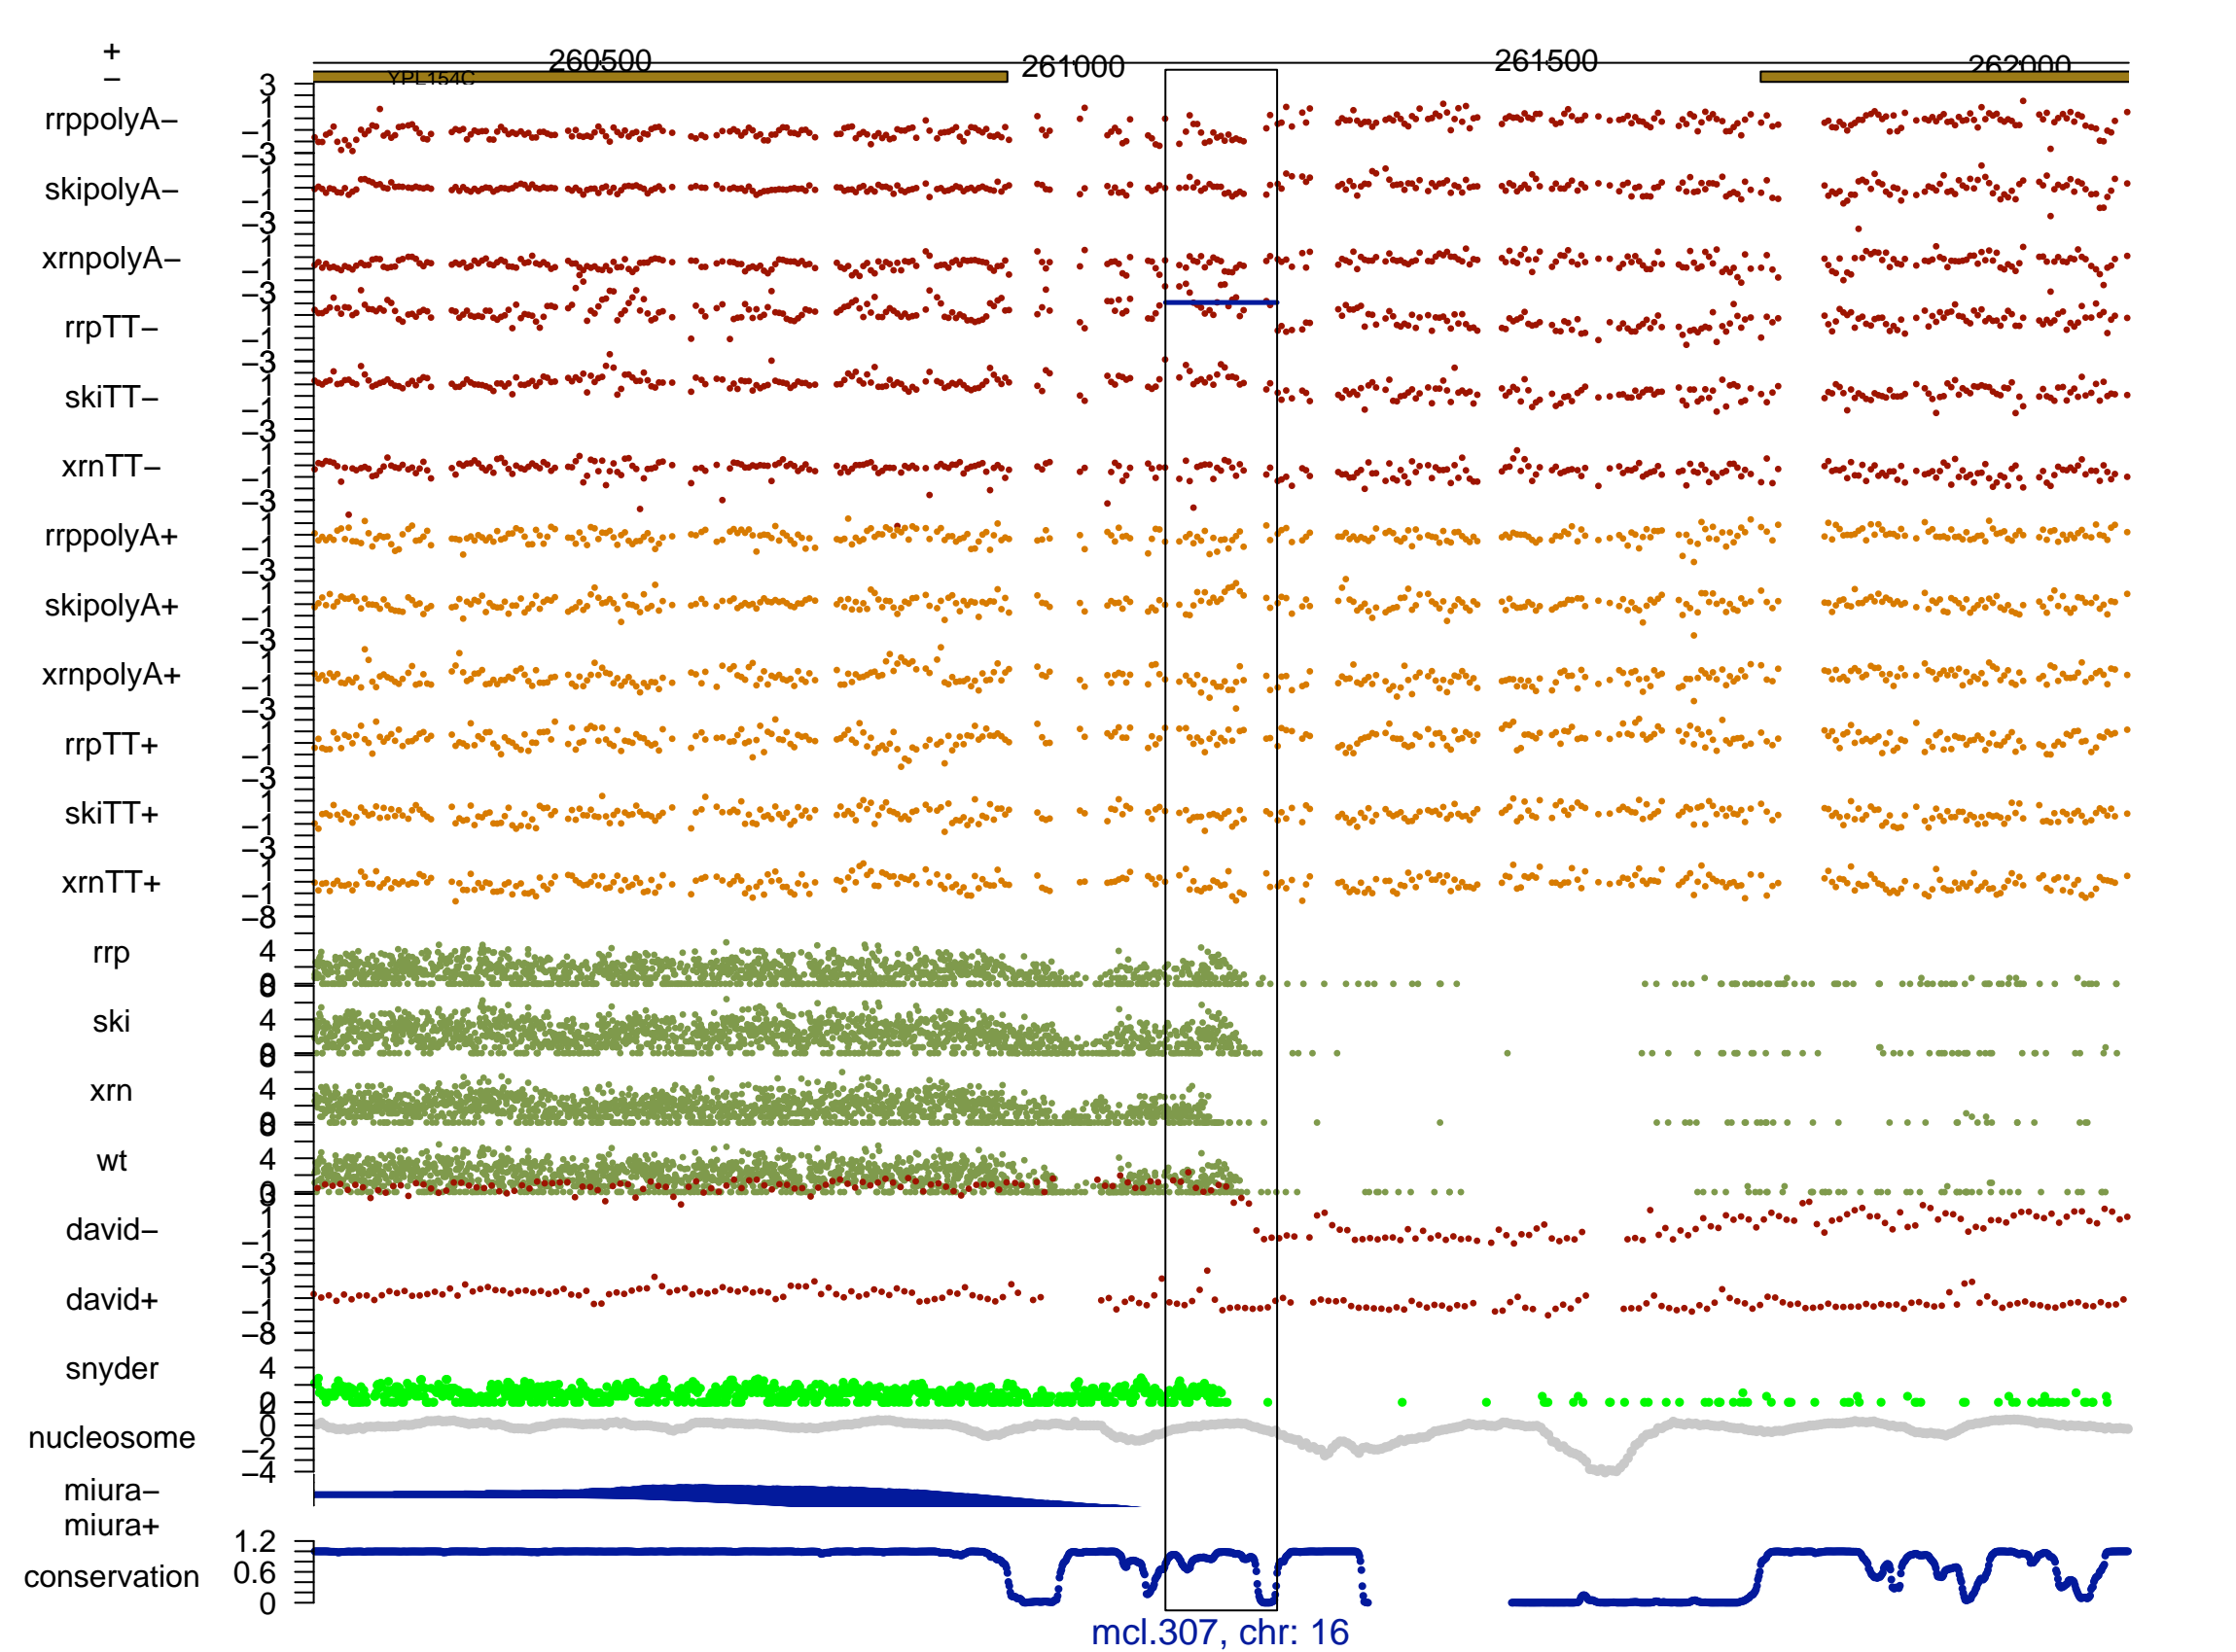





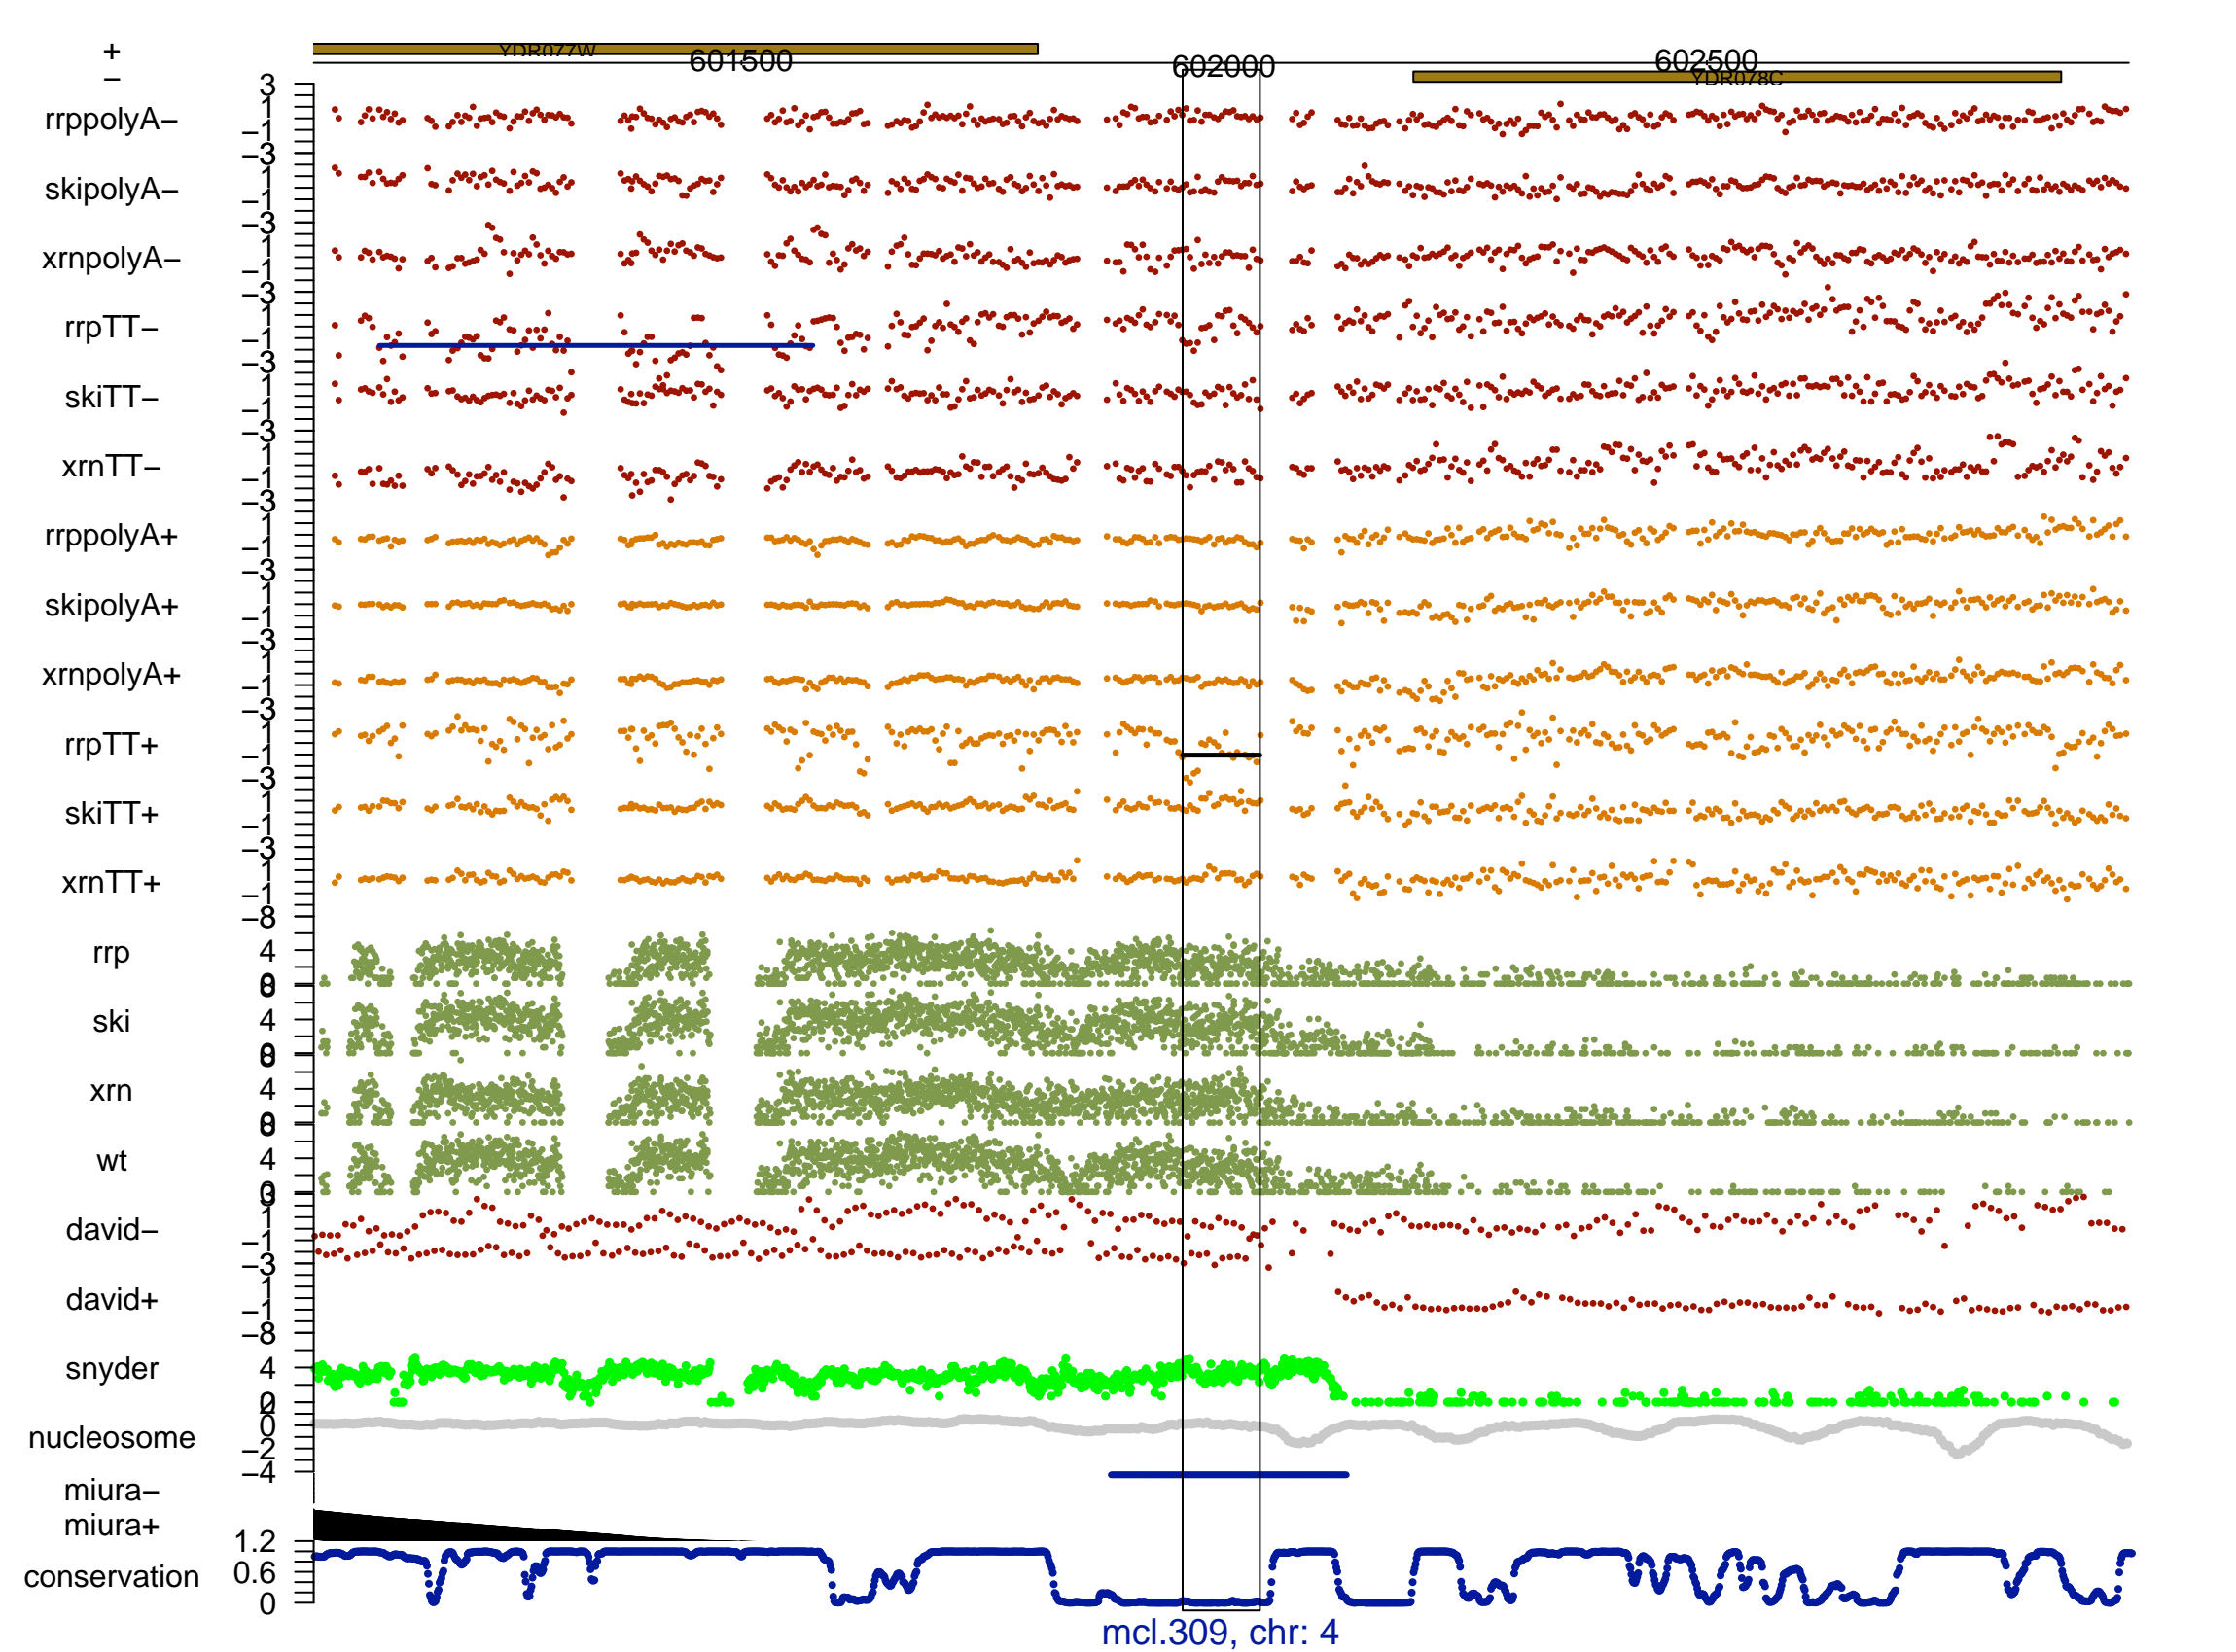

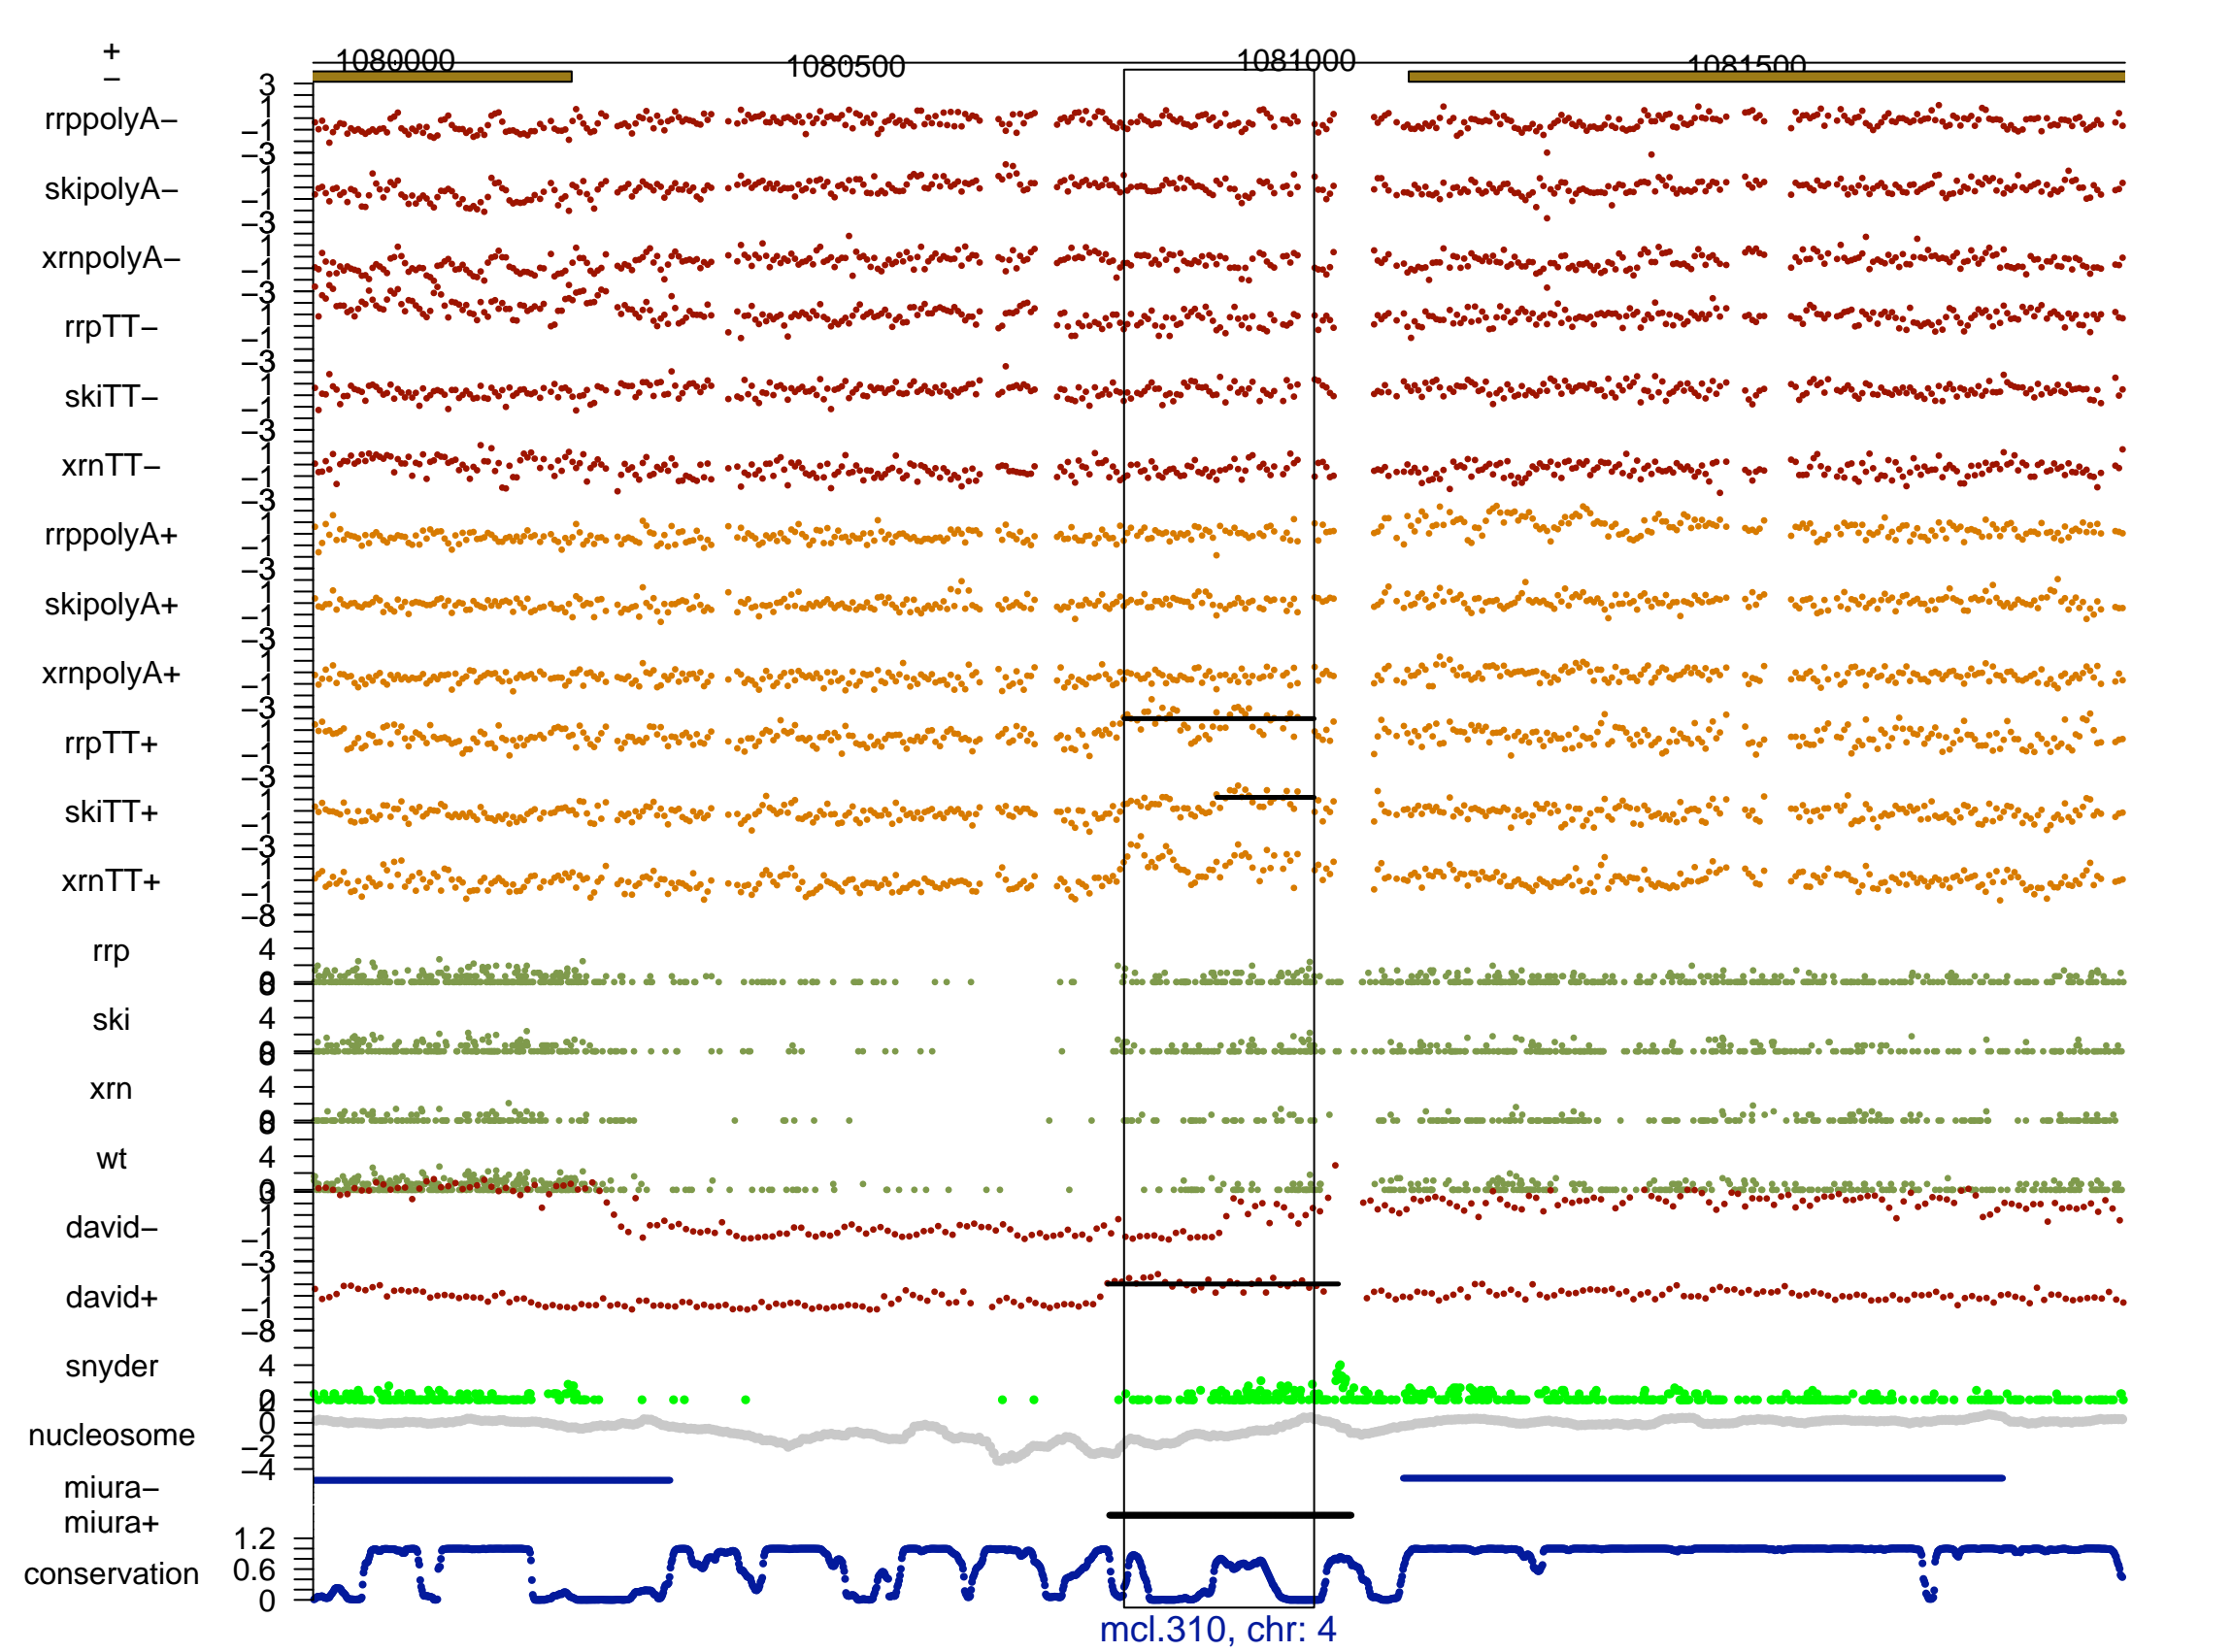

mcl.310, chr: 4



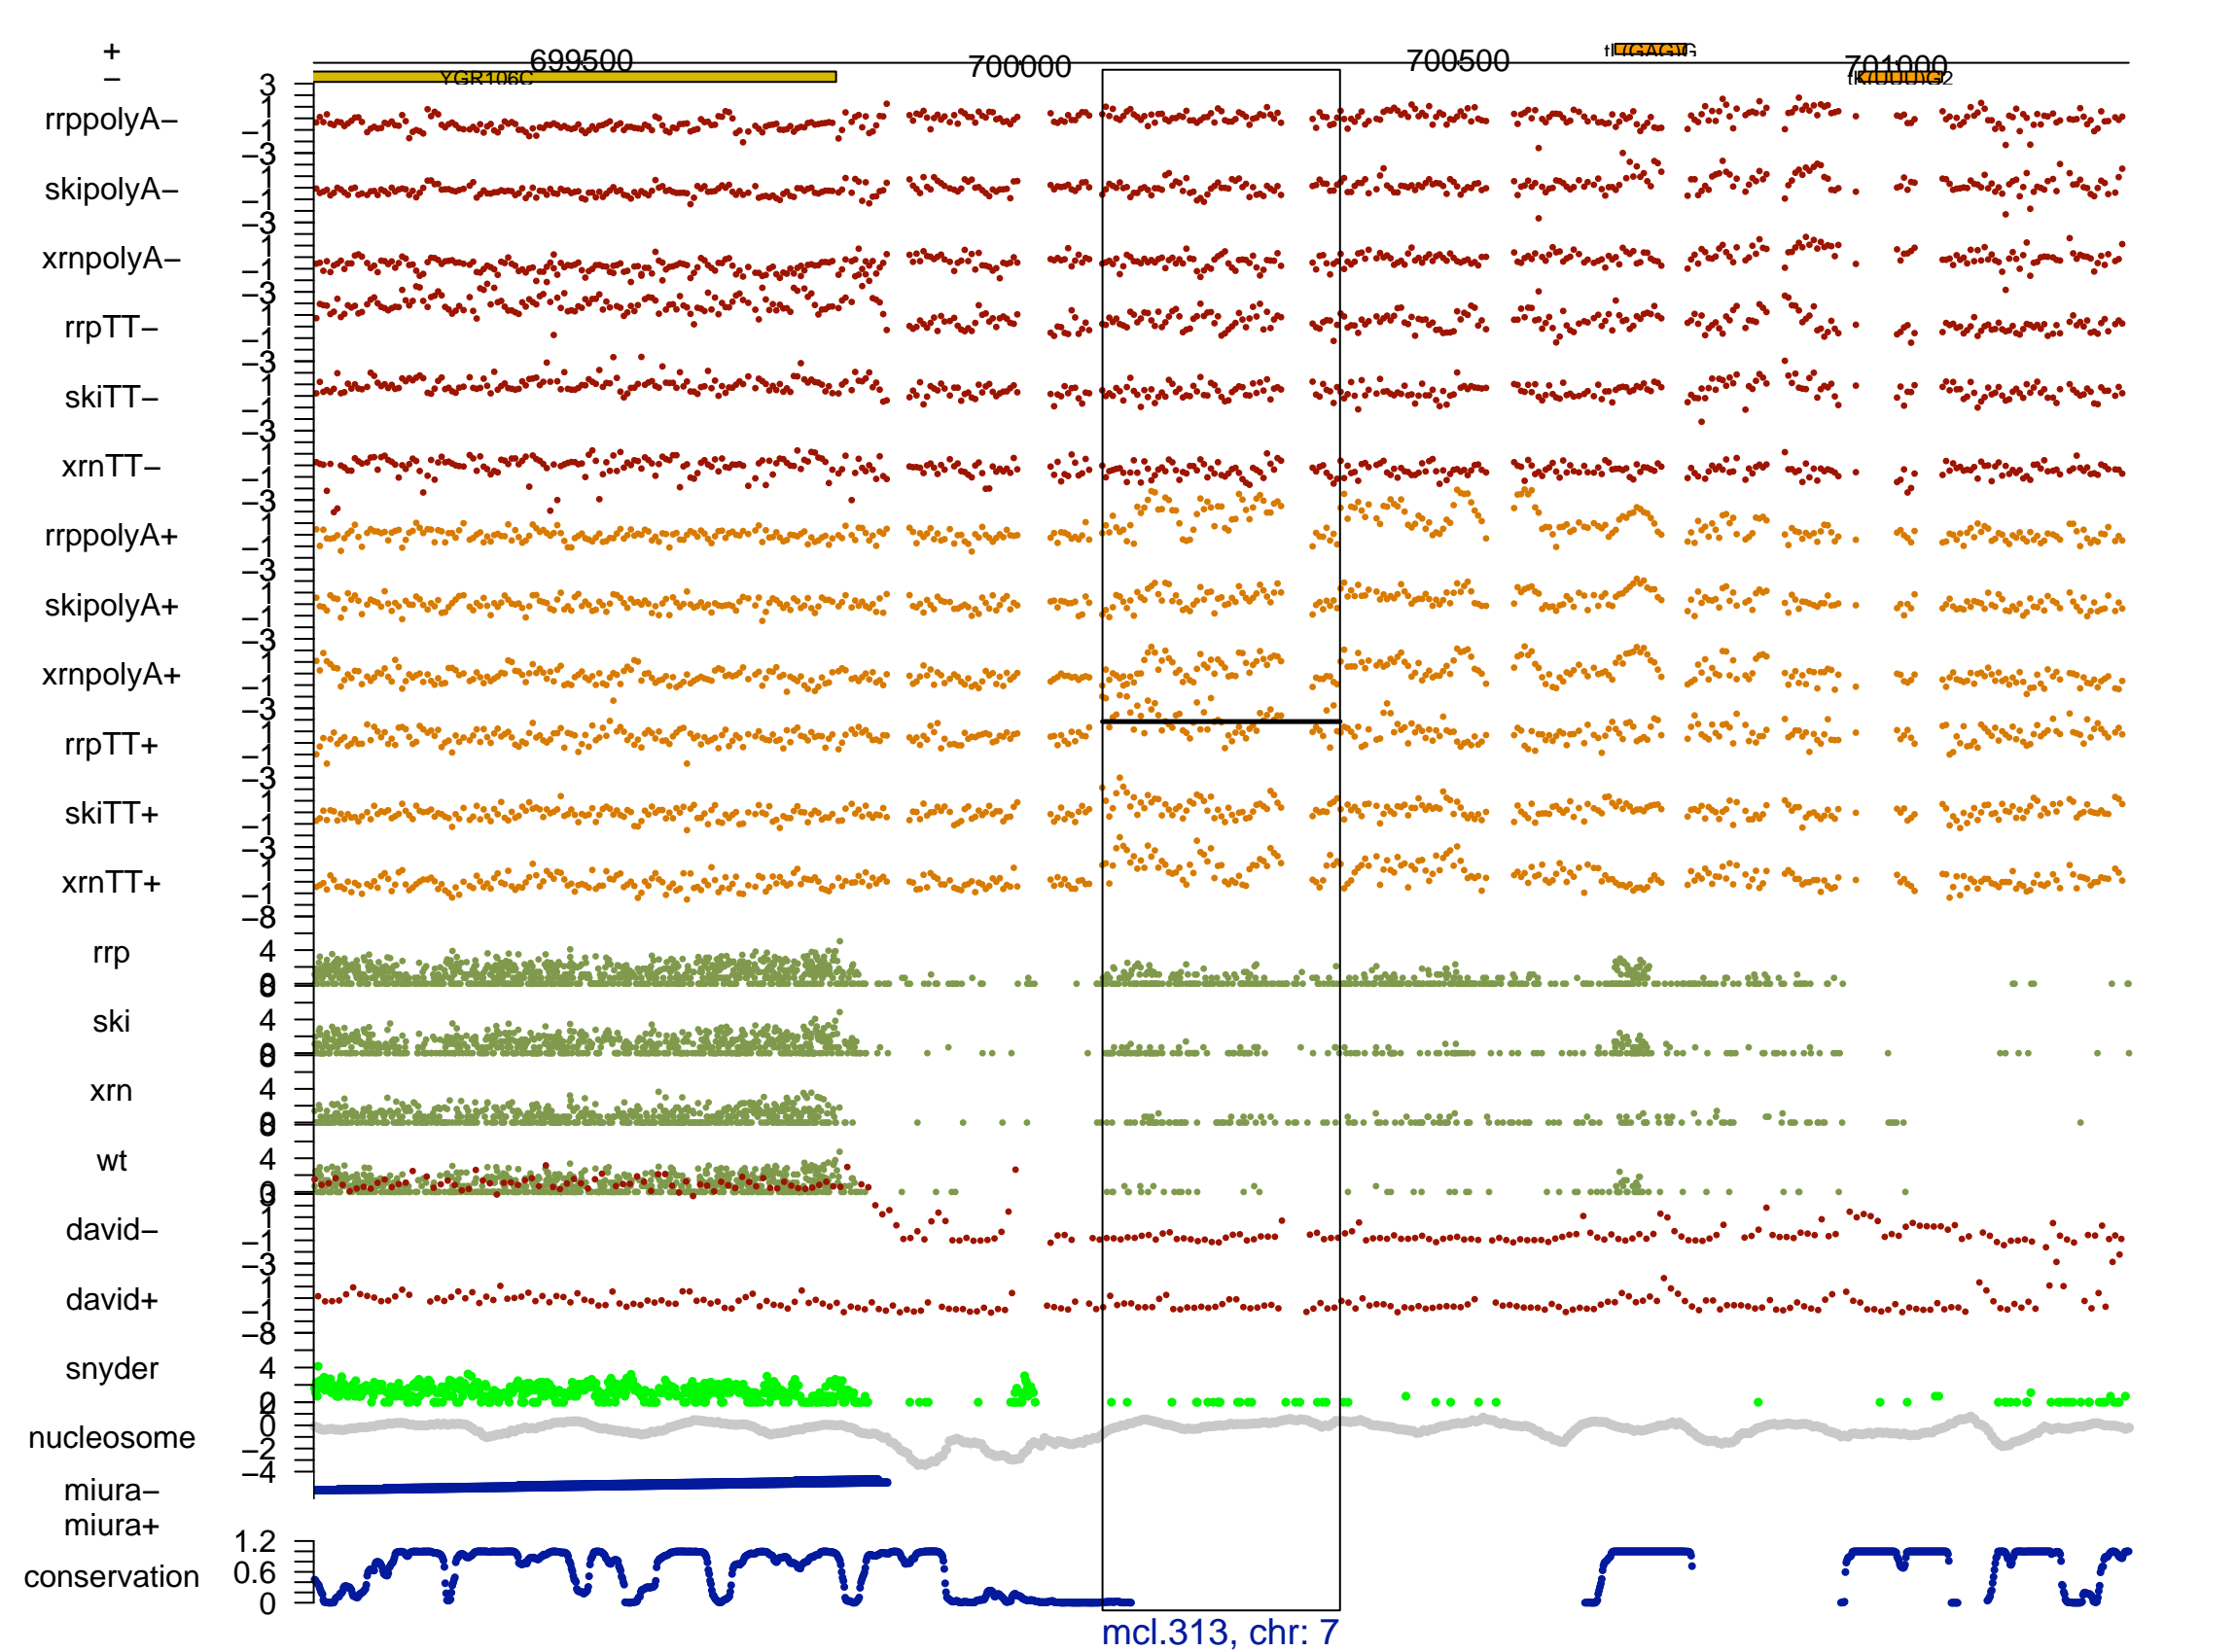



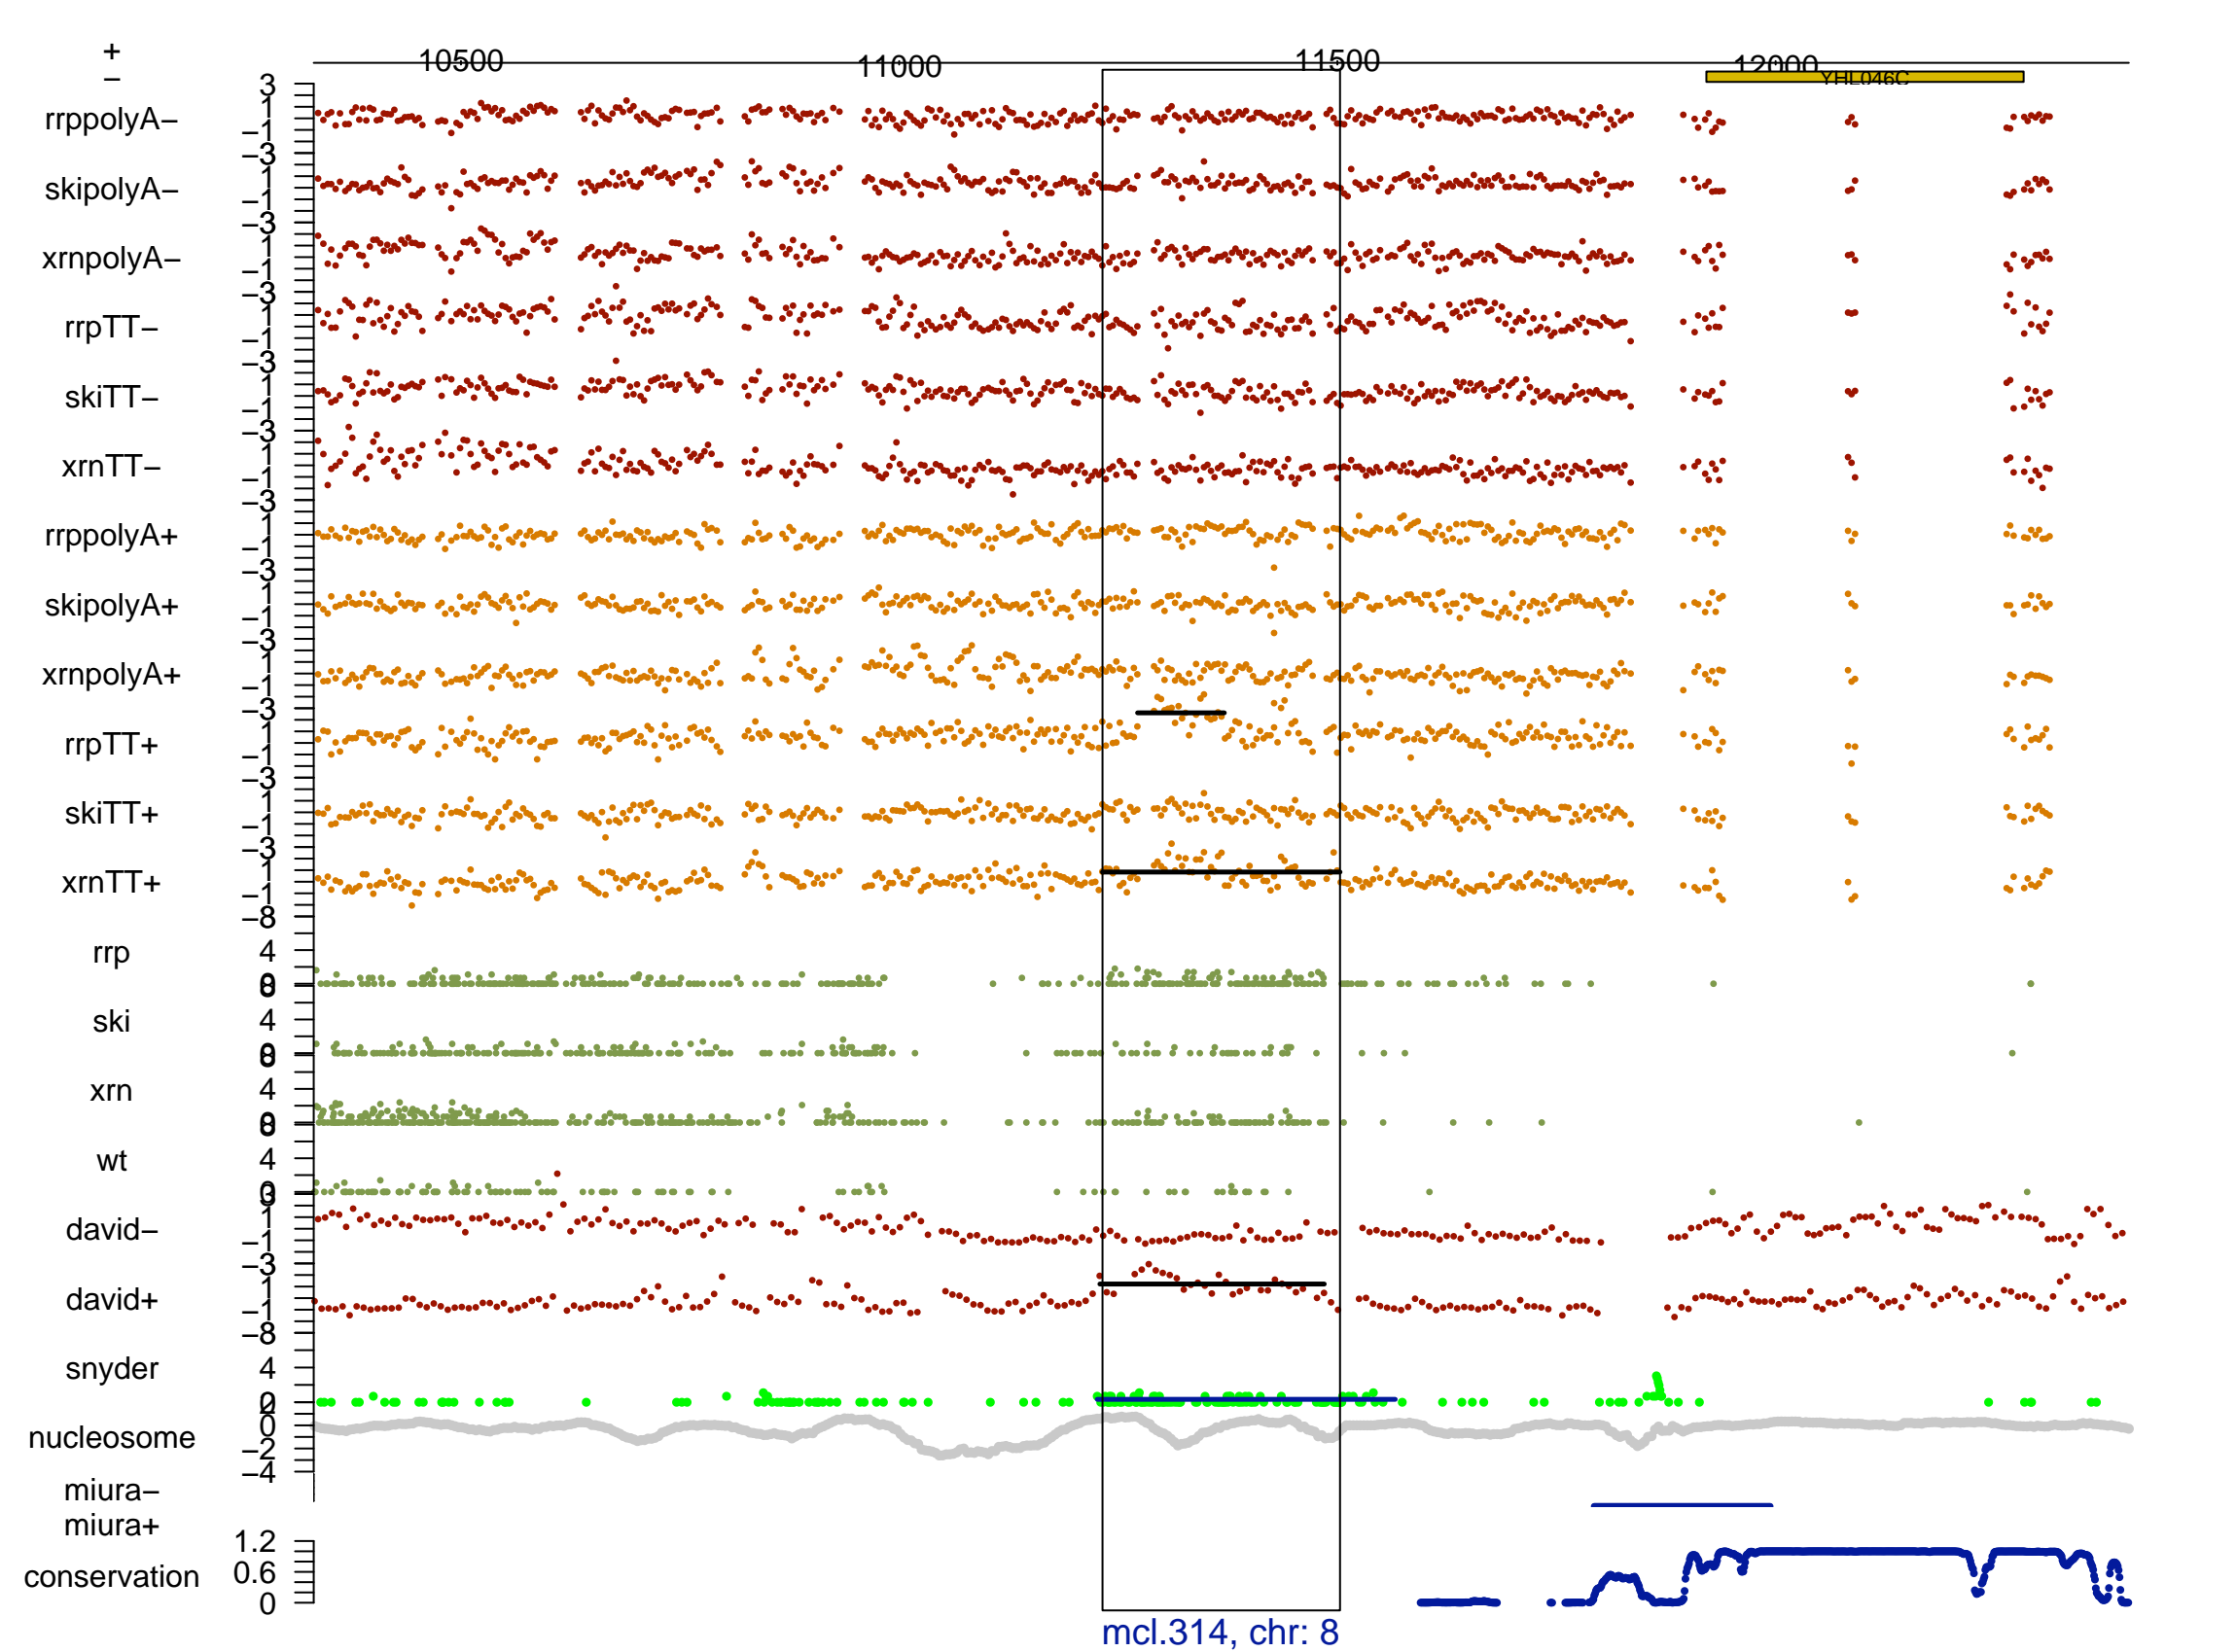



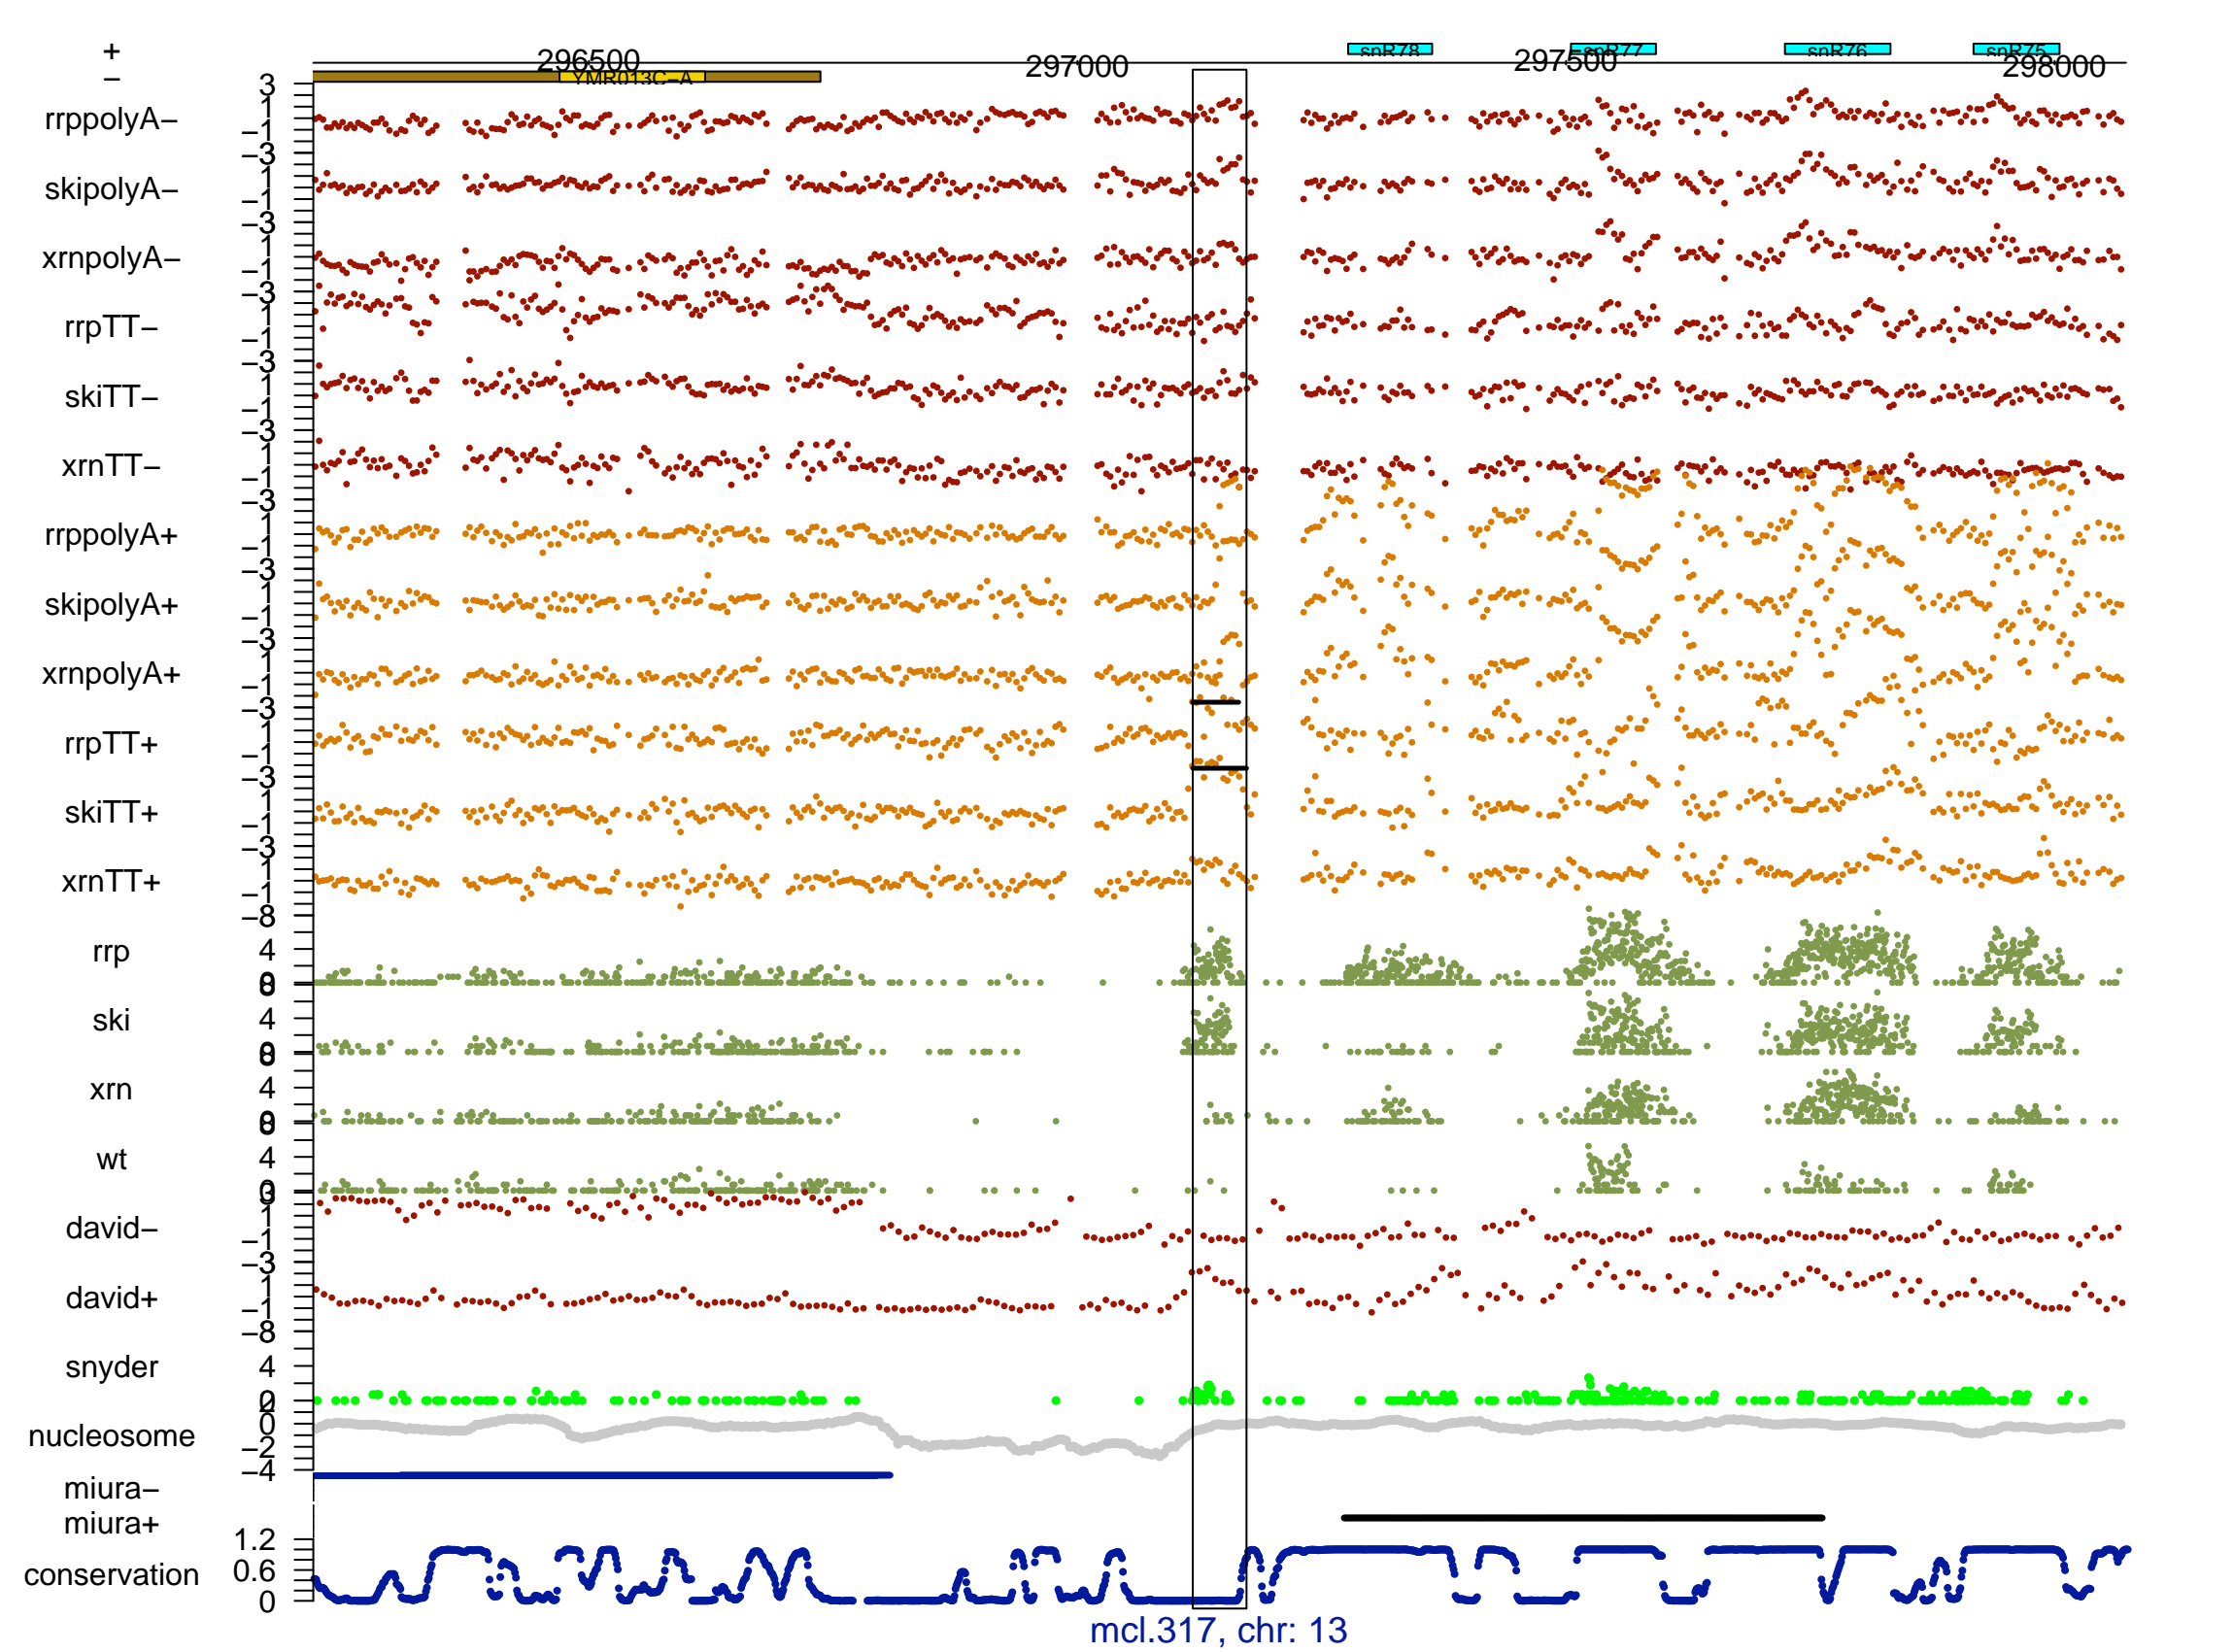

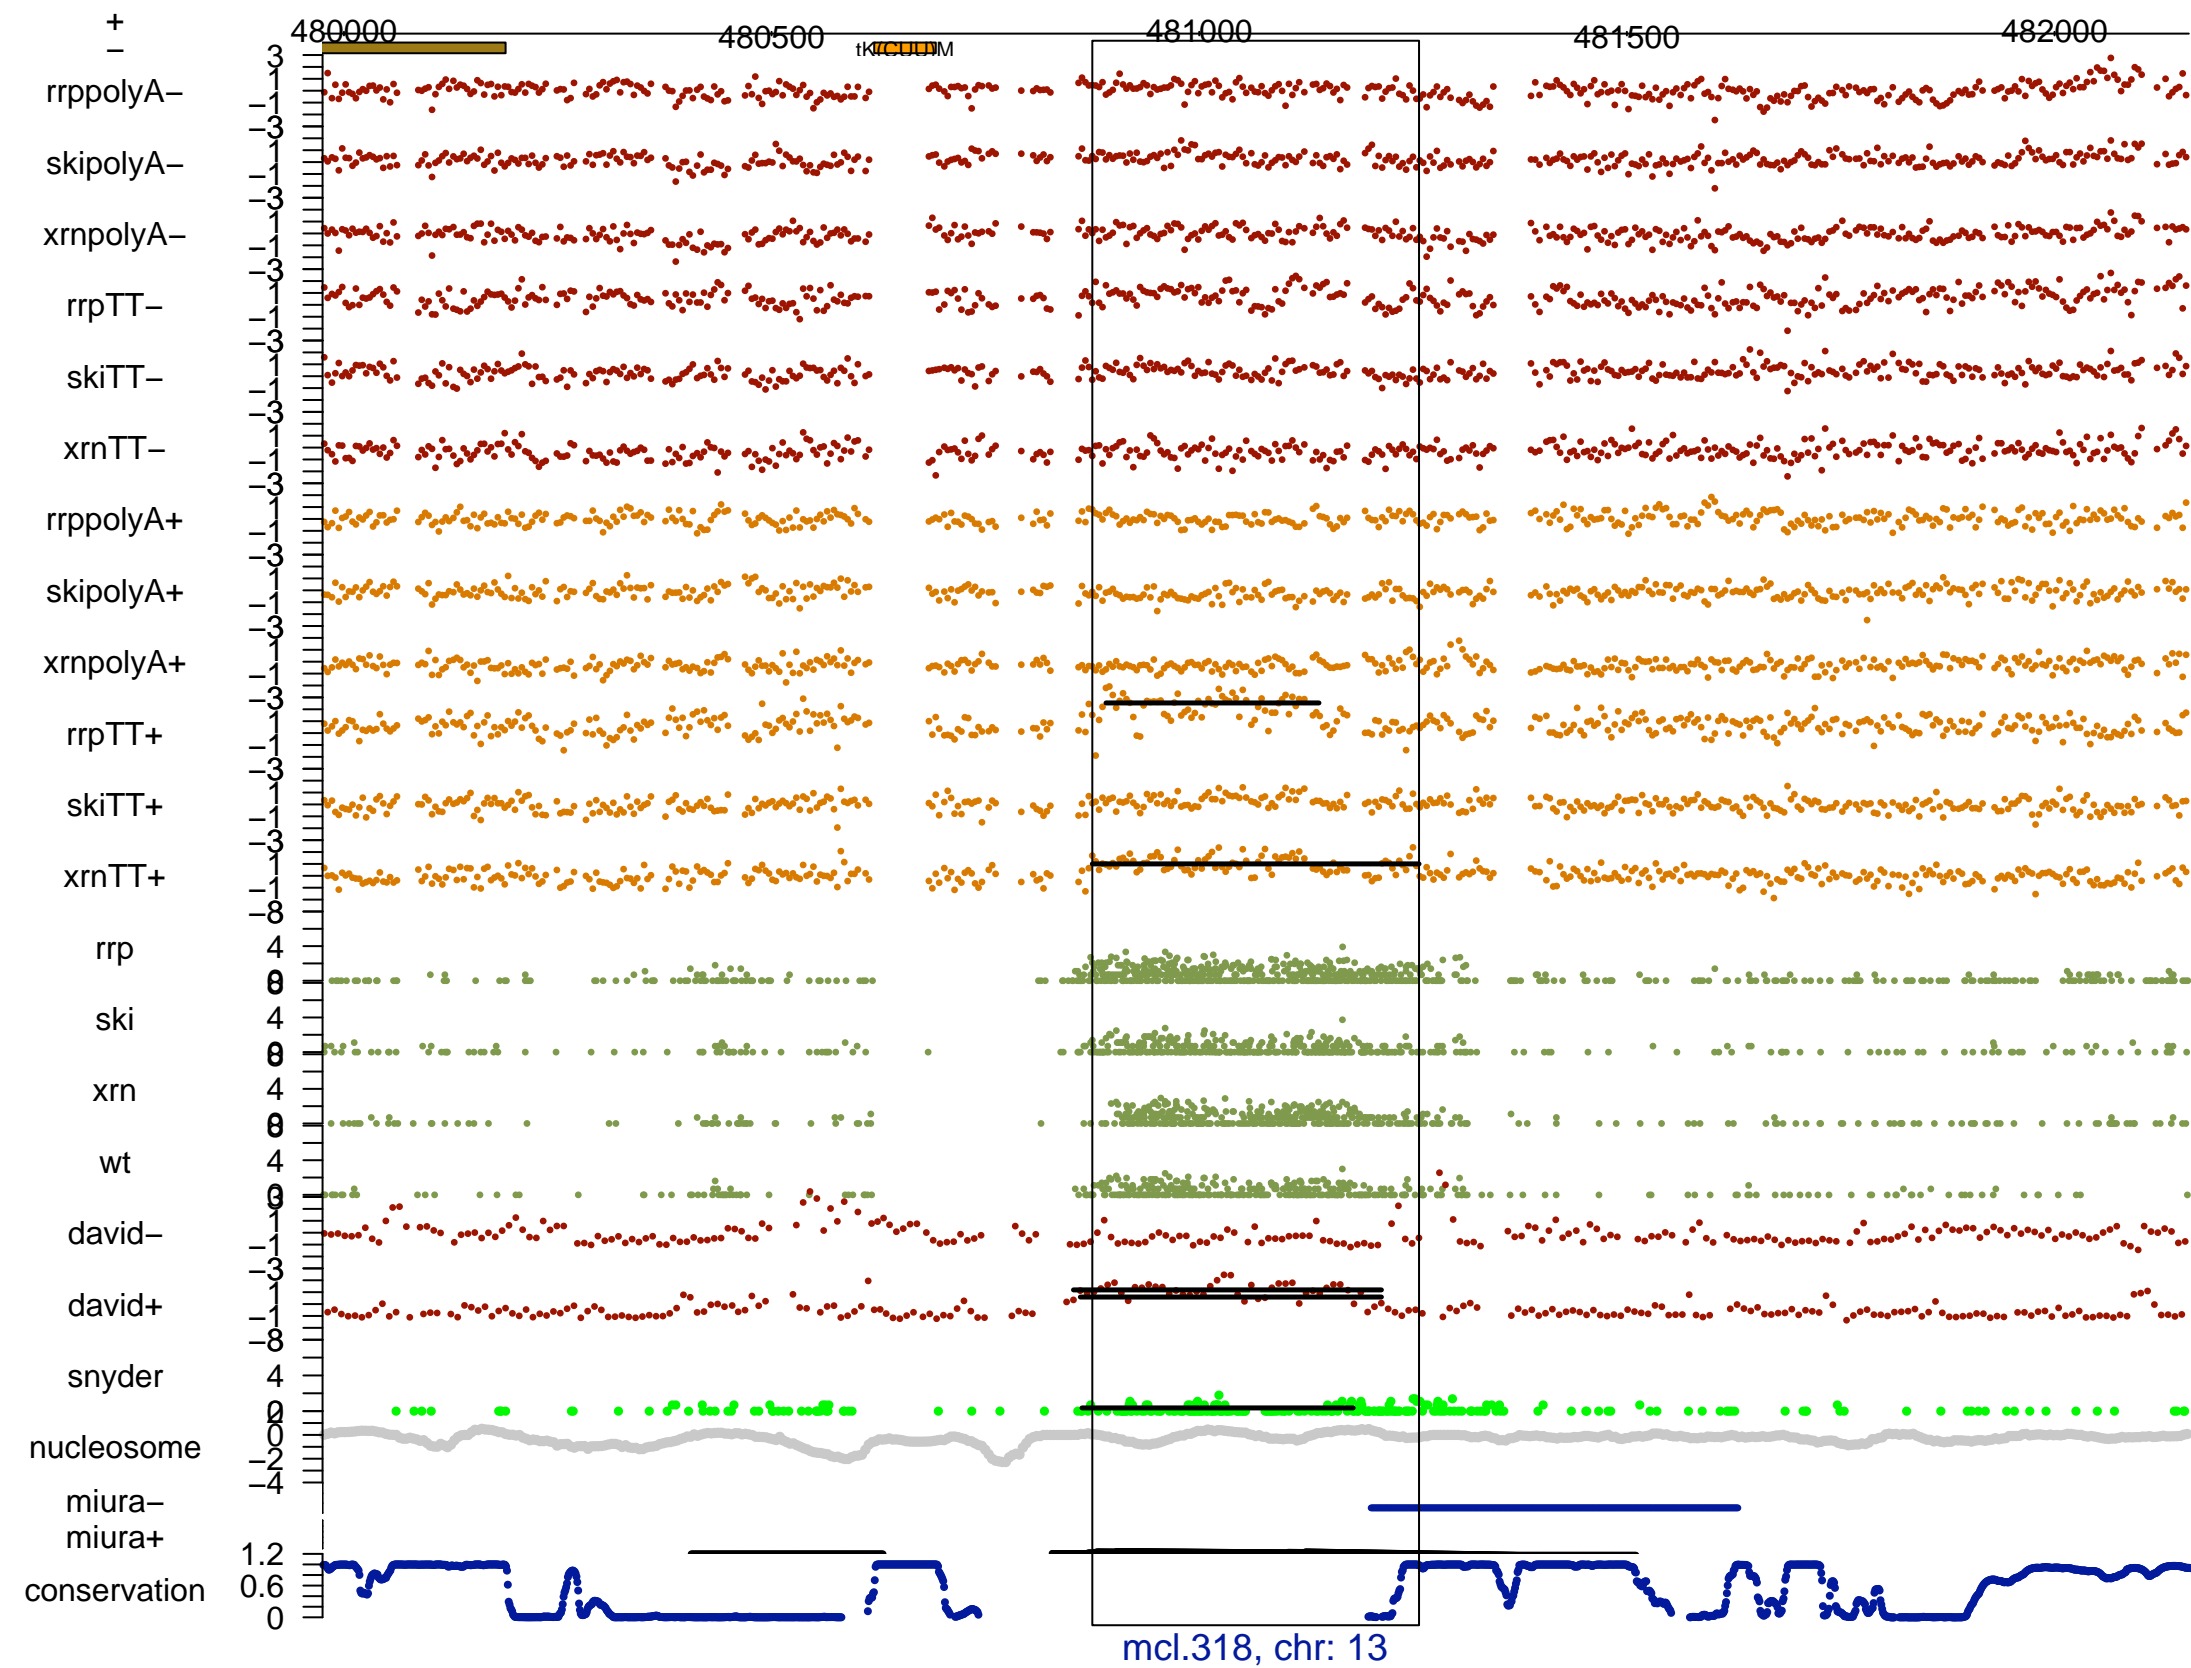



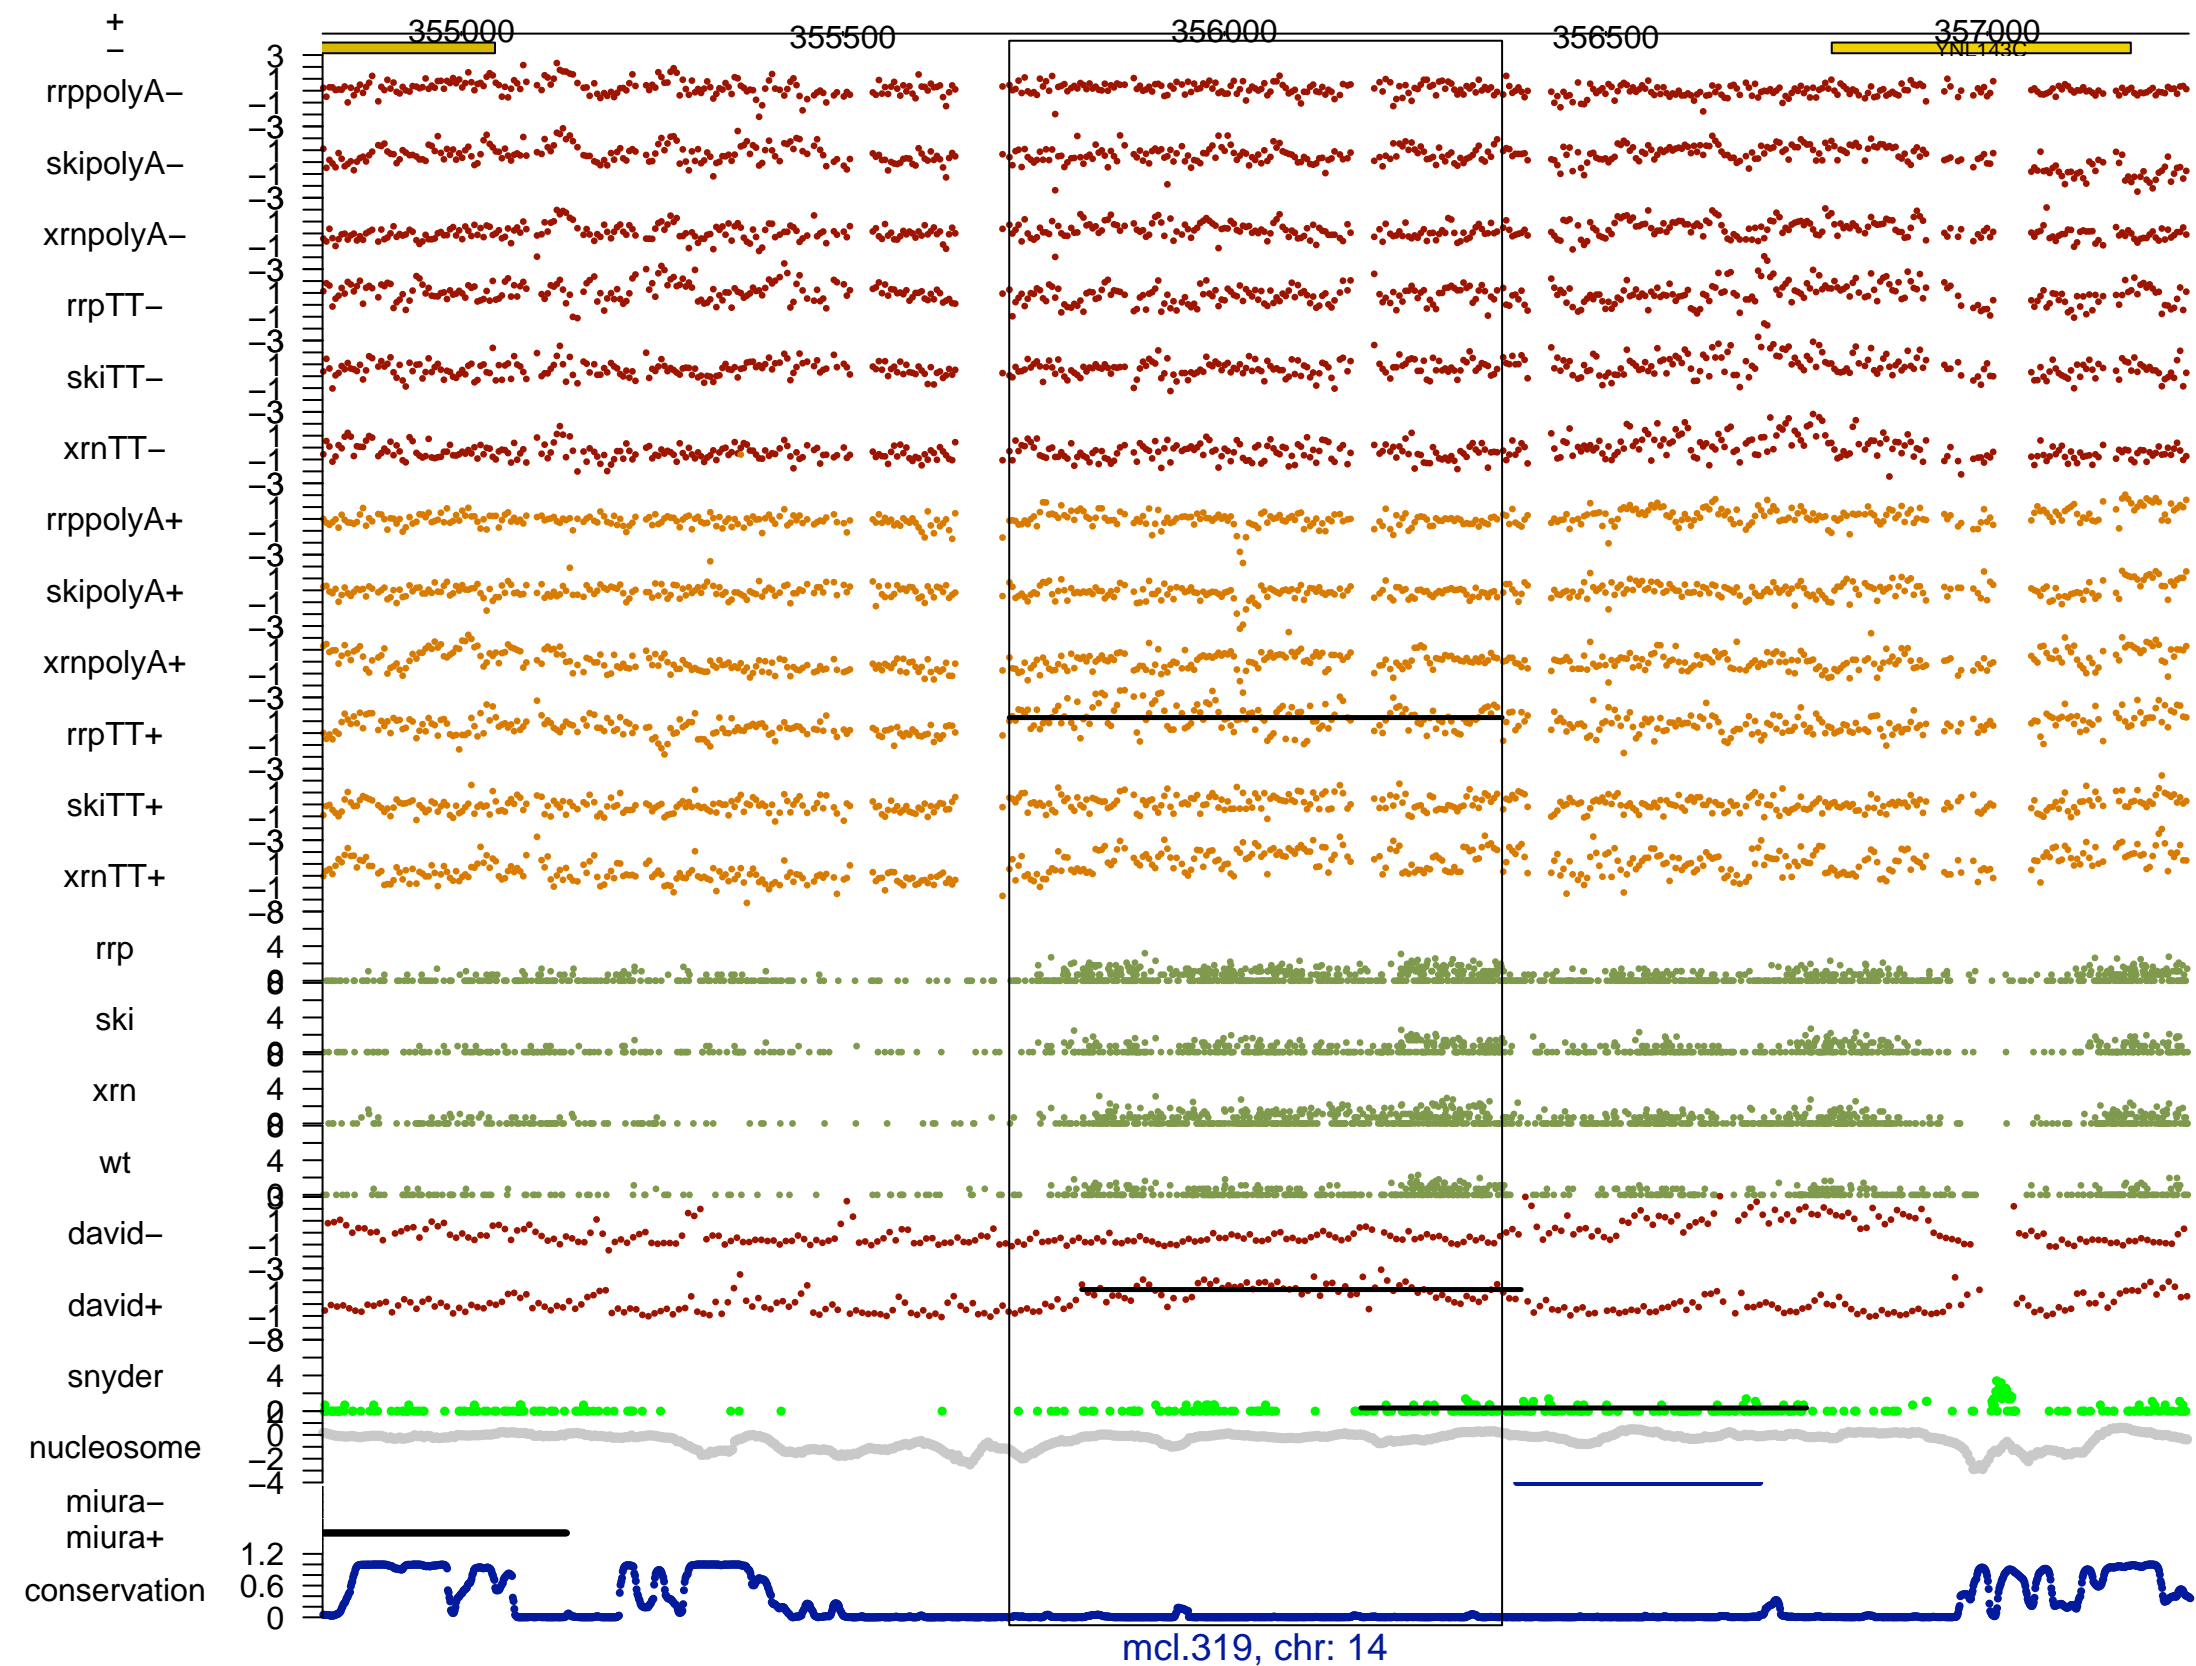

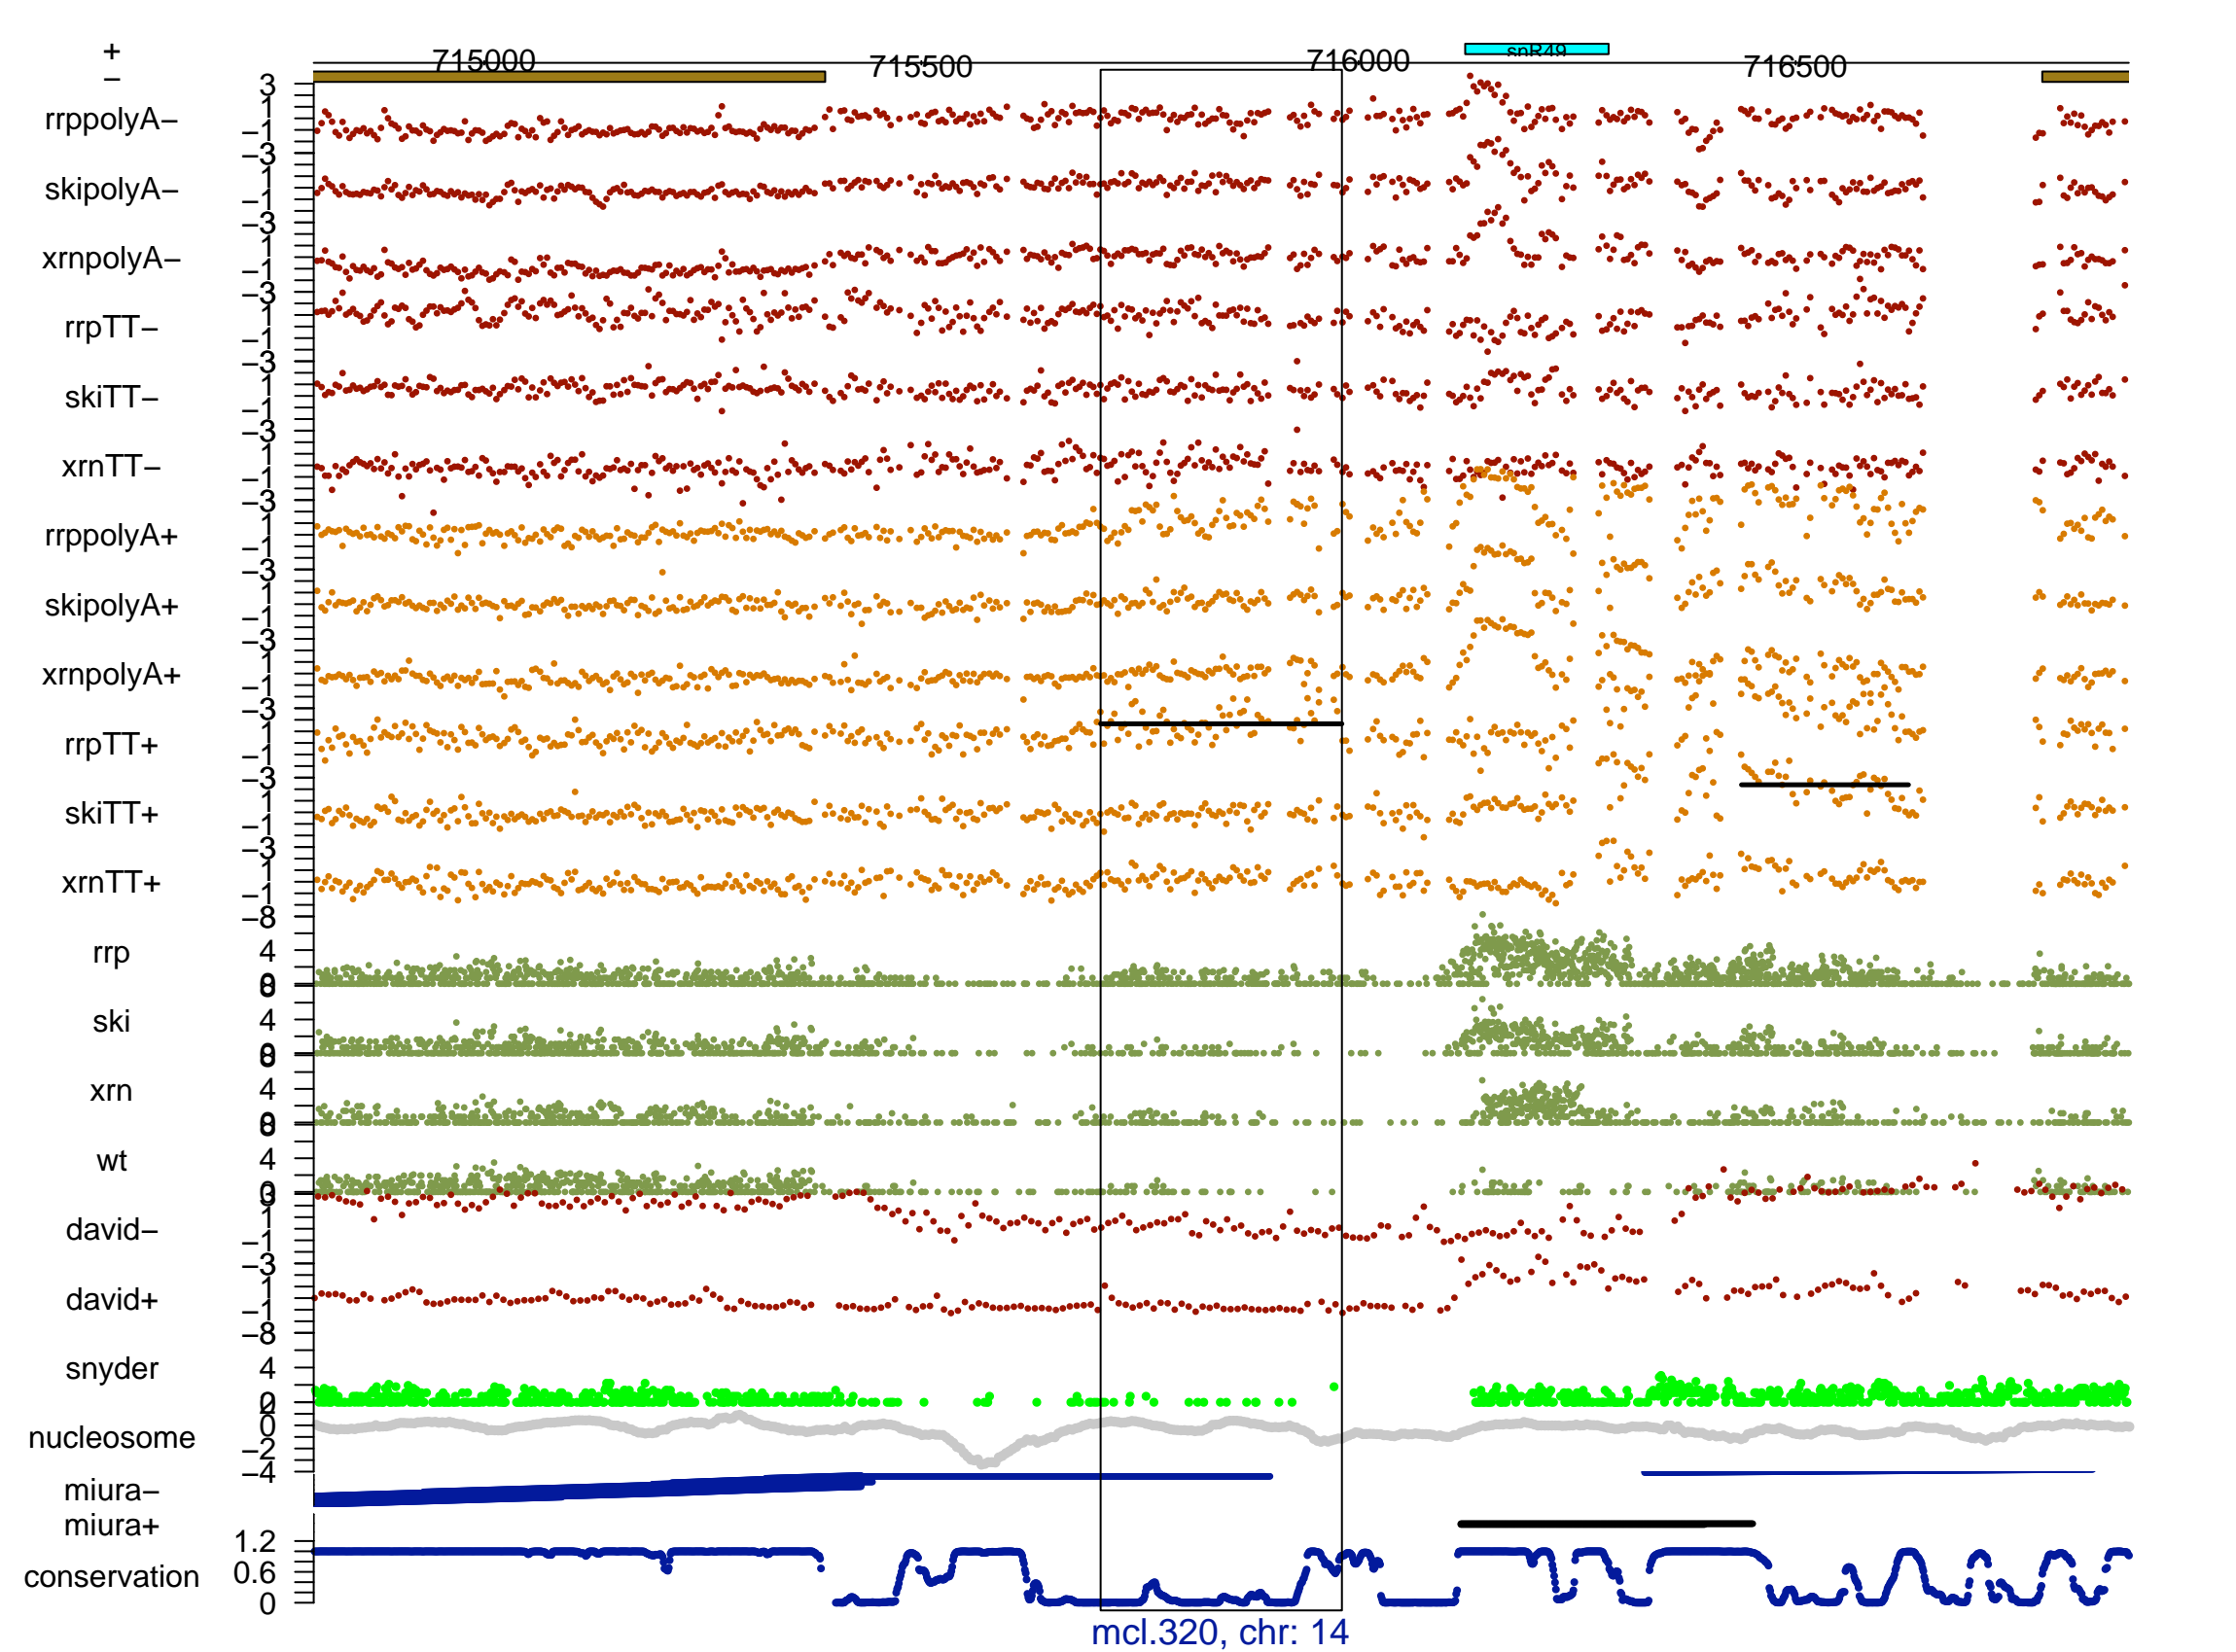



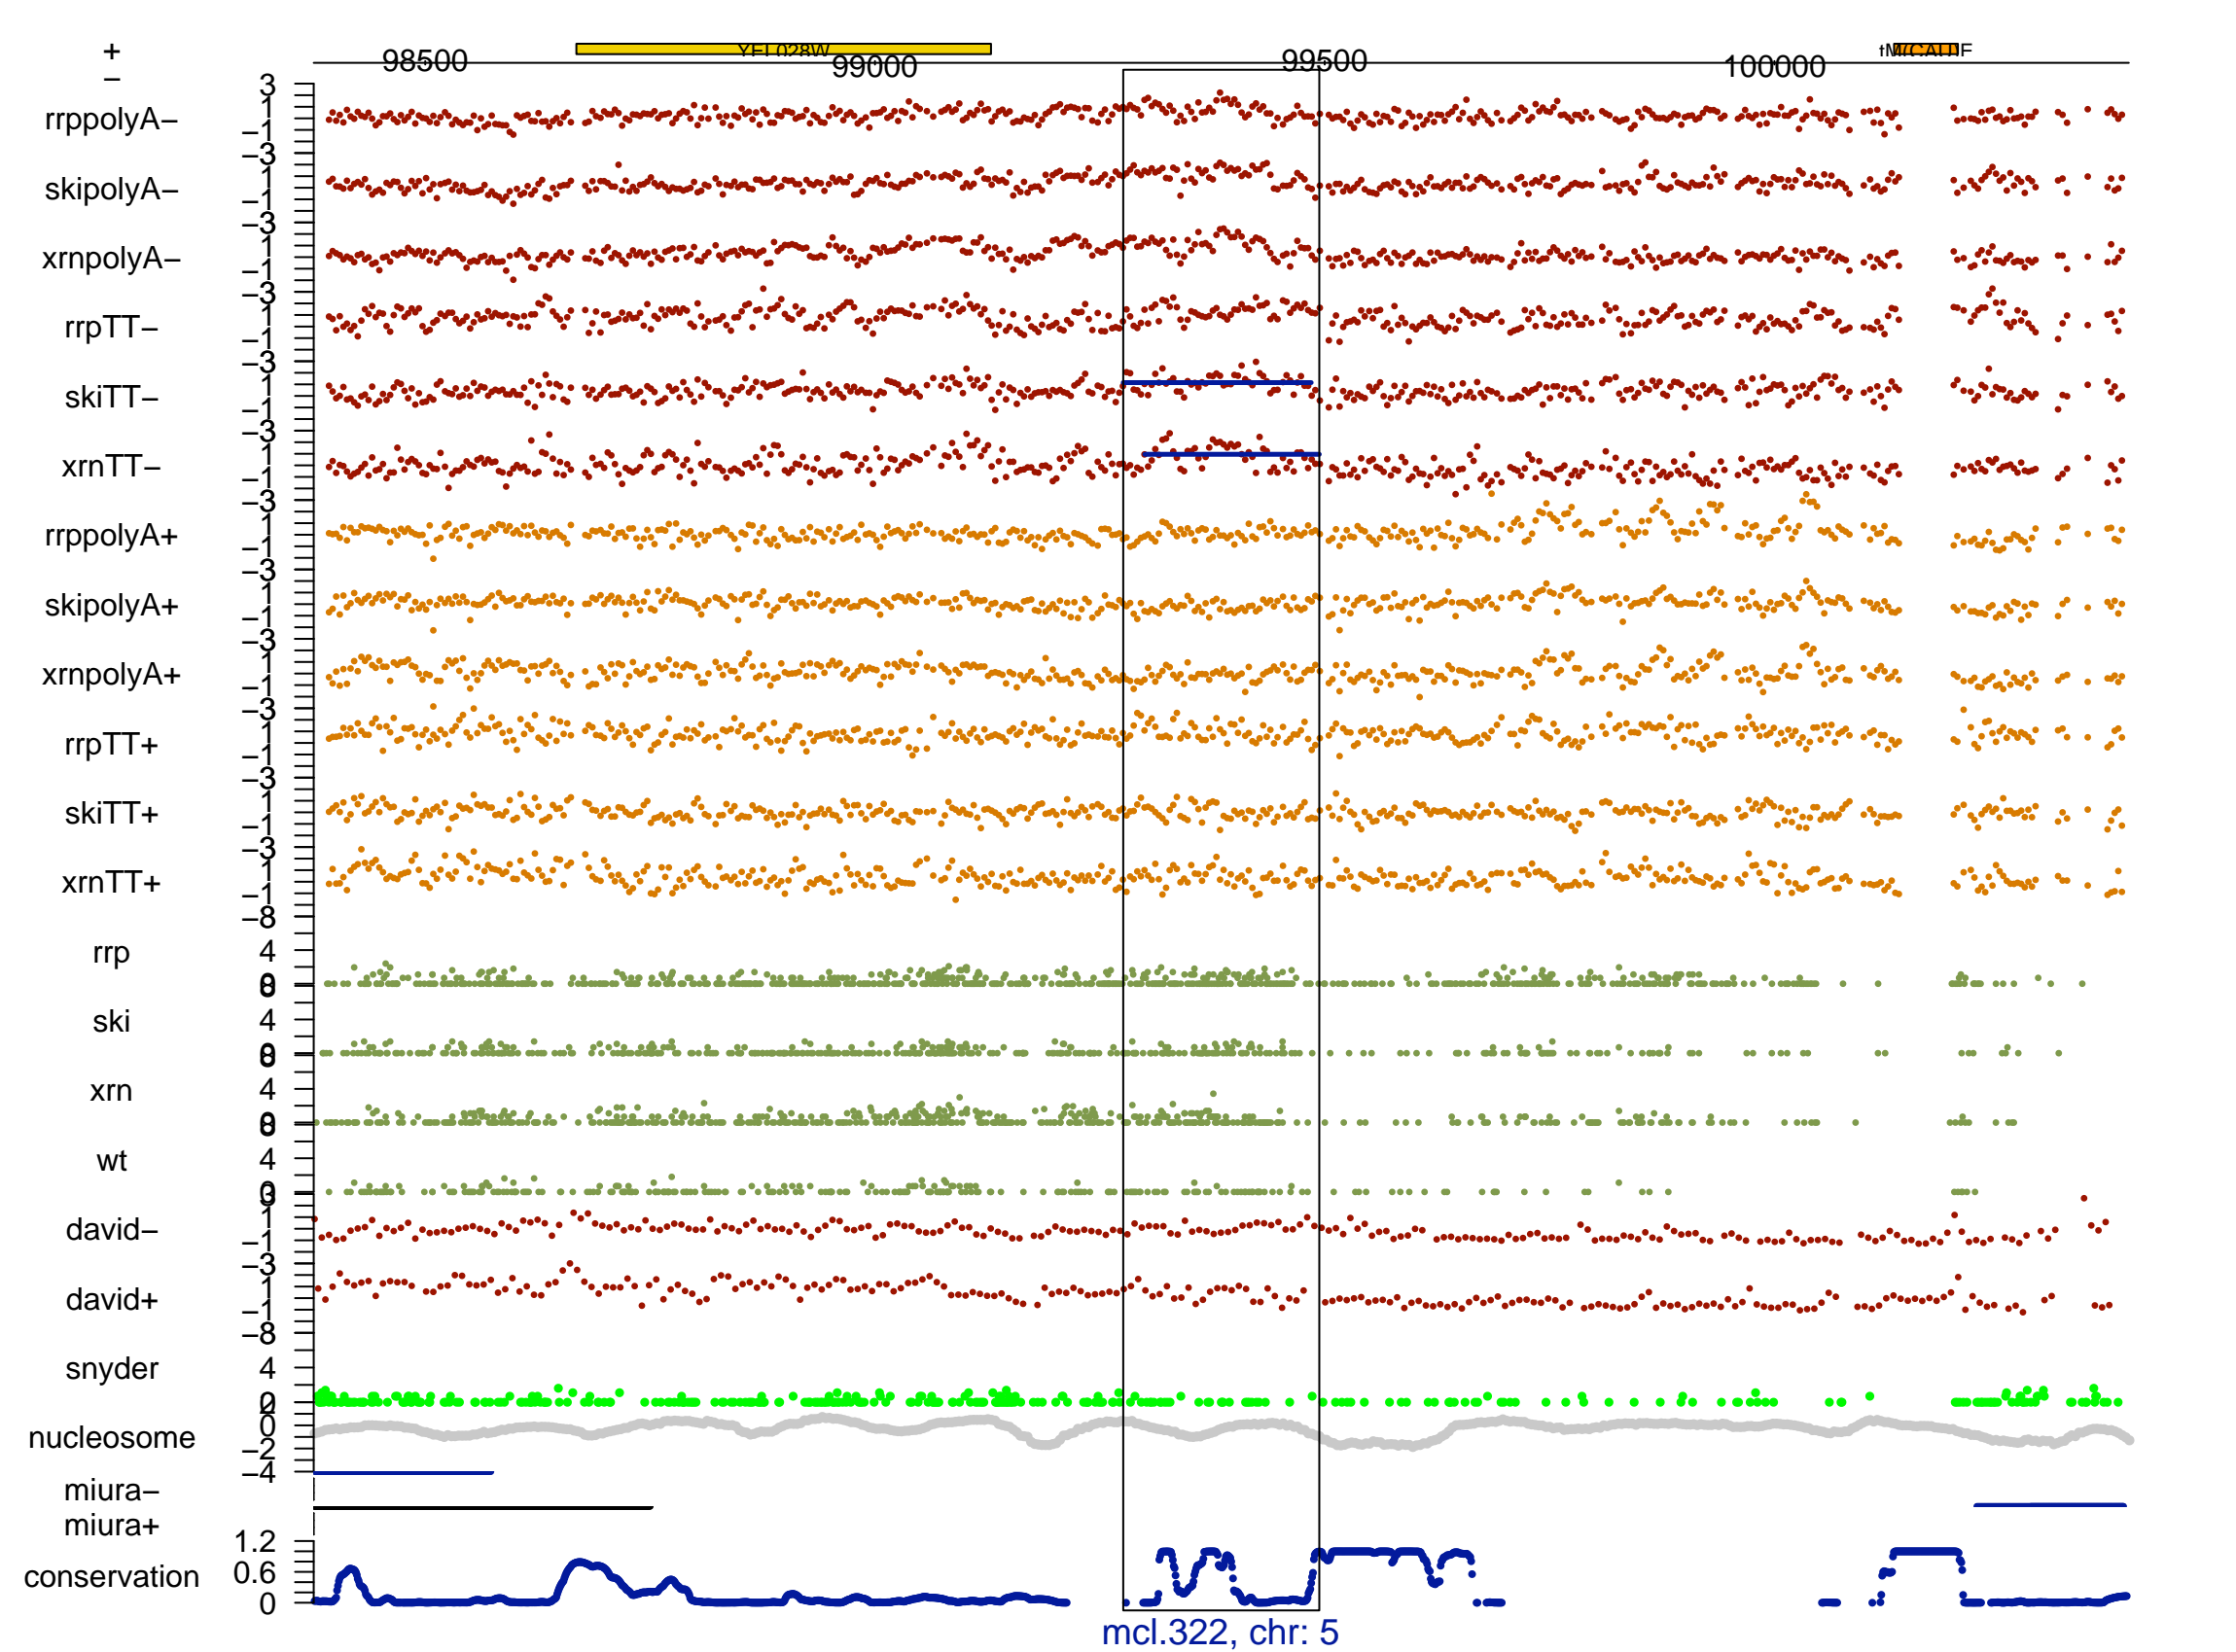





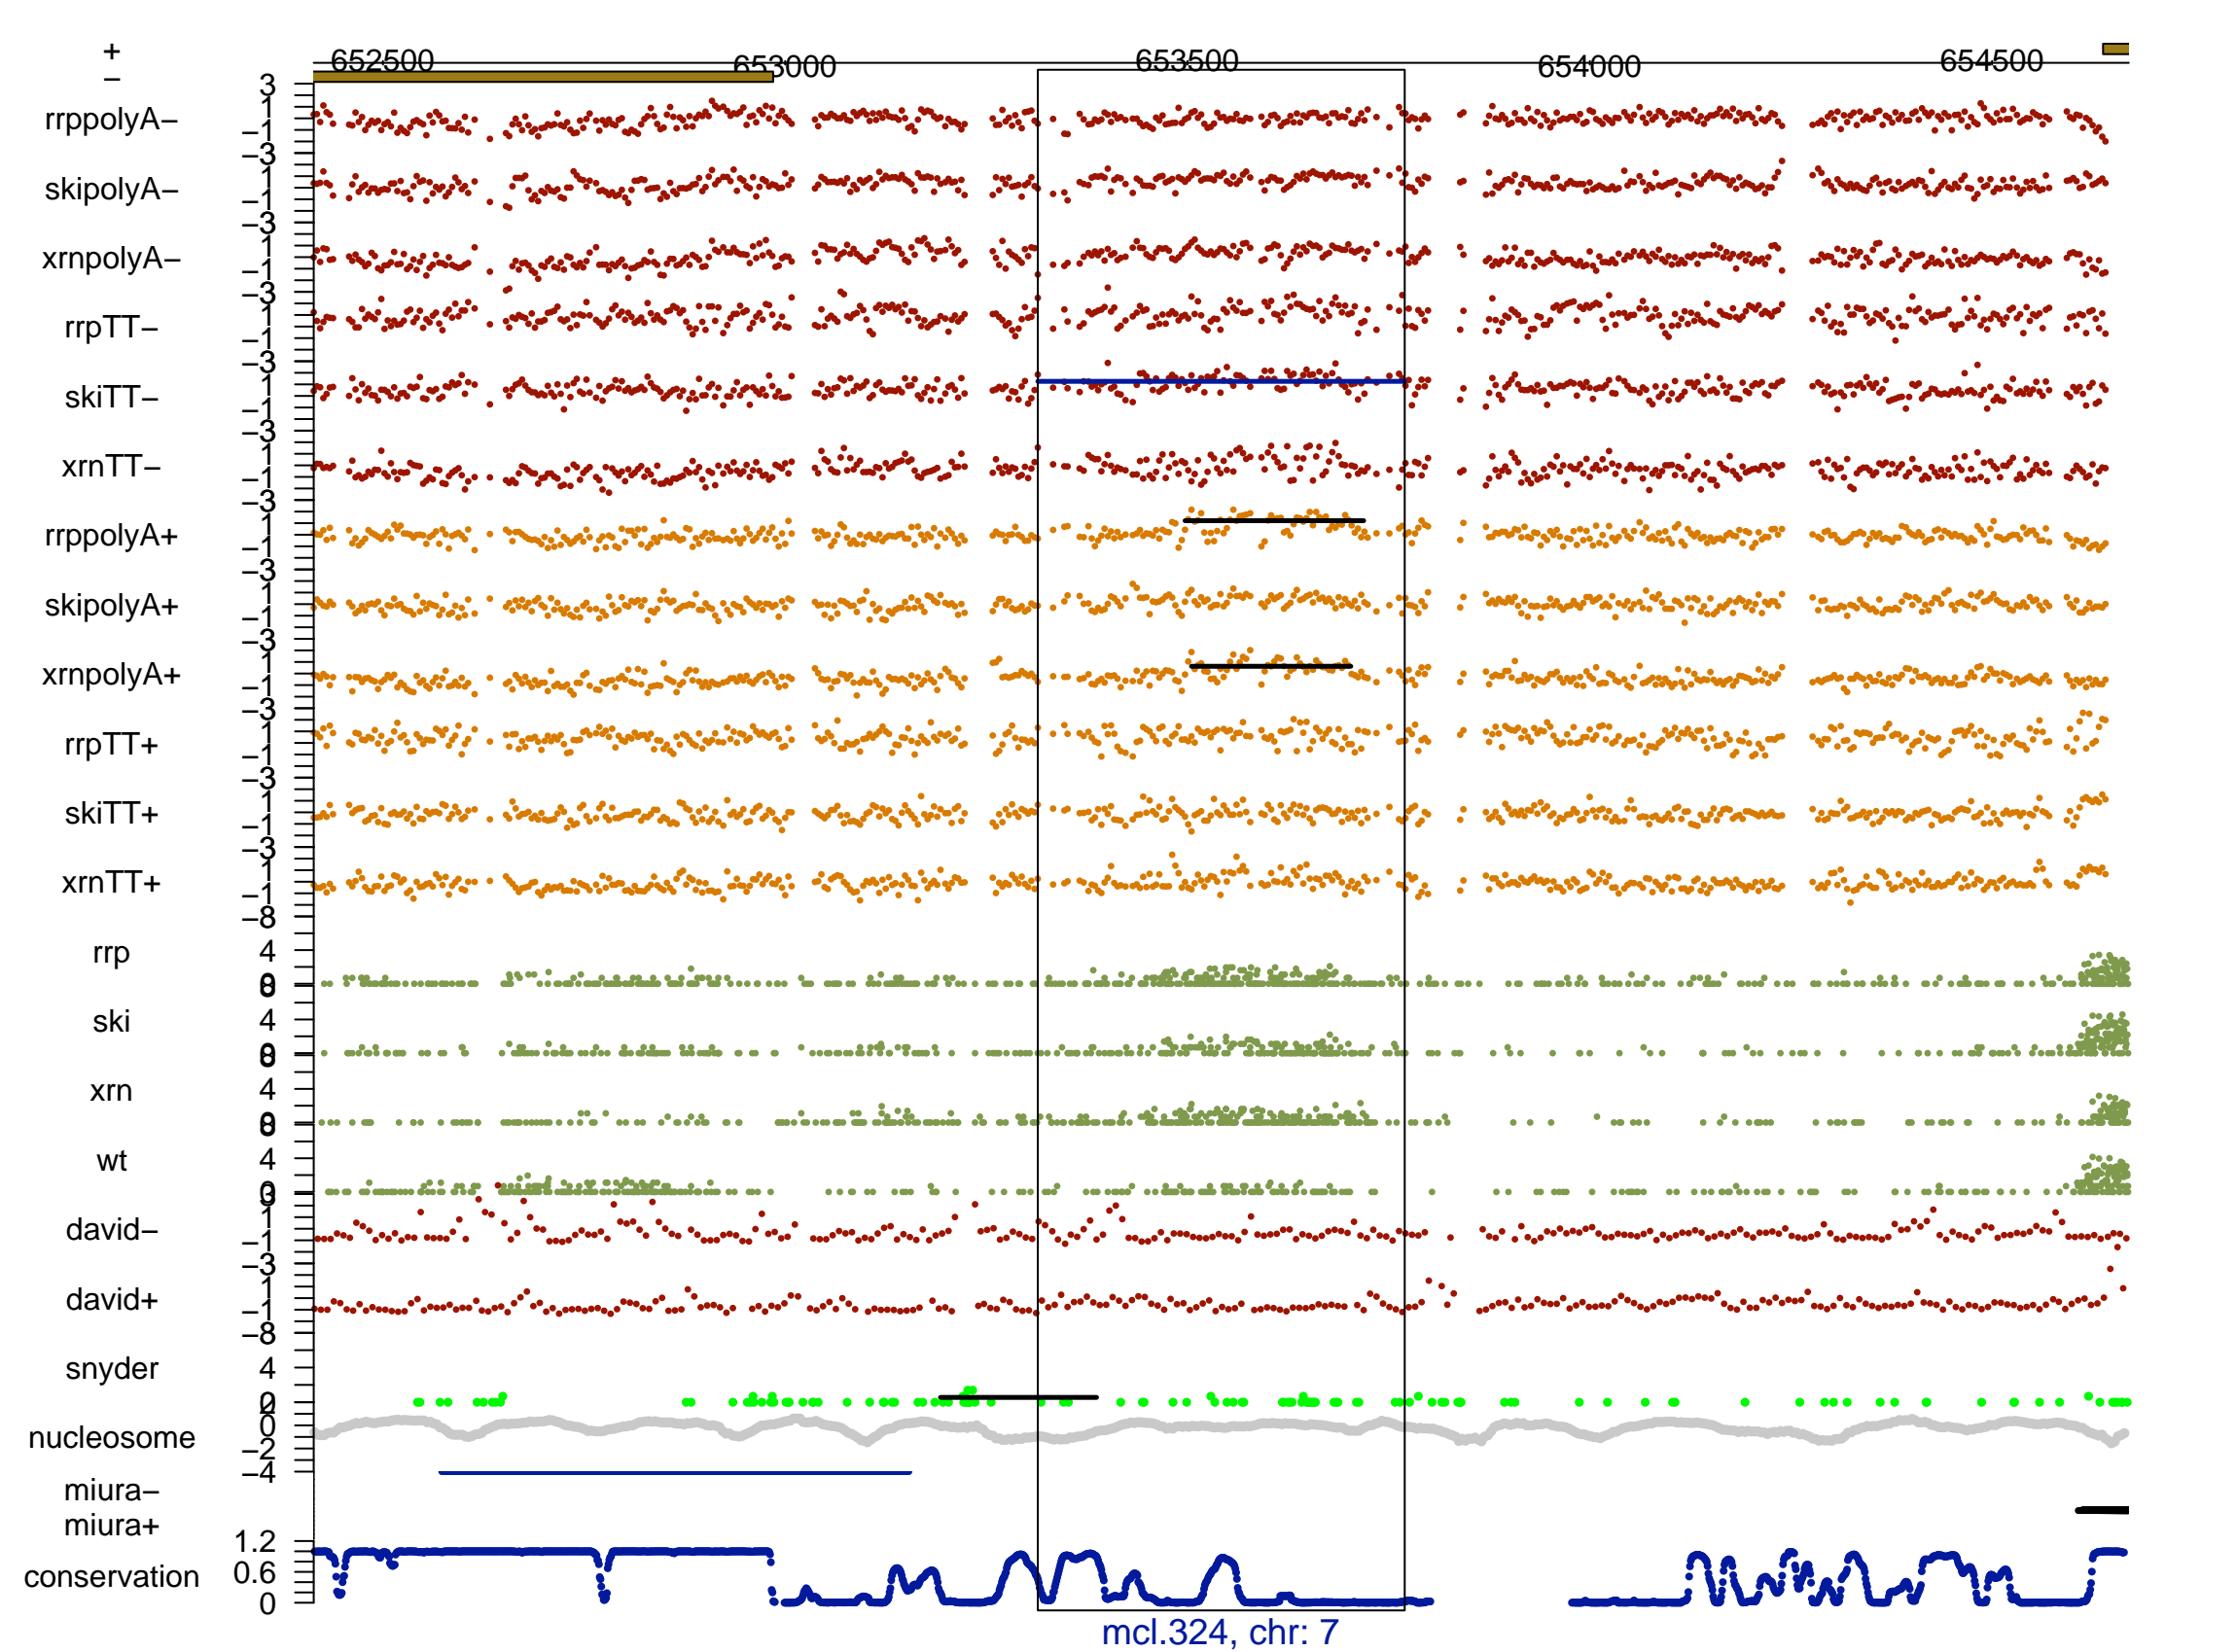

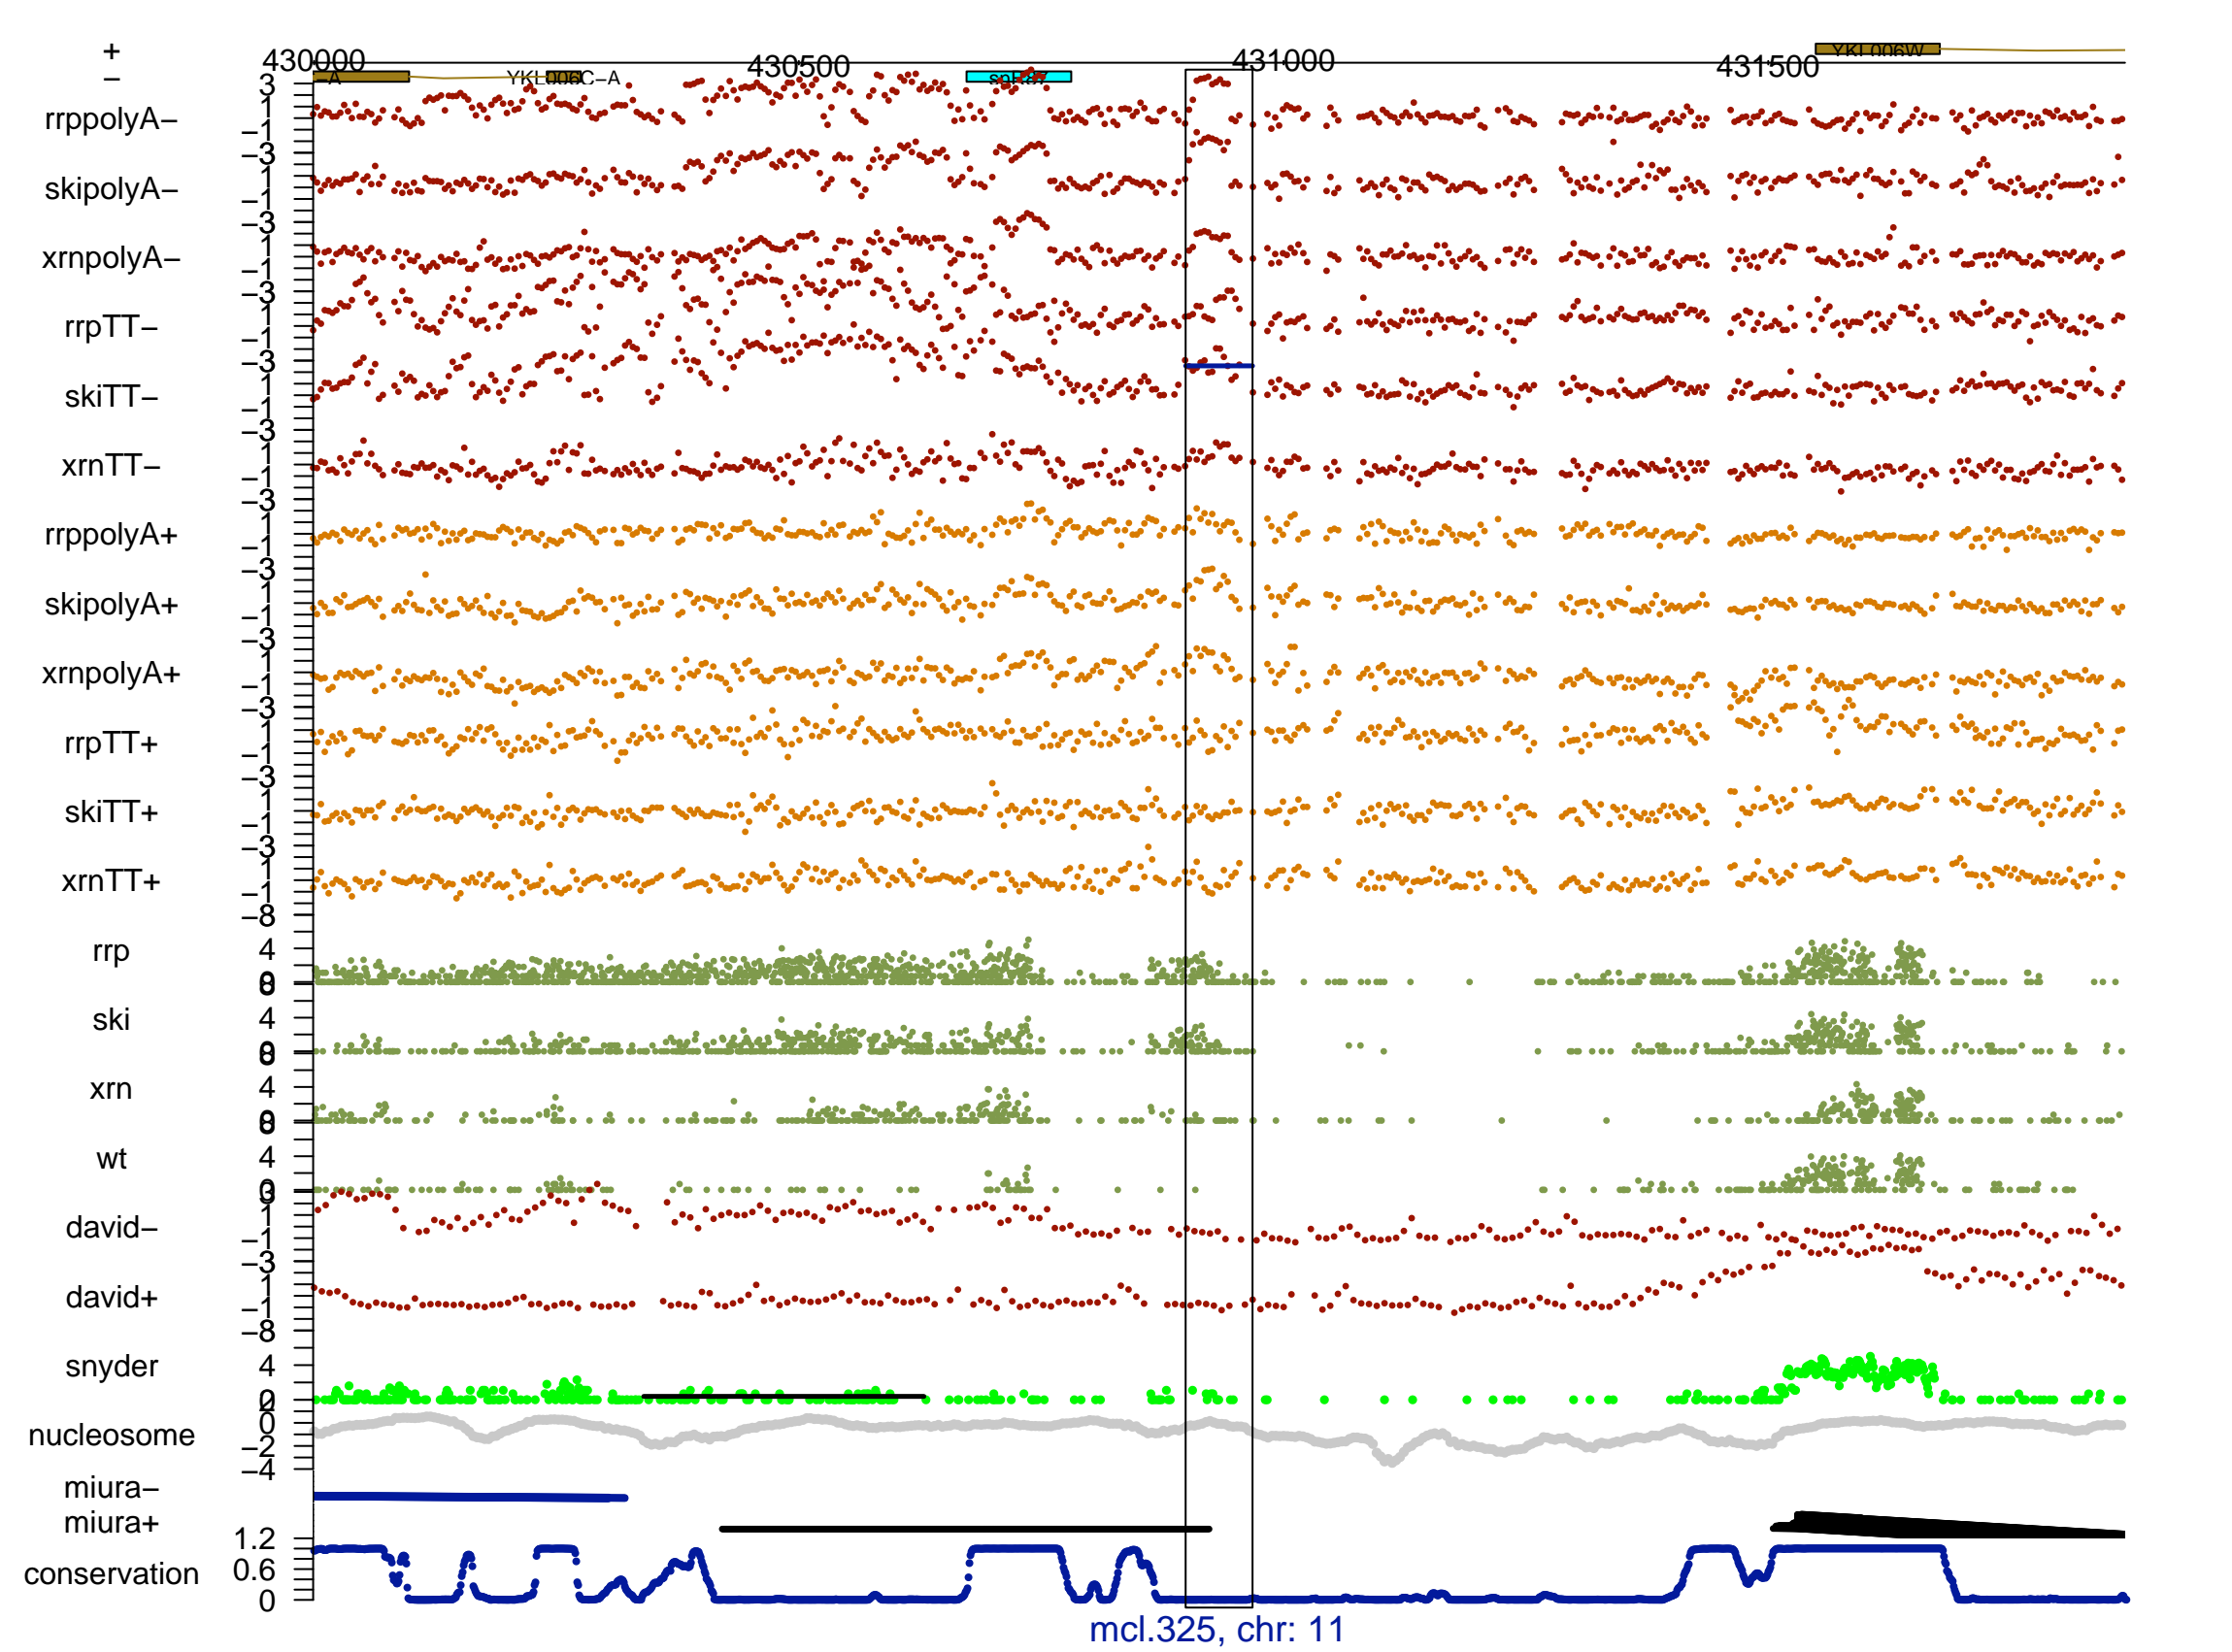

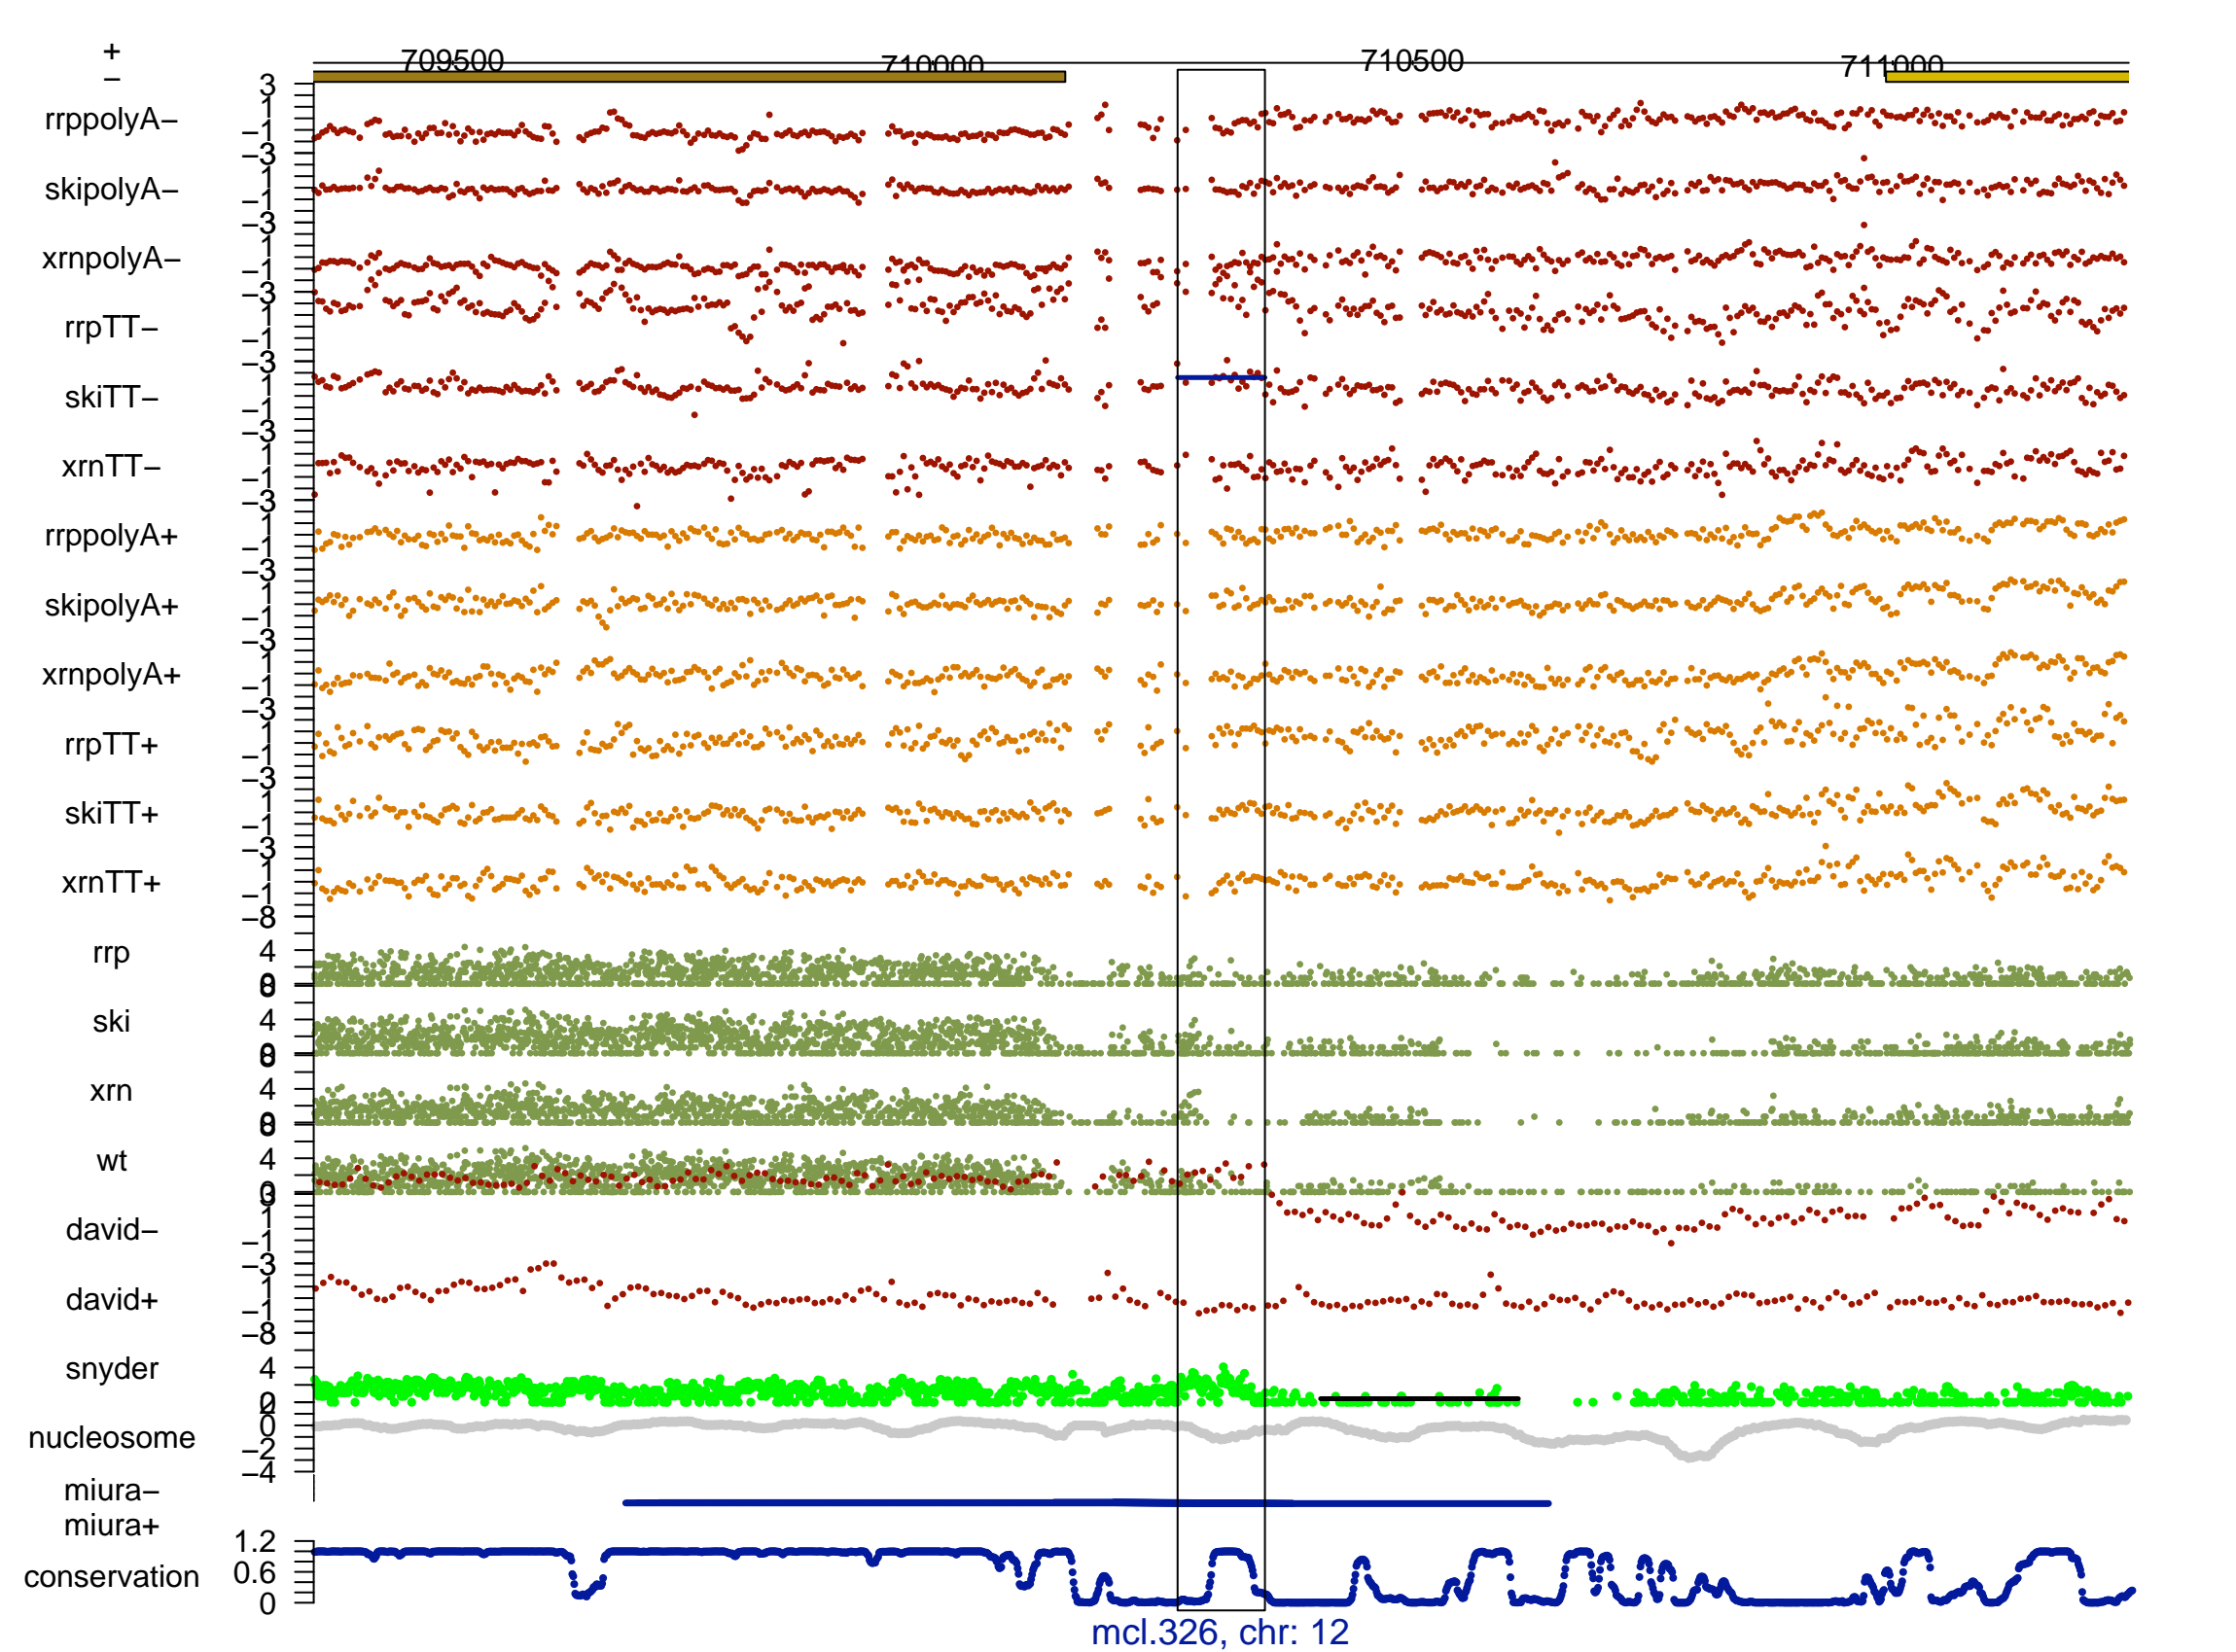





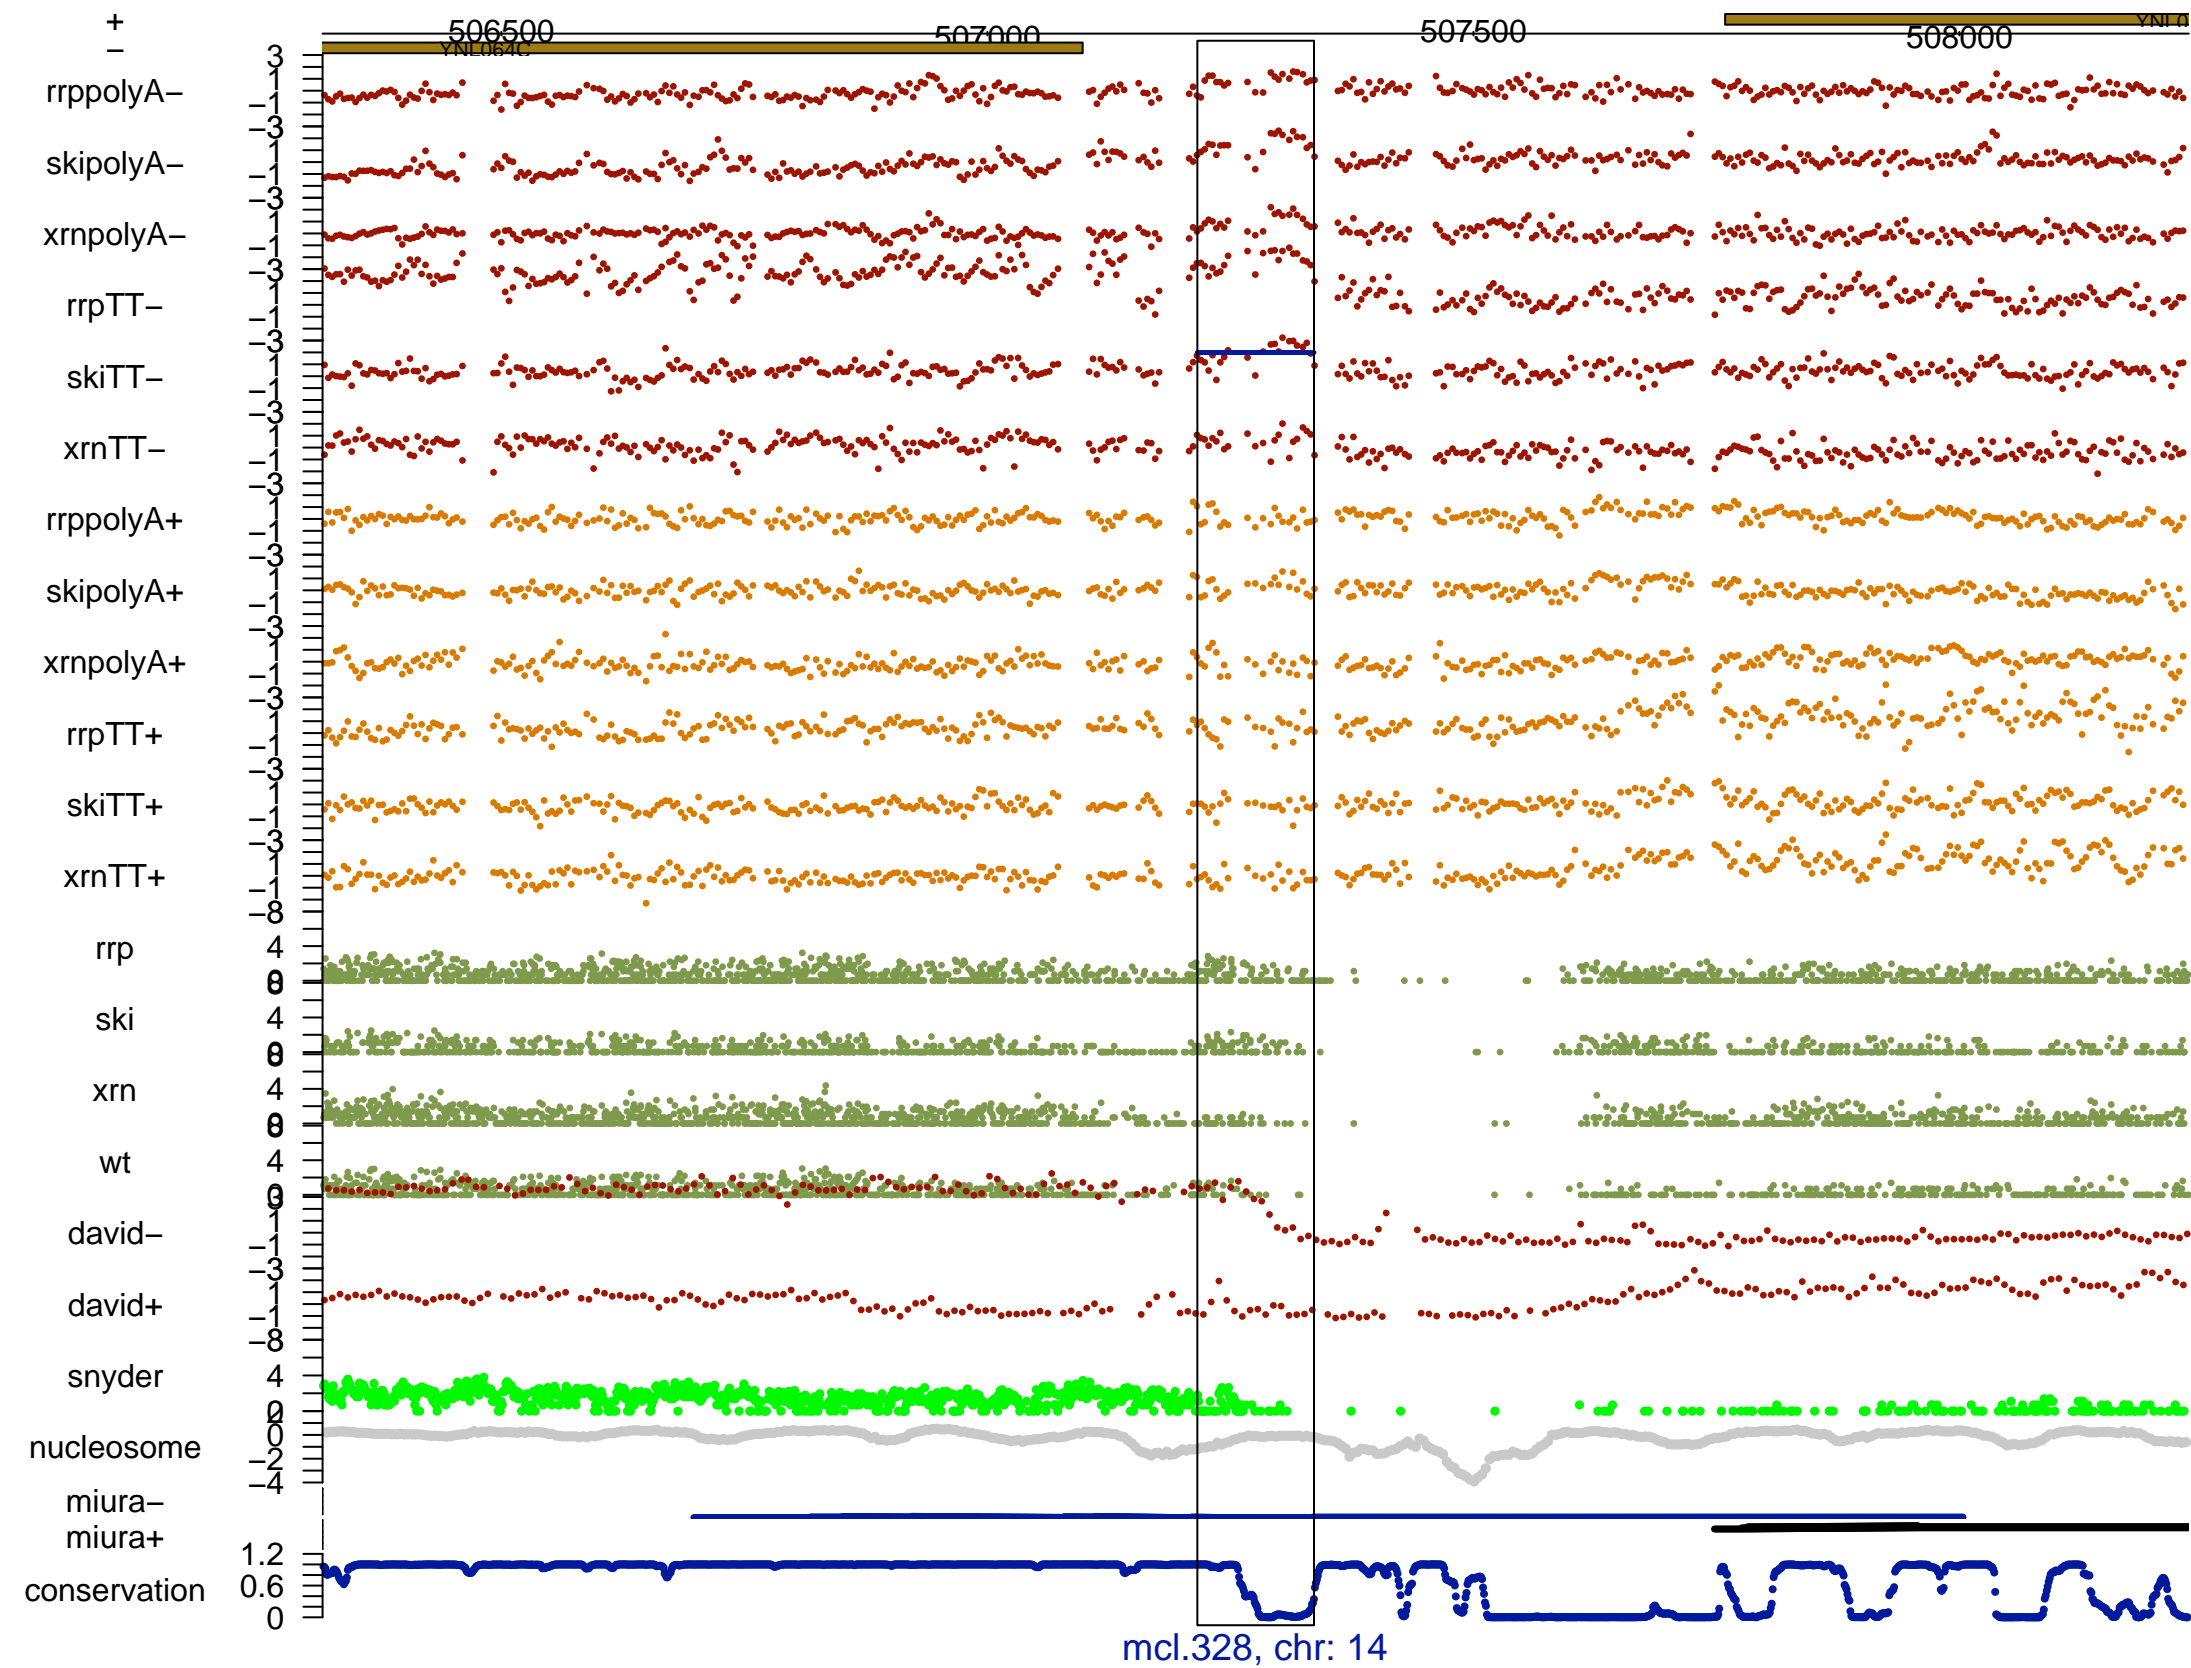

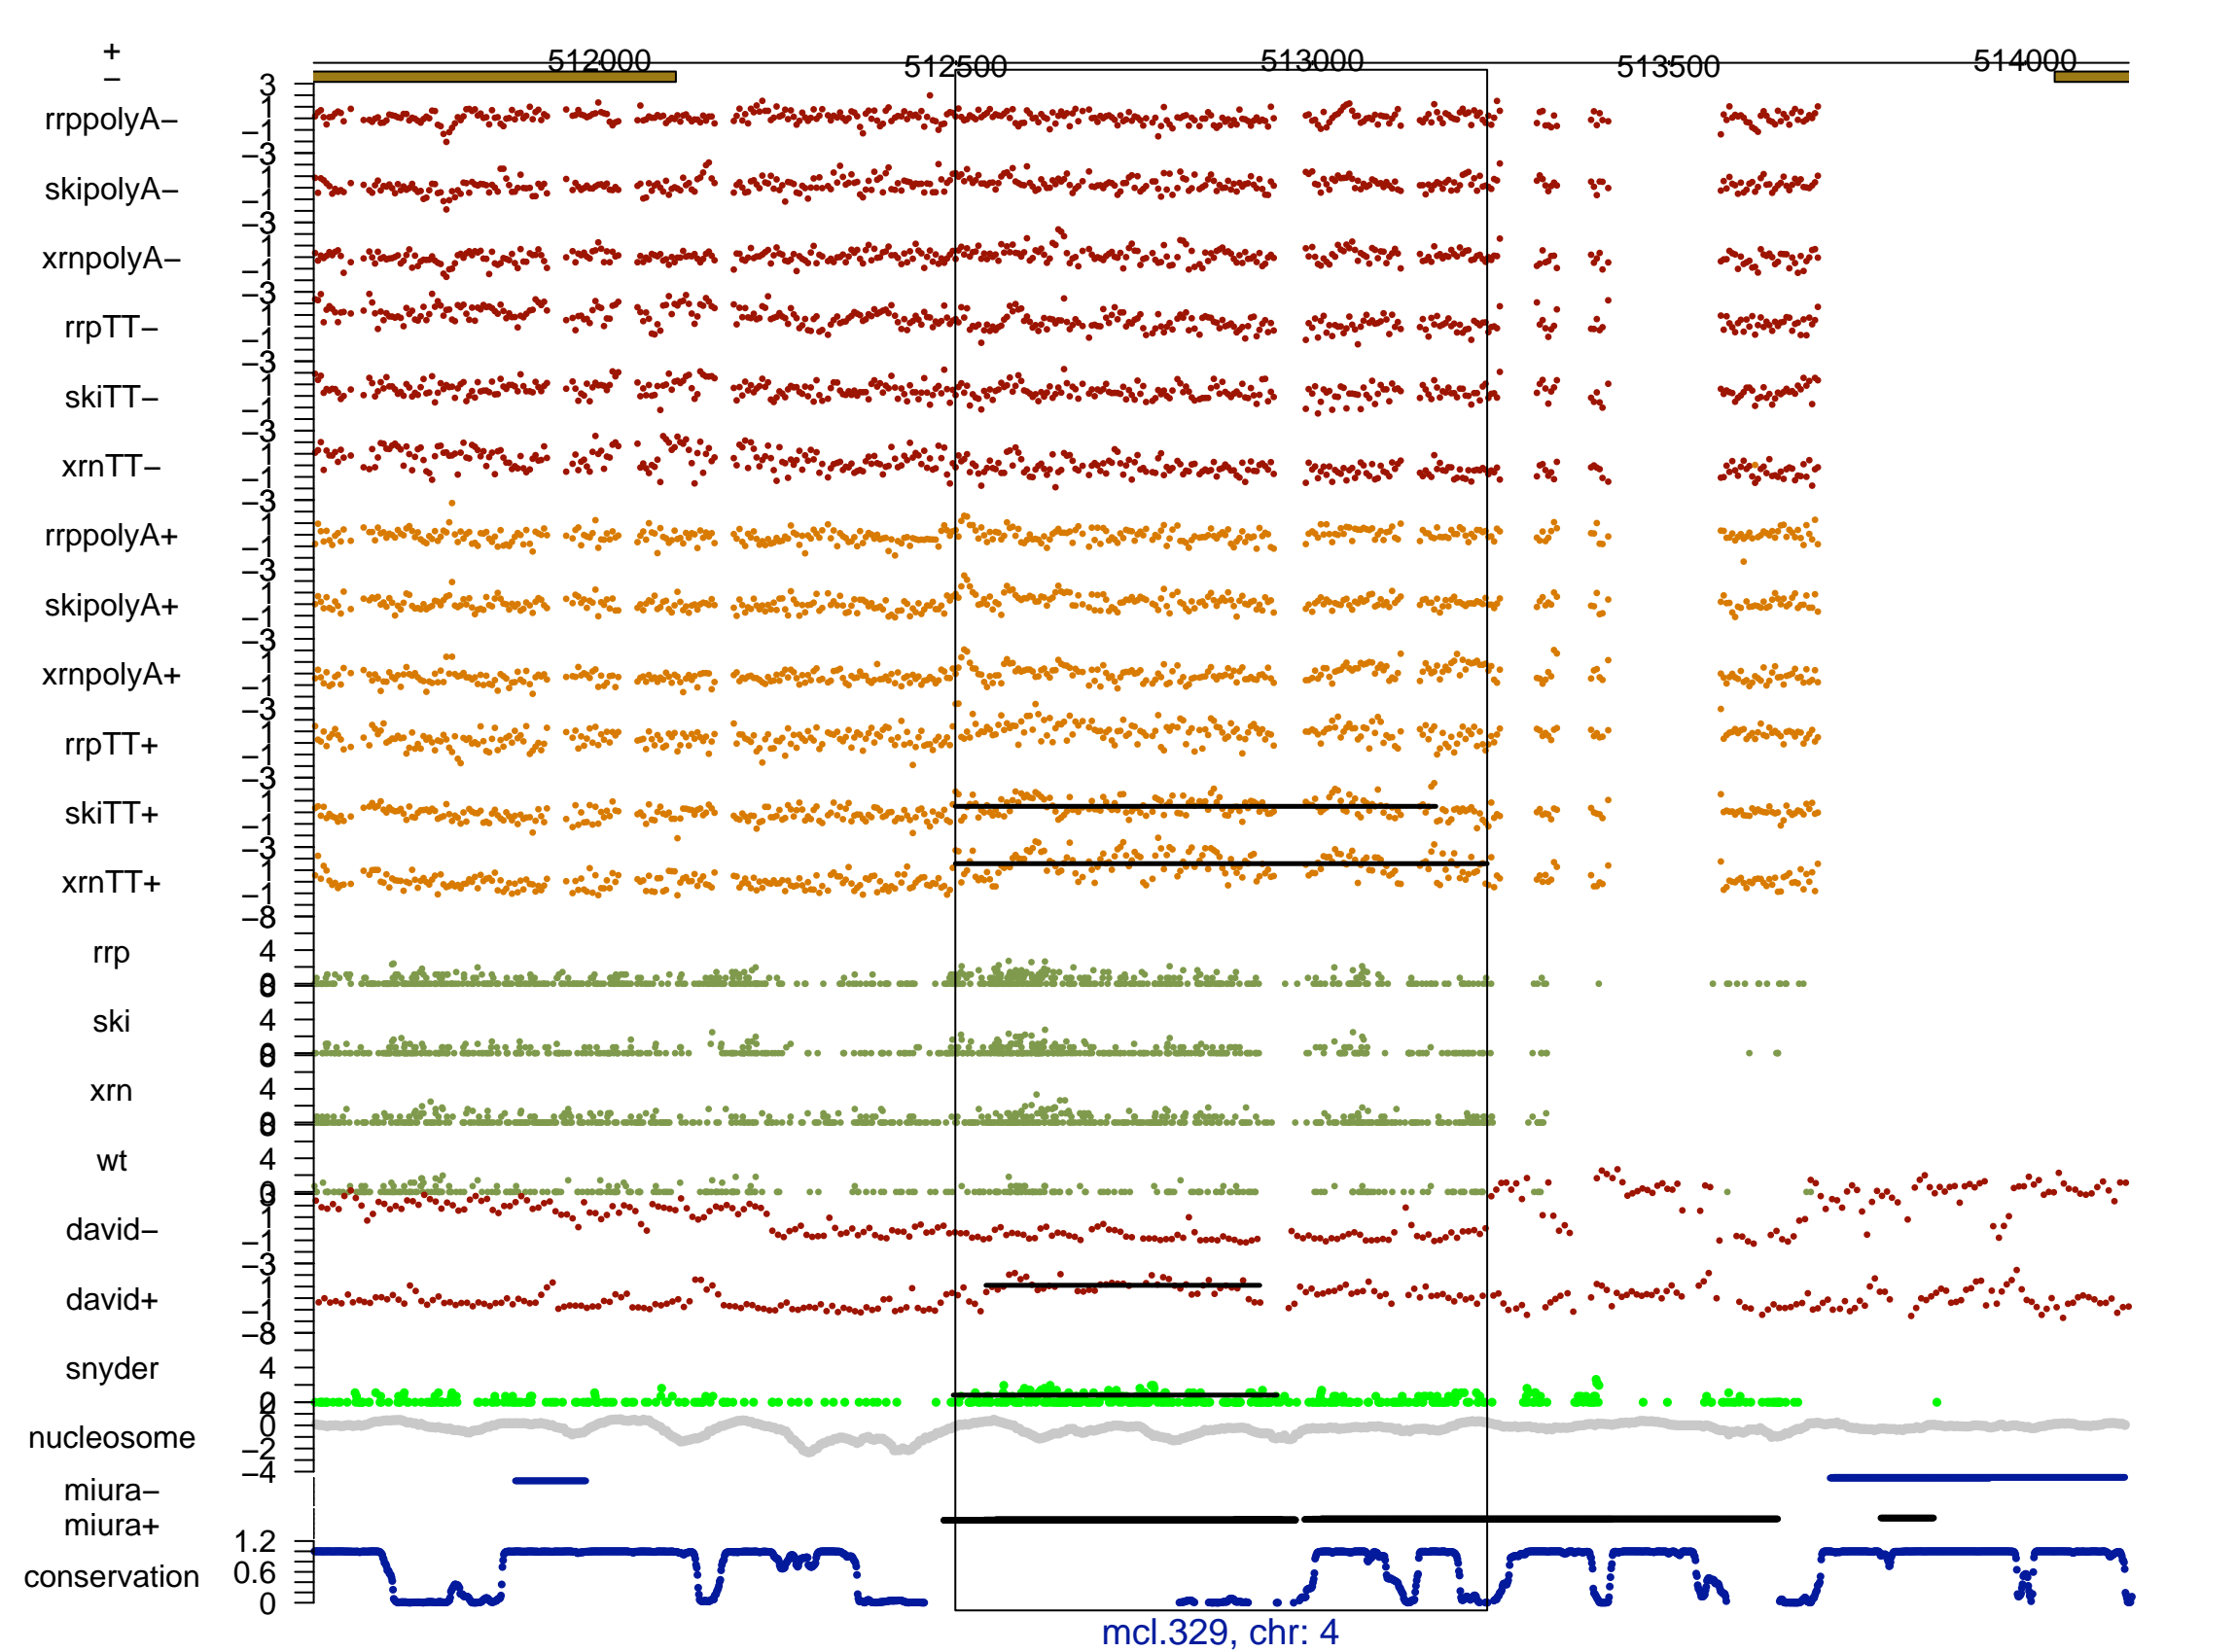





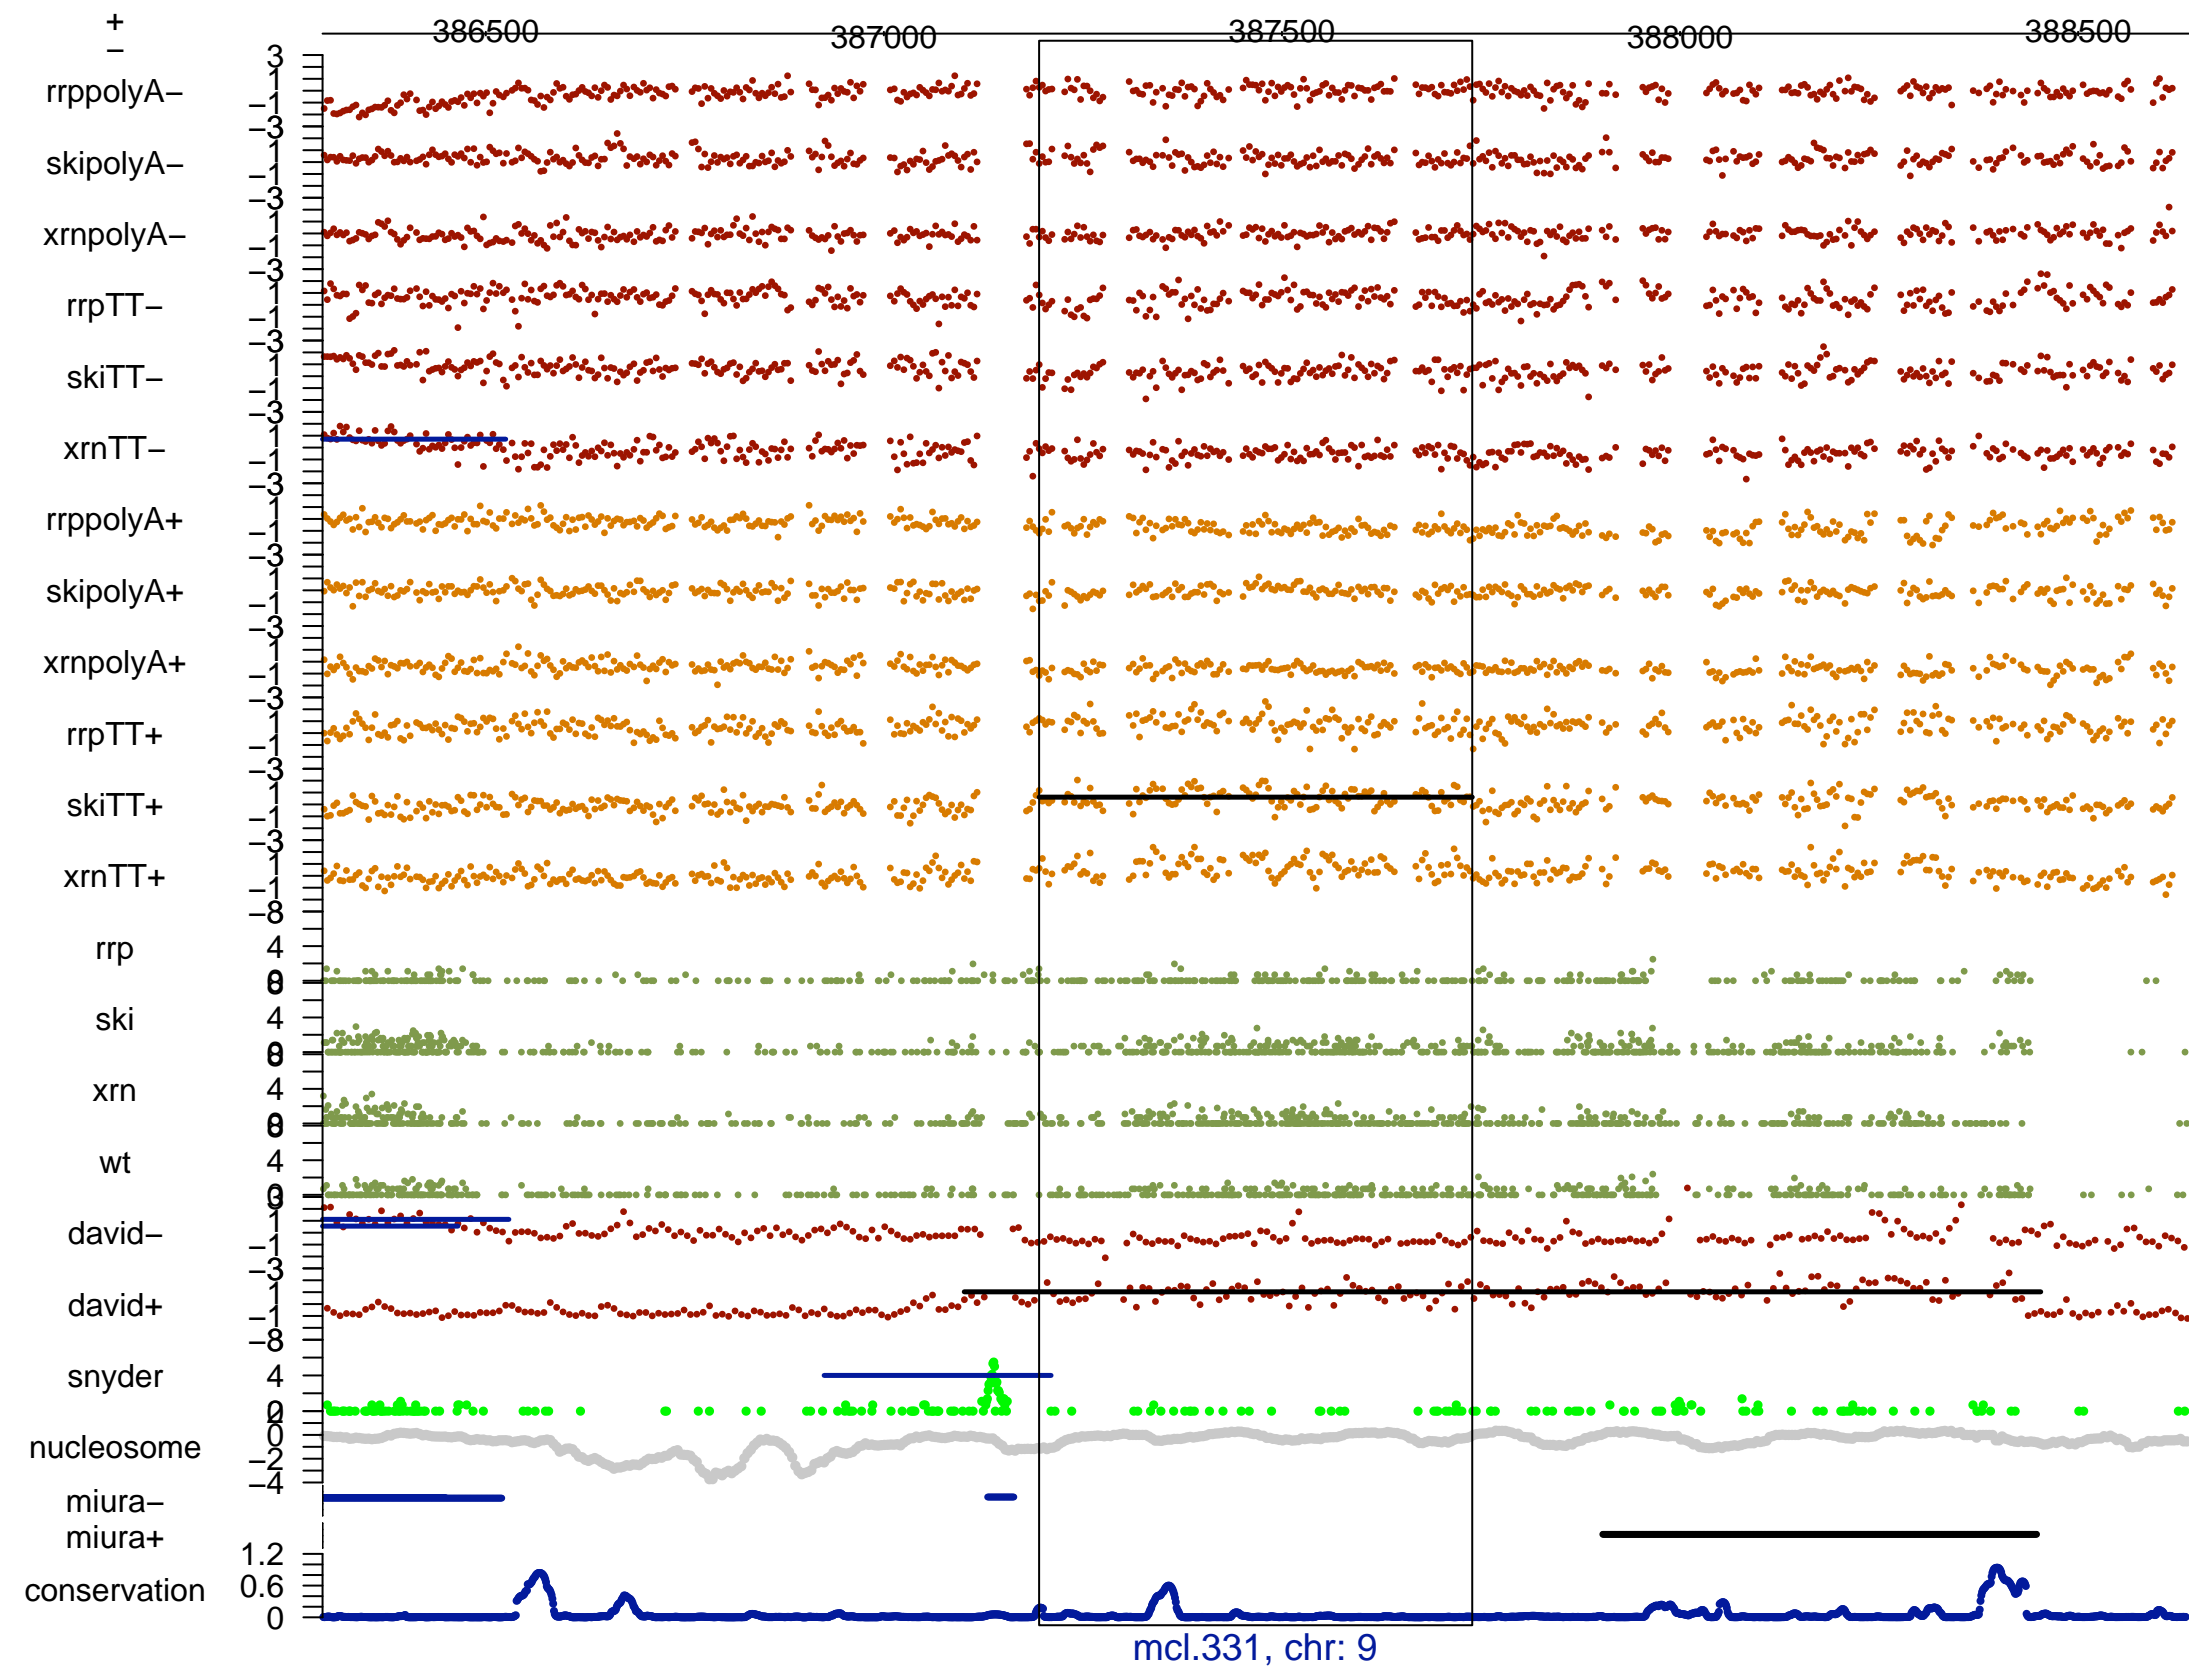

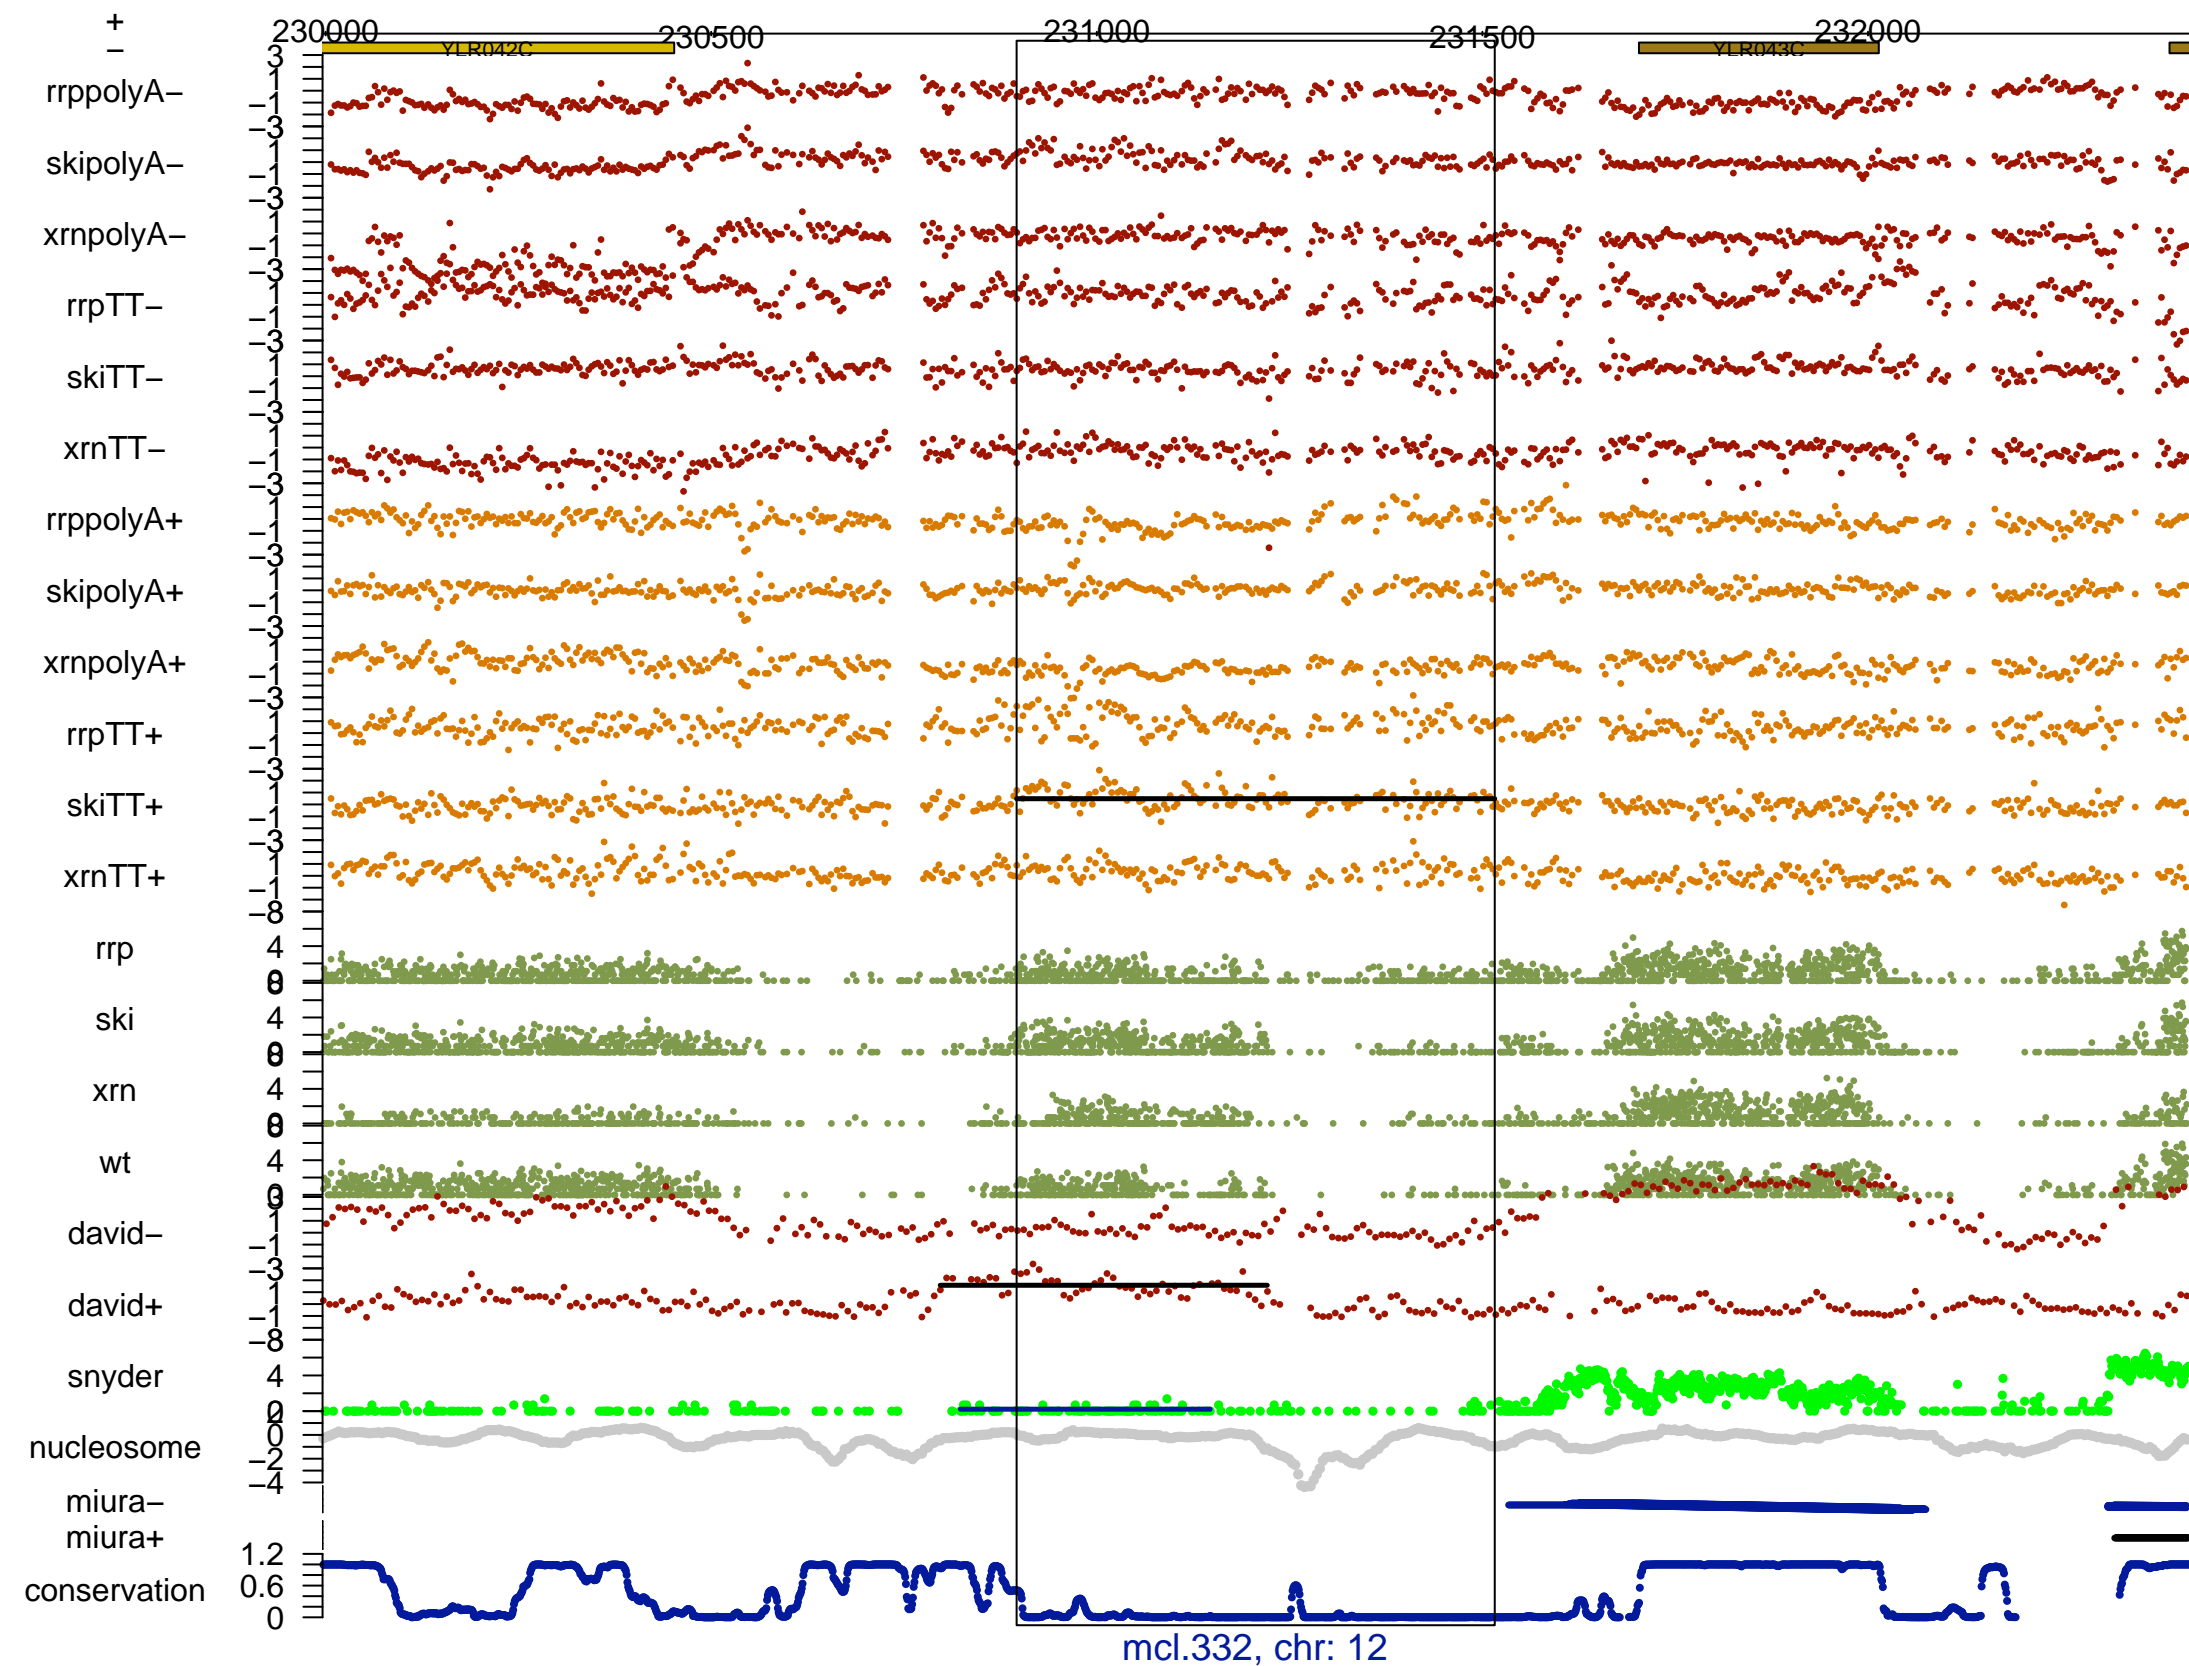

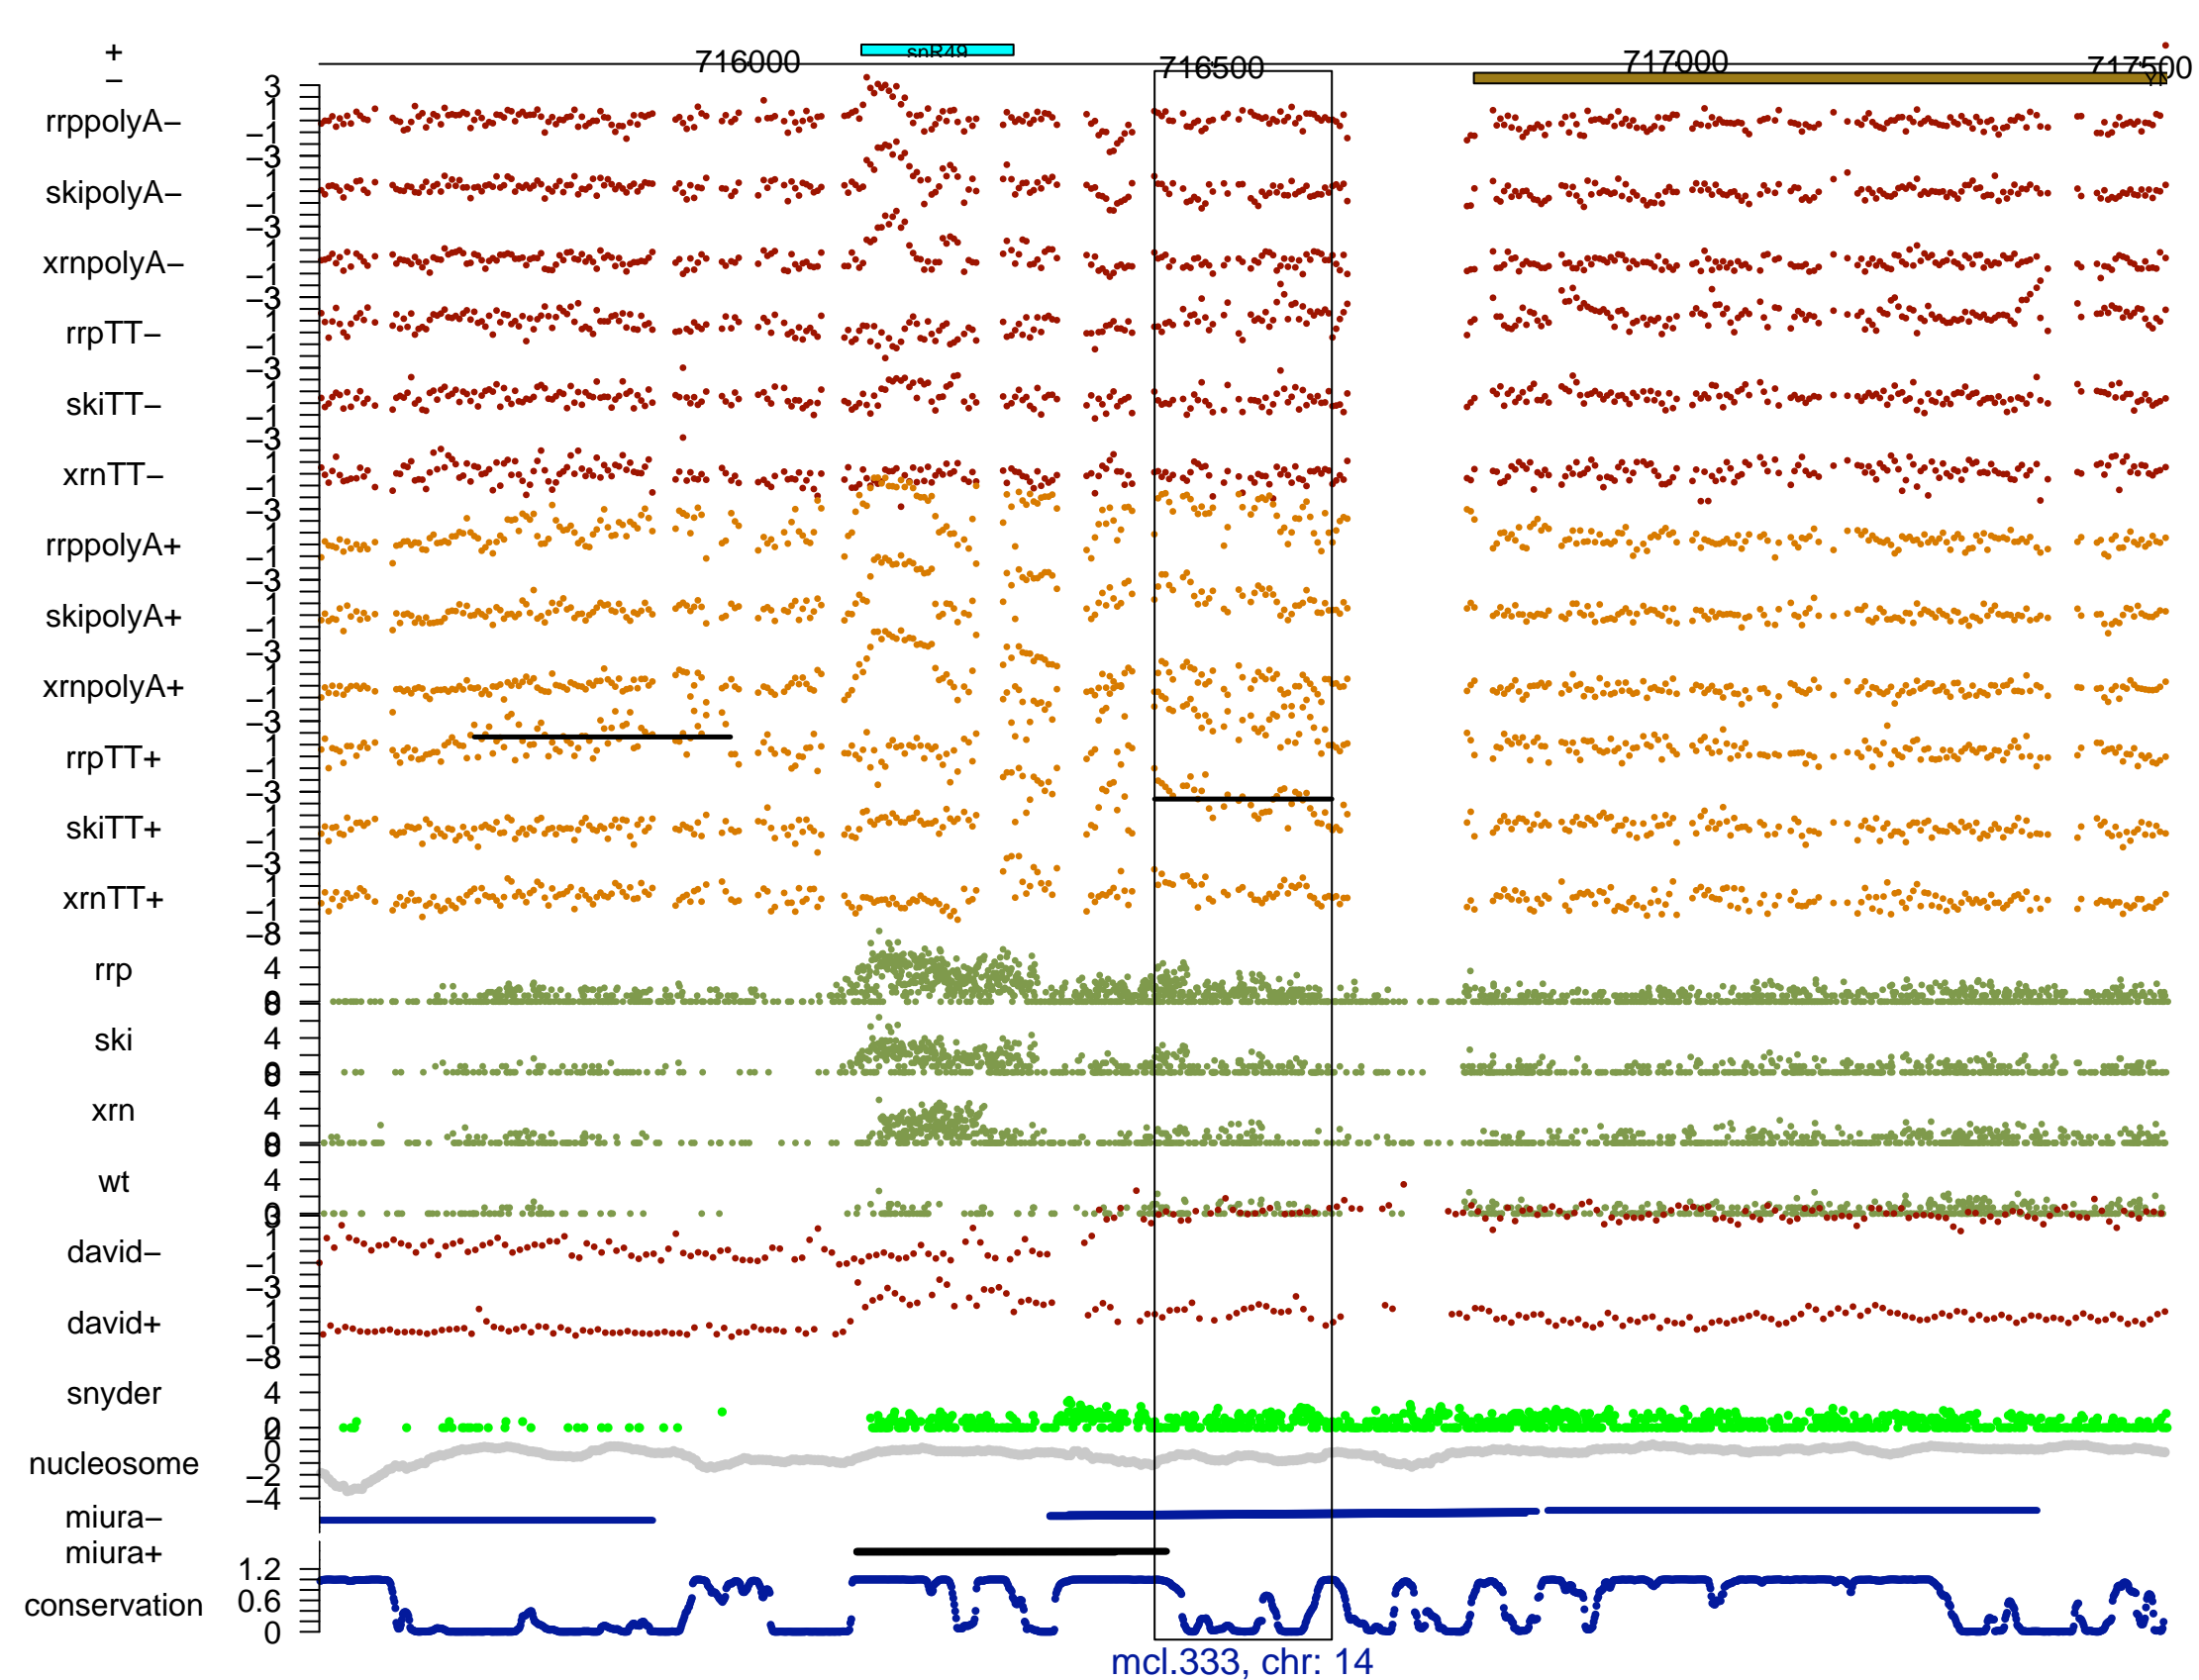

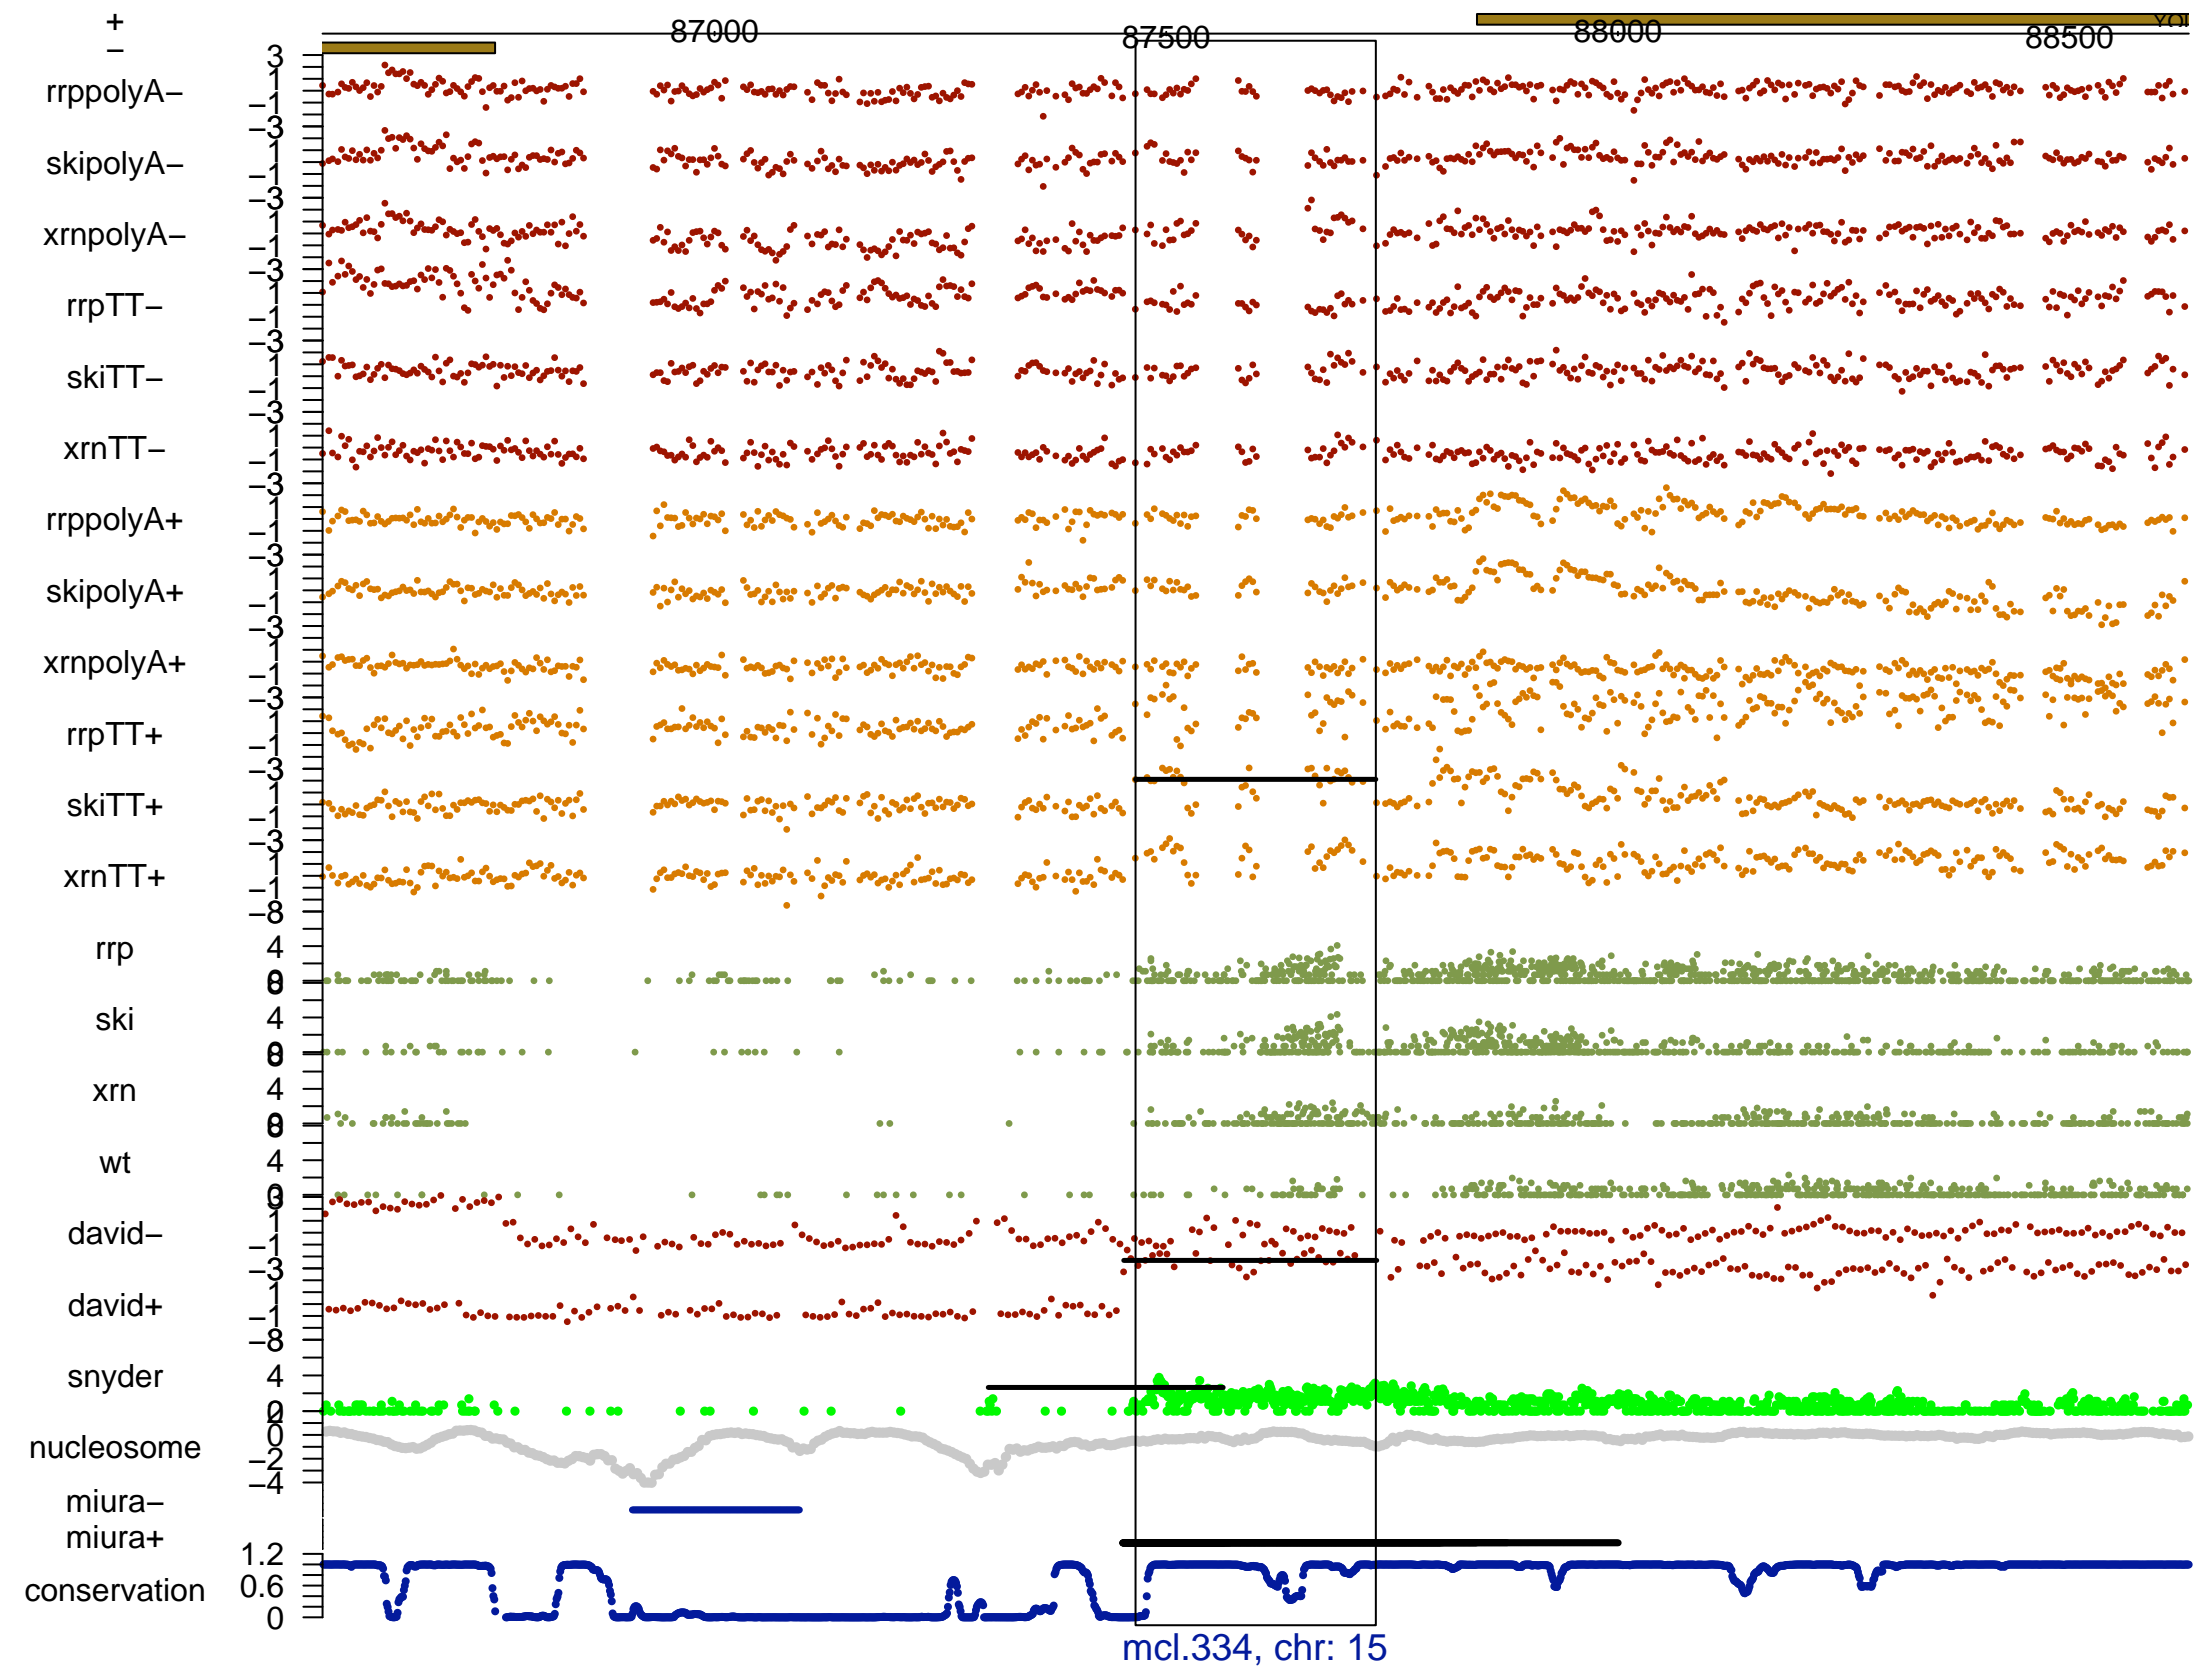



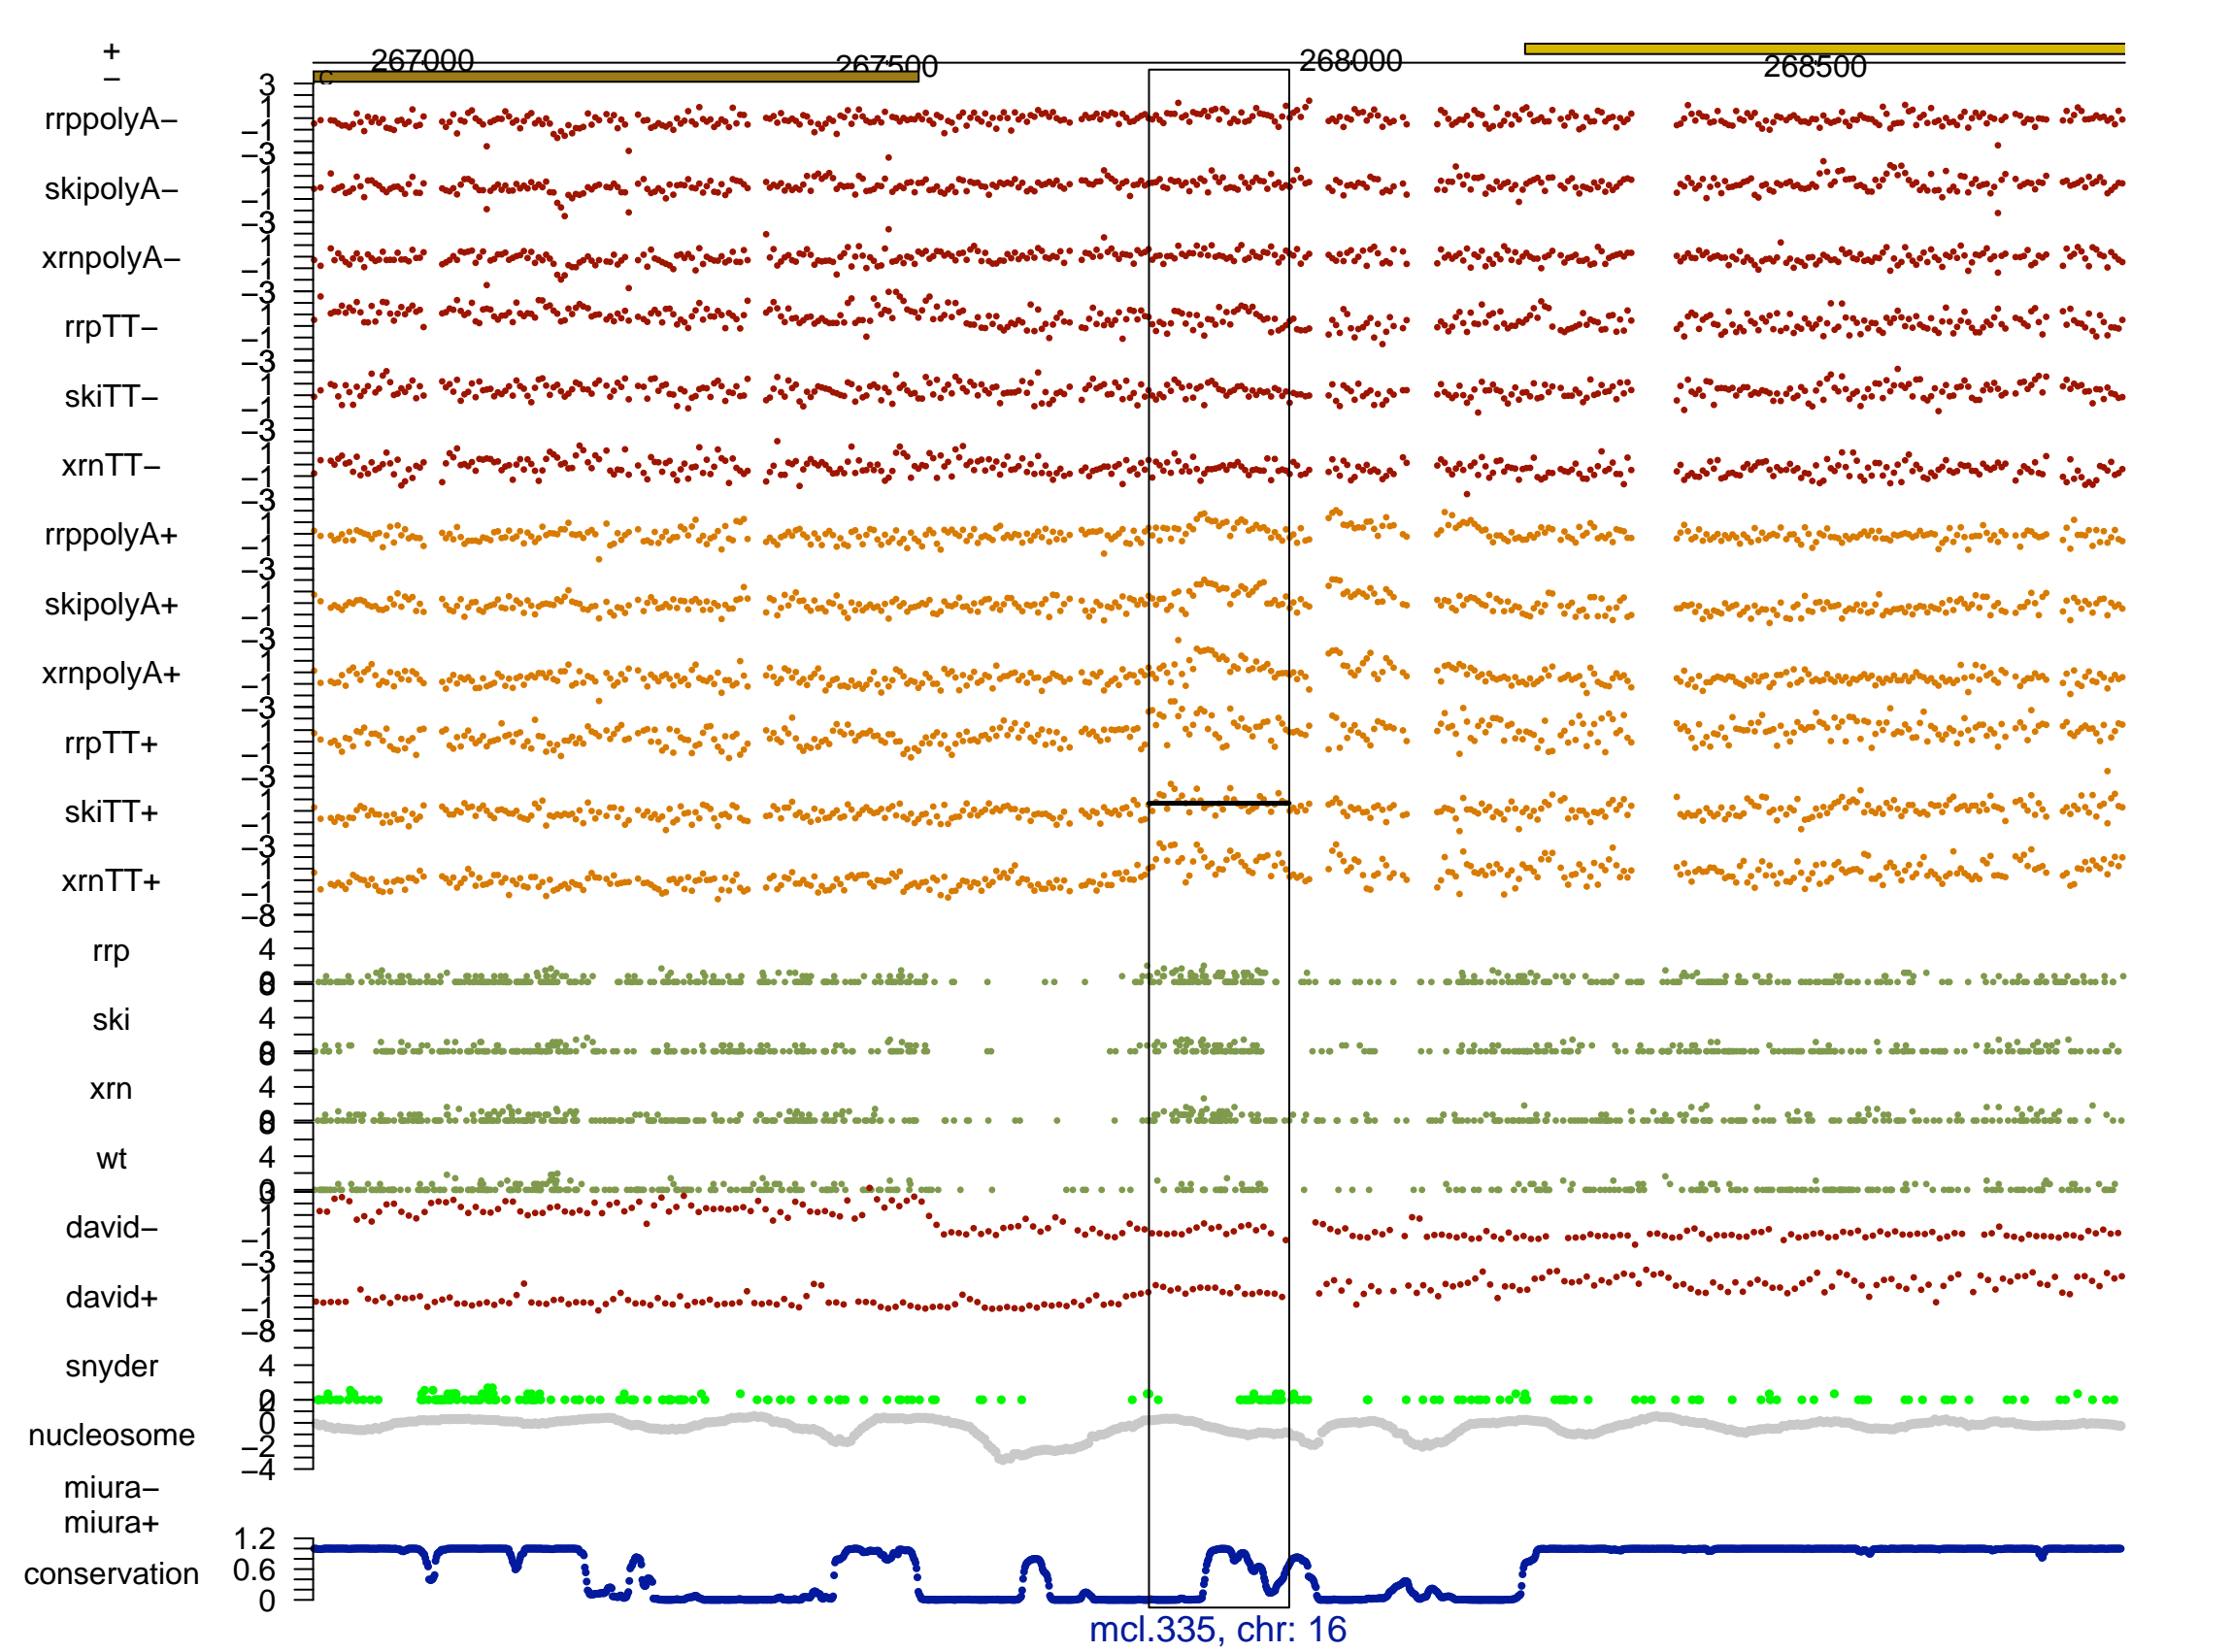

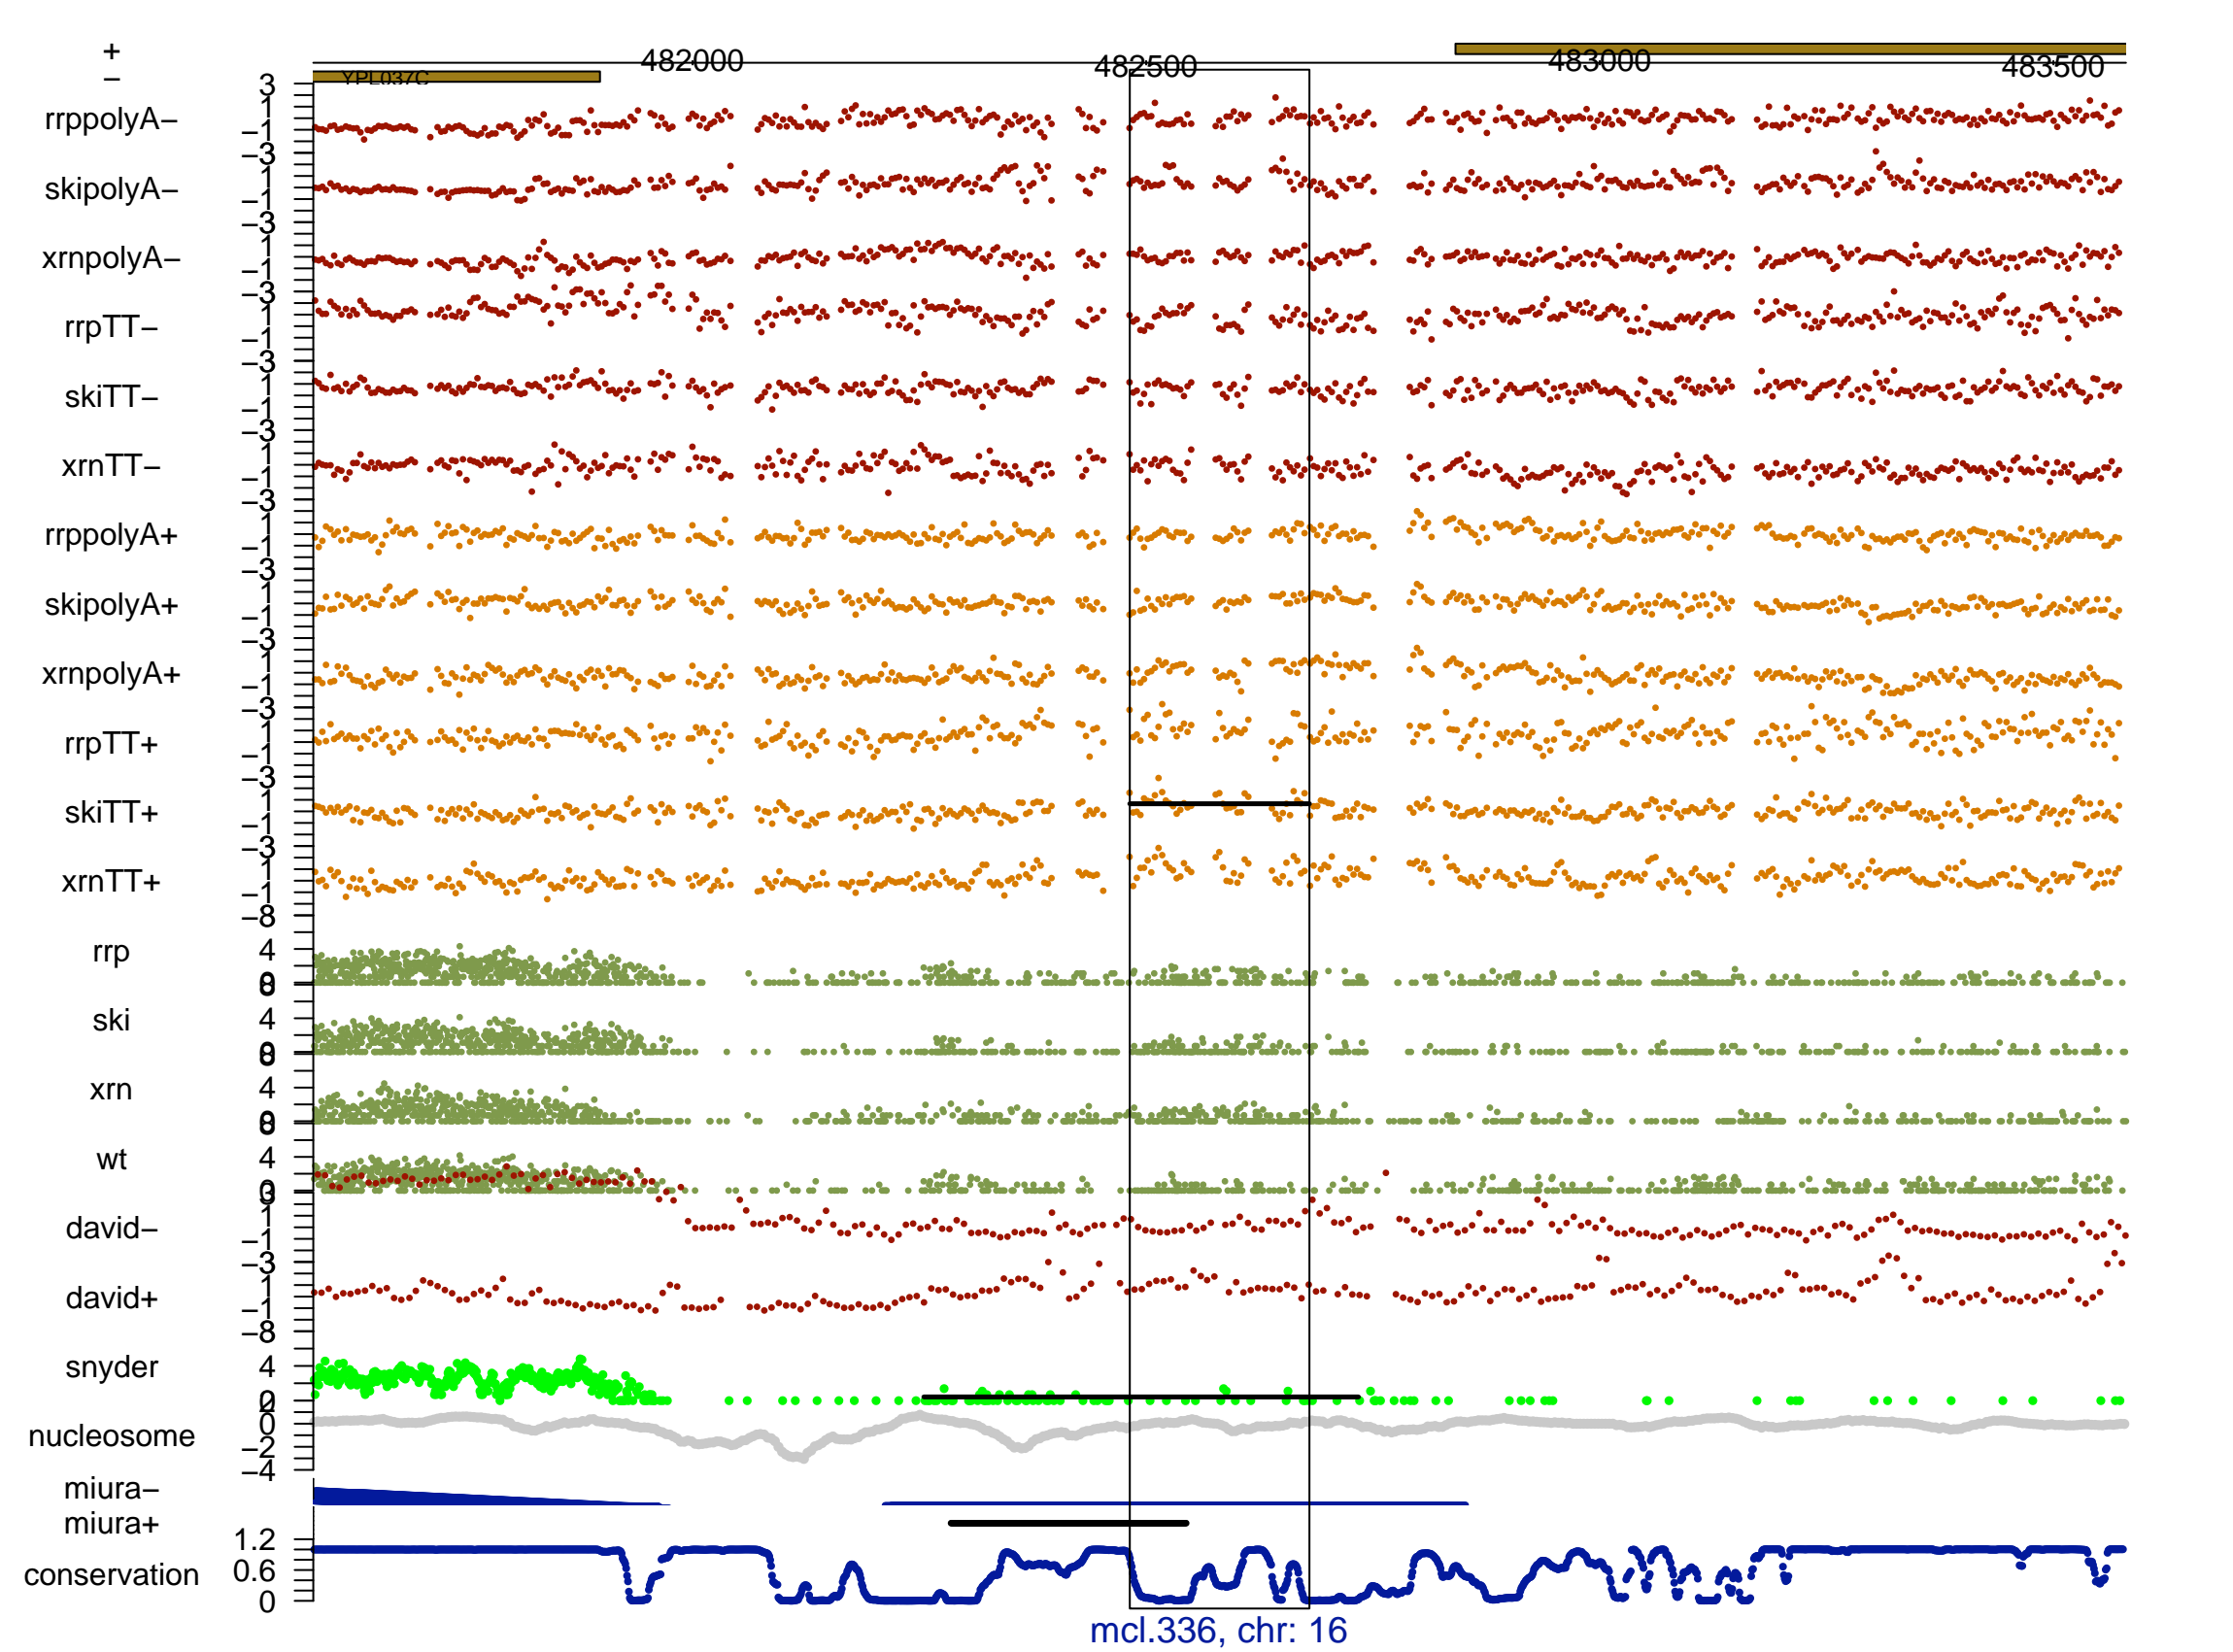



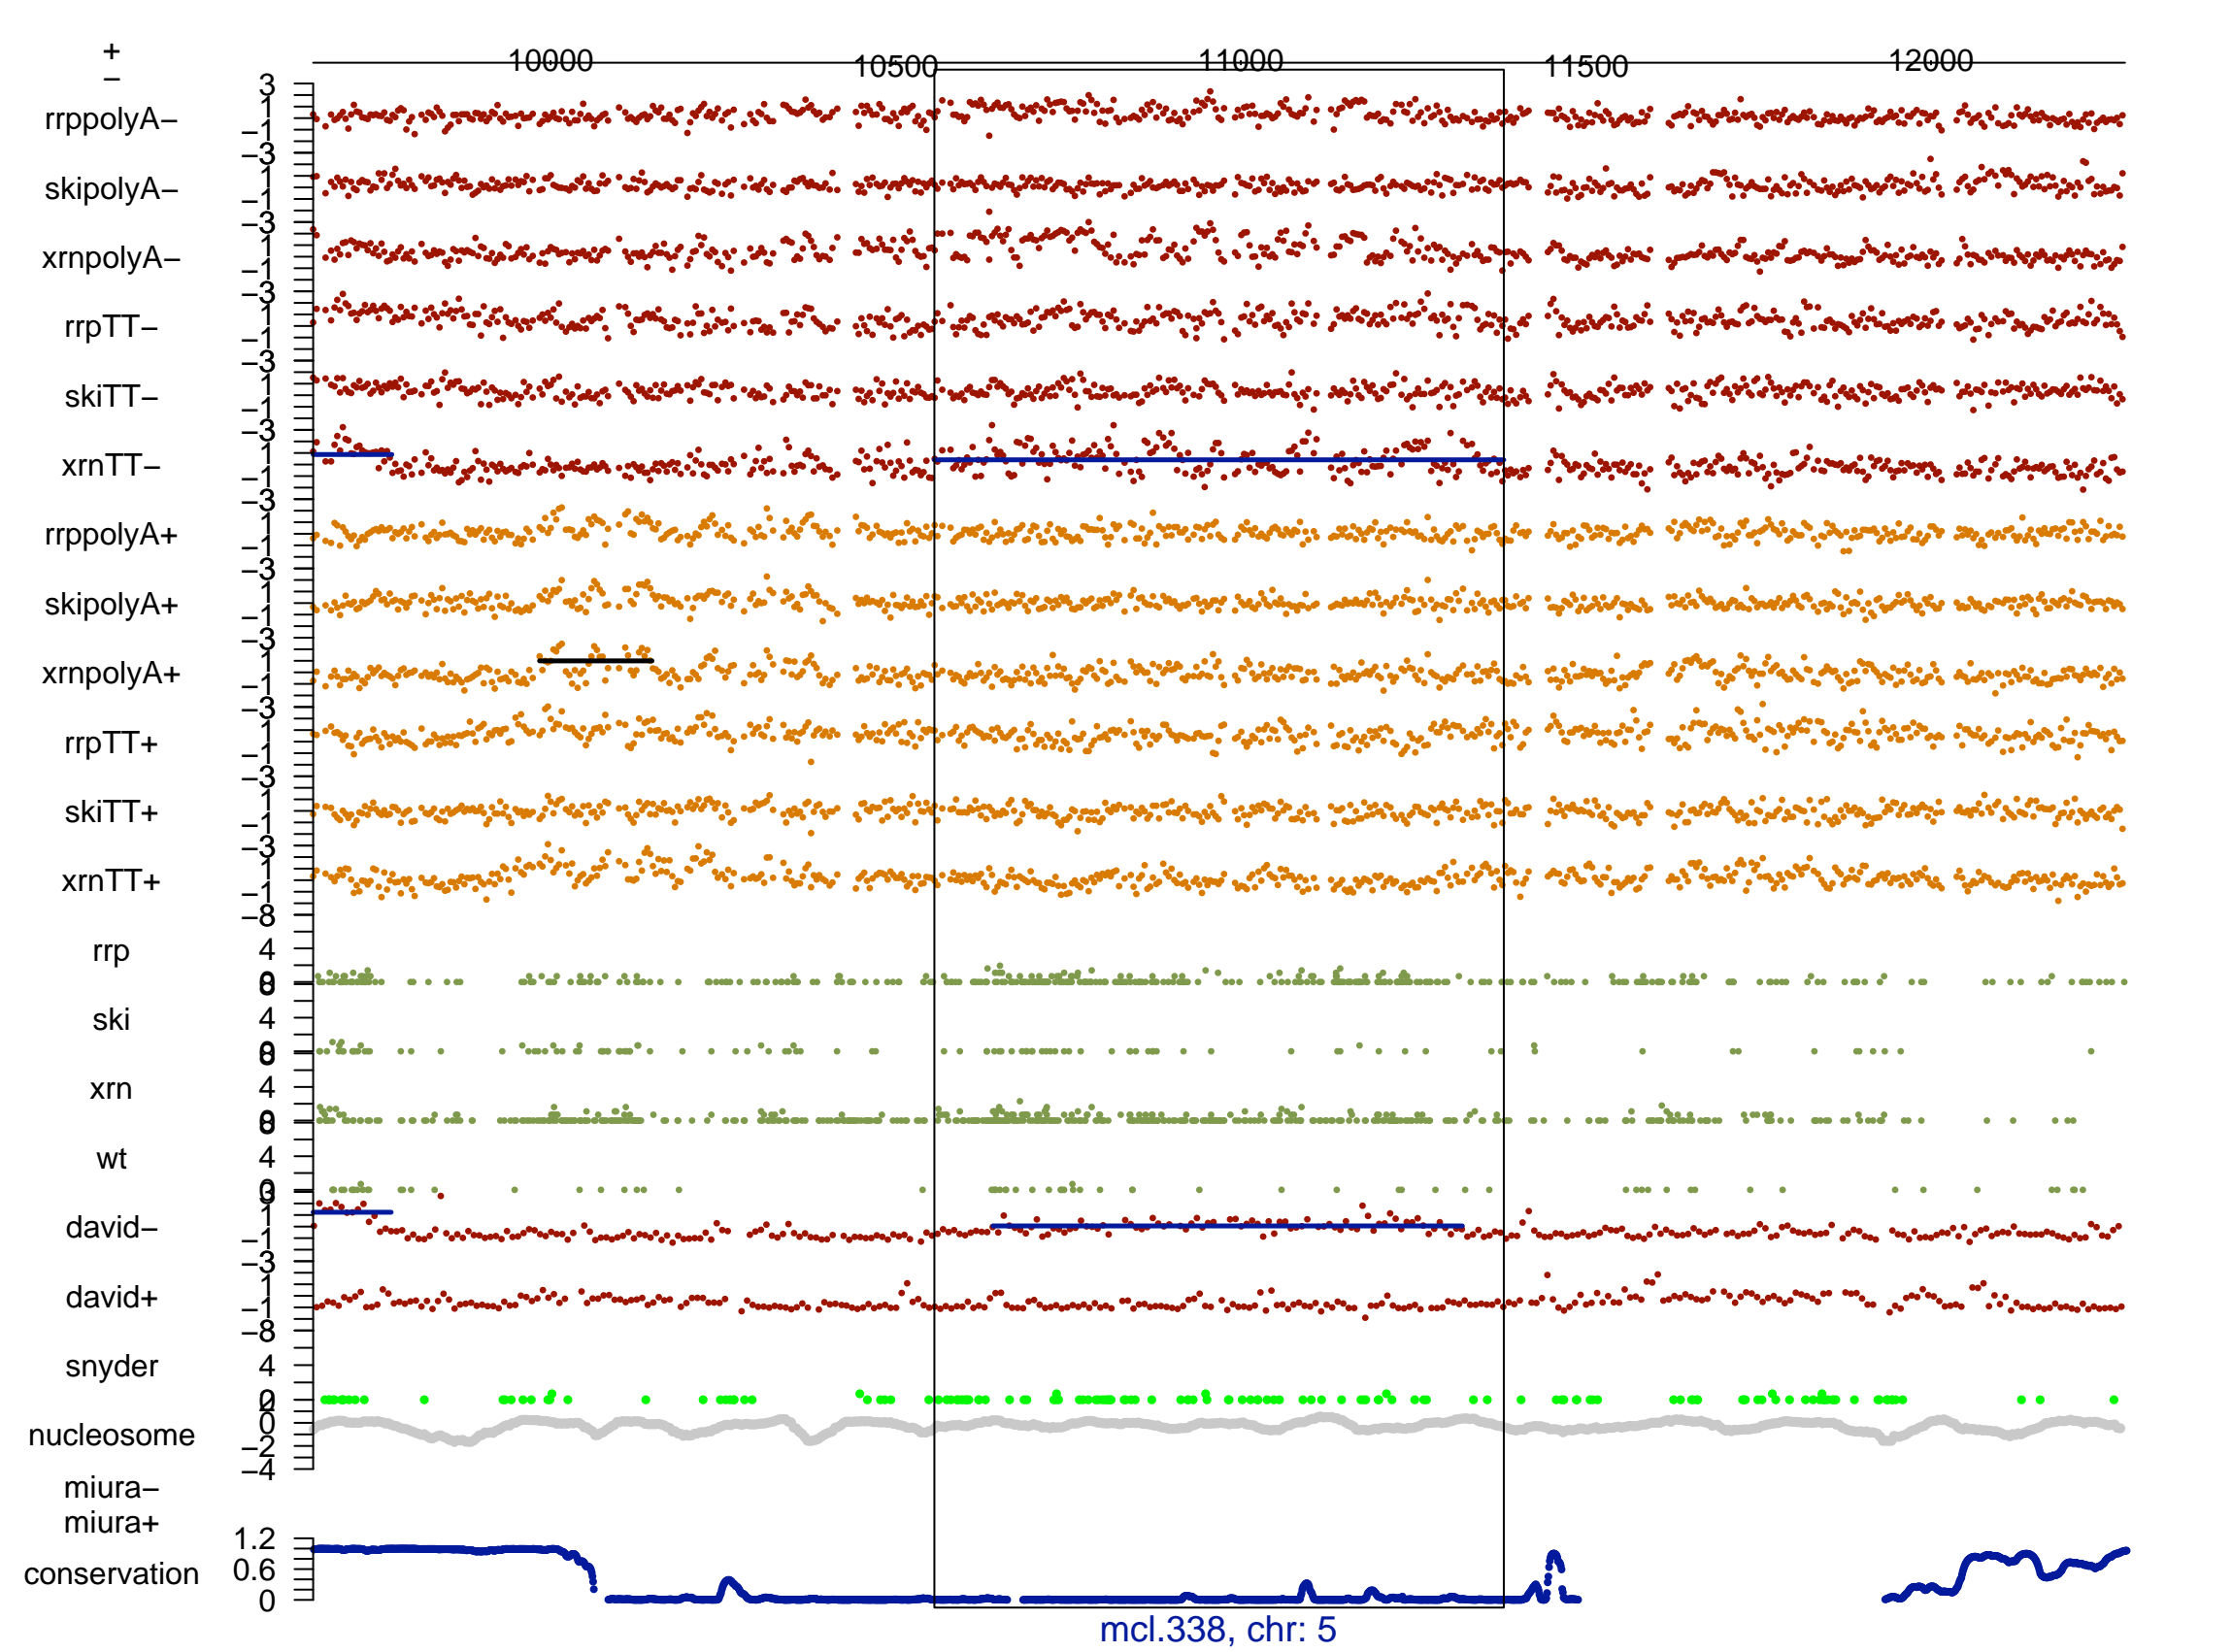



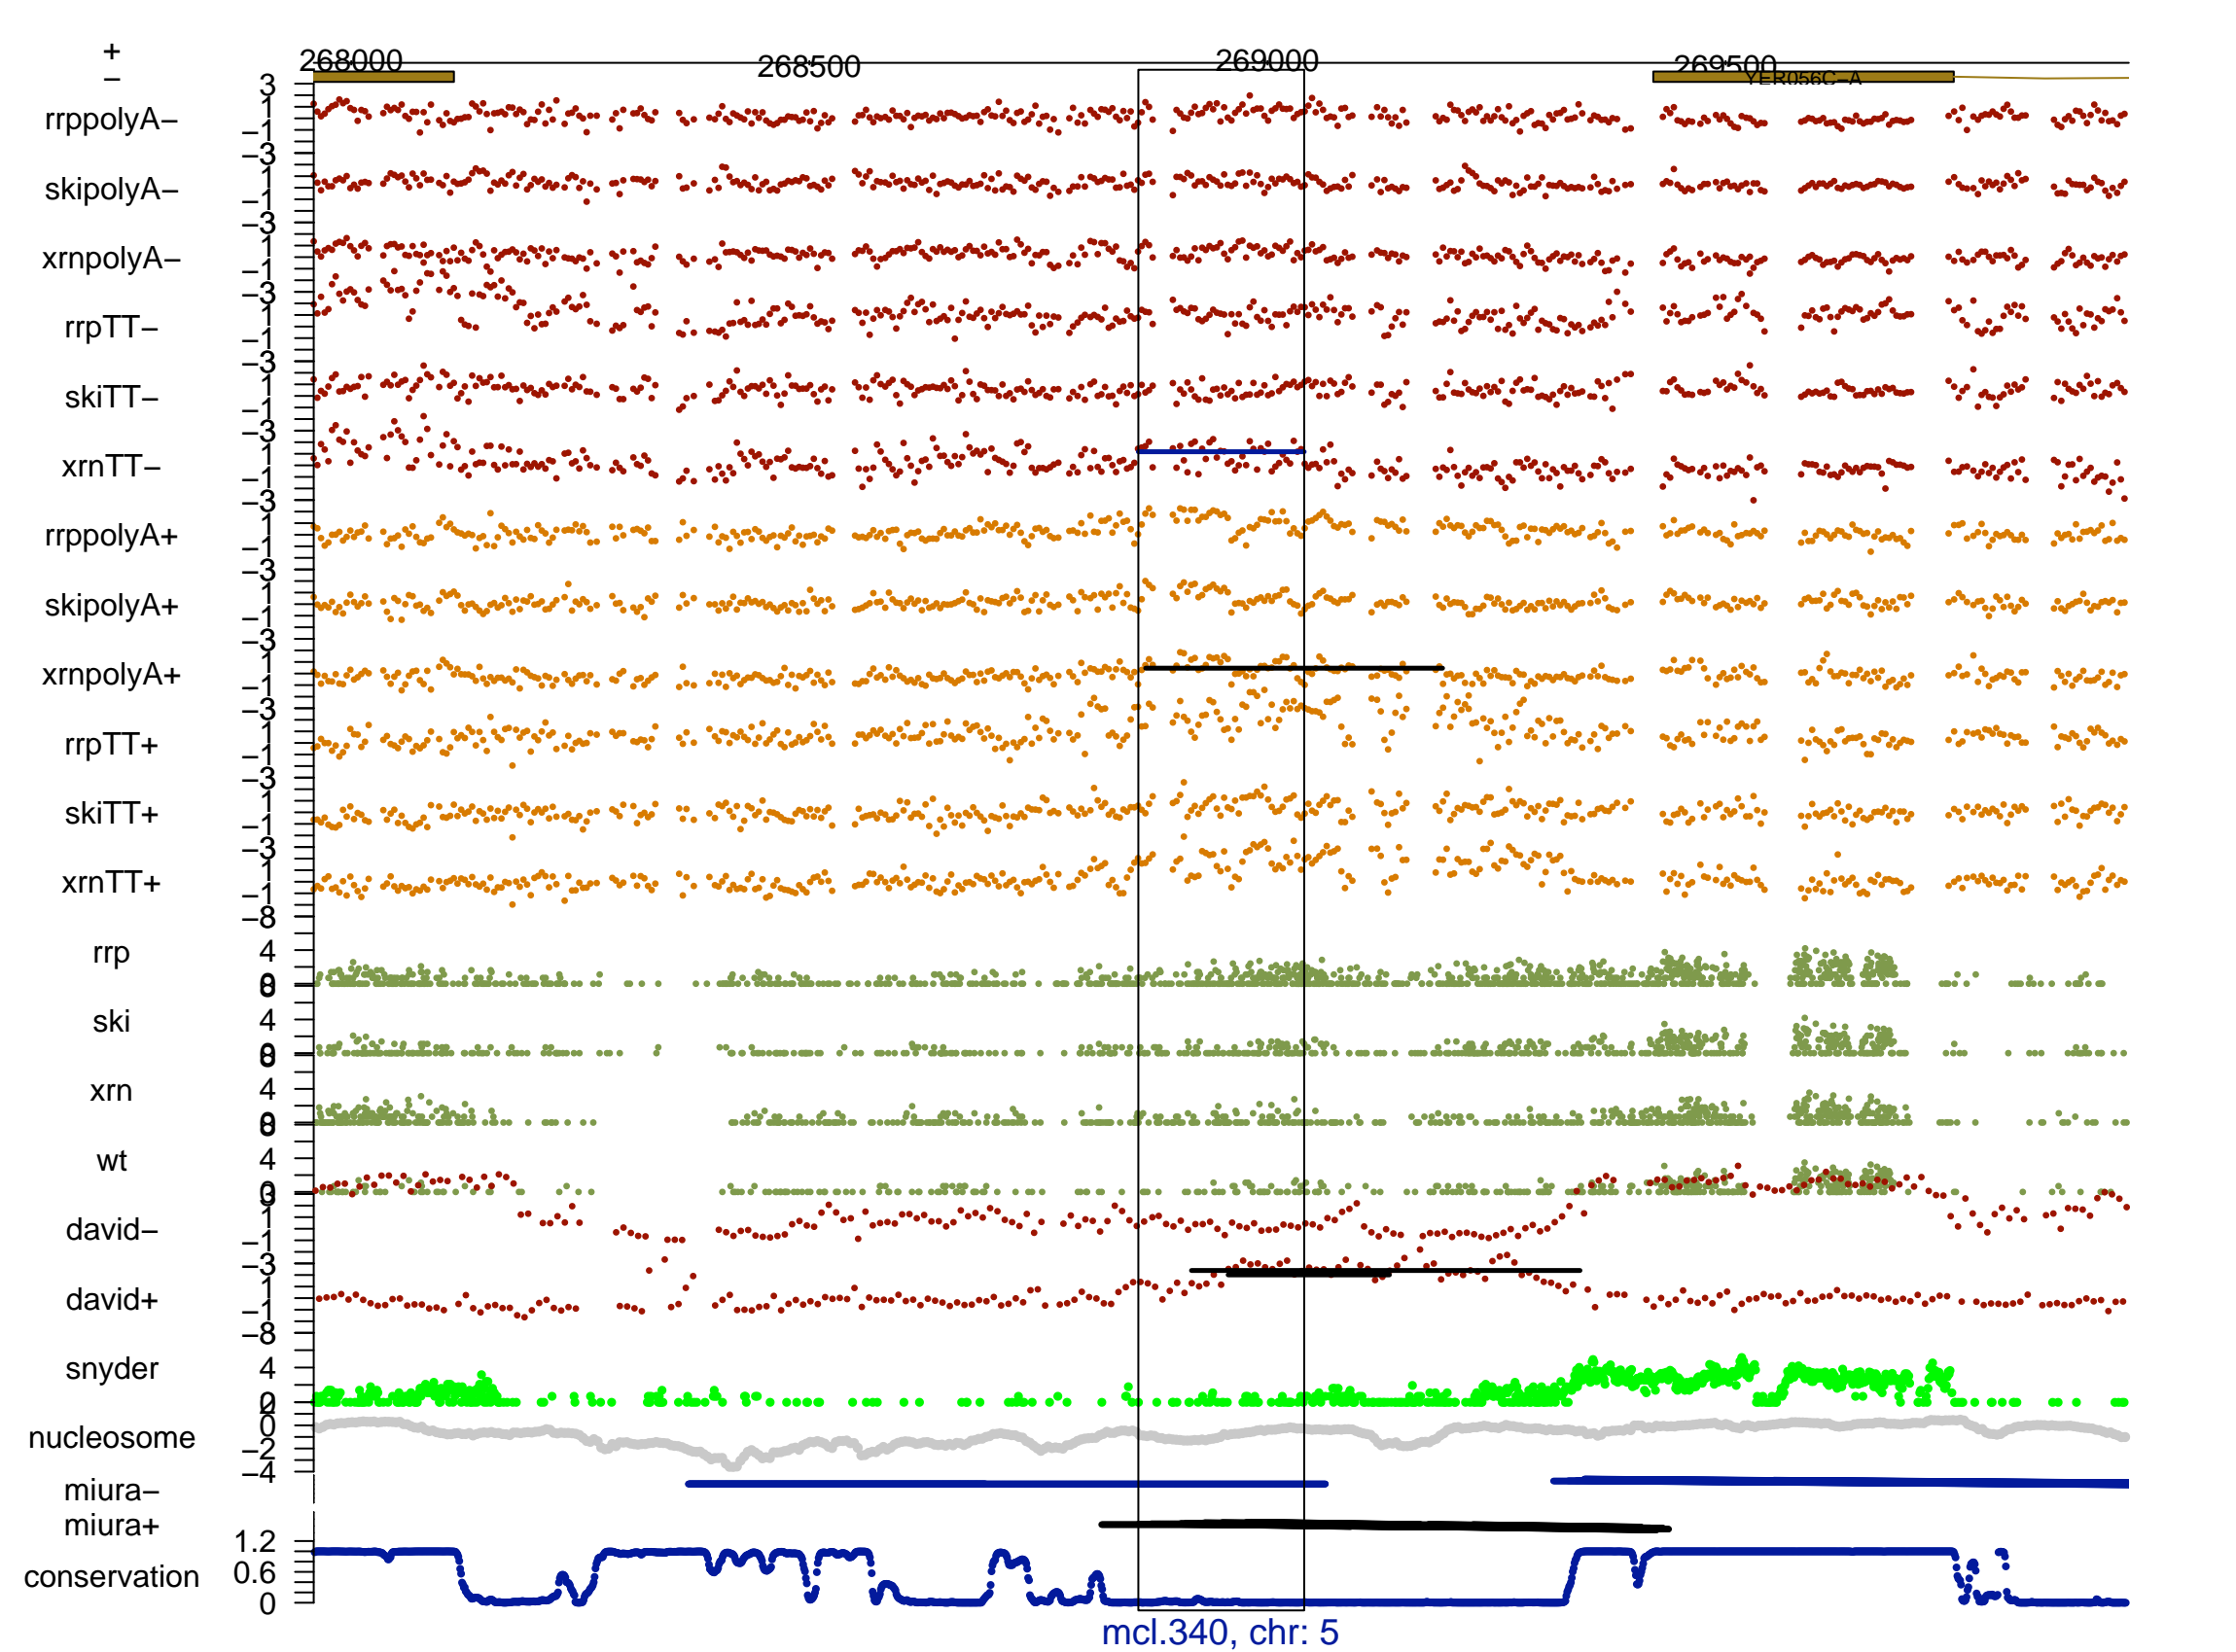

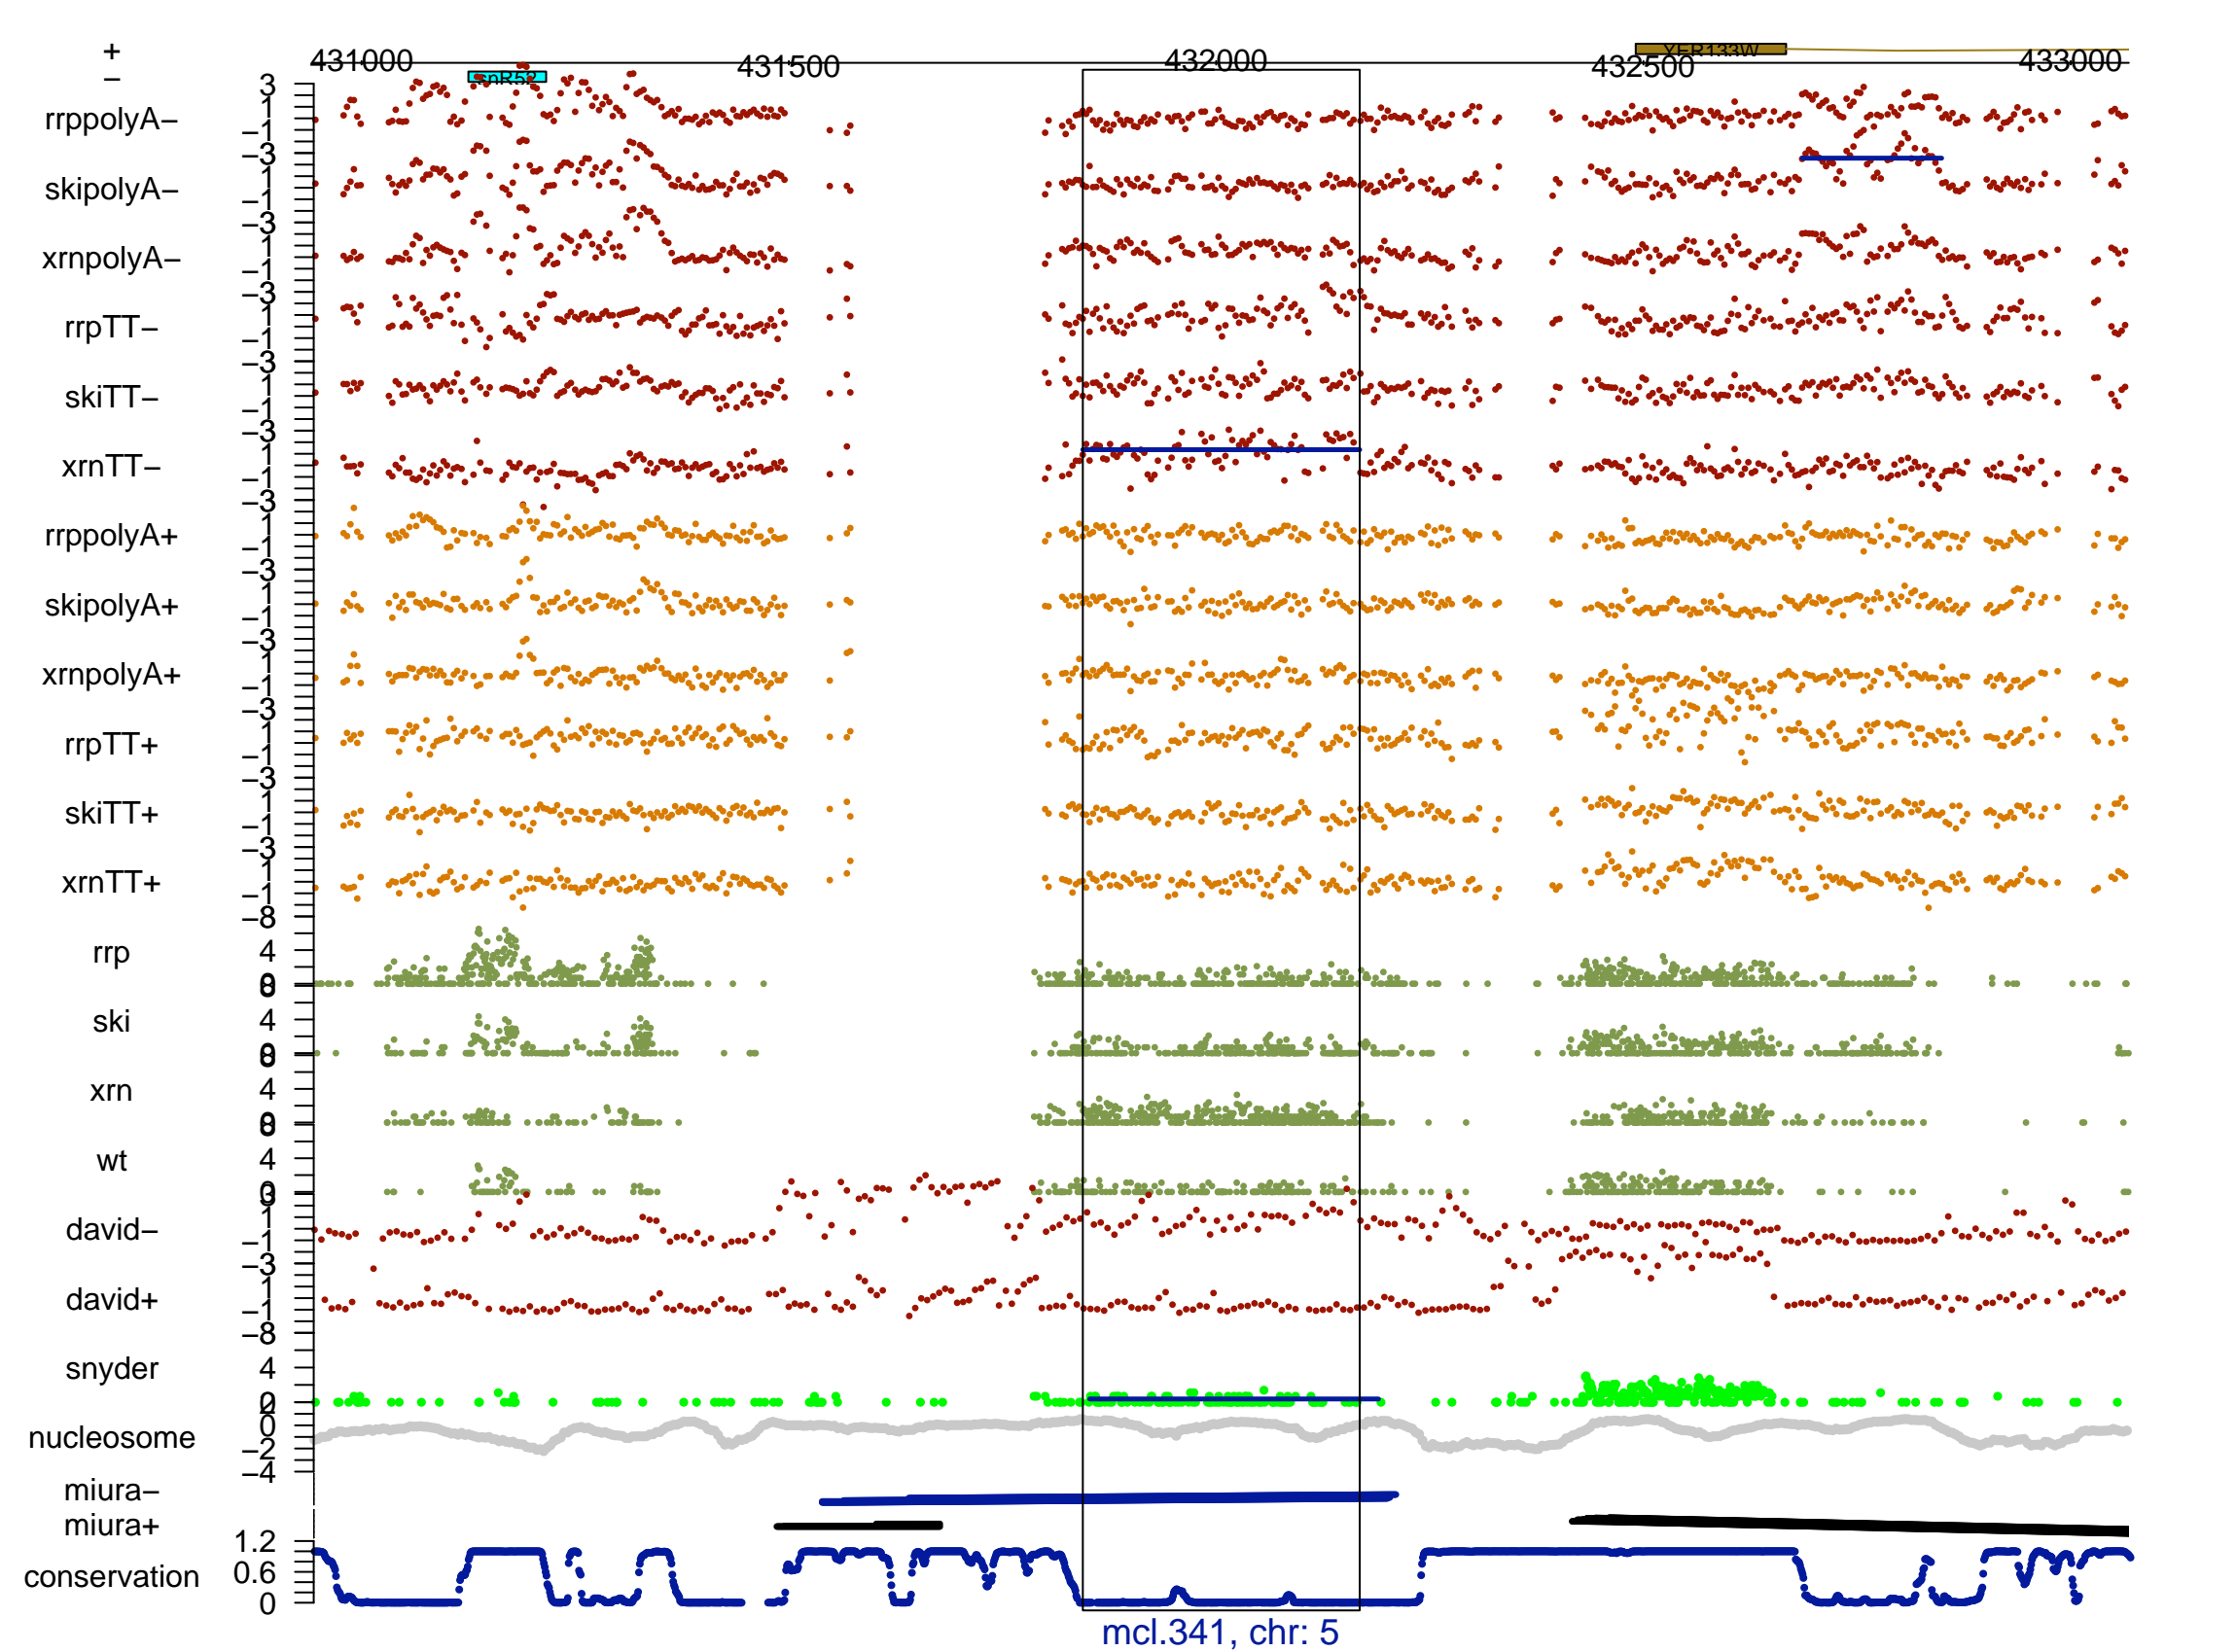

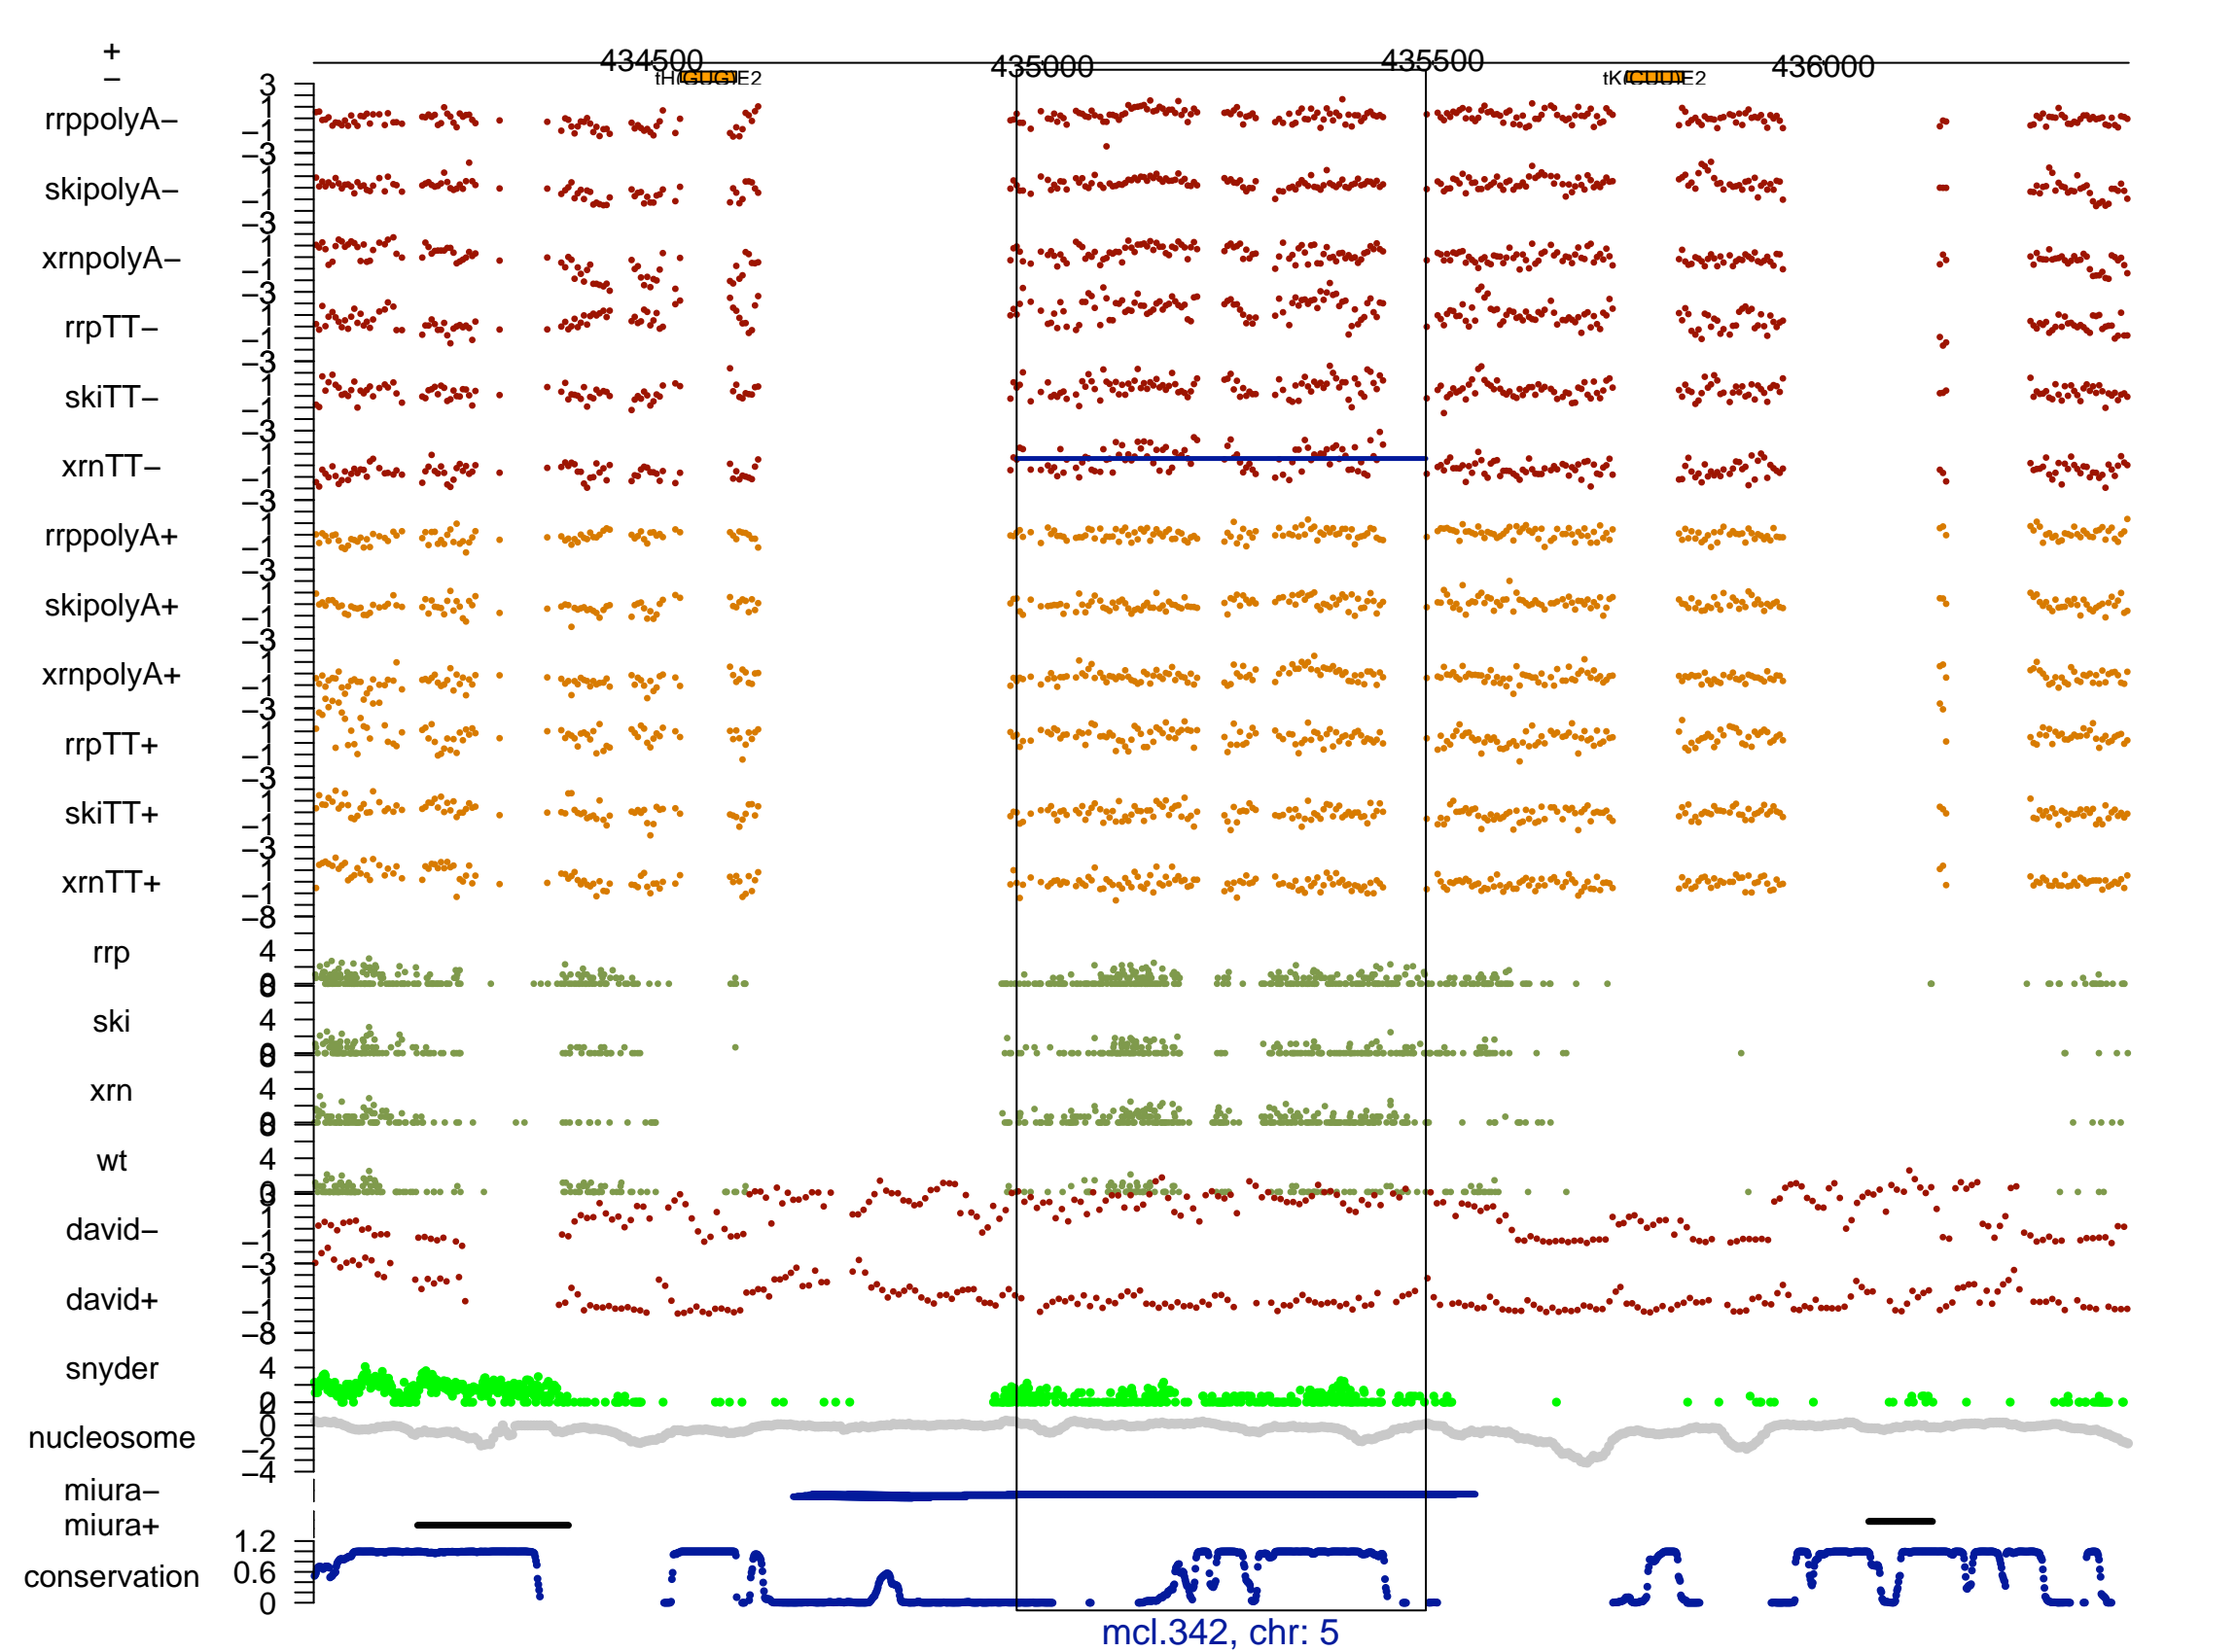

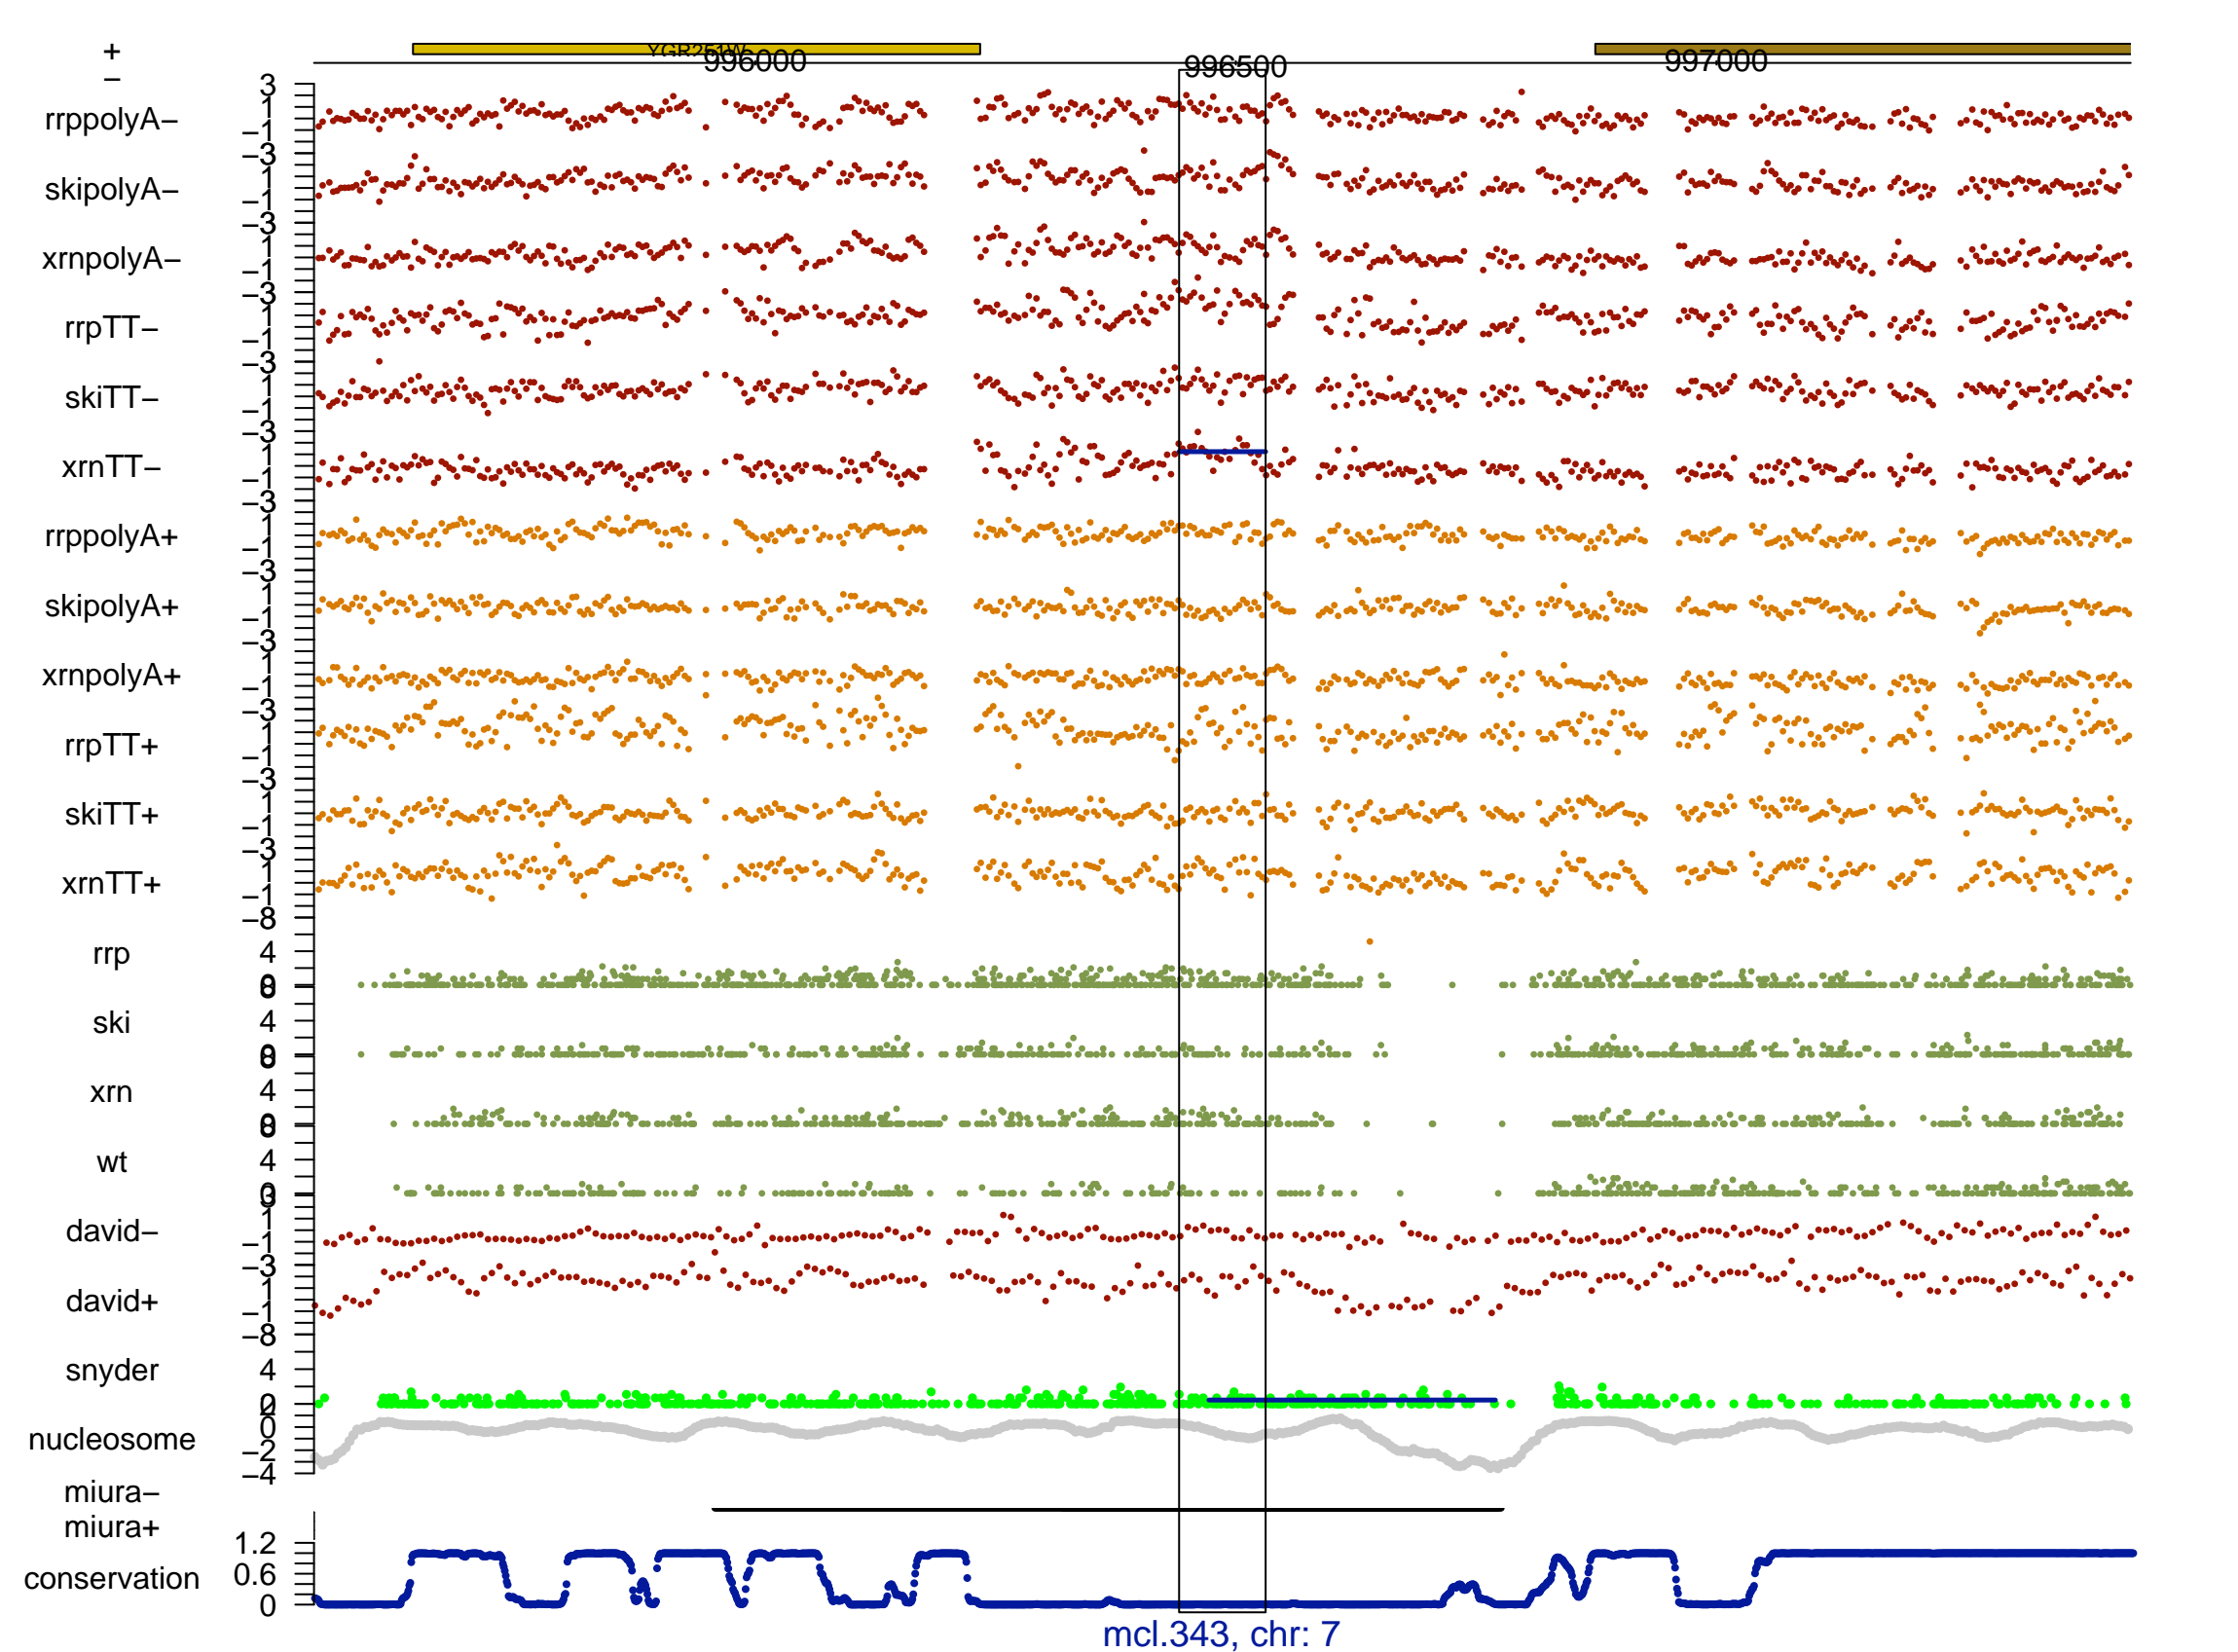



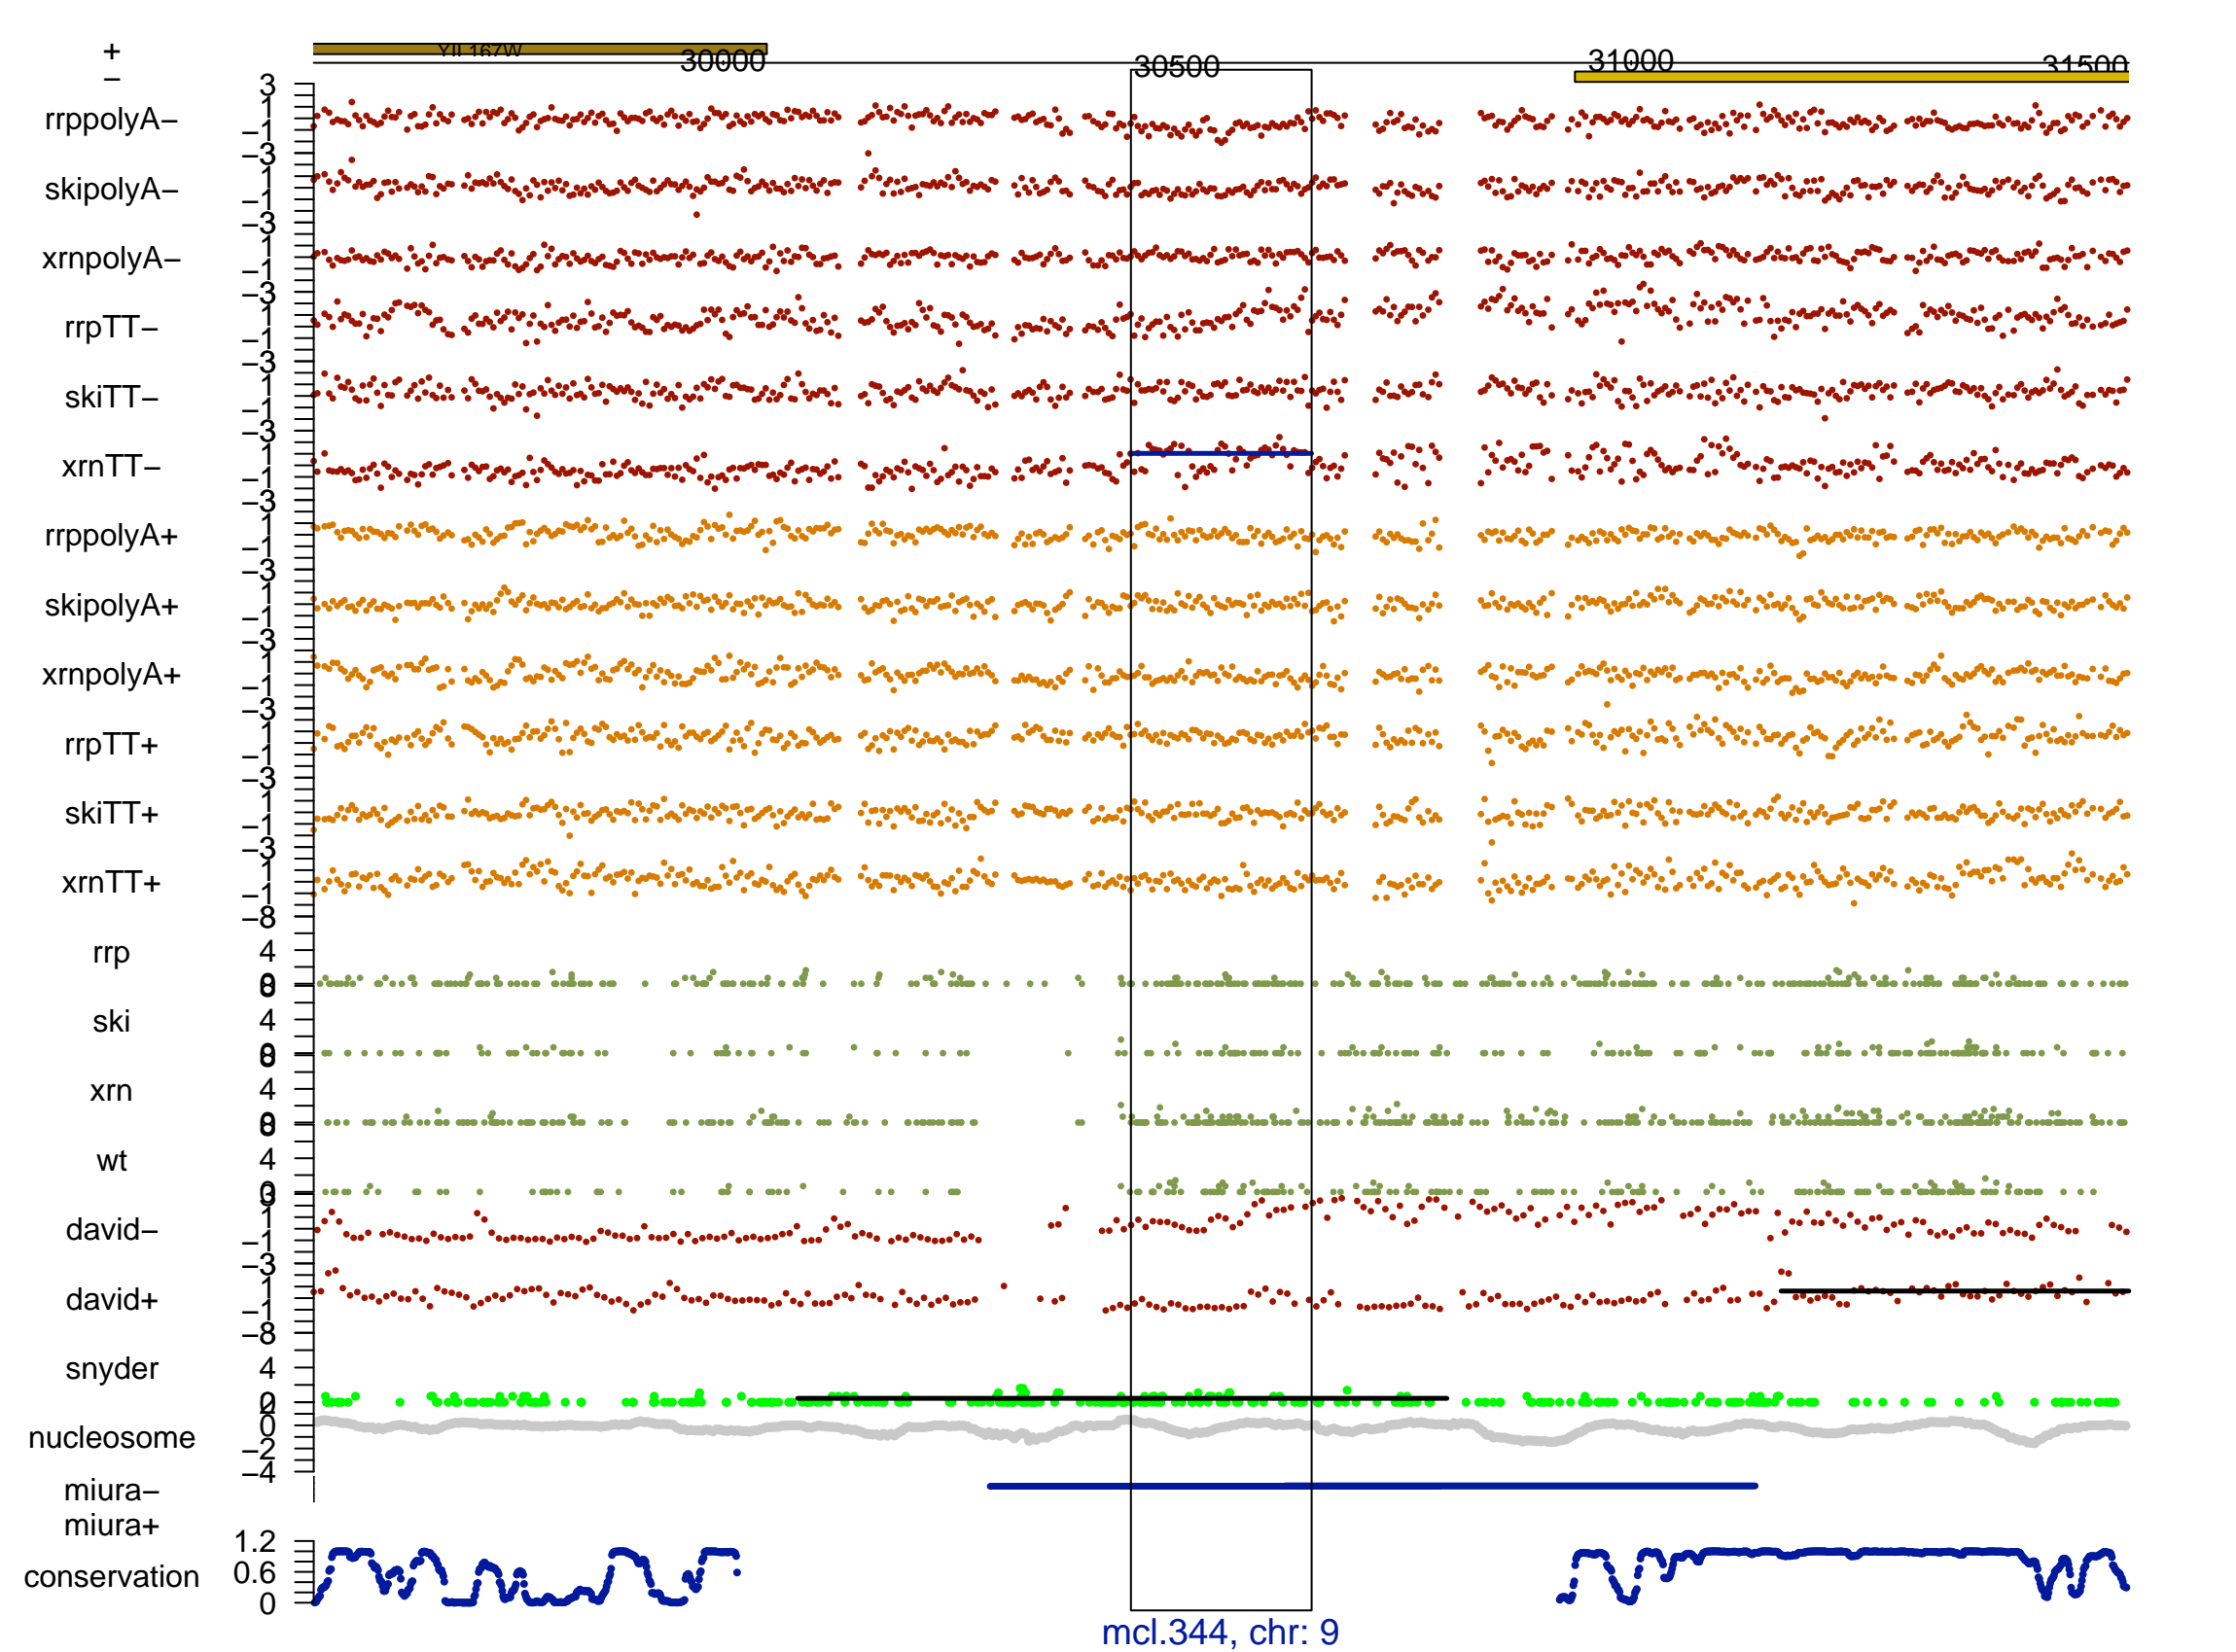

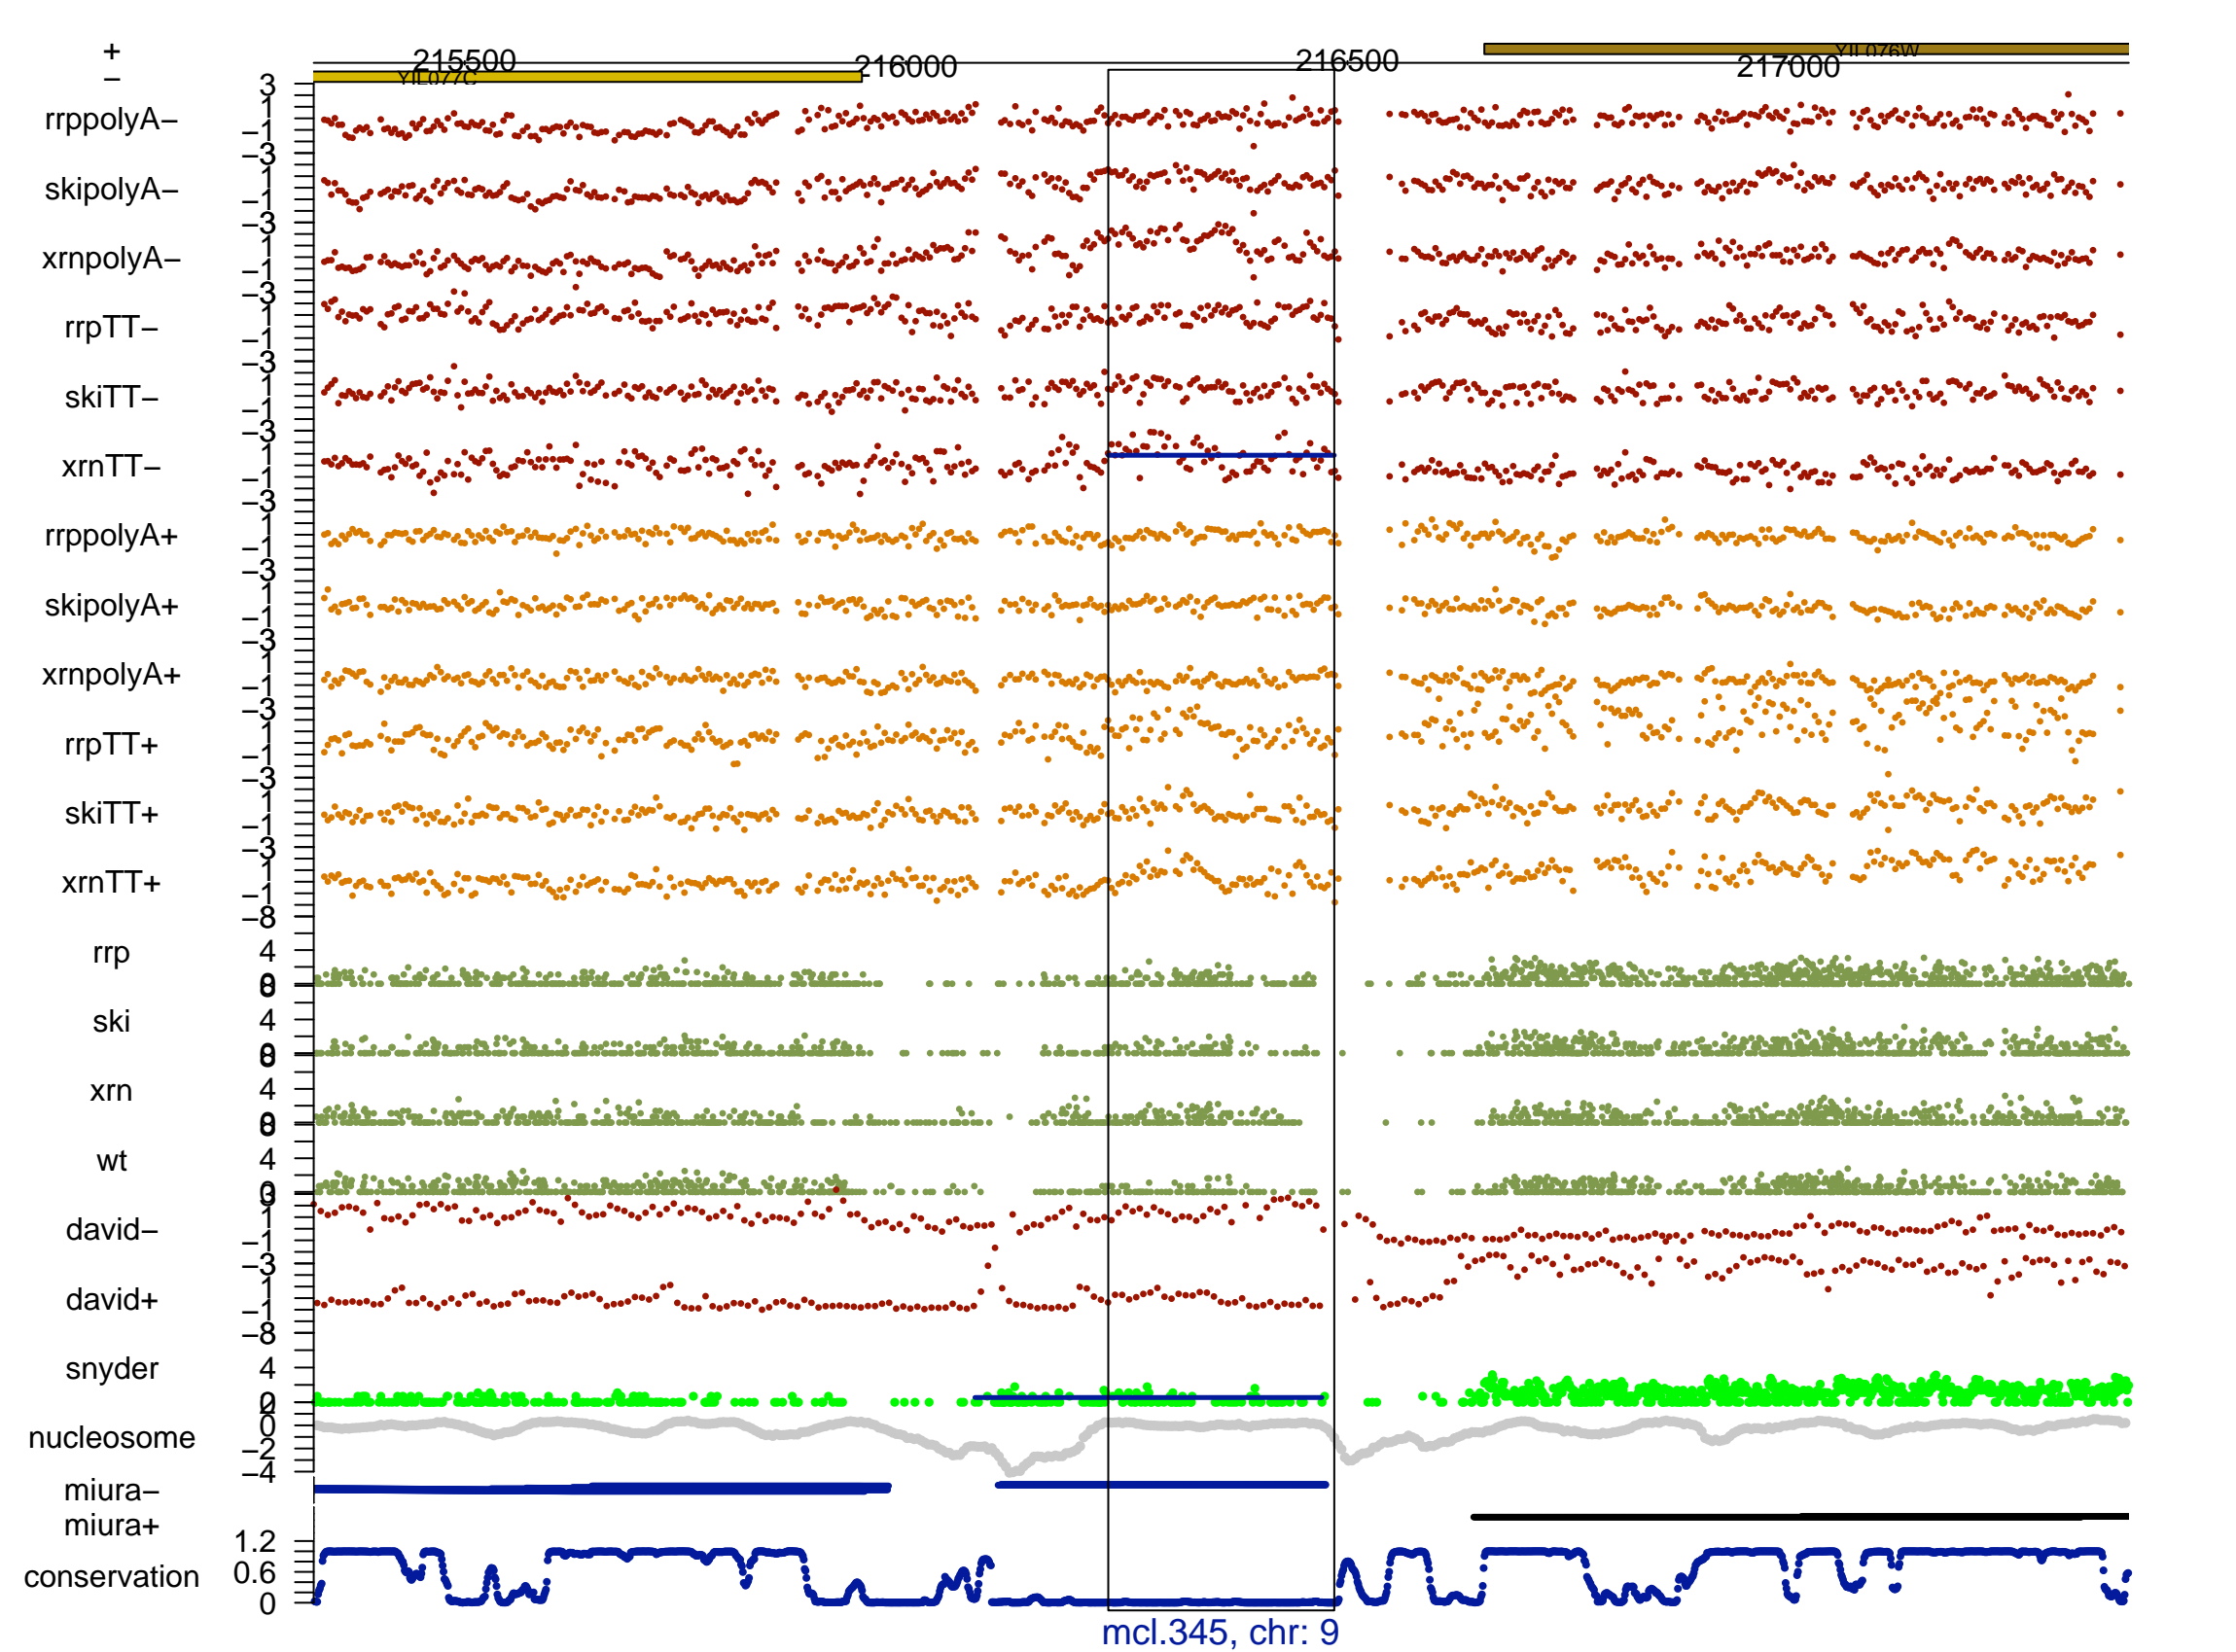



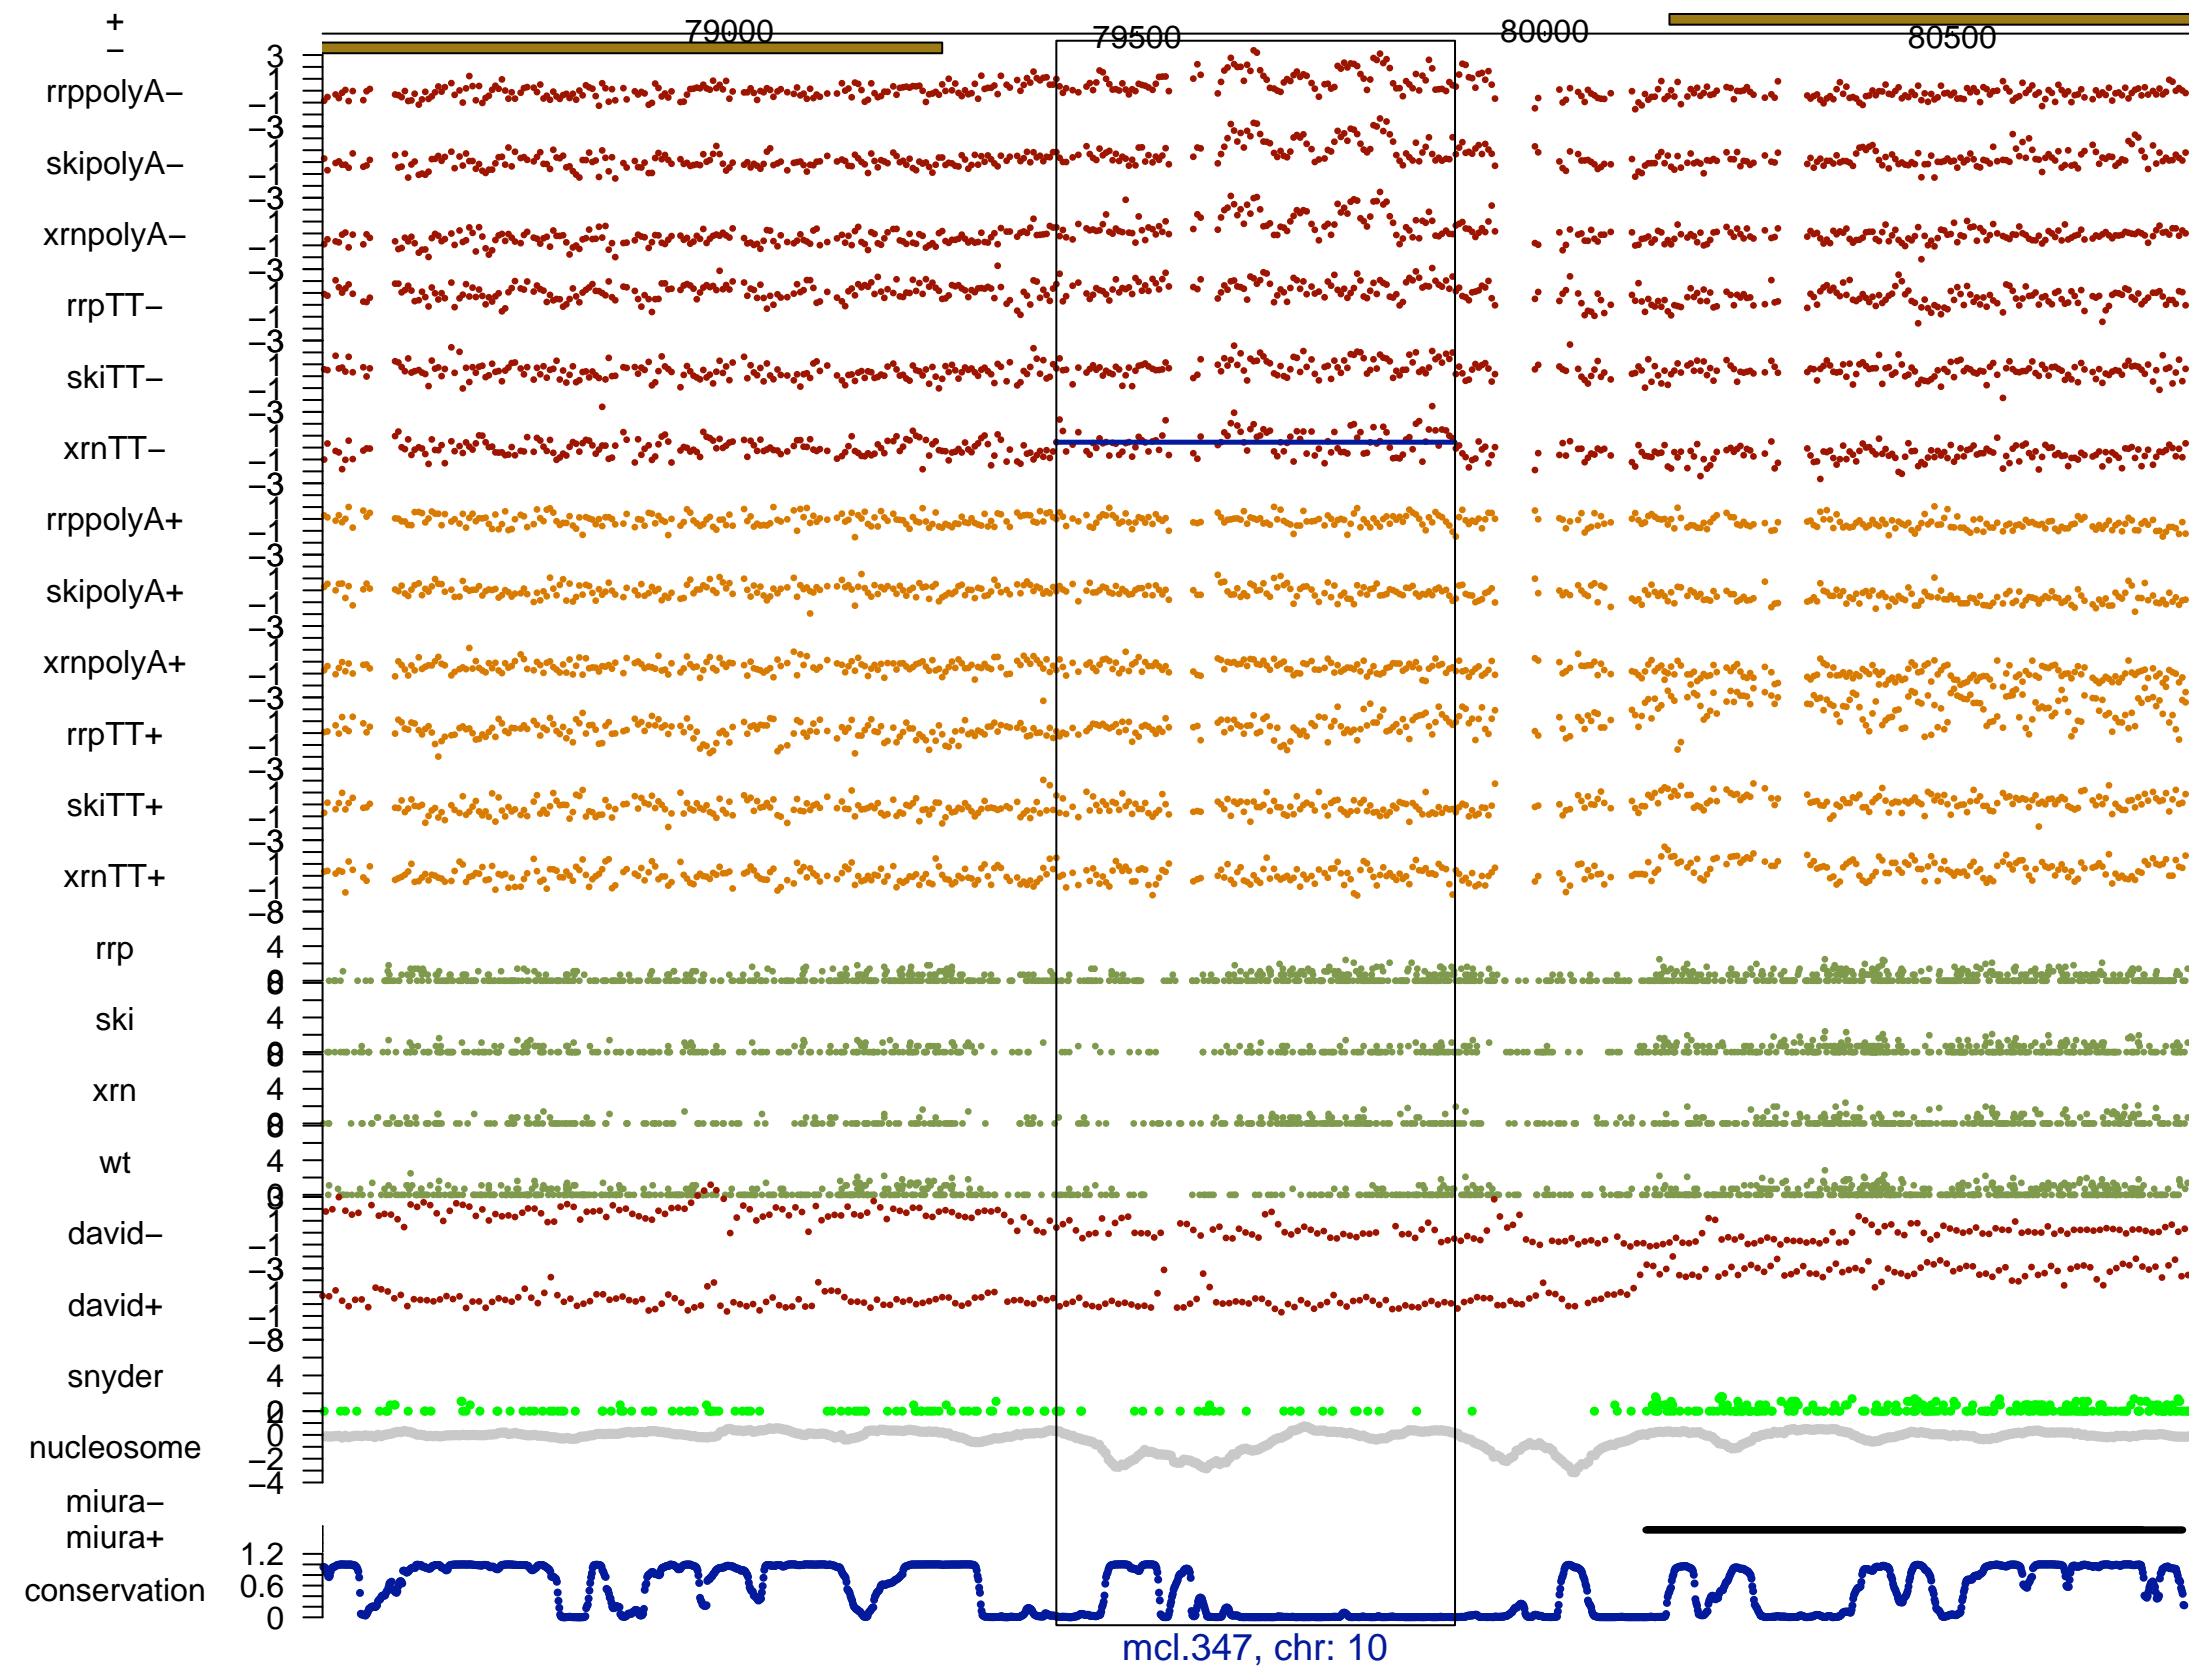



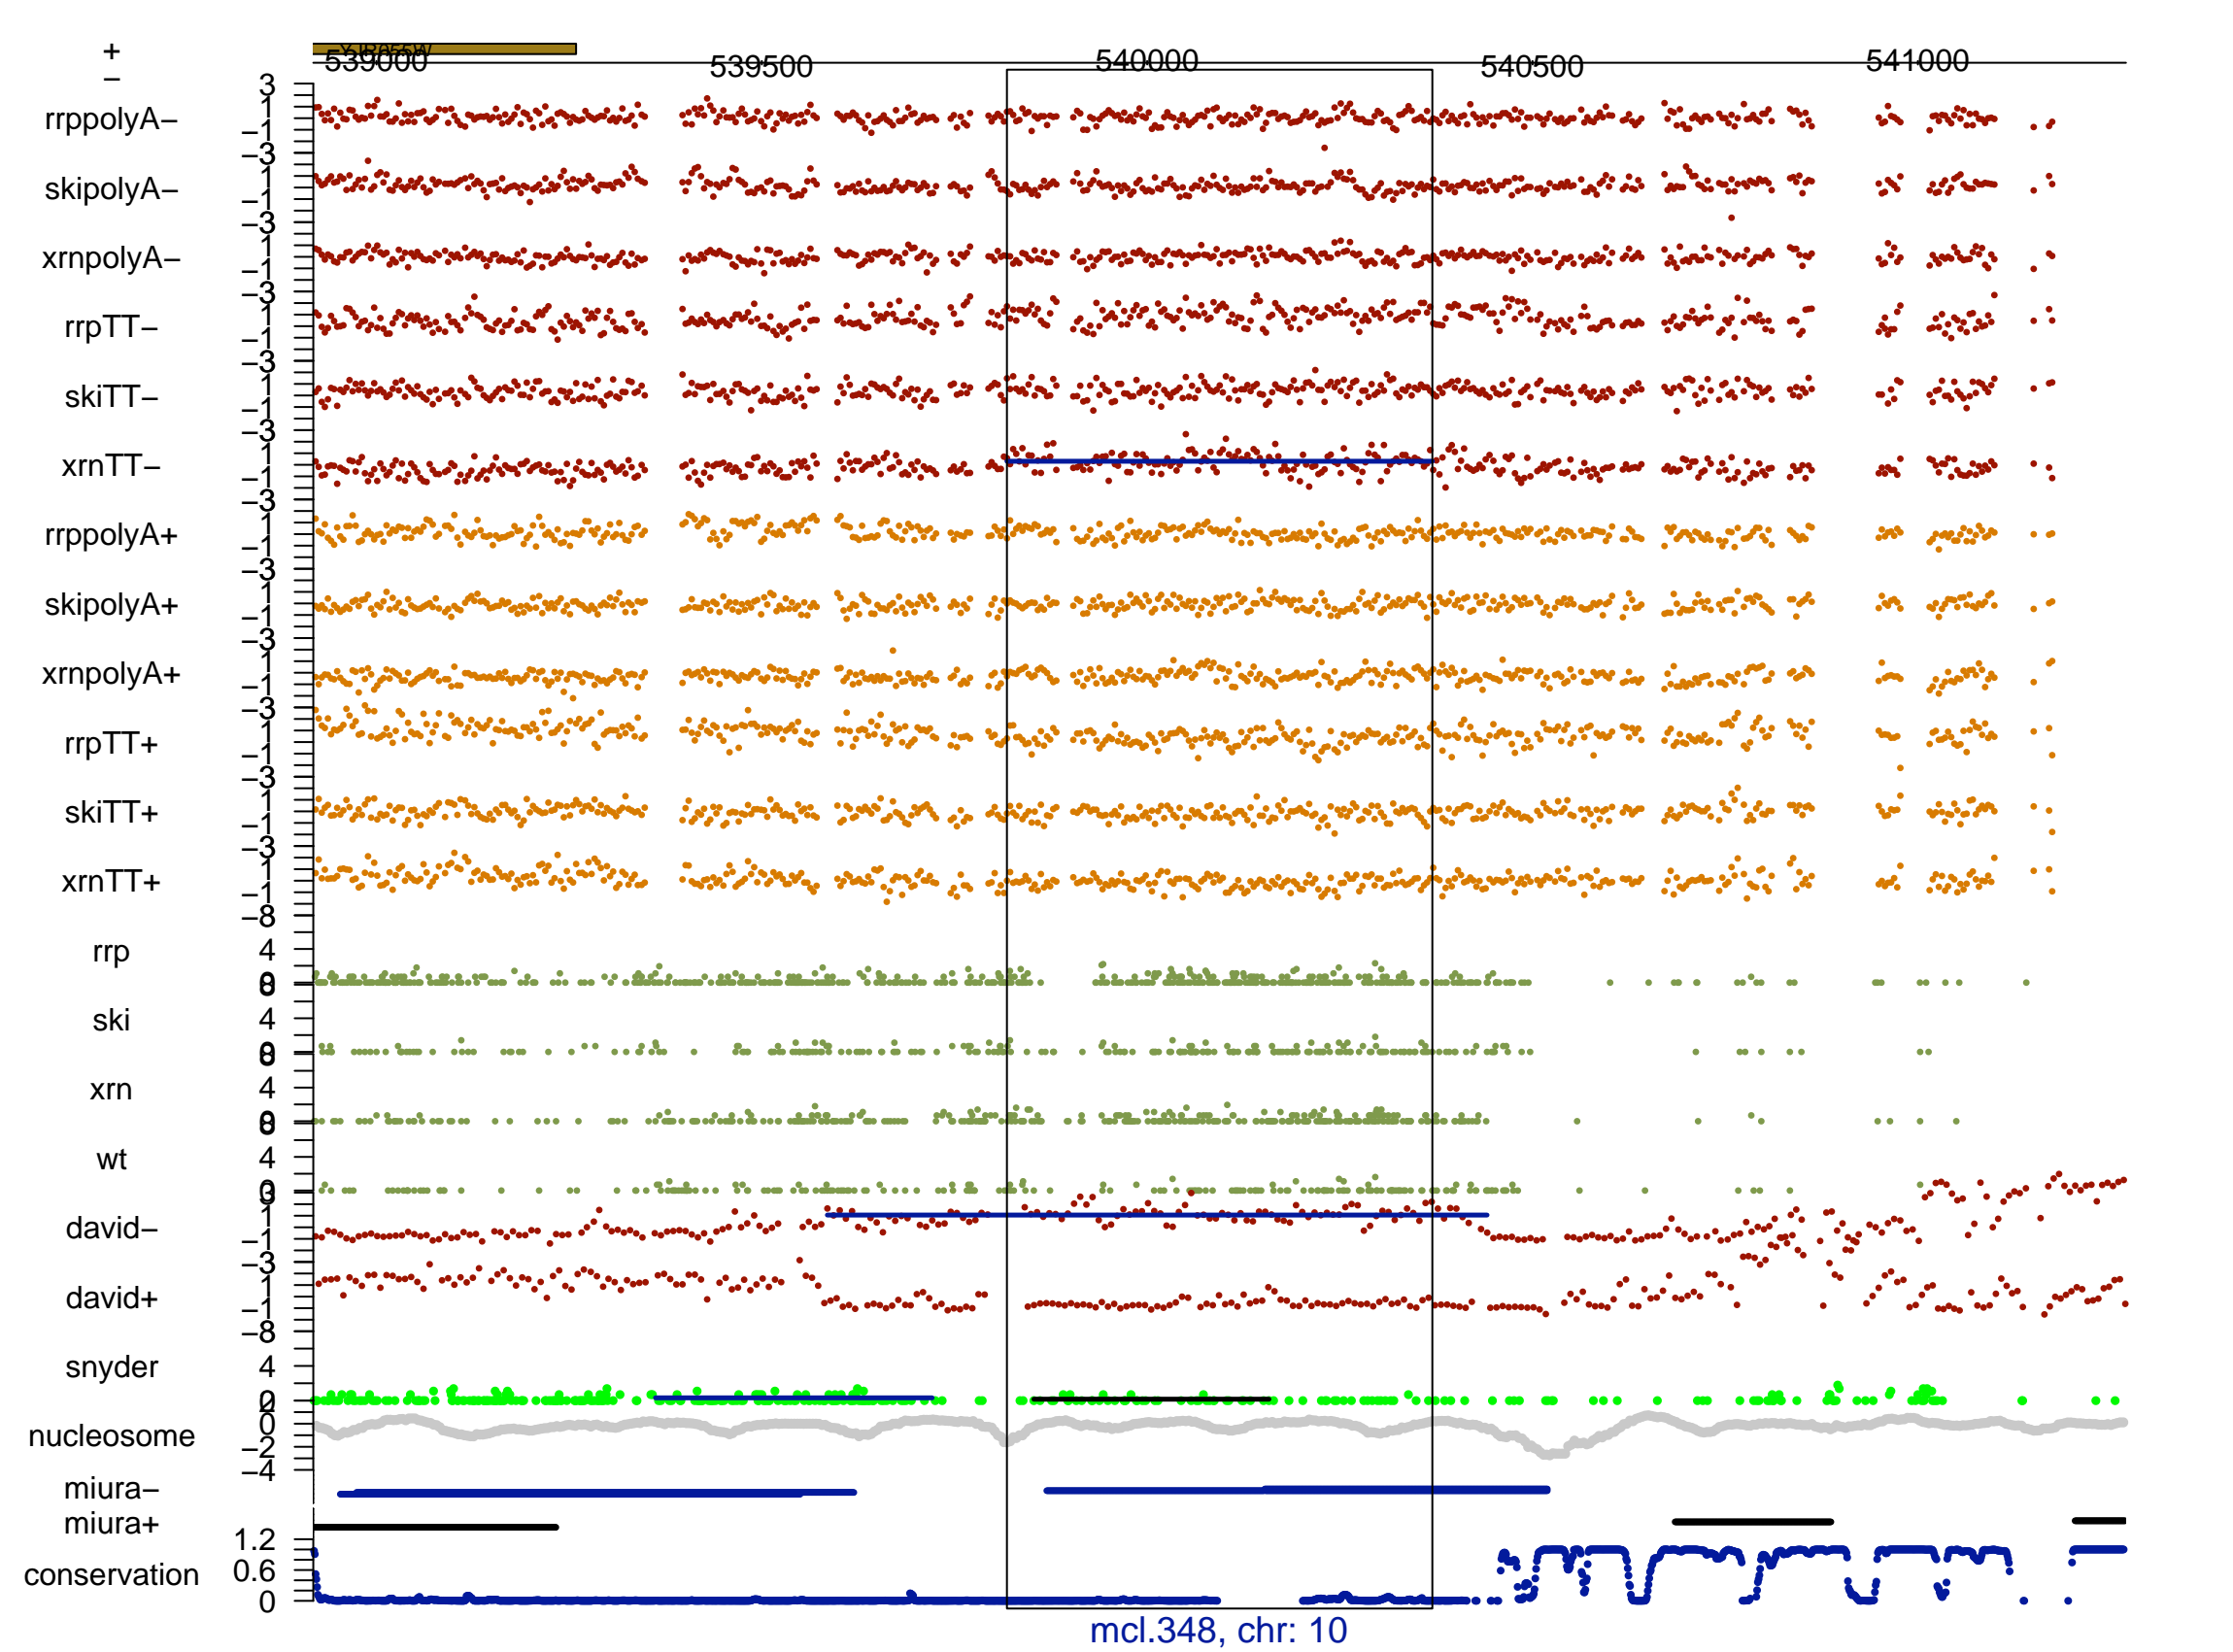

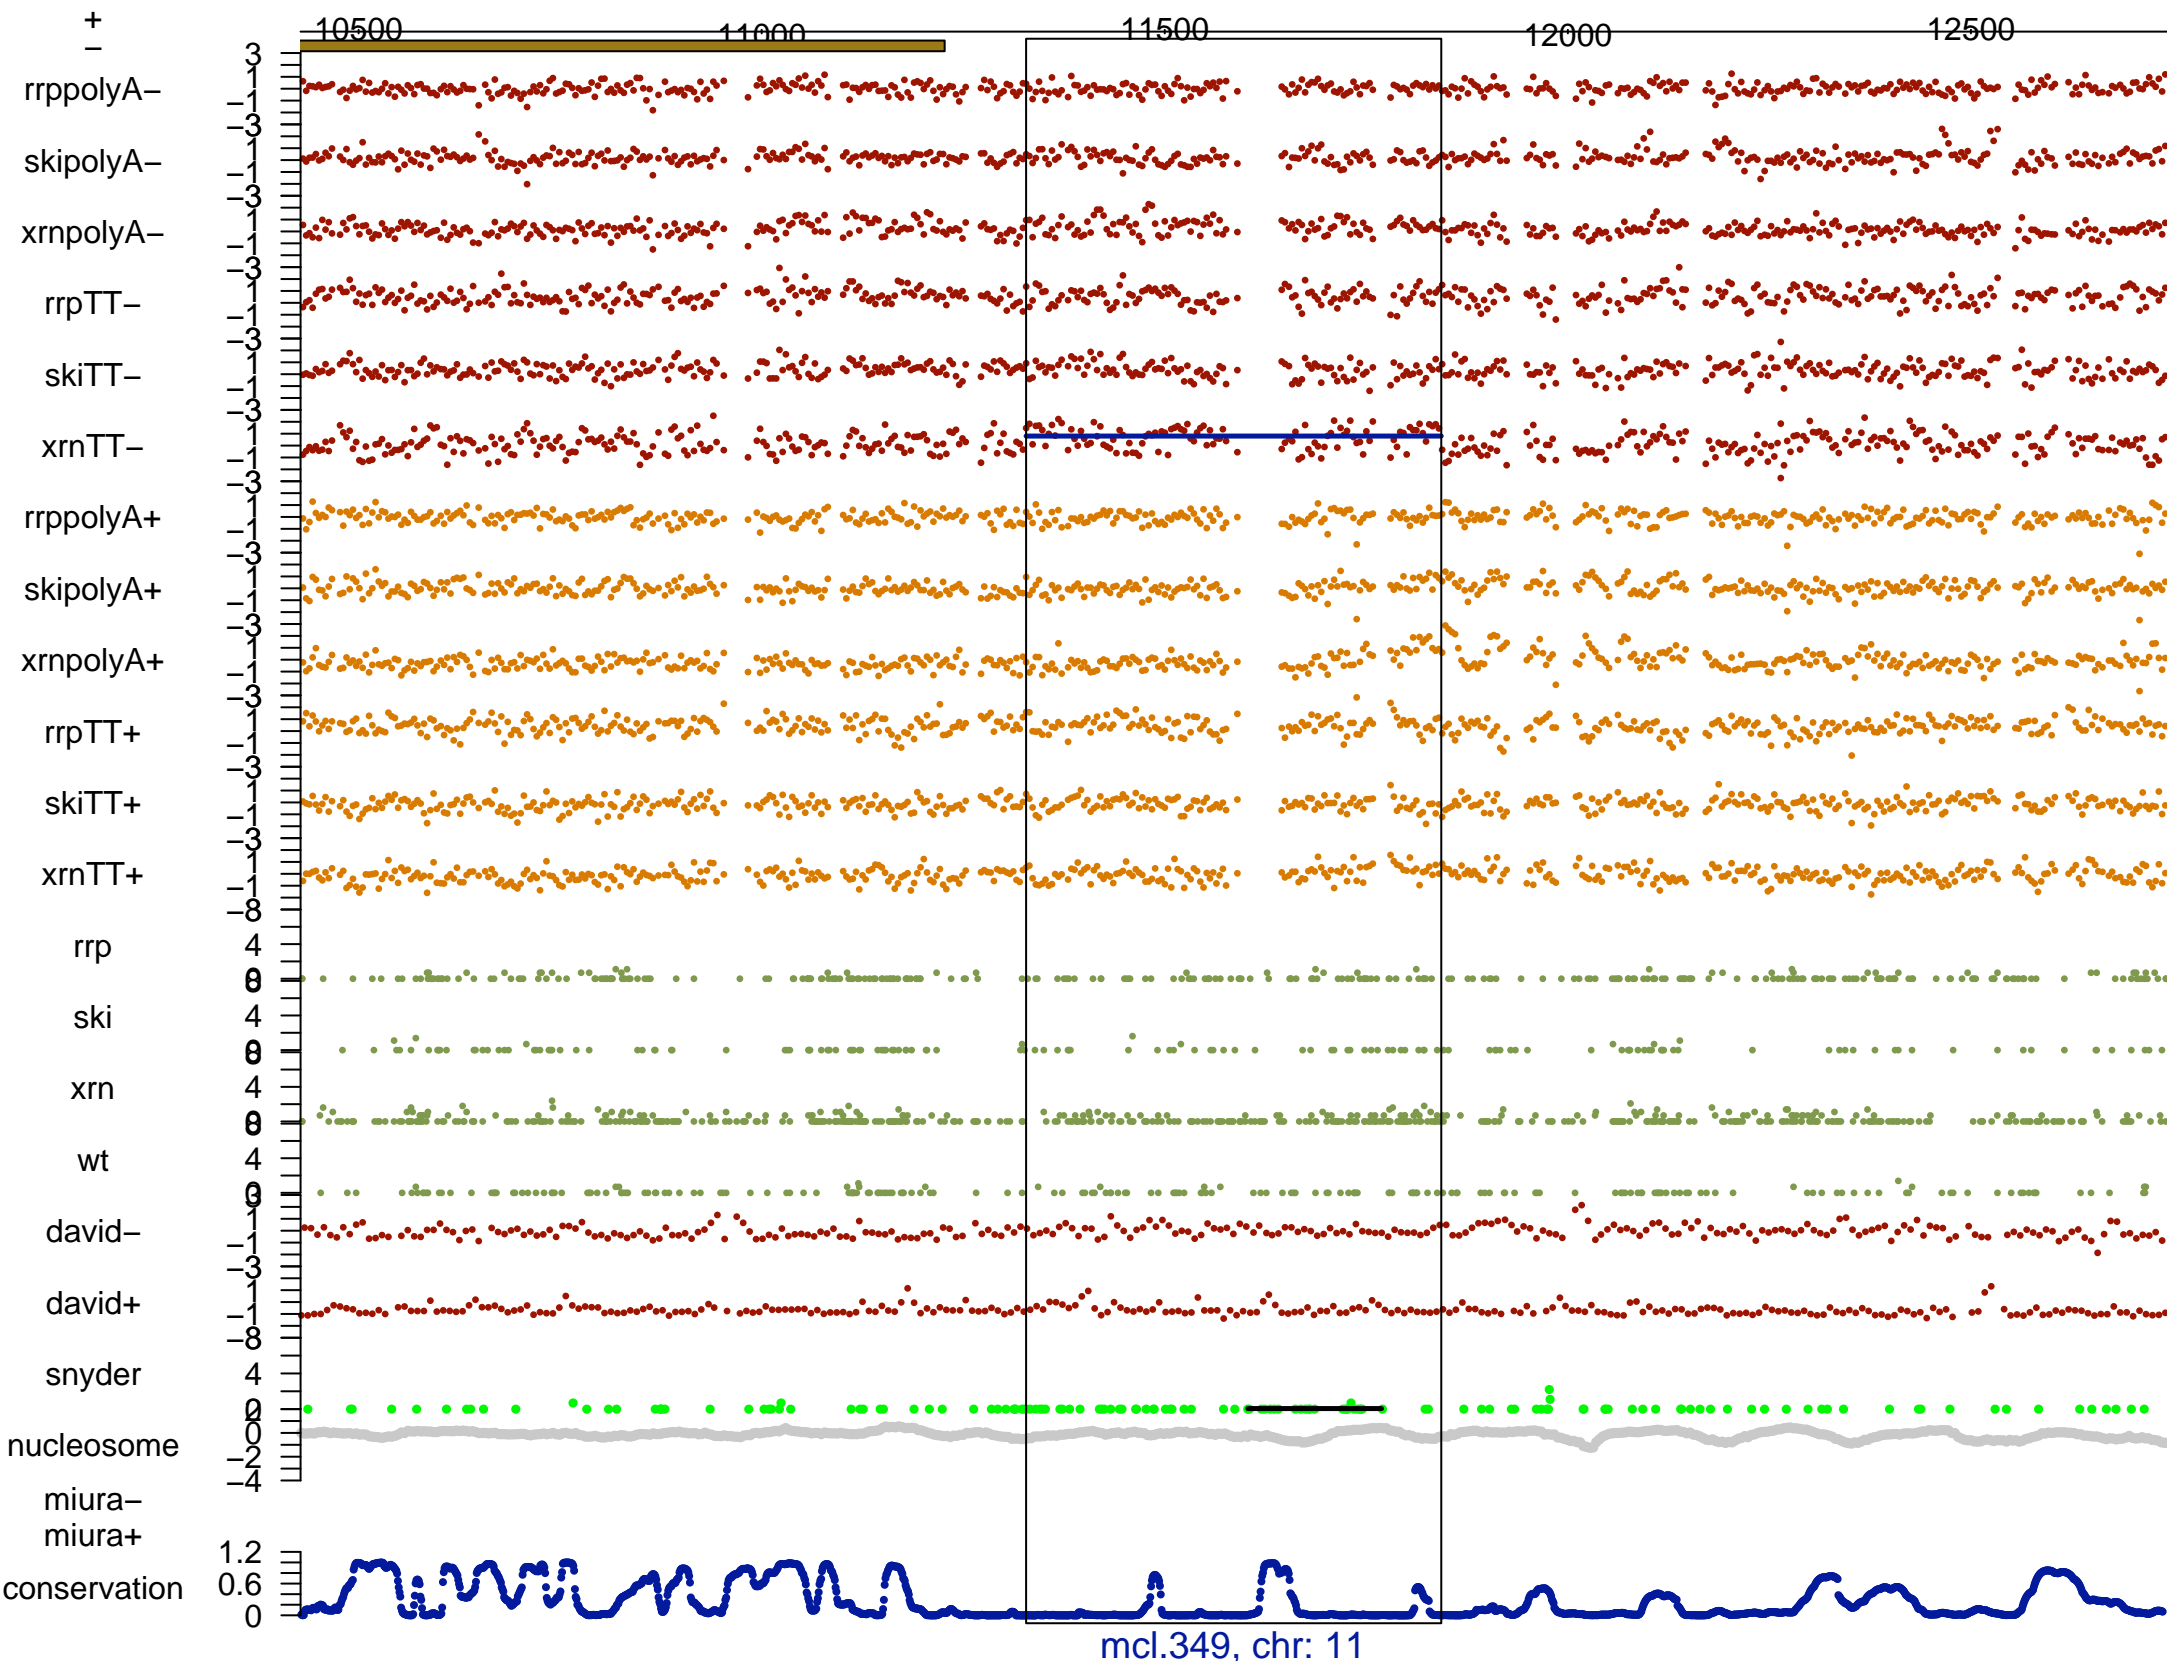

mcl.349, chr: 11

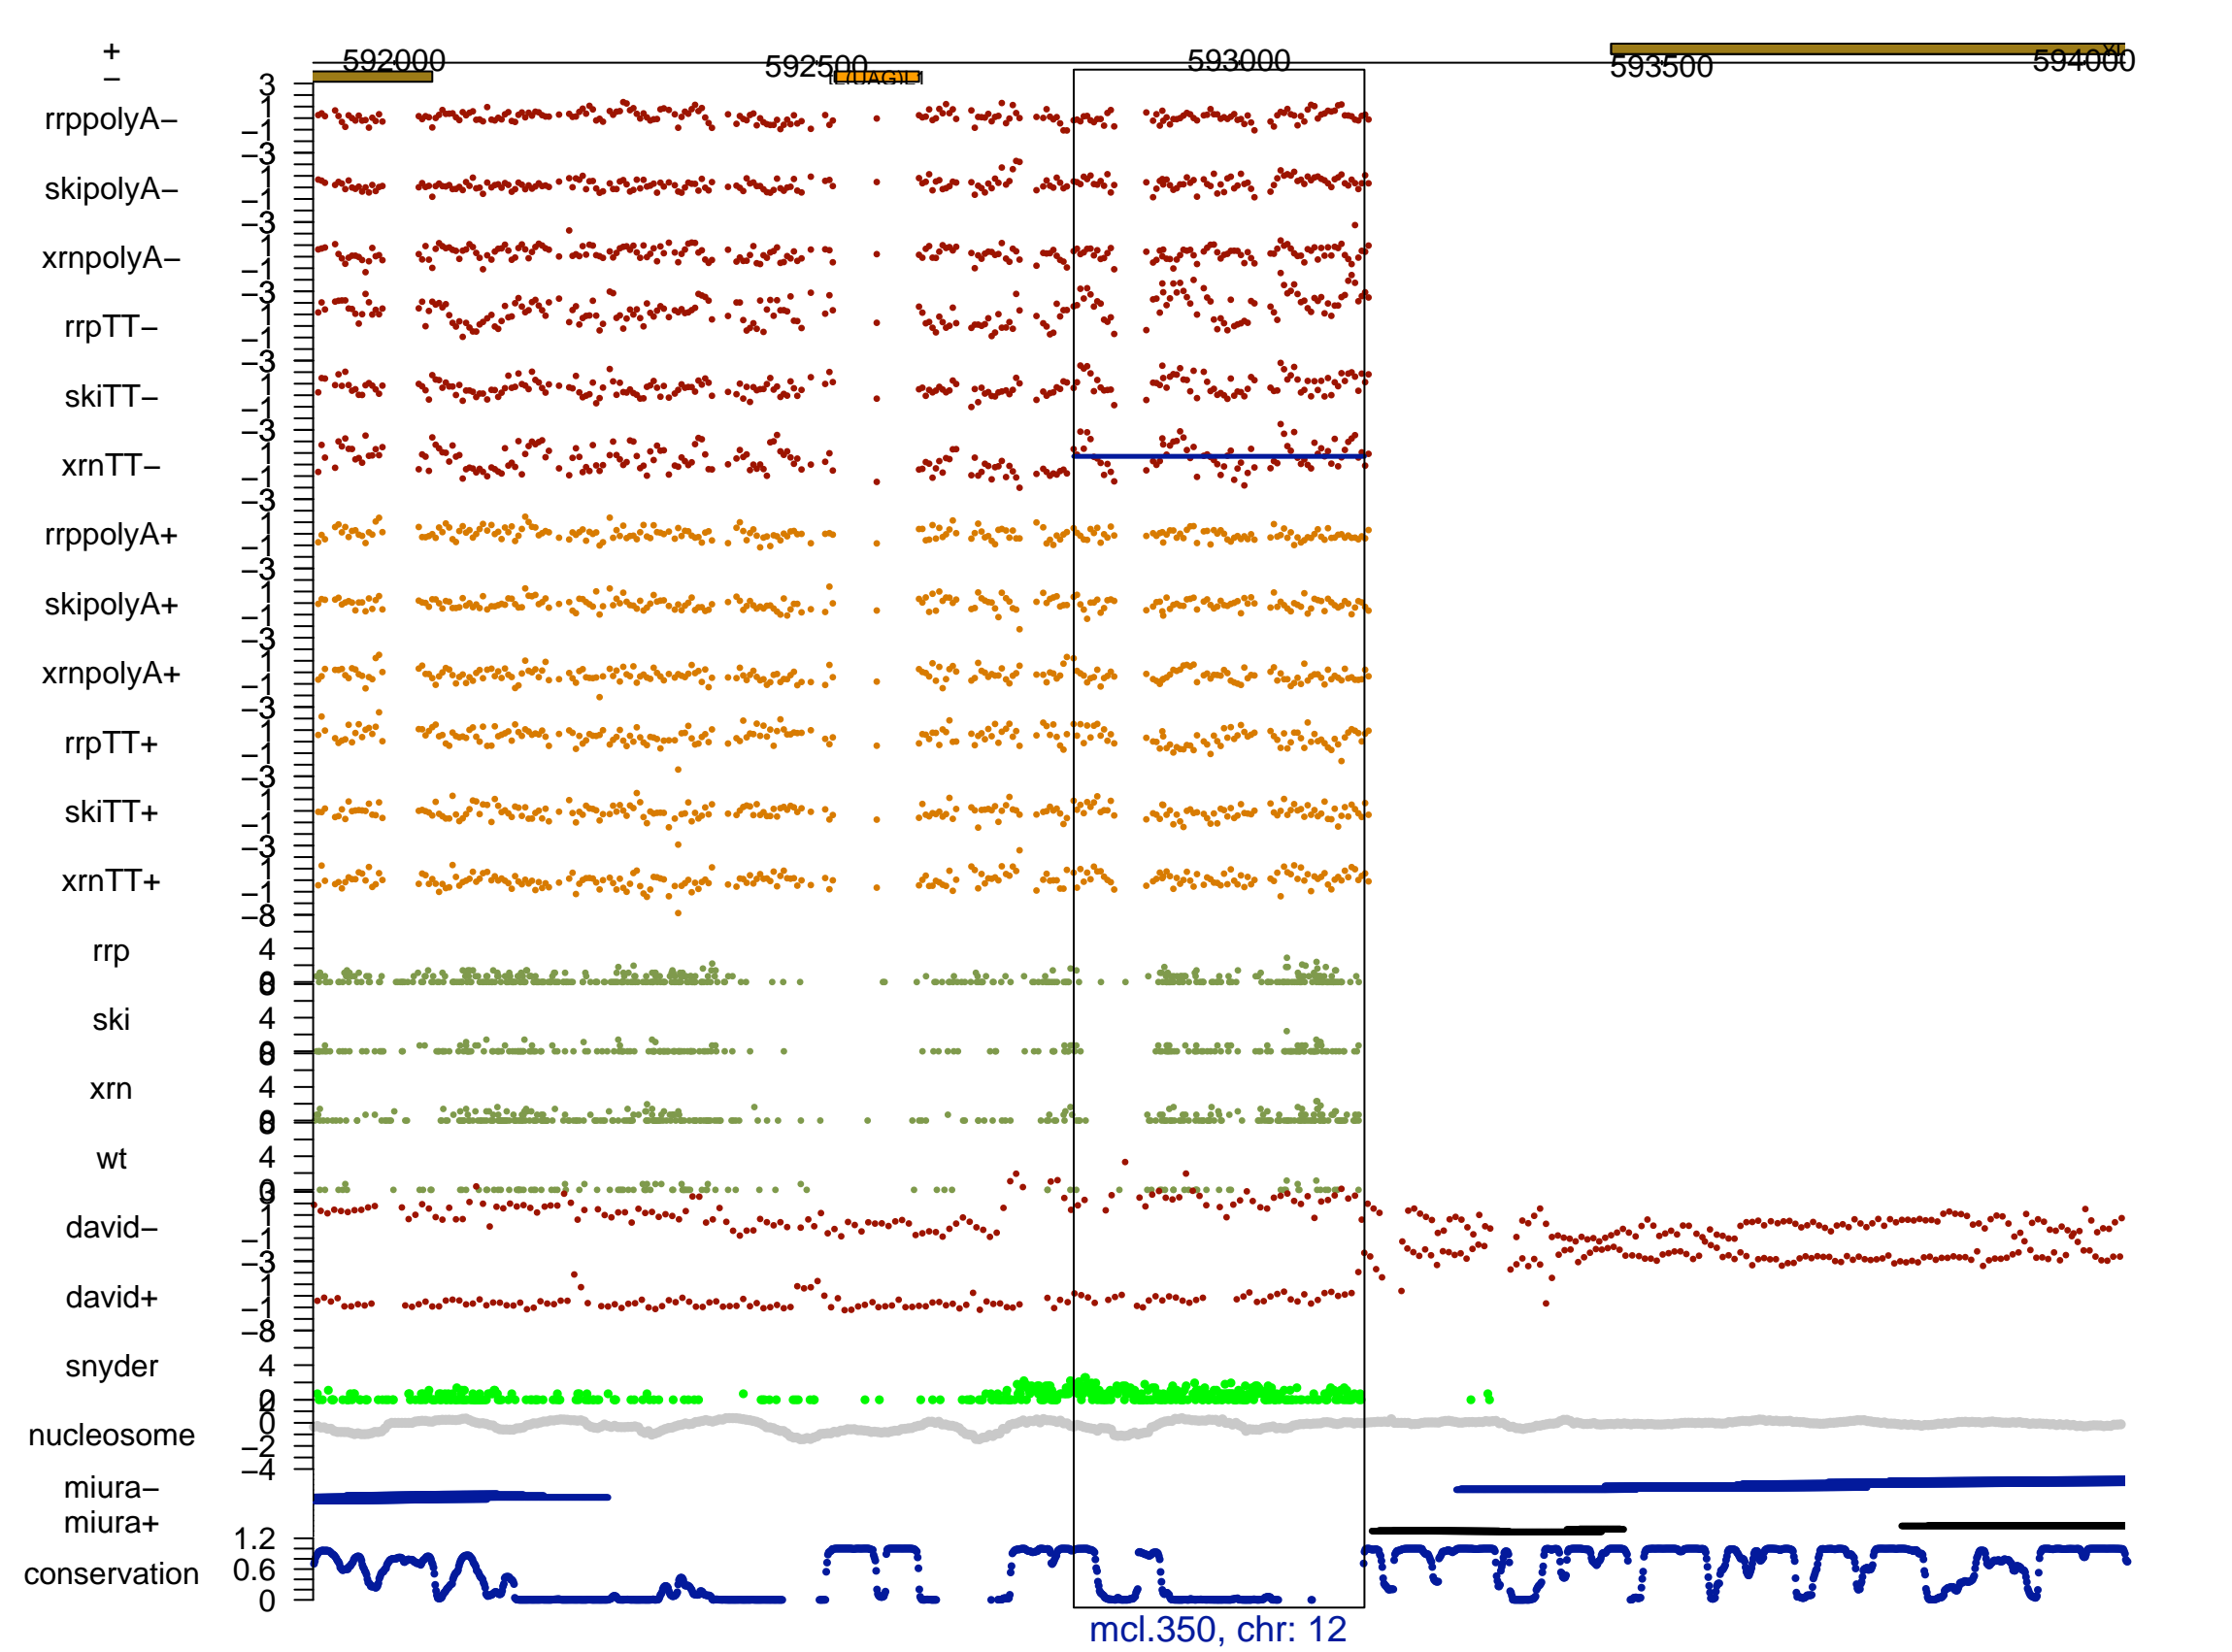

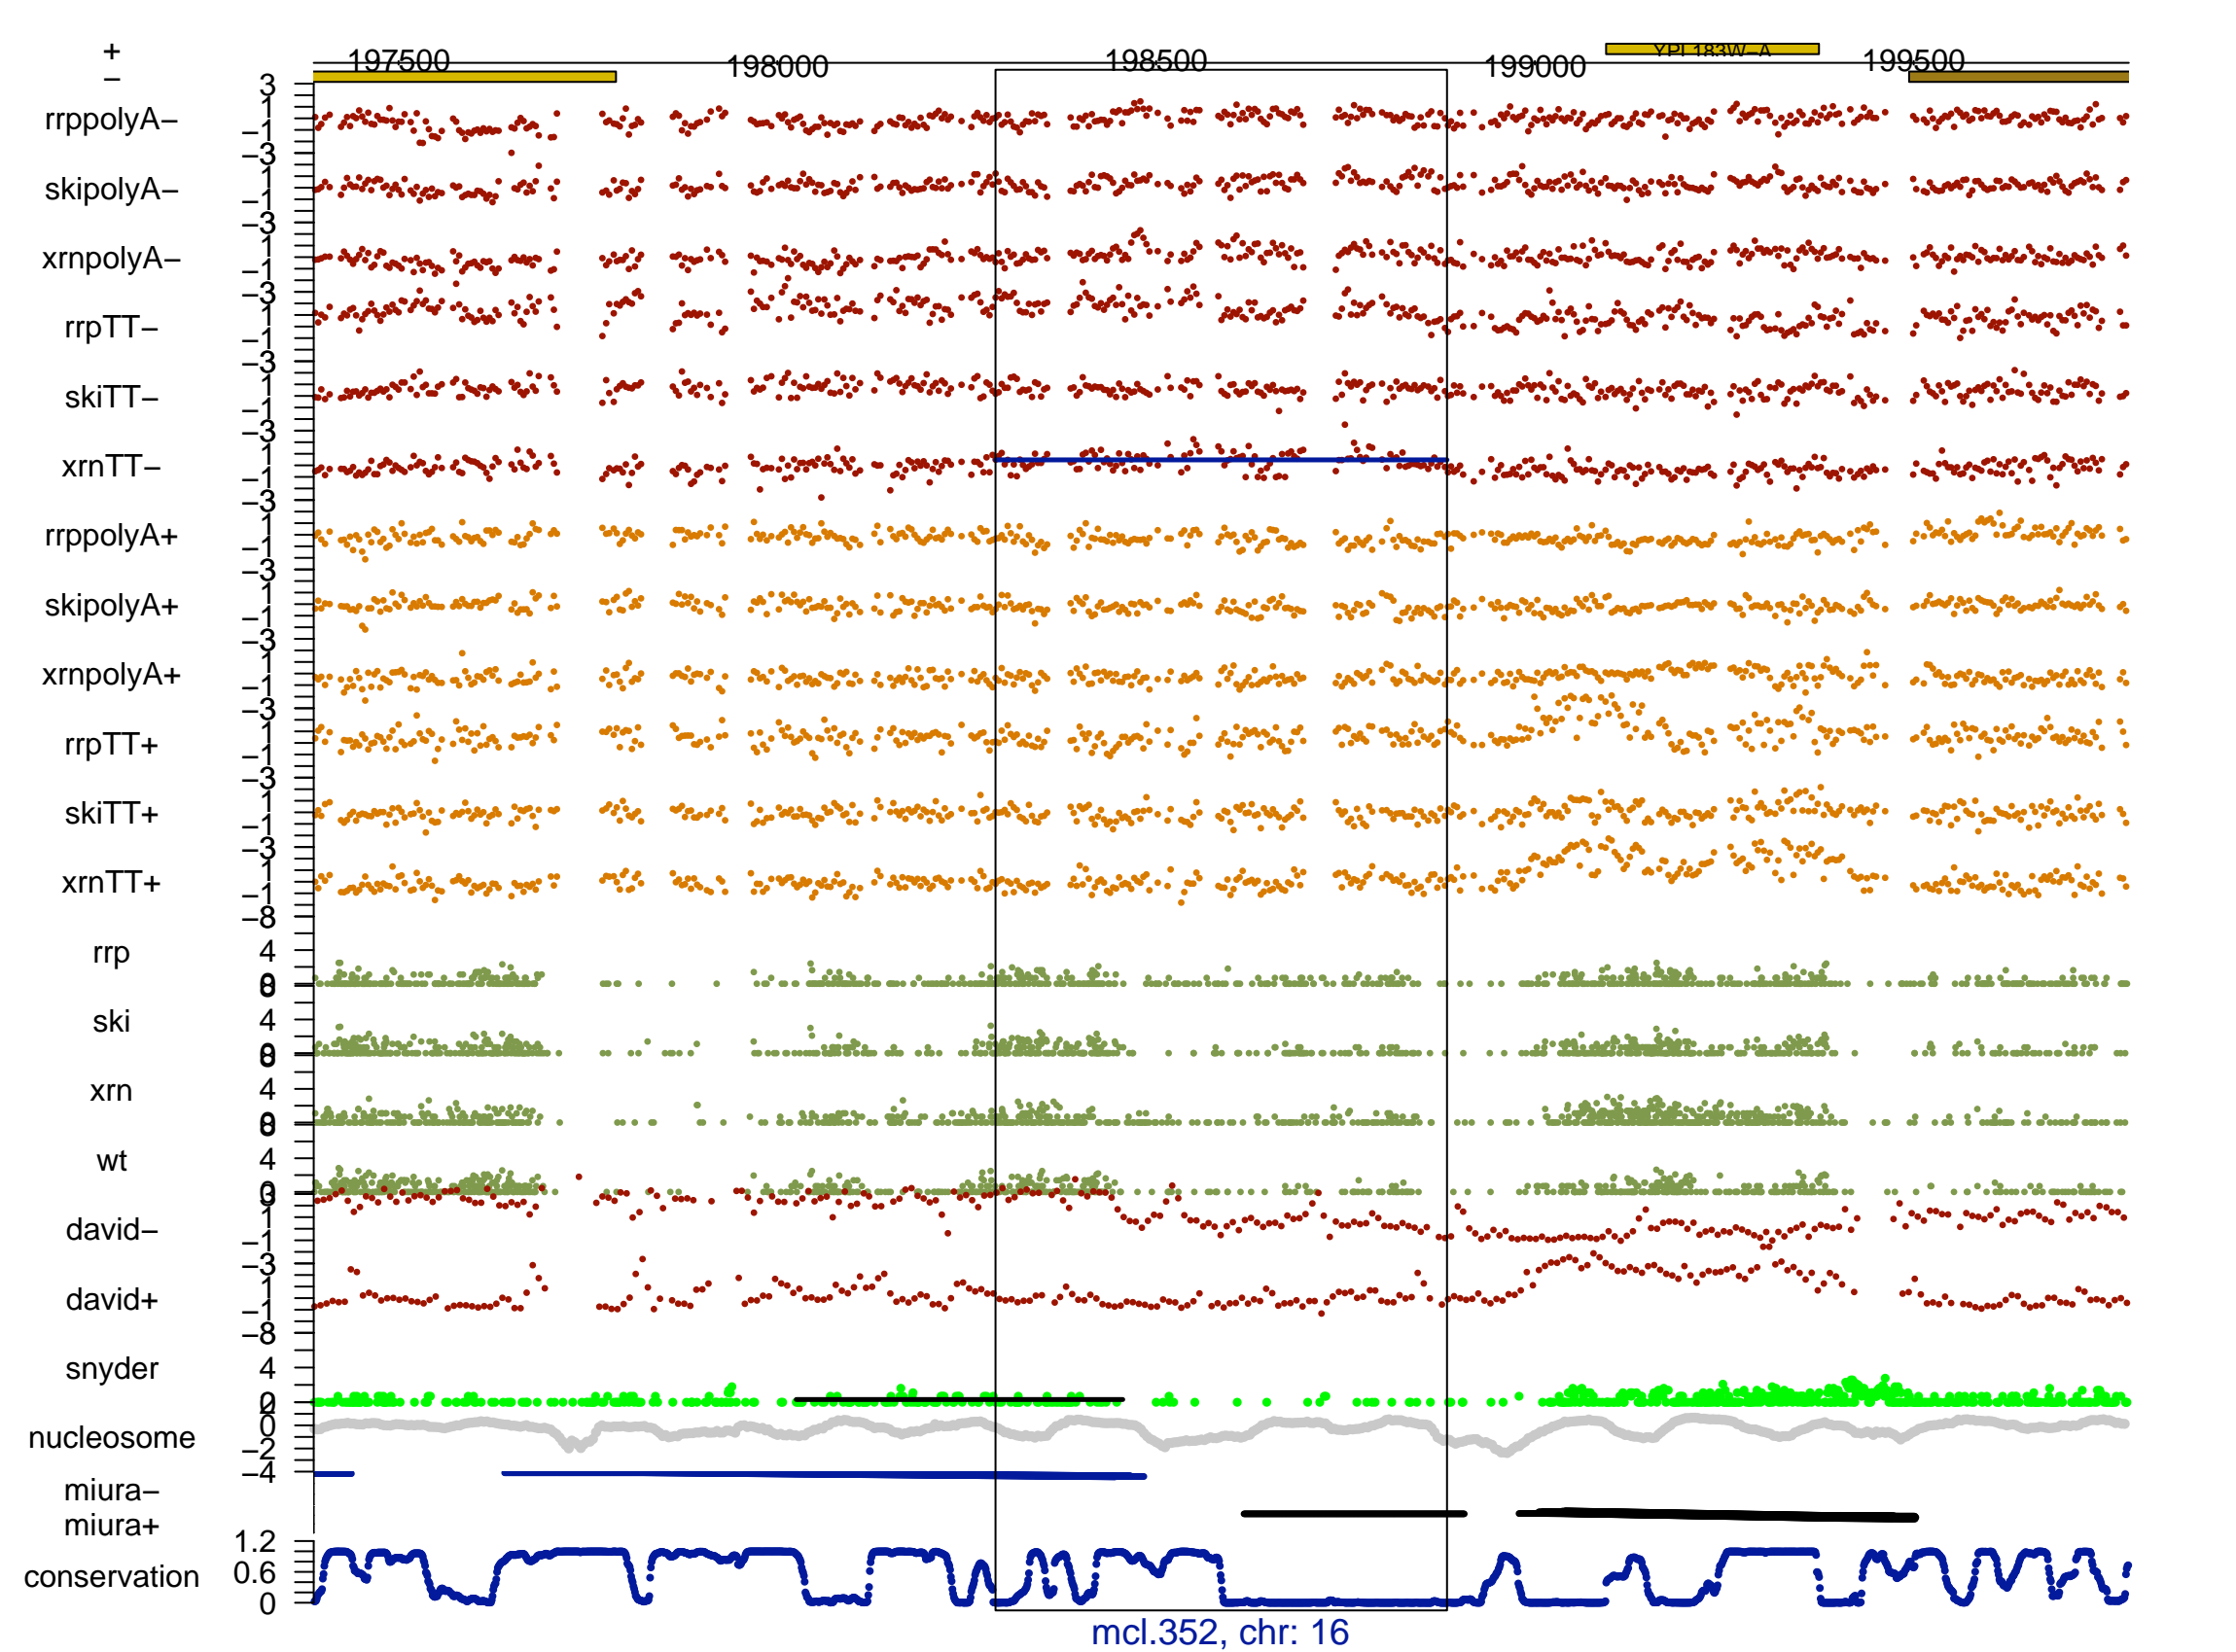



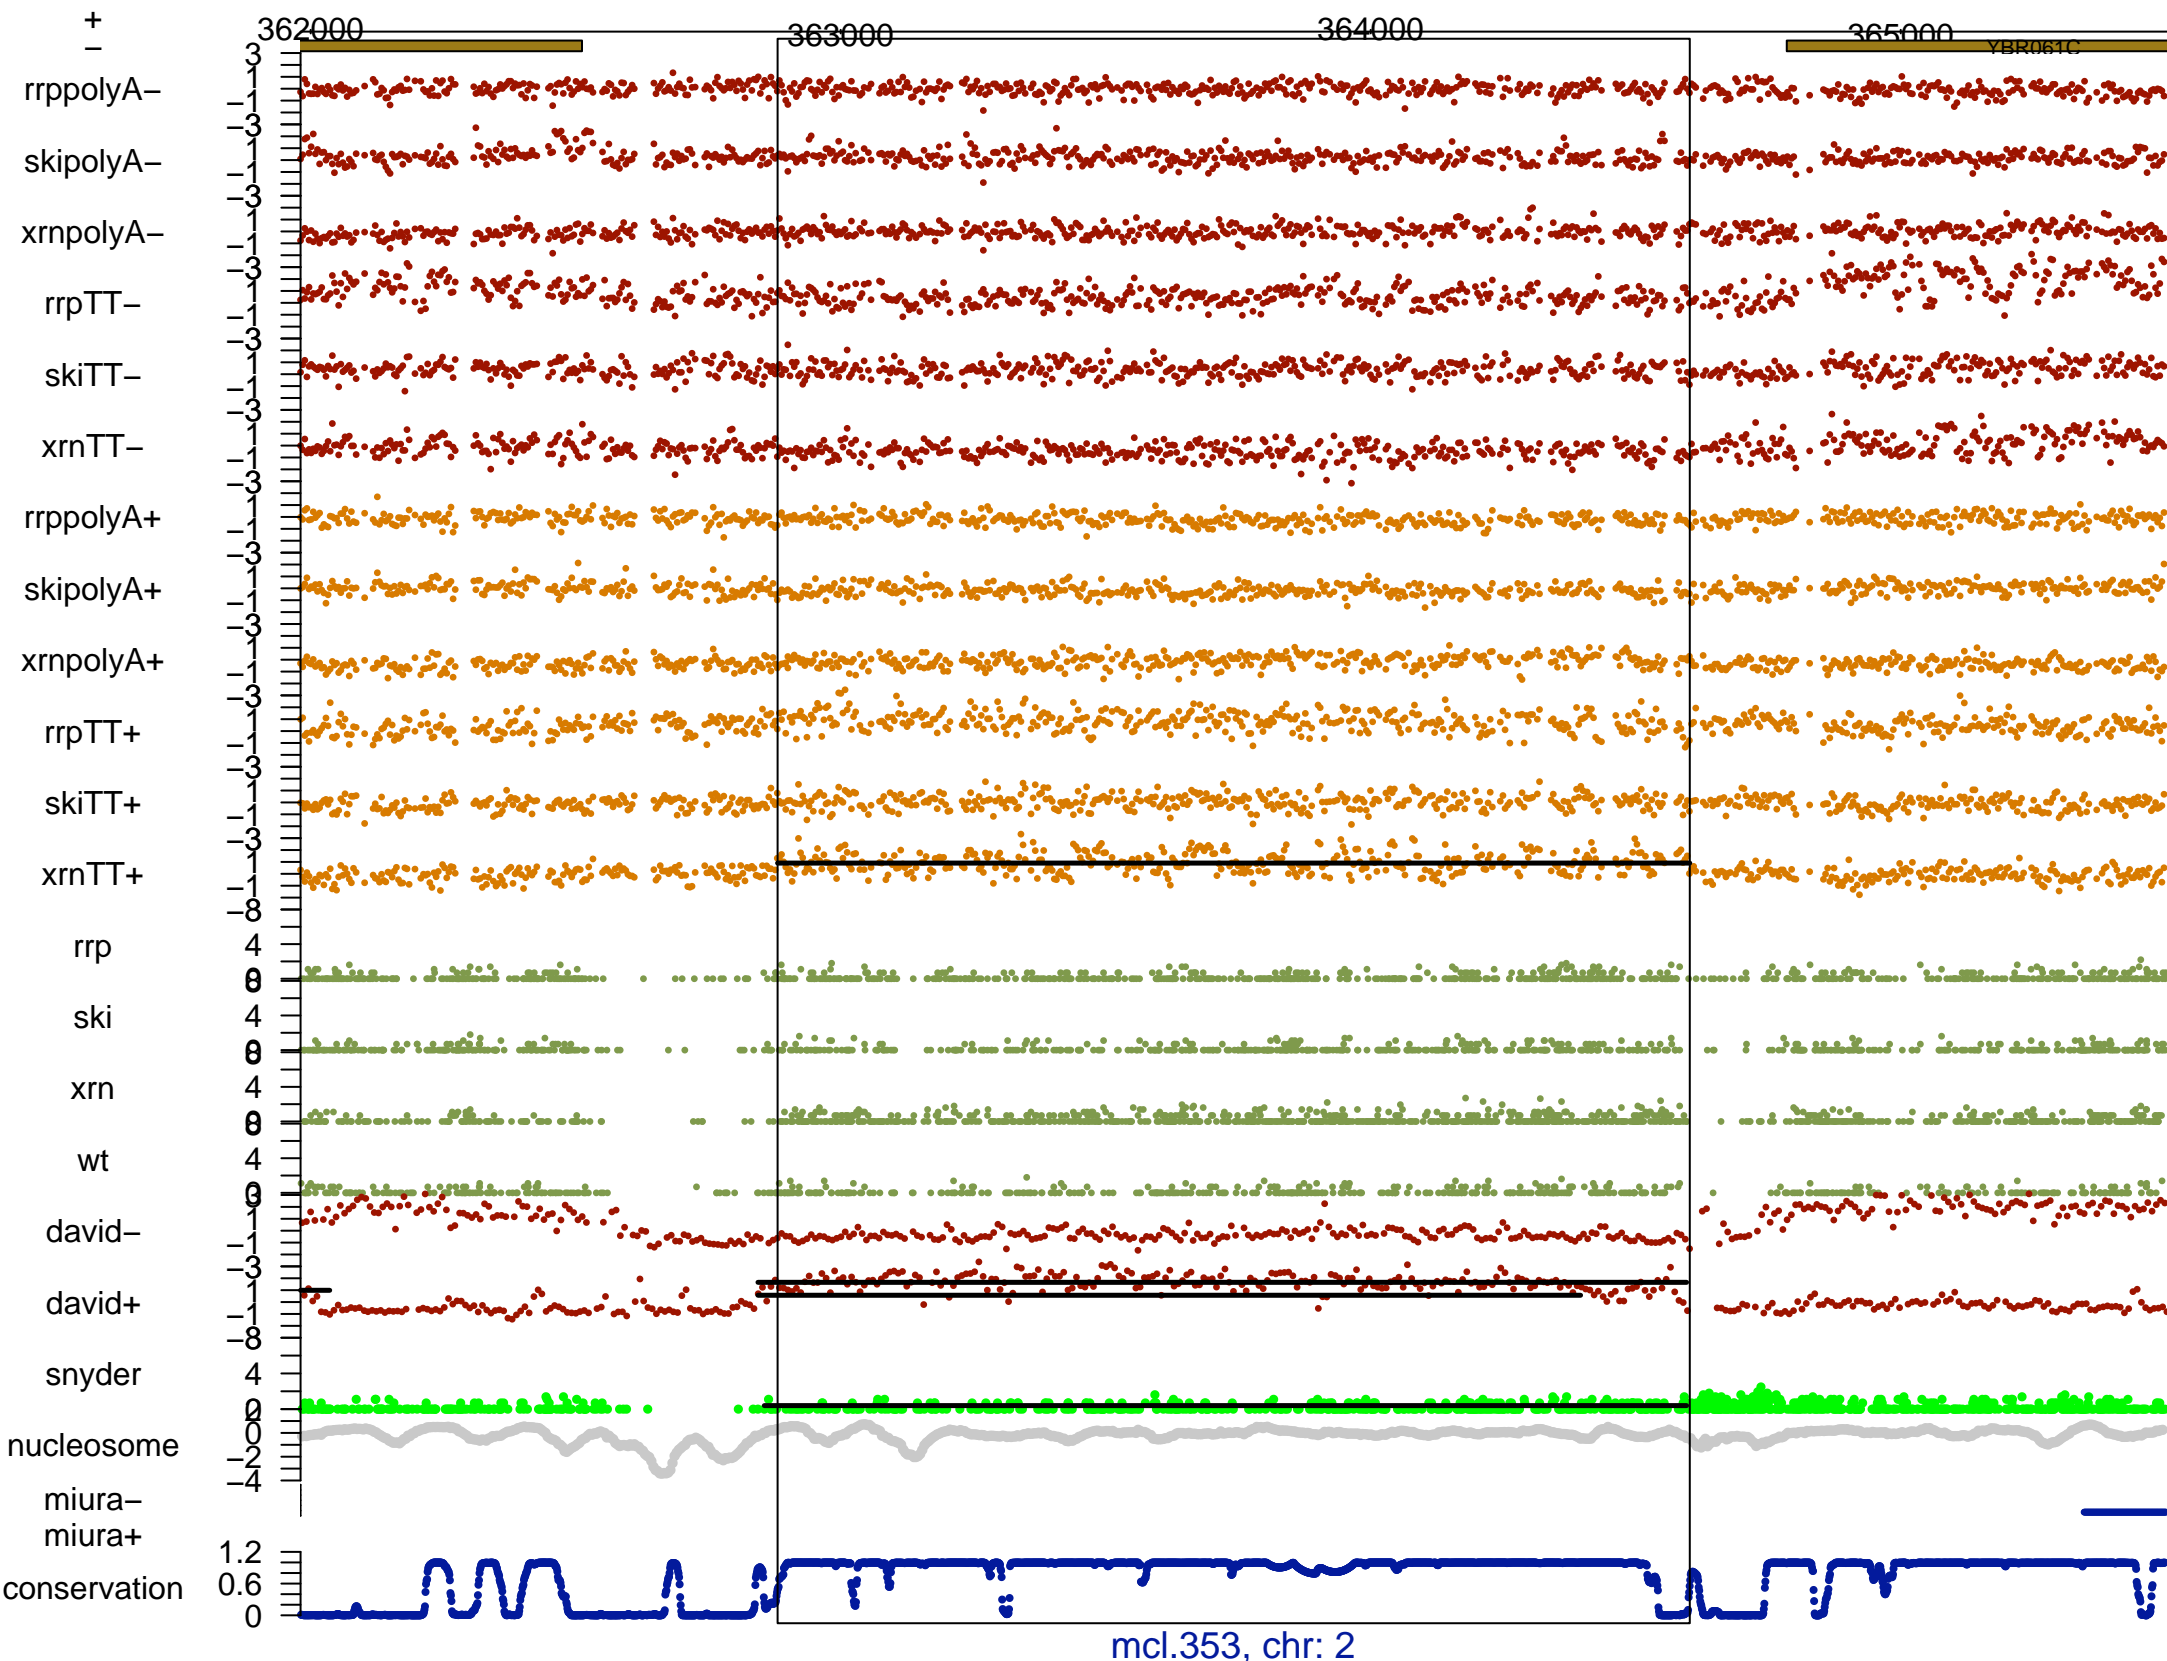

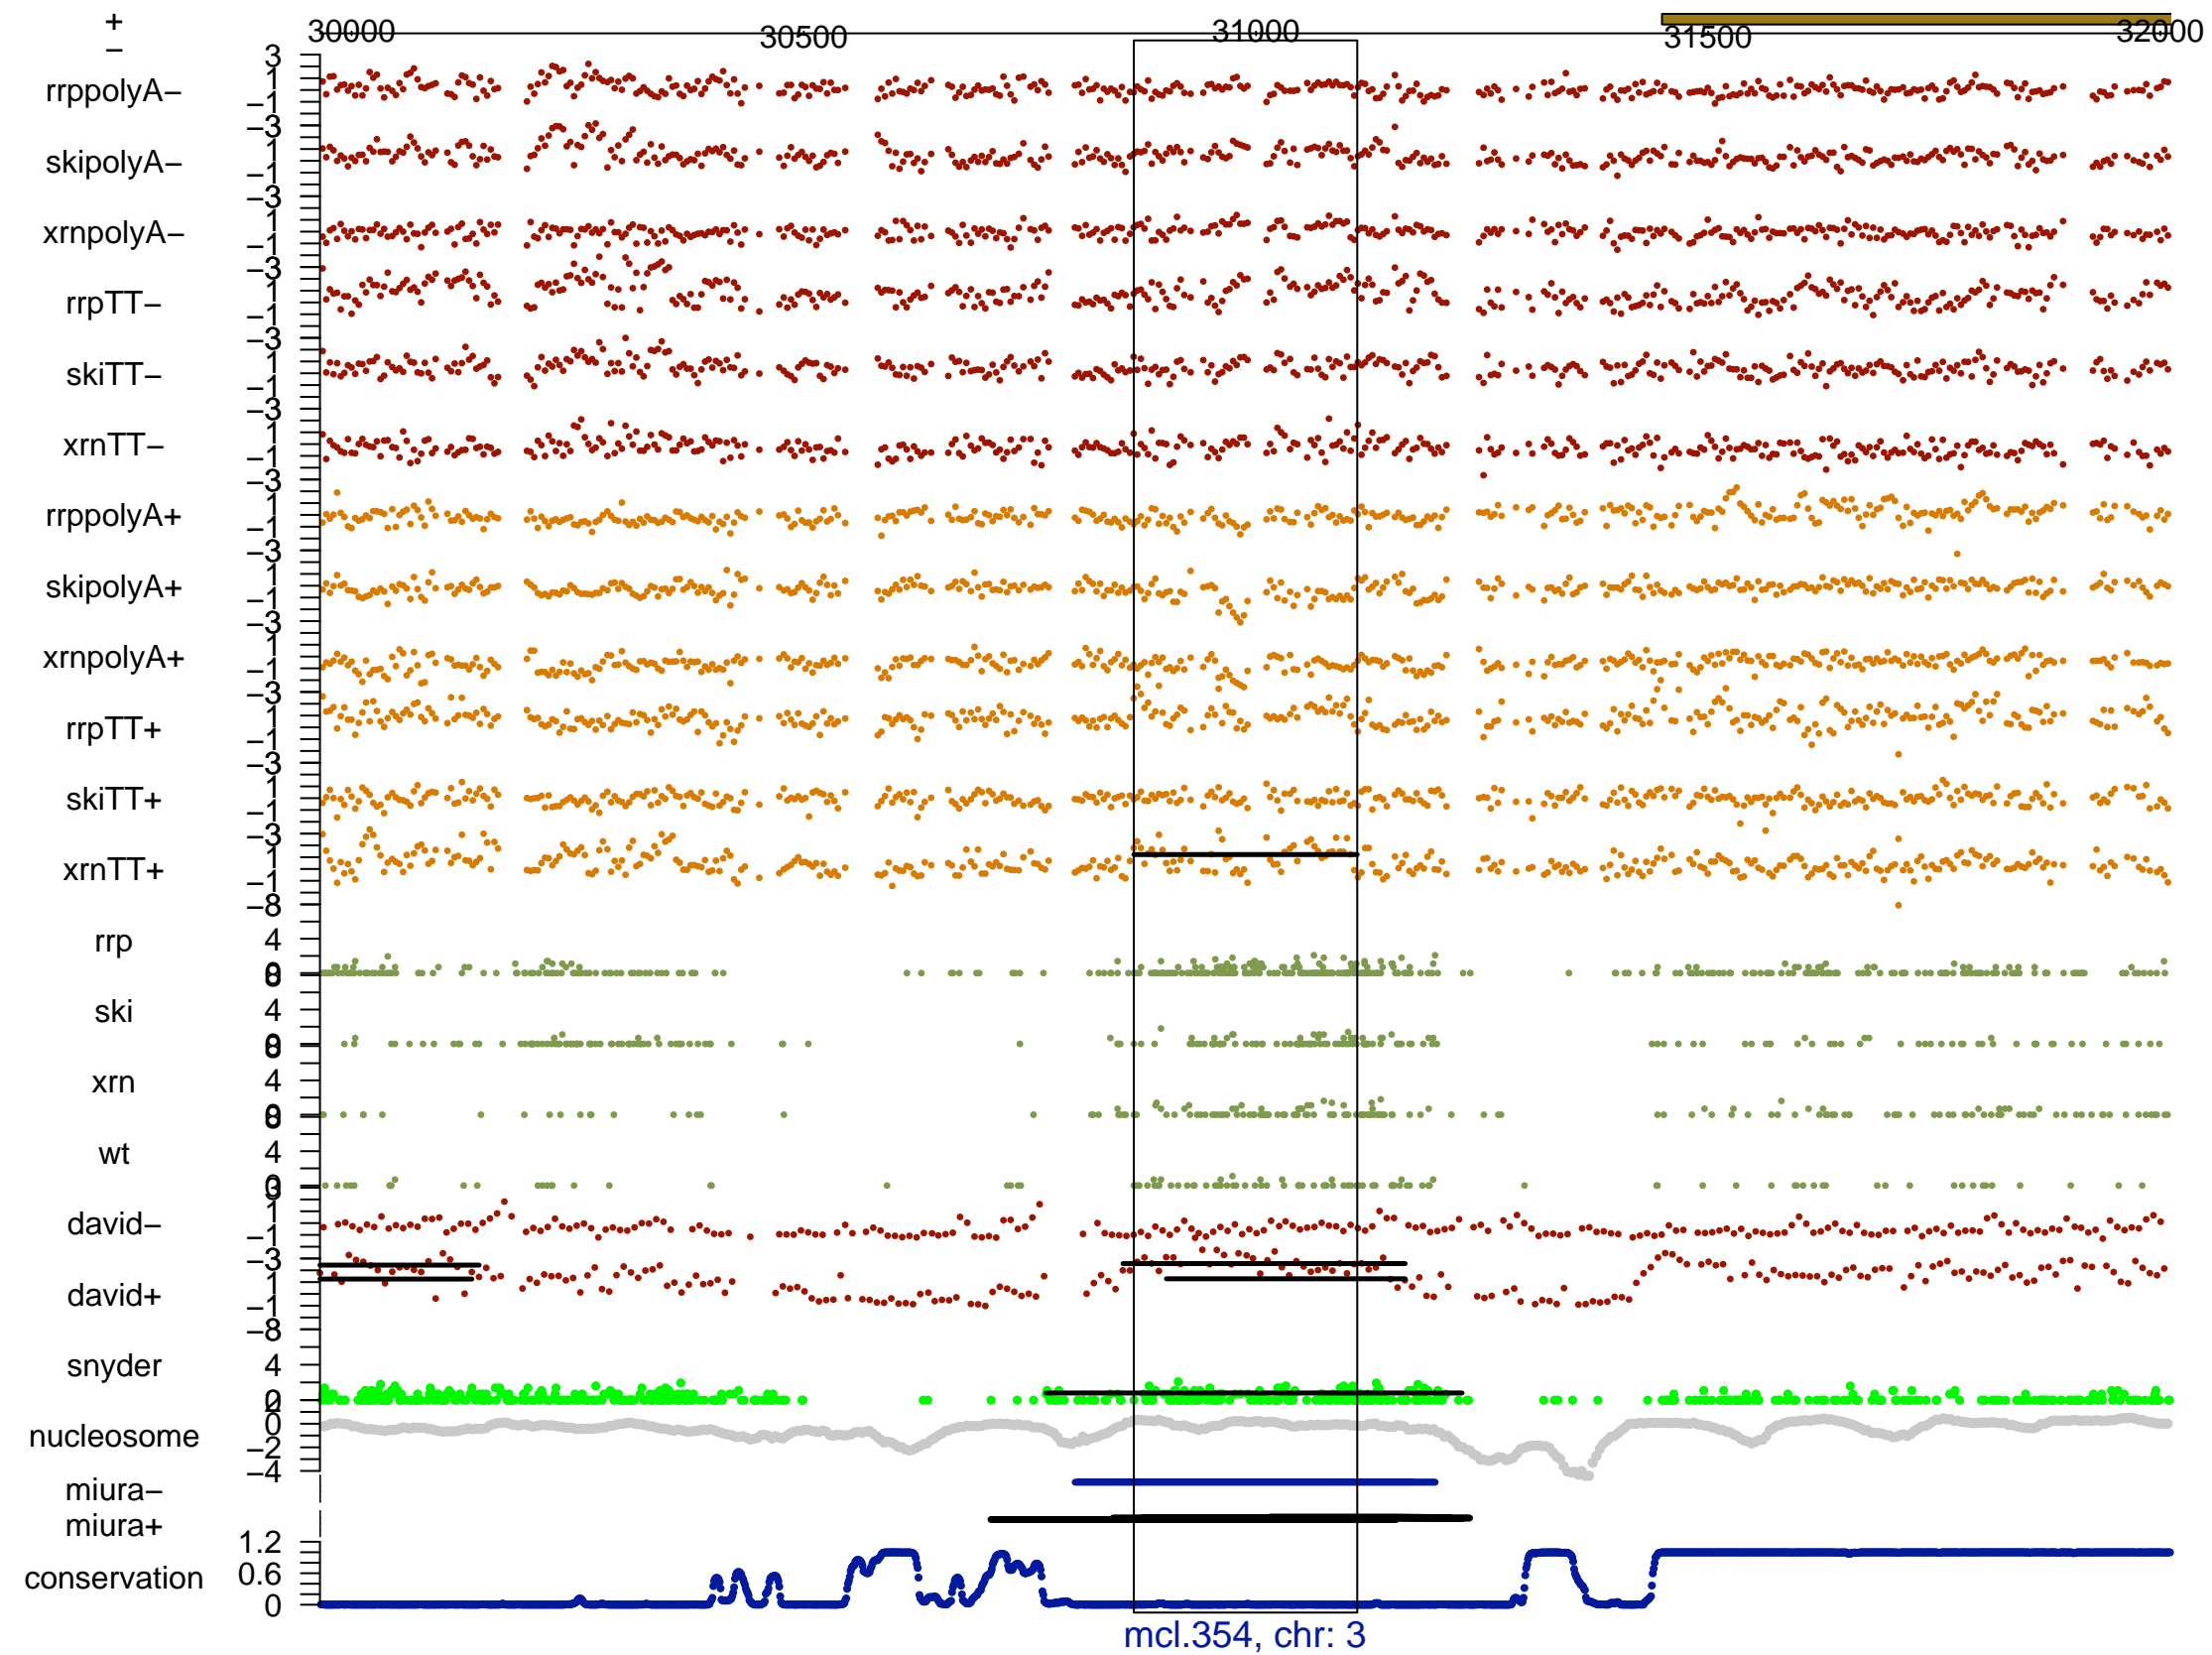

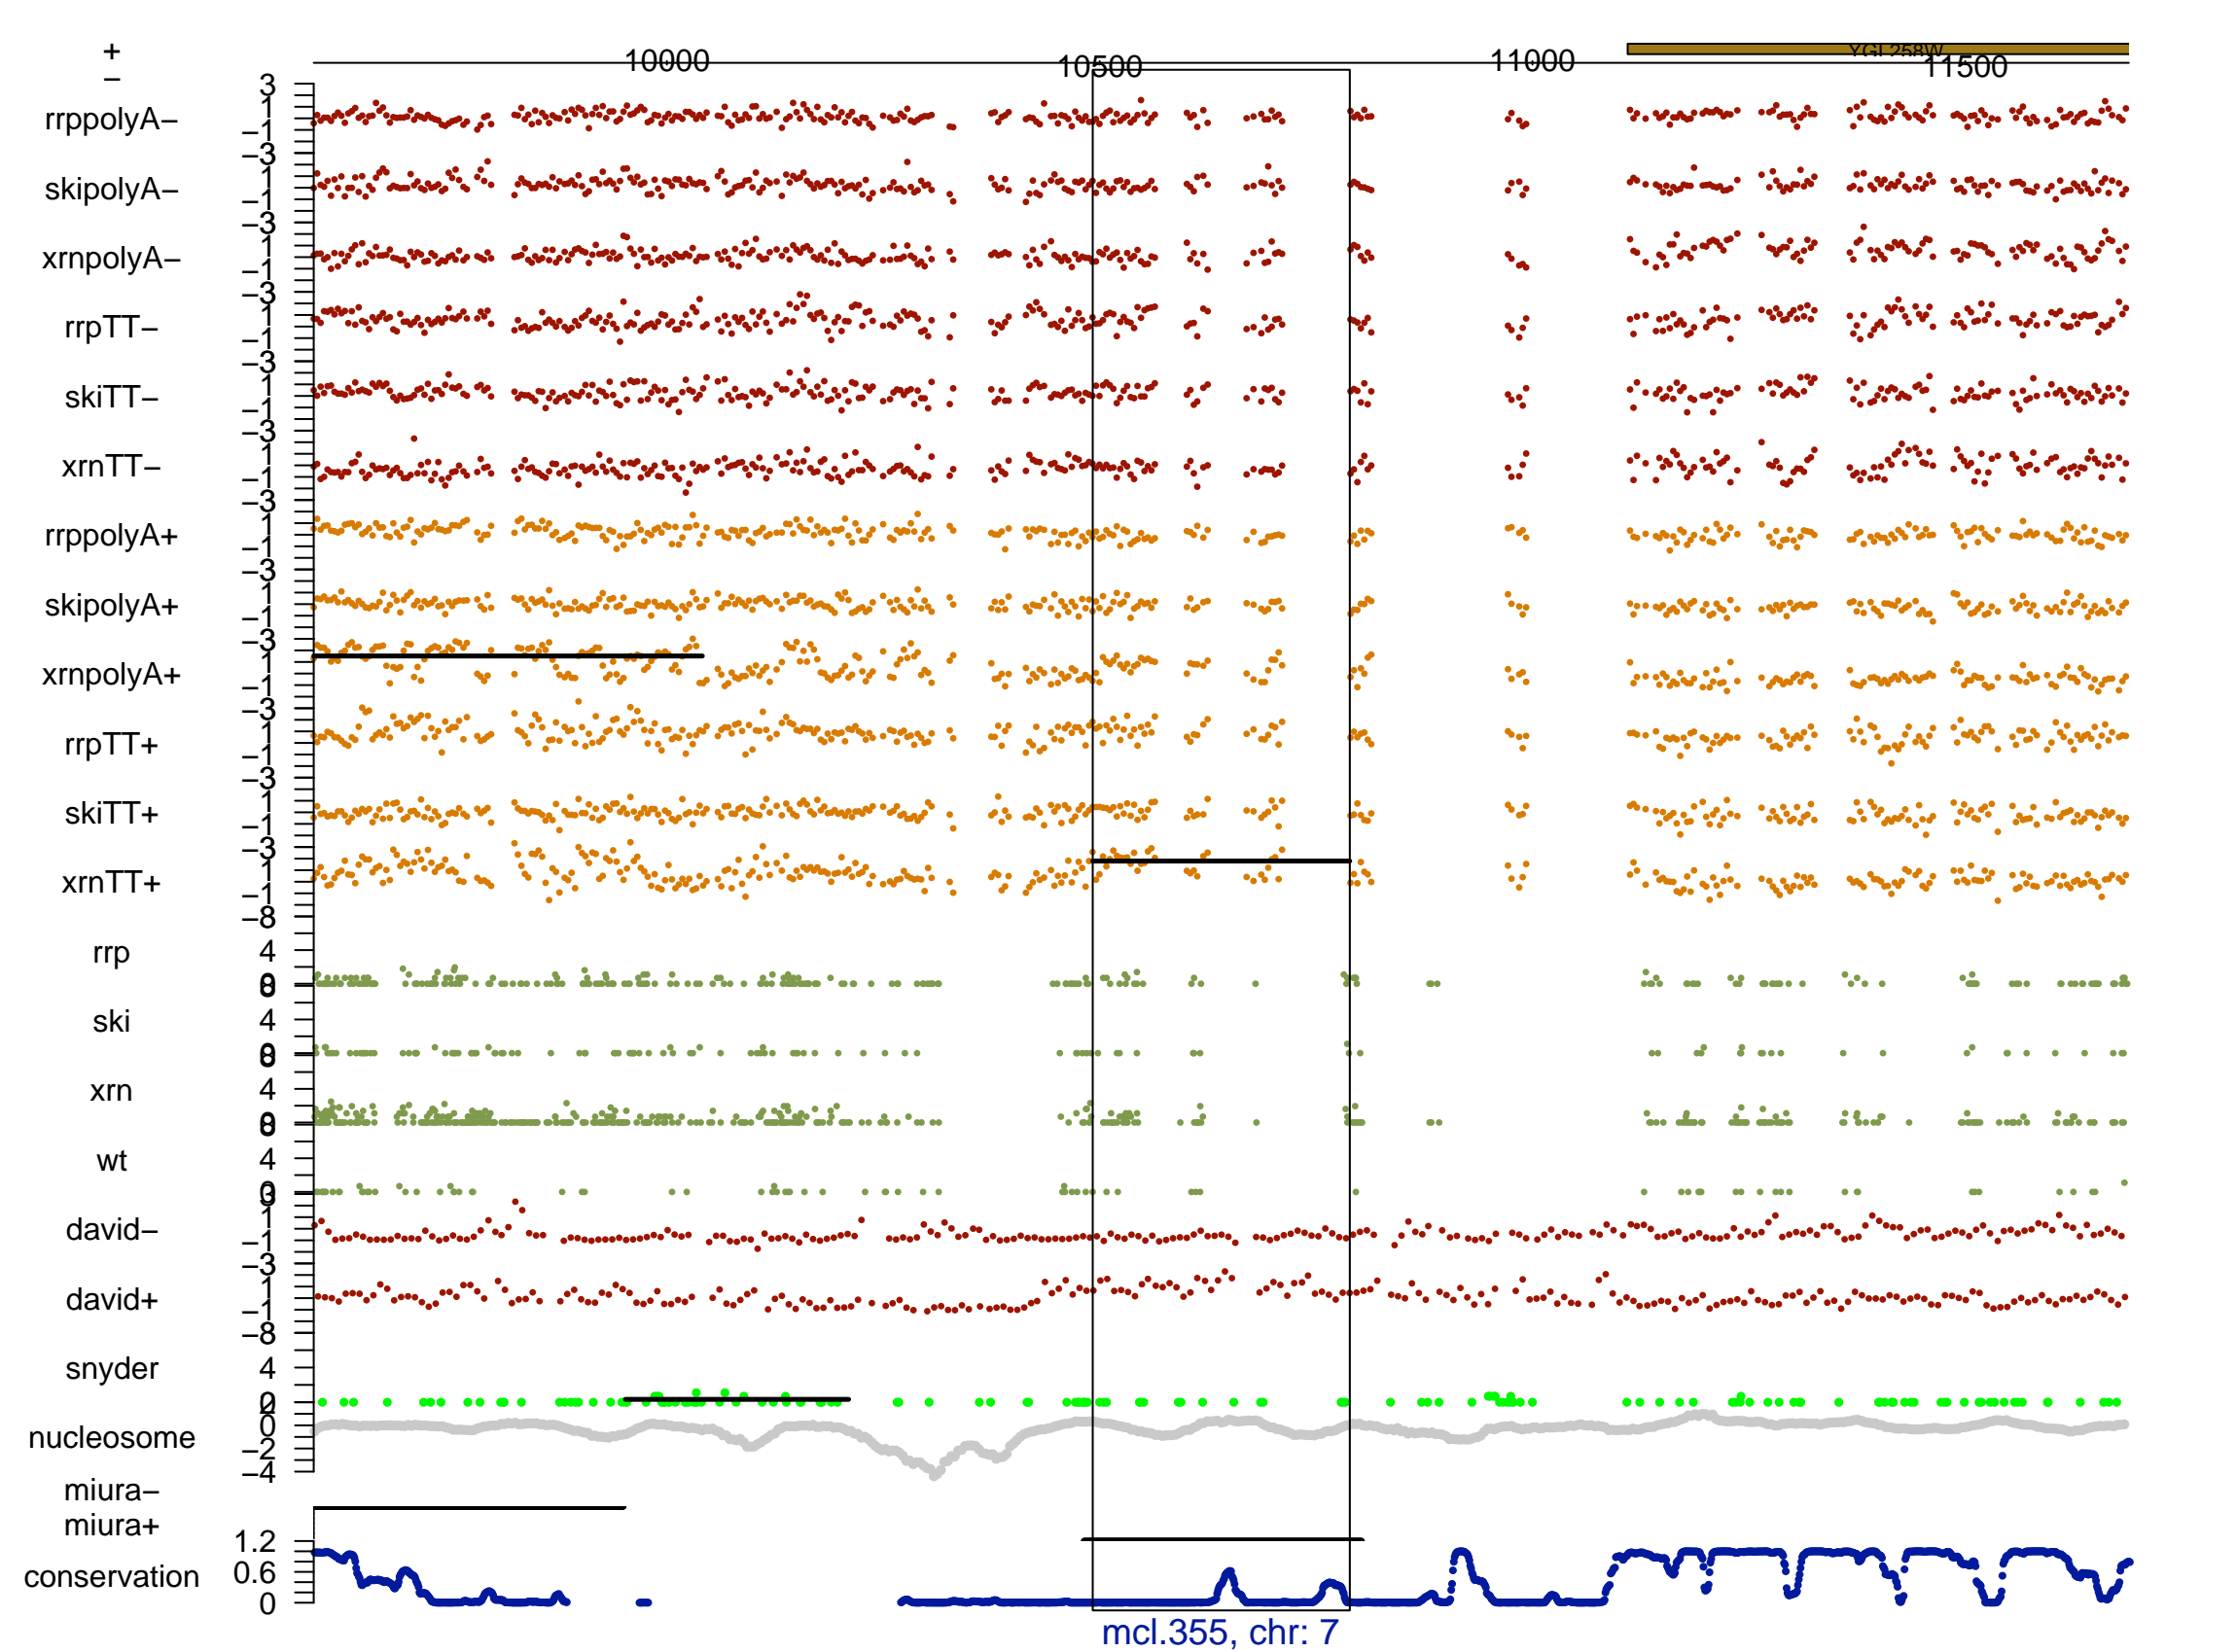







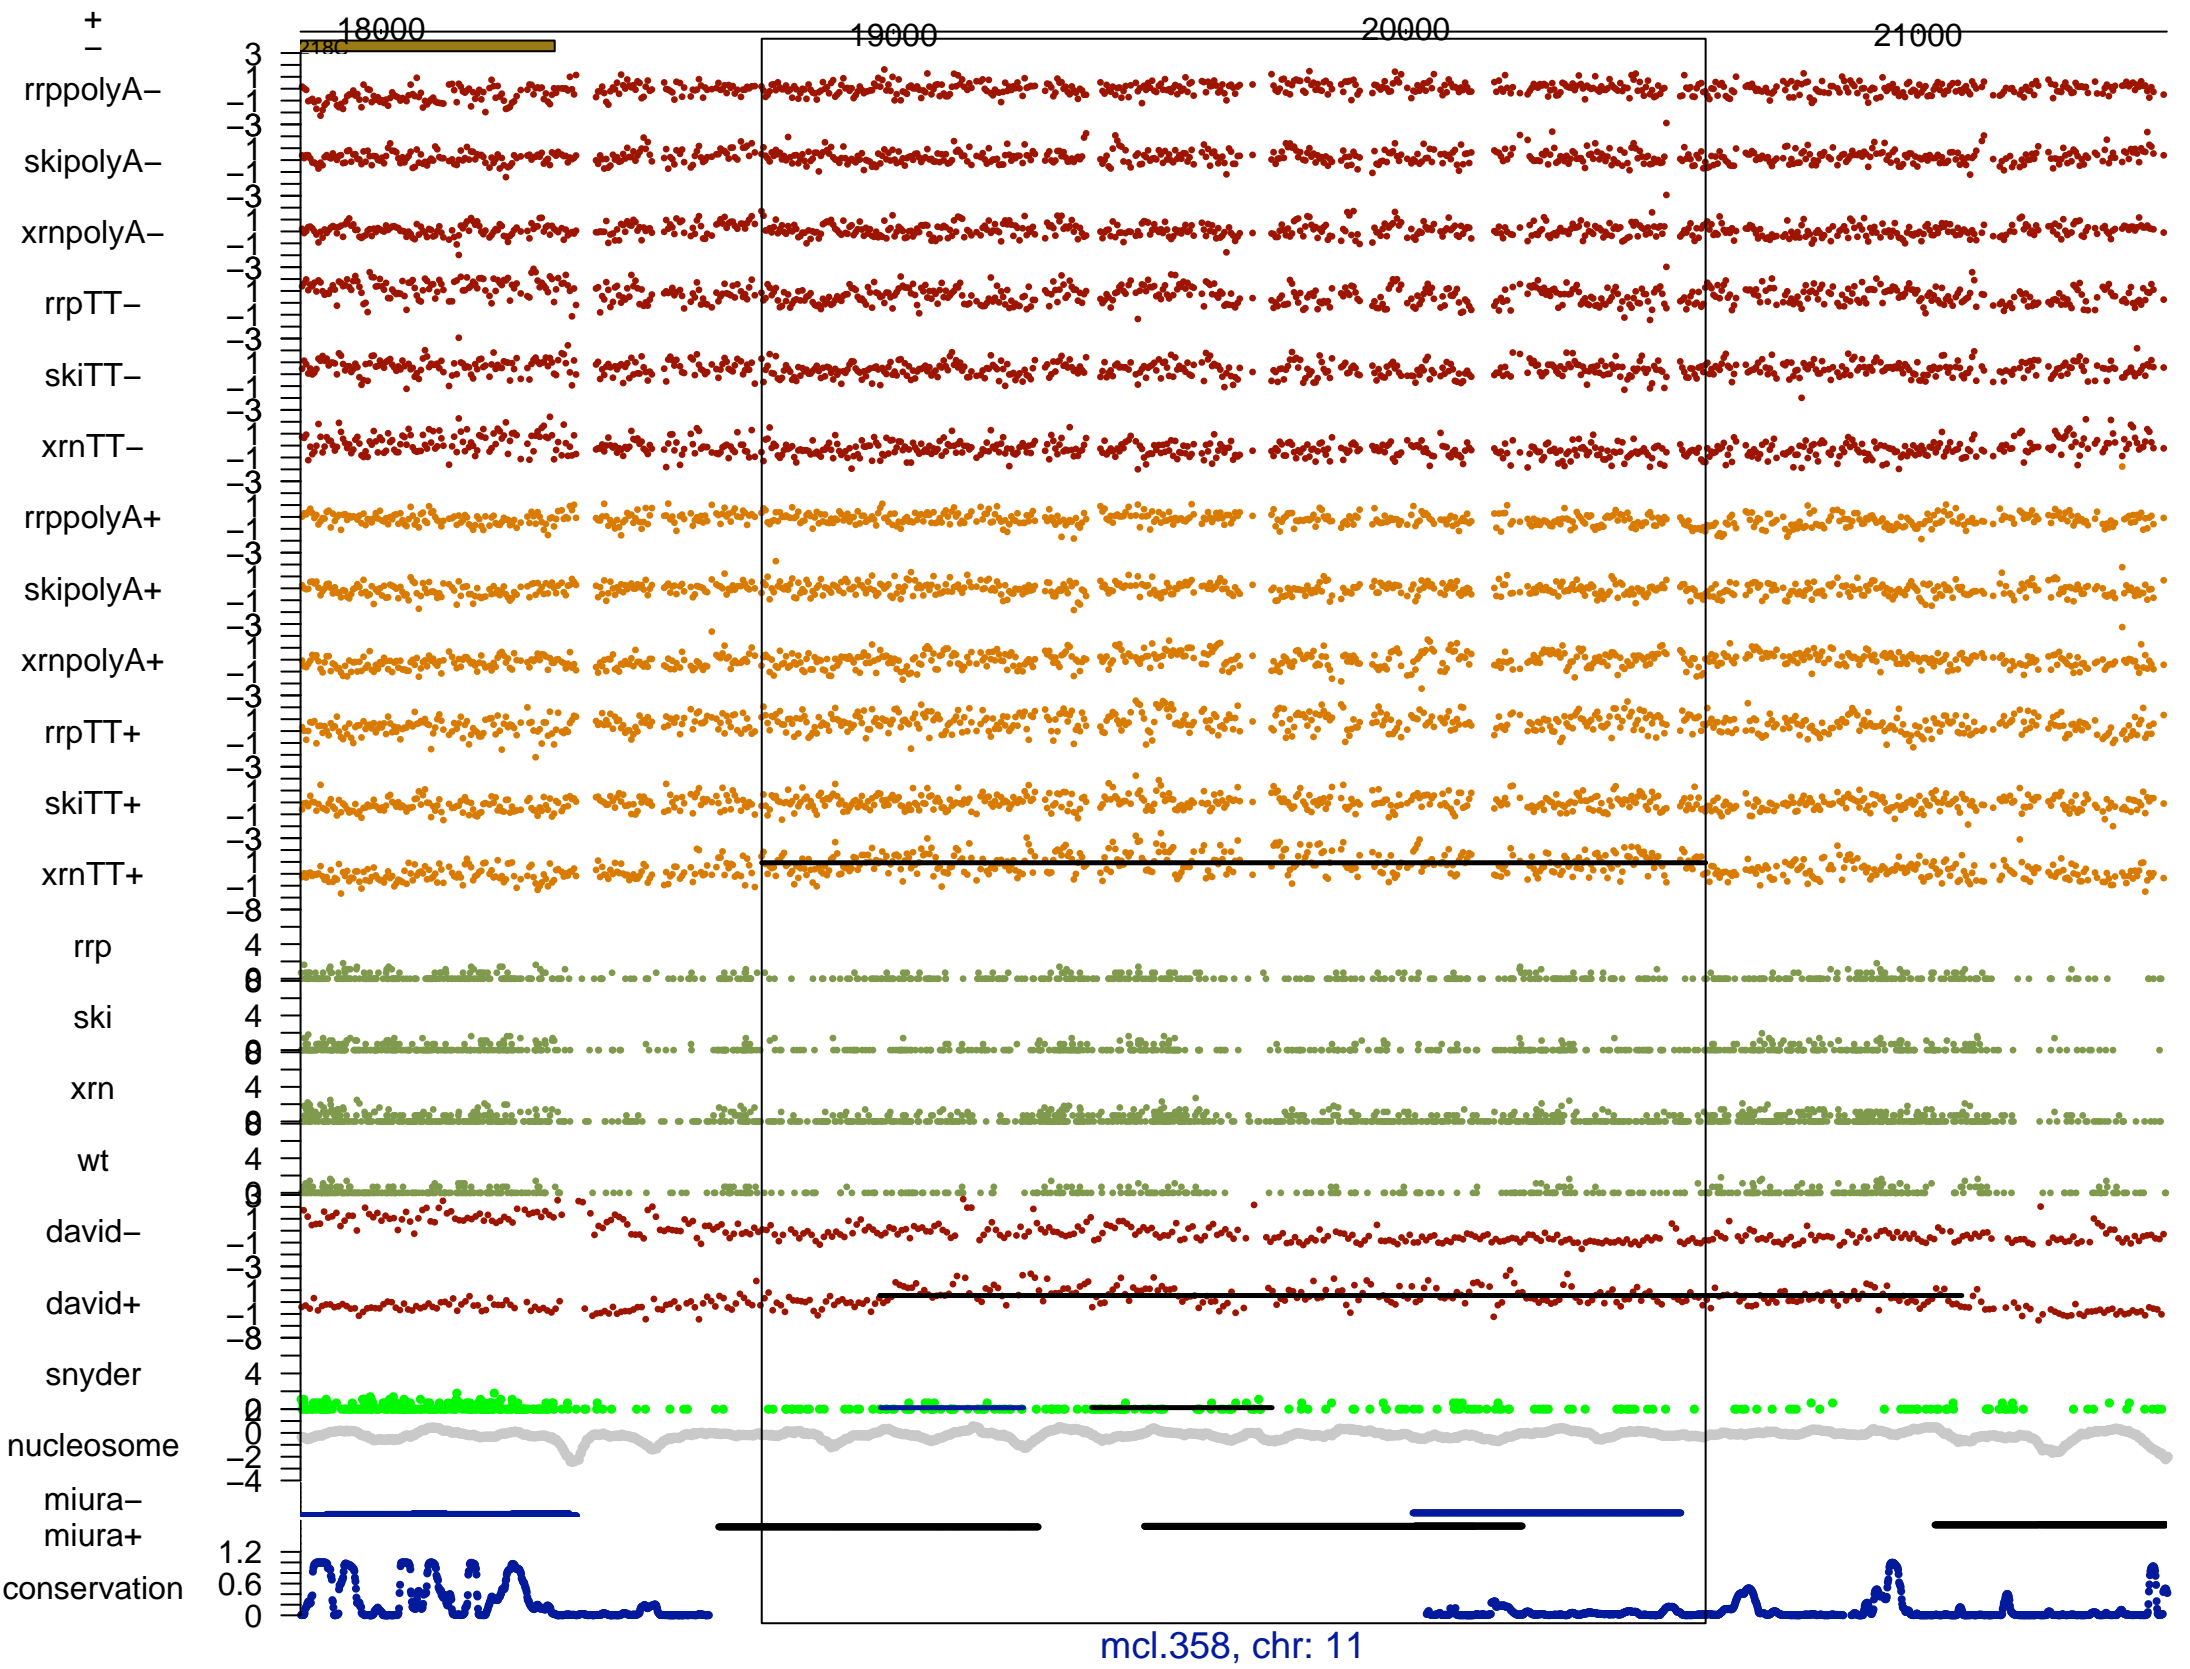

mcl.358, chr: 11



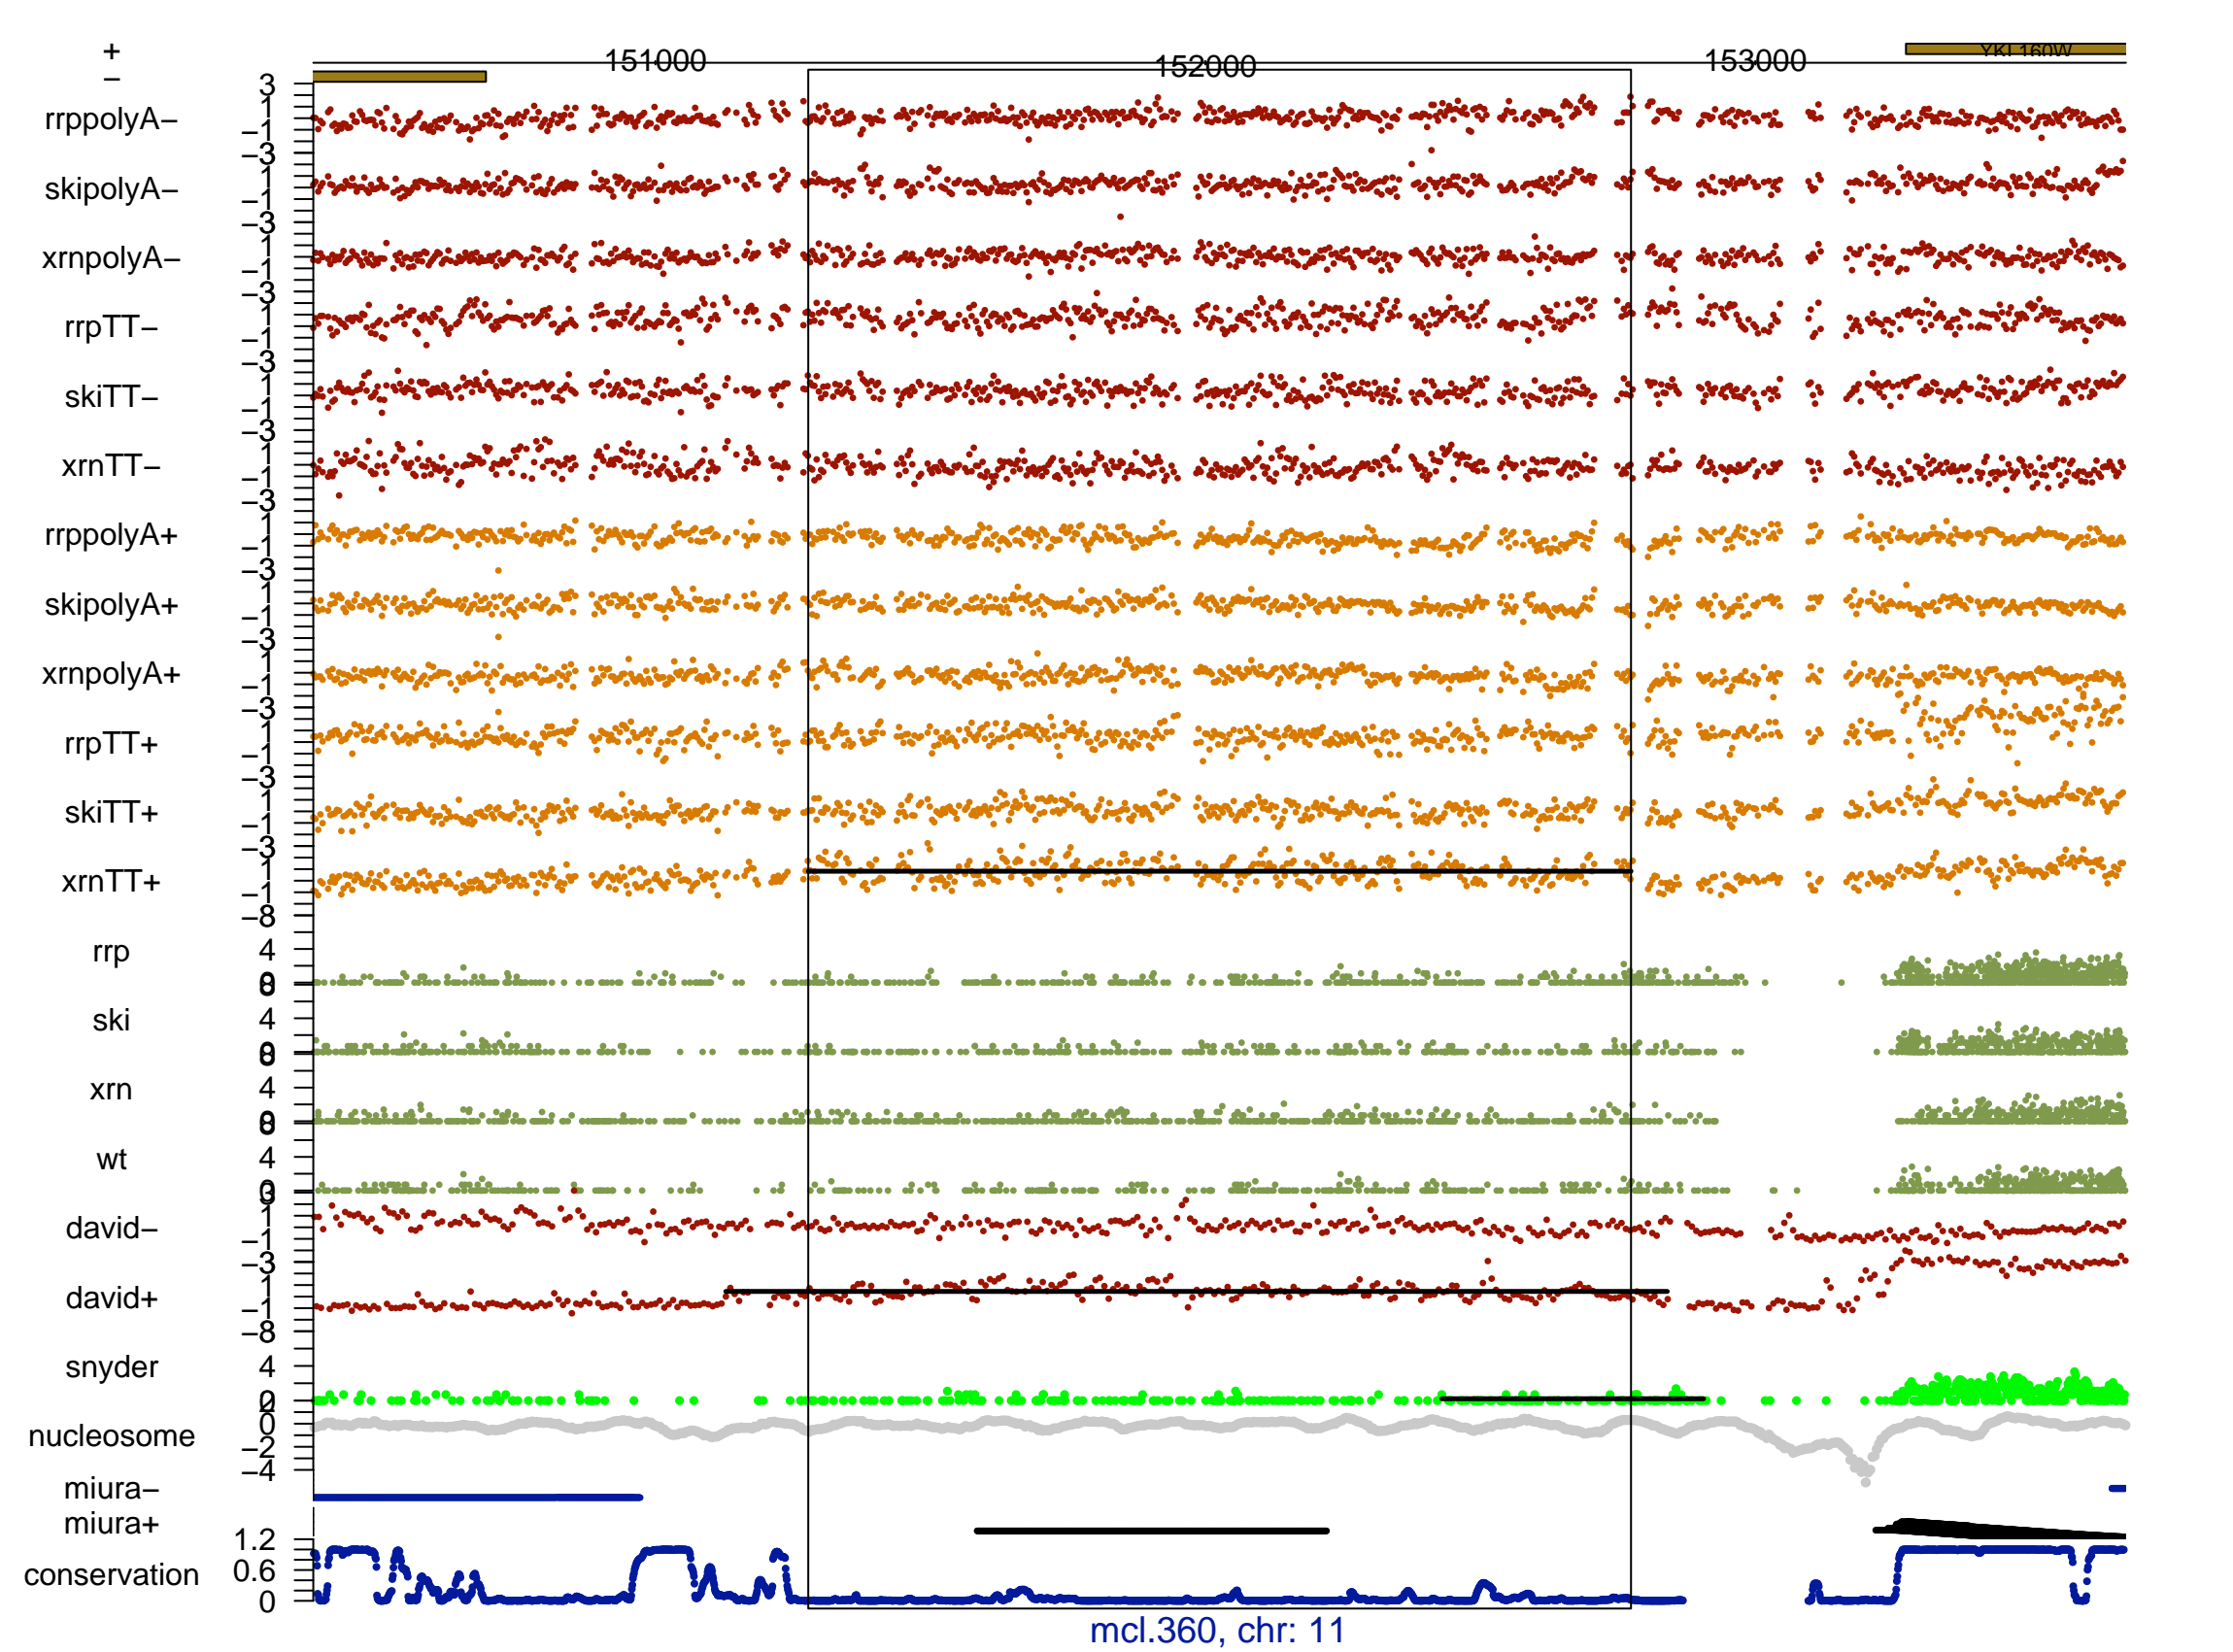



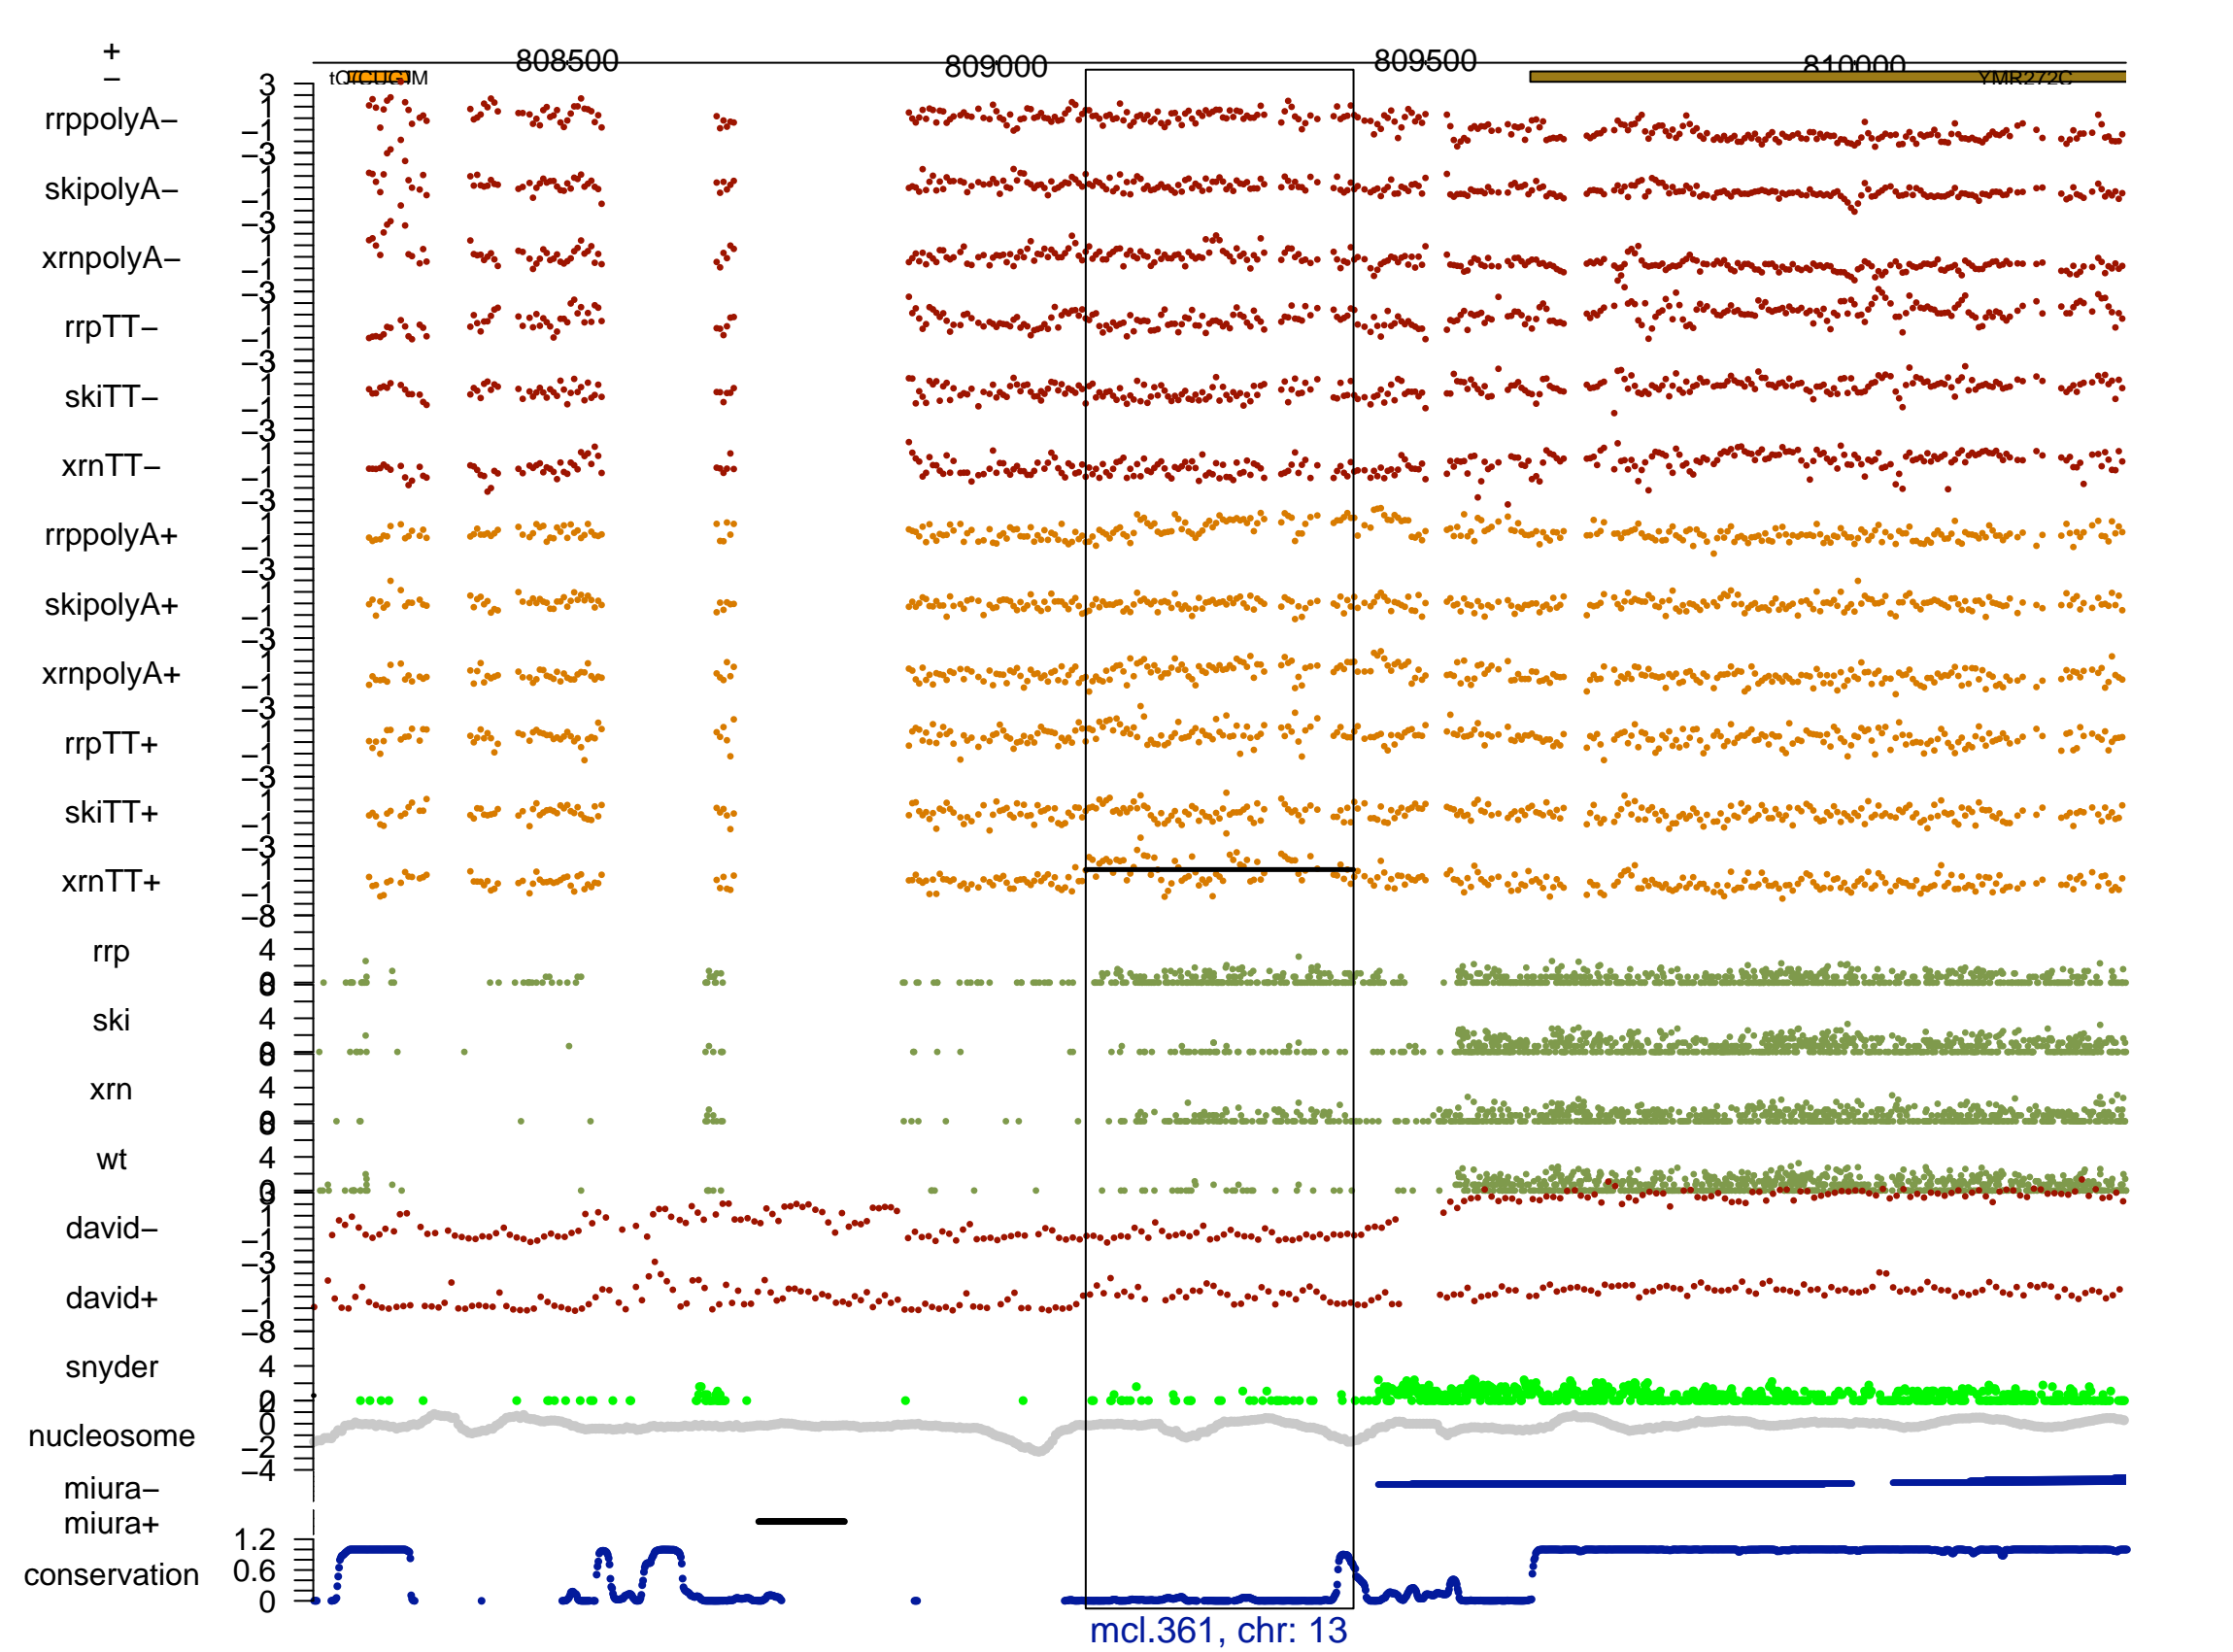

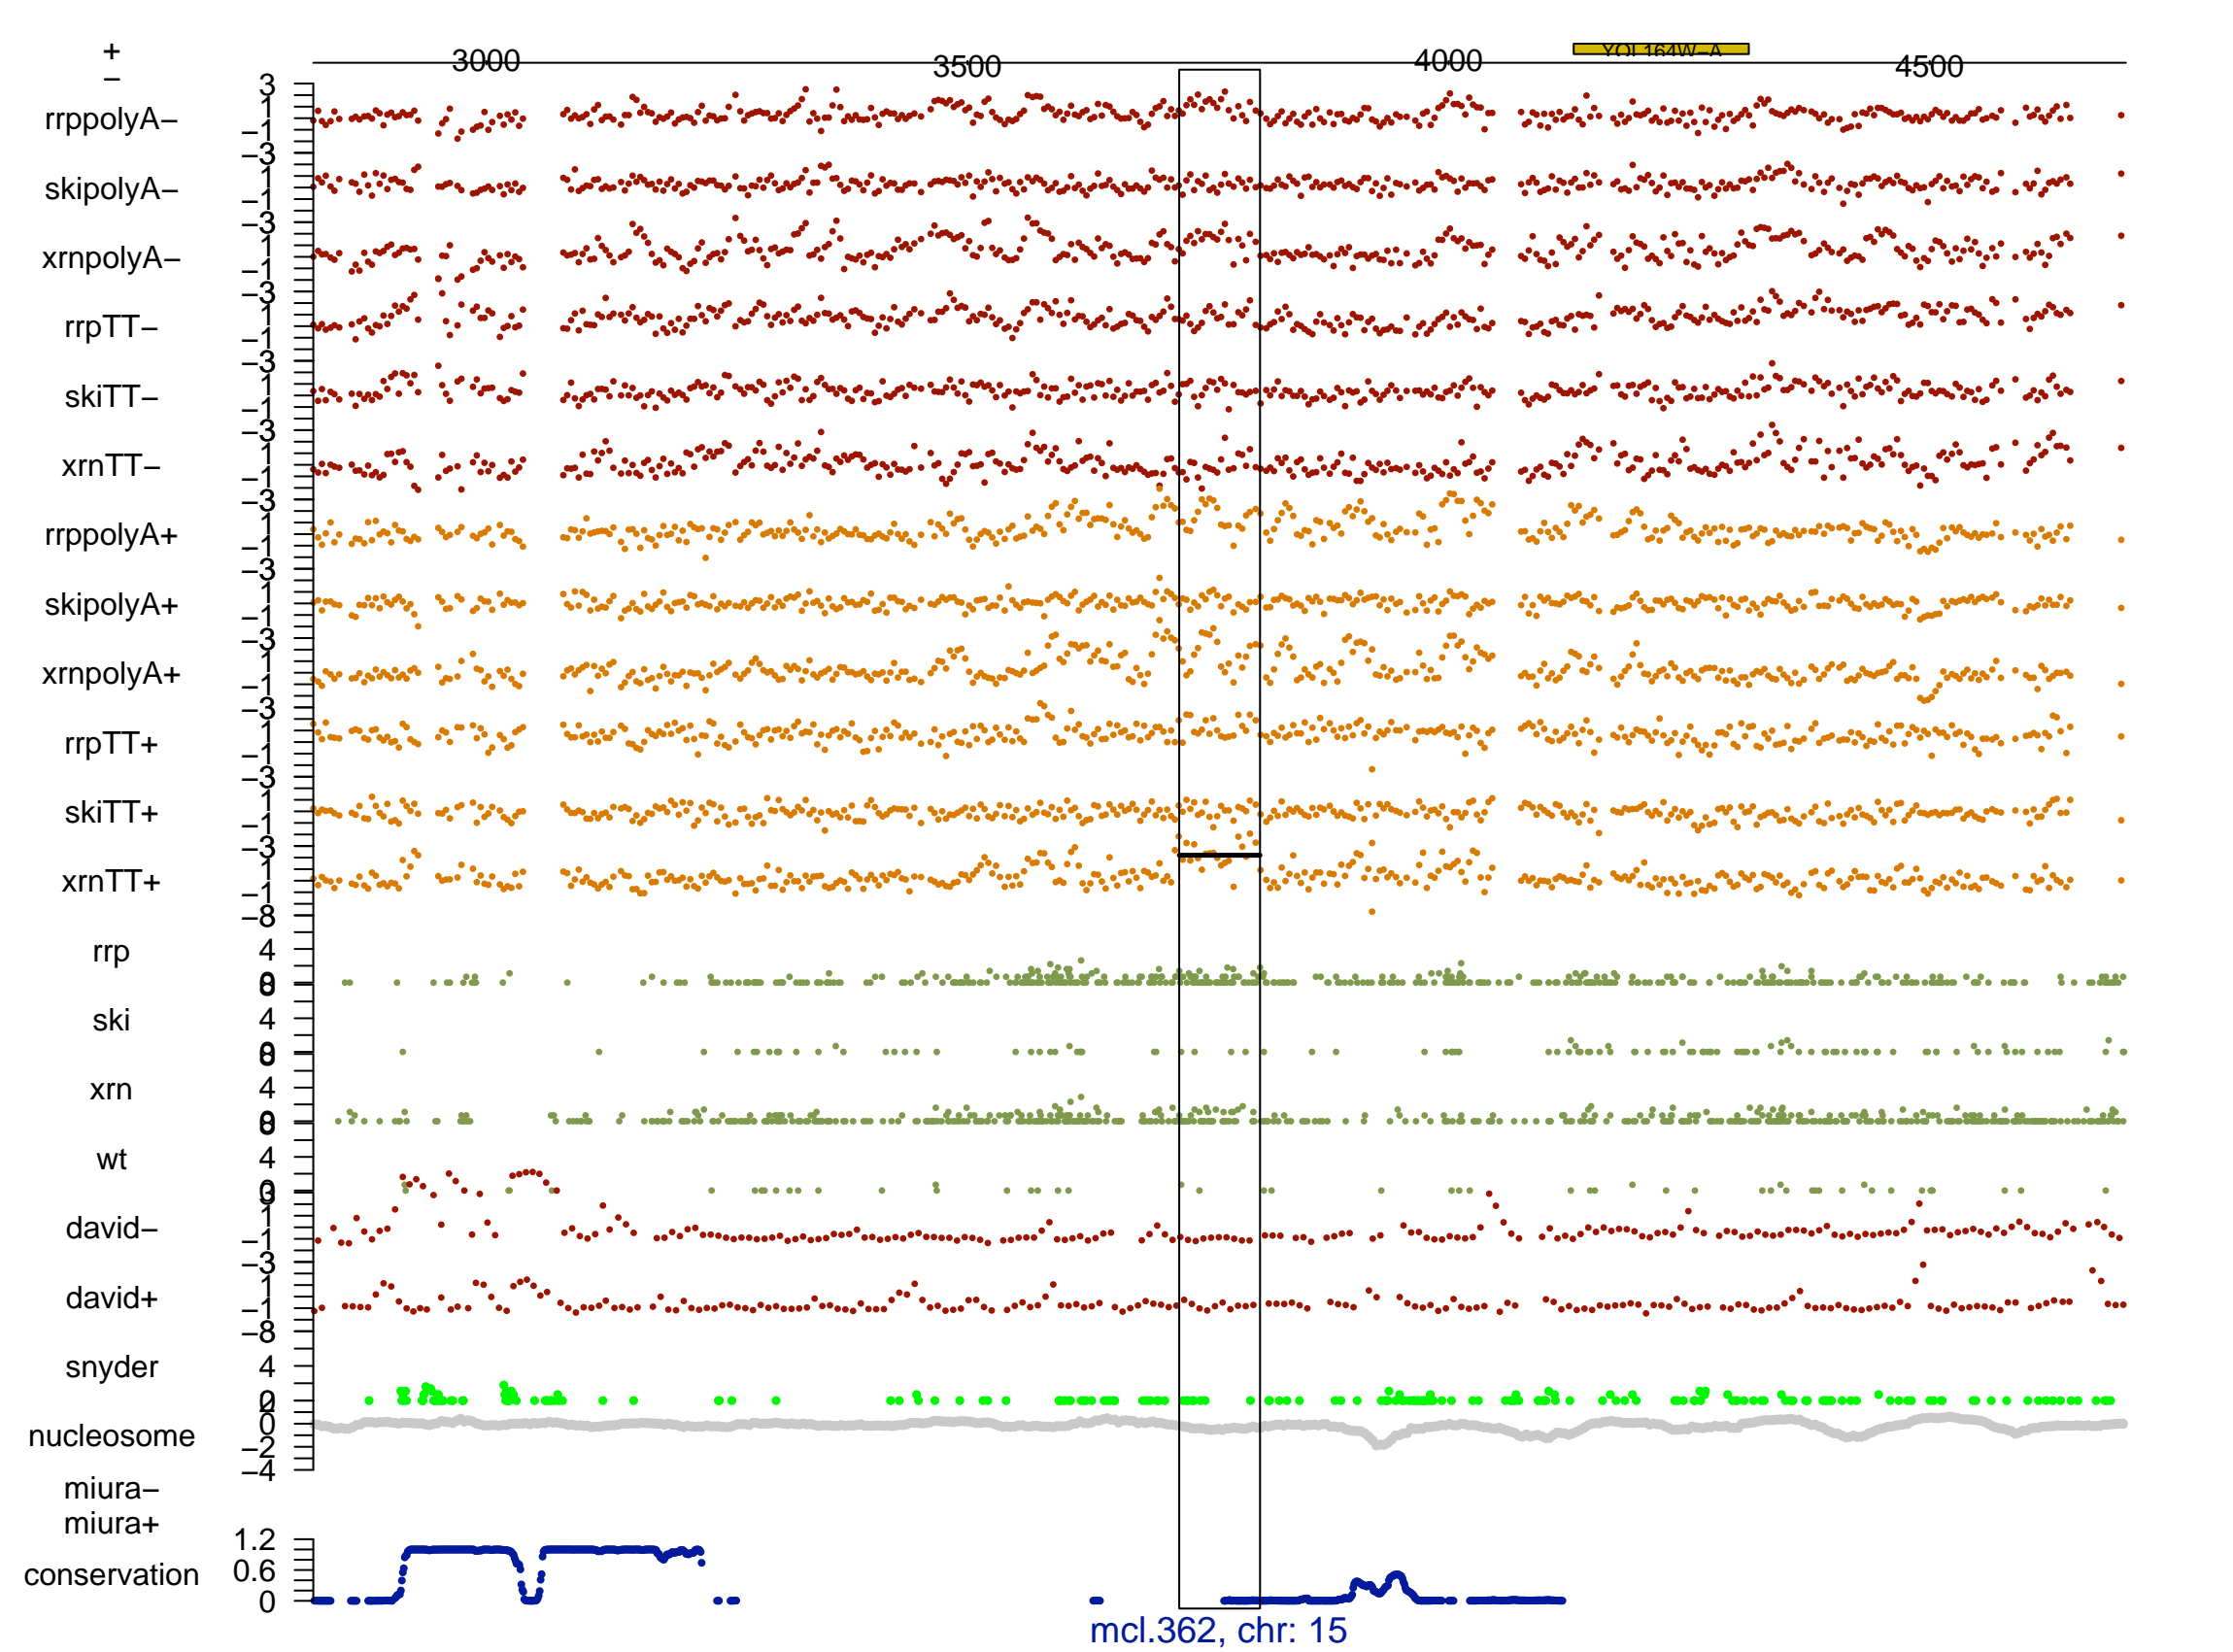

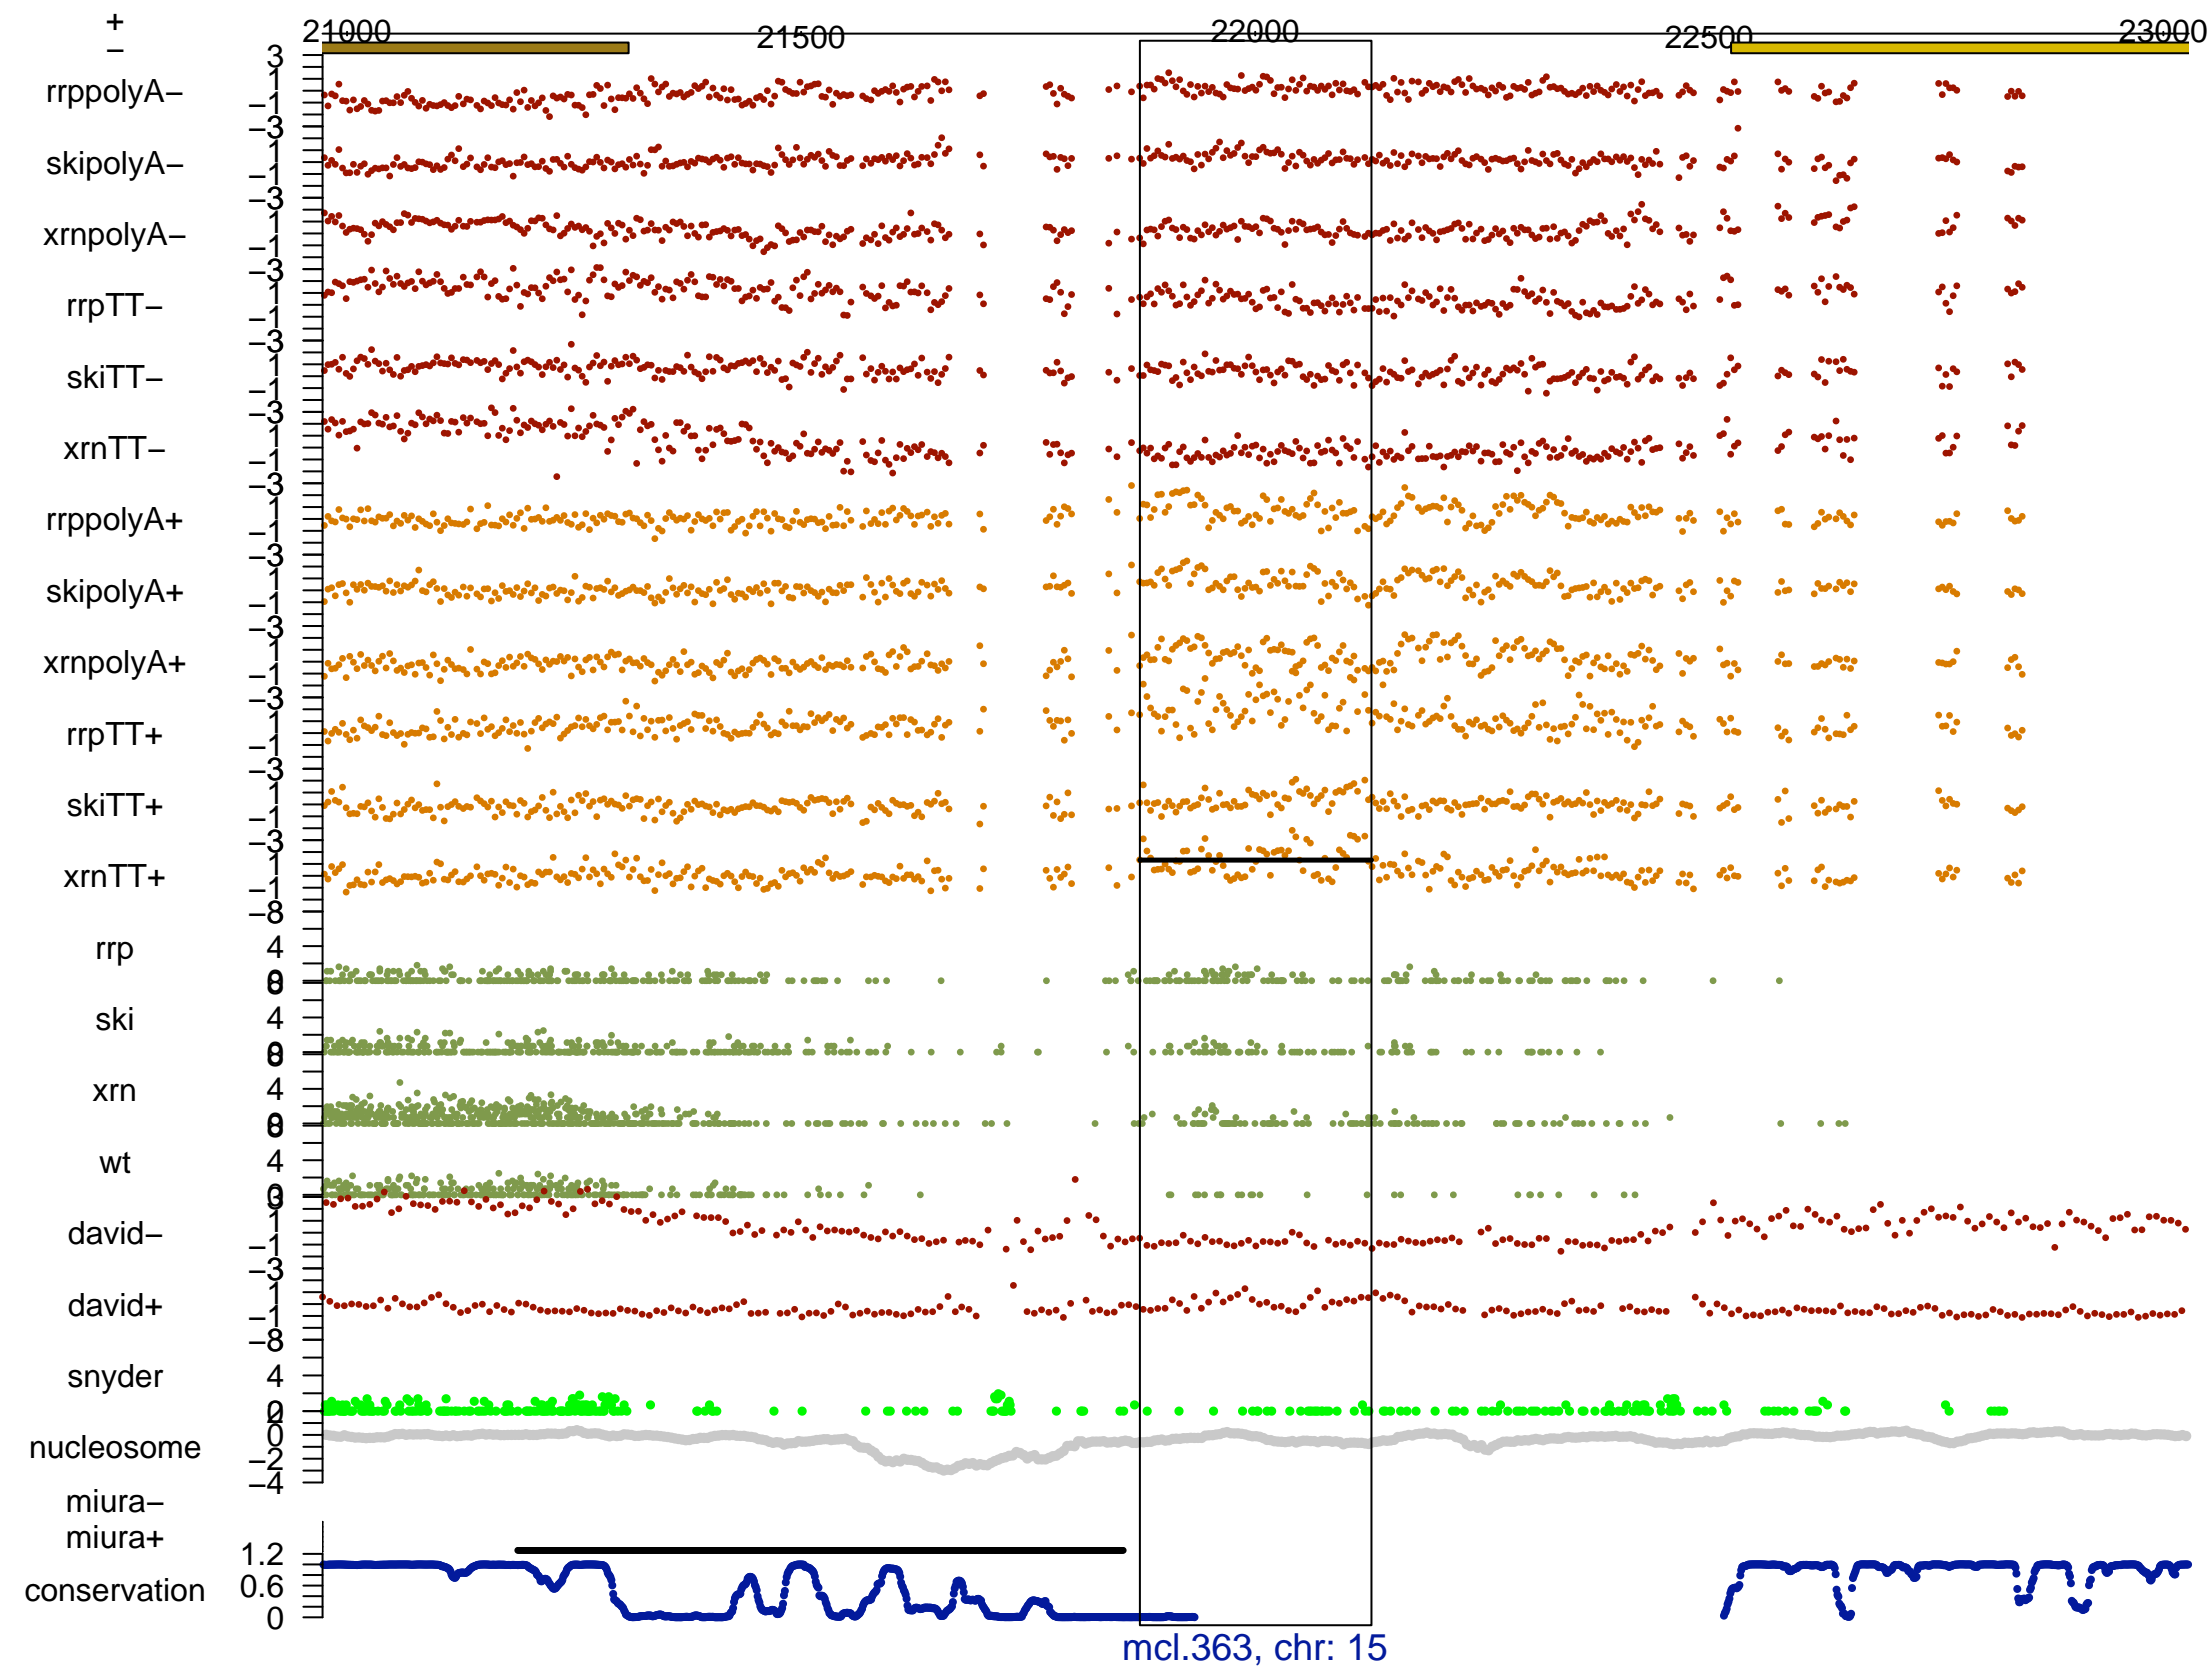

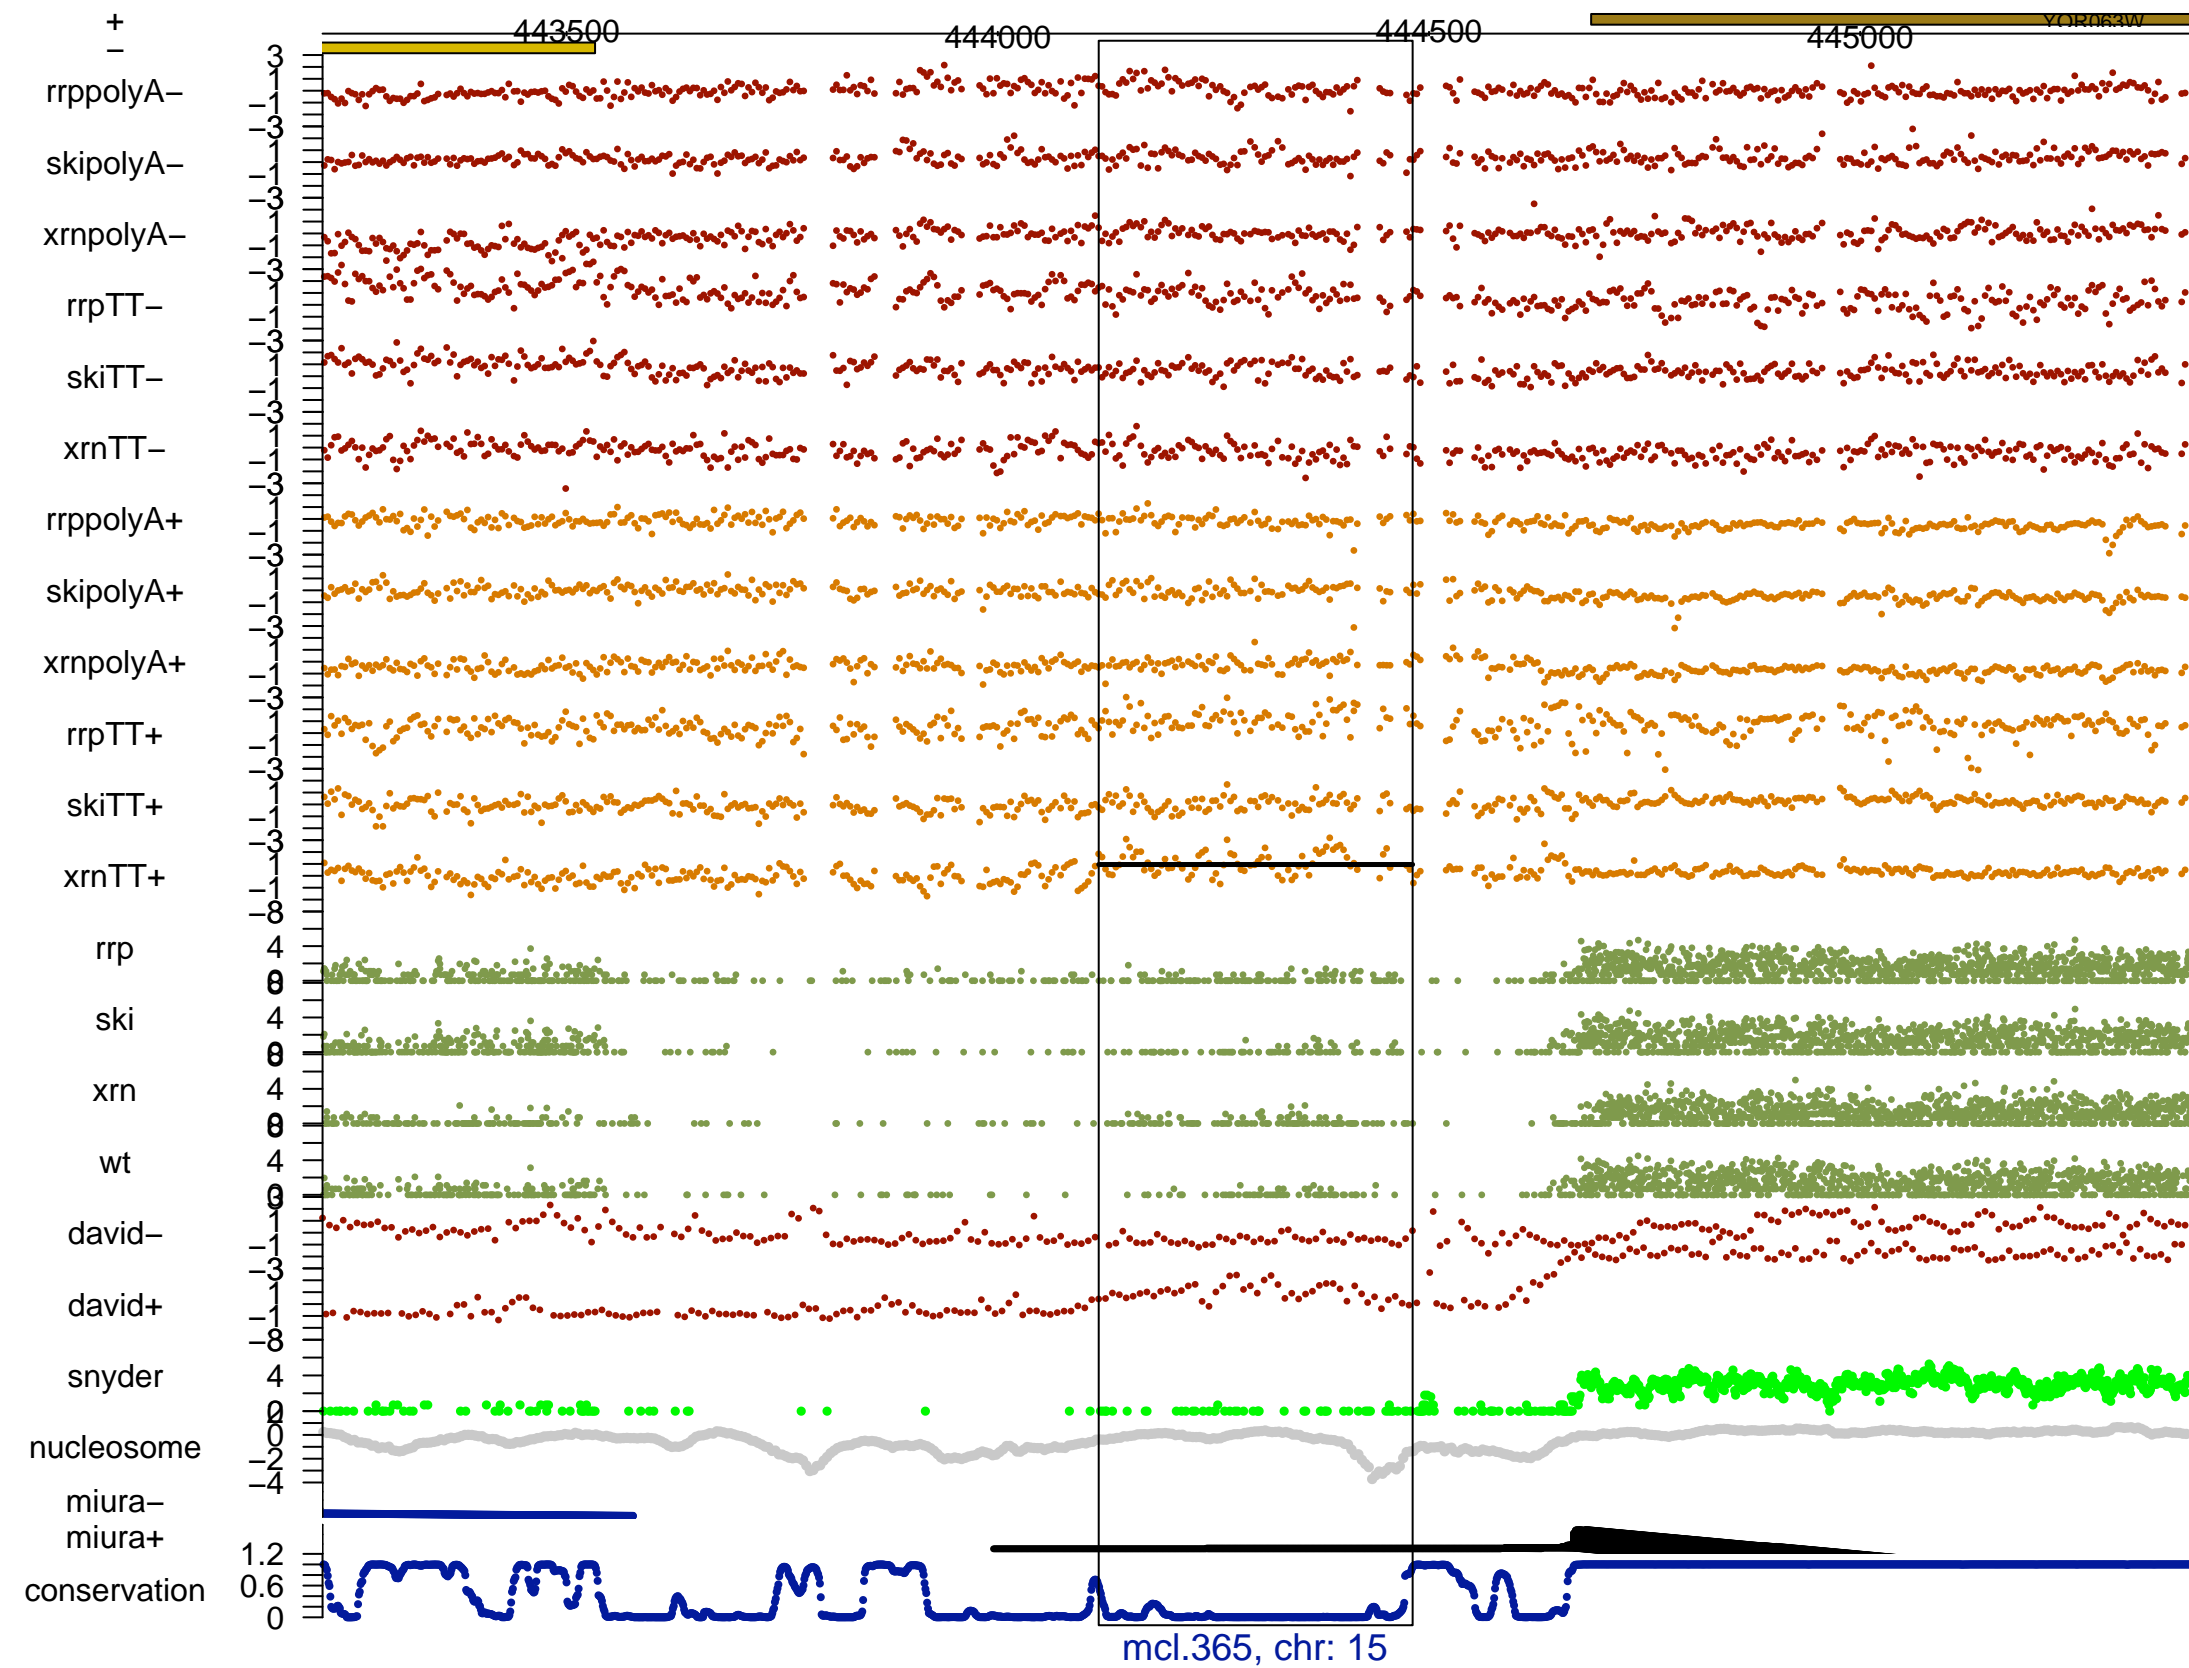



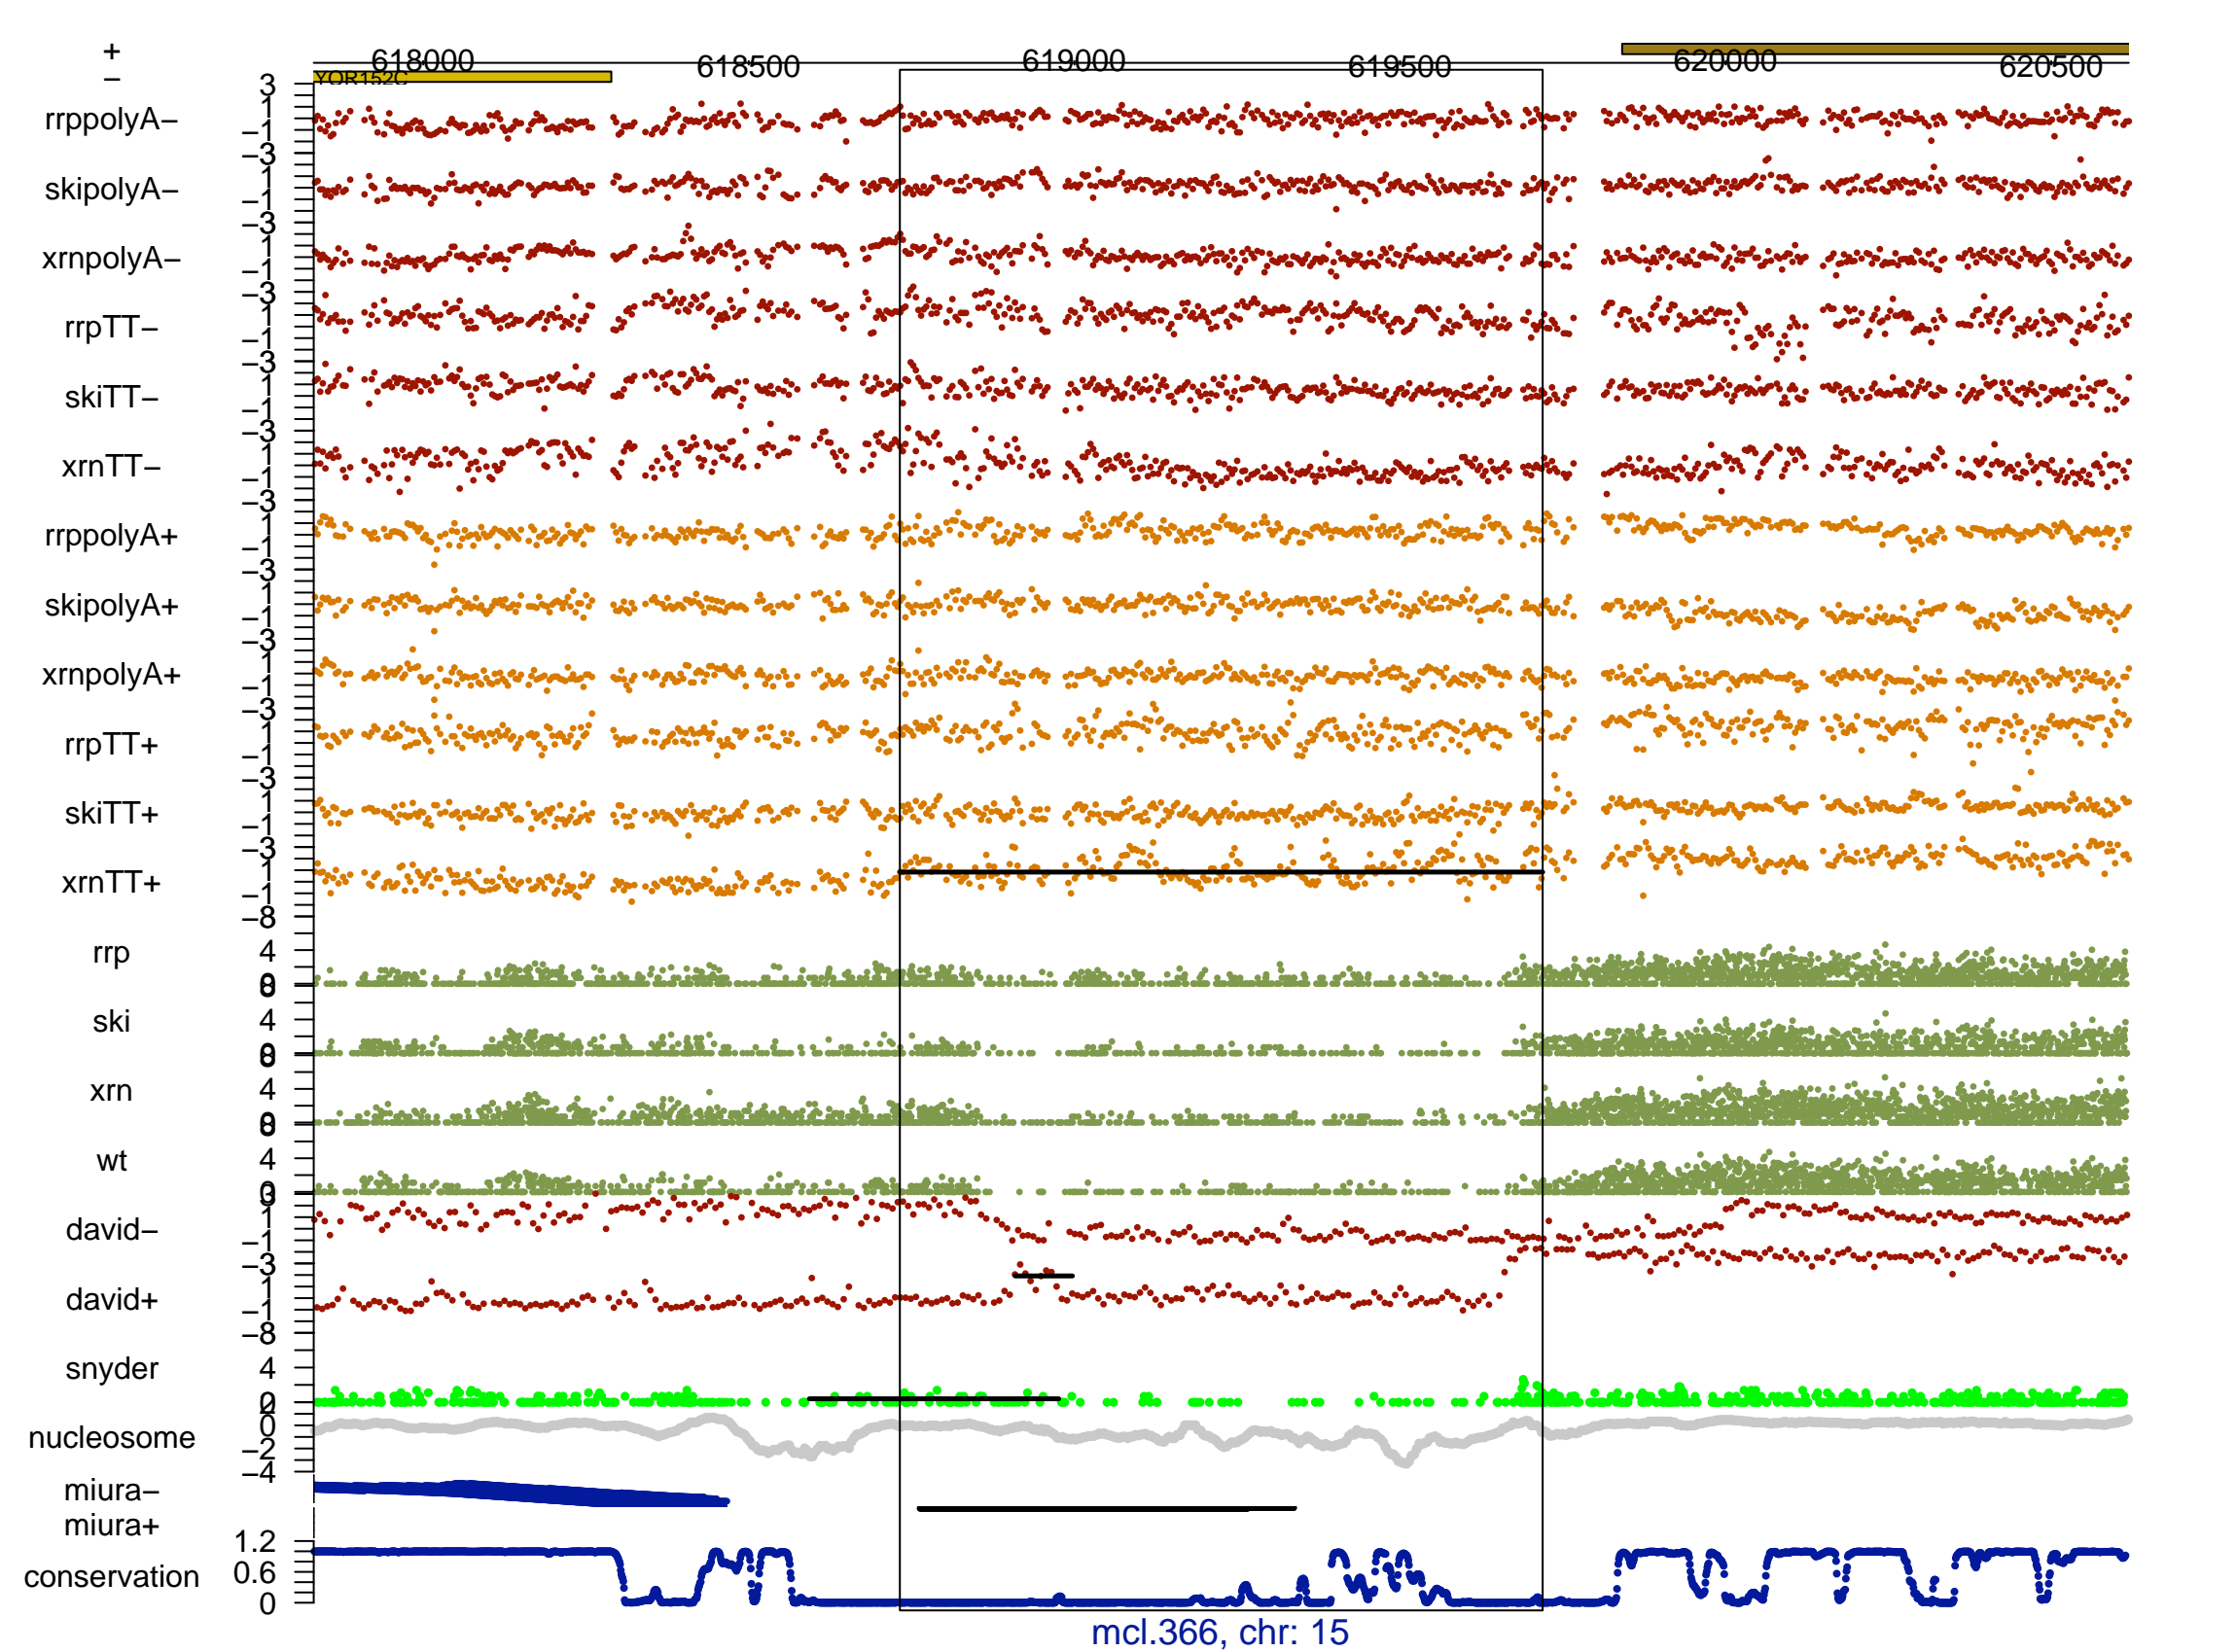

Supplement: pgen.1000299.s006.pdf [file pgen.1000299.s006.pdf]
