# Supplementary material for: Novel Low Abundance and Transient RNAs in Yeast Revealed by Tiling Microarrays and Ultra High–Throughput Sequencing Are Not Conserved Across Closely Related Yeast Species
Source: PubMed Central journal article supplement (PMC2601015; doi:10.1371/journal.pgen.1000299), 2008-12-19
Supplement: pgen.1000299.s002.pdf [file pgen.1000299.s002.pdf]

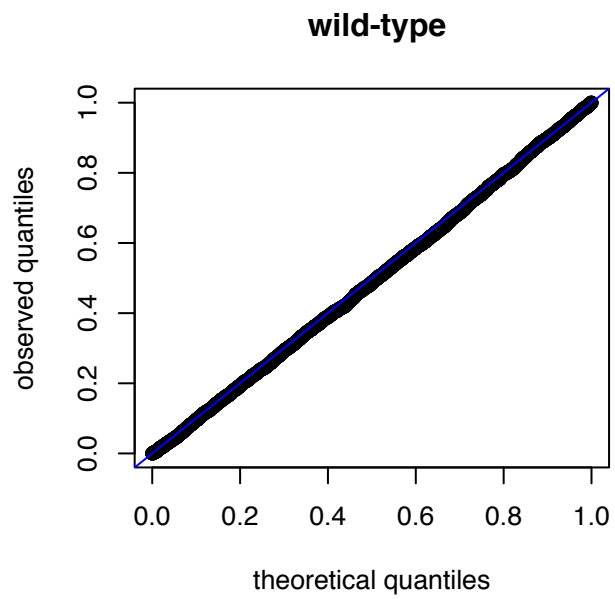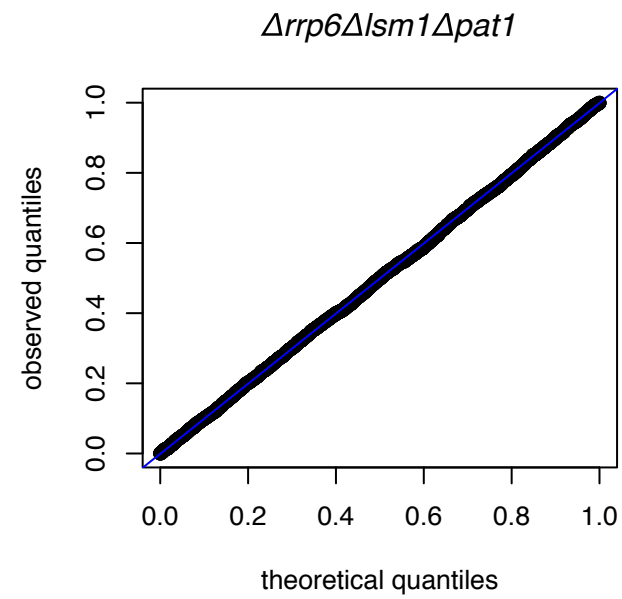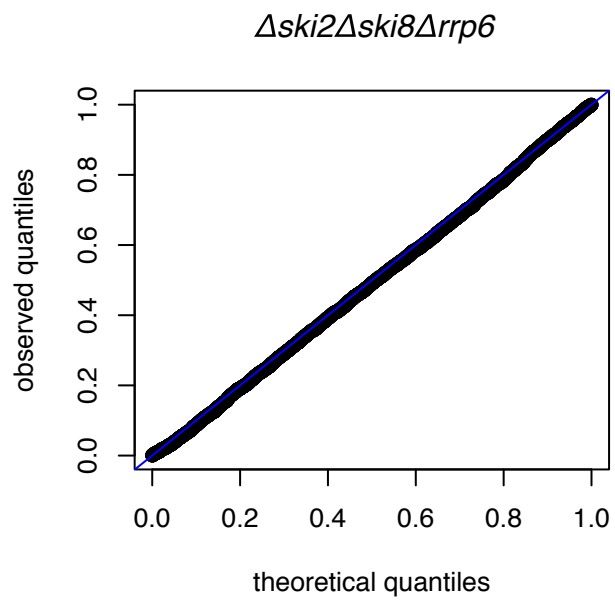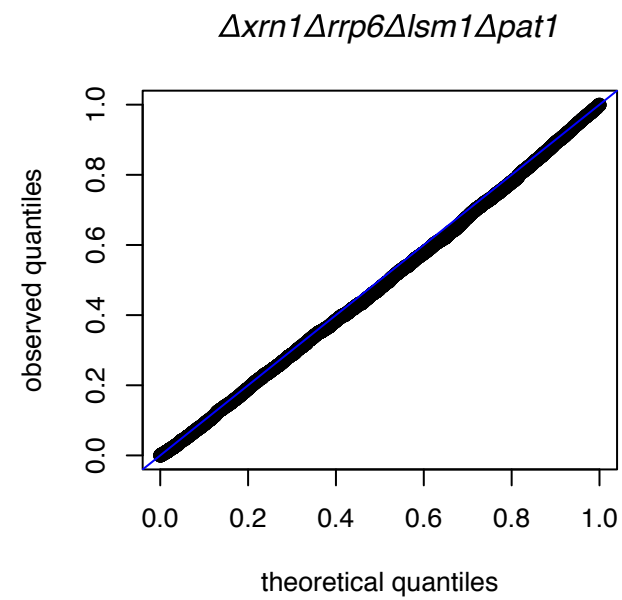

Figure S2
